# Supplementary material for: Immune challenge reduces gut microbial diversity and triggers fertility-dependent gene expression changes in a social insect
Source: BMC Genomics. 2020 Nov 23;21:816. doi: 10.1186/s12864-020-07191-9 (PMC7682046; doi:10.1186/s12864-020-07191-9)
Supplement: Supplementary file 1 — Additional file 1. Additional methodological details, Figures S1 and S2 and Table S2. Description of additional supplementary tables (Tables S1, S3-S18) are also provided. [file 12864_2020_7191_MOESM1_ESM.zip]

Archive with 18 entries (18 files):
- Supplemental Information BMC Genomics.pdf
- Table_S1.xlsx
- Table_S10.xlsx
- Table_S11.xlsx
- Table_S12.xlsx
- Table_S13.xlsx
- Table_S14.xlsx
- Table_S15.xlsx
- Table_S16.xlsx
- Table_S17.xlsx
- Table_S18.xlsx
- Table_S3.xlsx
- Table_S4.xlsx
- Table_S5.xlsx
- Table_S6.xlsx
- Table_S7.xlsx
- Table_S8.xlsx
- Table_S9.xlsx
