# Supplementary material for: Immune challenge reduces gut microbial diversity and triggers fertility-dependent gene expression changes in a social insect
Source: BMC Genomics. 2020 Nov 23;21:816. doi: 10.1186/s12864-020-07191-9 (PMC7682046; doi:10.1186/s12864-020-07191-9)
Supplement: Supplementary file 1 — Additional file 1. Additional methodological details, Figures S1 and S2 and Table S2. Description of additional supplementary tables (Tables S1, S3-S18) are also provided. [file 12864_2020_7191_MOESM1_ESM.zip › Table_S1.xlsx]

## Sheet: Feuil1
Colony_ID	Coordinates	QR	QL
110	31.910837; -109.252077	27	27
123	31.910837; -109.252077	46	45
125	31.910837; -109.252077	30	30
126	31.910837; -109.252077	22	23
128	31.910837; -109.252077	30	31
136	31.909071; -109.253337	27	27
141	31.909071; -109.253337	23	24
172	31.909071; -109.253337	25	25
188	31.909071; -109.253337	34	34
231	31.909071; -109.253337	30	30
291	31.909071; -109.253337	39	39
293	31.909071; -109.253337	55	55
311	31.908966; -109.247523	73	73
326	31.908966; -109.247523	64	64
335	31.908966; -109.247523	60	60
363	31.908966; -109.247523	41	41
364	31.909071; -109.253337	40	40
403	31.909071; -109.253337	28	28
473	31.912552; -109.241957	54	54
479	31.912552; -109.241957	24	24
487	31.912552; -109.241957	76	76
501	31.850508; -109.325624	39	39
502	31.850508; -109.325624	28	28
507	31.850508; -109.325624	65	65
517	31.850508; -109.325624	28	28
537	31.850508; -109.325624	49	49
543	31.912552; -109.241957	27	27
555	31.850508; -109.325624	37	37
565	31.850508; -109.325624	47	47
572	31.850508; -109.325624	52	52
631	31.850508; -109.325624	50	50
634	31.850508; -109.325624	38	38
645	31.850508; -109.325624	36	36
653	31.850508; -109.325624	36	36
680	31.850508; -109.325624	27	27
706	31.850508; -109.325624	35	35
748	31.850508; -109.325624	39	39
756	31.850508; -109.325624	38	38
766	31.850508; -109.325624	56	56
798	31.850508; -109.325624	27	27
804	31.850508; -109.325624	21	21
805	31.850508; -109.325624	32	32
826	31.855962; -109.329143	43	44
834	31.855962; -109.329143	38	38
A	31.91837; -108.252077	21	24
B	31.909071; -109.253337	45	48
C	31.909071; -109.253337	30	28
D	31.850508; -109.325624	24	22
E	31.850508; -109.325624	46	46
F	31.850508; -109.325624	22	24
G	31.855962; -109.329143	42	42
H	31.850508; -109.325624	18	16
