# Supplementary material for: Immune challenge reduces gut microbial diversity and triggers fertility-dependent gene expression changes in a social insect
Source: BMC Genomics. 2020 Nov 23;21:816. doi: 10.1186/s12864-020-07191-9 (PMC7682046; doi:10.1186/s12864-020-07191-9)
Supplement: Supplementary file 1 — Additional file 1. Additional methodological details, Figures S1 and S2 and Table S2. Description of additional supplementary tables (Tables S1, S3-S18) are also provided. [file 12864_2020_7191_MOESM1_ESM.zip › Table_S3.xlsx]

## Sheet: a
Sample_ID	Number of mapped	Total number of paired reads	Back_mapping_rate
B-NF-NIC	31684950	44226356	0.716427
B-F-NIC	15732208	22464462	0.700315
B-F-IC	16869840	23747426	0.710386
B-NF-IC	12762916	19112560	0.667776
C-F-NIC	21630376	30962406	0.698601
C-F-IC	17291304	24747586	0.698707
C-NF-NIC	24368246	34771534	0.70081
C-NF-IC	17599988	25046450	0.702694
D-F-NIC	15178270	21735008	0.698333
D-F-IC	17018714	24235010	0.702237
D-NF-NIC	22042940	32075582	0.687219
D-NF-IC	23659314	33548090	0.705236
E-F-NIC	18153454	25742968	0.705181
E-F-IC	16185422	22184176	0.729593
E-NF-NIC	15564994	22084760	0.704784
E-NF-IC	16578040	23175718	0.715319
F-F-NIC	20009322	28106868	0.711902
F-F-IC	28829730	40389794	0.713787
F-NF-NIC	26966848	38119116	0.707436
F-NF-IC	21338056	29776542	0.716606
G-F-NIC	17671998	25296064	0.698607
G-F-IC	24066712	33952234	0.70884
G-NF-NIC	16377778	23227056	0.705116
G-NF-IC	37626390	52607912	0.715223
H-F-NIC	18620354	26775432	0.695427
H-F-IC	14395524	28588698	0.503539
H-NF-NIC	19937468	28717856	0.694253
H-NF-IC	20184676	20407550	0.989079
A-F-NIC	14478242	20610550	0.702468
A-F-IC	17237504	24783718	0.695517
A-NF-NIC	18400862	26095434	0.705137
A-NF-IC	19481732	27657510	0.704392

## Sheet: b
Read	Alignment Title	eValue
cont3	XP_012525976.1: transmembrane channel-like protein 3 isoform X1 [Monomorium pharaonis]	7.46604e-145
cont4	XP_011877204.1: uncharacterized protein LOC105567181 isoform X2 [Vollenhovia emeryi]	0.000170863
cont5	XP_011167746.1: uncharacterized protein LOC105201439 [Solenopsis invicta]	4.79584e-55
cont8	XP_011171554.1: uncharacterized protein LOC105204196 [Solenopsis invicta]	4.1128e-78
cont9	XP_011171554.1: uncharacterized protein LOC105204196 [Solenopsis invicta]	2.18009e-91
cont12	XP_015591239.1: protein FAM50 homolog [Cephus cinctus]	1.29212e-06
cont13	XP_011157108.1: uncharacterized protein LOC105194077 [Solenopsis invicta]	2.2147e-20
cont16	XP_011871219.1: TBC1 domain family member 7 [Vollenhovia emeryi]	8.31505e-51
cont17	XP_011704367.1: antichymotrypsin-2-like isoform X10 [Wasmannia auropunctata]	0.0889211
cont20	XP_011694718.1: G patch domain and KOW motifs-containing protein [Wasmannia auropunctata]	7.05872e-146
cont22	XP_012055313.1: importin-5 [Atta cephalotes]	0.0
cont23	XP_011882962.1: male-enhanced antigen 1 [Vollenhovia emeryi]	1.06085e-13
cont24	XP_011863792.1: G-protein coupled receptor Mth2-like isoform X2 [Vollenhovia emeryi]	1.83689e-52
cont27	XP_011871993.1: serine protease HTRA2, mitochondrial-like isoform X2 [Vollenhovia emeryi]	2.03635e-134
cont28	XP_011165302.1: serine protease HTRA2, mitochondrial isoform X2 [Solenopsis invicta]	0.0
cont29	XP_011166450.1: translationally-controlled tumor protein homolog [Solenopsis invicta]	4.19831e-16
cont30	XP_011166450.1: translationally-controlled tumor protein homolog [Solenopsis invicta]	3.9806e-109
cont33	XP_011554271.1: uncharacterized protein LOC105385567 [Plutella xylostella]	2.52666e-14
cont36	XP_014473476.1: serine protease gd-like isoform X2 [Dinoponera quadriceps]	1.6781e-26
cont41	XP_011687315.1: iron-sulfur cluster co-chaperone protein HscB, mitochondrial [Wasmannia auropunctata]	3.02331e-114
cont42	XP_011687315.1: iron-sulfur cluster co-chaperone protein HscB, mitochondrial [Wasmannia auropunctata]	7.88625e-109
cont43	XP_011687315.1: iron-sulfur cluster co-chaperone protein HscB, mitochondrial [Wasmannia auropunctata]	6.45282e-146
cont44	XP_011056803.1: iron-sulfur cluster co-chaperone protein HscB, mitochondrial [Acromyrmex echinatior]	6.49049e-91
cont45	XP_012524143.1: protein cereblon isoform X2 [Monomorium pharaonis]	0.000230687
cont46	XP_011059905.1: leucine-rich repeats and immunoglobulin-like domains protein 1 [Acromyrmex echinatior]	1.1223e-18
cont48	XP_011175876.1: dynamin-like 120 kDa protein, mitochondrial isoform X3 [Solenopsis invicta]	0.0
cont49	XP_011065667.1: high affinity cationic amino acid transporter 1 isoform X2 [Acromyrmex echinatior]	0.0
cont50	XP_011687205.1: 2-oxoisovalerate dehydrogenase subunit alpha, mitochondrial [Wasmannia auropunctata]	0.0
cont51	XP_011871241.1: S-adenosylmethionine mitochondrial carrier protein-like [Vollenhovia emeryi]	5.34854e-132
cont52	XP_012063603.1: NEDD4 family-interacting protein 1-like [Atta cephalotes]	3.37618e-85
cont53	XP_012063603.1: NEDD4 family-interacting protein 1-like [Atta cephalotes]	2.01769e-08
cont54	XP_011865072.1: uncharacterized protein LOC105560510 isoform X1 [Vollenhovia emeryi]	5.96529e-09
cont55	XP_011702071.1: glutathione S-transferase-like isoform X1 [Wasmannia auropunctata]	3.00138e-117
cont56	XP_011702071.1: glutathione S-transferase-like isoform X1 [Wasmannia auropunctata]	3.16687e-75
cont57	XP_012217605.1: resistance to inhibitors of cholinesterase protein 3-like isoform X3 [Linepithema humile]	0.150772
cont59	XP_011686749.1: intracellular protein transport protein USO1-like isoform X1 [Wasmannia auropunctata]	0.0
cont60	XP_011858677.1: uncharacterized protein LOC105556203 isoform X2 [Vollenhovia emeryi]	2.68274e-66
cont61	XP_011858677.1: uncharacterized protein LOC105556203 isoform X2 [Vollenhovia emeryi]	9.16291e-66
cont62	XP_011704514.1: sulfhydryl oxidase 1 [Wasmannia auropunctata]	0.0
cont64	XP_014299943.1: uncharacterized protein LOC106694163, partial [Microplitis demolitor]	8.93014e-62
cont66	XP_012231821.1: probable cytochrome P450 6a13 [Linepithema humile]	3.92445e-53
cont67	XP_011704429.1: probable cytochrome P450 6a14 isoform X1 [Wasmannia auropunctata]	0.0
cont68	XP_011704430.1: cytochrome P450 6B7-like isoform X2 [Wasmannia auropunctata]	6.21519e-21
cont71	XP_012063100.1: uncharacterized protein LOC105626410 [Atta cephalotes]	0.0
cont72	XP_012541973.1: uncharacterized protein LOC105839895 [Monomorium pharaonis]	8.58153e-151
cont73	XP_011632124.1: group XV phospholipase A2-like isoform X1 [Pogonomyrmex barbatus]	0.0
cont74	XP_012144146.1: male-specific lethal 3 homolog isoform X3 [Megachile rotundata]	5.17852e-15
cont75	XP_012539857.1: pyrethroid hydrolase Ces2a [Monomorium pharaonis]	0.0
cont76	XP_004929732.1: uncharacterized protein LOC101735702 [Bombyx mori]	3.09546e-59
cont77	XP_012056788.1: integrator complex subunit 8 [Atta cephalotes]	0.0
cont78	XP_011869505.1: uncharacterized protein LOC105562929 isoform X1 [Vollenhovia emeryi]	0.0
cont80	XP_011706477.1: YEATS domain-containing protein 2 [Wasmannia auropunctata]	0.0
cont81	XP_011707042.1: uncharacterized protein LOC105462212, partial [Wasmannia auropunctata]	6.59645e-19
cont82	XP_011706765.1: uncharacterized protein LOC105461942 [Wasmannia auropunctata]	2.25654e-163
cont83	XP_011691593.1: longitudinals lacking protein, isoforms H/M/V isoform X1 [Wasmannia auropunctata]	3.38716e-91
cont86	YP_009115389.1| NADH dehydrogenase subunit 4 (mitochondrion) [Myrmica scabrinodis]	1.34777e-69
cont87	XP_011168587.1: ectonucleoside triphosphate diphosphohydrolase 5 isoform X2 [Solenopsis invicta]	4.40415e-80
cont89	XP_011867122.1: ectonucleoside triphosphate diphosphohydrolase 5 isoform X2 [Vollenhovia emeryi]	7.44211e-100
cont93	XP_015024448.1| uncharacterized protein Dvir_GJ16206, isoform D [Drosophila virilis]	0.142108
cont95	XP_012538133.1: protein germ cell-less [Monomorium pharaonis]	1.70434e-106
cont96	XP_011688429.1: fatty acyl-CoA reductase 1-like [Wasmannia auropunctata]	1.41823e-66
cont98	XP_011173198.1: uncharacterized protein LOC105205521 isoform X2 [Solenopsis invicta]	1.1311e-57
cont99	XP_011687974.1: box C/D snoRNA protein 1 [Wasmannia auropunctata]	2.9185e-11
cont100	XP_011164801.1: 40S ribosomal protein S7 [Solenopsis invicta]	4.11785e-68
cont102	XP_011170044.1: probable tRNA (guanine(26)-N(2))-dimethyltransferase [Solenopsis invicta]	0.0
cont103	XP_006824715.1: tubulin beta chain-like [Saccoglossus kowalevskii]	0.000155118
cont104	XP_011700656.1: kynurenine--oxoglutarate transaminase 3 isoform X1 [Wasmannia auropunctata]	0.0
cont105	XP_012524784.1: uncharacterized protein LOC105830158 isoform X3 [Monomorium pharaonis]	0.000450103
cont106	XP_012524784.1: uncharacterized protein LOC105830158 isoform X3 [Monomorium pharaonis]	0.00116672
cont107	XP_016844525.1: uncharacterized protein LOC103317374 [Nasonia vitripennis]	1.35549e-08
cont108	XP_011706732.1: cyclin-dependent kinase 10 [Wasmannia auropunctata]	0.0
cont109	XP_011872313.1: uncharacterized protein LOC105564506 [Vollenhovia emeryi]	0.0
cont112	XP_012524814.1: uncharacterized protein LOC105830182 isoform X1 [Monomorium pharaonis]	4.56362e-05
cont113	XP_011883033.1: AT-rich interactive domain-containing protein 2 isoform X4 [Vollenhovia emeryi]	5.35723e-151
cont116	XP_012233786.1: serine protease inhibitor 3/4-like isoform X12 [Linepithema humile]	8.96549e-06
cont117	XP_012059558.1: serine/threonine-protein kinase RIO3-like [Atta cephalotes]	1.53381e-28
cont118	XP_011051498.1: helicase domino [Acromyrmex echinatior]	1.245e-46
cont119	XP_011646477.1: putative tricarboxylate transport protein, mitochondrial [Pogonomyrmex barbatus]	2.92723e-35
cont120	XP_011170734.1: putative tricarboxylate transport protein, mitochondrial [Solenopsis invicta]	7.19028e-64
cont121	XP_011685663.1: uncharacterized protein LOC105448662 [Wasmannia auropunctata]	3.78317e-29
cont122	XP_011685466.1: LOW QUALITY PROTEIN: uncharacterized protein LOC105448518 [Wasmannia auropunctata]	0.0
cont123	XP_011172988.1: lateral signaling target protein 2 homolog, partial [Solenopsis invicta]	0.0
cont125	XP_011068588.1: exostosin-3 [Acromyrmex echinatior]	0.0
cont126	XP_004925343.1: stromal membrane-associated protein 1-like [Bombyx mori]	9.3644e-20
cont127	XP_011870616.1: heparan sulfate 2-O-sulfotransferase pipe [Vollenhovia emeryi]	0.0
cont129	XP_012063354.1: nuclear pore complex protein Nup107 [Atta cephalotes]	0.0
cont130	XP_012063354.1: nuclear pore complex protein Nup107 [Atta cephalotes]	0.0
cont131	XP_011067013.1: nuclear pore complex protein Nup107 [Acromyrmex echinatior]	1.50676e-170
cont132	XP_011688998.1: nuclear pore complex protein Nup107 isoform X1 [Wasmannia auropunctata]	0.0
cont133	XP_011689006.1: nuclear pore complex protein Nup107 isoform X2 [Wasmannia auropunctata]	3.75266e-69
cont134	XP_011688998.1: nuclear pore complex protein Nup107 isoform X1 [Wasmannia auropunctata]	0.0
cont135	XP_011865660.1: UDP-glucuronosyltransferase 2B20-like [Vollenhovia emeryi]	4.46023e-160
cont136	XP_011878634.1: uncharacterized protein LOC105567951 [Vollenhovia emeryi]	0.0
cont137	XP_011696671.1: uncharacterized protein LOC105455221 isoform X1 [Wasmannia auropunctata]	9.64045e-139
cont138	XP_011862129.1: kelch-like protein 5 [Vollenhovia emeryi]	5.64671e-39
cont139	XP_012542202.1: uncharacterized protein LOC105840029 isoform X1 [Monomorium pharaonis]	0.0
cont141	XP_012528527.1: breast cancer anti-estrogen resistance protein 1 isoform X1 [Monomorium pharaonis]	0.0
cont143	XP_011876203.1: PRA1 family protein 3 isoform X2 [Vollenhovia emeryi]	3.93949e-67
cont146	XP_011877685.1: A-kinase anchor protein 17A isoform X1 [Vollenhovia emeryi]	0.0
cont149	XP_012524487.1: uncharacterized protein LOC105829948 [Monomorium pharaonis]	1.38704e-08
cont151	XP_011687266.1: TBC1 domain family member 19 [Wasmannia auropunctata]	0.0
cont158	XP_008182083.1: uncharacterized protein K02A2.6-like [Acyrthosiphon pisum]	4.98868e-54
cont159	XP_015182496.1: uncharacterized protein LOC107069571 [Polistes dominula]	2.40384e-37
cont161	XP_011646077.1: protein phosphatase PHLPP-like protein [Pogonomyrmex barbatus]	4.7979e-128
cont165	XP_006613215.1: protein tweety-like [Apis dorsata]	8.54364e-56
cont167	XP_002159742.1: solute carrier family 2, facilitated glucose transporter member 8-like [Hydra vulgaris]	8.80992e-24
cont168	XP_011870379.1: testis-specific serine/threonine-protein kinase 1-like [Vollenhovia emeryi]	0.0
cont170	XP_011859300.1: zinc finger BED domain-containing protein 1-like [Vollenhovia emeryi]	1.32175e-40
cont172	XP_011068951.1: ATP-dependent RNA helicase vasa, isoform A [Acromyrmex echinatior]	2.47324e-06
cont176	XP_011859007.1: uncharacterized protein LOC105556520 [Vollenhovia emeryi]	7.75579e-83
cont177	XP_011873090.1: esterase FE4-like [Vollenhovia emeryi]	0.0
cont179	XP_011632364.1: uncharacterized protein LOC105424030 isoform X2 [Pogonomyrmex barbatus]	5.03987e-143
cont182	XP_011862334.1: uncharacterized protein LOC105558966 [Vollenhovia emeryi]	8.52037e-52
cont183	XP_011858362.1: uncharacterized protein K02A2.6-like [Vollenhovia emeryi]	2.28334e-19
cont187	XP_011861003.1: uncharacterized protein LOC105558094 [Vollenhovia emeryi]	2.04462e-87
cont189	XP_014232017.1: uncharacterized protein LOC106655921 [Trichogramma pretiosum]	1.68084e-108
cont193	XP_011881131.1: M-phase phosphoprotein 6 [Vollenhovia emeryi]	1.19258e-68
cont198	XP_011861718.1: uncharacterized protein LOC105558574 isoform X1 [Vollenhovia emeryi]	0.0783976
cont199	XP_012534471.1: uncharacterized protein LOC105835575 [Monomorium pharaonis]	2.56597e-08
cont200	XP_011880442.1: sorting nexin-13-like [Vollenhovia emeryi]	0.0
cont201	XP_011175606.1: methionine--tRNA ligase, cytoplasmic [Solenopsis invicta]	1.85925e-34
cont203	XP_011859191.1: uncharacterized protein LOC105556710 [Vollenhovia emeryi]	4.21893e-90
cont204	XP_011859426.1: uncharacterized protein LOC105556922 [Vollenhovia emeryi]	3.01528e-94
cont207	XP_011868202.1: uncharacterized protein LOC105562185 [Vollenhovia emeryi]	2.38714e-161
cont208	XP_015510071.1: uncharacterized protein LOC107217180 [Neodiprion lecontei]	0.0
cont209	XP_011696524.1: mucosa-associated lymphoid tissue lymphoma translocation protein 1-like [Wasmannia auropunctata]	0.0
cont210	XP_011696524.1: mucosa-associated lymphoid tissue lymphoma translocation protein 1-like [Wasmannia auropunctata]	0.0
cont211	XP_011872607.1: uncharacterized protein LOC105564672 [Vollenhovia emeryi]	0.00540078
cont213	XP_011875957.1: uncharacterized protein LOC105566506 [Vollenhovia emeryi]	2.56815e-95
cont214	XP_012059964.1: LOW QUALITY PROTEIN: fibrillin-1 [Atta cephalotes]	7.24703e-59
cont215	XP_014469859.1: serine/threonine-protein phosphatase alpha-2 isoform [Dinoponera quadriceps]	0.0
cont216	XP_011869446.1: uncharacterized protein LOC105562895 isoform X2 [Vollenhovia emeryi]	4.66206e-79
cont217	XP_011869445.1: uncharacterized protein LOC105562895 isoform X1 [Vollenhovia emeryi]	4.63288e-74
cont218	XP_011643661.1: ubiquitin carboxyl-terminal hydrolase 48-like isoform X2 [Pogonomyrmex barbatus]	4.72112e-146
cont219	XP_011639770.1: multiple epidermal growth factor-like domains protein 10 isoform X3 [Pogonomyrmex barbatus]	1.18058e-83
cont221	XP_011687574.1: uncharacterized protein LOC105449855 [Wasmannia auropunctata]	1.23409e-68
cont223	XP_011871117.1: uncharacterized protein LOC105563808 [Vollenhovia emeryi]	3.10298e-99
cont225	XP_011684293.1: uncharacterized protein LOC105447785 [Wasmannia auropunctata]	2.21941e-90
cont229	XP_011858091.1: uncharacterized protein LOC105555675 [Vollenhovia emeryi]	8.73218e-55
cont230	XP_011566779.1: L-idonate 5-dehydrogenase-like [Plutella xylostella]	2.66665e-35
cont231	XP_011873886.1: cytochrome P450 9e2-like [Vollenhovia emeryi]	9.80764e-82
cont234	NP_001155502.1| adenine nucleotide translocator-like [Acyrthosiphon pisum]	0.0
cont236	XP_011872251.1: hemicentin-1-like isoform X2 [Vollenhovia emeryi]	0.0
cont239	XP_011882861.1: sodium/hydrogen exchanger 3 [Vollenhovia emeryi]	0.0740794
cont241	XP_011688540.1: maternal protein pumilio-like [Wasmannia auropunctata]	1.59957e-35
cont242	XP_011703887.1: metallophosphoesterase domain-containing protein 1 isoform X2 [Wasmannia auropunctata]	0.0
cont243	XP_012529250.1: uncharacterized protein LOC105832655 [Monomorium pharaonis]	2.20383e-17
cont247	XP_011565648.1: lysine-specific permease-like [Plutella xylostella]	1.52287e-86
cont248	XP_012538337.1: uncharacterized protein CG4449 isoform X1 [Monomorium pharaonis]	5.30477e-112
cont252	XP_012056841.1: thymidylate kinase [Atta cephalotes]	6.07296e-126
cont253	XP_008556187.1: protein furry isoform X2 [Microplitis demolitor]	7.11458e-37
cont254	XP_011706697.1: UDP-glucuronosyltransferase 2B17-like [Wasmannia auropunctata]	0.0506391
cont255	XP_011860422.1: decaprenyl-diphosphate synthase subunit 2-like [Vollenhovia emeryi]	0.0
cont257	XP_012539318.1: zinc finger CCCH domain-containing protein 13-like [Monomorium pharaonis]	5.00699e-34
cont258	XP_011865355.1: E3 ubiquitin-protein ligase RBBP6 isoform X1 [Vollenhovia emeryi]	1.05748e-93
cont260	XP_011882032.1: acidic leucine-rich nuclear phosphoprotein 32 family member A [Vollenhovia emeryi]	5.60119e-56
cont263	XP_011858816.1: uncharacterized protein LOC105556342 [Vollenhovia emeryi]	2.33922e-12
cont265	XP_012523193.1: neuronal PAS domain-containing protein 4-like, partial [Monomorium pharaonis]	9.51779e-143
cont267	XP_012220326.1: atrial natriuretic peptide receptor 1 isoform X1 [Linepithema humile]	9.76678e-06
cont269	XP_011634799.1: uncharacterized protein LOC105425640 [Pogonomyrmex barbatus]	3.30233e-20
cont273	XP_011067098.1: LOW QUALITY PROTEIN: protein glass-like [Acromyrmex echinatior]	1.53483e-54
cont275	XP_011701331.1: protein asteroid homolog 1-like [Wasmannia auropunctata]	0.0
cont277	XP_011062703.1: mitogen-activated protein kinase kinase kinase 7-like [Acromyrmex echinatior]	0.0
cont278	XP_011636122.1: G-protein coupled receptor Mth2-like isoform X3 [Pogonomyrmex barbatus]	1.42696e-31
cont283	XP_011058986.1: aminopeptidase N-like isoform X1 [Acromyrmex echinatior]	9.73306e-21
cont284	XP_011693836.1: thymidylate synthase [Wasmannia auropunctata]	0.0
cont285	XP_011567019.1: acetyl-CoA hydrolase-like [Plutella xylostella]	2.81578e-20
cont287	XP_012150804.1: F-box only protein 32 isoform X2 [Megachile rotundata]	1.15556e-12
cont291	XP_017100624.1: CDK5RAP1-like protein [Drosophila bipectinata]	5.33923e-38
cont292	XP_011876812.1: podocan-like [Vollenhovia emeryi]	1.43566e-89
cont295	XP_011175210.1: RING finger protein 207-like isoform X2 [Solenopsis invicta]	0.0
cont296	XP_011863301.1: CD109 antigen-like isoform X1 [Vollenhovia emeryi]	1.69159e-11
cont297	XP_011698665.1: uncharacterized protein LOC105456147 isoform X1 [Wasmannia auropunctata]	5.93971e-56
cont302	XP_012543350.1: RWD domain-containing protein 4 [Monomorium pharaonis]	4.48687e-100
cont303	XP_015587254.1: 14-3-3 protein zeta isoform X2 [Cephus cinctus]	1.68785e-82
cont304	XP_011882308.1: uncharacterized protein LOC105570011 [Vollenhovia emeryi]	2.01087e-13
cont305	XP_011706241.1: BTB/POZ and MATH domain-containing protein 5-like isoform X3 [Wasmannia auropunctata]	4.96855e-52
cont306	XP_011695746.1: speckle-type POZ protein-like isoform X2 [Wasmannia auropunctata]	9.05246e-107
cont309	XP_011634654.1: uncharacterized protein LOC105425531 isoform X2 [Pogonomyrmex barbatus]	0.0
cont311	XP_011634654.1: uncharacterized protein LOC105425531 isoform X2 [Pogonomyrmex barbatus]	0.0
cont312	XP_012057410.1: SRR1-like protein [Atta cephalotes]	9.11492e-137
cont314	XP_008557357.1: uncharacterized protein LOC103578156 isoform X1 [Microplitis demolitor]	1.84693e-48
cont315	XP_011867259.1: actin cytoskeleton-regulatory complex protein PAN1 isoform X2 [Vollenhovia emeryi]	4.67988e-06
cont316	XP_011867259.1: actin cytoskeleton-regulatory complex protein PAN1 isoform X2 [Vollenhovia emeryi]	0.000106502
cont317	XP_014488946.1: cuticle protein 16.5, isoform B-like [Dinoponera quadriceps]	8.99514e-28
cont318	XP_009065734.1| hypothetical protein LOTGIDRAFT_146480, partial [Lottia gigantea]	2.58031e-15
cont320	XP_011873621.1: uncharacterized protein LOC105565222 isoform X1 [Vollenhovia emeryi]	7.57376e-89
cont321	XP_011866262.1: uncharacterized protein LOC105561140 isoform X2 [Vollenhovia emeryi]	8.24234e-166
cont322	XP_011692613.1: G2/mitotic-specific cyclin-B isoform X1 [Wasmannia auropunctata]	0.0
cont324	XP_011633257.1: extensin-like isoform X2 [Pogonomyrmex barbatus]	1.50858e-05
cont327	XP_011688810.1: vesicle-fusing ATPase 1-like [Wasmannia auropunctata]	0.0
cont328	XP_011068316.1: vesicle-fusing ATPase 1-like [Acromyrmex echinatior]	4.9418e-20
cont329	XP_011860077.1: aminopeptidase N-like, partial [Vollenhovia emeryi]	0.262081
cont335	XP_012543693.1: cytochrome P450 4C1-like, partial [Monomorium pharaonis]	1.11229e-20
cont336	XP_011873886.1: cytochrome P450 9e2-like [Vollenhovia emeryi]	0.0
cont337	XP_011873886.1: cytochrome P450 9e2-like [Vollenhovia emeryi]	5.07047e-146
cont340	XP_011882045.1: uncharacterized protein LOC105569870 isoform X2 [Vollenhovia emeryi]	3.56229e-143
cont341	XP_011864291.1: chitinase domain-containing protein 1 isoform X1 [Vollenhovia emeryi]	0.0
cont342	XP_011864291.1: chitinase domain-containing protein 1 isoform X1 [Vollenhovia emeryi]	0.0
cont343	XP_011877259.1: uncharacterized protein F13E9.13, mitochondrial [Vollenhovia emeryi]	1.05192e-08
cont347	XP_011861541.1: uncharacterized protein LOC105558453 [Vollenhovia emeryi]	1.24308e-157
cont348	XP_011644626.1: myb-like protein AA isoform X2 [Pogonomyrmex barbatus]	2.84564e-09
cont351	XP_012056258.1: zinc metalloproteinase nas-37-like [Atta cephalotes]	2.54742e-62
cont352	XP_011879837.1: peptidylprolyl isomerase domain and WD repeat-containing protein 1 [Vollenhovia emeryi]	0.0
cont355	XP_011877976.1: homeobox protein Nkx-2.5-like [Vollenhovia emeryi]	0.0
cont356	XP_017085653.1: low-affinity inorganic phosphate transporter 1-like [Drosophila eugracilis]	8.54304e-09
cont357	XP_011869954.1: uncharacterized protein LOC105563185 [Vollenhovia emeryi]	7.62609e-50
cont362	XP_014475432.1: uncharacterized protein LOC106744850 [Dinoponera quadriceps]	1.68607e-57
cont363	XP_011172715.1: A disintegrin and metalloproteinase with thrombospondin motifs 9 isoform X3 [Solenopsis invicta]	6.61057e-06
cont367	XP_008188773.1: major myo-inositol transporter IolT-like, partial [Acyrthosiphon pisum]	5.05771e-29
cont369	XP_012246089.1: phosphoglucomutase-like [Bombus impatiens]	1.158e-20
cont372	XP_015903718.1: 60S ribosomal protein L27-like [Parasteatoda tepidariorum]	2.01105e-44
cont373	XP_011860757.1: uncharacterized protein LOC105557945 [Vollenhovia emeryi]	2.07289e-07
cont377	XP_011158394.1: RNA-binding protein 40 [Solenopsis invicta]	0.0
cont383	XP_009030137.1| hypothetical protein HELRODRAFT_70460, partial [Helobdella robusta]	1.39816e-07
cont384	XP_012235832.1: ral GTPase-activating protein subunit alpha-1 isoform X7 [Linepithema humile]	0.00269785
cont387	XP_016843032.1: uncharacterized protein LOC107981521 [Nasonia vitripennis]	1.68962e-15
cont388	XP_011162594.1: apolipoprotein D-like [Solenopsis invicta]	1.60135e-09
cont389	XP_012540116.1: thrombospondin type-1 domain-containing protein 4-like [Monomorium pharaonis]	7.43002e-18
cont390	XP_011645502.1: uncharacterized protein LOC105432400 isoform X1 [Pogonomyrmex barbatus]	2.88408e-10
cont394	XP_011703950.1: retinol dehydrogenase 12-like [Wasmannia auropunctata]	1.03062e-124
cont400	XP_014261149.1: isochorismate synthase EntC-like [Cimex lectularius]	2.36836e-16
cont402	XP_012541468.1: cingulin [Monomorium pharaonis]	1.14389e-13
cont403	XP_016996425.1: putative peptide import ATP-binding protein BruAb2_1033, partial [Drosophila takahashii]	7.8873e-32
cont406	XP_011866867.1: uncharacterized protein LOC105561471 [Vollenhovia emeryi]	7.50263e-35
cont408	XP_012542734.1: uncharacterized protein LOC105840366 [Monomorium pharaonis]	1.97274e-07
cont410	XP_011863175.1: uncharacterized protein LOC105559478 isoform X1 [Vollenhovia emeryi]	0.0
cont412	XP_011877749.1: multidrug resistance-associated protein 4-like isoform X1 [Vollenhovia emeryi]	0.0
cont413	XP_016922218.1: afadin-like [Apis cerana]	1.2885e-05
cont415	XP_011696351.1: uncharacterized protein LOC105455018 isoform X4 [Wasmannia auropunctata]	7.22316e-15
cont418	XP_011880696.1: uncharacterized protein LOC105569115 [Vollenhovia emeryi]	4.37858e-45
cont424	XP_012530895.1: transcription factor Sp9 [Monomorium pharaonis]	7.20609e-125
cont426	XP_014244734.1: ankyrin-3-like isoform X16 [Cimex lectularius]	0.0113912
cont427	XP_011689411.1: uncharacterized protein LOC105450962 [Wasmannia auropunctata]	1.65857e-16
cont433	XP_011052030.1: uncharacterized protein LOC105144674 [Acromyrmex echinatior]	2.54209e-65
cont437	XP_012534207.1: uncharacterized protein LOC105835450 [Monomorium pharaonis]	0.0
cont438	XP_011065392.1: major royal jelly protein 1-like [Acromyrmex echinatior]	7.6431e-169
cont439	XP_012527109.1: hypermethylated in cancer 2 protein isoform X2 [Monomorium pharaonis]	0.0
cont446	XP_011068584.1: cilia- and flagella-associated protein 20-like [Acromyrmex echinatior]	4.67543e-85
cont449	XP_011173883.1: mitogen-activated protein kinase-binding protein 1 [Solenopsis invicta]	0.0
cont451	XP_011695707.1: zinc finger and BTB domain-containing protein 49-like [Wasmannia auropunctata]	4.55634e-30
cont453	XP_011868748.1: protein FAM102A isoform X3 [Vollenhovia emeryi]	1.94519e-105
cont454	XP_011866326.1: aldehyde dehydrogenase, mitochondrial [Vollenhovia emeryi]	5.31566e-134
cont455	XP_011639712.1: F-box/WD repeat-containing protein 9-like isoform X2 [Pogonomyrmex barbatus]	1.39933e-68
cont456	XP_011163784.1: acylphosphatase-2 [Solenopsis invicta]	2.11446e-66
cont458	XP_015928110.1: uncharacterized protein LOC107455155 [Parasteatoda tepidariorum]	9.86684e-05
cont460	XP_011169829.1: pre-mRNA-processing factor 6 [Solenopsis invicta]	7.44789e-141
cont462	XP_012531689.1: chromobox protein homolog 3-like [Monomorium pharaonis]	1.2799e-131
cont467	XP_012062377.1: mushroom body large-type Kenyon cell-specific protein 1 [Atta cephalotes]	1.31526e-102
cont468	XP_011864857.1: virulence protein SSD1-like isoform X1 [Vollenhovia emeryi]	2.10374e-65
cont469	XP_011058120.1: prisilkin-39-like isoform X2 [Acromyrmex echinatior]	4.16845e-08
cont470	XP_011058119.1: putative GPI-anchored protein PB15E9.01c isoform X1 [Acromyrmex echinatior]	1.40779e-51
cont471	XP_011861991.1: rho GTPase-activating protein 18 isoform X2 [Vollenhovia emeryi]	0.0
cont472	XP_011861991.1: rho GTPase-activating protein 18 isoform X2 [Vollenhovia emeryi]	0.0
cont473	XP_011861991.1: rho GTPase-activating protein 18 isoform X2 [Vollenhovia emeryi]	0.0
cont474	XP_011861990.1: rho GTPase-activating protein 18 isoform X1 [Vollenhovia emeryi]	1.26006e-78
cont475	XP_011058285.1: tyrosine-protein phosphatase Lar-like isoform X2 [Acromyrmex echinatior]	7.80407e-132
cont476	XP_011867108.1: protein angel homolog 2 isoform X1 [Vollenhovia emeryi]	0.0
cont477	XP_011168581.1: protein angel isoform X2 [Solenopsis invicta]	9.86204e-69
cont478	XP_011708252.1: protein angel isoform X3 [Wasmannia auropunctata]	4.67529e-97
cont479	XP_011867685.1: organic cation transporter protein-like isoform X1 [Vollenhovia emeryi]	0.0
cont480	XP_011867685.1: organic cation transporter protein-like isoform X1 [Vollenhovia emeryi]	0.0
cont481	XP_011877814.1: GTP:AMP phosphotransferase AK3, mitochondrial [Vollenhovia emeryi]	2.11655e-30
cont482	XP_011051871.1: GTP:AMP phosphotransferase AK3, mitochondrial [Acromyrmex echinatior]	1.40829e-06
cont483	XP_011051093.1: uncharacterized protein LOC105144094 isoform X1 [Acromyrmex echinatior]	5.6391e-138
cont484	XP_011160433.1: dihydrolipoyllysine-residue succinyltransferase component of 2-oxoglutarate dehydrogenase complex, mitochondrial [Solenopsis invicta]	0.0
cont485	XP_011160960.1: 72 kDa inositol polyphosphate 5-phosphatase isoform X1 [Solenopsis invicta]	0.0
cont486	XP_011874358.1: 72 kDa inositol polyphosphate 5-phosphatase isoform X4 [Vollenhovia emeryi]	0.0
cont490	XP_011880551.1: uncharacterized protein LOC105569031 [Vollenhovia emeryi]	0.0
cont491	XP_011164910.1: ras-like protein 2 [Solenopsis invicta]	1.10658e-12
cont494	XP_012530245.1: signal recognition particle 54 kDa protein [Monomorium pharaonis]	0.0
cont495	XP_014489271.1: signal recognition particle 54 kDa protein [Dinoponera quadriceps]	8.01901e-61
cont496	XP_011054107.1: uncharacterized protein LOC105145906 [Acromyrmex echinatior]	3.32441e-107
cont497	XP_011174480.1: putative nuclease HARBI1 [Solenopsis invicta]	1.15759e-81
cont498	XP_011161135.1: ribosome biogenesis protein BRX1 homolog [Solenopsis invicta]	6.68377e-87
cont499	XP_017038459.1: uncharacterized protein LOC108086122 [Drosophila kikkawai]	1.06833e-26
cont500	XP_017038459.1: uncharacterized protein LOC108086122 [Drosophila kikkawai]	1.02132e-26
cont501	XP_011644077.1: lipopolysaccharide-induced tumor necrosis factor-alpha factor homolog [Pogonomyrmex barbatus]	1.23929e-23
cont502	XP_011883740.1: LOW QUALITY PROTEIN: uncharacterized protein LOC105570897 [Vollenhovia emeryi]	0.0
cont505	XP_011167382.1: pleckstrin homology domain-containing family F member 2 [Solenopsis invicta]	1.83989e-56
cont506	XP_011640766.1: KH domain-containing protein C56G2.1 [Pogonomyrmex barbatus]	1.97217e-46
cont507	XP_012524688.1: A-kinase anchor protein 1, mitochondrial [Monomorium pharaonis]	6.59714e-11
cont508	XP_011858335.1: male-specific lethal 3 homolog isoform X4 [Vollenhovia emeryi]	0.0
cont509	XP_014484188.1: splicing factor 3B subunit 6-like protein [Dinoponera quadriceps]	1.31275e-74
cont511	XP_011861150.1: uncharacterized protein LOC105558196 [Vollenhovia emeryi]	4.56061e-31
cont512	XP_011687042.1: xaa-Pro dipeptidase-like [Wasmannia auropunctata]	3.56327e-36
cont513	XP_011069276.1: LOW QUALITY PROTEIN: E3 SUMO-protein ligase RanBP2-like [Acromyrmex echinatior]	0.0
cont516	XP_011062107.1: uncharacterized protein LOC105150599 [Acromyrmex echinatior]	1.56015e-60
cont517	XP_011868278.1: uncharacterized protein LOC105562223 isoform X2 [Vollenhovia emeryi]	1.02055e-17
cont518	XP_011871535.1: anaphase-promoting complex subunit 4 [Vollenhovia emeryi]	0.0
cont522	XP_011862083.1: stress-activated protein kinase JNK [Vollenhovia emeryi]	1.49292e-12
cont523	XP_012248298.1: ATP-dependent Clp protease proteolytic subunit 2, mitochondrial-like [Bombus impatiens]	1.08571e-50
cont524	XP_011155400.1: uncharacterized protein LOC105192842 [Solenopsis invicta]	0.413571
cont527	XP_015177545.1: leukotriene A-4 hydrolase [Polistes dominula]	9.37738e-31
cont529	XP_008196658.1: ATP-dependent 6-phosphofructokinase isoform X2 [Tribolium castaneum]	2.5714e-55
cont530	XP_011869272.1: gephyrin-like isoform X1 [Vollenhovia emeryi]	9.26846e-39
cont531	XP_011869272.1: gephyrin-like isoform X1 [Vollenhovia emeryi]	1.66679e-19
cont532	XP_014487323.1: 60S ribosomal protein L32 [Dinoponera quadriceps]	9.51299e-62
cont533	XP_011174726.1: uncharacterized protein LOC105206976, partial [Solenopsis invicta]	5.69973e-13
cont535	XP_011156517.1: methionine aminopeptidase 1 [Solenopsis invicta]	9.23695e-94
cont536	XP_013085560.1: probable beta-D-xylosidase 7 [Biomphalaria glabrata]	1.25385e-34
cont538	XP_011707280.1: synaptic vesicular amine transporter [Wasmannia auropunctata]	6.31006e-18
cont540	XP_011173928.1: uncharacterized protein LOC105206099 [Solenopsis invicta]	0.00264159
cont541	XP_012530405.1: uncharacterized protein LOC105833308, partial [Monomorium pharaonis]	6.41376e-106
cont542	XP_011699463.1: uncharacterized protein LOC105456838, partial [Wasmannia auropunctata]	9.22928e-30
cont543	XP_011859757.1: GDP-D-glucose phosphorylase 1 [Vollenhovia emeryi]	1.11609e-90
cont544	XP_011859757.1: GDP-D-glucose phosphorylase 1 [Vollenhovia emeryi]	1.72582e-67
cont545	XP_011685304.1: uncharacterized protein LOC105448453 [Wasmannia auropunctata]	1.43906e-135
cont546	XP_014482703.1: zinc finger protein 497-like isoform X1 [Dinoponera quadriceps]	2.04921e-25
cont547	XP_011859426.1: uncharacterized protein LOC105556922 [Vollenhovia emeryi]	0.0
cont549	XP_014483582.1: myosin regulatory light chain sqh [Dinoponera quadriceps]	1.26403e-96
cont551	XP_014678020.1: salicylate carboxymethyltransferase-like [Priapulus caudatus]	1.99666e-09
cont553	XP_011860252.1: uncharacterized protein K02A2.6-like, partial [Vollenhovia emeryi]	2.22497e-11
cont560	XP_011707594.1: CD151 antigen-like [Wasmannia auropunctata]	2.85111e-157
cont561	XP_012230596.1: G1/S-specific cyclin-D2 [Linepithema humile]	0.114196
cont562	XP_012056173.1: G1/S-specific cyclin-D2 [Atta cephalotes]	7.60464e-129
cont563	XP_011882082.1: glutenin, low molecular weight subunit-like isoform X2 [Vollenhovia emeryi]	0.0199652
cont564	XP_012249767.1: PDZ and LIM domain protein Zasp-like isoform X6 [Bombus impatiens]	1.09708e-33
cont565	XP_011874195.1: ETS-like protein pointed, isoform P1 isoform X2 [Vollenhovia emeryi]	0.0
cont566	XP_012062241.1: FK506-binding protein 59, partial [Atta cephalotes]	2.34471e-22
cont567	XP_011692862.1: FK506-binding protein 59 isoform X2 [Wasmannia auropunctata]	0.0
cont568	XP_011860451.1: uncharacterized protein LOC105557743 [Vollenhovia emeryi]	0.00336386
cont569	XP_012059767.1: serine/threonine-protein phosphatase 4 catalytic subunit, partial [Atta cephalotes]	6.37645e-63
cont570	XP_011862550.1: uncharacterized protein LOC105559100 [Vollenhovia emeryi]	0.0
cont571	XP_011646578.1: putative protein FAM10A4 [Pogonomyrmex barbatus]	5.08919e-125
cont572	XP_011882433.1: uncharacterized protein LOC105570082, partial [Vollenhovia emeryi]	1.34185e-43
cont573	XP_011690559.1: high mobility group protein HMGI-C [Wasmannia auropunctata]	0.000139303
cont574	XP_011879678.1: optineurin [Vollenhovia emeryi]	0.000513774
cont575	XP_011685082.1: zinc-regulated protein 8-like [Wasmannia auropunctata]	0.0
cont576	XP_011636427.1: protein vav isoform X2 [Pogonomyrmex barbatus]	1.55675e-64
cont577	XP_011870124.1: aminopeptidase N [Vollenhovia emeryi]	0.0
cont578	XP_011870124.1: aminopeptidase N [Vollenhovia emeryi]	0.0
cont579	XP_011874298.1: NAD-dependent protein deacetylase sirtuin-7 [Vollenhovia emeryi]	0.0
cont580	XP_015190505.1: NAD-dependent protein deacetylase sirtuin-7 [Polistes dominula]	1.9663e-11
cont581	XP_012539470.1: titin [Monomorium pharaonis]	5.29426e-06
cont582	XP_014469512.1: uncharacterized protein LOC106741744 [Dinoponera quadriceps]	4.29221e-155
cont584	XP_011869582.1: uncharacterized protein LOC105562976 [Vollenhovia emeryi]	4.39246e-82
cont586	XP_012525103.1: apoptotic protease-activating factor 1 isoform X1 [Monomorium pharaonis]	0.0
cont587	XP_012525103.1: apoptotic protease-activating factor 1 isoform X1 [Monomorium pharaonis]	0.0
cont588	XP_011061313.1: patj homolog isoform X2 [Acromyrmex echinatior]	0.0
cont589	XP_006613051.1: patj homolog, partial [Apis dorsata]	7.4176e-165
cont590	XP_011874645.1: epidermal growth factor receptor substrate 15-like 1 isoform X6 [Vollenhovia emeryi]	1.46888e-62
cont591	XP_012527885.1: decaprenyl-diphosphate synthase subunit 1-like, partial [Monomorium pharaonis]	1.59864e-25
cont594	XP_011174559.1: uncharacterized protein LOC105206790, partial [Solenopsis invicta]	7.56424e-59
cont596	XP_011173084.1: lysophospholipid acyltransferase 1-like [Solenopsis invicta]	4.90574e-06
cont597	XP_012532060.1: TGF-beta receptor type-1 isoform X4 [Monomorium pharaonis]	1.82274e-79
cont598	XP_012532060.1: TGF-beta receptor type-1 isoform X4 [Monomorium pharaonis]	1.21355e-21
cont599	XP_011692082.1: TGF-beta receptor type-1 isoform X3 [Wasmannia auropunctata]	2.09298e-15
cont600	XP_012063930.1: arginine--tRNA ligase, cytoplasmic [Atta cephalotes]	0.00159549
cont601	XP_011049683.1: uncharacterized protein LOC105143222 [Acromyrmex echinatior]	2.10158e-23
cont603	XP_011635891.1: ubiquitin carboxyl-terminal hydrolase 36 [Pogonomyrmex barbatus]	0.0
cont604	XP_011701221.1: uncharacterized protein LOC105457945 [Wasmannia auropunctata]	3.61888e-94
cont605	XP_003424261.1: acidic phospholipase A2 PA4 isoform X2 [Nasonia vitripennis]	1.26905e-09
cont607	XP_011704580.1: E3 UFM1-protein ligase 1 homolog [Wasmannia auropunctata]	9.28552e-139
cont608	XP_014790039.1: polygalacturonase-like, partial [Octopus bimaculoides]	7.74e-121
cont610	XP_011875391.1: ecdysone-inducible protein E75 isoform X6 [Vollenhovia emeryi]	3.78392e-19
cont611	XP_012523389.1: integrator complex subunit 12-like isoform X3 [Monomorium pharaonis]	1.17703e-129
cont612	XP_011056968.1: protein BCL9 homolog isoform X2 [Acromyrmex echinatior]	0.0
cont613	XP_011874463.1: multiple inositol polyphosphate phosphatase 1 isoform X1 [Vollenhovia emeryi]	0.0
cont614	XP_011881906.1: uncharacterized protein LOC105569786 [Vollenhovia emeryi]	1.24347e-117
cont615	XP_012215258.1: IQ motif and SEC7 domain-containing protein 1 isoform X4 [Linepithema humile]	5.83723e-17
cont616	XP_011880162.1: spatacsin isoform X1 [Vollenhovia emeryi]	0.0
cont617	XP_011880162.1: spatacsin isoform X1 [Vollenhovia emeryi]	0.0
cont618	XP_011874515.1: probable DNA mismatch repair protein Msh6 [Vollenhovia emeryi]	0.0
cont619	XP_011051852.1: failed axon connections isoform X1 [Acromyrmex echinatior]	0.0
cont620	XP_011861810.1: acetyl-coenzyme A synthetase [Vollenhovia emeryi]	3.1334e-06
cont622	XP_011876820.1: probable chitinase 3 [Vollenhovia emeryi]	0.0
cont625	XP_011861169.1: mitogen-activated protein kinase-binding protein 1 isoform X4 [Vollenhovia emeryi]	6.7434e-154
cont626	XP_011861169.1: mitogen-activated protein kinase-binding protein 1 isoform X4 [Vollenhovia emeryi]	0.0
cont627	XP_011870856.1: beta-1,4-glucuronyltransferase 1 [Vollenhovia emeryi]	1.58117e-80
cont628	XP_011050843.1: uncharacterized protein LOC105143938 [Acromyrmex echinatior]	2.30185e-130
cont629	XP_014472302.1: uncharacterized protein LOC106743199 [Dinoponera quadriceps]	0.0601736
cont630	XP_011050843.1: uncharacterized protein LOC105143938 [Acromyrmex echinatior]	7.51633e-36
cont631	XP_012539035.1: beta-arrestin-2 isoform X4 [Monomorium pharaonis]	0.0
cont632	XP_012539035.1: beta-arrestin-2 isoform X4 [Monomorium pharaonis]	0.0
cont635	XP_016909411.1: guanine nucleotide-binding protein G(s) subunit alpha [Apis cerana]	0.000927773
cont638	XP_011166637.1: H/ACA ribonucleoprotein complex non-core subunit NAF1 [Solenopsis invicta]	1.64991e-120
cont639	XP_012057640.1: H/ACA ribonucleoprotein complex non-core subunit NAF1 [Atta cephalotes]	1.06562e-103
cont640	XP_012529434.1: H/ACA ribonucleoprotein complex non-core subunit NAF1 [Monomorium pharaonis]	1.81846e-118
cont641	XP_011166637.1: H/ACA ribonucleoprotein complex non-core subunit NAF1 [Solenopsis invicta]	7.94317e-125
cont642	XP_011644839.1: kazrin isoform X3 [Pogonomyrmex barbatus]	0.0
cont644	XP_011161191.1: uncharacterized protein LOC105196784 [Solenopsis invicta]	0.000305804
cont645	XP_011059101.1: uncharacterized protein LOC105148838 isoform X10 [Acromyrmex echinatior]	1.55301e-27
cont646	XP_011859007.1: uncharacterized protein LOC105556520 [Vollenhovia emeryi]	2.70142e-57
cont647	XP_011859007.1: uncharacterized protein LOC105556520 [Vollenhovia emeryi]	0.0
cont648	XP_011175888.1: DNA-binding protein RFX2 isoform X5 [Solenopsis invicta]	1.39001e-17
cont649	XP_015437900.1: uncharacterized protein K02A2.6-like, partial [Dufourea novaeangliae]	1.56681e-24
cont650	XP_011692219.1: uncharacterized protein LOC105452633 isoform X2 [Wasmannia auropunctata]	0.0
cont653	XP_011883840.1: uncharacterized protein LOC105570988 [Vollenhovia emeryi]	6.29475e-10
cont655	XP_011692312.1: protein FAM135A isoform X3 [Wasmannia auropunctata]	2.65014e-155
cont657	XP_012349427.1: uncharacterized protein LOC105736981 [Apis florea]	0.000406121
cont658	XP_015905980.1: uncharacterized protein LOC107438259 [Parasteatoda tepidariorum]	2.8674e-15
cont659	XP_011871562.1: uncharacterized protein LOC105564069 [Vollenhovia emeryi]	0.00269804
cont662	XP_011169823.1: UDP-glucuronosyltransferase 2B1-like [Solenopsis invicta]	4.03905e-80
cont663	XP_011173673.1: probable RNA methyltransferase bin3 [Solenopsis invicta]	0.0
cont664	XP_012522537.1: uncharacterized protein LOC105828627 [Monomorium pharaonis]	2.03607e-166
cont665	XP_011875790.1: serine protease gd-like isoform X2 [Vollenhovia emeryi]	5.72044e-41
cont667	XP_012529194.1: uncharacterized protein LOC105832622 [Monomorium pharaonis]	9.87e-43
cont671	XP_011055891.1: uncharacterized protein LOC105146936 [Acromyrmex echinatior]	0.0
cont674	XP_012231581.1: putative succinate dehydrogenase [ubiquinone] cytochrome b small subunit, mitochondrial [Linepithema humile]	3.35313e-31
cont677	XP_012058089.1: protein deadpan [Atta cephalotes]	1.14767e-58
cont680	XP_011883117.1: tubulin-specific chaperone A [Vollenhovia emeryi]	2.49247e-31
cont684	XP_012231267.1: 60S ribosomal protein L8 [Linepithema humile]	3.48963e-50
cont685	XP_012055185.1: kinesin-related protein 4-like [Atta cephalotes]	0.0
cont686	XP_011874044.1: uncharacterized protein LOC105565444 [Vollenhovia emeryi]	0.0
cont687	XP_012533031.1: regulating synaptic membrane exocytosis protein 2 isoform X1 [Monomorium pharaonis]	0.0
cont688	XP_011647234.1: regulating synaptic membrane exocytosis protein 2 [Pogonomyrmex barbatus]	0.0929312
cont689	XP_011878497.1: ATP-binding cassette sub-family G member 4 isoform X1 [Vollenhovia emeryi]	0.0578563
cont690	XP_011869217.1: manganese-transporting ATPase 13A1 [Vollenhovia emeryi]	0.0
cont691	XP_011053629.1: serine/threonine-protein kinase 17B-like isoform X2 [Acromyrmex echinatior]	2.1271e-160
cont692	XP_011304315.1: uncharacterized protein LOC105267279 isoform X2 [Fopius arisanus]	1.86369e-22
cont695	XP_011691305.1: alkaline phosphatase-like [Wasmannia auropunctata]	0.0
cont696	XP_011873041.1: adenylyl cyclase-associated protein 1 [Vollenhovia emeryi]	2.6415e-13
cont697	XP_011689137.1: gamma-tubulin complex component 6-like [Wasmannia auropunctata]	0.0
cont698	XP_012529444.1: probable ATP-dependent RNA helicase DHX34 [Monomorium pharaonis]	0.0
cont699	XP_011873858.1: rotatin isoform X2 [Vollenhovia emeryi]	0.0
cont700	XP_011692571.1: uncharacterized protein LOC105452816 [Wasmannia auropunctata]	0.0
cont701	XP_011867804.1: uncharacterized protein LOC105561979 isoform X1 [Vollenhovia emeryi]	2.93019e-70
cont706	XP_011692531.1: uncharacterized protein LOC105452799 isoform X1 [Wasmannia auropunctata]	1.82456e-33
cont707	XP_011880043.1: RING finger protein 11 [Vollenhovia emeryi]	2.62129e-101
cont708	XP_011684515.1: RING finger protein 11 [Wasmannia auropunctata]	1.01992e-59
cont712	XP_011176138.1: LOW QUALITY PROTEIN: histone-lysine N-methyltransferase SETD2 [Solenopsis invicta]	0.0
cont713	XP_011176138.1: LOW QUALITY PROTEIN: histone-lysine N-methyltransferase SETD2 [Solenopsis invicta]	0.0
cont714	XP_011176138.1: LOW QUALITY PROTEIN: histone-lysine N-methyltransferase SETD2 [Solenopsis invicta]	0.0
cont715	XP_011060827.1: uncharacterized protein LOC105149832 isoform X1 [Acromyrmex echinatior]	0.0
cont716	XP_012061780.1: uncharacterized protein LOC105625047 [Atta cephalotes]	1.91984e-22
cont717	XP_011067200.1: transcription factor E2F2 isoform X2 [Acromyrmex echinatior]	0.0
cont718	XP_011067199.1: transcription factor E2F2 isoform X1 [Acromyrmex echinatior]	0.0
cont721	XP_012238106.1: golgin subfamily A member 6-like protein 22 [Bombus impatiens]	1.44727e-61
cont722	XP_011175440.1: cytochrome P450 9e2-like [Solenopsis invicta]	0.0
cont723	XP_011873886.1: cytochrome P450 9e2-like [Vollenhovia emeryi]	9.30901e-150
cont724	XP_012526852.1: cytochrome P450 9e2-like [Monomorium pharaonis]	2.95836e-166
cont725	XP_011869594.1: uncharacterized protein LOC105562983 [Vollenhovia emeryi]	0.0
cont726	XP_012057020.1: mitogen-activated protein kinase-binding protein 1 [Atta cephalotes]	1.68679e-20
cont727	XP_011172285.1: protein FAM161A isoform X2 [Solenopsis invicta]	0.263709
cont730	XP_011873902.1: serine/threonine-protein kinase tricorner isoform X2 [Vollenhovia emeryi]	0.0
cont731	XP_011051228.1: uncharacterized protein LOC105144188 [Acromyrmex echinatior]	1.61882e-17
cont732	XP_011173907.1: uncharacterized protein LOC105206077, partial [Solenopsis invicta]	2.25531e-17
cont734	XP_011685137.1: Niemann-Pick C1 protein-like isoform X2 [Wasmannia auropunctata]	8.37163e-16
cont735	XP_011881316.1: dentin sialophosphoprotein [Vollenhovia emeryi]	0.0
cont736	XP_014790550.1: histone-lysine N-methyltransferase SETMAR-like [Octopus bimaculoides]	0.00212971
cont737	XP_011640149.1: probable G-protein coupled receptor 125 isoform X1 [Pogonomyrmex barbatus]	0.0
cont738	XP_011697838.1: RNA-binding protein 26 isoform X1 [Wasmannia auropunctata]	0.0
cont739	XP_011642865.1: protein phosphatase 1 regulatory subunit 16A isoform X2 [Pogonomyrmex barbatus]	0.0
cont740	XP_011874549.1: histone acetyltransferase KAT7 [Vollenhovia emeryi]	0.0
cont741	XP_012345296.1: collagen alpha chain CG42342-like isoform X12 [Apis florea]	0.00570566
cont742	XP_011689120.1: peptidyl-prolyl cis-trans isomerase G isoform X2 [Wasmannia auropunctata]	4.14545e-97
cont743	XP_011173499.1: peptidyl-prolyl cis-trans isomerase G [Solenopsis invicta]	9.20551e-163
cont744	XP_011059377.1: cullin-associated NEDD8-dissociated protein 1 [Acromyrmex echinatior]	0.0
cont745	XP_011884095.1: uncharacterized protein LOC105571237 [Vollenhovia emeryi]	1.57999e-39
cont746	XP_012056681.1: anaphase-promoting complex subunit 2 [Atta cephalotes]	0.0
cont747	XP_011064331.1: puff-specific protein Bx42 [Acromyrmex echinatior]	9.85797e-169
cont748	XP_012538736.1: organic cation transporter protein [Monomorium pharaonis]	0.0
cont749	XP_015114610.1: organic cation transporter protein [Diachasma alloeum]	0.0
cont750	XP_011866934.1: kalirin [Vollenhovia emeryi]	4.3869e-174
cont751	XP_011866934.1: kalirin [Vollenhovia emeryi]	0.0
cont754	XP_011707251.1: cytochrome P450 4C1-like [Wasmannia auropunctata]	2.35959e-96
cont755	XP_011882846.1: uncharacterized protein LOC105570326 isoform X2 [Vollenhovia emeryi]	4.86396e-22
cont756	XP_011704782.1: uncharacterized protein LOC105460039 isoform X1 [Wasmannia auropunctata]	0.901555
cont758	XP_011865299.1: dystonin isoform X20 [Vollenhovia emeryi]	3.6051e-06
cont761	XP_017134322.1: cytosolic non-specific dipeptidase-like [Drosophila elegans]	2.98541e-17
cont765	XP_011705488.1: ATP-binding cassette sub-family G member 4-like [Wasmannia auropunctata]	9.03824e-65
cont767	XP_011172501.1: uncharacterized protein LOC105204918 [Solenopsis invicta]	5.19587e-105
cont768	XP_015125677.1: LOW QUALITY PROTEIN: 2,4-dienoyl-CoA reductase [NADPH]-like, partial [Diachasma alloeum]	5.34362e-27
cont770	XP_012565903.1: uncharacterized protein LOC105849989 [Hydra vulgaris]	1.86266e-101
cont772	XP_011860074.1: aminopeptidase N-like isoform X1 [Vollenhovia emeryi]	0.0
cont773	XP_011860075.1: puromycin-sensitive aminopeptidase-like protein isoform X2 [Vollenhovia emeryi]	2.37027e-139
cont774	XP_011860074.1: aminopeptidase N-like isoform X1 [Vollenhovia emeryi]	1.40292e-128
cont775	XP_011693513.1: tensin-3 isoform X1 [Wasmannia auropunctata]	0.0
cont777	XP_012058976.1: uncharacterized protein LOC105622156 [Atta cephalotes]	0.0
cont778	XP_011056690.1: LOW QUALITY PROTEIN: uncharacterized protein LOC105147405 [Acromyrmex echinatior]	1.72293e-105
cont780	XP_011863412.1: nose resistant to fluoxetine protein 6-like [Vollenhovia emeryi]	3.30643e-70
cont781	XP_012061574.1: transcription factor Ken 2 [Atta cephalotes]	0.0
cont783	XP_012349866.1: uncharacterized protein LOC105737206, partial [Apis florea]	0.00323303
cont784	XP_011156653.1: T-cell immunomodulatory protein [Solenopsis invicta]	8.44038e-67
cont787	XP_011167460.1: probable ubiquitin carboxyl-terminal hydrolase FAF-X [Solenopsis invicta]	0.0
cont788	XP_011883935.1: uncharacterized protein LOC105571072 [Vollenhovia emeryi]	0.0
cont789	XP_012534461.1: adenomatous polyposis coli homolog isoform X1 [Monomorium pharaonis]	0.0290137
cont791	XP_011164471.1: uncharacterized protein LOC105199195 [Solenopsis invicta]	1.35217e-36
cont792	XP_011875251.1: methylglutaconyl-CoA hydratase, mitochondrial isoform X1 [Vollenhovia emeryi]	1.82392e-08
cont793	XP_011868176.1: troponin I isoform X11 [Vollenhovia emeryi]	2.68886e-17
cont794	XP_012526531.1: sorbin and SH3 domain-containing protein 1 isoform X18 [Monomorium pharaonis]	6.69156e-121
cont796	XP_011859931.1: X-ray repair cross-complementing protein 5-like [Vollenhovia emeryi]	0.0
cont797	XP_011646738.1: RNA-directed DNA polymerase from mobile element jockey-like [Pogonomyrmex barbatus]	6.05258e-113
cont798	XP_012063409.1: ATP-binding cassette sub-family G member 1 [Atta cephalotes]	6.0576e-19
cont800	XP_011693926.1: forkhead box protein O-like [Wasmannia auropunctata]	1.41849e-07
cont801	XP_012527663.1: transcription initiation protein SPT3 homolog [Monomorium pharaonis]	0.0
cont804	XP_011862879.1: uncharacterized protein LOC105559303 [Vollenhovia emeryi]	5.06615e-43
cont805	XP_011706294.1: aminopeptidase N-like [Wasmannia auropunctata]	4.86916e-88
cont806	XP_011706294.1: aminopeptidase N-like [Wasmannia auropunctata]	6.61484e-96
cont807	XP_012535335.1: protein jim lovell-like [Monomorium pharaonis]	0.0
cont808	XP_012535335.1: protein jim lovell-like [Monomorium pharaonis]	0.0
cont810	XP_012532043.1: probable serine/threonine-protein kinase MARK-A [Monomorium pharaonis]	3.22882e-171
cont811	XP_012532397.1: eukaryotic translation initiation factor 4H-like [Monomorium pharaonis]	1.76189e-104
cont813	XP_011876338.1: sodium/potassium-transporting ATPase subunit alpha isoform X1 [Vollenhovia emeryi]	0.0
cont814	XP_011704468.1: phosphatidylinositol 4-kinase type 2-alpha isoform X2 [Wasmannia auropunctata]	4.21534e-106
cont817	XP_012064219.1: acyl-CoA-binding domain-containing protein 5 [Atta cephalotes]	1.24933e-44
cont818	XP_011866126.1: 3-phosphoinositide-dependent protein kinase 1 [Vollenhovia emeryi]	0.0
cont820	XP_012055985.1: RNA polymerase II elongation factor Ell [Atta cephalotes]	0.0
cont822	XP_011865092.1: uncharacterized protein LOC105560525 [Vollenhovia emeryi]	0.0
cont823	XP_011865092.1: uncharacterized protein LOC105560525 [Vollenhovia emeryi]	0.0
cont824	XP_011872137.1: E3 ubiquitin-protein ligase RNF38-like isoform X3 [Vollenhovia emeryi]	2.17142e-102
cont825	XP_011872136.1: E3 ubiquitin-protein ligase RNF38-like isoform X2 [Vollenhovia emeryi]	0.0
cont826	XP_011690631.1: iroquois-class homeodomain protein IRX-3 [Wasmannia auropunctata]	4.26232e-13
cont827	XP_011872175.1: uncharacterized protein LOC105564430 [Vollenhovia emeryi]	0.0
cont828	XP_012535874.1: probable cytochrome P450 304a1, partial [Monomorium pharaonis]	7.26669e-109
cont829	XP_012057400.1: probable cytochrome P450 304a1 [Atta cephalotes]	8.1108e-88
cont830	XP_011865688.1: capon-like protein isoform X4 [Vollenhovia emeryi]	1.42442e-24
cont832	XP_011173301.1: dolichyl-diphosphooligosaccharide--protein glycosyltransferase subunit STT3B isoform X1 [Solenopsis invicta]	0.0
cont833	XP_012526859.1: dolichyl-diphosphooligosaccharide--protein glycosyltransferase subunit STT3B isoform X1 [Monomorium pharaonis]	0.0
cont836	XP_011165010.1: proteasome activator complex subunit 4-like [Solenopsis invicta]	4.68528e-17
cont837	XP_012060556.1: proteasome activator complex subunit 4B-like [Atta cephalotes]	0.0
cont838	XP_012057083.1: uncharacterized protein LOC105620188 [Atta cephalotes]	0.0
cont839	XP_011703532.1: phospholipase A2 [Wasmannia auropunctata]	2.58922e-63
cont840	XP_011691962.1: DDRGK domain-containing protein 1 isoform X1 [Wasmannia auropunctata]	4.64021e-85
cont842	XP_012537648.1: uncharacterized protein LOC105837421 [Monomorium pharaonis]	0.0
cont844	XP_012522673.1: leucine-rich repeat transmembrane neuronal protein 4-like [Monomorium pharaonis]	3.82803e-92
cont845	XP_011160783.1: leucine-rich repeat-containing protein 15-like [Solenopsis invicta]	1.13434e-30
cont848	XP_011063793.1: E3 ubiquitin-protein ligase MARCH6 [Acromyrmex echinatior]	5.29002e-78
cont849	XP_011880861.1: piezo-type mechanosensitive ion channel component 1 isoform X5 [Vollenhovia emeryi]	0.0
cont851	XP_011880863.1: piezo-type mechanosensitive ion channel component 1 isoform X7 [Vollenhovia emeryi]	0.0
cont852	XP_011630440.1: baculoviral IAP repeat-containing protein 7-B-like isoform X1 [Pogonomyrmex barbatus]	1.52371e-158
cont853	XP_011703061.1: GTPase-activating Rap/Ran-GAP domain-like protein 3 isoform X1 [Wasmannia auropunctata]	1.87923e-08
cont854	XP_011878422.1: neurotrimin isoform X7 [Vollenhovia emeryi]	0.0
cont855	XP_011156880.1: neurotrimin isoform X1 [Solenopsis invicta]	2.87557e-163
cont856	XP_011635973.1: neurotrimin isoform X6 [Pogonomyrmex barbatus]	8.52117e-97
cont857	XP_011688872.1: uncharacterized protein LOC105450638 [Wasmannia auropunctata]	9.71435e-50
cont859	XP_012233899.1: uncharacterized protein LOC105678807 [Linepithema humile]	0.0
cont861	XP_011879315.1: protein diaphanous isoform X1 [Vollenhovia emeryi]	0.0
cont862	XP_011863480.1: peroxisomal acyl-coenzyme A oxidase 3 isoform X2 [Vollenhovia emeryi]	0.0
cont863	XP_012527956.1: peroxisomal acyl-coenzyme A oxidase 3-like [Monomorium pharaonis]	1.42373e-65
cont864	XP_011863477.1: uncharacterized protein LOC105559642 isoform X1 [Vollenhovia emeryi]	0.0
cont865	XP_011168273.1: NF-kappa-B inhibitor alpha-like [Solenopsis invicta]	1.4766e-39
cont866	XP_012062867.1: glutamyl aminopeptidase-like [Atta cephalotes]	0.0
cont867	XP_012062867.1: glutamyl aminopeptidase-like [Atta cephalotes]	0.0
cont869	XP_011867258.1: actin cytoskeleton-regulatory complex protein PAN1 isoform X1 [Vollenhovia emeryi]	0.0
cont870	XP_012529995.1: ATP-dependent Clp protease ATP-binding subunit clpX-like, mitochondrial isoform X2 [Monomorium pharaonis]	2.20706e-62
cont872	XP_011695492.1: MATH and LRR domain-containing protein PFE0570w [Wasmannia auropunctata]	0.0
cont873	XP_012530768.1: scavenger receptor class B member 1 [Monomorium pharaonis]	0.0
cont876	XP_011692935.1: serine/threonine-protein kinase TAO1 isoform X1 [Wasmannia auropunctata]	0.0
cont877	XP_011684801.1: myelin regulatory factor-like protein isoform X1 [Wasmannia auropunctata]	0.0
cont878	XP_011864565.1: ejaculatory bulb-specific protein 3-like [Vollenhovia emeryi]	7.31513e-63
cont879	XP_011172285.1: protein FAM161A isoform X2 [Solenopsis invicta]	3.54682e-32
cont880	XP_011696364.1: uncharacterized protein LOC105455014 [Wasmannia auropunctata]	0.0
cont881	XP_011696364.1: uncharacterized protein LOC105455014 [Wasmannia auropunctata]	0.0
cont882	XP_011878089.1: uncharacterized protein LOC105567651, partial [Vollenhovia emeryi]	0.0
cont883	XP_011704648.1: Bloom syndrome protein homolog isoform X1 [Wasmannia auropunctata]	0.0
cont884	XP_011869684.1: gonadotropin-releasing hormone II receptor [Vollenhovia emeryi]	1.75635e-140
cont886	XP_011871476.1: protein unc-79 homolog [Vollenhovia emeryi]	0.0
cont887	XP_011860478.1: protein tweety [Vollenhovia emeryi]	1.65486e-64
cont888	XP_011694041.1: forkhead box protein O-like [Wasmannia auropunctata]	0.0131721
cont889	XP_011633527.1: uncharacterized protein LOC105424795 [Pogonomyrmex barbatus]	4.4251e-17
cont891	XP_011880144.1: MAP7 domain-containing protein 1-like isoform X10 [Vollenhovia emeryi]	0.0
cont892	XP_012521357.1: odorant receptor 43a-like isoform X2 [Monomorium pharaonis]	7.35129e-80
cont894	XP_012223296.1: uncharacterized protein LOC105672740 [Linepithema humile]	0.323703
cont895	XP_011055209.1: histone acetyltransferase p300 [Acromyrmex echinatior]	1.84567e-45
cont896	XP_011684529.1: CREB-binding protein isoform X4 [Wasmannia auropunctata]	3.06805e-20
cont897	XP_012062939.1: CREB-binding protein [Atta cephalotes]	4.73504e-91
cont899	XP_011874714.1: THAP domain-containing protein 2-like isoform X1 [Vollenhovia emeryi]	0.0284648
cont900	XP_012539143.1: homeobox protein B-H2-like [Monomorium pharaonis]	0.0
cont901	XP_011637359.1: ski oncogene [Pogonomyrmex barbatus]	1.14541e-17
cont902	XP_011156274.1: probable H/ACA ribonucleoprotein complex subunit 1 [Solenopsis invicta]	3.55809e-10
cont903	XP_011638429.1: uncharacterized protein LOC105428060 isoform X8 [Pogonomyrmex barbatus]	0.0
cont904	XP_011166554.1: anoctamin-8 isoform X3 [Solenopsis invicta]	0.0
cont905	XP_011861892.1: anoctamin-8-like isoform X1 [Vollenhovia emeryi]	0.0
cont906	XP_011861892.1: anoctamin-8-like isoform X1 [Vollenhovia emeryi]	3.87024e-90
cont907	XP_011161191.1: uncharacterized protein LOC105196784 [Solenopsis invicta]	4.54408e-102
cont910	XP_011864953.1: bestrophin-4-like [Vollenhovia emeryi]	0.0
cont911	XP_012538019.1: bestrophin-4-like isoform X2 [Monomorium pharaonis]	1.47266e-37
cont912	XP_011864953.1: bestrophin-4-like [Vollenhovia emeryi]	0.0
cont913	XP_012538018.1: bestrophin-4-like isoform X1 [Monomorium pharaonis]	3.95766e-34
cont914	XP_011054773.1: probable phenylalanine--tRNA ligase, mitochondrial [Acromyrmex echinatior]	0.0
cont915	XP_011870568.1: ankycorbin isoform X3 [Vollenhovia emeryi]	0.0
cont916	XP_011051107.1: uncharacterized protein LOC105144108 [Acromyrmex echinatior]	1.6286e-50
cont917	XP_011861392.1: uncharacterized protein LOC105558377, partial [Vollenhovia emeryi]	6.64452e-16
cont918	XP_011051107.1: uncharacterized protein LOC105144108 [Acromyrmex echinatior]	4.42397e-41
cont919	XP_011689990.1: uncharacterized protein LOC105451320 [Wasmannia auropunctata]	0.00503621
cont920	XP_011690427.1: ATP synthase subunit beta, mitochondrial-like [Wasmannia auropunctata]	1.05882e-71
cont923	XP_012528780.1: ankyrin repeat domain-containing protein 29-like [Monomorium pharaonis]	3.03898e-08
cont924	XP_011158087.1: uncharacterized protein LOC105194721 [Solenopsis invicta]	1.03003e-24
cont925	XP_011698821.1: DNA ligase 1 isoform X1 [Wasmannia auropunctata]	1.16267e-10
cont926	XP_012538842.1: phospholipase A2, partial [Monomorium pharaonis]	5.10524e-07
cont927	XP_011862453.1: coagulation factor X [Vollenhovia emeryi]	0.0
cont928	XP_011689138.1: forkhead box protein K1 isoform X1 [Wasmannia auropunctata]	1.17624e-67
cont929	XP_011156854.1: forkhead box protein K1 isoform X2 [Solenopsis invicta]	1.53463e-137
cont930	XP_012522505.1: transmembrane emp24 domain-containing protein 5 [Monomorium pharaonis]	1.62803e-25
cont931	XP_011877276.1: uncharacterized protein LOC105567210 [Vollenhovia emeryi]	1.37401e-157
cont932	XP_011701811.1: exportin-4-like isoform X1 [Wasmannia auropunctata]	0.0
cont934	XP_011869308.1: WD repeat-containing protein 78-like [Vollenhovia emeryi]	0.0
cont935	XP_012234580.1: RNA-directed DNA polymerase from mobile element jockey-like [Linepithema humile]	1.0225e-54
cont936	XP_011698875.1: glutamyl-tRNA(Gln) amidotransferase subunit B, mitochondrial [Wasmannia auropunctata]	0.0
cont937	XP_011644012.1: transcription factor IIIB 90 kDa subunit-like [Pogonomyrmex barbatus]	8.29616e-104
cont938	XP_012530597.1: 26S proteasome non-ATPase regulatory subunit 6 [Monomorium pharaonis]	0.0
cont939	XP_011870216.1: CDK5 regulatory subunit-associated protein 3 [Vollenhovia emeryi]	0.0
cont940	XP_011694064.1: protein mesh isoform X2 [Wasmannia auropunctata]	0.0
cont941	XP_011872335.1: cytosolic non-specific dipeptidase [Vollenhovia emeryi]	0.0
cont942	XP_011638273.1: protein yellow-like [Pogonomyrmex barbatus]	5.088e-05
cont944	XP_012532519.1: protein farnesyltransferase/geranylgeranyltransferase type-1 subunit alpha [Monomorium pharaonis]	0.0
cont945	XP_014232431.1: eukaryotic translation initiation factor 2 subunit 1 [Trichogramma pretiosum]	6.23626e-21
cont949	XP_012060322.1: alpha-tocopherol transfer protein-like [Atta cephalotes]	2.94468e-90
cont951	XP_011630949.1: transient receptor potential protein-like [Pogonomyrmex barbatus]	9.88602e-62
cont952	XP_011168031.1: phosphoglycolate phosphatase-like [Solenopsis invicta]	0.0
cont955	XP_012063728.1: cGMP-dependent protein kinase, isozyme 2 forms cD4/T1/T3A/T3B [Atta cephalotes]	3.1895e-27
cont957	XP_011059776.1: RING finger and SPRY domain-containing protein 1-like [Acromyrmex echinatior]	0.0
cont958	XP_011688245.1: uncharacterized protein LOC105450201 [Wasmannia auropunctata]	6.93208e-145
cont959	XP_011053624.1: organic cation transporter protein-like [Acromyrmex echinatior]	0.00490824
cont961	XP_011064093.1: uncharacterized protein LOC105151848 isoform X2 [Acromyrmex echinatior]	0.0
cont963	XP_011689336.1: transcription factor Adf-1-like [Wasmannia auropunctata]	1.55119e-11
cont966	XP_011639667.1: serine/threonine-protein kinase grp [Pogonomyrmex barbatus]	0.0
cont967	XP_012527937.1: leucine-rich repeat protein soc-2-like [Monomorium pharaonis]	5.25816e-06
cont973	XP_015772768.1: 1-aminocyclopropane-1-carboxylate oxidase-like [Acropora digitifera]	9.76306e-28
cont974	XP_011861747.1: odorant receptor 43a-like [Vollenhovia emeryi]	2.61186e-16
cont976	XP_011691230.1: arginine/serine-rich coiled-coil protein 2-like [Wasmannia auropunctata]	0.0919865
cont977	XP_011866088.1: uncharacterized protein LOC105561051 isoform X1 [Vollenhovia emeryi]	1.5535e-35
cont986	XP_003693846.1: ADP-ribosylation factor-like protein 1 isoform X2 [Apis florea]	2.72308e-34
cont987	XP_011166202.1: ras-related protein Rab-32 isoform X3 [Solenopsis invicta]	7.90119e-08
cont988	XP_012522563.1: uncharacterized protein LOC105828651, partial [Monomorium pharaonis]	1.71012e-16
cont990	XP_011882870.1: maternal protein tudor [Vollenhovia emeryi]	0.0
cont991	XP_011158490.1: H(+)/Cl(-) exchange transporter 7 [Solenopsis invicta]	0.0
cont993	XP_012055714.1: tyramine receptor 1 [Atta cephalotes]	0.0
cont994	XP_012540828.1: SET and MYND domain-containing protein 4 isoform X2 [Monomorium pharaonis]	0.0
cont995	XP_011876160.1: uncharacterized protein LOC105566624 isoform X1 [Vollenhovia emeryi]	0.0
cont996	XP_011877990.1: tribbles homolog 2 [Vollenhovia emeryi]	7.38248e-38
cont997	XP_011693044.1: uncharacterized protein LOC105453061 isoform X4 [Wasmannia auropunctata]	6.17083e-147
cont998	XP_011171147.1: SH3 domain-containing protein 19 isoform X1 [Solenopsis invicta]	1.00683e-32
cont999	XP_012064132.1: proteasome subunit beta type-3 [Atta cephalotes]	1.42736e-96
cont1000	XP_011862102.1: uncharacterized protein LOC105558799 isoform X1 [Vollenhovia emeryi]	2.71087e-101
cont1002	XP_011313610.1: uncharacterized protein LOC105273072 [Fopius arisanus]	1.84164e-146
cont1003	XP_011697340.1: transport and Golgi organization protein 6 homolog [Wasmannia auropunctata]	0.0
cont1004	XP_011633531.1: dedicator of cytokinesis protein 3 isoform X1 [Pogonomyrmex barbatus]	0.0
cont1007	XP_011641463.1: protein Tob1-like [Pogonomyrmex barbatus]	6.97007e-11
cont1008	XP_011871783.1: DE-cadherin [Vollenhovia emeryi]	0.0
cont1009	XP_012530777.1: uncharacterized protein LOC105833527 isoform X2 [Monomorium pharaonis]	0.0
cont1010	XP_011872694.1: 1-acyl-sn-glycerol-3-phosphate acyltransferase alpha isoform X1 [Vollenhovia emeryi]	4.17696e-62
cont1011	XP_014481167.1: cytoplasmic protein NCK1 isoform X1 [Dinoponera quadriceps]	5.6032e-39
cont1015	XP_011065298.1: protein polybromo-1 isoform X3 [Acromyrmex echinatior]	0.0
cont1016	XP_011875203.1: endothelin-converting enzyme 1 isoform X1 [Vollenhovia emeryi]	2.84274e-129
cont1017	XP_012222093.1: ATP synthase subunit gamma, mitochondrial [Linepithema humile]	2.3309e-93
cont1018	XP_011158085.1: ATP synthase subunit gamma, mitochondrial [Solenopsis invicta]	9.99198e-84
cont1019	XP_011634737.1: stromelysin-1-like [Pogonomyrmex barbatus]	0.00060755
cont1020	XP_011872543.1: histidine--tRNA ligase, cytoplasmic isoform X3 [Vollenhovia emeryi]	6.43934e-108
cont1021	XP_011872542.1: histidine--tRNA ligase, cytoplasmic isoform X2 [Vollenhovia emeryi]	0.0
cont1023	XP_011174290.1: casein kinase I isoform alpha isoform X1 [Solenopsis invicta]	9.43654e-152
cont1024	XP_012531288.1: 26S proteasome non-ATPase regulatory subunit 2 [Monomorium pharaonis]	7.07532e-124
cont1025	XP_012062777.1: potassium/sodium hyperpolarization-activated cyclic nucleotide-gated channel 3 [Atta cephalotes]	0.0
cont1028	XP_011163828.1: integrin alpha-8-like [Solenopsis invicta]	6.66835e-33
cont1029	XP_011164748.1: uncharacterized protein LOC105199370 [Solenopsis invicta]	1.04022e-52
cont1032	XP_011699705.1: leucine-rich repeat-containing protein C10orf11-like isoform X1 [Wasmannia auropunctata]	2.5634e-142
cont1034	XP_011880607.1: golgin subfamily A member 1 [Vollenhovia emeryi]	0.0
cont1035	XP_011699898.1: N-(5-amino-5-carboxypentanoyl)-L-cysteinyl-D-valine synthase [Wasmannia auropunctata]	2.86247e-85
cont1036	XP_012527447.1: coiled-coil domain-containing protein AGAP005037 isoform X7 [Monomorium pharaonis]	1.24046e-164
cont1037	XP_006570628.2: steroid receptor seven-up, isoforms B/C [Apis mellifera]	0.0
cont1039	XP_012058492.1: zinc finger protein ush [Atta cephalotes]	6.34144e-33
cont1040	XP_011870192.1: inositol 1,4,5-trisphosphate receptor isoform X9 [Vollenhovia emeryi]	0.0
cont1041	XP_011049554.1: inositol 1,4,5-trisphosphate receptor isoform X6 [Acromyrmex echinatior]	0.0
cont1042	XP_011870067.1: thyroid receptor-interacting protein 6 [Vollenhovia emeryi]	1.16628e-95
cont1043	XP_011055961.1: spondin-1 [Acromyrmex echinatior]	3.53887e-94
cont1044	XP_011064569.1: myosin-I heavy chain-like isoform X1 [Acromyrmex echinatior]	0.0
cont1046	XP_011692505.1: uncharacterized protein LOC105452787 [Wasmannia auropunctata]	2.59181e-84
cont1047	XP_011876845.1: uncharacterized protein LOC105566982 [Vollenhovia emeryi]	1.30216e-55
cont1048	XP_012524810.1: dual specificity protein phosphatase CDC14B isoform X2 [Monomorium pharaonis]	0.0
cont1049	XP_011876845.1: uncharacterized protein LOC105566982 [Vollenhovia emeryi]	0.0
cont1050	XP_012542863.1: cytosolic 10-formyltetrahydrofolate dehydrogenase isoform X2 [Monomorium pharaonis]	3.68864e-73
cont1051	XP_014481934.1: tubulin alpha-1 chain-like [Dinoponera quadriceps]	1.42001e-30
cont1053	XP_012055646.1: cell division cycle protein 23 homolog [Atta cephalotes]	2.69714e-150
cont1054	XP_012539295.1: long-chain fatty acid transport protein 4 [Monomorium pharaonis]	0.0
cont1055	XP_011684306.1: tektin-1 [Wasmannia auropunctata]	0.0
cont1056	XP_011869925.1: long-chain fatty acid transport protein 4 [Vollenhovia emeryi]	5.23101e-29
cont1057	XP_011170126.1: uncharacterized family 31 glucosidase KIAA1161 isoform X4 [Solenopsis invicta]	2.36927e-09
cont1058	XP_011693272.1: uncharacterized protein LOC105453214 isoform X1 [Wasmannia auropunctata]	0.0
cont1059	XP_011173991.1: uncharacterized protein LOC105206174, partial [Solenopsis invicta]	6.3795e-16
cont1060	XP_011694728.1: mucin-17-like [Wasmannia auropunctata]	0.0
cont1071	XP_012058625.1: muskelin [Atta cephalotes]	5.05929e-35
cont1072	XP_011703572.1: importin-4-like isoform X4 [Wasmannia auropunctata]	0.0
cont1073	XP_011866968.1: agrin-like [Vollenhovia emeryi]	0.0
cont1074	XP_011858663.1: PERQ amino acid-rich with GYF domain-containing protein 2-like [Vollenhovia emeryi]	4.76147e-118
cont1075	XP_011642733.1: uncharacterized protein LOC105430743 [Pogonomyrmex barbatus]	4.53746e-154
cont1076	XP_011867277.1: endocuticle structural glycoprotein ABD-5-like isoform X2 [Vollenhovia emeryi]	4.07972e-35
cont1088	XP_014482394.1: sericin 1 isoform X3 [Dinoponera quadriceps]	0.533177
cont1089	XP_011699661.1: glycine-rich protein DOT1 isoform X1 [Wasmannia auropunctata]	2.50167e-20
cont1090	XP_011859003.1: RNA-directed DNA polymerase from mobile element jockey-like [Vollenhovia emeryi]	0.0
cont1094	XP_011647393.1: uncharacterized protein LOC105433677 [Pogonomyrmex barbatus]	5.4671e-146
cont1096	XP_011869606.1: facilitated trehalose transporter Tret1-2 homolog [Vollenhovia emeryi]	4.63214e-44
cont1097	XP_011869617.1: solute carrier family 2, facilitated glucose transporter member 8-like [Vollenhovia emeryi]	5.1347e-143
cont1098	XP_011689225.1: solute carrier family 12 member 9 [Wasmannia auropunctata]	8.06452e-91
cont1100	XP_011859602.1: uncharacterized protein LOC105557068, partial [Vollenhovia emeryi]	7.44888e-113
cont1111	XP_011705175.1: uncharacterized protein LOC105460429 isoform X2 [Wasmannia auropunctata]	7.71532e-151
cont1114	XP_011685199.1: uncharacterized protein LOC105448375 [Wasmannia auropunctata]	2.29198e-25
cont1116	XP_011876426.1: mucin-19 [Vollenhovia emeryi]	1.79031e-76
cont1118	XP_011698212.1: acyl-CoA Delta(11) desaturase-like [Wasmannia auropunctata]	0.0
cont1119	XP_011872707.1: uncharacterized protein LOC105564713 isoform X3 [Vollenhovia emeryi]	4.06352e-61
cont1121	XP_011881485.1: WD repeat-containing protein 48 isoform X1 [Vollenhovia emeryi]	0.0
cont1122	XP_011638667.1: leukotriene A-4 hydrolase-like [Pogonomyrmex barbatus]	3.23053e-28
cont1125	XP_011881535.1: endoribonuclease Dcr-1 [Vollenhovia emeryi]	0.0
cont1126	XP_011880811.1: uncharacterized protein LOC105569197 [Vollenhovia emeryi]	0.0
cont1127	XP_011630076.1: matrix metalloproteinase-24-like [Pogonomyrmex barbatus]	1.40634e-40
cont1128	XP_011868955.1: DNA-binding protein RFX2 isoform X5 [Vollenhovia emeryi]	0.0
cont1129	XP_011868958.1: DNA-binding protein RFX2 isoform X7 [Vollenhovia emeryi]	0.0
cont1130	XP_011868958.1: DNA-binding protein RFX2 isoform X7 [Vollenhovia emeryi]	0.0
cont1131	XP_011067164.1: titin-like [Acromyrmex echinatior]	1.3766e-95
cont1134	XP_011876467.1: kinesin-like protein KIF23 isoform X1 [Vollenhovia emeryi]	0.0
cont1135	XP_011051517.1: sodium-dependent nutrient amino acid transporter 1 [Acromyrmex echinatior]	1.00322e-99
cont1136	XP_011872867.1: G protein-coupled receptor kinase 1 [Vollenhovia emeryi]	0.0
cont1137	XP_011872867.1: G protein-coupled receptor kinase 1 [Vollenhovia emeryi]	9.69486e-149
cont1140	XP_011158205.1: iron-sulfur cluster assembly enzyme ISCU, mitochondrial [Solenopsis invicta]	2.17137e-85
cont1141	XP_012540397.1: uncharacterized protein LOC105838973 [Monomorium pharaonis]	0.0
cont1142	XP_012218013.1: inositol oxygenase [Linepithema humile]	0.0
cont1143	XP_011169692.1: putative cysteine proteinase CG12163 [Solenopsis invicta]	1.25975e-70
cont1144	XP_011159419.1: pleiotropic regulator 1 [Solenopsis invicta]	0.0
cont1146	XP_014216031.1: ADP-ribosylation factor 6 [Copidosoma floridanum]	2.76499e-111
cont1147	XP_012215193.1: protein sprint isoform X6 [Linepithema humile]	0.0
cont1148	XP_012215193.1: protein sprint isoform X6 [Linepithema humile]	0.0
cont1149	XP_011704212.1: serine/threonine-protein kinase rio2 [Wasmannia auropunctata]	0.0
cont1150	XP_012062969.1: LOW QUALITY PROTEIN: uncharacterized protein LOC105626275 [Atta cephalotes]	0.0
cont1151	XP_011163550.1: transcription elongation factor, mitochondrial-like [Solenopsis invicta]	3.32568e-157
cont1153	XP_011173016.1: C-Maf-inducing protein-like [Solenopsis invicta]	1.30359e-20
cont1154	XP_011050691.1: ephrin type-B receptor 1, partial [Acromyrmex echinatior]	0.0
cont1155	XP_014222484.1: GTP-binding nuclear protein Ran [Trichogramma pretiosum]	0.0074632
cont1156	XP_011641933.1: mitochondrial coenzyme A transporter SLC25A42 [Pogonomyrmex barbatus]	3.25011e-93
cont1157	XP_011166133.1: mitochondrial coenzyme A transporter SLC25A42 [Solenopsis invicta]	1.33922e-87
cont1158	XP_012530211.1: tripartite motif-containing protein 2-like isoform X1 [Monomorium pharaonis]	0.0
cont1159	XP_011706682.1: von Willebrand factor A domain-containing protein 8 [Wasmannia auropunctata]	0.0
cont1160	XP_011706682.1: von Willebrand factor A domain-containing protein 8 [Wasmannia auropunctata]	0.0
cont1161	XP_011704069.1: uncharacterized protein LOC105459603 isoform X2 [Wasmannia auropunctata]	0.0
cont1162	XP_012054532.1: MATH and LRR domain-containing protein PFE0570w-like [Atta cephalotes]	0.0
cont1163	XP_011176003.1: eukaryotic translation initiation factor 3 subunit E isoform X2 [Solenopsis invicta]	0.0
cont1164	XP_011176002.1: eukaryotic translation initiation factor 3 subunit E isoform X1 [Solenopsis invicta]	0.0
cont1166	XP_011052968.1: KN motif and ankyrin repeat domain-containing protein 2 isoform X2 [Acromyrmex echinatior]	6.66409e-63
cont1167	XP_011859053.1: uncharacterized protein LOC105556569, partial [Vollenhovia emeryi]	2.70807e-98
cont1168	XP_012536506.1: translocation protein SEC62 [Monomorium pharaonis]	6.55385e-28
cont1169	XP_011066774.1: glomulin [Acromyrmex echinatior]	0.0
cont1170	XP_011164438.1: calmodulin-binding transcription activator 2 isoform X1 [Solenopsis invicta]	0.0
cont1171	XP_011694594.1: uncharacterized protein LOC105453979 [Wasmannia auropunctata]	2.77402e-89
cont1172	XP_011639997.1: longitudinals lacking protein, isoforms N/O/W/X/Y isoform X5 [Pogonomyrmex barbatus]	2.00424e-90
cont1173	XP_011162758.1: uncharacterized protein LOC105197869 isoform X1 [Solenopsis invicta]	1.15629e-64
cont1174	XP_011878059.1: uncharacterized protein LOC105567640 isoform X1 [Vollenhovia emeryi]	0.0
cont1175	XP_011156824.1: uncharacterized protein LOC105193868 isoform X1 [Solenopsis invicta]	0.0
cont1178	XP_011859264.1: uncharacterized protein LOC105556764 isoform X2 [Vollenhovia emeryi]	2.48193e-136
cont1179	XP_012535790.1: uncharacterized protein LOC105836361 isoform X2 [Monomorium pharaonis]	3.33596e-81
cont1180	XP_011865783.1: uncharacterized protein LOC105560891 isoform X1 [Vollenhovia emeryi]	0.0
cont1181	XP_011859007.1: uncharacterized protein LOC105556520 [Vollenhovia emeryi]	1.67914e-175
cont1182	XP_011630140.1: AF4/FMR2 family member 4 isoform X3 [Pogonomyrmex barbatus]	1.46781e-09
cont1183	XP_011858239.1: uncharacterized protein LOC105555809 [Vollenhovia emeryi]	1.51392e-126
cont1184	XP_011860929.1: DEAD-box ATP-dependent RNA helicase 20-like [Vollenhovia emeryi]	7.66413e-05
cont1185	XP_011636391.1: uncharacterized protein LOC105426722 isoform X1 [Pogonomyrmex barbatus]	1.54713e-27
cont1188	XP_012061050.1: DET1- and DDB1-associated protein 1 [Atta cephalotes]	1.65747e-34
cont1191	XP_011160788.1: mediator of RNA polymerase II transcription subunit 7 [Solenopsis invicta]	1.70455e-128
cont1194	XP_011866161.1: serine protease gd-like isoform X2 [Vollenhovia emeryi]	7.27147e-25
cont1195	XP_011157905.1: COX assembly mitochondrial protein homolog [Solenopsis invicta]	3.93135e-19
cont1196	XP_011157905.1: COX assembly mitochondrial protein homolog [Solenopsis invicta]	4.91739e-19
cont1199	XP_011875146.1: recQ-mediated genome instability protein 1-like isoform X1 [Vollenhovia emeryi]	0.0
cont1200	XP_011879210.1: argininosuccinate lyase [Vollenhovia emeryi]	0.0
cont1201	XP_008185317.1: RNA-directed DNA polymerase from mobile element jockey-like [Acyrthosiphon pisum]	1.75278e-15
cont1202	XP_011053531.1: ADP-dependent glucokinase isoform X1 [Acromyrmex echinatior]	0.0
cont1205	XP_014214078.1: uncharacterized protein LOC106643444 [Copidosoma floridanum]	1.16134e-64
cont1208	XP_011704520.1: uncharacterized protein LOC105459876 [Wasmannia auropunctata]	0.0
cont1212	XP_011060860.1: longitudinals lacking protein-like isoform X1 [Acromyrmex echinatior]	1.23715e-91
cont1213	XP_011168305.1: kidney mitochondrial carrier protein 1 isoform X1 [Solenopsis invicta]	6.23126e-130
cont1214	XP_011168306.1: kidney mitochondrial carrier protein 1 isoform X2 [Solenopsis invicta]	3.00479e-59
cont1215	XP_011871524.1: uncharacterized protein LOC105564043 [Vollenhovia emeryi]	2.67347e-86
cont1216	XP_011685474.1: uncharacterized protein LOC105448526 [Wasmannia auropunctata]	5.44871e-114
cont1217	XP_011864121.1: uncharacterized protein LOC105560006 [Vollenhovia emeryi]	1.76309e-16
cont1218	XP_011690285.1: uncharacterized protein LOC105451500 [Wasmannia auropunctata]	3.96148e-08
cont1220	XP_011869797.1: 5'-3' exoribonuclease 1 [Vollenhovia emeryi]	0.0
cont1223	XP_015191024.1: 46 kDa FK506-binding nuclear protein [Polistes dominula]	3.02015e-22
cont1224	XP_011637998.1: arf-GAP domain and FG repeat-containing protein 1 isoform X1 [Pogonomyrmex barbatus]	3.96883e-33
cont1225	XP_011692551.1: 46 kDa FK506-binding nuclear protein-like isoform X3 [Wasmannia auropunctata]	8.10736e-17
cont1230	XP_011172391.1: tektin-2 [Solenopsis invicta]	1.66628e-17
cont1232	XP_011067325.1: phosphatidate cytidylyltransferase, photoreceptor-specific isoform X1 [Acromyrmex echinatior]	0.0
cont1234	XP_015127114.1: uncharacterized protein LOC107048461 [Diachasma alloeum]	5.42367e-32
cont1237	XP_011699294.1: uncharacterized protein LOC105456732 isoform X1 [Wasmannia auropunctata]	3.88048e-66
cont1238	XP_012056917.1: chromodomain-helicase-DNA-binding protein 7 [Atta cephalotes]	8.67456e-50
cont1239	XP_011163171.1: uncharacterized protein LOC105198215 [Solenopsis invicta]	0.0
cont1240	XP_012232672.1: LOW QUALITY PROTEIN: serum response factor-like [Linepithema humile]	0.0236888
cont1241	XP_011156397.1: protein inturned [Solenopsis invicta]	0.0
cont1242	XP_011882661.1: uncharacterized protein LOC105570225 isoform X3 [Vollenhovia emeryi]	3.07886e-42
cont1243	XP_011635118.1: uncharacterized protein LOC105425850 isoform X6 [Pogonomyrmex barbatus]	2.99763e-130
cont1244	XP_011635118.1: uncharacterized protein LOC105425850 isoform X6 [Pogonomyrmex barbatus]	4.00474e-103
cont1245	XP_011879160.1: outer dense fiber protein 3-like [Vollenhovia emeryi]	1.49655e-134
cont1246	XP_011055164.1: protein croquemort-like [Acromyrmex echinatior]	0.0050045
cont1247	XP_012058272.1: kelch repeat and BTB domain-containing protein 12-like [Atta cephalotes]	2.01093e-151
cont1249	XP_012538937.1: atrial natriuretic peptide receptor 1 [Monomorium pharaonis]	0.0
cont1254	XP_012214839.1: putative golgin subfamily A member 6-like protein 6 [Linepithema humile]	1.47154e-115
cont1256	XP_014486632.1: uncharacterized protein LOC106750653 [Dinoponera quadriceps]	1.13273e-09
cont1257	XP_011057750.1: putative adenosylhomocysteinase 2 isoform X3 [Acromyrmex echinatior]	0.0
cont1259	XP_011157052.1: receptor-type tyrosine-protein phosphatase kappa-like [Solenopsis invicta]	4.02217e-32
cont1260	XP_012542411.1: uncharacterized protein LOC105840154, partial [Monomorium pharaonis]	6.11287e-110
cont1261	XP_011157055.1: uncharacterized protein LOC105194040 [Solenopsis invicta]	1.0047e-70
cont1262	XP_011157052.1: receptor-type tyrosine-protein phosphatase kappa-like [Solenopsis invicta]	1.83591e-32
cont1264	XP_012535840.1: histone acetyltransferase p300-like [Monomorium pharaonis]	3.87729e-170
cont1265	XP_012062939.1: CREB-binding protein [Atta cephalotes]	2.5404e-139
cont1266	XP_011698742.1: uncharacterized protein LOC105456426 [Wasmannia auropunctata]	0.0
cont1269	XP_011693011.1: 26S proteasome non-ATPase regulatory subunit 2-like isoform X2 [Wasmannia auropunctata]	0.0
cont1270	XP_012521806.1: uncharacterized protein LOC105828138 [Monomorium pharaonis]	3.34914e-28
cont1272	XP_011684595.1: multidrug resistance protein homolog 49 isoform X2 [Wasmannia auropunctata]	0.114357
cont1274	XP_011873041.1: adenylyl cyclase-associated protein 1 [Vollenhovia emeryi]	2.98682e-38
cont1275	XP_011702180.1: fructose-bisphosphate aldolase-like isoform X3 [Wasmannia auropunctata]	8.18811e-45
cont1279	XP_015765263.1: omega-6 fatty acid desaturase, endoplasmic reticulum isozyme 1-like [Acropora digitifera]	7.95851e-50
cont1280	XP_011867664.1: uncharacterized protein LOC105561902 [Vollenhovia emeryi]	5.28633e-17
cont1281	XP_011878891.1: acyl-CoA Delta(11) desaturase-like [Vollenhovia emeryi]	2.69803e-98
cont1285	XP_011870371.1: cilia- and flagella-associated protein 57 [Vollenhovia emeryi]	0.0
cont1287	XP_012524668.1: hemK methyltransferase family member 2 [Monomorium pharaonis]	5.31985e-05
cont1288	XP_011169104.1: spidroin-1-like [Solenopsis invicta]	1.5069e-47
cont1290	XP_011881508.1: UDP-glucuronosyltransferase 2B31-like [Vollenhovia emeryi]	0.0
cont1291	XP_012523560.1: protein yippee-like 5 [Monomorium pharaonis]	1.02693e-72
cont1292	XP_011703946.1: zinc finger protein on ecdysone puffs isoform X3 [Wasmannia auropunctata]	0.0
cont1293	XP_011638164.1: putative adenosylhomocysteinase 2 isoform X1 [Pogonomyrmex barbatus]	0.0
cont1295	XP_011065976.1: uncharacterized protein LOC105153053, partial [Acromyrmex echinatior]	2.71497e-19
cont1296	XP_011158426.1: transmembrane protein 26 [Solenopsis invicta]	0.0
cont1297	XP_011158426.1: transmembrane protein 26 [Solenopsis invicta]	0.0
cont1298	XP_011065220.1: fibroblast growth factor receptor substrate 2 [Acromyrmex echinatior]	1.32167e-12
cont1299	XP_011876001.1: SWI/SNF-related matrix-associated actin-dependent regulator of chromatin subfamily A-like protein 1 [Vollenhovia emeryi]	0.0
cont1301	XP_011648156.1: protein lozenge-like isoform X5 [Pogonomyrmex barbatus]	4.43554e-68
cont1302	XP_016917316.1: protein lozenge-like [Apis cerana]	4.33468e-92
cont1303	XP_011058868.1: runt-related transcription factor 1-like isoform X5 [Acromyrmex echinatior]	8.41609e-48
cont1304	XP_012526935.1: uncharacterized protein LOC105831393 [Monomorium pharaonis]	6.57528e-71
cont1305	XP_012526935.1: uncharacterized protein LOC105831393 [Monomorium pharaonis]	9.25326e-16
cont1308	XP_012061707.1: segment polarity protein dishevelled homolog DVL-2 [Atta cephalotes]	3.42224e-21
cont1310	XP_011693439.1: adenosine deaminase CECR1-like [Wasmannia auropunctata]	0.0
cont1311	XP_011706307.1: golgin subfamily A member 6-like protein 22, partial [Wasmannia auropunctata]	1.25212e-17
cont1312	XP_011866482.1: ecdysone 20-monooxygenase isoform X1 [Vollenhovia emeryi]	2.85752e-164
cont1313	XP_011685440.1: ecdysone 20-monooxygenase isoform X1 [Wasmannia auropunctata]	0.0
cont1314	XP_011172207.1: ecdysone 20-monooxygenase isoform X1 [Solenopsis invicta]	0.0
cont1316	XP_011860542.1: amyloid protein-binding protein 2-like [Vollenhovia emeryi]	0.0
cont1317	XP_012533873.1: maternal protein pumilio isoform X5 [Monomorium pharaonis]	0.0
cont1318	XP_016914880.1: pumilio homolog 2 isoform X3 [Apis cerana]	1.29847e-07
cont1319	XP_011690742.1: AP-1 complex subunit mu-1 [Wasmannia auropunctata]	0.0
cont1320	XP_011690742.1: AP-1 complex subunit mu-1 [Wasmannia auropunctata]	0.0
cont1322	XP_011864279.1: uncharacterized protein LOC105560094 isoform X5 [Vollenhovia emeryi]	0.0
cont1323	XP_012064408.1: protein shifted [Atta cephalotes]	0.0
cont1324	XP_011880709.1: uncharacterized protein LOC105569127 isoform X1 [Vollenhovia emeryi]	7.43772e-115
cont1325	XP_011880710.1: uncharacterized protein LOC105569127 isoform X2 [Vollenhovia emeryi]	0.0
cont1328	XP_011860702.1: zinc finger and SCAN domain-containing protein 29-like [Vollenhovia emeryi]	3.44614e-62
cont1329	XP_012540488.1: uncharacterized protein LOC105839029 [Monomorium pharaonis]	9.18898e-24
cont1331	XP_012542022.1: ras-related protein Rab-43 [Monomorium pharaonis]	3.23755e-65
cont1334	XP_012539358.1: breast carcinoma-amplified sequence 3 homolog isoform X2 [Monomorium pharaonis]	0.0
cont1336	XP_012054210.1: B-box type zinc finger protein ncl-1 [Atta cephalotes]	0.0
cont1337	XP_011693474.1: uncharacterized protein LOC105453329 [Wasmannia auropunctata]	4.1177e-171
cont1338	XP_011642967.1: sorting nexin-8-like isoform X2 [Pogonomyrmex barbatus]	0.00126385
cont1340	XP_011878984.1: uncharacterized protein LOC105568161 isoform X3 [Vollenhovia emeryi]	0.0
cont1343	XP_012146538.1: uncharacterized protein LOC105663285 [Megachile rotundata]	1.48655e-05
cont1344	XP_012146538.1: uncharacterized protein LOC105663285 [Megachile rotundata]	4.4143e-05
cont1345	XP_012536963.1: soluble NSF attachment protein [Monomorium pharaonis]	2.29659e-160
cont1346	XP_012059941.1: translocation protein SEC63 homolog [Atta cephalotes]	0.0
cont1348	XP_011049915.1: F-box only protein 42-like isoform X2 [Acromyrmex echinatior]	1.62148e-165
cont1349	XP_012525964.1: F-box only protein 42 isoform X1 [Monomorium pharaonis]	0.0
cont1350	XP_015790323.1: uncharacterized protein LOC107367154 [Tetranychus urticae]	2.68189e-31
cont1359	XP_017121308.1: laccase domain protein DR_1966-like [Drosophila elegans]	0.200353
cont1360	XP_012541296.1: uncharacterized protein LOC105839496 [Monomorium pharaonis]	0.0
cont1362	XP_011707239.1: myb-like protein AA [Wasmannia auropunctata]	8.04132e-69
cont1363	XP_012540363.1: putative phosphatidate phosphatase isoform X1 [Monomorium pharaonis]	6.38867e-05
cont1367	XP_012521563.1: glyoxylate/hydroxypyruvate reductase A HPR2-like [Monomorium pharaonis]	5.94257e-09
cont1369	XP_017029315.1: phospho-2-dehydro-3-deoxyheptonate aldolase 2, chloroplastic-like [Drosophila kikkawai]	3.03578e-160
cont1372	XP_013190478.1: retrovirus-related Pol polyprotein from transposon TNT 1-94 [Amyelois transitella]	4.70601e-61
cont1377	XP_011638411.1: ras-specific guanine nucleotide-releasing factor 2-like isoform X5 [Pogonomyrmex barbatus]	1.28345e-135
cont1378	XP_011504096.1: uncharacterized protein LOC105367165 [Ceratosolen solmsi marchali]	1.37368e-11
cont1381	XP_011860276.1: uncharacterized protein LOC105557606 [Vollenhovia emeryi]	2.49368e-40
cont1385	XP_011696887.1: alpha-2-macroglobulin-like protein 1 isoform X2 [Wasmannia auropunctata]	0.000829378
cont1389	XP_012139844.1: cyclin-T1-like [Megachile rotundata]	7.48205e-16
cont1390	XP_011169061.1: prohormone-4 [Solenopsis invicta]	0.000168788
cont1394	XP_011174919.1: uncharacterized protein LOC105207181, partial [Solenopsis invicta]	1.42957e-161
cont1397	XP_016664628.1: ferric enterobactin transport ATP-binding protein FepC-like, partial [Acyrthosiphon pisum]	7.64975e-07
cont1404	XP_012226642.1: putative nuclease HARBI1 [Linepithema humile]	7.43013e-64
cont1406	XP_011690417.1: MAP kinase-activated protein kinase 2 [Wasmannia auropunctata]	0.0
cont1409	XP_011879644.1: uncharacterized protein LOC105568521, partial [Vollenhovia emeryi]	4.13683e-80
cont1411	XP_011695741.1: hemicentin-1-like [Wasmannia auropunctata]	0.0
cont1412	XP_011065628.1: mothers against decapentaplegic homolog 3 isoform X1 [Acromyrmex echinatior]	0.0037639
cont1413	XP_011643425.1: serine-arginine protein 55 isoform X19 [Pogonomyrmex barbatus]	1.15846e-30
cont1414	XP_012541814.1: cell wall protein DAN4 isoform X2 [Monomorium pharaonis]	0.0
cont1419	XP_012057932.1: E3 ubiquitin-protein ligase MARCH6 [Atta cephalotes]	5.59595e-65
cont1420	XP_011167177.1: E3 ubiquitin-protein ligase MARCH6 [Solenopsis invicta]	1.67353e-129
cont1422	XP_011880748.1: synapsin, partial [Vollenhovia emeryi]	0.0
cont1424	XP_015524655.1: potassium voltage-gated channel protein Shaker, partial [Neodiprion lecontei]	0.0
cont1425	XP_011173016.1: C-Maf-inducing protein-like [Solenopsis invicta]	2.54838e-105
cont1426	XP_011708014.1: C-Maf-inducing protein-like [Wasmannia auropunctata]	0.0
cont1427	XP_012525309.1: metallophosphoesterase domain-containing protein 1 [Monomorium pharaonis]	3.11029e-10
cont1428	XP_011156622.1: uncharacterized protein LOC105193745 [Solenopsis invicta]	0.0
cont1429	XP_011161464.1: serine/threonine-protein kinase par-1 [Solenopsis invicta]	0.0
cont1430	XP_011695119.1: ubiquitin carboxyl-terminal hydrolase 20 [Wasmannia auropunctata]	0.0
cont1432	XP_014296814.1: retinoic acid receptor RXR-alpha-B isoform X2 [Microplitis demolitor]	0.000155029
cont1433	XP_011687236.1: hemK methyltransferase family member 1-like [Wasmannia auropunctata]	4.37468e-43
cont1434	XP_011869095.1: cytochrome P450 CYP12A2-like [Vollenhovia emeryi]	1.61741e-143
cont1437	XP_011161978.1: histone-lysine N-methyltransferase 2C-like [Solenopsis invicta]	0.0
cont1438	XP_011629906.1: cactin [Pogonomyrmex barbatus]	0.0
cont1439	XP_011882942.1: unconventional myosin-IXb-like isoform X2 [Vollenhovia emeryi]	0.0
cont1441	XP_011689992.1: RNA-directed DNA polymerase from mobile element jockey-like [Wasmannia auropunctata]	2.71854e-05
cont1442	XP_011879758.1: aryl hydrocarbon receptor nuclear translocator-like protein 1 isoform X3 [Vollenhovia emeryi]	7.17641e-154
cont1443	XP_011859096.1: uncharacterized protein LOC105556609 [Vollenhovia emeryi]	4.4138e-38
cont1444	XP_011160264.1: protein CDV3 homolog isoform X2 [Solenopsis invicta]	7.81433e-42
cont1445	XP_011160263.1: protein CDV3 homolog isoform X1 [Solenopsis invicta]	0.907452
cont1446	XP_012532501.1: uncharacterized oxidoreductase C26H5.09c-like [Monomorium pharaonis]	7.46521e-37
cont1447	XP_011166434.1: uncharacterized protein LOC105200523 [Solenopsis invicta]	0.0
cont1448	XP_011865972.1: uncharacterized protein LOC105560987 [Vollenhovia emeryi]	4.90488e-67
cont1449	XP_011866761.1: uncharacterized protein LOC105561413 isoform X1 [Vollenhovia emeryi]	0.0
cont1450	XP_011158820.1: tyrosine-protein phosphatase 99A isoform X4 [Solenopsis invicta]	0.258841
cont1451	XP_011869861.1: putative uncharacterized protein DDB_G0277255 isoform X3 [Vollenhovia emeryi]	6.89572e-175
cont1452	XP_014480666.1: alpha-actinin, sarcomeric [Dinoponera quadriceps]	0.0
cont1454	XP_011881550.1: cytochrome P450 4g15 [Vollenhovia emeryi]	3.49353e-127
cont1457	XP_011168033.1: MAM and LDL-receptor class A domain-containing protein 2-like [Solenopsis invicta]	0.0
cont1458	XP_011168033.1: MAM and LDL-receptor class A domain-containing protein 2-like [Solenopsis invicta]	0.0
cont1459	XP_011168033.1: MAM and LDL-receptor class A domain-containing protein 2-like [Solenopsis invicta]	0.0
cont1460	XP_011168033.1: MAM and LDL-receptor class A domain-containing protein 2-like [Solenopsis invicta]	0.0
cont1461	XP_012542365.1: F-BAR and double SH3 domains protein 2 [Monomorium pharaonis]	0.0
cont1462	XP_011686954.1: inorganic pyrophosphatase isoform X2 [Wasmannia auropunctata]	1.1129e-106
cont1463	XP_011158118.1: peroxiredoxin-5, mitochondrial [Solenopsis invicta]	2.45735e-19
cont1464	XP_012054166.1: neutral and basic amino acid transport protein rBAT-like [Atta cephalotes]	0.0
cont1465	XP_011871335.1: probable multidrug resistance-associated protein lethal(2)03659 [Vollenhovia emeryi]	0.0
cont1466	XP_011883282.1: testis-expressed sequence 2 protein [Vollenhovia emeryi]	0.0
cont1467	XP_011067407.1: casein kinase I isoform gamma-3 isoform X2 [Acromyrmex echinatior]	0.0
cont1468	XP_011866980.1: ATP-binding cassette sub-family A member 5-like isoform X1 [Vollenhovia emeryi]	0.0
cont1469	XP_012064465.1: receptor-mediated endocytosis protein 6 homolog [Atta cephalotes]	0.0
cont1470	XP_012064465.1: receptor-mediated endocytosis protein 6 homolog [Atta cephalotes]	0.0
cont1471	XP_012064465.1: receptor-mediated endocytosis protein 6 homolog [Atta cephalotes]	0.0
cont1474	XP_011879441.1: uncharacterized protein LOC105568399 isoform X2 [Vollenhovia emeryi]	0.0
cont1475	XP_011059948.1: uncharacterized protein LOC105149319 [Acromyrmex echinatior]	0.00886882
cont1476	XP_011173391.1: probable cytochrome P450 6a13 [Solenopsis invicta]	1.54467e-12
cont1477	XP_011157273.1: protein Malvolio isoform X2 [Solenopsis invicta]	9.41849e-118
cont1478	XP_011700109.1: protein Malvolio-like isoform X4 [Wasmannia auropunctata]	9.06473e-155
cont1479	XP_011157500.1: protein lava lamp-like isoform X1 [Solenopsis invicta]	0.0
cont1480	XP_011169672.1: mediator of RNA polymerase II transcription subunit 13-like isoform X3 [Solenopsis invicta]	0.0
cont1481	XP_011877175.1: DNA repair protein REV1 [Vollenhovia emeryi]	3.5772e-30
cont1482	XP_011066548.1: ras-related protein Rab-5C isoform X2 [Acromyrmex echinatior]	2.94306e-34
cont1484	XP_011697327.1: titin [Wasmannia auropunctata]	0.0
cont1485	XP_012547423.1: uncharacterized protein LOC105841932 [Bombyx mori]	3.9036e-89
cont1486	XP_011056326.1: LOW QUALITY PROTEIN: uncharacterized protein LOC105147178 [Acromyrmex echinatior]	2.11486e-45
cont1487	XP_013171347.1: thymidine kinase-like [Papilio xuthus]	1.07645e-14
cont1488	XP_011686496.1: early nodulin-75-like [Wasmannia auropunctata]	3.75066e-05
cont1489	XP_015116455.1: uncharacterized protein K02A2.6-like [Diachasma alloeum]	5.68893e-98
cont1490	XP_011687610.1: protein takeout-like [Wasmannia auropunctata]	4.60905e-115
cont1492	XP_017121158.1: quinone oxidoreductase PIG3-like [Drosophila elegans]	1.74265e-47
cont1493	XP_012542416.1: receptor-type tyrosine-protein phosphatase F-like isoform X2 [Monomorium pharaonis]	3.73455e-98
cont1496	XP_012058183.1: ion transport peptide [Atta cephalotes]	5.43784e-15
cont1506	XP_011167917.1: fatty acyl-CoA reductase 1-like, partial [Solenopsis invicta]	1.57285e-73
cont1507	XP_003694870.2: protein lozenge-like, partial [Apis florea]	0.00129656
cont1508	XP_011704656.1: ethanolamine kinase 1 isoform X2 [Wasmannia auropunctata]	1.03688e-96
cont1509	XP_011867743.1: ethanolamine kinase 1 isoform X2 [Vollenhovia emeryi]	1.13057e-83
cont1510	XP_011704656.1: ethanolamine kinase 1 isoform X2 [Wasmannia auropunctata]	1.13913e-08
cont1511	XP_012539258.1: ethanolamine kinase 1 isoform X2 [Monomorium pharaonis]	6.12315e-100
cont1512	XP_012054857.1: coatomer subunit beta [Atta cephalotes]	0.0
cont1513	XP_011700257.1: uncharacterized protein LOC105457338 [Wasmannia auropunctata]	0.0
cont1514	XP_011859045.1: uncharacterized protein LOC105556561 [Vollenhovia emeryi]	0.0
cont1518	XP_011632347.1: PI-PLC X domain-containing protein 1-like isoform X1 [Pogonomyrmex barbatus]	0.0
cont1521	XP_012531796.1: peptidyl-prolyl cis-trans isomerase NIMA-interacting 4 [Monomorium pharaonis]	7.87931e-53
cont1523	XP_011861336.1: glucose dehydrogenase [FAD, quinone] [Vollenhovia emeryi]	0.0
cont1525	XP_012532092.1: uncharacterized protein LOC105834282 [Monomorium pharaonis]	3.40979e-09
cont1526	XP_011170096.1: tetratricopeptide repeat protein 1 [Solenopsis invicta]	5.44845e-22
cont1527	XP_011170096.1: tetratricopeptide repeat protein 1 [Solenopsis invicta]	5.00304e-133
cont1528	XP_011696781.1: ubiquitin-conjugating enzyme E2 G2 [Wasmannia auropunctata]	4.10668e-72
cont1529	XP_011702013.1: protein no-on-transient A [Wasmannia auropunctata]	1.00786e-15
cont1530	XP_011701809.1: uncharacterized protein LOC105458304 isoform X1 [Wasmannia auropunctata]	1.67923e-66
cont1534	XP_011863377.1: espin [Vollenhovia emeryi]	7.69899e-137
cont1535	XP_011175164.1: trichohyalin-like [Solenopsis invicta]	5.45045e-29
cont1537	XP_011697582.1: uncharacterized protein LOC105455741 [Wasmannia auropunctata]	4.14012e-06
cont1538	XP_011879066.1: aminopeptidase N-like isoform X1 [Vollenhovia emeryi]	6.45445e-147
cont1539	XP_011688496.1: geranylgeranyl transferase type-1 subunit beta [Wasmannia auropunctata]	0.0
cont1540	XP_011880975.1: uncharacterized protein LOC105569261 isoform X1 [Vollenhovia emeryi]	0.218297
cont1541	XP_011880975.1: uncharacterized protein LOC105569261 isoform X1 [Vollenhovia emeryi]	3.14136e-36
cont1542	XP_011697970.1: uncharacterized protein LOC105455948 isoform X1 [Wasmannia auropunctata]	3.38589e-07
cont1543	XP_014214738.1: uncharacterized protein LOC106643922 [Copidosoma floridanum]	3.659e-05
cont1545	XP_012217149.1: uncharacterized protein LOC105668987 [Linepithema humile]	1.34276e-163
cont1546	XP_011172595.1: uncharacterized protein LOC105205003 [Solenopsis invicta]	6.85949e-78
cont1548	XP_011062472.1: ras-related protein Ral-a isoform X1 [Acromyrmex echinatior]	5.37122e-97
cont1549	XP_011062477.1: ras-related protein Ral-a isoform X4 [Acromyrmex echinatior]	1.96796e-79
cont1555	XP_012059634.1: putative inositol monophosphatase 3 [Atta cephalotes]	2.2205e-26
cont1558	XP_011050706.1: uncharacterized protein LOC105143869 [Acromyrmex echinatior]	4.13591e-55
cont1561	XP_011862678.1: pancreatic lipase-related protein 2-like [Vollenhovia emeryi]	8.6413e-74
cont1562	XP_011699734.1: farnesyl pyrophosphate synthase-like, partial [Wasmannia auropunctata]	3.17623e-33
cont1570	XP_011054233.1: cAMP-specific 3',5'-cyclic phosphodiesterase, isoform F isoform X11 [Acromyrmex echinatior]	1.74588e-19
cont1574	XP_012541573.1: cytochrome P450 9e2-like [Monomorium pharaonis]	9.55228e-14
cont1575	XP_012541573.1: cytochrome P450 9e2-like [Monomorium pharaonis]	0.0
cont1576	XP_012541296.1: uncharacterized protein LOC105839496 [Monomorium pharaonis]	4.02993e-112
cont1577	XP_011551371.1: uncharacterized protein LOC105383056 [Plutella xylostella]	1.72614e-63
cont1579	XP_011057744.1: protein disulfide-isomerase A3 [Acromyrmex echinatior]	0.000285193
cont1580	XP_012061386.1: protein alan shepard [Atta cephalotes]	2.53557e-143
cont1581	XP_011689439.1: intersectin-1 isoform X3 [Wasmannia auropunctata]	0.0
cont1583	XP_011685116.1: zinc finger protein 236-like isoform X1 [Wasmannia auropunctata]	1.37051e-153
cont1584	XP_011873031.1: radial spoke head protein 3 homolog isoform X3 [Vollenhovia emeryi]	0.0
cont1585	XP_011865023.1: anaphase-promoting complex subunit 11 [Vollenhovia emeryi]	9.03193e-47
cont1590	XP_011690590.1: COMM domain-containing protein 4 [Wasmannia auropunctata]	3.73797e-59
cont1592	XP_011161500.1: myosin regulatory light chain 2 [Solenopsis invicta]	2.11034e-95
cont1605	XP_011158872.1: inner centromere protein-like isoform X5 [Solenopsis invicta]	1.40285e-32
cont1608	XP_011858948.1: LOW QUALITY PROTEIN: uncharacterized protein LOC105556466 [Vollenhovia emeryi]	0.0
cont1609	XP_011692871.1: uncharacterized protein LOC105452975 [Wasmannia auropunctata]	2.18331e-24
cont1612	XP_015122933.1: uncharacterized protein LOC107045255 [Diachasma alloeum]	0.0699351
cont1613	XP_015120532.1: uncharacterized protein LOC107043511 [Diachasma alloeum]	0.00177314
cont1614	XP_011049402.1: mediator of RNA polymerase II transcription subunit 24 [Acromyrmex echinatior]	0.0
cont1616	XP_011629933.1: ataxin-7-like protein 3 [Pogonomyrmex barbatus]	1.52522e-159
cont1617	XP_011868549.1: UPF0184 protein C9orf16 homolog [Vollenhovia emeryi]	4.83426e-22
cont1618	XP_011859370.1: uncharacterized protein LOC105556869 [Vollenhovia emeryi]	3.80844e-52
cont1619	XP_011171354.1: juvenile hormone epoxide hydrolase 1-like [Solenopsis invicta]	3.9987e-63
cont1621	XP_012525165.1: cholinesterase 2-like [Monomorium pharaonis]	1.30679e-122
cont1622	XP_012149734.1: uncharacterized protein LOC100878042 [Megachile rotundata]	0.000163233
cont1623	XP_011700173.1: uncharacterized protein LOC105457277 isoform X3 [Wasmannia auropunctata]	0.0
cont1624	XP_013190478.1: retrovirus-related Pol polyprotein from transposon TNT 1-94 [Amyelois transitella]	0.0
cont1626	XP_012530222.1: UDP-glucuronosyltransferase 2B1 isoform X1 [Monomorium pharaonis]	5.48637e-69
cont1628	XP_012540674.1: protein FAM195A isoform X2 [Monomorium pharaonis]	4.01705e-16
cont1629	XP_012527632.1: rab11 family-interacting protein 4A isoform X3 [Monomorium pharaonis]	0.0792204
cont1630	XP_011707305.1: beta carbonic anhydrase 1 isoform X1 [Wasmannia auropunctata]	0.0
cont1631	XP_011050963.1: sodium-dependent neutral amino acid transporter B(0)AT3 [Acromyrmex echinatior]	0.0
cont1632	XP_011876626.1: uncharacterized protein LOC105566866 isoform X1 [Vollenhovia emeryi]	0.0
cont1633	XP_011859604.1: histone H3.v1-like isoform X2 [Vollenhovia emeryi]	1.49138e-09
cont1634	XP_011884002.1: vacuole membrane protein 1-like isoform X1 [Vollenhovia emeryi]	0.0
cont1636	XP_012539411.1: uncharacterized protein LOC105838413 [Monomorium pharaonis]	0.0
cont1637	XP_011645998.1: uncharacterized protein LOC105432751 [Pogonomyrmex barbatus]	0.985912
cont1638	XP_011159620.1: ankyrin repeat domain-containing protein 18A [Solenopsis invicta]	0.0
cont1639	XP_011159620.1: ankyrin repeat domain-containing protein 18A [Solenopsis invicta]	3.06385e-114
cont1640	XP_011880525.1: furin-like protease 1, isoforms 1/1-X/2 isoform X2 [Vollenhovia emeryi]	2.42742e-137
cont1641	XP_011700297.1: thiamine transporter 2-like isoform X1 [Wasmannia auropunctata]	6.92085e-132
cont1642	XP_011700297.1: thiamine transporter 2-like isoform X1 [Wasmannia auropunctata]	0.0
cont1643	XP_006571868.1: transmembrane protein 35 isoform X2 [Apis mellifera]	0.484825
cont1646	XP_011702655.1: uncharacterized protein LOC105458803 [Wasmannia auropunctata]	0.0
cont1650	XP_017017233.1: aliphatic sulfonates import ATP-binding protein SsuB 1-like [Drosophila kikkawai]	2.56479e-22
cont1653	XP_009043798.1| hypothetical protein LOTGIDRAFT_227913 [Lottia gigantea]	2.96442e-129
cont1655	XP_011642059.1: discoidin domain-containing receptor 2 [Pogonomyrmex barbatus]	0.0
cont1659	XP_011062983.1: uncharacterized protein LOC105151137 [Acromyrmex echinatior]	6.96607e-102
cont1665	XP_011859869.1: uncharacterized protein LOC105557281 [Vollenhovia emeryi]	1.86185e-41
cont1666	XP_003692719.2: DNA gyrase subunit B, chloroplastic/mitochondrial-like, partial [Apis florea]	9.53443e-24
cont1667	XP_011694070.1: head-specific guanylate cyclase isoform X2 [Wasmannia auropunctata]	9.91863e-08
cont1673	XP_011872275.1: mutS protein homolog 5-like [Vollenhovia emeryi]	2.70088e-45
cont1674	XP_011862723.1: programmed cell death 6-interacting protein isoform X2 [Vollenhovia emeryi]	5.35716e-69
cont1675	XP_011689099.1: programmed cell death 6-interacting protein [Wasmannia auropunctata]	0.0
cont1676	XP_011629722.1: uncharacterized protein LOC105422153 [Pogonomyrmex barbatus]	0.0299384
cont1678	XP_011873403.1: glutaminyl-peptide cyclotransferase isoform X1 [Vollenhovia emeryi]	8.51707e-50
cont1679	XP_011865850.1: DNA polymerase eta [Vollenhovia emeryi]	0.0
cont1680	XP_011698247.1: hemicentin-1 isoform X3 [Wasmannia auropunctata]	3.7071e-78
cont1681	XP_011870801.1: uncharacterized protein LOC105563650 isoform X1 [Vollenhovia emeryi]	1.51756e-80
cont1683	XP_011869551.1: uncharacterized protein LOC105562960 isoform X4 [Vollenhovia emeryi]	1.02828e-46
cont1684	XP_011702155.1: calcium/calmodulin-dependent 3',5'-cyclic nucleotide phosphodiesterase 1A-like isoform X5 [Wasmannia auropunctata]	0.0
cont1687	XP_015516030.1: choline/ethanolamine kinase isoform X1 [Neodiprion lecontei]	1.98304e-05
cont1688	XP_011689154.1: E3 ubiquitin-protein ligase UHRF1-like [Wasmannia auropunctata]	0.0
cont1689	XP_011689154.1: E3 ubiquitin-protein ligase UHRF1-like [Wasmannia auropunctata]	0.0
cont1691	XP_011874599.1: protein timeless homolog isoform X2 [Vollenhovia emeryi]	5.10038e-102
cont1692	XP_011691119.1: transcription factor GAGA-like isoform X1 [Wasmannia auropunctata]	1.85989e-83
cont1693	XP_011691120.1: protein abrupt-like isoform X2 [Wasmannia auropunctata]	1.08107e-105
cont1694	XP_011056866.1: putative ATP-dependent RNA helicase DHX33 [Acromyrmex echinatior]	0.0
cont1698	XP_011700681.1: exosome complex component RRP40 [Wasmannia auropunctata]	1.64936e-119
cont1700	XP_011068630.1: uncharacterized protein LOC105154654 [Acromyrmex echinatior]	6.82592e-10
cont1702	XP_011175578.1: uncharacterized protein LOC105207693 [Solenopsis invicta]	1.42282e-05
cont1703	XP_011175578.1: uncharacterized protein LOC105207693 [Solenopsis invicta]	1.67523e-06
cont1705	XP_011701635.1: protein UBASH3A homolog [Wasmannia auropunctata]	0.0
cont1708	XP_012221930.1: sestrin-1 isoform X1 [Linepithema humile]	1.99353e-07
cont1709	XP_012538058.1: four and a half LIM domains protein 2 isoform X15 [Monomorium pharaonis]	1.95573e-07
cont1710	XP_012543249.1: uncharacterized protein LOC105840746 [Monomorium pharaonis]	3.20599e-09
cont1711	XP_011872384.1: uncharacterized protein LOC105564549 isoform X2 [Vollenhovia emeryi]	6.29586e-102
cont1712	XP_011870294.1: calmodulin-binding transcription activator 2 isoform X4 [Vollenhovia emeryi]	1.56281e-163
cont1714	XP_011685994.1: zinc finger MYND domain-containing protein 11 isoform X1 [Wasmannia auropunctata]	7.62084e-18
cont1715	XP_011685995.1: zinc finger MYND domain-containing protein 11 isoform X2 [Wasmannia auropunctata]	2.40148e-14
cont1716	XP_011167340.1: myeloid differentiation primary response protein MyD88 [Solenopsis invicta]	0.0
cont1717	XP_015588163.1: CKLF-like MARVEL transmembrane domain-containing protein 4 isoform X1 [Cephus cinctus]	0.0374695
cont1718	XP_011692435.1: activator of basal transcription 1-like [Wasmannia auropunctata]	1.80544e-115
cont1719	XP_014615006.1: ubiquitin carboxyl-terminal hydrolase 22 [Polistes canadensis]	1.94165e-13
cont1722	XP_011688398.1: uncharacterized protein LOC105450312 [Wasmannia auropunctata]	1.82967e-35
cont1723	XP_011862470.1: protein PTHB1 [Vollenhovia emeryi]	0.0
cont1724	XP_012524308.1: probable sulfate transport system permease protein cysT [Monomorium pharaonis]	5.44645e-18
cont1725	XP_011701727.1: serine/threonine-protein kinase 26 [Wasmannia auropunctata]	1.35215e-08
cont1726	XP_013190478.1: retrovirus-related Pol polyprotein from transposon TNT 1-94 [Amyelois transitella]	2.25557e-132
cont1727	XP_011700425.1: uncharacterized protein CG1161 [Wasmannia auropunctata]	3.00085e-60
cont1728	XP_011874587.1: microtubule-associated protein futsch-like isoform X3 [Vollenhovia emeryi]	1.33707e-153
cont1730	XP_011690525.1: ralA-binding protein 1 isoform X2 [Wasmannia auropunctata]	0.0
cont1731	XP_011860711.1: ralA-binding protein 1 [Vollenhovia emeryi]	0.0
cont1732	XP_011860711.1: ralA-binding protein 1 [Vollenhovia emeryi]	0.0
cont1733	XP_012540805.1: uncharacterized protein LOC105839205 [Monomorium pharaonis]	0.0
cont1736	XP_011691788.1: uncharacterized protein LOC105452417 isoform X2 [Wasmannia auropunctata]	1.2983e-33
cont1737	XP_011691788.1: uncharacterized protein LOC105452417 isoform X2 [Wasmannia auropunctata]	2.10994e-33
cont1738	XP_011703957.1: protein THEM6 [Wasmannia auropunctata]	2.46253e-150
cont1739	XP_011172516.1: retrovirus-related Pol polyprotein from transposon TNT 1-94, partial [Solenopsis invicta]	3.4629e-86
cont1742	XP_012525226.1: uncharacterized protein LOC105830451 [Monomorium pharaonis]	6.51641e-10
cont1743	XP_011873017.1: isovaleryl-CoA dehydrogenase, mitochondrial isoform X1 [Vollenhovia emeryi]	0.0
cont1745	XP_012526935.1: uncharacterized protein LOC105831393 [Monomorium pharaonis]	6.74437e-08
cont1746	XP_011697552.1: alpha-tocopherol transfer protein-like, partial [Wasmannia auropunctata]	2.45424e-12
cont1748	XP_011688337.1: uncharacterized protein LOC105450269 [Wasmannia auropunctata]	0.0
cont1749	XP_011688337.1: uncharacterized protein LOC105450269 [Wasmannia auropunctata]	7.0322e-133
cont1750	XP_011867492.1: prostaglandin E synthase 3 [Vollenhovia emeryi]	2.12921e-63
cont1751	XP_011692568.1: transmembrane protein 183-like isoform X1 [Wasmannia auropunctata]	5.48311e-94
cont1752	XP_012061824.1: transmembrane protein 183-like [Atta cephalotes]	4.31888e-120
cont1753	XP_011692570.1: transmembrane protein 183-like isoform X3 [Wasmannia auropunctata]	0.0
cont1755	XP_011304314.1: uncharacterized protein LOC105267279 isoform X1 [Fopius arisanus]	2.00761e-135
cont1756	XP_011695322.1: ribosomal RNA-processing protein 7 homolog A-like [Wasmannia auropunctata]	1.57748e-145
cont1757	XP_011629559.1: peroxidasin [Pogonomyrmex barbatus]	2.94991e-149
cont1759	XP_011063985.1: protein FAM162A isoform X2 [Acromyrmex echinatior]	2.70007e-05
cont1761	XP_011878636.1: mediator of RNA polymerase II transcription subunit 6 [Vollenhovia emeryi]	4.54555e-143
cont1762	XP_011694636.1: protein NPC2 homolog [Wasmannia auropunctata]	1.3417e-19
cont1764	XP_011874230.1: F-box/WD repeat-containing protein 9-like [Vollenhovia emeryi]	2.60774e-72
cont1765	XP_011639712.1: F-box/WD repeat-containing protein 9-like isoform X2 [Pogonomyrmex barbatus]	7.59983e-88
cont1767	XP_011878089.1: uncharacterized protein LOC105567651, partial [Vollenhovia emeryi]	4.736e-36
cont1768	XP_012230176.1: uncharacterized protein LOC105676687 [Linepithema humile]	1.83767e-41
cont1769	XP_012230176.1: uncharacterized protein LOC105676687 [Linepithema humile]	6.64895e-73
cont1770	XP_011693272.1: uncharacterized protein LOC105453214 isoform X1 [Wasmannia auropunctata]	5.46817e-130
cont1771	XP_011873113.1: programmed cell death protein 2-like [Vollenhovia emeryi]	5.66183e-162
cont1772	XP_011872163.1: probable G-protein coupled receptor 158 [Vollenhovia emeryi]	0.0
cont1774	XP_011872047.1: 39S ribosomal protein L35, mitochondrial [Vollenhovia emeryi]	7.53923e-72
cont1775	XP_011169619.1: splicing factor 3A subunit 3 [Solenopsis invicta]	0.0
cont1777	XP_011685652.1: NADH dehydrogenase [ubiquinone] flavoprotein 2, mitochondrial [Wasmannia auropunctata]	1.57712e-167
cont1778	XP_011701331.1: protein asteroid homolog 1-like [Wasmannia auropunctata]	0.0
cont1779	XP_011067462.1: Bardet-Biedl syndrome 7 protein homolog isoform X1 [Acromyrmex echinatior]	0.0
cont1781	XP_011169823.1: UDP-glucuronosyltransferase 2B1-like [Solenopsis invicta]	2.85658e-43
cont1782	XP_011686266.1: heparan sulfate 2-O-sulfotransferase 1 [Wasmannia auropunctata]	0.0
cont1789	XP_011702731.1: probable multidrug resistance-associated protein lethal(2)03659 [Wasmannia auropunctata]	4.30265e-134
cont1792	XP_011066991.1: uncharacterized protein LOC105153689 isoform X2 [Acromyrmex echinatior]	8.51305e-05
cont1793	XP_011165595.1: bromodomain adjacent to zinc finger domain protein 2B [Solenopsis invicta]	8.18296e-24
cont1797	XP_011701421.1: cytochrome P450 4C1-like isoform X2 [Wasmannia auropunctata]	7.8993e-61
cont1798	XP_011690752.1: SCY1-like protein 2 [Wasmannia auropunctata]	0.0
cont1799	XP_013190478.1: retrovirus-related Pol polyprotein from transposon TNT 1-94 [Amyelois transitella]	5.30246e-22
cont1801	XP_011065386.1: uncharacterized protein LOC105152673, partial [Acromyrmex echinatior]	3.64407e-18
cont1803	XP_008188678.1: D-erythrulose kinase-like [Acyrthosiphon pisum]	2.96451e-11
cont1807	XP_016657068.1: uncharacterized protein LOC107882742 [Acyrthosiphon pisum]	5.13308e-57
cont1808	XP_012234502.1: uncharacterized protein LOC105679183 isoform X2 [Linepithema humile]	3.66042e-09
cont1809	XP_011059913.1: HEAT repeat-containing protein 3 [Acromyrmex echinatior]	0.0
cont1810	XP_011630079.1: fibroblast growth factor 1-like isoform X2 [Pogonomyrmex barbatus]	3.53017e-135
cont1811	XP_013399327.1: 40S ribosomal protein S7 [Lingula anatina]	2.46617e-66
cont1812	XP_012535357.1: F-box/WD repeat-containing protein 9-like [Monomorium pharaonis]	3.60048e-111
cont1814	XP_012522379.1: uncharacterized protein LOC105828553 [Monomorium pharaonis]	0.0
cont1816	XP_012060530.1: uncharacterized protein LOC105623762 [Atta cephalotes]	5.23276e-64
cont1817	XP_011881131.1: M-phase phosphoprotein 6 [Vollenhovia emeryi]	1.17204e-62
cont1818	XP_011691941.1: fragile X mental retardation protein 1 homolog A isoform X2 [Wasmannia auropunctata]	0.0
cont1821	XP_011633407.1: dual specificity mitogen-activated protein kinase kinase hemipterous-like isoform X1 [Pogonomyrmex barbatus]	1.58798e-19
cont1822	XP_012534665.1: protein MTO1 homolog, mitochondrial-like [Monomorium pharaonis]	2.2403e-06
cont1823	XP_012534665.1: protein MTO1 homolog, mitochondrial-like [Monomorium pharaonis]	2.02949e-05
cont1824	XP_011696234.1: ragulator complex protein LAMTOR1 [Wasmannia auropunctata]	1.70296e-105
cont1825	XP_017064524.1: ribosomal RNA small subunit methyltransferase B-like [Drosophila eugracilis]	5.09267e-05
cont1826	XP_011700469.1: thyrotropin-releasing hormone receptor isoform X2 [Wasmannia auropunctata]	1.0559e-135
cont1830	XP_015907694.1: stress-activated protein kinase JNK-like [Parasteatoda tepidariorum]	0.0320469
cont1831	XP_011062100.1: vitellogenin receptor-like, partial [Acromyrmex echinatior]	2.10491e-18
cont1834	XP_012521378.1: uncharacterized protein LOC105827798 [Monomorium pharaonis]	0.0
cont1837	XP_011630841.1: polyadenylate-binding protein-like, partial [Pogonomyrmex barbatus]	6.33369e-23
cont1839	XP_012238265.1: leucine-rich repeat-containing protein 16A isoform X4 [Bombus impatiens]	8.57004e-30
cont1841	XP_011636125.1: cytochrome P450 6B2-like, partial [Pogonomyrmex barbatus]	3.23659e-121
cont1842	XP_012522351.1: uncharacterized protein LOC105828532, partial [Monomorium pharaonis]	1.53396e-29
cont1843	XP_012541917.1: sulfate/thiosulfate import ATP-binding protein CysA-like [Monomorium pharaonis]	4.95916e-29
cont1845	XP_011175744.1: coiled-coil domain-containing protein 65 [Solenopsis invicta]	2.79433e-84
cont1847	XP_012524060.1: uncharacterized protein LOC105829602 isoform X3 [Monomorium pharaonis]	1.10196e-48
cont1850	XP_011170475.1: uncharacterized protein LOC105203384, partial [Solenopsis invicta]	7.12969e-117
cont1854	XP_011169744.1: serine/threonine-protein kinase greatwall [Solenopsis invicta]	0.0
cont1857	XP_011694224.1: alpha/beta hydrolase domain-containing protein 11 isoform X2 [Wasmannia auropunctata]	9.90373e-157
cont1859	XP_012054292.1: uncharacterized protein LOC105617339 [Atta cephalotes]	1.35332e-93
cont1860	XP_011064540.1: pre-mRNA-splicing factor SYF1 isoform X7 [Acromyrmex echinatior]	0.0
cont1863	XP_014213600.1: uncharacterized protein LOC106643113 [Copidosoma floridanum]	1.33601e-62
cont1864	XP_011052850.1: sodium- and chloride-dependent GABA transporter 1-like [Acromyrmex echinatior]	0.0
cont1865	XP_011879012.1: transcriptional activator cubitus interruptus [Vollenhovia emeryi]	0.0
cont1866	XP_011687072.1: RNA-directed DNA polymerase from mobile element jockey-like [Wasmannia auropunctata]	1.29699e-150
cont1867	XP_012542297.1: transcription initiation factor IIA subunit 2 [Monomorium pharaonis]	2.45311e-68
cont1868	XP_011165021.1: tumor protein D52 isoform X2 [Solenopsis invicta]	1.69194e-67
cont1869	XP_012535868.1: beta-1,3-galactosyltransferase 5 [Monomorium pharaonis]	0.0
cont1870	XP_012535868.1: beta-1,3-galactosyltransferase 5 [Monomorium pharaonis]	0.0
cont1874	XP_011868187.1: protein YIPF1 [Vollenhovia emeryi]	0.0
cont1877	XP_011878124.1: neuroligin-1 [Vollenhovia emeryi]	0.0
cont1878	XP_011876846.1: uncharacterized protein LOC105566980 [Vollenhovia emeryi]	2.97959e-76
cont1880	XP_011638070.1: alpha-tocopherol transfer protein-like isoform X3 [Pogonomyrmex barbatus]	1.57809e-20
cont1882	XP_011875249.1: developmentally-regulated GTP-binding protein 2 [Vollenhovia emeryi]	0.0
cont1883	XP_011875249.1: developmentally-regulated GTP-binding protein 2 [Vollenhovia emeryi]	0.0
cont1885	XP_011861707.1: uncharacterized protein LOC105558566, partial [Vollenhovia emeryi]	5.24191e-59
cont1889	XP_012524732.1: formin-binding protein 4-like, partial [Monomorium pharaonis]	8.29441e-53
cont1891	XP_011645933.1: uncharacterized protein LOC105432700 isoform X3 [Pogonomyrmex barbatus]	5.40719e-49
cont1894	XP_011567380.1: dnaJ homolog 1, mitochondrial-like [Plutella xylostella]	3.83156e-42
cont1898	XP_011876760.1: dystrophin-like isoform X11 [Vollenhovia emeryi]	0.0
cont1901	XP_011065976.1: uncharacterized protein LOC105153053, partial [Acromyrmex echinatior]	9.75285e-09
cont1902	XP_011882019.1: uncharacterized protein LOC105569853 [Vollenhovia emeryi]	4.97607e-45
cont1903	XP_011174886.1: uncharacterized protein LOC105207145 [Solenopsis invicta]	1.85878e-168
cont1906	XP_011694040.1: LOW QUALITY PROTEIN: NF-kappa-B inhibitor cactus-like [Wasmannia auropunctata]	1.35014e-78
cont1907	XP_011706618.1: uncharacterized protein LOC105461815 [Wasmannia auropunctata]	3.48266e-20
cont1908	XP_012062791.1: talin-1 isoform X2 [Atta cephalotes]	0.0
cont1910	XP_011882869.1: bifunctional glutamate/proline--tRNA ligase [Vollenhovia emeryi]	0.0
cont1911	XP_011063777.1: bifunctional glutamate/proline--tRNA ligase [Acromyrmex echinatior]	0.00254647
cont1915	XP_012225756.1: cyclin-K isoform X2 [Linepithema humile]	4.72787e-57
cont1916	XP_011865269.1: mitochondrial thiamine pyrophosphate carrier [Vollenhovia emeryi]	0.0
cont1918	XP_012539613.1: cytochrome P450 4C1-like [Monomorium pharaonis]	0.0
cont1919	XP_011158156.1: venom acid phosphatase Acph-1-like [Solenopsis invicta]	0.0
cont1920	XP_011703039.1: venom acid phosphatase Acph-1-like isoform X2 [Wasmannia auropunctata]	0.0
cont1921	XP_011873054.1: CCR4-NOT transcription complex subunit 7 isoform X1 [Vollenhovia emeryi]	0.0
cont1923	XP_011635434.1: UDP-N-acetylglucosamine--peptide N-acetylglucosaminyltransferase 110 kDa subunit [Pogonomyrmex barbatus]	1.91358e-45
cont1924	XP_005108692.1: uncharacterized protein LOC101863378 [Aplysia californica]	4.64919e-06
cont1925	XP_012533763.1: protein kinase C theta type-like [Monomorium pharaonis]	2.59202e-126
cont1928	XP_011879206.1: ankyrin repeat domain-containing protein 12 isoform X1 [Vollenhovia emeryi]	4.48002e-59
cont1931	XP_011698170.1: glutathione S-transferase-like [Wasmannia auropunctata]	8.90285e-33
cont1933	YP_009115382.1| cytochrome c oxidase subunit I (mitochondrion) [Myrmica scabrinodis]	0.0
cont1934	XP_011639443.1: caspase Nc isoform X2 [Pogonomyrmex barbatus]	0.0
cont1936	XP_011056192.1: putative elongator complex protein 1 isoform X5 [Acromyrmex echinatior]	4.69493e-138
cont1938	XP_011196283.1: caspase-like [Bactrocera cucurbitae]	4.52608e-49
cont1939	XP_014470308.1: caspase-1-like isoform X2 [Dinoponera quadriceps]	2.24112e-28
cont1940	XP_011863211.1: protein retinal degeneration B isoform X7 [Vollenhovia emeryi]	0.0
cont1941	XP_014760162.1| uncharacterized protein Dana_GF27899 [Drosophila ananassae]	8.55305e-126
cont1946	XP_009169137.1| hypothetical protein T265_05779 [Opisthorchis viverrini]	4.41661e-14
cont1948	XP_012061360.1: 60S ribosomal protein L10a [Atta cephalotes]	1.59974e-84
cont1949	XP_015108357.1: epidermal growth factor receptor kinase substrate 8-like [Diachasma alloeum]	6.28125e-07
cont1952	XP_011871114.1: guanine nucleotide-binding protein G(i) subunit alpha isoform X1 [Vollenhovia emeryi]	0.0
cont1953	XP_011702289.1: uncharacterized protein LOC105458563 isoform X2 [Wasmannia auropunctata]	2.28168e-32
cont1954	XP_011702289.1: uncharacterized protein LOC105458563 isoform X2 [Wasmannia auropunctata]	3.03741e-28
cont1957	XP_013175214.1: protein turtle-like [Papilio xuthus]	4.53191e-62
cont1964	XP_011860324.1: 1,5-anhydro-D-fructose reductase isoform X1 [Vollenhovia emeryi]	4.32801e-26
cont1965	XP_011699829.1: phosphomannomutase [Wasmannia auropunctata]	4.59117e-172
cont1966	XP_011699829.1: phosphomannomutase [Wasmannia auropunctata]	9.44104e-157
cont1971	XP_011697355.1: zinc finger protein 493-like [Wasmannia auropunctata]	0.0
cont1972	XP_011163136.1: uncharacterized protein LOC105198181 [Solenopsis invicta]	0.000428038
cont1975	XP_011158093.1: tRNA-specific adenosine deaminase 1 isoform X1 [Solenopsis invicta]	0.0
cont1976	XP_011064536.1: pre-mRNA-splicing factor SYF1 isoform X4 [Acromyrmex echinatior]	3.68405e-99
cont1977	XP_011707994.1: pyrroline-5-carboxylate reductase 1, mitochondrial isoform X1 [Wasmannia auropunctata]	6.81794e-163
cont1978	XP_011865403.1: uncharacterized protein LOC105560690, partial [Vollenhovia emeryi]	9.91407e-99
cont1979	XP_013780764.1: LOW QUALITY PROTEIN: probable D-lactate dehydrogenase, mitochondrial [Limulus polyphemus]	9.77161e-09
cont1981	XP_011686879.1: protein Skeletor, isoforms B/C [Wasmannia auropunctata]	0.0
cont1982	XP_011880975.1: uncharacterized protein LOC105569261 isoform X1 [Vollenhovia emeryi]	1.77836e-36
cont1983	XP_012531750.1: mitochondrial chaperone BCS1 isoform X2 [Monomorium pharaonis]	3.88994e-91
cont1984	XP_012064082.1: LOW QUALITY PROTEIN: putative fatty acyl-CoA reductase CG5065 [Atta cephalotes]	7.94373e-47
cont1986	XP_011173491.1: transient receptor potential cation channel protein painless-like [Solenopsis invicta]	1.60699e-133
cont1991	XP_011884090.1: uncharacterized protein LOC105571232 [Vollenhovia emeryi]	1.30462e-17
cont1998	XP_012215758.1: hormone receptor 4-like isoform X2 [Linepithema humile]	1.38986e-44
cont2000	XP_011868460.1: uncharacterized protein LOC105562324, partial [Vollenhovia emeryi]	7.83839e-87
cont2003	XP_011882019.1: uncharacterized protein LOC105569853 [Vollenhovia emeryi]	9.12746e-54
cont2004	XP_011701948.1: phospholipase ABHD3 [Wasmannia auropunctata]	2.34985e-47
cont2005	XP_011701625.1: transcription initiation factor IIB [Wasmannia auropunctata]	0.0
cont2008	XP_012532658.1: binder of USO1 and GRH1 protein 1-like [Monomorium pharaonis]	0.00619188
cont2012	XP_011858704.1: uncharacterized protein LOC105556230, partial [Vollenhovia emeryi]	7.46978e-20
cont2014	XP_012274112.1: LIM and SH3 domain protein Lasp isoform X2 [Orussus abietinus]	9.64272e-13
cont2015	XP_008202551.2: carboxypeptidase Q [Nasonia vitripennis]	0.0426411
cont2016	XP_012349427.1: uncharacterized protein LOC105736981 [Apis florea]	8.41855e-28
cont2017	XP_009020916.1| hypothetical protein HELRODRAFT_93044, partial [Helobdella robusta]	1.90833e-14
cont2018	XP_012141036.1: uncharacterized protein LOC100876911 isoform X2 [Megachile rotundata]	2.26262e-08
cont2019	XP_003492996.1: chaperonin CPN60-2, mitochondrial-like [Bombus impatiens]	1.08167e-69
cont2022	XP_011689599.1: protein PRRC2C isoform X6 [Wasmannia auropunctata]	1.16186e-05
cont2023	XP_012531277.1: uncharacterized protein LOC105833810 [Monomorium pharaonis]	0.0629055
cont2024	XP_012056687.1: CDK5RAP1-like protein [Atta cephalotes]	0.0
cont2026	XP_011161238.1: sulfide:quinone oxidoreductase, mitochondrial [Solenopsis invicta]	0.0
cont2028	XP_011693318.1: glutamate receptor ionotropic, delta-1-like isoform X2 [Wasmannia auropunctata]	7.72089e-165
cont2029	XP_012524790.1: peroxiredoxin-like [Monomorium pharaonis]	1.24188e-106
cont2030	XP_011869630.1: bromodomain adjacent to zinc finger domain protein 1A isoform X4 [Vollenhovia emeryi]	0.0
cont2031	XP_012530497.1: uncharacterized protein LOC105833352 [Monomorium pharaonis]	7.08558e-159
cont2032	XP_011878223.1: protein ECT2 isoform X1 [Vollenhovia emeryi]	0.0
cont2033	XP_012055311.1: protein ECT2 [Atta cephalotes]	0.0
cont2034	XP_011705917.1: cytochrome P450 9e2-like [Wasmannia auropunctata]	6.35696e-21
cont2035	XP_011862304.1: probable methylthioribulose-1-phosphate dehydratase [Vollenhovia emeryi]	1.09577e-60
cont2036	XP_011067114.1: NADH dehydrogenase [ubiquinone] 1 alpha subcomplex subunit 9, mitochondrial-like [Acromyrmex echinatior]	0.0
cont2037	XP_011872611.1: structural maintenance of chromosomes protein 1A [Vollenhovia emeryi]	0.0
cont2038	XP_011872611.1: structural maintenance of chromosomes protein 1A [Vollenhovia emeryi]	0.0
cont2040	XP_011870645.1: hemolymph lipopolysaccharide-binding protein-like [Vollenhovia emeryi]	2.01126e-161
cont2041	XP_012061430.1: integral membrane protein GPR155 [Atta cephalotes]	1.56679e-08
cont2043	XP_011636603.1: uncharacterized protein LOC105426888 [Pogonomyrmex barbatus]	1.09362e-16
cont2044	XP_011635953.1: 60S ribosomal protein L7 [Pogonomyrmex barbatus]	2.55177e-157
cont2046	XP_011164940.1: protein tincar isoform X2 [Solenopsis invicta]	0.0
cont2047	XP_011164934.1: protein tincar isoform X1 [Solenopsis invicta]	0.0
cont2048	XP_012224574.1: THAP domain-containing protein 1-like [Linepithema humile]	6.0532e-12
cont2049	XP_012224574.1: THAP domain-containing protein 1-like [Linepithema humile]	1.20603e-11
cont2052	XP_011685120.1: CB1 cannabinoid receptor-interacting protein 1-like [Wasmannia auropunctata]	2.32371e-108
cont2053	XP_011685120.1: CB1 cannabinoid receptor-interacting protein 1-like [Wasmannia auropunctata]	1.87479e-59
cont2054	XP_012226626.1: ras-related protein Rab-10 isoform X2 [Linepithema humile]	8.08903e-91
cont2055	XP_006560049.1: ras-related protein Rab-10 isoform X2 [Apis mellifera]	1.84996e-14
cont2056	XP_012542391.1: DDB1- and CUL4-associated factor 11 [Monomorium pharaonis]	5.17623e-10
cont2057	XP_011878533.1: gamma-soluble NSF attachment protein-like [Vollenhovia emeryi]	1.24389e-29
cont2058	XP_012062751.1: gamma-soluble NSF attachment protein-like [Atta cephalotes]	3.97738e-172
cont2059	XP_012220108.1: 60S ribosomal protein L4 [Linepithema humile]	1.9683e-23
cont2060	XP_011877585.1: procollagen-lysine,2-oxoglutarate 5-dioxygenase 3 [Vollenhovia emeryi]	0.0
cont2061	XP_011865859.1: putative sodium-coupled neutral amino acid transporter 7 [Vollenhovia emeryi]	0.0
cont2062	XP_011865860.1: E3 ubiquitin-protein ligase RNF123-like isoform X1 [Vollenhovia emeryi]	0.0
cont2063	XP_011646068.1: protein CLP1 homolog [Pogonomyrmex barbatus]	0.0
cont2064	XP_012532225.1: putative glutathione-specific gamma-glutamylcyclotransferase 2 [Monomorium pharaonis]	3.90754e-117
cont2065	XP_012060998.1: 60S ribosomal protein L12 [Atta cephalotes]	2.05047e-66
cont2068	XP_011167020.1: neurogenic protein mastermind-like [Solenopsis invicta]	3.09109e-59
cont2070	XP_011636476.1: uncharacterized protein LOC105426784 [Pogonomyrmex barbatus]	1.81387e-76
cont2071	XP_011883142.1: gamma-tubulin complex component 2-like isoform X1 [Vollenhovia emeryi]	4.71249e-83
cont2072	XP_012064589.1: uncharacterized protein LOC105627927 [Atta cephalotes]	0.0
cont2075	XP_011880146.1: U7 snRNA-associated Sm-like protein LSm10 [Vollenhovia emeryi]	3.43379e-47
cont2076	XP_011684841.1: FAD synthase-like isoform X1 [Wasmannia auropunctata]	0.0
cont2078	XP_011684841.1: FAD synthase-like isoform X1 [Wasmannia auropunctata]	0.0
cont2079	XP_011864223.1: GPI transamidase component PIG-T [Vollenhovia emeryi]	0.0
cont2084	XP_012540658.1: cAMP-regulated phosphoprotein 21 isoform X4 [Monomorium pharaonis]	0.0
cont2085	XP_012540658.1: cAMP-regulated phosphoprotein 21 isoform X4 [Monomorium pharaonis]	0.0
cont2086	XP_011172915.1: regulatory-associated protein of mTOR-like [Solenopsis invicta]	1.47294e-110
cont2087	XP_011698529.1: uncharacterized protein LOC105456283 [Wasmannia auropunctata]	3.20619e-164
cont2089	XP_011883412.1: uncharacterized protein LOC105570650 [Vollenhovia emeryi]	1.4338e-164
cont2090	XP_011870000.1: uncharacterized protein LOC105563215 isoform X1 [Vollenhovia emeryi]	3.26188e-08
cont2091	XP_011867279.1: sodium-dependent phosphate transport protein 1, chloroplastic-like [Vollenhovia emeryi]	0.0
cont2092	XP_011867279.1: sodium-dependent phosphate transport protein 1, chloroplastic-like [Vollenhovia emeryi]	1.67552e-155
cont2093	XP_011694864.1: sodium-coupled monocarboxylate transporter 1-like [Wasmannia auropunctata]	0.0
cont2094	XP_011694864.1: sodium-coupled monocarboxylate transporter 1-like [Wasmannia auropunctata]	4.99002e-117
cont2097	XP_012154408.1: mitochondrial Rho GTPase isoform X3 [Megachile rotundata]	0.185244
cont2098	XP_012531232.1: RNA-binding protein 24-like isoform X3 [Monomorium pharaonis]	3.24286e-104
cont2100	XP_011162566.1: single-minded homolog 2 [Solenopsis invicta]	1.0358e-168
cont2101	XP_011162566.1: single-minded homolog 2 [Solenopsis invicta]	2.23539e-15
cont2102	XP_012223555.1: adiponectin receptor protein [Linepithema humile]	0.0
cont2103	XP_011159588.1: ATP-dependent DNA helicase 2 subunit 1-like [Solenopsis invicta]	6.58497e-66
cont2104	XP_011860011.1: ATP-dependent DNA helicase 2 subunit 1-like [Vollenhovia emeryi]	4.39932e-174
cont2105	XP_011864317.1: echinoderm microtubule-associated protein-like CG42247 isoform X1 [Vollenhovia emeryi]	0.0
cont2106	XP_011636416.1: uncharacterized protein LOC105426739 [Pogonomyrmex barbatus]	1.27819e-18
cont2108	XP_012521946.1: uncharacterized protein LOC105828248 [Monomorium pharaonis]	1.00214e-10
cont2109	XP_016661496.1: uncharacterized protein LOC107884274 [Acyrthosiphon pisum]	3.49813e-46
cont2111	XP_012527207.1: coronin-6 [Monomorium pharaonis]	8.39622e-131
cont2112	XP_012522281.1: uncharacterized protein LOC105828482 isoform X2 [Monomorium pharaonis]	0.0
cont2113	XP_012057602.1: ankyrin repeat domain-containing protein 13D [Atta cephalotes]	0.0
cont2114	XP_011686040.1: probable glutamate--tRNA ligase, mitochondrial [Wasmannia auropunctata]	0.0
cont2115	XP_011686040.1: probable glutamate--tRNA ligase, mitochondrial [Wasmannia auropunctata]	0.0
cont2116	XP_011686040.1: probable glutamate--tRNA ligase, mitochondrial [Wasmannia auropunctata]	0.0
cont2118	XP_011704010.1: nuclear valosin-containing protein-like [Wasmannia auropunctata]	0.0
cont2120	XP_011055423.1: replication factor C subunit 1 isoform X1 [Acromyrmex echinatior]	2.10652e-69
cont2124	XP_012539206.1: hybrid signal transduction histidine kinase L, partial [Monomorium pharaonis]	6.08117e-10
cont2125	XP_011880936.1: GTP-binding protein RAD isoform X2 [Vollenhovia emeryi]	7.48831e-120
cont2126	XP_011687040.1: transcriptional repressor protein YY1-like [Wasmannia auropunctata]	9.47801e-74
cont2127	XP_011700125.1: putative uncharacterized protein DDB_G0282129 isoform X2 [Wasmannia auropunctata]	0.0
cont2129	XP_011053707.1: protein phosphatase 1 regulatory subunit 12A isoform X4 [Acromyrmex echinatior]	3.12971e-37
cont2132	XP_014358272.1: uncharacterized protein LOC106710659 [Papilio machaon]	1.70594e-146
cont2133	XP_014358272.1: uncharacterized protein LOC106710659 [Papilio machaon]	8.05667e-120
cont2134	XP_011162952.1: transcription factor Sp9 [Solenopsis invicta]	4.54606e-12
cont2136	XP_011862334.1: uncharacterized protein LOC105558966 [Vollenhovia emeryi]	1.14248e-137
cont2137	XP_009163443.1| hypothetical protein T265_12739, partial [Opisthorchis viverrini]	2.18685e-08
cont2141	XP_011699325.1: alanine aminotransferase 2-like isoform X2 [Wasmannia auropunctata]	0.000196785
cont2142	XP_012058575.1: alanine aminotransferase 1-like [Atta cephalotes]	2.42211e-18
cont2143	XP_011872745.1: golgin-84-like isoform X2 [Vollenhovia emeryi]	1.53283e-106
cont2144	XP_015834404.1: retrovirus-related Pol polyprotein from transposon 17.6 isoform X4 [Tribolium castaneum]	0.0
cont2145	XP_015117082.1: glucose transporter type 1 isoform X9 [Diachasma alloeum]	7.94684e-15
cont2147	XP_016665154.1: uncharacterized protein LOC107885903 [Acyrthosiphon pisum]	3.68499e-31
cont2148	XP_012533843.1: uncharacterized protein LOC105835274 [Monomorium pharaonis]	5.33291e-25
cont2150	XP_011700298.1: thiamine transporter 2-like isoform X2 [Wasmannia auropunctata]	1.33593e-36
cont2152	XP_011161522.1: general odorant-binding protein 71 [Solenopsis invicta]	1.42249e-71
cont2153	XP_011645917.1: endonuclease G, mitochondrial [Pogonomyrmex barbatus]	3.03482e-155
cont2154	XP_012543057.1: ATP synthase lipid-binding protein, mitochondrial [Monomorium pharaonis]	1.2211e-56
cont2155	XP_011160880.1: forkhead box protein J1-A-like [Solenopsis invicta]	3.70943e-126
cont2156	XP_011166303.1: uncharacterized protein LOC105200446 isoform X1 [Solenopsis invicta]	0.000342017
cont2157	XP_012526136.1: N-(5-amino-5-carboxypentanoyl)-L-cysteinyl-D-valine synthase [Monomorium pharaonis]	0.000124578
cont2158	XP_011165813.1: N-(5-amino-5-carboxypentanoyl)-L-cysteinyl-D-valine synthase [Solenopsis invicta]	5.93748e-07
cont2161	XP_012056480.1: ubiquitin carboxyl-terminal hydrolase 10 [Atta cephalotes]	0.0
cont2162	XP_012543129.1: uncharacterized protein LOC105840667 [Monomorium pharaonis]	3.72095e-52
cont2164	XP_011057530.1: protein FAM45B-like [Acromyrmex echinatior]	9.83268e-78
cont2167	XP_011864738.1: FYVE, RhoGEF and PH domain-containing protein 4-like isoform X1 [Vollenhovia emeryi]	0.0
cont2169	XP_012218586.1: CTD nuclear envelope phosphatase 1 homolog isoform X2 [Linepithema humile]	1.48411e-162
cont2170	XP_011690208.1: glutamate--cysteine ligase regulatory subunit [Wasmannia auropunctata]	2.1941e-43
cont2174	XP_012274835.1: putative nuclease HARBI1 [Orussus abietinus]	4.21394e-60
cont2175	XP_011858777.1: putative nuclease HARBI1, partial [Vollenhovia emeryi]	5.702e-60
cont2178	XP_011690027.1: uncharacterized protein LOC105451350 isoform X1 [Wasmannia auropunctata]	3.94198e-116
cont2179	XP_011875638.1: uncharacterized protein LOC105566333 [Vollenhovia emeryi]	1.33854e-27
cont2180	XP_011875638.1: uncharacterized protein LOC105566333 [Vollenhovia emeryi]	7.50116e-47
cont2181	XP_012214704.1: calcium uptake protein 1 homolog, mitochondrial isoform X3 [Linepithema humile]	0.0
cont2183	XP_012528406.1: calcium-binding mitochondrial carrier protein Aralar1-like [Monomorium pharaonis]	5.12243e-165
cont2184	XP_011642139.1: calcium-binding mitochondrial carrier protein Aralar1 isoform X7 [Pogonomyrmex barbatus]	1.91369e-100
cont2185	XP_011862576.1: calcium-binding mitochondrial carrier protein Aralar1 isoform X6 [Vollenhovia emeryi]	9.61071e-22
cont2186	XP_012229806.1: calcium-binding mitochondrial carrier protein Aralar1 isoform X3 [Linepithema humile]	0.0
cont2187	XP_011861269.1: serine/arginine repetitive matrix protein 2-like [Vollenhovia emeryi]	0.0
cont2188	XP_011155708.1: calcium-binding mitochondrial carrier protein Aralar1 isoform X1 [Solenopsis invicta]	0.0
cont2189	XP_011155708.1: calcium-binding mitochondrial carrier protein Aralar1 isoform X1 [Solenopsis invicta]	0.0
cont2195	XP_011687449.1: uncharacterized protein LOC105449763 [Wasmannia auropunctata]	1.8113e-07
cont2196	XP_012537409.1: uncharacterized protein LOC105837304 [Monomorium pharaonis]	1.36475e-90
cont2197	XP_011875880.1: eukaryotic translation initiation factor 3 subunit H [Vollenhovia emeryi]	0.0
cont2198	XP_011861774.1: uncharacterized protein LOC105558604 [Vollenhovia emeryi]	5.51874e-120
cont2199	XP_011861774.1: uncharacterized protein LOC105558604 [Vollenhovia emeryi]	4.97179e-113
cont2200	XP_011864257.1: AP-1 complex subunit gamma-1 isoform X8 [Vollenhovia emeryi]	0.0
cont2201	XP_011058951.1: endothelin-converting enzyme 1-like isoform X2 [Acromyrmex echinatior]	1.4967e-61
cont2202	XP_013198317.1: aldose reductase-like, partial [Amyelois transitella]	2.77719e-06
cont2203	XP_011687190.1: TRAF3-interacting protein 1 [Wasmannia auropunctata]	0.0
cont2204	XP_012542497.1: uncharacterized protein LOC105840177 [Monomorium pharaonis]	0.00210523
cont2205	XP_011703006.1: sodium/potassium-transporting ATPase subunit beta-2-like [Wasmannia auropunctata]	3.34939e-36
cont2206	XP_011703006.1: sodium/potassium-transporting ATPase subunit beta-2-like [Wasmannia auropunctata]	2.15367e-08
cont2210	XP_012062380.1: uncharacterized protein LOC105625667 [Atta cephalotes]	4.24324e-41
cont2214	XP_011643356.1: protein disulfide-isomerase TMX3 isoform X1 [Pogonomyrmex barbatus]	0.0
cont2215	XP_011872090.1: uncharacterized protein T19C3.4-like isoform X2 [Vollenhovia emeryi]	2.06216e-64
cont2216	XP_011872090.1: uncharacterized protein T19C3.4-like isoform X2 [Vollenhovia emeryi]	3.08426e-41
cont2217	XP_011641613.1: uncharacterized protein LOC105430009 isoform X3 [Pogonomyrmex barbatus]	8.86732e-91
cont2218	XP_011704768.1: alpha-tocopherol transfer protein-like isoform X2 [Wasmannia auropunctata]	2.96555e-10
cont2220	XP_015044791.1| uncharacterized protein Dyak_GE27401 [Drosophila yakuba]	1.47218e-06
cont2221	XP_011055331.1: excitatory amino acid transporter isoform X1 [Acromyrmex echinatior]	0.0
cont2223	XP_011157689.1: WD repeat-containing protein 55 homolog [Solenopsis invicta]	0.0
cont2228	XP_011689564.1: AN1-type zinc finger protein 2A [Wasmannia auropunctata]	4.0565e-124
cont2229	XP_012537479.1: glycerol-3-phosphate acyltransferase 1, mitochondrial isoform X3 [Monomorium pharaonis]	1.68968e-07
cont2231	XP_011879335.1: uncharacterized protein LOC105568344 [Vollenhovia emeryi]	8.36619e-158
cont2236	XP_011156244.1: congested-like trachea protein [Solenopsis invicta]	2.1698e-124
cont2238	XP_011860522.1: trafficking protein particle complex subunit 3 [Vollenhovia emeryi]	8.50761e-118
cont2241	XP_011875838.1: uncharacterized protein LOC105566443 [Vollenhovia emeryi]	4.58257e-44
cont2242	XP_011162163.1: DDB1- and CUL4-associated factor 8-like isoform X1 [Solenopsis invicta]	0.0
cont2243	XP_011701212.1: fatty acyl-CoA reductase 1-like [Wasmannia auropunctata]	2.79087e-110
cont2244	XP_011859007.1: uncharacterized protein LOC105556520 [Vollenhovia emeryi]	4.41075e-83
cont2245	XP_011693667.1: zinc finger protein 845-like isoform X1 [Wasmannia auropunctata]	0.0
cont2246	XP_014365991.1: uncharacterized protein LOC106716864 [Papilio machaon]	8.40851e-12
cont2247	XP_012540473.1: putative nuclease HARBI1 [Monomorium pharaonis]	4.0599e-117
cont2249	XP_011872972.1: CTP synthase isoform X2 [Vollenhovia emeryi]	0.0
cont2250	XP_011701723.1: presqualene diphosphate phosphatase-like [Wasmannia auropunctata]	2.69481e-119
cont2251	XP_011872174.1: protein espinas-like [Vollenhovia emeryi]	0.0
cont2252	XP_012527327.1: DNA ligase 1-like, partial [Monomorium pharaonis]	0.0
cont2253	XP_011701882.1: origin recognition complex subunit 4 isoform X1 [Wasmannia auropunctata]	0.0
cont2254	XP_011066639.1: DNA replication licensing factor Mcm2 [Acromyrmex echinatior]	0.0
cont2255	XP_011169432.1: protein scabrous-like [Solenopsis invicta]	0.0
cont2256	XP_011860074.1: aminopeptidase N-like isoform X1 [Vollenhovia emeryi]	0.00531723
cont2258	XP_011858704.1: uncharacterized protein LOC105556230, partial [Vollenhovia emeryi]	0.00569663
cont2260	XP_014475879.1: THAP domain-containing protein 4-like [Dinoponera quadriceps]	4.1933e-12
cont2262	XP_011707591.1: fatty acid synthase-like [Wasmannia auropunctata]	3.04793e-22
cont2263	XP_011156303.1: uncharacterized protein LOC105193525 [Solenopsis invicta]	2.79894e-69
cont2267	XP_011157298.1: glutaredoxin-C4-like isoform X1 [Solenopsis invicta]	3.79323e-16
cont2268	XP_011687628.1: LOW QUALITY PROTEIN: cysteine-rich protein 2-binding protein-like [Wasmannia auropunctata]	2.50271e-61
cont2271	XP_012538354.1: THAP domain-containing protein 1 A-like [Monomorium pharaonis]	9.51078e-19
cont2272	XP_011169286.1: protein tumorous imaginal discs, mitochondrial-like isoform X1 [Solenopsis invicta]	1.13211e-26
cont2273	XP_012525625.1: probable methylmalonate-semialdehyde dehydrogenase [acylating], mitochondrial [Monomorium pharaonis]	2.22609e-46
cont2274	XP_011882555.1: uncharacterized protein LOC105570170 isoform X1 [Vollenhovia emeryi]	0.000556412
cont2275	XP_012527551.1: uncharacterized protein LOC105831729 isoform X9 [Monomorium pharaonis]	0.0
cont2276	XP_012527549.1: uncharacterized protein LOC105831729 isoform X8 [Monomorium pharaonis]	0.0
cont2277	XP_011064025.1: uncharacterized protein LOC105151802 isoform X2 [Acromyrmex echinatior]	0.0
cont2278	XP_011702976.1: uncharacterized protein LOC105459013 [Wasmannia auropunctata]	2.67079e-103
cont2279	XP_011687436.1: uncharacterized protein LOC105449750 [Wasmannia auropunctata]	0.0
cont2280	XP_011693615.1: protein tyrosine phosphatase domain-containing protein 1-like isoform X1 [Wasmannia auropunctata]	0.0
cont2282	XP_011055148.1: DNA repair and recombination protein RAD54-like [Acromyrmex echinatior]	0.0
cont2283	XP_011693405.1: nuclear receptor coactivator 2 isoform X8 [Wasmannia auropunctata]	1.77801e-18
cont2284	XP_012059607.1: LOW QUALITY PROTEIN: nuclear receptor coactivator 2 [Atta cephalotes]	4.17164e-23
cont2285	XP_011647168.1: nuclear receptor coactivator 2 isoform X2 [Pogonomyrmex barbatus]	6.29785e-32
cont2286	XP_011694371.1: plasma membrane calcium-transporting ATPase 2 [Wasmannia auropunctata]	2.09543e-61
cont2287	XP_011874254.1: plasma membrane calcium-transporting ATPase 2 isoform X1 [Vollenhovia emeryi]	0.0
cont2288	XP_011870530.1: probable cytochrome P450 6a20 [Vollenhovia emeryi]	1.35762e-05
cont2289	XP_011639404.1: probable cytochrome P450 6a14 [Pogonomyrmex barbatus]	1.08594e-52
cont2290	XP_011865436.1: probable cytochrome P450 6a14 [Vollenhovia emeryi]	4.04952e-50
cont2291	XP_011872286.1: kinesin-like protein Klp10A isoform X7 [Vollenhovia emeryi]	2.49004e-97
cont2293	XP_011865081.1: NEDD8-activating enzyme E1 catalytic subunit [Vollenhovia emeryi]	6.50875e-44
cont2295	XP_011865652.1: phosphatidylinositide phosphatase SAC1 isoform X2 [Vollenhovia emeryi]	0.0
cont2296	XP_011641408.1: LOW QUALITY PROTEIN: very long-chain specific acyl-CoA dehydrogenase, mitochondrial-like [Pogonomyrmex barbatus]	2.80592e-44
cont2298	XP_011690235.1: serum response factor-binding protein 1 [Wasmannia auropunctata]	4.9054e-165
cont2299	XP_012538364.1: odorant receptor 4-like isoform X1 [Monomorium pharaonis]	1.98009e-14
cont2301	XP_014473063.1: 40S ribosomal protein S24 [Dinoponera quadriceps]	7.91901e-35
cont2302	XP_011684914.1: breast cancer anti-estrogen resistance protein 3-like isoform X1 [Wasmannia auropunctata]	0.0
cont2303	XP_011055569.1: eukaryotic translation initiation factor 2-alpha kinase 4 isoform X1 [Acromyrmex echinatior]	0.0
cont2304	XP_011694995.1: chromatin assembly factor 1 subunit A-B [Wasmannia auropunctata]	0.0
cont2305	XP_011694995.1: chromatin assembly factor 1 subunit A-B [Wasmannia auropunctata]	0.0
cont2307	XP_011691959.1: TATA box-binding protein-associated factor RNA polymerase I subunit B [Wasmannia auropunctata]	0.0
cont2308	XP_011876560.1: arginyl-tRNA--protein transferase 1 isoform X1 [Vollenhovia emeryi]	1.25532e-120
cont2309	XP_011876560.1: arginyl-tRNA--protein transferase 1 isoform X1 [Vollenhovia emeryi]	0.0
cont2310	XP_011876560.1: arginyl-tRNA--protein transferase 1 isoform X1 [Vollenhovia emeryi]	1.03796e-161
cont2311	XP_011706216.1: microtubule-associated protein futsch isoform X2 [Wasmannia auropunctata]	2.2977e-27
cont2312	XP_011050820.1: protein hu-li tai shao isoform X3 [Acromyrmex echinatior]	6.73323e-108
cont2313	XP_011876424.1: NHL repeat-containing protein 2 [Vollenhovia emeryi]	0.0
cont2314	XP_011876424.1: NHL repeat-containing protein 2 [Vollenhovia emeryi]	0.0
cont2317	XP_011875510.1: tyrosine-protein phosphatase non-receptor type 23 [Vollenhovia emeryi]	0.0
cont2318	XP_012055267.1: amidophosphoribosyltransferase-like [Atta cephalotes]	1.00472e-167
cont2319	XP_012055267.1: amidophosphoribosyltransferase-like [Atta cephalotes]	3.97411e-05
cont2321	XP_015609876.1: uncharacterized protein LOC107274834 [Cephus cinctus]	1.1775e-11
cont2322	XP_015609876.1: uncharacterized protein LOC107274834 [Cephus cinctus]	1.09459e-10
cont2325	XP_011687331.1: transcriptional activator protein Pur-beta isoform X3 [Wasmannia auropunctata]	5.22221e-52
cont2326	XP_011687331.1: transcriptional activator protein Pur-beta isoform X3 [Wasmannia auropunctata]	2.09858e-50
cont2327	XP_012537462.1: defensin-2-like [Monomorium pharaonis]	3.93998e-28
cont2329	XP_011644207.1: suppressor of lurcher protein 1 isoform X1 [Pogonomyrmex barbatus]	0.0
cont2330	XP_016903976.1: zinc finger protein 273-like [Apis cerana]	4.97301e-30
cont2333	XP_011879211.1: sulfatase-modifying factor 1 [Vollenhovia emeryi]	6.40328e-131
cont2335	XP_011879211.1: sulfatase-modifying factor 1 [Vollenhovia emeryi]	0.0
cont2337	XP_012215826.1: baculoviral IAP repeat-containing protein 7-A-like, partial [Linepithema humile]	1.2008e-23
cont2338	XP_011860302.1: flavin reductase (NADPH) isoform X2 [Vollenhovia emeryi]	5.08095e-113
cont2339	XP_011159016.1: transmembrane protein 98-like [Solenopsis invicta]	3.34209e-62
cont2340	XP_012527361.1: glycine-rich protein DOT1-like [Monomorium pharaonis]	3.2707e-14
cont2342	XP_011869306.1: THO complex subunit 6 homolog [Vollenhovia emeryi]	0.0
cont2343	XP_011869306.1: THO complex subunit 6 homolog [Vollenhovia emeryi]	0.0
cont2344	XP_011645923.1: THO complex subunit 6 homolog [Pogonomyrmex barbatus]	0.0
cont2345	XP_011687530.1: cytoplasmic tRNA 2-thiolation protein 1 [Wasmannia auropunctata]	0.0
cont2346	XP_015586175.1: NEDD8-conjugating enzyme Ubc12 [Cephus cinctus]	1.15136e-20
cont2347	XP_011053086.1: uncharacterized protein LOC105145320 isoform X1 [Acromyrmex echinatior]	8.54137e-56
cont2350	XP_016920857.1: putative RNA-binding protein Luc7-like 2 [Apis cerana]	5.75132e-24
cont2352	XP_011880715.1: homeobox protein SAX-1 [Vollenhovia emeryi]	2.5806e-33
cont2355	XP_011174099.1: uncharacterized protein LOC105206291 [Solenopsis invicta]	2.66367e-10
cont2357	XP_015591473.1: uncharacterized protein LOC107265982 [Cephus cinctus]	4.39085e-13
cont2358	XP_011645066.1: rho GTPase-activating protein 21-A isoform X3 [Pogonomyrmex barbatus]	0.0308306
cont2359	XP_011705173.1: uncharacterized protein LOC105460427 [Wasmannia auropunctata]	1.39974e-77
cont2360	XP_016968439.1: probable NADP-dependent mannitol dehydrogenase [Drosophila biarmipes]	4.69299e-66
cont2362	XP_014220294.1: uncharacterized protein LOC106648128 [Trichogramma pretiosum]	1.93177e-40
cont2365	XP_003728909.1: methylsterol monooxygenase 1 [Strongylocentrotus purpuratus]	2.7163e-13
cont2367	XP_011640988.1: short-chain dehydrogenase/reductase family 16C member 6-like [Pogonomyrmex barbatus]	2.17928e-160
cont2369	XP_011705483.1: lipopolysaccharide-induced tumor necrosis factor-alpha factor homolog [Wasmannia auropunctata]	6.36336e-35
cont2371	XP_009028190.1| hypothetical protein HELRODRAFT_186077 [Helobdella robusta]	5.15407e-110
cont2378	XP_017118474.1: 3-oxoacyl-[acyl-carrier-protein] synthase 3-like [Drosophila elegans]	2.66795e-09
cont2381	XP_011636549.1: LOW QUALITY PROTEIN: MTSS1-like protein [Pogonomyrmex barbatus]	0.0
cont2382	XP_011298371.1: ubiquitin-conjugating enzyme E2 N isoform X1 [Fopius arisanus]	1.64227e-52
cont2383	XP_012063769.1: uncharacterized protein LOC105627097 [Atta cephalotes]	1.04424e-36
cont2391	XP_011699922.1: F-box only protein 33 [Wasmannia auropunctata]	0.0
cont2392	XP_011861911.1: puratrophin-1-like isoform X1 [Vollenhovia emeryi]	3.14394e-84
cont2393	XP_011168452.1: uncharacterized protein LOC105201882 isoform X1 [Solenopsis invicta]	0.0
cont2394	XP_011697956.1: uncharacterized protein LOC105455944 [Wasmannia auropunctata]	9.74615e-89
cont2396	XP_011162326.1: protein retinal degeneration B isoform X5 [Solenopsis invicta]	0.0
cont2397	XP_011686345.1: uncharacterized protein LOC105449050 [Wasmannia auropunctata]	8.06249e-112
cont2402	XP_011647610.1: exosome component 10 [Pogonomyrmex barbatus]	0.0
cont2404	XP_011068337.1: adenylate cyclase type 6 [Acromyrmex echinatior]	0.0
cont2405	XP_011068337.1: adenylate cyclase type 6 [Acromyrmex echinatior]	0.0
cont2406	XP_011866350.1: cyclin-G-associated kinase [Vollenhovia emeryi]	0.0
cont2408	XP_011065272.1: mesencephalic astrocyte-derived neurotrophic factor homolog [Acromyrmex echinatior]	3.35868e-66
cont2410	XP_012218865.1: histone-lysine N-methyltransferase SETMAR-like [Linepithema humile]	0.000138747
cont2411	XP_011868495.1: arf-GAP with SH3 domain, ANK repeat and PH domain-containing protein 1 isoform X2 [Vollenhovia emeryi]	0.0
cont2412	XP_012059270.1: zinc finger E-box-binding homeobox protein zag-1 [Atta cephalotes]	1.38155e-143
cont2413	XP_011864177.1: zinc finger protein 1 [Vollenhovia emeryi]	0.0
cont2415	XP_011872634.1: serine/arginine repetitive matrix protein 1-like isoform X2 [Vollenhovia emeryi]	9.81636e-166
cont2416	XP_011700663.1: geranylgeranyl pyrophosphate synthase [Wasmannia auropunctata]	8.11347e-15
cont2417	XP_011882269.1: trinucleotide repeat-containing gene 6C protein isoform X1 [Vollenhovia emeryi]	0.0
cont2418	XP_011061430.1: uncharacterized protein LOC105150208 [Acromyrmex echinatior]	0.887827
cont2419	XP_011052838.1: eukaryotic translation initiation factor 6 [Acromyrmex echinatior]	0.848769
cont2420	XP_011875526.1: E3 ubiquitin-protein ligase HECTD1 isoform X1 [Vollenhovia emeryi]	0.0
cont2421	XP_014474131.1: uncharacterized protein K02A2.6-like isoform X2 [Dinoponera quadriceps]	0.0
cont2422	XP_011054005.1: elongation of very long chain fatty acids protein 6 [Acromyrmex echinatior]	0.0
cont2423	XP_011629878.1: dehydrogenase/reductase SDR family member 11-like [Pogonomyrmex barbatus]	2.02045e-59
cont2424	XP_011692974.1: ER degradation-enhancing alpha-mannosidase-like protein 2 [Wasmannia auropunctata]	0.0
cont2425	XP_011175993.1: uncharacterized protein LOC105207981 isoform X3 [Solenopsis invicta]	1.03881e-27
cont2426	XP_012216616.1: intersectin-1 isoform X5 [Linepithema humile]	0.00550631
cont2427	XP_011878070.1: protein kibra [Vollenhovia emeryi]	0.0
cont2429	XP_011635200.1: muscle M-line assembly protein unc-89-like [Pogonomyrmex barbatus]	2.32492e-137
cont2430	XP_011636353.1: FIT family protein CG10671 [Pogonomyrmex barbatus]	3.54826e-170
cont2431	XP_012139742.1: NAD kinase-like isoform X9 [Megachile rotundata]	4.43503e-66
cont2433	XP_011644735.1: uncharacterized protein LOC105431922 [Pogonomyrmex barbatus]	2.69808e-39
cont2434	XP_011699975.1: dosage compensation regulator isoform X2 [Wasmannia auropunctata]	0.0
cont2435	XP_011876928.1: putative elongator complex protein 1 [Vollenhovia emeryi]	2.39074e-38
cont2436	XP_011685788.1: LOW QUALITY PROTEIN: E3 ubiquitin-protein ligase Su(dx) [Wasmannia auropunctata]	0.0
cont2437	XP_011690179.1: protein claret segregational [Wasmannia auropunctata]	3.06727e-153
cont2438	XP_011692346.1: bifunctional glutamate/proline--tRNA ligase [Wasmannia auropunctata]	0.0
cont2439	XP_011882869.1: bifunctional glutamate/proline--tRNA ligase [Vollenhovia emeryi]	1.44432e-79
cont2440	XP_014485239.1: heat shock 70 kDa protein cognate 3 [Dinoponera quadriceps]	9.70351e-100
cont2444	XP_011049194.1: syntaxin-binding protein 5 isoform X4 [Acromyrmex echinatior]	3.13927e-148
cont2445	XP_011860239.1: syntaxin-binding protein 5 isoform X4 [Vollenhovia emeryi]	0.0
cont2446	XP_011049194.1: syntaxin-binding protein 5 isoform X4 [Acromyrmex echinatior]	1.05153e-148
cont2447	XP_011863311.1: diacylglycerol kinase theta isoform X1 [Vollenhovia emeryi]	0.0
cont2448	XP_014489161.1: uncharacterized protein LOC106752158 isoform X3 [Dinoponera quadriceps]	0.0567959
cont2452	XP_011692515.1: putative tRNA pseudouridine synthase Pus10 [Wasmannia auropunctata]	0.0
cont2453	XP_011869371.1: INO80 complex subunit B [Vollenhovia emeryi]	3.53198e-133
cont2454	XP_011638304.1: membrane-bound transcription factor site-2 protease [Pogonomyrmex barbatus]	0.0
cont2455	XP_012542237.1: myotubularin-related protein 2 isoform X2 [Monomorium pharaonis]	0.0
cont2456	XP_012542237.1: myotubularin-related protein 2 isoform X2 [Monomorium pharaonis]	0.0
cont2457	XP_011688257.1: uncharacterized protein LOC105450208 isoform X1 [Wasmannia auropunctata]	2.52103e-113
cont2459	XP_011881133.1: myoneurin-like [Vollenhovia emeryi]	0.0
cont2461	XP_012061832.1: 46 kDa FK506-binding nuclear protein [Atta cephalotes]	1.65891e-14
cont2462	XP_012061832.1: 46 kDa FK506-binding nuclear protein [Atta cephalotes]	3.43911e-23
cont2463	XP_008552527.1: density-regulated protein homolog [Microplitis demolitor]	0.711707
cont2464	XP_012350520.1: 4-hydroxyphenylpyruvate dioxygenase isoform X2 [Apis florea]	8.17114e-39
cont2465	XP_011160311.1: uncharacterized protein LOC105196209 [Solenopsis invicta]	2.59187e-106
cont2466	XP_012543640.1: 28S ribosomal protein S7, mitochondrial-like [Monomorium pharaonis]	3.05378e-135
cont2467	XP_011866771.1: dyslexia susceptibility 1 candidate gene 1 protein homolog [Vollenhovia emeryi]	0.0
cont2477	XP_011637302.1: LOW QUALITY PROTEIN: uncharacterized protein LOC105427334, partial [Pogonomyrmex barbatus]	5.071e-31
cont2478	XP_012061886.1: mediator of RNA polymerase II transcription subunit 25 [Atta cephalotes]	0.0
cont2479	XP_011159243.1: caltractin, partial [Solenopsis invicta]	8.78063e-81
cont2480	XP_011170918.1: cytoglobin-2 [Solenopsis invicta]	4.82503e-20
cont2482	XP_011639023.1: uncharacterized protein LOC105428408 isoform X1 [Pogonomyrmex barbatus]	8.50347e-43
cont2484	XP_012533395.1: transmembrane protein 223-like [Monomorium pharaonis]	3.28999e-113
cont2485	XP_012541811.1: uncharacterized protein LOC105839802 [Monomorium pharaonis]	0.000189136
cont2486	XP_011706153.1: cytochrome P450 77A2-like, partial [Wasmannia auropunctata]	2.01102e-05
cont2490	XP_011704008.1: dual specificity mitogen-activated protein kinase kinase 6 [Wasmannia auropunctata]	6.95575e-147
cont2493	XP_011874430.1: potassium/sodium hyperpolarization-activated cyclic nucleotide-gated channel 1-like [Vollenhovia emeryi]	0.0
cont2494	XP_011165421.1: acetyl-coenzyme A synthetase [Solenopsis invicta]	0.0
cont2495	XP_011870140.1: peroxidasin isoform X2 [Vollenhovia emeryi]	0.0
cont2497	XP_012535705.1: protein N-terminal asparagine amidohydrolase [Monomorium pharaonis]	8.65351e-21
cont2499	XP_011633319.1: LOW QUALITY PROTEIN: formin-J [Pogonomyrmex barbatus]	0.000130662
cont2500	XP_012555510.1: 60S ribosomal protein L21-like [Hydra vulgaris]	2.41042e-50
cont2502	XP_011862715.1: cytochrome P450 6B2-like [Vollenhovia emeryi]	2.48309e-121
cont2504	XP_011632284.1: 4-coumarate--CoA ligase-like 7 [Pogonomyrmex barbatus]	1.54988e-100
cont2505	XP_011859426.1: uncharacterized protein LOC105556922 [Vollenhovia emeryi]	8.38909e-96
cont2507	XP_012064166.1: uncharacterized protein LOC105627497 [Atta cephalotes]	0.0
cont2508	XP_012528576.1: uncharacterized protein LOC105832304 [Monomorium pharaonis]	1.79792e-173
cont2509	XP_011699787.1: uncharacterized protein LOC105457055 [Wasmannia auropunctata]	8.13899e-131
cont2510	XP_011880622.1: uncharacterized protein LOC105569073 isoform X4 [Vollenhovia emeryi]	0.962185
cont2515	XP_011704780.1: ankyrin-2-like isoform X3 [Wasmannia auropunctata]	1.31327e-23
cont2520	XP_011169678.1: uncharacterized protein LOC105202723 isoform X1 [Solenopsis invicta]	1.64933e-57
cont2521	XP_014471178.1: circadian locomoter output cycles protein kaput isoform X1 [Dinoponera quadriceps]	0.0
cont2522	XP_014213069.1: mothers against decapentaplegic homolog 3-like [Copidosoma floridanum]	2.40233e-130
cont2524	XP_011169253.1: E3 ubiquitin-protein ligase CBL isoform X2 [Solenopsis invicta]	0.0
cont2525	XP_011866297.1: uncharacterized protein LOC105561160 [Vollenhovia emeryi]	1.0256e-100
cont2526	XP_011859283.1: uncharacterized protein K02A2.6-like [Vollenhovia emeryi]	0.0
cont2527	XP_012524127.1: ATP-dependent RNA helicase WM6 isoform X1 [Monomorium pharaonis]	0.0
cont2528	XP_011876132.1: probable G-protein coupled receptor CG31760 isoform X1 [Vollenhovia emeryi]	0.0
cont2530	XP_011168252.1: uncharacterized protein CG43867 isoform X1 [Solenopsis invicta]	6.6986e-24
cont2537	XP_011698030.1: cell growth-regulating nucleolar protein [Wasmannia auropunctata]	1.19957e-162
cont2539	XP_011883918.1: fatty acid synthase-like, partial [Vollenhovia emeryi]	3.48523e-08
cont2540	XP_011067801.1: NADH dehydrogenase [ubiquinone] iron-sulfur protein 4, mitochondrial [Acromyrmex echinatior]	5.72743e-26
cont2541	XP_011869019.1: NADH dehydrogenase [ubiquinone] iron-sulfur protein 4, mitochondrial [Vollenhovia emeryi]	1.36311e-120
cont2542	XP_011635406.1: uncharacterized protein LOC105426047 [Pogonomyrmex barbatus]	0.764588
cont2544	XP_011639149.1: UDP-N-acetylglucosamine--dolichyl-phosphate N-acetylglucosaminephosphotransferase [Pogonomyrmex barbatus]	2.95652e-70
cont2545	NP_001164361.1| ATP synthase subunit beta, mitochondrial [Tribolium castaneum]	0.0
cont2546	XP_011860663.1: uncharacterized protein LOC105557885 isoform X6 [Vollenhovia emeryi]	1.10956e-31
cont2547	XP_011862789.1: NGFI-A-binding protein homolog [Vollenhovia emeryi]	2.49588e-120
cont2550	XP_011706399.1: proteasome assembly chaperone 1 [Wasmannia auropunctata]	1.62833e-117
cont2551	XP_011647934.1: uncharacterized protein LOC105434058 isoform X1 [Pogonomyrmex barbatus]	3.65879e-45
cont2554	XP_013190478.1: retrovirus-related Pol polyprotein from transposon TNT 1-94 [Amyelois transitella]	9.90018e-106
cont2556	XP_011692073.1: ubiquitin carboxyl-terminal hydrolase 3-like [Wasmannia auropunctata]	4.3544e-09
cont2558	XP_011858947.1: uncharacterized protein LOC105556465 [Vollenhovia emeryi]	4.42542e-31
cont2560	XP_011688257.1: uncharacterized protein LOC105450208 isoform X1 [Wasmannia auropunctata]	0.0
cont2561	XP_009044267.1| hypothetical protein LOTGIDRAFT_109628 [Lottia gigantea]	0.00201457
cont2565	XP_011053769.1: ribosomal RNA processing protein 36 homolog [Acromyrmex echinatior]	1.32708e-98
cont2566	XP_011059090.1: uncharacterized protein LOC105148838 isoform X4 [Acromyrmex echinatior]	1.37001e-158
cont2567	XP_011874586.1: microtubule-associated protein futsch-like isoform X2 [Vollenhovia emeryi]	1.16346e-20
cont2569	XP_011873060.1: uncharacterized protein LOC105564903 [Vollenhovia emeryi]	0.0
cont2570	XP_011055221.1: protein unc-45 homolog B [Acromyrmex echinatior]	0.0
cont2571	XP_011640612.1: protein unc-45 homolog B isoform X2 [Pogonomyrmex barbatus]	0.0
cont2572	XP_012540226.1: DNA-binding protein D-ETS-3-like isoform X1 [Monomorium pharaonis]	0.0
cont2573	XP_012217188.1: uncharacterized protein LOC105669022, partial [Linepithema humile]	0.000383396
cont2574	XP_012064384.1: LOW QUALITY PROTEIN: protein toll [Atta cephalotes]	0.189147
cont2576	XP_011880517.1: maternal protein exuperantia [Vollenhovia emeryi]	0.0
cont2578	XP_011631281.1: E3 ubiquitin-protein ligase FANCL isoform X1 [Pogonomyrmex barbatus]	5.07756e-163
cont2579	XP_011173681.1: uncharacterized protein LOC105205846 [Solenopsis invicta]	1.77914e-37
cont2582	XP_011860675.1: uncharacterized protein LOC105557895 [Vollenhovia emeryi]	1.52696e-21
cont2583	XP_012532093.1: uncharacterized protein LOC105834283 [Monomorium pharaonis]	9.49313e-40
cont2584	XP_011705608.1: uncharacterized protein LOC105460815 [Wasmannia auropunctata]	1.40089e-13
cont2585	XP_011867767.1: AF4/FMR2 family member 4-like isoform X2 [Vollenhovia emeryi]	1.32608e-151
cont2587	XP_011053958.1: LOW QUALITY PROTEIN: high mobility group protein DSP1-like [Acromyrmex echinatior]	5.09072e-39
cont2588	XP_011161422.1: TBC1 domain family member 15-like [Solenopsis invicta]	0.0
cont2590	XP_011696427.1: neural Wiskott-Aldrich syndrome protein [Wasmannia auropunctata]	0.0
cont2592	XP_011169715.1: G protein-coupled receptor kinase 1-like [Solenopsis invicta]	2.92969e-10
cont2600	XP_012214839.1: putative golgin subfamily A member 6-like protein 6 [Linepithema humile]	1.28455e-34
cont2602	XP_011164073.1: sorbin and SH3 domain-containing protein 1-like [Solenopsis invicta]	1.12193e-137
cont2606	XP_011168110.1: putative nuclease HARBI1 [Solenopsis invicta]	1.47651e-152
cont2612	XP_011882658.1: uncharacterized protein LOC105570224 [Vollenhovia emeryi]	1.49053e-57
cont2613	XP_011869497.1: cAMP-dependent protein kinase type I regulatory subunit isoform X3 [Vollenhovia emeryi]	1.36588e-13
cont2616	XP_011156175.1: discoidin domain-containing receptor 2-like [Solenopsis invicta]	0.0
cont2622	XP_008189131.1: probable rhizopine catabolism regulatory protein MocR, partial [Acyrthosiphon pisum]	1.73149e-25
cont2628	XP_011858857.1: uncharacterized protein LOC105556380 [Vollenhovia emeryi]	8.49056e-95
cont2629	XP_011866087.1: uncharacterized protein LOC105561048 [Vollenhovia emeryi]	2.3672e-61
cont2630	XP_011163602.1: menin [Solenopsis invicta]	0.0
cont2631	XP_011646373.1: frizzled-7-B [Pogonomyrmex barbatus]	0.0
cont2632	XP_012059257.1: protein ROP [Atta cephalotes]	0.0
cont2634	XP_011703400.1: odorant receptor 85c-like [Wasmannia auropunctata]	1.5873e-20
cont2635	XP_011860839.1: UPF0378 protein KIAA0100 isoform X2 [Vollenhovia emeryi]	0.0
cont2636	XP_011860837.1: UPF0378 protein KIAA0100 isoform X1 [Vollenhovia emeryi]	0.0
cont2639	XP_011170774.1: glucose dehydrogenase [FAD, quinone]-like [Solenopsis invicta]	0.0
cont2640	XP_014474583.1: uncharacterized protein LOC106744384 isoform X1 [Dinoponera quadriceps]	4.76299e-14
cont2642	XP_011055868.1: mannose-1-phosphate guanyltransferase alpha [Acromyrmex echinatior]	0.0
cont2644	XP_011635769.1: GATA zinc finger domain-containing protein 10-like [Pogonomyrmex barbatus]	3.81881e-152
cont2645	XP_012058062.1: uncharacterized protein LOC105621200 [Atta cephalotes]	0.0
cont2646	XP_012136489.1: transketolase isoform X1 [Megachile rotundata]	1.44223e-07
cont2647	XP_012062448.1: transmembrane protease serine 9-like [Atta cephalotes]	1.50846e-32
cont2648	XP_012062448.1: transmembrane protease serine 9-like [Atta cephalotes]	3.44494e-57
cont2649	XP_011304907.1: zinc finger protein 880-like isoform X6 [Fopius arisanus]	0.00385933
cont2650	XP_011685317.1: rhophilin-2 isoform X2 [Wasmannia auropunctata]	0.0
cont2651	XP_012235691.1: uncharacterized protein LOC105679930 [Linepithema humile]	7.10374e-47
cont2652	XP_011862062.1: U1 small nuclear ribonucleoprotein 70 kDa [Vollenhovia emeryi]	3.58352e-74
cont2653	XP_011165716.1: uncharacterized protein LOC105200045 [Solenopsis invicta]	2.99144e-97
cont2654	XP_012537111.1: ankyrin repeat domain-containing protein 49-like [Monomorium pharaonis]	3.43148e-101
cont2655	XP_015435917.1: RNA binding protein fox-1 homolog 2 isoform X2 [Dufourea novaeangliae]	6.6992e-44
cont2656	XP_015520816.1: RNA binding protein fox-1 homolog 2 [Neodiprion lecontei]	0.000471197
cont2660	XP_011298410.1: uncharacterized protein LOC105263718 [Fopius arisanus]	1.13385e-56
cont2661	XP_011298410.1: uncharacterized protein LOC105263718 [Fopius arisanus]	1.1589e-17
cont2662	XP_012054582.1: LOW QUALITY PROTEIN: alpha-tocopherol transfer protein-like [Atta cephalotes]	2.32965e-117
cont2663	XP_011692002.1: probable aspartate aminotransferase, cytoplasmic isoform X1 [Wasmannia auropunctata]	0.0
cont2664	XP_012533214.1: uncharacterized protein LOC105834908 isoform X2 [Monomorium pharaonis]	2.35313e-19
cont2665	XP_011631493.1: signal peptide peptidase-like 3 [Pogonomyrmex barbatus]	0.0
cont2666	XP_012060231.1: uncharacterized protein LOC105623449 [Atta cephalotes]	1.91321e-22
cont2667	XP_011861391.1: uncharacterized protein LOC105558380 isoform X1 [Vollenhovia emeryi]	1.3535e-72
cont2669	XP_011705799.1: uncharacterized protein LOC105460998, partial [Wasmannia auropunctata]	1.10486e-69
cont2673	XP_011699351.1: lipoamide acyltransferase component of branched-chain alpha-keto acid dehydrogenase complex, mitochondrial [Wasmannia auropunctata]	1.10841e-149
cont2674	XP_011696244.1: uncharacterized protein LOC105454951 [Wasmannia auropunctata]	0.0
cont2675	XP_011167786.1: protocadherin-15 [Solenopsis invicta]	0.0
cont2676	XP_011865092.1: uncharacterized protein LOC105560525 [Vollenhovia emeryi]	3.57341e-139
cont2677	XP_011168255.1: uncharacterized protein CG43867 isoform X4 [Solenopsis invicta]	0.0
cont2679	XP_011056287.1: receptor-binding cancer antigen expressed on SiSo cells [Acromyrmex echinatior]	4.79882e-30
cont2680	XP_011707591.1: fatty acid synthase-like [Wasmannia auropunctata]	6.97756e-26
cont2681	XP_012061515.1: uncharacterized protein LOC105624773 [Atta cephalotes]	0.0
cont2683	XP_011164344.1: elongation factor Tu GTP-binding domain-containing protein 1 [Solenopsis invicta]	0.0
cont2684	XP_011702515.1: Krueppel-like factor 13 [Wasmannia auropunctata]	3.93452e-138
cont2685	XP_011880621.1: uncharacterized protein LOC105569073 isoform X3 [Vollenhovia emeryi]	9.59068e-111
cont2686	XP_011880619.1: uncharacterized protein LOC105569073 isoform X2 [Vollenhovia emeryi]	7.13987e-144
cont2687	XP_012540267.1: cytochrome P450 6k1-like, partial [Monomorium pharaonis]	4.67922e-30
cont2688	XP_011866376.1: cytochrome P450 6k1-like [Vollenhovia emeryi]	0.0
cont2689	XP_011872716.1: uncharacterized protein LOC105564716 [Vollenhovia emeryi]	3.60712e-113
cont2690	XP_011872716.1: uncharacterized protein LOC105564716 [Vollenhovia emeryi]	5.25671e-167
cont2691	XP_012523963.1: uncharacterized protein LOC105829548 [Monomorium pharaonis]	1.82631e-16
cont2692	XP_011641708.1: m7GpppN-mRNA hydrolase isoform X1 [Pogonomyrmex barbatus]	0.0
cont2694	XP_014474232.1: heterogeneous nuclear ribonucleoprotein 27C-like isoform X5 [Dinoponera quadriceps]	1.48942e-132
cont2697	XP_011868414.1: uncharacterized protein LOC105562289 [Vollenhovia emeryi]	7.43622e-67
cont2699	XP_012064367.1: uncharacterized protein LOC105627700 [Atta cephalotes]	6.42625e-18
cont2700	XP_014602168.1: leucine-rich repeats and immunoglobulin-like domains protein 1 [Polistes canadensis]	0.0434144
cont2702	XP_011868675.1: uncharacterized protein LOC105562439 isoform X1 [Vollenhovia emeryi]	0.0
cont2705	XP_011699228.1: uncharacterized protein LOC105456695 [Wasmannia auropunctata]	5.49091e-37
cont2706	XP_011879412.1: probable serine/threonine-protein kinase yakA isoform X2 [Vollenhovia emeryi]	1.96999e-60
cont2710	XP_011687072.1: RNA-directed DNA polymerase from mobile element jockey-like [Wasmannia auropunctata]	8.76968e-17
cont2713	XP_012249086.1: CDK5RAP1-like protein [Bombus impatiens]	1.26756e-20
cont2715	XP_011872815.1: uncharacterized protein LOC105564777 [Vollenhovia emeryi]	2.39841e-44
cont2718	XP_012228171.1: uncharacterized protein LOC105675530 [Linepithema humile]	4.25481e-21
cont2720	XP_011054820.1: leucine-rich repeat-containing protein 15-like [Acromyrmex echinatior]	6.46634e-48
cont2721	XP_011858947.1: uncharacterized protein LOC105556465 [Vollenhovia emeryi]	0.000278935
cont2722	XP_011684526.1: CREB-binding protein isoform X1 [Wasmannia auropunctata]	7.27477e-38
cont2727	XP_011155626.1: calreticulin [Solenopsis invicta]	0.000122492
cont2728	XP_011172677.1: uncharacterized protein LOC105205080, partial [Solenopsis invicta]	1.68557e-53
cont2732	XP_002162844.1: 60S ribosomal protein L15-like [Hydra vulgaris]	2.0055e-48
cont2733	XP_012235472.1: syndecan isoform X1 [Linepithema humile]	0.000291527
cont2734	XP_011881768.1: uncharacterized protein LOC105569705 isoform X2 [Vollenhovia emeryi]	9.75801e-163
cont2735	XP_011859690.1: uncharacterized protein LOC105557132 [Vollenhovia emeryi]	9.0387e-30
cont2736	XP_012539109.1: cuticle protein 21-like [Monomorium pharaonis]	4.41462e-36
cont2737	XP_015120930.1: caspase-1-like [Diachasma alloeum]	2.15049e-38
cont2738	XP_011156658.1: uncharacterized protein LOC105193778 [Solenopsis invicta]	1.38976e-97
cont2741	XP_012215147.1: hrp65 protein-like isoform X2 [Linepithema humile]	0.000263785
cont2744	XP_012540279.1: chymotrypsin-like protease CTRL-1 [Monomorium pharaonis]	2.03099e-158
cont2745	XP_011155377.1: cytochrome b-c1 complex subunit 7-like [Solenopsis invicta]	1.2923e-26
cont2748	XP_011162190.1: RNA-binding protein squid-like isoform X12 [Solenopsis invicta]	4.84196e-07
cont2750	XP_011636983.1: DDB1- and CUL4-associated factor 8 [Pogonomyrmex barbatus]	0.0
cont2753	XP_012531667.1: zinc finger protein 62-like [Monomorium pharaonis]	4.32546e-61
cont2756	XP_011879013.1: dynactin subunit 4 isoform X1 [Vollenhovia emeryi]	0.0
cont2759	XP_011869825.1: targeting protein for Xklp2 [Vollenhovia emeryi]	0.0
cont2766	XP_011705916.1: uncharacterized protein LOC105461126 [Wasmannia auropunctata]	3.28651e-104
cont2769	XP_014474811.1: LOW QUALITY PROTEIN: glutamyl aminopeptidase-like [Dinoponera quadriceps]	1.98211e-10
cont2772	XP_011862120.1: uncharacterized protein LOC105558811 [Vollenhovia emeryi]	7.02934e-55
cont2774	XP_011171560.1: uncharacterized protein LOC105204206, partial [Solenopsis invicta]	2.04216e-63
cont2775	XP_011169962.1: uncharacterized protein LOC105202964 [Solenopsis invicta]	1.8226e-38
cont2776	XP_001656430.1| AAEL000424-PA [Aedes aegypti]	2.71742e-12
cont2780	XP_011061264.1: TWiK family of potassium channels protein 7-like [Acromyrmex echinatior]	0.0
cont2781	XP_011689959.1: uncharacterized protein LOC105451287 [Wasmannia auropunctata]	0.0
cont2784	XP_011864472.1: uncharacterized protein LOC105560198 [Vollenhovia emeryi]	3.56738e-14
cont2792	XP_012547423.1: uncharacterized protein LOC105841932 [Bombyx mori]	4.03153e-85
cont2796	XP_011877764.1: class E basic helix-loop-helix protein 23 [Vollenhovia emeryi]	2.94607e-27
cont2800	XP_011869562.1: heterogeneous nuclear ribonucleoprotein U-like isoform X1 [Vollenhovia emeryi]	0.0
cont2801	XP_011878283.1: zinc transporter ZIP11 isoform X2 [Vollenhovia emeryi]	2.00207e-95
cont2803	XP_011162077.1: septin-1 [Solenopsis invicta]	0.0
cont2804	XP_011882571.1: poly(U)-specific endoribonuclease homolog [Vollenhovia emeryi]	7.74967e-48
cont2805	XP_011882571.1: poly(U)-specific endoribonuclease homolog [Vollenhovia emeryi]	1.57125e-24
cont2806	XP_011878477.1: uncharacterized protein LOC105567861 isoform X2 [Vollenhovia emeryi]	0.0
cont2809	XP_011869918.1: regulator of G-protein signaling 7 isoform X1 [Vollenhovia emeryi]	0.0
cont2810	XP_011870312.1: coiled-coil domain-containing protein 108 isoform X3 [Vollenhovia emeryi]	0.0
cont2812	XP_012533487.1: uncharacterized protein LOC105835070 [Monomorium pharaonis]	0.0
cont2813	XP_011639892.1: protein D2-like isoform X1 [Pogonomyrmex barbatus]	8.3994e-102
cont2815	XP_011862248.1: ribosome biogenesis regulatory protein homolog [Vollenhovia emeryi]	9.64484e-87
cont2816	XP_011695646.1: protein FAM188A homolog [Wasmannia auropunctata]	0.0
cont2817	XP_011695646.1: protein FAM188A homolog [Wasmannia auropunctata]	0.0
cont2818	XP_011156085.1: mitochondrial basic amino acids transporter-like isoform X2 [Solenopsis invicta]	4.4047e-28
cont2819	XP_011860640.1: uncharacterized protein LOC105557870 isoform X2 [Vollenhovia emeryi]	0.0
cont2820	XP_011860640.1: uncharacterized protein LOC105557870 isoform X2 [Vollenhovia emeryi]	0.0
cont2821	XP_011636073.1: probable cytochrome P450 6a13 [Pogonomyrmex barbatus]	6.60695e-37
cont2822	XP_011173681.1: uncharacterized protein LOC105205846 [Solenopsis invicta]	4.43273e-20
cont2823	XP_012533858.1: cytochrome P450 6A1-like, partial [Monomorium pharaonis]	8.32381e-41
cont2824	XP_011173681.1: uncharacterized protein LOC105205846 [Solenopsis invicta]	0.0270925
cont2825	XP_011173681.1: uncharacterized protein LOC105205846 [Solenopsis invicta]	0.00184782
cont2826	XP_011875741.1: uncharacterized protein LOC105566396 isoform X2 [Vollenhovia emeryi]	0.0
cont2829	XP_011865370.1: 1-phosphatidylinositol 4,5-bisphosphate phosphodiesterase gamma-1 isoform X3 [Vollenhovia emeryi]	0.0
cont2830	XP_011865370.1: 1-phosphatidylinositol 4,5-bisphosphate phosphodiesterase gamma-1 isoform X3 [Vollenhovia emeryi]	0.0
cont2831	XP_011865370.1: 1-phosphatidylinositol 4,5-bisphosphate phosphodiesterase gamma-1 isoform X3 [Vollenhovia emeryi]	0.0
cont2832	XP_011865370.1: 1-phosphatidylinositol 4,5-bisphosphate phosphodiesterase gamma-1 isoform X3 [Vollenhovia emeryi]	0.0
cont2833	XP_011685166.1: autophagy-related protein 16-1 isoform X1 [Wasmannia auropunctata]	0.0
cont2834	XP_011872815.1: uncharacterized protein LOC105564777 [Vollenhovia emeryi]	4.46914e-43
cont2835	XP_011159521.1: transmembrane protein 135-like [Solenopsis invicta]	0.0
cont2836	XP_011159521.1: transmembrane protein 135-like [Solenopsis invicta]	0.0
cont2837	XP_012528852.1: transmembrane protein 135-like isoform X1 [Monomorium pharaonis]	6.9492e-120
cont2838	XP_012535813.1: neurotrimin-like [Monomorium pharaonis]	7.59635e-151
cont2839	XP_012535813.1: neurotrimin-like [Monomorium pharaonis]	0.0
cont2840	XP_011062358.1: F-actin-capping protein subunit alpha [Acromyrmex echinatior]	4.78121e-14
cont2841	XP_011880238.1: zinc finger BED domain-containing protein 1-like [Vollenhovia emeryi]	0.0
cont2844	XP_011704599.1: cancer-related nucleoside-triphosphatase homolog isoform X1 [Wasmannia auropunctata]	1.67787e-69
cont2845	XP_011062152.1: serine/threonine-protein phosphatase 5 [Acromyrmex echinatior]	3.46439e-152
cont2846	XP_011062268.1: dedicator of cytokinesis protein 7 [Acromyrmex echinatior]	0.0
cont2847	XP_011059106.1: uncharacterized protein LOC105148841 isoform X1 [Acromyrmex echinatior]	0.0
cont2848	XP_011706366.1: uncharacterized protein LOC105461562 [Wasmannia auropunctata]	3.04153e-11
cont2850	XP_012529374.1: glucose-6-phosphate isomerase [Monomorium pharaonis]	0.0
cont2851	XP_011696577.1: glucose-6-phosphate isomerase [Wasmannia auropunctata]	0.0
cont2852	XP_011874531.1: apoptosis-resistant E3 ubiquitin protein ligase 1 isoform X1 [Vollenhovia emeryi]	6.30724e-29
cont2854	XP_011873842.1: transcription factor SPT20 homolog isoform X1 [Vollenhovia emeryi]	1.36846e-59
cont2855	XP_011707648.1: translocation protein SEC63 homolog [Wasmannia auropunctata]	0.0
cont2857	XP_012059941.1: translocation protein SEC63 homolog [Atta cephalotes]	0.0
cont2860	XP_011863294.1: transmembrane protein 35 isoform X1 [Vollenhovia emeryi]	6.03888e-70
cont2861	XP_012063996.1: uncharacterized protein LOC105627321 [Atta cephalotes]	2.77165e-12
cont2862	XP_012063996.1: uncharacterized protein LOC105627321 [Atta cephalotes]	6.70458e-48
cont2864	XP_011175751.1: V-type proton ATPase subunit D-like [Solenopsis invicta]	1.91495e-51
cont2867	XP_012529462.1: calcium/calmodulin-dependent 3',5'-cyclic nucleotide phosphodiesterase 1A-like isoform X6 [Monomorium pharaonis]	7.12726e-43
cont2871	XP_012541827.1: insulin-degrading enzyme isoform X1 [Monomorium pharaonis]	1.20588e-102
cont2875	XP_011065188.1: LOW QUALITY PROTEIN: calcium and integrin-binding protein 1-like [Acromyrmex echinatior]	6.73237e-18
cont2876	XP_011706628.1: uncharacterized protein LOC105461821 [Wasmannia auropunctata]	8.62904e-53
cont2877	XP_006823516.1: monoglyceride lipase-like [Saccoglossus kowalevskii]	1.3497e-05
cont2878	XP_011053674.1: F-box/LRR-repeat protein 20 isoform X2 [Acromyrmex echinatior]	1.60663e-20
cont2879	XP_011881907.1: cytosolic carboxypeptidase 2-like [Vollenhovia emeryi]	2.36799e-47
cont2882	XP_012064226.1: uncharacterized protein LOC105627551 [Atta cephalotes]	5.99385e-05
cont2883	XP_011705654.1: uncharacterized protein LOC105460864, partial [Wasmannia auropunctata]	8.92793e-29
cont2884	XP_015519010.1: uncharacterized protein LOC107223734 [Neodiprion lecontei]	0.0796213
cont2886	XP_011707937.1: uncharacterized protein K02A2.6-like [Wasmannia auropunctata]	4.92008e-12
cont2887	XP_011162349.1: leucine-rich repeats and immunoglobulin-like domains protein 3 isoform X2 [Solenopsis invicta]	5.10718e-167
cont2889	XP_011162390.1: uncharacterized protein LOC105197623, partial [Solenopsis invicta]	4.22565e-41
cont2890	XP_012341383.1: 50S ribosomal protein L6, chloroplastic-like [Apis florea]	2.78998e-48
cont2895	XP_014472394.1: kinesin-like protein KIF19 isoform X2 [Dinoponera quadriceps]	0.0
cont2897	XP_012218777.1: LIRP isoform X3 [Linepithema humile]	0.168589
cont2898	XP_012233621.1: ATPase family AAA domain-containing protein 3 [Linepithema humile]	4.81409e-10
cont2901	XP_011863930.1: axoneme-associated protein mst101(2)-like isoform X1 [Vollenhovia emeryi]	4.56325e-133
cont2902	XP_012058272.1: kelch repeat and BTB domain-containing protein 12-like [Atta cephalotes]	2.87684e-141
cont2903	XP_012058272.1: kelch repeat and BTB domain-containing protein 12-like [Atta cephalotes]	1.69768e-18
cont2910	XP_011642924.1: C3 and PZP-like alpha-2-macroglobulin domain-containing protein 8 [Pogonomyrmex barbatus]	0.0
cont2915	XP_012349717.1: probable replicative DNA helicase, partial [Apis florea]	9.39755e-45
cont2921	XP_017118186.1: scyllo-inositol 2-dehydrogenase (NAD(+))-like [Drosophila elegans]	4.9914e-17
cont2922	XP_014261173.1: L-cystine transport system permease protein YecS-like [Cimex lectularius]	3.94781e-40
cont2923	XP_011050906.1: putative epidermal cell surface receptor isoform X3 [Acromyrmex echinatior]	2.01072e-38
cont2926	XP_011699436.1: LOW QUALITY PROTEIN: glycerol-3-phosphate dehydrogenase [NAD(+)], cytoplasmic-like [Wasmannia auropunctata]	6.77781e-05
cont2927	XP_016663463.1: uncharacterized protein LOC107884898 [Acyrthosiphon pisum]	4.21332e-38
cont2930	XP_011875301.1: ectopic P granules protein 5 homolog, partial [Vollenhovia emeryi]	0.0
cont2931	XP_012537386.1: D-2-hydroxyglutarate dehydrogenase, mitochondrial [Monomorium pharaonis]	0.0
cont2932	XP_011869679.1: cartilage oligomeric matrix protein isoform X3 [Vollenhovia emeryi]	9.57331e-161
cont2935	XP_011687786.1: uncharacterized protein LOC105449983 [Wasmannia auropunctata]	8.75856e-80
cont2936	XP_011858232.1: uncharacterized protein LOC105555801 [Vollenhovia emeryi]	1.16903e-71
cont2941	XP_011883301.1: ubiquitin-like modifier-activating enzyme 1 isoform X1 [Vollenhovia emeryi]	0.0
cont2942	XP_012223637.1: 60S ribosomal protein L37 isoform X1 [Linepithema humile]	2.10659e-40
cont2943	XP_011644971.1: E3 SUMO-protein ligase EGR2, partial [Pogonomyrmex barbatus]	8.17877e-143
cont2944	XP_011059289.1: probable methylmalonate-semialdehyde dehydrogenase [acylating], mitochondrial isoform X2 [Acromyrmex echinatior]	7.99733e-142
cont2945	XP_011879646.1: fizzy-related protein homolog [Vollenhovia emeryi]	1.3594e-72
cont2946	XP_014234672.1: uncharacterized protein LOC106657589 [Trichogramma pretiosum]	3.70719e-67
cont2947	XP_011866042.1: mucin-16 isoform X1 [Vollenhovia emeryi]	0.0
cont2950	XP_011705201.1: luc7-like protein 3 isoform X3 [Wasmannia auropunctata]	2.52515e-44
cont2951	XP_012063412.1: proline-rich nuclear receptor coactivator 2 B [Atta cephalotes]	4.3301e-21
cont2952	XP_011692840.1: dystrobrevin beta-like isoform X4 [Wasmannia auropunctata]	0.0
cont2953	XP_011882297.1: longitudinals lacking protein, isoform G-like [Vollenhovia emeryi]	8.04026e-62
cont2954	XP_012539414.1: nitric oxide synthase-interacting protein homolog [Monomorium pharaonis]	1.59824e-132
cont2955	XP_015431500.1: probable G-protein coupled receptor Mth-like 1 [Dufourea novaeangliae]	0.0159507
cont2956	XP_011703744.1: transient receptor potential cation channel trpm isoform X4 [Wasmannia auropunctata]	0.0
cont2957	XP_011703741.1: transient receptor potential cation channel trpm isoform X1 [Wasmannia auropunctata]	0.0
cont2960	XP_011868854.1: trafficking kinesin-binding protein milt isoform X4 [Vollenhovia emeryi]	0.0
cont2961	XP_011868854.1: trafficking kinesin-binding protein milt isoform X4 [Vollenhovia emeryi]	4.00353e-30
cont2962	XP_011696013.1: trafficking kinesin-binding protein milt isoform X2 [Wasmannia auropunctata]	0.0
cont2963	XP_011685036.1: uncharacterized protein LOC105448249 [Wasmannia auropunctata]	1.82922e-169
cont2964	XP_011696771.1: G-protein coupled receptor Mth2-like [Wasmannia auropunctata]	1.72981e-47
cont2967	XP_011872301.1: lysosomal acid phosphatase [Vollenhovia emeryi]	0.0
cont2968	XP_011872301.1: lysosomal acid phosphatase [Vollenhovia emeryi]	0.0
cont2969	XP_012534895.1: protein lap4 isoform X5 [Monomorium pharaonis]	0.0
cont2970	XP_011864878.1: protein lap4 isoform X1 [Vollenhovia emeryi]	0.0
cont2971	XP_011058197.1: LOW QUALITY PROTEIN: uncharacterized protein C20orf26-like [Acromyrmex echinatior]	4.55516e-54
cont2973	XP_012531633.1: glypican-6 [Monomorium pharaonis]	1.61004e-85
cont2974	XP_011055112.1: RNA-binding protein 25-like isoform X3 [Acromyrmex echinatior]	3.42803e-11
cont2975	XP_011867219.1: uncharacterized protein LOC105561657 isoform X4 [Vollenhovia emeryi]	0.0
cont2976	XP_011701050.1: uncharacterized protein LOC105457844 isoform X1 [Wasmannia auropunctata]	0.00176637
cont2977	XP_015186792.1: MOB kinase activator-like 2 isoform X4 [Polistes dominula]	4.50412e-16
cont2978	XP_015186790.1: MOB kinase activator-like 2 isoform X3 [Polistes dominula]	7.20612e-48
cont2979	XP_011869281.1: MOB kinase activator-like 2 isoform X1 [Vollenhovia emeryi]	0.0
cont2980	XP_011171904.1: uncharacterized protein LOC105204513 isoform X1 [Solenopsis invicta]	3.61088e-34
cont2981	XP_011165016.1: serpin B3-like isoform X3 [Solenopsis invicta]	9.60195e-78
cont2982	XP_011165016.1: serpin B3-like isoform X3 [Solenopsis invicta]	9.68595e-106
cont2984	XP_011647483.1: carboxypeptidase D-like [Pogonomyrmex barbatus]	0.0
cont2985	XP_011867333.1: proclotting enzyme-like [Vollenhovia emeryi]	1.00348e-100
cont2988	XP_011172516.1: retrovirus-related Pol polyprotein from transposon TNT 1-94, partial [Solenopsis invicta]	0.0
cont2989	XP_011878536.1: E3 ubiquitin-protein ligase LRSAM1-like isoform X1 [Vollenhovia emeryi]	0.0
cont2990	XP_011860567.1: UDP-glucuronosyltransferase 2B19-like isoform X2 [Vollenhovia emeryi]	3.76088e-163
cont2994	XP_011162510.1: uncharacterized protein LOC105197712 [Solenopsis invicta]	0.0
cont2995	XP_011863119.1: calcium/calmodulin-dependent protein kinase kinase 1 isoform X1 [Vollenhovia emeryi]	0.0
cont2996	XP_011869796.1: importin-13 [Vollenhovia emeryi]	0.0
cont2997	XP_014211941.1: uncharacterized protein LOC106641878 [Copidosoma floridanum]	1.51073e-35
cont3000	XP_003494311.1: rRNA biogenesis protein RRP5-like [Bombus impatiens]	8.2584e-66
cont3001	XP_013140275.1: ATP synthase subunit beta, mitochondrial, partial [Papilio polytes]	2.77096e-91
cont3005	XP_012540195.1: protoheme IX farnesyltransferase, mitochondrial-like isoform X1 [Monomorium pharaonis]	1.26199e-84
cont3010	XP_012215900.1: LOW QUALITY PROTEIN: uncharacterized protein LOC105668234 [Linepithema humile]	1.77215e-91
cont3018	XP_011640900.1: uncharacterized protein LOC105429548, partial [Pogonomyrmex barbatus]	0.0
cont3019	XP_016767057.1: calcium/calmodulin-dependent protein kinase II isoform X33 [Apis mellifera]	2.55536e-43
cont3020	XP_011692046.1: probable tubulin polyglutamylase TTLL9 [Wasmannia auropunctata]	1.0588e-143
cont3021	XP_011864921.1: probable tubulin polyglutamylase TTLL9 [Vollenhovia emeryi]	5.96394e-80
cont3022	XP_011883979.1: uncharacterized protein LOC105571116 [Vollenhovia emeryi]	9.11542e-103
cont3023	XP_011639510.1: derlin-1 [Pogonomyrmex barbatus]	2.36403e-86
cont3024	XP_011639510.1: derlin-1 [Pogonomyrmex barbatus]	3.9849e-85
cont3025	XP_011068619.1: lysosomal alpha-mannosidase isoform X1 [Acromyrmex echinatior]	9.03134e-32
cont3026	XP_011049933.1: uncharacterized protein LOC105143347 isoform X1 [Acromyrmex echinatior]	0.0
cont3027	XP_011860961.1: calcium/calmodulin-dependent protein kinase type 1 isoform X1 [Vollenhovia emeryi]	4.44066e-169
cont3028	XP_011634143.1: NADH dehydrogenase (ubiquinone) complex I, assembly factor 6 isoform X4 [Pogonomyrmex barbatus]	2.07622e-125
cont3029	XP_011688146.1: mediator of DNA damage checkpoint protein 1-like [Wasmannia auropunctata]	5.59246e-33
cont3035	XP_011060660.1: zinc finger FYVE domain-containing protein 1-like [Acromyrmex echinatior]	0.0
cont3037	XP_012543276.1: LIM domain kinase 1 isoform X1 [Monomorium pharaonis]	0.0
cont3038	XP_011056793.1: smad nuclear-interacting protein 1 [Acromyrmex echinatior]	1.24865e-134
cont3039	XP_012528666.1: forkhead box protein O-like, partial [Monomorium pharaonis]	2.5605e-164
cont3040	XP_012063855.1: DNA polymerase alpha catalytic subunit [Atta cephalotes]	4.94249e-16
cont3041	XP_011708044.1: DNA polymerase alpha catalytic subunit [Wasmannia auropunctata]	1.01191e-36
cont3042	XP_011708358.1: succinyl-CoA ligase [ADP/GDP-forming] subunit alpha, mitochondrial [Wasmannia auropunctata]	8.5423e-90
cont3043	XP_011056803.1: iron-sulfur cluster co-chaperone protein HscB, mitochondrial [Acromyrmex echinatior]	3.66541e-91
cont3044	XP_011687511.1: ubiquitin-like modifier-activating enzyme 5 [Wasmannia auropunctata]	1.94352e-106
cont3046	XP_011707601.1: uncharacterized protein LOC105462596 [Wasmannia auropunctata]	2.6456e-112
cont3047	XP_011705850.1: ribonuclease P protein subunit p40-like isoform X1 [Wasmannia auropunctata]	0.0
cont3048	XP_012214855.1: dual 3',5'-cyclic-AMP and -GMP phosphodiesterase 11-like isoform X1 [Linepithema humile]	0.000113176
cont3049	XP_011167141.1: transcription factor SOX-8 [Solenopsis invicta]	0.0
cont3050	XP_012057381.1: pre-mRNA-splicing factor SPF27 [Atta cephalotes]	2.47021e-83
cont3051	XP_012057381.1: pre-mRNA-splicing factor SPF27 [Atta cephalotes]	2.44096e-105
cont3054	XP_011875544.1: matrix metalloproteinase-14 isoform X1 [Vollenhovia emeryi]	0.0
cont3055	XP_011859227.1: uncharacterized protein LOC105556736 [Vollenhovia emeryi]	1.95481e-164
cont3058	XP_011063080.1: uncharacterized protein LOC105151212 isoform X1 [Acromyrmex echinatior]	1.84519e-09
cont3059	XP_011630140.1: AF4/FMR2 family member 4 isoform X3 [Pogonomyrmex barbatus]	3.58218e-11
cont3060	XP_011630139.1: AF4/FMR2 family member 4 isoform X2 [Pogonomyrmex barbatus]	1.14676e-09
cont3063	XP_011869361.1: integrin alpha-PS1 isoform X2 [Vollenhovia emeryi]	9.2704e-16
cont3069	XP_011161700.1: protein KBP homolog isoform X2 [Solenopsis invicta]	9.0676e-60
cont3071	XP_012217769.1: uncharacterized SDCCAG3 family protein-like [Linepithema humile]	1.25387e-68
cont3075	XP_011867159.1: N-acetylgalactosaminyltransferase 6-like [Vollenhovia emeryi]	1.20697e-49
cont3078	XP_011057551.1: F-box only protein 33-like [Acromyrmex echinatior]	5.24851e-19
cont3083	XP_011686949.1: uncharacterized protein LOC105449423 [Wasmannia auropunctata]	0.0
cont3084	XP_011881559.1: protein Peter pan [Vollenhovia emeryi]	0.0
cont3085	XP_011871771.1: Hermansky-Pudlak syndrome 1 protein homolog isoform X2 [Vollenhovia emeryi]	0.0
cont3087	XP_011879779.1: neuronal acetylcholine receptor subunit beta-3-like [Vollenhovia emeryi]	3.21365e-156
cont3088	XP_011881428.1: uncharacterized protein LOC105569519 isoform X2 [Vollenhovia emeryi]	2.84915e-107
cont3089	XP_011645752.1: cytochrome c oxidase subunit 6C [Pogonomyrmex barbatus]	4.22871e-18
cont3090	XP_011645752.1: cytochrome c oxidase subunit 6C [Pogonomyrmex barbatus]	7.1111e-34
cont3091	XP_011859431.1: RNA exonuclease 1-like [Vollenhovia emeryi]	0.0
cont3093	XP_011695120.1: DTW domain-containing protein 2 [Wasmannia auropunctata]	4.2147e-171
cont3094	XP_011704227.1: uncharacterized protein LOC105459693 [Wasmannia auropunctata]	1.90464e-54
cont3096	XP_011862180.1: uncharacterized protein LOC105558870 [Vollenhovia emeryi]	0.000293825
cont3099	XP_011875194.1: ubiquitin carboxyl-terminal hydrolase 48-like isoform X2 [Vollenhovia emeryi]	0.0
cont3103	XP_015776316.1: monoglyceride lipase-like isoform X2 [Acropora digitifera]	6.89195e-05
cont3106	XP_011065003.1: lachesin-like [Acromyrmex echinatior]	8.04382e-147
cont3107	XP_011175738.1: anionic trypsin-2-like [Solenopsis invicta]	6.18842e-60
cont3111	XP_011642492.1: uncharacterized protein LOC105430571 [Pogonomyrmex barbatus]	5.84777e-22
cont3112	XP_011642168.1: LOW QUALITY PROTEIN: IQ and AAA domain-containing protein 1-like [Pogonomyrmex barbatus]	1.46137e-98
cont3113	XP_011059240.1: kinetochore-associated protein 1 [Acromyrmex echinatior]	0.0
cont3114	XP_012219350.1: zinc finger MYM-type protein 6 isoform X2 [Linepithema humile]	1.18275e-43
cont3115	XP_017118284.1: DNA polymerase III subunit epsilon-like [Drosophila elegans]	3.90062e-05
cont3116	XP_015916412.1: uncharacterized protein LOC107446313 [Parasteatoda tepidariorum]	1.0776e-32
cont3122	XP_011168110.1: putative nuclease HARBI1 [Solenopsis invicta]	0.0
cont3125	XP_011693878.1: diphthine--ammonia ligase isoform X1 [Wasmannia auropunctata]	0.0
cont3126	XP_011170472.1: uncharacterized protein LOC105203382 [Solenopsis invicta]	6.38726e-48
cont3127	XP_011632022.1: uncharacterized protein LOC105423807 [Pogonomyrmex barbatus]	2.78906e-11
cont3134	XP_011695746.1: speckle-type POZ protein-like isoform X2 [Wasmannia auropunctata]	2.55342e-93
cont3136	XP_011859095.1: uncharacterized protein LOC105556608 [Vollenhovia emeryi]	0.0
cont3140	XP_011873949.1: chymotrypsin-2-like [Vollenhovia emeryi]	2.42267e-107
cont3143	XP_014611713.1: copper-transporting ATPase 1 [Polistes canadensis]	4.32489e-14
cont3144	XP_014246261.1: retrovirus-related Pol polyprotein from transposon TNT 1-94 [Cimex lectularius]	5.73193e-51
cont3145	XP_011861774.1: uncharacterized protein LOC105558604 [Vollenhovia emeryi]	3.87591e-11
cont3146	XP_011876905.1: coiled-coil domain-containing protein 132 [Vollenhovia emeryi]	0.0
cont3147	XP_011875288.1: sodium/hydrogen exchanger 7 isoform X6 [Vollenhovia emeryi]	1.94706e-16
cont3148	XP_011161176.1: phospholipase B1, membrane-associated-like [Solenopsis invicta]	0.0
cont3149	XP_011164770.1: pseudouridylate synthase 7 homolog [Solenopsis invicta]	0.0
cont3150	XP_011068223.1: ARF GTPase-activating protein GIT1, partial [Acromyrmex echinatior]	3.38172e-57
cont3151	XP_014488466.1: putative acyl-CoA-binding protein isoform X2 [Dinoponera quadriceps]	5.4335e-18
cont3152	XP_017021020.1: actin-1, partial [Drosophila kikkawai]	2.33961e-92
cont3153	XP_016914557.1: actin-5C [Apis cerana]	1.32413e-89
cont3154	XP_012236310.1: actin, indirect flight muscle-like [Bombus impatiens]	5.60459e-156
cont3157	XP_011859239.1: uncharacterized protein LOC105556748 [Vollenhovia emeryi]	1.37939e-69
cont3158	XP_012056931.1: translocon-associated protein subunit delta [Atta cephalotes]	6.10751e-93
cont3159	XP_011160061.1: uncharacterized protein LOC105196040 [Solenopsis invicta]	0.0
cont3161	XP_011058821.1: uncharacterized protein LOC105148663 [Acromyrmex echinatior]	3.51145e-07
cont3162	XP_011881954.1: isoleucine--tRNA ligase, mitochondrial [Vollenhovia emeryi]	0.0
cont3165	XP_011698231.1: post-GPI attachment to proteins factor 2-like [Wasmannia auropunctata]	3.34127e-170
cont3166	XP_011068454.1: xylosyltransferase oxt [Acromyrmex echinatior]	0.0
cont3168	XP_011877149.1: adenylate kinase 9-like [Vollenhovia emeryi]	0.0
cont3169	XP_011647488.1: serine/threonine-protein phosphatase Pgam5, mitochondrial-like [Pogonomyrmex barbatus]	1.24162e-86
cont3170	XP_012061886.1: mediator of RNA polymerase II transcription subunit 25 [Atta cephalotes]	0.0
cont3173	XP_012547423.1: uncharacterized protein LOC105841932 [Bombyx mori]	6.29762e-17
cont3174	XP_014480518.1: protein O-GlcNAcase [Dinoponera quadriceps]	0.0
cont3175	XP_011689281.1: protein APCDD1-like [Wasmannia auropunctata]	0.0
cont3176	XP_011171793.1: 5-aminolevulinate synthase, erythroid-specific, mitochondrial [Solenopsis invicta]	3.10052e-14
cont3177	XP_011171793.1: 5-aminolevulinate synthase, erythroid-specific, mitochondrial [Solenopsis invicta]	2.67307e-14
cont3178	XP_011863904.1: tyrosine-protein kinase hopscotch isoform X2 [Vollenhovia emeryi]	4.21639e-10
cont3180	XP_011169971.1: X-linked retinitis pigmentosa GTPase regulator-interacting protein 1-like, partial [Solenopsis invicta]	2.01732e-32
cont3181	XP_011869303.1: aspartate aminotransferase, mitochondrial [Vollenhovia emeryi]	7.40432e-63
cont3182	XP_011869303.1: aspartate aminotransferase, mitochondrial [Vollenhovia emeryi]	0.0
cont3183	XP_011690689.1: 26S proteasome non-ATPase regulatory subunit 7 [Wasmannia auropunctata]	0.0
cont3185	XP_011866080.1: CAD protein [Vollenhovia emeryi]	0.0
cont3186	XP_011174522.1: methylated-DNA--protein-cysteine methyltransferase [Solenopsis invicta]	8.06758e-84
cont3187	XP_014479655.1: protein unc-45 homolog B [Dinoponera quadriceps]	5.477e-65
cont3188	XP_012532414.1: 26S proteasome non-ATPase regulatory subunit 12 [Monomorium pharaonis]	1.00107e-174
cont3189	XP_011703063.1: nuclear hormone receptor FTZ-F1 beta [Wasmannia auropunctata]	0.0
cont3190	XP_011055280.1: dihydrolipoyl dehydrogenase, mitochondrial [Acromyrmex echinatior]	1.01103e-116
cont3191	XP_011875344.1: tyrosine-protein phosphatase non-receptor type 4 isoform X2 [Vollenhovia emeryi]	0.0
cont3194	XP_011640899.1: uncharacterized protein LOC105429547 [Pogonomyrmex barbatus]	7.81153e-19
cont3195	XP_012060220.1: baculoviral IAP repeat-containing protein 7-B-like [Atta cephalotes]	1.29573e-30
cont3200	XP_011870620.1: lipase 3-like [Vollenhovia emeryi]	0.0
cont3202	XP_011695879.1: lipase 3-like [Wasmannia auropunctata]	0.0
cont3204	XP_015438324.1: ferrochelatase, mitochondrial [Dufourea novaeangliae]	7.50862e-155
cont3205	XP_012059402.1: uncharacterized protein LOC105622595 [Atta cephalotes]	9.63216e-36
cont3206	XP_011862850.1: trypsin-3 isoform X2 [Vollenhovia emeryi]	2.91292e-170
cont3207	XP_011692391.1: peroxisomal membrane protein PEX16 [Wasmannia auropunctata]	0.0
cont3209	XP_012061798.1: guanine nucleotide-binding protein subunit beta-like protein [Atta cephalotes]	7.85169e-35
cont3210	XP_015597000.1: uncharacterized protein LOC107268591 [Cephus cinctus]	7.46845e-05
cont3212	XP_011707182.1: protein farnesyltransferase subunit beta isoform X1 [Wasmannia auropunctata]	6.75233e-06
cont3213	XP_011704575.1: guanine nucleotide-binding protein G(s) subunit alpha isoform X1 [Wasmannia auropunctata]	0.0
cont3214	XP_011704590.1: probable phenylalanine--tRNA ligase beta subunit [Wasmannia auropunctata]	0.0
cont3218	XP_012246486.1: ATP-dependent DNA helicase srs2-like [Bombus impatiens]	3.1755e-17
cont3219	XP_012060725.1: probable G-protein coupled receptor No9 [Atta cephalotes]	5.48821e-58
cont3226	XP_011872997.1: probable tubulin polyglutamylase TTLL2 isoform X1 [Vollenhovia emeryi]	0.0
cont3227	XP_012543023.1: fatty acyl-CoA reductase 1-like, partial [Monomorium pharaonis]	5.31535e-54
cont3231	XP_011690022.1: PHD finger protein 20 isoform X2 [Wasmannia auropunctata]	2.95987e-151
cont3233	XP_016996553.1: uncharacterized ABC transporter ATP-binding protein YheS-like, partial [Drosophila takahashii]	3.18289e-21
cont3236	XP_011637103.1: structural maintenance of chromosomes protein 6 [Pogonomyrmex barbatus]	9.28311e-48
cont3239	XP_011872931.1: uncharacterized protein LOC105564830 [Vollenhovia emeryi]	0.0
cont3240	XP_011881360.1: aminoacylase-1-like [Vollenhovia emeryi]	2.14257e-28
cont3241	XP_012059163.1: thyrotroph embryonic factor isoform X1 [Atta cephalotes]	1.06248e-36
cont3242	XP_012058377.1: sialin-like [Atta cephalotes]	1.34241e-46
cont3244	XP_011865432.1: ATP-citrate synthase [Vollenhovia emeryi]	0.0
cont3246	XP_013093951.1: NAD-specific glutamate dehydrogenase-like, partial [Biomphalaria glabrata]	5.68599e-75
cont3247	XP_011876723.1: eye-specific diacylglycerol kinase isoform X2 [Vollenhovia emeryi]	4.82837e-145
cont3251	XP_011637763.1: putative sodium-coupled neutral amino acid transporter 11 isoform X2 [Pogonomyrmex barbatus]	2.91514e-33
cont3252	XP_011637764.1: mitogen-activated protein kinase kinase kinase 7-like [Pogonomyrmex barbatus]	9.52329e-07
cont3254	XP_011872372.1: L-lactate dehydrogenase isoform X2 [Vollenhovia emeryi]	5.9297e-18
cont3263	XP_011866314.1: sodium/bile acid cotransporter 7-like [Vollenhovia emeryi]	1.13889e-166
cont3264	XP_011702040.1: tRNA-splicing endonuclease subunit Sen34 [Wasmannia auropunctata]	3.72063e-162
cont3268	XP_011167625.1: AT-rich interactive domain-containing protein 4A isoform X1 [Solenopsis invicta]	2.36356e-53
cont3269	XP_011630232.1: transcription elongation factor SPT6 isoform X1 [Pogonomyrmex barbatus]	6.74776e-79
cont3270	XP_013195491.1: mucin-2-like [Amyelois transitella]	2.44438e-76
cont3272	XP_011861692.1: DNA-directed RNA polymerase I subunit RPA1 [Vollenhovia emeryi]	0.0
cont3273	XP_011695492.1: MATH and LRR domain-containing protein PFE0570w [Wasmannia auropunctata]	0.0
cont3274	XP_011695492.1: MATH and LRR domain-containing protein PFE0570w [Wasmannia auropunctata]	5.06504e-141
cont3275	XP_011690608.1: dynein heavy chain 2, axonemal [Wasmannia auropunctata]	3.19975e-134
cont3276	XP_011687219.1: uncharacterized protein LOC105449622 isoform X2 [Wasmannia auropunctata]	0.0
cont3278	XP_014225884.1: uncharacterized protein LOC106651747 [Trichogramma pretiosum]	2.14707e-12
cont3280	XP_011635937.1: uncharacterized protein F21D5.5 isoform X1 [Pogonomyrmex barbatus]	0.0
cont3281	XP_014477217.1: coiled-coil domain-containing protein 134-like [Dinoponera quadriceps]	0.012931
cont3282	XP_012543722.1: uncharacterized protein LOC105841137, partial [Monomorium pharaonis]	0.00424663
cont3283	XP_015125326.1: ATP-binding/permease protein CydC-like [Diachasma alloeum]	6.08201e-05
cont3285	XP_011062708.1: biotin--protein ligase isoform X2 [Acromyrmex echinatior]	4.42376e-44
cont3288	XP_011163326.1: uncharacterized protein LOC105198337 [Solenopsis invicta]	1.93625e-26
cont3291	XP_011882404.1: multiple epidermal growth factor-like domains protein 10 isoform X1 [Vollenhovia emeryi]	1.55056e-09
cont3296	XP_011705995.1: uncharacterized protein LOC105461206 isoform X3 [Wasmannia auropunctata]	1.2487e-08
cont3301	XP_011705811.1: alpha-tocopherol transfer protein-like, partial [Wasmannia auropunctata]	9.2655e-13
cont3302	XP_011704178.1: ribonuclease Oy [Wasmannia auropunctata]	4.27809e-129
cont3304	XP_011868784.1: cytochrome b5 reductase 4 isoform X1 [Vollenhovia emeryi]	5.74809e-28
cont3305	XP_011633027.1: LOW QUALITY PROTEIN: neural-cadherin-like [Pogonomyrmex barbatus]	0.0
cont3306	XP_011694812.1: UNC93-like protein [Wasmannia auropunctata]	0.0
cont3308	XP_012532787.1: uncharacterized protein LOC105834670 [Monomorium pharaonis]	3.86657e-90
cont3310	XP_011632072.1: uncharacterized protein LOC105423848 [Pogonomyrmex barbatus]	7.39834e-143
cont3311	XP_011872963.1: E3 ubiquitin-protein ligase MARCH8-like [Vollenhovia emeryi]	6.25755e-164
cont3313	XP_011174067.1: ATP-binding cassette sub-family G member 4-like, partial [Solenopsis invicta]	0.0122845
cont3315	XP_011879277.1: U7 snRNA-associated Sm-like protein LSm11 [Vollenhovia emeryi]	1.33559e-54
cont3316	XP_012532525.1: endochitinase [Monomorium pharaonis]	0.0
cont3318	XP_011690409.1: uncharacterized protein LOC105451497 isoform X2 [Wasmannia auropunctata]	6.05735e-30
cont3319	XP_015510071.1: uncharacterized protein LOC107217180 [Neodiprion lecontei]	0.0
cont3320	XP_011166573.1: uncharacterized protein LOC105200633 [Solenopsis invicta]	1.23818e-62
cont3324	XP_011055804.1: uncharacterized protein LOC105146885 [Acromyrmex echinatior]	0.0
cont3325	XP_001600543.1: lysosomal aspartic protease-like [Nasonia vitripennis]	5.37009e-29
cont3327	XP_011859870.1: uncharacterized protein LOC105557283 [Vollenhovia emeryi]	1.08656e-08
cont3330	XP_011051698.1: geranylgeranyl transferase type-2 subunit alpha isoform X1 [Acromyrmex echinatior]	0.0
cont3332	XP_011702455.1: uncharacterized protein LOC105458667 [Wasmannia auropunctata]	1.42513e-23
cont3333	XP_011174633.1: uncharacterized protein LOC105206870 [Solenopsis invicta]	2.32711e-14
cont3337	XP_011858588.1: uncharacterized protein LOC105556126 [Vollenhovia emeryi]	1.07915e-07
cont3338	XP_011056478.1: potassium voltage-gated channel protein Shab isoform X1 [Acromyrmex echinatior]	0.0
cont3341	XP_011881982.1: uncharacterized protein LOC105569838 isoform X1 [Vollenhovia emeryi]	4.35125e-92
cont3344	XP_015436579.1: uncharacterized protein LOC107191941 [Dufourea novaeangliae]	0.0285458
cont3345	XP_011165086.1: N-alpha-acetyltransferase 30-like [Solenopsis invicta]	1.12571e-58
cont3346	XP_012232588.1: LOW QUALITY PROTEIN: uncharacterized protein LOC105678111 [Linepithema humile]	0.0
cont3350	XP_011858426.1: uncharacterized protein LOC105555983 [Vollenhovia emeryi]	3.15308e-135
cont3352	XP_011875427.1: probable oligoribonuclease [Vollenhovia emeryi]	2.44839e-79
cont3353	XP_011873558.1: mRNA-decapping enzyme 1B [Vollenhovia emeryi]	0.0
cont3354	XP_012215097.1: myotubularin-related protein 13 [Linepithema humile]	1.51337e-29
cont3357	XP_012214839.1: putative golgin subfamily A member 6-like protein 6 [Linepithema humile]	3.79729e-68
cont3358	XP_011704722.1: cytoplasmic aconitate hydratase-like isoform X2 [Wasmannia auropunctata]	0.0
[truncated: 73,847 more rows]
