# Supplementary material for: Immune challenge reduces gut microbial diversity and triggers fertility-dependent gene expression changes in a social insect
Source: BMC Genomics. 2020 Nov 23;21:816. doi: 10.1186/s12864-020-07191-9 (PMC7682046; doi:10.1186/s12864-020-07191-9)
Supplement: Supplementary file 1 — Additional file 1. Additional methodological details, Figures S1 and S2 and Table S2. Description of additional supplementary tables (Tables S1, S3-S18) are also provided. [file 12864_2020_7191_MOESM1_ESM.zip › Table_S4.xlsx]

## Sheet: a)
Metabolic pathways
iolG	myo-inositol 2-dehydrogenase / D-chiro-inositol 1-dehydrogenase [EC:1.1.1.18
uxuB	fructuronate reductase
hemG	menaquinone-dependent protoporphyrinogen oxidase
pdh	phenylalanine dehydrogenase
nuoA	NADH-quinone oxidoreductase subunit A
nuoK	NADH-quinone oxidoreductase subunit K
methyl coenzyme M reductase
E1.11.1.7	peroxidase
E1.14.13.1	salicylate hydroxylase
phhA	phenylalanine-4-hydroxylase
HMOX1	heme oxygenase 1
CYP21A	steroid 21-monooxygenase
ATS1	glycerol-3-phosphate O-acyltransferase
hprT	hypoxanthine phosphoribosyltransferase
E2.4.2.24	1,4-beta-D-xylan synthase
cysC	adenylylsulfate kinase
neuA	N-acylneuraminate cytidylyltransferase
Biosynthesis of secondary metabolites
hemG	menaquinone-dependent protoporphyrinogen oxidase
pdh	phenylalanine dehydrogenase
E1.11.1.7	peroxidase
HMOX1	heme oxygenase 1
ATS1	glycerol-3-phosphate O-acyltransferase
hprT	hypoxanthine phosphoribosyltransferase
Microbial metabolism in diverse environments
iolG	myo-inositol 2-dehydrogenase / D-chiro-inositol 1-dehydrogenase [EC:1.1.1.18
methyl coenzyme M reductase
E1.14.13.1	salicylate hydroxylase
cysC	adenylylsulfate kinase
Purine metabolism
hprT	hypoxanthine phosphoribosyltransferase
cysC	adenylylsulfate kinase
Phenylalanine	tyrosine and tryptophan biosynthesis
pdh	phenylalanine dehydrogenase
phhA	phenylalanine-4-hydroxylase
Biosynthesis of antibiotics
iolG	myo-inositol 2-dehydrogenase / D-chiro-inositol 1-dehydrogenase [EC:1.1.1.18
pdh	phenylalanine dehydrogenase
TGF-beta signaling pathway
NOG
DCN
Porphyrin and chlorophyll metabolism
hemG	menaquinone-dependent protoporphyrinogen oxidase
HMOX1	heme oxygenase 1
Amino sugar and nucleotide sugar metabolism
E2.4.2.24	1,4-beta-D-xylan synthase
neuA	N-acylneuraminate cytidylyltransferase
Folate biosynthesis
SE	pyrimidodiazepine synthase
phhA	phenylalanine-4-hydroxylase
Oxidative phosphorylation
nuoA	NADH-quinone oxidoreductase subunit A
nuoK	NADH-quinone oxidoreductase subunit K
Phenylalanine metabolism
pdh	phenylalanine dehydrogenase
phhA	phenylalanine-4-hydroxylase
Olfactory transduction
ADRBK	beta-adrenergic-receptor kinase
Chemokine signaling pathway
ADRBK	beta-adrenergic-receptor kinase
Phototransduction - fly
ADRBK	beta-adrenergic-receptor kinase
Mineral absorption
HMOX1	heme oxygenase 1
Endocytosis
ADRBK	beta-adrenergic-receptor kinase
Cortisol synthesis and secretion
CYP21A	steroid 21-monooxygenase
Phenylpropanoid biosynthesis
E1.11.1.7	peroxidase
HIF-1 signaling pathway
HMOX1	heme oxygenase 1
Glutathione metabolism
SE	pyrimidodiazepine synthase
Tyrosine metabolism
pdh	phenylalanine dehydrogenase
Proteoglycans in cancer
DCN
Cushing syndrome
CYP21A	steroid 21-monooxygenase
Morphine addiction
ADRBK	beta-adrenergic-receptor kinase
Naphthalene degradation
E1.14.13.1	salicylate hydroxylase
Steroid hormone biosynthesis
CYP21A	steroid 21-monooxygenase
Glycerophospholipid metabolism
ATS1	glycerol-3-phosphate O-acyltransferase
Glutamatergic synapse
ADRBK	beta-adrenergic-receptor kinase
Pathways in cancer
HMOX1	heme oxygenase 1
Polycyclic aromatic hydrocarbon degradation
E1.14.13.1	salicylate hydroxylase
Aldosterone synthesis and secretion
CYP21A	steroid 21-monooxygenase
Fluid shear stress and atherosclerosis
HMOX1	heme oxygenase 1
Sulfur metabolism
cysC	adenylylsulfate kinase
Dioxin degradation
E1.14.13.1	salicylate hydroxylase
Methane metabolism
methyl coenzyme M reductase
MicroRNAs in cancer
HMOX1	heme oxygenase 1
Degradation of aromatic compounds
E1.14.13.1	salicylate hydroxylase
Glycerolipid metabolism
ATS1	glycerol-3-phosphate O-acyltransferase
Hedgehog signaling pathway
ADRBK	beta-adrenergic-receptor kinase
Ferroptosis
HMOX1	heme oxygenase 1
Alcoholism
CAMKK1	calcium/calmodulin-dependent protein kinase kinase 1
Inositol phosphate metabolism
iolG	myo-inositol 2-dehydrogenase / D-chiro-inositol 1-dehydrogenase [EC:1.1.1.18
Biosynthesis of amino acids
phhA	phenylalanine-4-hydroxylase
RNA degradation
pcnB	poly(A) polymerase
Streptomycin biosynthesis
iolG	myo-inositol 2-dehydrogenase / D-chiro-inositol 1-dehydrogenase [EC:1.1.1.18
Pentose and glucuronate interconversions
uxuB	fructuronate reductase
Hepatocellular carcinoma
HMOX1	heme oxygenase 1
Neuroactive ligand-receptor interaction
HRH3	histamine receptor
Drug metabolism - other enzymes
hprT	hypoxanthine phosphoribosyltransferase

## Sheet: b)
TGF-beta pathway
NOG	noggin

## Sheet: c)
Metabolic pathways
E1.1.1.82	malate dehydrogenase (NADP+)
tyrC	cyclohexadieny/prephenate dehydrogenase [EC:1.3.1.43
hemG	menaquinone-dependent protoporphyrinogen oxidase
sdhB	succinate dehydrogenase / fumarate reductase	iron-sulfur subunit [EC:1.3.5.1
pdh	phenylalanine dehydrogenase
LYS1	saccharopine dehydrogenase (NAD+	L-lysine forming)
nuoC	NADH-quinone oxidoreductase subunit C
cysJ	sulfite reductase (NADPH) flavoprotein alpha-component
E1.13.11.4	gentisate 1	2-dioxygenase
phhA	phenylalanine-4-hydroxylase
CYP21A	steroid 21-monooxygenase
ATS1	glycerol-3-phosphate O-acyltransferase
GALNT	polypeptide N-acetylgalactosaminyltransferase
UGCG	ceramide glucosyltransferase
OST4	oligosaccharyl transferase complex subunit
GYG1	glycogenin
hprT	hypoxanthine phosphoribosyltransferase
murA	UDP-N-acetylglucosamine 1-carboxyvinyltransferase
cysC	adenylylsulfate kinase
Biosynthesis of secondary metabolites
tyrC	cyclohexadieny/prephenate dehydrogenase [EC:1.3.1.43
hemG	menaquinone-dependent protoporphyrinogen oxidase
sdhB	succinate dehydrogenase / fumarate reductase	iron-sulfur subunit [EC:1.3.5.1
pdh	phenylalanine dehydrogenase
LYS1	saccharopine dehydrogenase (NAD+	L-lysine forming)
ATS1	glycerol-3-phosphate O-acyltransferase
hprT	hypoxanthine phosphoribosyltransferase
Microbial metabolism in diverse environments
E1.1.1.82	malate dehydrogenase (NADP+)
sdhB	succinate dehydrogenase / fumarate reductase	iron-sulfur subunit [EC:1.3.5.1
cysJ	sulfite reductase (NADPH) flavoprotein alpha-component
E1.13.11.4	gentisate 1	2-dioxygenase
cysC	adenylylsulfate kinase
Biosynthesis of amino acids
tyrC	cyclohexadieny/prephenate dehydrogenase [EC:1.3.1.43
LYS1	saccharopine dehydrogenase (NAD+	L-lysine forming)
phhA	phenylalanine-4-hydroxylase
Biosynthesis of antibiotics
sdhB	succinate dehydrogenase / fumarate reductase	iron-sulfur subunit [EC:1.3.5.1
pdh	phenylalanine dehydrogenase
LYS1	saccharopine dehydrogenase (NAD+	L-lysine forming)
Phenylalanine	tyrosine and tryptophan biosynthesis
tyrC	cyclohexadieny/prephenate dehydrogenase [EC:1.3.1.43
pdh	phenylalanine dehydrogenase
phhA	phenylalanine-4-hydroxylase
Sulfur metabolism
cysJ	sulfite reductase (NADPH) flavoprotein alpha-component
cysC	adenylylsulfate kinase
Lysine degradation
LYS1	saccharopine dehydrogenase (NAD+	L-lysine forming)
PLOD1	procollagen-lysine	2-oxoglutarate 5-dioxygenase 1
Phenylalanine metabolism
pdh	phenylalanine dehydrogenase
phhA	phenylalanine-4-hydroxylase
Purine metabolism
hprT	hypoxanthine phosphoribosyltransferase
cysC	adenylylsulfate kinase
Carbon metabolism
E1.1.1.82	malate dehydrogenase (NADP+)
sdhB	succinate dehydrogenase / fumarate reductase	iron-sulfur subunit [EC:1.3.5.1
Oxidative phosphorylation
sdhB	succinate dehydrogenase / fumarate reductase	iron-sulfur subunit [EC:1.3.5.1
nuoC	NADH-quinone oxidoreductase subunit C
Tyrosine metabolism
pdh	phenylalanine dehydrogenase
E1.13.11.4	gentisate 1	2-dioxygenase
Cushing syndrome
CYP21A	steroid 21-monooxygenase
Mucin type O-glycan biosynthesis
GALNT	polypeptide N-acetylgalactosaminyltransferase
Glycerolipid metabolism
ATS1	glycerol-3-phosphate O-acyltransferase
Peptidoglycan biosynthesis
murA	UDP-N-acetylglucosamine 1-carboxyvinyltransferase
N-Glycan biosynthesis
OST4	oligosaccharyl transferase complex subunit
Sphingolipid metabolism
UGCG	ceramide glucosyltransferase
Carbon fixation pathways in prokaryotes
sdhB	succinate dehydrogenase / fumarate reductase	iron-sulfur subunit [EC:1.3.5.1
Amino sugar and nucleotide sugar metabolism
murA	UDP-N-acetylglucosamine 1-carboxyvinyltransferase
Butanoate metabolism
sdhB	succinate dehydrogenase / fumarate reductase	iron-sulfur subunit [EC:1.3.5.1
Aldosterone synthesis and secretion
CYP21A	steroid 21-monooxygenase
Porphyrin and chlorophyll metabolism
hemG	menaquinone-dependent protoporphyrinogen oxidase
Starch and sucrose metabolism
GYG1	glycogenin
Carbon fixation in photosynthetic organisms
E1.1.1.82	malate dehydrogenase (NADP+)
Protein processing in endoplasmic reticulum
OST4	oligosaccharyl transferase complex subunit
RNA degradation
pcnB	poly(A) polymerase
Citrate cycle (TCA cycle)
sdhB	succinate dehydrogenase / fumarate reductase	iron-sulfur subunit [EC:1.3.5.1
Pyruvate metabolism
E1.1.1.82	malate dehydrogenase (NADP+)
Cortisol synthesis and secretion
CYP21A	steroid 21-monooxygenase
Drug metabolism - other enzymes
hprT	hypoxanthine phosphoribosyltransferase
Novobiocin biosynthesis
tyrC	cyclohexadieny/prephenate dehydrogenase [EC:1.3.1.43
Glycerophospholipid metabolism
ATS1	glycerol-3-phosphate O-acyltransferase
Lysine biosynthesis
LYS1	saccharopine dehydrogenase (NAD+	L-lysine forming)
Various types of N-glycan biosynthesis
OST4	oligosaccharyl transferase complex subunit
Neuroactive ligand-receptor interaction
HRH3	histamine receptor
Folate biosynthesis
phhA	phenylalanine-4-hydroxylase
Steroid hormone biosynthesis
CYP21A	steroid 21-monooxygenase

## Sheet: d)
Metabolic pathways
uxuB	fructuronate reductase
E1.1.1.82	malate dehydrogenase (NADP+)
tyrC	cyclohexadieny/prephenate dehydrogenase [EC:1.3.1.43
hemG	menaquinone-dependent protoporphyrinogen oxidase
pdh	phenylalanine dehydrogenase
nuoA	NADH-quinone oxidoreductase subunit A
cysJ	sulfite reductase (NADPH) flavoprotein alpha-component
HMOX1	heme oxygenase 1
PLMT	phosphatidyl-N-methylethanolamine N-methyltransferase
ATS1	glycerol-3-phosphate O-acyltransferase
UGCG	ceramide glucosyltransferase
GYG1	glycogenin
cysC	adenylylsulfate kinase
ndk	nucleoside-diphosphate kinase
Biosynthesis of secondary metabolites
tyrC	cyclohexadieny/prephenate dehydrogenase [EC:1.3.1.43
hemG	menaquinone-dependent protoporphyrinogen oxidase
pdh	phenylalanine dehydrogenase
HMOX1	heme oxygenase 1
PLMT	phosphatidyl-N-methylethanolamine N-methyltransferase
ATS1	glycerol-3-phosphate O-acyltransferase
ndk	nucleoside-diphosphate kinase
Microbial metabolism in diverse environments
E1.1.1.82	malate dehydrogenase (NADP+)
cdhB	acetyl-CoA decarbonylase/synthase complex subunit
cysJ	sulfite reductase (NADPH) flavoprotein alpha-component
cysC	adenylylsulfate kinase
Sulfur metabolism
cysJ	sulfite reductase (NADPH) flavoprotein alpha-component
cysC	adenylylsulfate kinase
Phenylalanine	tyrosine and tryptophan biosynthesis
tyrC	cyclohexadieny/prephenate dehydrogenase [EC:1.3.1.43
pdh	phenylalanine dehydrogenase
Biosynthesis of antibiotics
pdh	phenylalanine dehydrogenase
ndk	nucleoside-diphosphate kinase
Carbon metabolism
E1.1.1.82	malate dehydrogenase (NADP+)
cdhB	acetyl-CoA decarbonylase/synthase complex subunit
Purine metabolism
cysC	adenylylsulfate kinase
ndk	nucleoside-diphosphate kinase
Glycerophospholipid metabolism
PLMT	phosphatidyl-N-methylethanolamine N-methyltransferase
ATS1	glycerol-3-phosphate O-acyltransferase
Porphyrin and chlorophyll metabolism
hemG	menaquinone-dependent protoporphyrinogen oxidase
HMOX1	heme oxygenase 1
Pentose and glucuronate interconversions
uxuB	fructuronate reductase
Sphingolipid metabolism
UGCG	ceramide glucosyltransferase
MicroRNAs in cancer
HMOX1	heme oxygenase 1
Selenocompound metabolism
INMT	methyltransferase [EC:2.1.1.49
Novobiocin biosynthesis
tyrC	cyclohexadieny/prephenate dehydrogenase [EC:1.3.1.43
Drug metabolism - other enzymes
ndk	nucleoside-diphosphate kinase
Pathways in cancer
HMOX1	heme oxygenase 1
TGF-beta signaling pathway
NOG
Pyrimidine metabolism
ndk	nucleoside-diphosphate kinase
Methane metabolism
cdhB	acetyl-CoA decarbonylase/synthase complex subunit
Glycerolipid metabolism
ATS1	glycerol-3-phosphate O-acyltransferase
Carbon fixation in photosynthetic organisms
E1.1.1.82	malate dehydrogenase (NADP+)
Fluid shear stress and atherosclerosis
HMOX1	heme oxygenase 1
Calcium signaling pathway
HRH2	histamine receptor
Starch and sucrose metabolism
GYG1	glycogenin
Lysine degradation
PLOD1	procollagen-lysine	2-oxoglutarate 5-dioxygenase 1
Tyrosine metabolism
pdh	phenylalanine dehydrogenase
MAPK signaling pathway - plant
ndk	nucleoside-diphosphate kinase
Pyruvate metabolism
E1.1.1.82	malate dehydrogenase (NADP+)
Gastric acid secretion
HRH2	histamine receptor
Biosynthesis of amino acids
tyrC	cyclohexadieny/prephenate dehydrogenase [EC:1.3.1.43
RNA degradation
pcnB	poly(A) polymerase
Glutathione metabolism
SE	pyrimidodiazepine synthase
Tryptophan metabolism
INMT	methyltransferase [EC:2.1.1.49
HIF-1 signaling pathway
HMOX1	heme oxygenase 1
Folate biosynthesis
SE	pyrimidodiazepine synthase
Hepatocellular carcinoma
HMOX1	heme oxygenase 1
Oxidative phosphorylation
nuoA	NADH-quinone oxidoreductase subunit A
Neuroactive ligand-receptor interaction
HRH2	histamine receptor
Phenylalanine metabolism
pdh	phenylalanine dehydrogenase
Mineral absorption
HMOX1	heme oxygenase 1
Ferroptosis
HMOX1	heme oxygenase 1

## Sheet: e)
Metabolic pathways
Microbial metabolism in diverse environments
Fructose and mannose metabolism
Degradation of aromatic compounds
Glyoxylate and dicarboxylate metabolism
Polycyclic aromatic hydrocarbon degradation
Naphthalene degradation
Carbon metabolism
Cyanoamino acid metabolism
Biosynthesis of amino acids
Dioxin degradation
Antifolate resistance
Methane metabolism
One carbon pool by folate
Biosynthesis of antibiotics
Glycine	serine and threonine metabolism
Biosynthesis of secondary metabolites

## Sheet: f)
Metabolic pathways
iolG	myo-inositol 2-dehydrogenase / D-chiro-inositol 1-dehydrogenase [EC:1.1.1.18
uxuB	fructuronate reductase
leuB	3-isopropylmalate dehydrogenase
tyrC	cyclohexadieny/prephenate dehydrogenase [EC:1.3.1.43
hemG	menaquinone-dependent protoporphyrinogen oxidase
DHODH	dihydroorotate dehydrogenase
pdh	phenylalanine dehydrogenase
E1.11.1.7	peroxidase
E1.14.13.1	salicylate hydroxylase
phhA	phenylalanine-4-hydroxylase
CYP21A	steroid 21-monooxygenase
anfG	nitrogenase delta subunit
glyA	glycine hydroxymethyltransferase
argJ	glutamate N-acetyltransferase / amino-acid N-acetyltransferase [EC:2.3.1.35
ATS1	glycerol-3-phosphate O-acyltransferase
GALNT	polypeptide N-acetylgalactosaminyltransferase
UGCG	ceramide glucosyltransferase
hprT	hypoxanthine phosphoribosyltransferase
SIAT4A	beta-galactoside alpha-2	3-sialyltransferase (sialyltransferase 4A)
cysC	adenylylsulfate kinase
Biosynthesis of secondary metabolites
leuB	3-isopropylmalate dehydrogenase
tyrC	cyclohexadieny/prephenate dehydrogenase [EC:1.3.1.43
hemG	menaquinone-dependent protoporphyrinogen oxidase
pdh	phenylalanine dehydrogenase
E1.11.1.7	peroxidase
glyA	glycine hydroxymethyltransferase
argJ	glutamate N-acetyltransferase / amino-acid N-acetyltransferase [EC:2.3.1.35
ATS1	glycerol-3-phosphate O-acyltransferase
hprT	hypoxanthine phosphoribosyltransferase
Microbial metabolism in diverse environments
iolG	myo-inositol 2-dehydrogenase / D-chiro-inositol 1-dehydrogenase [EC:1.1.1.18
cdhB	acetyl-CoA decarbonylase/synthase complex subunit
E1.14.13.1	salicylate hydroxylase
anfG	nitrogenase delta subunit
glyA	glycine hydroxymethyltransferase
cysC	adenylylsulfate kinase
Biosynthesis of amino acids
leuB	3-isopropylmalate dehydrogenase
tyrC	cyclohexadieny/prephenate dehydrogenase [EC:1.3.1.43
phhA	phenylalanine-4-hydroxylase
glyA	glycine hydroxymethyltransferase
argJ	glutamate N-acetyltransferase / amino-acid N-acetyltransferase [EC:2.3.1.35
Biosynthesis of antibiotics
iolG	myo-inositol 2-dehydrogenase / D-chiro-inositol 1-dehydrogenase [EC:1.1.1.18
pdh	phenylalanine dehydrogenase
glyA	glycine hydroxymethyltransferase
argJ	glutamate N-acetyltransferase / amino-acid N-acetyltransferase [EC:2.3.1.35
Phenylalanine	tyrosine and tryptophan biosynthesis
tyrC	cyclohexadieny/prephenate dehydrogenase [EC:1.3.1.43
pdh	phenylalanine dehydrogenase
phhA	phenylalanine-4-hydroxylase
Folate biosynthesis
SE	pyrimidodiazepine synthase
phhA	phenylalanine-4-hydroxylase
Glycerophospholipid metabolism
ATS1	glycerol-3-phosphate O-acyltransferase
tagD	glycerol-3-phosphate cytidylyltransferase
Endocytosis
GRK1_7	rhodopsin kinase
ADRBK	beta-adrenergic-receptor kinase
Mucin type O-glycan biosynthesis
GALNT	polypeptide N-acetylgalactosaminyltransferase
SIAT4A	beta-galactoside alpha-2	3-sialyltransferase (sialyltransferase 4A)
Methane metabolism
cdhB	acetyl-CoA decarbonylase/synthase complex subunit
glyA	glycine hydroxymethyltransferase
2-Oxocarboxylic acid metabolism
leuB	3-isopropylmalate dehydrogenase
argJ	glutamate N-acetyltransferase / amino-acid N-acetyltransferase [EC:2.3.1.35
Chemokine signaling pathway
GRK1_7	rhodopsin kinase
ADRBK	beta-adrenergic-receptor kinase
Carbon metabolism
cdhB	acetyl-CoA decarbonylase/synthase complex subunit
glyA	glycine hydroxymethyltransferase
Purine metabolism
hprT	hypoxanthine phosphoribosyltransferase
cysC	adenylylsulfate kinase
Phenylalanine metabolism
pdh	phenylalanine dehydrogenase
phhA	phenylalanine-4-hydroxylase
Tyrosine metabolism
pdh	phenylalanine dehydrogenase
Pyrimidine metabolism
DHODH	dihydroorotate dehydrogenase
Valine	leucine and isoleucine biosynthesis
leuB	3-isopropylmalate dehydrogenase
Steroid hormone biosynthesis
CYP21A	steroid 21-monooxygenase
Cortisol synthesis and secretion
CYP21A	steroid 21-monooxygenase
Olfactory transduction
ADRBK	beta-adrenergic-receptor kinase
Glutamatergic synapse
ADRBK	beta-adrenergic-receptor kinase
Sulfur metabolism
cysC	adenylylsulfate kinase
RNA degradation
pcnB	poly(A) polymerase
Glycosphingolipid biosynthesis - ganglio series
SIAT4A	beta-galactoside alpha-2	3-sialyltransferase (sialyltransferase 4A)
Antifolate resistance
glyA	glycine hydroxymethyltransferase
Aldosterone synthesis and secretion
CYP21A	steroid 21-monooxygenase
Glyoxylate and dicarboxylate metabolism
glyA	glycine hydroxymethyltransferase
Cyanoamino acid metabolism
glyA	glycine hydroxymethyltransferase
Morphine addiction
ADRBK	beta-adrenergic-receptor kinase
Nitrogen metabolism
anfG	nitrogenase delta subunit
Arginine biosynthesis
argJ	glutamate N-acetyltransferase / amino-acid N-acetyltransferase [EC:2.3.1.35
Phototransduction - fly
ADRBK	beta-adrenergic-receptor kinase
Porphyrin and chlorophyll metabolism
hemG	menaquinone-dependent protoporphyrinogen oxidase
Streptomycin biosynthesis
iolG	myo-inositol 2-dehydrogenase / D-chiro-inositol 1-dehydrogenase [EC:1.1.1.18
Chloroalkane and chloroalkene degradation
anfG	nitrogenase delta subunit
Glycosphingolipid biosynthesis - globo and isoglobo series
SIAT4A	beta-galactoside alpha-2	3-sialyltransferase (sialyltransferase 4A)
Inositol phosphate metabolism
iolG	myo-inositol 2-dehydrogenase / D-chiro-inositol 1-dehydrogenase [EC:1.1.1.18
Phenylpropanoid biosynthesis
E1.11.1.7	peroxidase
TGF-beta signaling pathway
NOG
C5-Branched dibasic acid metabolism
leuB	3-isopropylmalate dehydrogenase
One carbon pool by folate
glyA	glycine hydroxymethyltransferase
Pentose and glucuronate interconversions
uxuB	fructuronate reductase
Glutathione metabolism
SE	pyrimidodiazepine synthase
Phototransduction
GRK1_7	rhodopsin kinase
Polycyclic aromatic hydrocarbon degradation
E1.14.13.1	salicylate hydroxylase
Hedgehog signaling pathway
ADRBK	beta-adrenergic-receptor kinase
Cushing syndrome
CYP21A	steroid 21-monooxygenase
Naphthalene degradation
E1.14.13.1	salicylate hydroxylase
Dioxin degradation
E1.14.13.1	salicylate hydroxylase
Glycine	serine and threonine metabolism
glyA	glycine hydroxymethyltransferase
Sphingolipid metabolism
UGCG	ceramide glucosyltransferase
Novobiocin biosynthesis
tyrC	cyclohexadieny/prephenate dehydrogenase [EC:1.3.1.43
Degradation of aromatic compounds
E1.14.13.1	salicylate hydroxylase
Glycosaminoglycan biosynthesis - keratan sulfate
SIAT4A	beta-galactoside alpha-2	3-sialyltransferase (sialyltransferase 4A)
Glycerolipid metabolism
ATS1	glycerol-3-phosphate O-acyltransferase
Drug metabolism - other enzymes
hprT	hypoxanthine phosphoribosyltransferase

## Sheet: g)
Metabolic pathways
iolG	myo-inositol 2-dehydrogenase / D-chiro-inositol 1-dehydrogenase [EC:1.1.1.18
IDH3	isocitrate dehydrogenase (NAD+)
E1.1.1.82	malate dehydrogenase (NADP+)
leuB	3-isopropylmalate dehydrogenase
betB	betaine-aldehyde dehydrogenase
tyrC	cyclohexadieny/prephenate dehydrogenase [EC:1.3.1.43
hemG	menaquinone-dependent protoporphyrinogen oxidase
sdhB	succinate dehydrogenase / fumarate reductase	iron-sulfur subunit [EC:1.3.5.1
nuoC	NADH-quinone oxidoreductase subunit C
E1.13.11.4	gentisate 1	2-dioxygenase
phhA	phenylalanine-4-hydroxylase
PLMT	phosphatidyl-N-methylethanolamine N-methyltransferase
glyA	glycine hydroxymethyltransferase
OST4	oligosaccharyl transferase complex subunit
GYG1	glycogenin
murA	UDP-N-acetylglucosamine 1-carboxyvinyltransferase
cysC	adenylylsulfate kinase
Microbial metabolism in diverse environments
iolG	myo-inositol 2-dehydrogenase / D-chiro-inositol 1-dehydrogenase [EC:1.1.1.18
IDH3	isocitrate dehydrogenase (NAD+)
E1.1.1.82	malate dehydrogenase (NADP+)
cdhB	acetyl-CoA decarbonylase/synthase complex subunit
sdhB	succinate dehydrogenase / fumarate reductase	iron-sulfur subunit [EC:1.3.5.1
E1.13.11.4	gentisate 1	2-dioxygenase
glyA	glycine hydroxymethyltransferase
cysC	adenylylsulfate kinase
Biosynthesis of secondary metabolites
IDH3	isocitrate dehydrogenase (NAD+)
leuB	3-isopropylmalate dehydrogenase
tyrC	cyclohexadieny/prephenate dehydrogenase [EC:1.3.1.43
hemG	menaquinone-dependent protoporphyrinogen oxidase
sdhB	succinate dehydrogenase / fumarate reductase	iron-sulfur subunit [EC:1.3.5.1
PLMT	phosphatidyl-N-methylethanolamine N-methyltransferase
glyA	glycine hydroxymethyltransferase
Carbon metabolism
IDH3	isocitrate dehydrogenase (NAD+)
E1.1.1.82	malate dehydrogenase (NADP+)
cdhB	acetyl-CoA decarbonylase/synthase complex subunit
sdhB	succinate dehydrogenase / fumarate reductase	iron-sulfur subunit [EC:1.3.5.1
glyA	glycine hydroxymethyltransferase
Biosynthesis of amino acids
IDH3	isocitrate dehydrogenase (NAD+)
leuB	3-isopropylmalate dehydrogenase
tyrC	cyclohexadieny/prephenate dehydrogenase [EC:1.3.1.43
phhA	phenylalanine-4-hydroxylase
glyA	glycine hydroxymethyltransferase
Biosynthesis of antibiotics
iolG	myo-inositol 2-dehydrogenase / D-chiro-inositol 1-dehydrogenase [EC:1.1.1.18
IDH3	isocitrate dehydrogenase (NAD+)
sdhB	succinate dehydrogenase / fumarate reductase	iron-sulfur subunit [EC:1.3.5.1
glyA	glycine hydroxymethyltransferase
Oxidative phosphorylation
sdhB	succinate dehydrogenase / fumarate reductase	iron-sulfur subunit [EC:1.3.5.1
nuoC	NADH-quinone oxidoreductase subunit C
Citrate cycle (TCA cycle)
IDH3	isocitrate dehydrogenase (NAD+)
sdhB	succinate dehydrogenase / fumarate reductase	iron-sulfur subunit [EC:1.3.5.1
Phenylalanine	tyrosine and tryptophan biosynthesis
tyrC	cyclohexadieny/prephenate dehydrogenase [EC:1.3.1.43
phhA	phenylalanine-4-hydroxylase
2-Oxocarboxylic acid metabolism
IDH3	isocitrate dehydrogenase (NAD+)
leuB	3-isopropylmalate dehydrogenase
Folate biosynthesis
SE	pyrimidodiazepine synthase
phhA	phenylalanine-4-hydroxylase
Glycine	serine and threonine metabolism
betB	betaine-aldehyde dehydrogenase
glyA	glycine hydroxymethyltransferase
Neuroactive ligand-receptor interaction
HRH2	histamine receptor
HRH3	histamine receptor
Methane metabolism
cdhB	acetyl-CoA decarbonylase/synthase complex subunit
glyA	glycine hydroxymethyltransferase
Aldosterone-regulated sodium reabsorption
HSD11B2	corticosteroid 11-beta-dehydrogenase isozyme 2
Glutathione metabolism
SE	pyrimidodiazepine synthase
N-Glycan biosynthesis
OST4	oligosaccharyl transferase complex subunit
Morphine addiction
ADRBK	beta-adrenergic-receptor kinase
Phototransduction - fly
ADRBK	beta-adrenergic-receptor kinase
RNA degradation
pcnB	poly(A) polymerase
Glutamatergic synapse
ADRBK	beta-adrenergic-receptor kinase
Starch and sucrose metabolism
GYG1	glycogenin
Purine metabolism
cysC	adenylylsulfate kinase
Tyrosine metabolism
E1.13.11.4	gentisate 1	2-dioxygenase
Olfactory transduction
ADRBK	beta-adrenergic-receptor kinase
Various types of N-glycan biosynthesis
OST4	oligosaccharyl transferase complex subunit
TGF-beta signaling pathway
DCN
Proteoglycans in cancer
DCN
Cyanoamino acid metabolism
glyA	glycine hydroxymethyltransferase
Inositol phosphate metabolism
iolG	myo-inositol 2-dehydrogenase / D-chiro-inositol 1-dehydrogenase [EC:1.1.1.18
Valine	leucine and isoleucine biosynthesis
leuB	3-isopropylmalate dehydrogenase
Porphyrin and chlorophyll metabolism
hemG	menaquinone-dependent protoporphyrinogen oxidase
Calcium signaling pathway
HRH2	histamine receptor
Chemokine signaling pathway
ADRBK	beta-adrenergic-receptor kinase
Phenylalanine metabolism
phhA	phenylalanine-4-hydroxylase
Glyoxylate and dicarboxylate metabolism
glyA	glycine hydroxymethyltransferase
Protein processing in endoplasmic reticulum
OST4	oligosaccharyl transferase complex subunit
Gastric acid secretion
HRH2	histamine receptor
Butanoate metabolism
sdhB	succinate dehydrogenase / fumarate reductase	iron-sulfur subunit [EC:1.3.5.1
Hedgehog signaling pathway
ADRBK	beta-adrenergic-receptor kinase
Sulfur metabolism
Steroid hormone biosynthesis
Novobiocin biosynthesis
Peptidoglycan biosynthesis
Carbon fixation in photosynthetic organisms
Endocytosis
Antifolate resistance
Carbon fixation pathways in prokaryotes
Streptomycin biosynthesis
Amino sugar and nucleotide sugar metabolism
One carbon pool by folate
Pyruvate metabolism
Glycerophospholipid metabolism
C5-Branched dibasic acid metabolism

## Sheet: h)
TGF-beta pathway
NOG	noggin

## Sheet: i)
Metabolic pathways
iolG	myo-inositol 2-dehydrogenase / D-chiro-inositol 1-dehydrogenase [EC:1.1.1.18
mmsB	3-hydroxyisobutyrate dehydrogenase
IDH3	isocitrate dehydrogenase (NAD+)
uxuB	fructuronate reductase
E1.1.1.82	malate dehydrogenase (NADP+)
leuB	3-isopropylmalate dehydrogenase
ilvC	ketol-acid reductoisomerase
SPR	sepiapterin reductase
betB	betaine-aldehyde dehydrogenase
tyrC	cyclohexadieny/prephenate dehydrogenase [EC:1.3.1.43
hemG	menaquinone-dependent protoporphyrinogen oxidase
sdhB	succinate dehydrogenase / fumarate reductase	iron-sulfur subunit [EC:1.3.5.1
DHODH	dihydroorotate dehydrogenase
gudB	glutamate dehydrogenase
pdh	phenylalanine dehydrogenase
LYS1	saccharopine dehydrogenase (NAD+	L-lysine forming)
nuoA	NADH-quinone oxidoreductase subunit A
nuoC	NADH-quinone oxidoreductase subunit C
nuoK	NADH-quinone oxidoreductase subunit K
methyl coenzyme M reductase
E1.11.1.7	peroxidase
E1.14.13.1	salicylate hydroxylase
phhA	phenylalanine-4-hydroxylase
HMOX1	heme oxygenase 1
SQLE	squalene monooxygenase
CYP21A	steroid 21-monooxygenase
PLMT	phosphatidyl-N-methylethanolamine N-methyltransferase
COQ3	polyprenyldihydroxybenzoate methyltransferase / 3-demethylubiquinol 3-O-methyltransferase [EC:2.1.1.114
glyA	glycine hydroxymethyltransferase
E2.1.2.2	phosphoribosylglycinamide formyltransferase
argJ	glutamate N-acetyltransferase / amino-acid N-acetyltransferase [EC:2.3.1.35
DLAT	pyruvate dehydrogenase E2 component (dihydrolipoamide acetyltransferase)
ATS1	glycerol-3-phosphate O-acyltransferase
cysE	serine O-acetyltransferase
GALNT	polypeptide N-acetylgalactosaminyltransferase
UGCG	ceramide glucosyltransferase
GYG1	glycogenin
hprT	hypoxanthine phosphoribosyltransferase
E2.4.2.24	1	4-beta-D-xylan synthase
SIAT4A	beta-galactoside alpha-2	3-sialyltransferase (sialyltransferase 4A)
murA	UDP-N-acetylglucosamine 1-carboxyvinyltransferase
cysC	adenylylsulfate kinase
neuA	N-acylneuraminate cytidylyltransferase
Biosynthesis of secondary metabolites
IDH3	isocitrate dehydrogenase (NAD+)
leuB	3-isopropylmalate dehydrogenase
ilvC	ketol-acid reductoisomerase
tyrC	cyclohexadieny/prephenate dehydrogenase [EC:1.3.1.43
hemG	menaquinone-dependent protoporphyrinogen oxidase
sdhB	succinate dehydrogenase / fumarate reductase	iron-sulfur subunit [EC:1.3.5.1
pdh	phenylalanine dehydrogenase
LYS1	saccharopine dehydrogenase (NAD+	L-lysine forming)
E1.11.1.7	peroxidase
HMOX1	heme oxygenase 1
SQLE	squalene monooxygenase
PLMT	phosphatidyl-N-methylethanolamine N-methyltransferase
COQ3	polyprenyldihydroxybenzoate methyltransferase / 3-demethylubiquinol 3-O-methyltransferase [EC:2.1.1.114
glyA	glycine hydroxymethyltransferase
E2.1.2.2	phosphoribosylglycinamide formyltransferase
argJ	glutamate N-acetyltransferase / amino-acid N-acetyltransferase [EC:2.3.1.35
DLAT	pyruvate dehydrogenase E2 component (dihydrolipoamide acetyltransferase)
ATS1	glycerol-3-phosphate O-acyltransferase
cysE	serine O-acetyltransferase
hprT	hypoxanthine phosphoribosyltransferase
Microbial metabolism in diverse environments
iolG	myo-inositol 2-dehydrogenase / D-chiro-inositol 1-dehydrogenase [EC:1.1.1.18
IDH3	isocitrate dehydrogenase (NAD+)
E1.1.1.82	malate dehydrogenase (NADP+)
cdhB	acetyl-CoA decarbonylase/synthase complex subunit
sdhB	succinate dehydrogenase / fumarate reductase	iron-sulfur subunit [EC:1.3.5.1
gudB	glutamate dehydrogenase
methyl coenzyme M reductase
E1.14.13.1	salicylate hydroxylase
glyA	glycine hydroxymethyltransferase
DLAT	pyruvate dehydrogenase E2 component (dihydrolipoamide acetyltransferase)
cysE	serine O-acetyltransferase
cysC	adenylylsulfate kinase
Biosynthesis of antibiotics
iolG	myo-inositol 2-dehydrogenase / D-chiro-inositol 1-dehydrogenase [EC:1.1.1.18
IDH3	isocitrate dehydrogenase (NAD+)
ilvC	ketol-acid reductoisomerase
sdhB	succinate dehydrogenase / fumarate reductase	iron-sulfur subunit [EC:1.3.5.1
pdh	phenylalanine dehydrogenase
LYS1	saccharopine dehydrogenase (NAD+	L-lysine forming)
SQLE	squalene monooxygenase
glyA	glycine hydroxymethyltransferase
E2.1.2.2	phosphoribosylglycinamide formyltransferase
argJ	glutamate N-acetyltransferase / amino-acid N-acetyltransferase [EC:2.3.1.35
DLAT	pyruvate dehydrogenase E2 component (dihydrolipoamide acetyltransferase)
Biosynthesis of amino acids
IDH3	isocitrate dehydrogenase (NAD+)
leuB	3-isopropylmalate dehydrogenase
ilvC	ketol-acid reductoisomerase
tyrC	cyclohexadieny/prephenate dehydrogenase [EC:1.3.1.43
LYS1	saccharopine dehydrogenase (NAD+	L-lysine forming)
phhA	phenylalanine-4-hydroxylase
glyA	glycine hydroxymethyltransferase
argJ	glutamate N-acetyltransferase / amino-acid N-acetyltransferase [EC:2.3.1.35
cysE	serine O-acetyltransferase
Carbon metabolism
IDH3	isocitrate dehydrogenase (NAD+)
E1.1.1.82	malate dehydrogenase (NADP+)
cdhB	acetyl-CoA decarbonylase/synthase complex subunit
sdhB	succinate dehydrogenase / fumarate reductase	iron-sulfur subunit [EC:1.3.5.1
glyA	glycine hydroxymethyltransferase
DLAT	pyruvate dehydrogenase E2 component (dihydrolipoamide acetyltransferase)
cysE	serine O-acetyltransferase
2-Oxocarboxylic acid metabolism
IDH3	isocitrate dehydrogenase (NAD+)
leuB	3-isopropylmalate dehydrogenase
ilvC	ketol-acid reductoisomerase
argJ	glutamate N-acetyltransferase / amino-acid N-acetyltransferase [EC:2.3.1.35
Oxidative phosphorylation
sdhB	succinate dehydrogenase / fumarate reductase	iron-sulfur subunit [EC:1.3.5.1
nuoA	NADH-quinone oxidoreductase subunit A
nuoC	NADH-quinone oxidoreductase subunit C
nuoK	NADH-quinone oxidoreductase subunit K
Citrate cycle (TCA cycle)
IDH3	isocitrate dehydrogenase (NAD+)
sdhB	succinate dehydrogenase / fumarate reductase	iron-sulfur subunit [EC:1.3.5.1
DLAT	pyruvate dehydrogenase E2 component (dihydrolipoamide acetyltransferase)
Folate biosynthesis
SPR	sepiapterin reductase
SE	pyrimidodiazepine synthase
phhA	phenylalanine-4-hydroxylase
Purine metabolism
E2.1.2.2	phosphoribosylglycinamide formyltransferase
hprT	hypoxanthine phosphoribosyltransferase
cysC	adenylylsulfate kinase
Phenylalanine	tyrosine and tryptophan biosynthesis
tyrC	cyclohexadieny/prephenate dehydrogenase [EC:1.3.1.43
pdh	phenylalanine dehydrogenase
phhA	phenylalanine-4-hydroxylase
Amino sugar and nucleotide sugar metabolism
E2.4.2.24	1	4-beta-D-xylan synthase
murA	UDP-N-acetylglucosamine 1-carboxyvinyltransferase
neuA	N-acylneuraminate cytidylyltransferase
Methane metabolism
cdhB	acetyl-CoA decarbonylase/synthase complex subunit
methyl coenzyme M reductase
glyA	glycine hydroxymethyltransferase
Steroid hormone biosynthesis
HSD11B2	corticosteroid 11-beta-dehydrogenase isozyme 2
CYP21A	steroid 21-monooxygenase
Endocytosis
GRK1_7	rhodopsin kinase
ADRBK	beta-adrenergic-receptor kinase
Phenylalanine metabolism
pdh	phenylalanine dehydrogenase
phhA	phenylalanine-4-hydroxylase
Sulfur metabolism
cysE	serine O-acetyltransferase
cysC	adenylylsulfate kinase
Arginine biosynthesis
gudB	glutamate dehydrogenase
argJ	glutamate N-acetyltransferase / amino-acid N-acetyltransferase [EC:2.3.1.35
Chemokine signaling pathway
GRK1_7	rhodopsin kinase
ADRBK	beta-adrenergic-receptor kinase
TGF-beta signaling pathway
NOG
DCN
Pyruvate metabolism
E1.1.1.82	malate dehydrogenase (NADP+)
DLAT	pyruvate dehydrogenase E2 component (dihydrolipoamide acetyltransferase)
Porphyrin and chlorophyll metabolism
hemG	menaquinone-dependent protoporphyrinogen oxidase
HMOX1	heme oxygenase 1
One carbon pool by folate
glyA	glycine hydroxymethyltransferase
E2.1.2.2	phosphoribosylglycinamide formyltransferase
Glycine	serine and threonine metabolism
betB	betaine-aldehyde dehydrogenase
glyA	glycine hydroxymethyltransferase
Mucin type O-glycan biosynthesis
GALNT	polypeptide N-acetylgalactosaminyltransferase
SIAT4A	beta-galactoside alpha-2	3-sialyltransferase (sialyltransferase 4A)
Valine	leucine and isoleucine biosynthesis
leuB	3-isopropylmalate dehydrogenase
ilvC	ketol-acid reductoisomerase
Lysine degradation
LYS1	saccharopine dehydrogenase (NAD+	L-lysine forming)
PLOD1	procollagen-lysine	2-oxoglutarate 5-dioxygenase 1
Glycerophospholipid metabolism
PLMT	phosphatidyl-N-methylethanolamine N-methyltransferase
ATS1	glycerol-3-phosphate O-acyltransferase
Drug metabolism - other enzymes
hprT	hypoxanthine phosphoribosyltransferase
Glycerolipid metabolism
ATS1	glycerol-3-phosphate O-acyltransferase
Fructose and mannose metabolism
E2.7.1.105	6-phosphofructo-2-kinase
Carbon fixation pathways in prokaryotes
sdhB	succinate dehydrogenase / fumarate reductase	iron-sulfur subunit [EC:1.3.5.1
Taurine and hypotaurine metabolism
gudB	glutamate dehydrogenase
Glycosphingolipid biosynthesis - ganglio series
SIAT4A	beta-galactoside alpha-2	3-sialyltransferase (sialyltransferase 4A)
Pyrimidine metabolism
DHODH	dihydroorotate dehydrogenase
Naphthalene degradation
E1.14.13.1	salicylate hydroxylase
Pantothenate and CoA biosynthesis
ilvC	ketol-acid reductoisomerase
Morphine addiction
ADRBK	beta-adrenergic-receptor kinase
Starch and sucrose metabolism
GYG1	glycogenin
Ubiquinone and other terpenoid-quinone biosynthesis
COQ3	polyprenyldihydroxybenzoate methyltransferase / 3-demethylubiquinol 3-O-methyltransferase [EC:2.1.1.114
Pentose and glucuronate interconversions
uxuB	fructuronate reductase
HIF-1 signaling pathway
HMOX1	heme oxygenase 1
Phototransduction
GRK1_7	rhodopsin kinase
Glycosphingolipid biosynthesis - globo and isoglobo series
SIAT4A	beta-galactoside alpha-2	3-sialyltransferase (sialyltransferase 4A)
Glycosaminoglycan biosynthesis - keratan sulfate
SIAT4A	beta-galactoside alpha-2	3-sialyltransferase (sialyltransferase 4A)
Cyanoamino acid metabolism
glyA	glycine hydroxymethyltransferase
Carbon fixation in photosynthetic organisms
E1.1.1.82	malate dehydrogenase (NADP+)
Pathways in cancer
HMOX1	heme oxygenase 1
Glyoxylate and dicarboxylate metabolism
glyA	glycine hydroxymethyltransferase
Sphingolipid metabolism
UGCG	ceramide glucosyltransferase
Antifolate resistance
glyA	glycine hydroxymethyltransferase
C5-Branched dibasic acid metabolism
leuB	3-isopropylmalate dehydrogenase
Polycyclic aromatic hydrocarbon degradation
E1.14.13.1	salicylate hydroxylase
Hedgehog signaling pathway
ADRBK	beta-adrenergic-receptor kinase
Degradation of aromatic compounds
E1.14.13.1	salicylate hydroxylase
Dioxin degradation
E1.14.13.1	salicylate hydroxylase
Nitrogen metabolism
gudB	glutamate dehydrogenase
Tyrosine metabolism
pdh	phenylalanine dehydrogenase
RNA degradation
pcnB	poly(A) polymerase
Aldosterone-regulated sodium reabsorption
HSD11B2	corticosteroid 11-beta-dehydrogenase isozyme 2
Valine	leucine and isoleucine degradation
mmsB	3-hydroxyisobutyrate dehydrogenase
MicroRNAs in cancer
HMOX1	heme oxygenase 1
Glycolysis / Gluconeogenesis
DLAT	pyruvate dehydrogenase E2 component (dihydrolipoamide acetyltransferase)
Peptidoglycan biosynthesis
murA	UDP-N-acetylglucosamine 1-carboxyvinyltransferase
Lysine biosynthesis
LYS1	saccharopine dehydrogenase (NAD+	L-lysine forming)
Biofilm formation - Vibrio cholerae
cysE	serine O-acetyltransferase
Novobiocin biosynthesis
tyrC	cyclohexadieny/prephenate dehydrogenase [EC:1.3.1.43
Glutathione metabolism
SE	pyrimidodiazepine synthase
Cushing syndrome
CYP21A	steroid 21-monooxygenase
Aldosterone synthesis and secretion
CYP21A	steroid 21-monooxygenase
Olfactory transduction
ADRBK	beta-adrenergic-receptor kinase
Sesquiterpenoid and triterpenoid biosynthesis
SQLE	squalene monooxygenase
Tryptophan metabolism
INMT	methyltransferase [EC:2.1.1.49
Butanoate metabolism
sdhB	succinate dehydrogenase / fumarate reductase	iron-sulfur subunit [EC:1.3.5.1
Selenocompound metabolism
INMT	methyltransferase [EC:2.1.1.49
Mineral absorption
HMOX1	heme oxygenase 1
Cortisol synthesis and secretion
CYP21A	steroid 21-monooxygenase
Phototransduction - fly
ADRBK	beta-adrenergic-receptor kinase
Alanine	aspartate and glutamate metabolism
gudB	glutamate dehydrogenase
Ferroptosis
HMOX1	heme oxygenase 1
Streptomycin biosynthesis
iolG	myo-inositol 2-dehydrogenase / D-chiro-inositol 1-dehydrogenase [EC:1.1.1.18
Phenylpropanoid biosynthesis
E1.11.1.7	peroxidase
Inositol phosphate metabolism
iolG	myo-inositol 2-dehydrogenase / D-chiro-inositol 1-dehydrogenase [EC:1.1.1.18
Steroid biosynthesis
SQLE	squalene monooxygenase
Glutamatergic synapse
ADRBK	beta-adrenergic-receptor kinase
Fluid shear stress and atherosclerosis
HMOX1	heme oxygenase 1
Hepatocellular carcinoma
HMOX1	heme oxygenase 1
Neuroactive ligand-receptor interaction
HRH3	histamine receptor
Cysteine and methionine metabolism
cysE	serine O-acetyltransferase
Proteoglycans in cancer
DCN
Alcoholism
CAMKK1	calcium/calmodulin-dependent protein kinase kinase 1

## Sheet: j)
Metabolic pathways
iolG	myo-inositol 2-dehydrogenase / D-chiro-inositol 1-dehydrogenase [EC:1.1.1.18
IDH3	isocitrate dehydrogenase (NAD+)
uxuB	fructuronate reductase
E1.1.1.82	malate dehydrogenase (NADP+)
tyrC	cyclohexadieny/prephenate dehydrogenase [EC:1.3.1.43
hemG	menaquinone-dependent protoporphyrinogen oxidase
DHODH	dihydroorotate dehydrogenase
gudB	glutamate dehydrogenase
pdh	phenylalanine dehydrogenase
nuoA	NADH-quinone oxidoreductase subunit A
nuoK	NADH-quinone oxidoreductase subunit K
methyl coenzyme M reductase
E1.11.1.7	peroxidase
E1.14.13.1	salicylate hydroxylase
phhA	phenylalanine-4-hydroxylase
HMOX1	heme oxygenase 1
SQLE	squalene monooxygenase
CYP21A	steroid 21-monooxygenase
anfG	nitrogenase delta subunit
PLMT	phosphatidyl-N-methylethanolamine N-methyltransferase
COQ3	polyprenyldihydroxybenzoate methyltransferase / 3-demethylubiquinol 3-O-methyltransferase [EC:2.1.1.114
glyA	glycine hydroxymethyltransferase
argJ	glutamate N-acetyltransferase / amino-acid N-acetyltransferase [EC:2.3.1.35
DLAT	pyruvate dehydrogenase E2 component (dihydrolipoamide acetyltransferase)
ATS1	glycerol-3-phosphate O-acyltransferase
GALNT	polypeptide N-acetylgalactosaminyltransferase
UGCG	ceramide glucosyltransferase
GYG1	glycogenin
E2.4.2.24	1	4-beta-D-xylan synthase
SIAT4A	beta-galactoside alpha-2	3-sialyltransferase (sialyltransferase 4A)
murA	UDP-N-acetylglucosamine 1-carboxyvinyltransferase
cysC	adenylylsulfate kinase
ndk	nucleoside-diphosphate kinase
neuA	N-acylneuraminate cytidylyltransferase
Biosynthesis of secondary metabolites
IDH3	isocitrate dehydrogenase (NAD+)
tyrC	cyclohexadieny/prephenate dehydrogenase [EC:1.3.1.43
hemG	menaquinone-dependent protoporphyrinogen oxidase
pdh	phenylalanine dehydrogenase
E1.11.1.7	peroxidase
HMOX1	heme oxygenase 1
SQLE	squalene monooxygenase
PLMT	phosphatidyl-N-methylethanolamine N-methyltransferase
COQ3	polyprenyldihydroxybenzoate methyltransferase / 3-demethylubiquinol 3-O-methyltransferase [EC:2.1.1.114
glyA	glycine hydroxymethyltransferase
argJ	glutamate N-acetyltransferase / amino-acid N-acetyltransferase [EC:2.3.1.35
DLAT	pyruvate dehydrogenase E2 component (dihydrolipoamide acetyltransferase)
ATS1	glycerol-3-phosphate O-acyltransferase
ndk	nucleoside-diphosphate kinase
Microbial metabolism in diverse environments
iolG	myo-inositol 2-dehydrogenase / D-chiro-inositol 1-dehydrogenase [EC:1.1.1.18
IDH3	isocitrate dehydrogenase (NAD+)
E1.1.1.82	malate dehydrogenase (NADP+)
cdhB	acetyl-CoA decarbonylase/synthase complex subunit
gudB	glutamate dehydrogenase
methyl coenzyme M reductase
E1.14.13.1	salicylate hydroxylase
anfG	nitrogenase delta subunit
glyA	glycine hydroxymethyltransferase
DLAT	pyruvate dehydrogenase E2 component (dihydrolipoamide acetyltransferase)
cysC	adenylylsulfate kinase
Biosynthesis of antibiotics
iolG	myo-inositol 2-dehydrogenase / D-chiro-inositol 1-dehydrogenase [EC:1.1.1.18
IDH3	isocitrate dehydrogenase (NAD+)
pdh	phenylalanine dehydrogenase
SQLE	squalene monooxygenase
glyA	glycine hydroxymethyltransferase
argJ	glutamate N-acetyltransferase / amino-acid N-acetyltransferase [EC:2.3.1.35
DLAT	pyruvate dehydrogenase E2 component (dihydrolipoamide acetyltransferase)
ndk	nucleoside-diphosphate kinase
Biosynthesis of amino acids
IDH3	isocitrate dehydrogenase (NAD+)
tyrC	cyclohexadieny/prephenate dehydrogenase [EC:1.3.1.43
phhA	phenylalanine-4-hydroxylase
glyA	glycine hydroxymethyltransferase
argJ	glutamate N-acetyltransferase / amino-acid N-acetyltransferase [EC:2.3.1.35
Carbon metabolism
IDH3	isocitrate dehydrogenase (NAD+)
E1.1.1.82	malate dehydrogenase (NADP+)
cdhB	acetyl-CoA decarbonylase/synthase complex subunit
glyA	glycine hydroxymethyltransferase
DLAT	pyruvate dehydrogenase E2 component (dihydrolipoamide acetyltransferase)
Amino sugar and nucleotide sugar metabolism
E2.4.2.24	1	4-beta-D-xylan synthase
murA	UDP-N-acetylglucosamine 1-carboxyvinyltransferase
neuA	N-acylneuraminate cytidylyltransferase
Glycerophospholipid metabolism
PLMT	phosphatidyl-N-methylethanolamine N-methyltransferase
ATS1	glycerol-3-phosphate O-acyltransferase
tagD	glycerol-3-phosphate cytidylyltransferase
Methane metabolism
cdhB	acetyl-CoA decarbonylase/synthase complex subunit
methyl coenzyme M reductase
glyA	glycine hydroxymethyltransferase
Phenylalanine	tyrosine and tryptophan biosynthesis
tyrC	cyclohexadieny/prephenate dehydrogenase [EC:1.3.1.43
pdh	phenylalanine dehydrogenase
phhA	phenylalanine-4-hydroxylase
Phenylalanine metabolism
pdh	phenylalanine dehydrogenase
phhA	phenylalanine-4-hydroxylase
Porphyrin and chlorophyll metabolism
hemG	menaquinone-dependent protoporphyrinogen oxidase
HMOX1	heme oxygenase 1
Pyrimidine metabolism
DHODH	dihydroorotate dehydrogenase
ndk	nucleoside-diphosphate kinase
Nitrogen metabolism
gudB	glutamate dehydrogenase
anfG	nitrogenase delta subunit
Citrate cycle (TCA cycle)
IDH3	isocitrate dehydrogenase (NAD+)
DLAT	pyruvate dehydrogenase E2 component (dihydrolipoamide acetyltransferase)
Mucin type O-glycan biosynthesis
GALNT	polypeptide N-acetylgalactosaminyltransferase
SIAT4A	beta-galactoside alpha-2	3-sialyltransferase (sialyltransferase 4A)
Oxidative phosphorylation
nuoA	NADH-quinone oxidoreductase subunit A
nuoK	NADH-quinone oxidoreductase subunit K
Arginine biosynthesis
gudB	glutamate dehydrogenase
argJ	glutamate N-acetyltransferase / amino-acid N-acetyltransferase [EC:2.3.1.35
2-Oxocarboxylic acid metabolism
IDH3	isocitrate dehydrogenase (NAD+)
argJ	glutamate N-acetyltransferase / amino-acid N-acetyltransferase [EC:2.3.1.35
Steroid hormone biosynthesis
HSD11B2	corticosteroid 11-beta-dehydrogenase isozyme 2
CYP21A	steroid 21-monooxygenase
Purine metabolism
cysC	adenylylsulfate kinase
ndk	nucleoside-diphosphate kinase
Pyruvate metabolism
E1.1.1.82	malate dehydrogenase (NADP+)
DLAT	pyruvate dehydrogenase E2 component (dihydrolipoamide acetyltransferase)
Folate biosynthesis
SE	pyrimidodiazepine synthase
phhA	phenylalanine-4-hydroxylase
Chloroalkane and chloroalkene degradation
anfG	nitrogenase delta subunit
Polycyclic aromatic hydrocarbon degradation
E1.14.13.1	salicylate hydroxylase
Inositol phosphate metabolism
iolG	myo-inositol 2-dehydrogenase / D-chiro-inositol 1-dehydrogenase [EC:1.1.1.18
Morphine addiction
ADRBK	beta-adrenergic-receptor kinase
Ubiquinone and other terpenoid-quinone biosynthesis
COQ3	polyprenyldihydroxybenzoate methyltransferase / 3-demethylubiquinol 3-O-methyltransferase [EC:2.1.1.114
Taurine and hypotaurine metabolism
gudB	glutamate dehydrogenase
Pentose and glucuronate interconversions
uxuB	fructuronate reductase
Cortisol synthesis and secretion
CYP21A	steroid 21-monooxygenase
Pathways in cancer
HMOX1	heme oxygenase 1
Antifolate resistance
glyA	glycine hydroxymethyltransferase
Cyanoamino acid metabolism
glyA	glycine hydroxymethyltransferase
Cushing syndrome
CYP21A	steroid 21-monooxygenase
Endocytosis
ADRBK	beta-adrenergic-receptor kinase
Novobiocin biosynthesis
tyrC	cyclohexadieny/prephenate dehydrogenase [EC:1.3.1.43
Fluid shear stress and atherosclerosis
HMOX1	heme oxygenase 1
Sphingolipid metabolism
UGCG	ceramide glucosyltransferase
HIF-1 signaling pathway
HMOX1	heme oxygenase 1
Ferroptosis
HMOX1	heme oxygenase 1
Phenylpropanoid biosynthesis
E1.11.1.7	peroxidase
Starch and sucrose metabolism
GYG1	glycogenin
Selenocompound metabolism
INMT	methyltransferase [EC:2.1.1.49
Aldosterone-regulated sodium reabsorption
HSD11B2	corticosteroid 11-beta-dehydrogenase isozyme 2
Tryptophan metabolism
INMT	methyltransferase [EC:2.1.1.49
Glycosphingolipid biosynthesis - globo and isoglobo series
SIAT4A	beta-galactoside alpha-2	3-sialyltransferase (sialyltransferase 4A)
Alanine	aspartate and glutamate metabolism
gudB	glutamate dehydrogenase
Neuroactive ligand-receptor interaction
HRH3	histamine receptor
Peptidoglycan biosynthesis
murA	UDP-N-acetylglucosamine 1-carboxyvinyltransferase
Sulfur metabolism
cysC	adenylylsulfate kinase
Glutamatergic synapse
ADRBK	beta-adrenergic-receptor kinase
Glycosaminoglycan biosynthesis - keratan sulfate
SIAT4A	beta-galactoside alpha-2	3-sialyltransferase (sialyltransferase 4A)
Aldosterone synthesis and secretion
CYP21A	steroid 21-monooxygenase
Olfactory transduction
ADRBK	beta-adrenergic-receptor kinase
Glycosphingolipid biosynthesis - ganglio series
SIAT4A	beta-galactoside alpha-2	3-sialyltransferase (sialyltransferase 4A)
One carbon pool by folate
glyA	glycine hydroxymethyltransferase
Glycine	serine and threonine metabolism
glyA	glycine hydroxymethyltransferase
Carbon fixation in photosynthetic organisms
E1.1.1.82	malate dehydrogenase (NADP+)
Tyrosine metabolism
pdh	phenylalanine dehydrogenase
Sesquiterpenoid and triterpenoid biosynthesis
SQLE	squalene monooxygenase
Degradation of aromatic compounds
E1.14.13.1	salicylate hydroxylase
MAPK signaling pathway - plant
ndk	nucleoside-diphosphate kinase
Glyoxylate and dicarboxylate metabolism
glyA	glycine hydroxymethyltransferase
Hepatocellular carcinoma
HMOX1	heme oxygenase 1
Lysine degradation
PLOD1	procollagen-lysine	2-oxoglutarate 5-dioxygenase 1
Drug metabolism - other enzymes
ndk	nucleoside-diphosphate kinase
Dioxin degradation
E1.14.13.1	salicylate hydroxylase
Glycerolipid metabolism
ATS1	glycerol-3-phosphate O-acyltransferase
Steroid biosynthesis
SQLE	squalene monooxygenase
RNA degradation
pcnB	poly(A) polymerase
MicroRNAs in cancer
HMOX1	heme oxygenase 1
Chemokine signaling pathway
ADRBK	beta-adrenergic-receptor kinase
TGF-beta signaling pathway
NOG
Glutathione metabolism
SE	pyrimidodiazepine synthase
Streptomycin biosynthesis
iolG	myo-inositol 2-dehydrogenase / D-chiro-inositol 1-dehydrogenase [EC:1.1.1.18
Hedgehog signaling pathway
ADRBK	beta-adrenergic-receptor kinase
Fructose and mannose metabolism
E2.7.1.105	6-phosphofructo-2-kinase
Glycolysis / Gluconeogenesis
DLAT	pyruvate dehydrogenase E2 component (dihydrolipoamide acetyltransferase)
Naphthalene degradation
E1.14.13.1	salicylate hydroxylase
Mineral absorption
HMOX1	heme oxygenase 1
Phototransduction - fly
ADRBK	beta-adrenergic-receptor kinase

[truncated: 2 more sheets: k), l)]
