# Supplementary material for: Immune challenge reduces gut microbial diversity and triggers fertility-dependent gene expression changes in a social insect
Source: BMC Genomics. 2020 Nov 23;21:816. doi: 10.1186/s12864-020-07191-9 (PMC7682046; doi:10.1186/s12864-020-07191-9)
Supplement: Supplementary file 1 — Additional file 1. Additional methodological details, Figures S1 and S2 and Table S2. Description of additional supplementary tables (Tables S1, S3-S18) are also provided. [file 12864_2020_7191_MOESM1_ESM.zip › Table_S5.xlsx]

## Sheet: a)
Metabolic pathways
iolG	myo-inositol 2-dehydrogenase / D-chiro-inositol 1-dehydrogenase [EC:1.1.1.18
uxuB	fructuronate reductase
E1.1.1.82	malate dehydrogenase (NADP+)
tyrC	cyclohexadieny/prephenate dehydrogenase [EC:1.3.1.43
hemG	menaquinone-dependent protoporphyrinogen oxidase
sdhB	succinate dehydrogenase / fumarate reductase, iron-sulfur subunit [EC:1.3.5.1
DHODH	dihydroorotate dehydrogenase
pdh	phenylalanine dehydrogenase
LYS1	saccharopine dehydrogenase (NAD+, L-lysine forming)
nuoA	NADH-quinone oxidoreductase subunit A
nuoC	NADH-quinone oxidoreductase subunit C
cysJ	sulfite reductase (NADPH) flavoprotein alpha-component
methyl coenzyme M reductase
mcrB	methyl-coenzyme M reductase beta subunit
E1.11.1.7	peroxidase
E1.13.11.4	gentisate 1,2-dioxygenase
E1.14.13.1	salicylate hydroxylase
phhA	phenylalanine-4-hydroxylase
HMOX1	heme oxygenase 1
SQLE	squalene monooxygenase
CYP21A	steroid 21-monooxygenase
anfG	nitrogenase delta subunit
glyA	glycine hydroxymethyltransferase
argJ	glutamate N-acetyltransferase / amino-acid N-acetyltransferase [EC:2.3.1.35
ATS1	glycerol-3-phosphate O-acyltransferase
GALNT	polypeptide N-acetylgalactosaminyltransferase
UGCG	ceramide glucosyltransferase
OST4	oligosaccharyl transferase complex subunit
GYG1	glycogenin
hprT	hypoxanthine phosphoribosyltransferase
murA	UDP-N-acetylglucosamine 1-carboxyvinyltransferase
cysC	adenylylsulfate kinase
neuA	N-acylneuraminate cytidylyltransferase
Microbial metabolism in diverse environments
iolG	myo-inositol 2-dehydrogenase / D-chiro-inositol 1-dehydrogenase [EC:1.1.1.18
E1.1.1.82	malate dehydrogenase (NADP+)
cdhB	acetyl-CoA decarbonylase/synthase complex subunit
sdhB	succinate dehydrogenase / fumarate reductase, iron-sulfur subunit [EC:1.3.5.1
cysJ	sulfite reductase (NADPH) flavoprotein alpha-component
methyl coenzyme M reductase
mcrB	methyl-coenzyme M reductase beta subunit
E1.13.11.4	gentisate 1,2-dioxygenase
E1.14.13.1	salicylate hydroxylase
anfG	nitrogenase delta subunit
glyA	glycine hydroxymethyltransferase
cysC	adenylylsulfate kinase
Biosynthesis of secondary metabolites
tyrC	cyclohexadieny/prephenate dehydrogenase [EC:1.3.1.43
hemG	menaquinone-dependent protoporphyrinogen oxidase
sdhB	succinate dehydrogenase / fumarate reductase, iron-sulfur subunit [EC:1.3.5.1
pdh	phenylalanine dehydrogenase
LYS1	saccharopine dehydrogenase (NAD+, L-lysine forming)
E1.11.1.7	peroxidase
HMOX1	heme oxygenase 1
SQLE	squalene monooxygenase
glyA	glycine hydroxymethyltransferase
argJ	glutamate N-acetyltransferase / amino-acid N-acetyltransferase [EC:2.3.1.35
ATS1	glycerol-3-phosphate O-acyltransferase
hprT	hypoxanthine phosphoribosyltransferase
Biosynthesis of antibiotics
iolG	myo-inositol 2-dehydrogenase / D-chiro-inositol 1-dehydrogenase [EC:1.1.1.18
sdhB	succinate dehydrogenase / fumarate reductase, iron-sulfur subunit [EC:1.3.5.1
pdh	phenylalanine dehydrogenase
LYS1	saccharopine dehydrogenase (NAD+, L-lysine forming)
SQLE	squalene monooxygenase
glyA	glycine hydroxymethyltransferase
argJ	glutamate N-acetyltransferase / amino-acid N-acetyltransferase [EC:2.3.1.35
Carbon metabolism
E1.1.1.82	malate dehydrogenase (NADP+)
cdhB	acetyl-CoA decarbonylase/synthase complex subunit
sdhB	succinate dehydrogenase / fumarate reductase, iron-sulfur subunit [EC:1.3.5.1
mcrB	methyl-coenzyme M reductase beta subunit
glyA	glycine hydroxymethyltransferase
Biosynthesis of amino acids
tyrC	cyclohexadieny/prephenate dehydrogenase [EC:1.3.1.43
LYS1	saccharopine dehydrogenase (NAD+, L-lysine forming)
phhA	phenylalanine-4-hydroxylase
glyA	glycine hydroxymethyltransferase
argJ	glutamate N-acetyltransferase / amino-acid N-acetyltransferase [EC:2.3.1.35
Methane metabolism
cdhB	acetyl-CoA decarbonylase/synthase complex subunit
methyl coenzyme M reductase
mcrB	methyl-coenzyme M reductase beta subunit
glyA	glycine hydroxymethyltransferase
Phenylalanine, tyrosine and tryptophan biosynthesis
tyrC	cyclohexadieny/prephenate dehydrogenase [EC:1.3.1.43
pdh	phenylalanine dehydrogenase
phhA	phenylalanine-4-hydroxylase
Oxidative phosphorylation
sdhB	succinate dehydrogenase / fumarate reductase, iron-sulfur subunit [EC:1.3.5.1
nuoA	NADH-quinone oxidoreductase subunit A
nuoC	NADH-quinone oxidoreductase subunit C
Phenylalanine metabolism
pdh	phenylalanine dehydrogenase
phhA	phenylalanine-4-hydroxylase
Sulfur metabolism
cysJ	sulfite reductase (NADPH) flavoprotein alpha-component
cysC	adenylylsulfate kinase
Folate biosynthesis
SE	pyrimidodiazepine synthase
phhA	phenylalanine-4-hydroxylase
Lysine degradation
LYS1	saccharopine dehydrogenase (NAD+, L-lysine forming)
PLOD1	procollagen-lysine,2-oxoglutarate 5-dioxygenase 1
Porphyrin and chlorophyll metabolism
hemG	menaquinone-dependent protoporphyrinogen oxidase
HMOX1	heme oxygenase 1
Amino sugar and nucleotide sugar metabolism
murA	UDP-N-acetylglucosamine 1-carboxyvinyltransferase
neuA	N-acylneuraminate cytidylyltransferase
Tyrosine metabolism
pdh	phenylalanine dehydrogenase
E1.13.11.4	gentisate 1,2-dioxygenase
Purine metabolism
hprT	hypoxanthine phosphoribosyltransferase
cysC	adenylylsulfate kinase
Neuroactive ligand-receptor interaction
HRH2	histamine receptor
HRH3	histamine receptor
2-Oxocarboxylic acid metabolism
argJ	glutamate N-acetyltransferase / amino-acid N-acetyltransferase [EC:2.3.1.35
Mucin type O-glycan biosynthesis
GALNT	polypeptide N-acetylgalactosaminyltransferase
Glyoxylate and dicarboxylate metabolism
glyA	glycine hydroxymethyltransferase
Degradation of aromatic compounds
E1.14.13.1	salicylate hydroxylase
HIF-1 signaling pathway
HMOX1	heme oxygenase 1
Cyanoamino acid metabolism
glyA	glycine hydroxymethyltransferase
Chloroalkane and chloroalkene degradation
anfG	nitrogenase delta subunit
Butanoate metabolism
sdhB	succinate dehydrogenase / fumarate reductase, iron-sulfur subunit [EC:1.3.5.1
Inositol phosphate metabolism
iolG	myo-inositol 2-dehydrogenase / D-chiro-inositol 1-dehydrogenase [EC:1.1.1.18
Glutathione metabolism
SE	pyrimidodiazepine synthase
Protein processing in endoplasmic reticulum
OST4	oligosaccharyl transferase complex subunit
Carbon fixation pathways in prokaryotes
sdhB	succinate dehydrogenase / fumarate reductase, iron-sulfur subunit [EC:1.3.5.1
Polycyclic aromatic hydrocarbon degradation
E1.14.13.1	salicylate hydroxylase
Phototransduction - fly
ADRBK	beta-adrenergic-receptor kinase
Naphthalene degradation
E1.14.13.1	salicylate hydroxylase
Nitrogen metabolism
anfG	nitrogenase delta subunit
Pentose and glucuronate interconversions
uxuB	fructuronate reductase
Phenylpropanoid biosynthesis
E1.11.1.7	peroxidase
Calcium signaling pathway
HRH2	histamine receptor
Glycerophospholipid metabolism
ATS1	glycerol-3-phosphate O-acyltransferase
Citrate cycle (TCA cycle)
sdhB	succinate dehydrogenase / fumarate reductase, iron-sulfur subunit [EC:1.3.5.1
Antifolate resistance
glyA	glycine hydroxymethyltransferase
Tryptophan metabolism
INMT	methyltransferase [EC:2.1.1.49
Arginine biosynthesis
argJ	glutamate N-acetyltransferase / amino-acid N-acetyltransferase [EC:2.3.1.35
N-Glycan biosynthesis
OST4	oligosaccharyl transferase complex subunit
Carbon fixation in photosynthetic organisms
E1.1.1.82	malate dehydrogenase (NADP+)
Morphine addiction
ADRBK	beta-adrenergic-receptor kinase
Mineral absorption
HMOX1	heme oxygenase 1
Cortisol synthesis and secretion
CYP21A	steroid 21-monooxygenase
Ferroptosis
HMOX1	heme oxygenase 1
Novobiocin biosynthesis
tyrC	cyclohexadieny/prephenate dehydrogenase [EC:1.3.1.43
Streptomycin biosynthesis
iolG	myo-inositol 2-dehydrogenase / D-chiro-inositol 1-dehydrogenase [EC:1.1.1.18
Glycine, serine and threonine metabolism
glyA	glycine hydroxymethyltransferase
Pathways in cancer
HMOX1	heme oxygenase 1
Hedgehog signaling pathway
ADRBK	beta-adrenergic-receptor kinase
Dioxin degradation
E1.14.13.1	salicylate hydroxylase
Cushing syndrome
CYP21A	steroid 21-monooxygenase
One carbon pool by folate
glyA	glycine hydroxymethyltransferase
Olfactory transduction
ADRBK	beta-adrenergic-receptor kinase
Chemokine signaling pathway
ADRBK	beta-adrenergic-receptor kinase
Various types of N-glycan biosynthesis
OST4	oligosaccharyl transferase complex subunit
Steroid biosynthesis
SQLE	squalene monooxygenase
Drug metabolism - other enzymes
hprT	hypoxanthine phosphoribosyltransferase
RNA degradation
pcnB	poly(A) polymerase
Glycerolipid metabolism
ATS1	glycerol-3-phosphate O-acyltransferase
Sesquiterpenoid and triterpenoid biosynthesis
SQLE	squalene monooxygenase
MicroRNAs in cancer
HMOX1	heme oxygenase 1
Pyrimidine metabolism
DHODH	dihydroorotate dehydrogenase
Gastric acid secretion
HRH2	histamine receptor
Aldosterone synthesis and secretion
CYP21A	steroid 21-monooxygenase
Lysine biosynthesis
LYS1	saccharopine dehydrogenase (NAD+, L-lysine forming)
Steroid hormone biosynthesis
CYP21A	steroid 21-monooxygenase
Hepatocellular carcinoma
HMOX1	heme oxygenase 1
Glutamatergic synapse
ADRBK	beta-adrenergic-receptor kinase
Endocytosis
ADRBK	beta-adrenergic-receptor kinase
Peptidoglycan biosynthesis
murA	UDP-N-acetylglucosamine 1-carboxyvinyltransferase
Fluid shear stress and atherosclerosis
HMOX1	heme oxygenase 1
Pyruvate metabolism
E1.1.1.82	malate dehydrogenase (NADP+)
TGF-beta signaling pathway
NOG
Sphingolipid metabolism
UGCG	ceramide glucosyltransferase
Starch and sucrose metabolism
GYG1	glycogenin
Selenocompound metabolism
INMT	methyltransferase [EC:2.1.1.49

## Sheet: b)
Metabolic pathways
iolG	myo-inositol 2-dehydrogenase / D-chiro-inositol 1-dehydrogenase [EC:1.1.1.18
mmsB	3-hydroxyisobutyrate dehydrogenase
IDH3	isocitrate dehydrogenase (NAD+)
uxuB	fructuronate reductase
E1.1.1.82	malate dehydrogenase (NADP+)
leuB	3-isopropylmalate dehydrogenase
ilvC	ketol-acid reductoisomerase
SPR	sepiapterin reductase
betB	betaine-aldehyde dehydrogenase
tyrC	cyclohexadieny/prephenate dehydrogenase [EC:1.3.1.43
hemG	menaquinone-dependent protoporphyrinogen oxidase
E1.3.3.6	acyl-CoA oxidase
sdhB	succinate dehydrogenase / fumarate reductase, iron-sulfur subunit [EC:1.3.5.1
DHODH	dihydroorotate dehydrogenase
gudB	glutamate dehydrogenase
GLUD1_2	glutamate dehydrogenase (NAD(P)+)
pdh	phenylalanine dehydrogenase
GLDC	glycine dehydrogenase
LYS1	saccharopine dehydrogenase (NAD+, L-lysine forming)
nuoA	NADH-quinone oxidoreductase subunit A
nuoC	NADH-quinone oxidoreductase subunit C
nuoK	NADH-quinone oxidoreductase subunit K
cysJ	sulfite reductase (NADPH) flavoprotein alpha-component
methyl coenzyme M reductase
mcrB	methyl-coenzyme M reductase beta subunit
fbcH	ubiquinol-cytochrome c reductase cytochrome b/c1
E1.11.1.7	peroxidase
E1.13.11.4	gentisate 1,2-dioxygenase
E1.14.13.1	salicylate hydroxylase
phhA	phenylalanine-4-hydroxylase
HMOX1	heme oxygenase 1
SQLE	squalene monooxygenase
CYP21A	steroid 21-monooxygenase
anfG	nitrogenase delta subunit
PLMT	phosphatidyl-N-methylethanolamine N-methyltransferase
COQ3	polyprenyldihydroxybenzoate methyltransferase / 3-demethylubiquinol 3-O-methyltransferase [EC:2.1.1.114
glyA	glycine hydroxymethyltransferase
E2.1.2.2	phosphoribosylglycinamide formyltransferase
argJ	glutamate N-acetyltransferase / amino-acid N-acetyltransferase [EC:2.3.1.35
DLAT	pyruvate dehydrogenase E2 component (dihydrolipoamide acetyltransferase)
ATS1	glycerol-3-phosphate O-acyltransferase
cysE	serine O-acetyltransferase
E2.3.1.37	5-aminolevulinate synthase
GALNT	polypeptide N-acetylgalactosaminyltransferase
UGCG	ceramide glucosyltransferase
OST4	oligosaccharyl transferase complex subunit
GYG1	glycogenin
hprT	hypoxanthine phosphoribosyltransferase
E2.4.2.24	1,4-beta-D-xylan synthase
SIAT4A	beta-galactoside alpha-2,3-sialyltransferase (sialyltransferase 4A)
murA	UDP-N-acetylglucosamine 1-carboxyvinyltransferase
cysC	adenylylsulfate kinase
ndk	nucleoside-diphosphate kinase
neuA	N-acylneuraminate cytidylyltransferase
Biosynthesis of secondary metabolites
IDH3	isocitrate dehydrogenase (NAD+)
leuB	3-isopropylmalate dehydrogenase
ilvC	ketol-acid reductoisomerase
tyrC	cyclohexadieny/prephenate dehydrogenase [EC:1.3.1.43
hemG	menaquinone-dependent protoporphyrinogen oxidase
E1.3.3.6	acyl-CoA oxidase
sdhB	succinate dehydrogenase / fumarate reductase, iron-sulfur subunit [EC:1.3.5.1
pdh	phenylalanine dehydrogenase
GLDC	glycine dehydrogenase
LYS1	saccharopine dehydrogenase (NAD+, L-lysine forming)
E1.11.1.7	peroxidase
HMOX1	heme oxygenase 1
SQLE	squalene monooxygenase
PLMT	phosphatidyl-N-methylethanolamine N-methyltransferase
COQ3	polyprenyldihydroxybenzoate methyltransferase / 3-demethylubiquinol 3-O-methyltransferase [EC:2.1.1.114
glyA	glycine hydroxymethyltransferase
E2.1.2.2	phosphoribosylglycinamide formyltransferase
argJ	glutamate N-acetyltransferase / amino-acid N-acetyltransferase [EC:2.3.1.35
DLAT	pyruvate dehydrogenase E2 component (dihydrolipoamide acetyltransferase)
ATS1	glycerol-3-phosphate O-acyltransferase
cysE	serine O-acetyltransferase
E2.3.1.37	5-aminolevulinate synthase
hprT	hypoxanthine phosphoribosyltransferase
ndk	nucleoside-diphosphate kinase
Microbial metabolism in diverse environments
iolG	myo-inositol 2-dehydrogenase / D-chiro-inositol 1-dehydrogenase [EC:1.1.1.18
IDH3	isocitrate dehydrogenase (NAD+)
E1.1.1.82	malate dehydrogenase (NADP+)
allD	ureidoglycolate dehydrogenase (NAD+)
cdhB	acetyl-CoA decarbonylase/synthase complex subunit
sdhB	succinate dehydrogenase / fumarate reductase, iron-sulfur subunit [EC:1.3.5.1
gudB	glutamate dehydrogenase
GLUD1_2	glutamate dehydrogenase (NAD(P)+)
nasB	assimilatory nitrate reductase electron transfer subunit
cysJ	sulfite reductase (NADPH) flavoprotein alpha-component
methyl coenzyme M reductase
mcrB	methyl-coenzyme M reductase beta subunit
E1.13.11.4	gentisate 1,2-dioxygenase
E1.14.13.1	salicylate hydroxylase
anfG	nitrogenase delta subunit
glyA	glycine hydroxymethyltransferase
DLAT	pyruvate dehydrogenase E2 component (dihydrolipoamide acetyltransferase)
cysE	serine O-acetyltransferase
cysC	adenylylsulfate kinase
Biosynthesis of antibiotics
iolG	myo-inositol 2-dehydrogenase / D-chiro-inositol 1-dehydrogenase [EC:1.1.1.18
IDH3	isocitrate dehydrogenase (NAD+)
ilvC	ketol-acid reductoisomerase
sdhB	succinate dehydrogenase / fumarate reductase, iron-sulfur subunit [EC:1.3.5.1
pdh	phenylalanine dehydrogenase
GLDC	glycine dehydrogenase
LYS1	saccharopine dehydrogenase (NAD+, L-lysine forming)
SQLE	squalene monooxygenase
glyA	glycine hydroxymethyltransferase
E2.1.2.2	phosphoribosylglycinamide formyltransferase
argJ	glutamate N-acetyltransferase / amino-acid N-acetyltransferase [EC:2.3.1.35
DLAT	pyruvate dehydrogenase E2 component (dihydrolipoamide acetyltransferase)
ndk	nucleoside-diphosphate kinase
Carbon metabolism
IDH3	isocitrate dehydrogenase (NAD+)
E1.1.1.82	malate dehydrogenase (NADP+)
cdhB	acetyl-CoA decarbonylase/synthase complex subunit
sdhB	succinate dehydrogenase / fumarate reductase, iron-sulfur subunit [EC:1.3.5.1
GLUD1_2	glutamate dehydrogenase (NAD(P)+)
GLDC	glycine dehydrogenase
mcrB	methyl-coenzyme M reductase beta subunit
glyA	glycine hydroxymethyltransferase
DLAT	pyruvate dehydrogenase E2 component (dihydrolipoamide acetyltransferase)
cysE	serine O-acetyltransferase
Biosynthesis of amino acids
IDH3	isocitrate dehydrogenase (NAD+)
leuB	3-isopropylmalate dehydrogenase
ilvC	ketol-acid reductoisomerase
tyrC	cyclohexadieny/prephenate dehydrogenase [EC:1.3.1.43
LYS1	saccharopine dehydrogenase (NAD+, L-lysine forming)
phhA	phenylalanine-4-hydroxylase
glyA	glycine hydroxymethyltransferase
argJ	glutamate N-acetyltransferase / amino-acid N-acetyltransferase [EC:2.3.1.35
cysE	serine O-acetyltransferase
Purine metabolism
allD	ureidoglycolate dehydrogenase (NAD+)
E2.1.2.2	phosphoribosylglycinamide formyltransferase
hprT	hypoxanthine phosphoribosyltransferase
cysC	adenylylsulfate kinase
ndk	nucleoside-diphosphate kinase
Oxidative phosphorylation
sdhB	succinate dehydrogenase / fumarate reductase, iron-sulfur subunit [EC:1.3.5.1
nuoA	NADH-quinone oxidoreductase subunit A
nuoC	NADH-quinone oxidoreductase subunit C
nuoK	NADH-quinone oxidoreductase subunit K
fbcH	ubiquinol-cytochrome c reductase cytochrome b/c1
Glycerophospholipid metabolism
PLMT	phosphatidyl-N-methylethanolamine N-methyltransferase
CHAT	choline O-acetyltransferase
ATS1	glycerol-3-phosphate O-acyltransferase
tagD	glycerol-3-phosphate cytidylyltransferase
2-Oxocarboxylic acid metabolism
IDH3	isocitrate dehydrogenase (NAD+)
leuB	3-isopropylmalate dehydrogenase
ilvC	ketol-acid reductoisomerase
argJ	glutamate N-acetyltransferase / amino-acid N-acetyltransferase [EC:2.3.1.35
Methane metabolism
cdhB	acetyl-CoA decarbonylase/synthase complex subunit
methyl coenzyme M reductase
mcrB	methyl-coenzyme M reductase beta subunit
glyA	glycine hydroxymethyltransferase
Nitrogen metabolism
gudB	glutamate dehydrogenase
GLUD1_2	glutamate dehydrogenase (NAD(P)+)
nasB	assimilatory nitrate reductase electron transfer subunit
anfG	nitrogenase delta subunit
Glycine, serine and threonine metabolism
betB	betaine-aldehyde dehydrogenase
GLDC	glycine dehydrogenase
glyA	glycine hydroxymethyltransferase
E2.3.1.37	5-aminolevulinate synthase
Lysine degradation
LYS1	saccharopine dehydrogenase (NAD+, L-lysine forming)
E1.14.11.1	gamma-butyrobetaine dioxygenase
PLOD1	procollagen-lysine,2-oxoglutarate 5-dioxygenase 1
Porphyrin and chlorophyll metabolism
hemG	menaquinone-dependent protoporphyrinogen oxidase
HMOX1	heme oxygenase 1
E2.3.1.37	5-aminolevulinate synthase
Amino sugar and nucleotide sugar metabolism
E2.4.2.24	1,4-beta-D-xylan synthase
murA	UDP-N-acetylglucosamine 1-carboxyvinyltransferase
neuA	N-acylneuraminate cytidylyltransferase
Citrate cycle (TCA cycle)
IDH3	isocitrate dehydrogenase (NAD+)
sdhB	succinate dehydrogenase / fumarate reductase, iron-sulfur subunit [EC:1.3.5.1
DLAT	pyruvate dehydrogenase E2 component (dihydrolipoamide acetyltransferase)
Arginine biosynthesis
gudB	glutamate dehydrogenase
GLUD1_2	glutamate dehydrogenase (NAD(P)+)
argJ	glutamate N-acetyltransferase / amino-acid N-acetyltransferase [EC:2.3.1.35
Sulfur metabolism
cysJ	sulfite reductase (NADPH) flavoprotein alpha-component
cysE	serine O-acetyltransferase
cysC	adenylylsulfate kinase
Folate biosynthesis
SPR	sepiapterin reductase
SE	pyrimidodiazepine synthase
phhA	phenylalanine-4-hydroxylase
Phenylalanine, tyrosine and tryptophan biosynthesis
tyrC	cyclohexadieny/prephenate dehydrogenase [EC:1.3.1.43
pdh	phenylalanine dehydrogenase
phhA	phenylalanine-4-hydroxylase
Alanine, aspartate and glutamate metabolism
gudB	glutamate dehydrogenase
GLUD1_2	glutamate dehydrogenase (NAD(P)+)
Inositol phosphate metabolism
iolG	myo-inositol 2-dehydrogenase / D-chiro-inositol 1-dehydrogenase [EC:1.1.1.18
PIP4K2	1-phosphatidylinositol-5-phosphate 4-kinase
Drug metabolism - other enzymes
hprT	hypoxanthine phosphoribosyltransferase
ndk	nucleoside-diphosphate kinase
Phenylalanine metabolism
pdh	phenylalanine dehydrogenase
phhA	phenylalanine-4-hydroxylase
One carbon pool by folate
glyA	glycine hydroxymethyltransferase
E2.1.2.2	phosphoribosylglycinamide formyltransferase
Glyoxylate and dicarboxylate metabolism
GLDC	glycine dehydrogenase
glyA	glycine hydroxymethyltransferase
Chemokine signaling pathway
GRK1_7	rhodopsin kinase
ADRBK	beta-adrenergic-receptor kinase
TGF-beta signaling pathway
NOG
DCN
Pyrimidine metabolism
DHODH	dihydroorotate dehydrogenase
ndk	nucleoside-diphosphate kinase
Steroid hormone biosynthesis
HSD11B2	corticosteroid 11-beta-dehydrogenase isozyme 2
CYP21A	steroid 21-monooxygenase
Mucin type O-glycan biosynthesis
GALNT	polypeptide N-acetylgalactosaminyltransferase
SIAT4A	beta-galactoside alpha-2,3-sialyltransferase (sialyltransferase 4A)
Tyrosine metabolism
pdh	phenylalanine dehydrogenase
E1.13.11.4	gentisate 1,2-dioxygenase
Neuroactive ligand-receptor interaction
HRH2	histamine receptor
HRH3	histamine receptor
Endocytosis
GRK1_7	rhodopsin kinase
ADRBK	beta-adrenergic-receptor kinase
Pyruvate metabolism
E1.1.1.82	malate dehydrogenase (NADP+)
DLAT	pyruvate dehydrogenase E2 component (dihydrolipoamide acetyltransferase)
Valine, leucine and isoleucine biosynthesis
leuB	3-isopropylmalate dehydrogenase
ilvC	ketol-acid reductoisomerase
Regulation of actin cytoskeleton
PIP4K2	1-phosphatidylinositol-5-phosphate 4-kinase
Necroptosis
GLUD1_2	glutamate dehydrogenase (NAD(P)+)
Cysteine and methionine metabolism
cysE	serine O-acetyltransferase
Cholinergic synapse
CHAT	choline O-acetyltransferase
Glycosphingolipid biosynthesis - globo and isoglobo series
SIAT4A	beta-galactoside alpha-2,3-sialyltransferase (sialyltransferase 4A)
Dioxin degradation
E1.14.13.1	salicylate hydroxylase
C5-Branched dibasic acid metabolism
leuB	3-isopropylmalate dehydrogenase
Retinol metabolism
RDH5	11-cis-retinol dehydrogenase
Steroid biosynthesis
SQLE	squalene monooxygenase
Phototransduction
GRK1_7	rhodopsin kinase
Gastric acid secretion
HRH2	histamine receptor
Pentose and glucuronate interconversions
uxuB	fructuronate reductase
Peroxisome
E1.3.3.6	acyl-CoA oxidase
Polycyclic aromatic hydrocarbon degradation
E1.14.13.1	salicylate hydroxylase
PPAR signaling pathway
E1.3.3.6	acyl-CoA oxidase
Calcium signaling pathway
HRH2	histamine receptor
Aldosterone-regulated sodium reabsorption
HSD11B2	corticosteroid 11-beta-dehydrogenase isozyme 2
Sphingolipid metabolism
UGCG	ceramide glucosyltransferase
Selenocompound metabolism
INMT	methyltransferase [EC:2.1.1.49
Glycosphingolipid biosynthesis - ganglio series
SIAT4A	beta-galactoside alpha-2,3-sialyltransferase (sialyltransferase 4A)
Phosphatidylinositol signaling system
PIP4K2	1-phosphatidylinositol-5-phosphate 4-kinase
Fatty acid metabolism
E1.3.3.6	acyl-CoA oxidase
Ferroptosis
HMOX1	heme oxygenase 1
Hedgehog signaling pathway
ADRBK	beta-adrenergic-receptor kinase
Olfactory transduction
ADRBK	beta-adrenergic-receptor kinase
Aldosterone synthesis and secretion
CYP21A	steroid 21-monooxygenase
Glycolysis / Gluconeogenesis
DLAT	pyruvate dehydrogenase E2 component (dihydrolipoamide acetyltransferase)
Hepatocellular carcinoma
HMOX1	heme oxygenase 1
D-Glutamine and D-glutamate metabolism
GLUD1_2	glutamate dehydrogenase (NAD(P)+)
Biosynthesis of unsaturated fatty acids
E1.3.3.6	acyl-CoA oxidase
Starch and sucrose metabolism
GYG1	glycogenin
Degradation of aromatic compounds
E1.14.13.1	salicylate hydroxylase
Proteoglycans in cancer
DCN
Glycosaminoglycan biosynthesis - keratan sulfate
SIAT4A	beta-galactoside alpha-2,3-sialyltransferase (sialyltransferase 4A)
Protein processing in endoplasmic reticulum
OST4	oligosaccharyl transferase complex subunit
Tryptophan metabolism
INMT	methyltransferase [EC:2.1.1.49
Cushing syndrome
CYP21A	steroid 21-monooxygenase
Glutamatergic synapse
ADRBK	beta-adrenergic-receptor kinase
Carbon fixation in photosynthetic organisms
E1.1.1.82	malate dehydrogenase (NADP+)
Carbon fixation pathways in prokaryotes
sdhB	succinate dehydrogenase / fumarate reductase, iron-sulfur subunit [EC:1.3.5.1
Phototransduction - fly
ADRBK	beta-adrenergic-receptor kinase
Two-component system
fbcH	ubiquinol-cytochrome c reductase cytochrome b/c1
RNA degradation
pcnB	poly(A) polymerase
mRNA surveillance pathway
RNMT	mRNA (guanine-N7-)-methyltransferase
Pathways in cancer
HMOX1	heme oxygenase 1
Pantothenate and CoA biosynthesis
ilvC	ketol-acid reductoisomerase
Alcoholism
CAMKK1	calcium/calmodulin-dependent protein kinase kinase 1
Lysine biosynthesis
LYS1	saccharopine dehydrogenase (NAD+, L-lysine forming)
Peptidoglycan biosynthesis
murA	UDP-N-acetylglucosamine 1-carboxyvinyltransferase
Biofilm formation - Vibrio cholerae
cysE	serine O-acetyltransferase
Morphine addiction
ADRBK	beta-adrenergic-receptor kinase
Fluid shear stress and atherosclerosis
HMOX1	heme oxygenase 1
Taurine and hypotaurine metabolism
gudB	glutamate dehydrogenase
alpha-Linolenic acid metabolism
E1.3.3.6	acyl-CoA oxidase
Sesquiterpenoid and triterpenoid biosynthesis
SQLE	squalene monooxygenase
MAPK signaling pathway - plant
ndk	nucleoside-diphosphate kinase
Proximal tubule bicarbonate reclamation
GLUD1_2	glutamate dehydrogenase (NAD(P)+)
Cortisol synthesis and secretion
CYP21A	steroid 21-monooxygenase
N-Glycan biosynthesis
OST4	oligosaccharyl transferase complex subunit
Valine, leucine and isoleucine degradation
mmsB	3-hydroxyisobutyrate dehydrogenase
Naphthalene degradation
E1.14.13.1	salicylate hydroxylase
Fructose and mannose metabolism
E2.7.1.105	6-phosphofructo-2-kinase
Mineral absorption
HMOX1	heme oxygenase 1
Cyanoamino acid metabolism
glyA	glycine hydroxymethyltransferase
Chloroalkane and chloroalkene degradation
anfG	nitrogenase delta subunit
Various types of N-glycan biosynthesis
OST4	oligosaccharyl transferase complex subunit
Fatty acid degradation
E1.3.3.6	acyl-CoA oxidase
Phenylpropanoid biosynthesis
E1.11.1.7	peroxidase
MicroRNAs in cancer
HMOX1	heme oxygenase 1
Butanoate metabolism
sdhB	succinate dehydrogenase / fumarate reductase, iron-sulfur subunit [EC:1.3.5.1
Novobiocin biosynthesis
tyrC	cyclohexadieny/prephenate dehydrogenase [EC:1.3.1.43
HIF-1 signaling pathway
HMOX1	heme oxygenase 1
cAMP signaling pathway
E1.3.3.6	acyl-CoA oxidase
Glycerolipid metabolism
ATS1	glycerol-3-phosphate O-acyltransferase
Streptomycin biosynthesis
iolG	myo-inositol 2-dehydrogenase / D-chiro-inositol 1-dehydrogenase [EC:1.1.1.18
Antifolate resistance
glyA	glycine hydroxymethyltransferase
Ubiquinone and other terpenoid-quinone biosynthesis
COQ3	polyprenyldihydroxybenzoate methyltransferase / 3-demethylubiquinol 3-O-methyltransferase [EC:2.1.1.114
Glutathione metabolism
SE	pyrimidodiazepine synthase

## Sheet: c)
Metabolic pathways
iolG	myo-inositol 2-dehydrogenase / D-chiro-inositol 1-dehydrogenase [EC:1.1.1.18
mmsB	3-hydroxyisobutyrate dehydrogenase
IDH3	isocitrate dehydrogenase (NAD+)
uxuB	fructuronate reductase
E1.1.1.82	malate dehydrogenase (NADP+)
leuB	3-isopropylmalate dehydrogenase
ilvC	ketol-acid reductoisomerase
betB	betaine-aldehyde dehydrogenase
tyrC	cyclohexadieny/prephenate dehydrogenase [EC:1.3.1.43
hemG	menaquinone-dependent protoporphyrinogen oxidase
sdhB	succinate dehydrogenase / fumarate reductase, iron-sulfur subunit [EC:1.3.5.1
DHODH	dihydroorotate dehydrogenase
gudB	glutamate dehydrogenase
GLUD1_2	glutamate dehydrogenase (NAD(P)+)
pdh	phenylalanine dehydrogenase
GLDC	glycine dehydrogenase
LYS1	saccharopine dehydrogenase (NAD+, L-lysine forming)
nuoA	NADH-quinone oxidoreductase subunit A
nuoC	NADH-quinone oxidoreductase subunit C
nuoK	NADH-quinone oxidoreductase subunit K
cysJ	sulfite reductase (NADPH) flavoprotein alpha-component
methyl coenzyme M reductase
E1.11.1.7	peroxidase
E1.13.11.4	gentisate 1,2-dioxygenase
E1.14.13.1	salicylate hydroxylase
phhA	phenylalanine-4-hydroxylase
HMOX1	heme oxygenase 1
SQLE	squalene monooxygenase
CYP21A	steroid 21-monooxygenase
anfG	nitrogenase delta subunit
PLMT	phosphatidyl-N-methylethanolamine N-methyltransferase
COQ3	polyprenyldihydroxybenzoate methyltransferase / 3-demethylubiquinol 3-O-methyltransferase [EC:2.1.1.114
glyA	glycine hydroxymethyltransferase
argJ	glutamate N-acetyltransferase / amino-acid N-acetyltransferase [EC:2.3.1.35
ATS1	glycerol-3-phosphate O-acyltransferase
cysE	serine O-acetyltransferase
GALNT	polypeptide N-acetylgalactosaminyltransferase
UGCG	ceramide glucosyltransferase
OST4	oligosaccharyl transferase complex subunit
GYG1	glycogenin
hprT	hypoxanthine phosphoribosyltransferase
E2.4.2.24	1,4-beta-D-xylan synthase
SIAT4A	beta-galactoside alpha-2,3-sialyltransferase (sialyltransferase 4A)
murA	UDP-N-acetylglucosamine 1-carboxyvinyltransferase
cysC	adenylylsulfate kinase
neuA	N-acylneuraminate cytidylyltransferase
Biosynthesis of secondary metabolites
IDH3	isocitrate dehydrogenase (NAD+)
leuB	3-isopropylmalate dehydrogenase
ilvC	ketol-acid reductoisomerase
tyrC	cyclohexadieny/prephenate dehydrogenase [EC:1.3.1.43
hemG	menaquinone-dependent protoporphyrinogen oxidase
sdhB	succinate dehydrogenase / fumarate reductase, iron-sulfur subunit [EC:1.3.5.1
pdh	phenylalanine dehydrogenase
GLDC	glycine dehydrogenase
LYS1	saccharopine dehydrogenase (NAD+, L-lysine forming)
E1.11.1.7	peroxidase
HMOX1	heme oxygenase 1
SQLE	squalene monooxygenase
PLMT	phosphatidyl-N-methylethanolamine N-methyltransferase
COQ3	polyprenyldihydroxybenzoate methyltransferase / 3-demethylubiquinol 3-O-methyltransferase [EC:2.1.1.114
glyA	glycine hydroxymethyltransferase
argJ	glutamate N-acetyltransferase / amino-acid N-acetyltransferase [EC:2.3.1.35
ATS1	glycerol-3-phosphate O-acyltransferase
cysE	serine O-acetyltransferase
hprT	hypoxanthine phosphoribosyltransferase
Microbial metabolism in diverse environments
iolG	myo-inositol 2-dehydrogenase / D-chiro-inositol 1-dehydrogenase [EC:1.1.1.18
IDH3	isocitrate dehydrogenase (NAD+)
E1.1.1.82	malate dehydrogenase (NADP+)
cdhB	acetyl-CoA decarbonylase/synthase complex subunit
sdhB	succinate dehydrogenase / fumarate reductase, iron-sulfur subunit [EC:1.3.5.1
gudB	glutamate dehydrogenase
GLUD1_2	glutamate dehydrogenase (NAD(P)+)
nasB	assimilatory nitrate reductase electron transfer subunit
cysJ	sulfite reductase (NADPH) flavoprotein alpha-component
methyl coenzyme M reductase
E1.13.11.4	gentisate 1,2-dioxygenase
E1.14.13.1	salicylate hydroxylase
anfG	nitrogenase delta subunit
glyA	glycine hydroxymethyltransferase
cysE	serine O-acetyltransferase
cysC	adenylylsulfate kinase
Biosynthesis of antibiotics
iolG	myo-inositol 2-dehydrogenase / D-chiro-inositol 1-dehydrogenase [EC:1.1.1.18
IDH3	isocitrate dehydrogenase (NAD+)
ilvC	ketol-acid reductoisomerase
sdhB	succinate dehydrogenase / fumarate reductase, iron-sulfur subunit [EC:1.3.5.1
pdh	phenylalanine dehydrogenase
GLDC	glycine dehydrogenase
LYS1	saccharopine dehydrogenase (NAD+, L-lysine forming)
SQLE	squalene monooxygenase
glyA	glycine hydroxymethyltransferase
argJ	glutamate N-acetyltransferase / amino-acid N-acetyltransferase [EC:2.3.1.35
Biosynthesis of amino acids
IDH3	isocitrate dehydrogenase (NAD+)
leuB	3-isopropylmalate dehydrogenase
ilvC	ketol-acid reductoisomerase
tyrC	cyclohexadieny/prephenate dehydrogenase [EC:1.3.1.43
LYS1	saccharopine dehydrogenase (NAD+, L-lysine forming)
phhA	phenylalanine-4-hydroxylase
glyA	glycine hydroxymethyltransferase
argJ	glutamate N-acetyltransferase / amino-acid N-acetyltransferase [EC:2.3.1.35
cysE	serine O-acetyltransferase
Carbon metabolism
IDH3	isocitrate dehydrogenase (NAD+)
E1.1.1.82	malate dehydrogenase (NADP+)
cdhB	acetyl-CoA decarbonylase/synthase complex subunit
sdhB	succinate dehydrogenase / fumarate reductase, iron-sulfur subunit [EC:1.3.5.1
GLUD1_2	glutamate dehydrogenase (NAD(P)+)
GLDC	glycine dehydrogenase
glyA	glycine hydroxymethyltransferase
cysE	serine O-acetyltransferase
Oxidative phosphorylation
sdhB	succinate dehydrogenase / fumarate reductase, iron-sulfur subunit [EC:1.3.5.1
nuoA	NADH-quinone oxidoreductase subunit A
nuoC	NADH-quinone oxidoreductase subunit C
nuoK	NADH-quinone oxidoreductase subunit K
Nitrogen metabolism
gudB	glutamate dehydrogenase
GLUD1_2	glutamate dehydrogenase (NAD(P)+)
nasB	assimilatory nitrate reductase electron transfer subunit
anfG	nitrogenase delta subunit
2-Oxocarboxylic acid metabolism
IDH3	isocitrate dehydrogenase (NAD+)
leuB	3-isopropylmalate dehydrogenase
ilvC	ketol-acid reductoisomerase
argJ	glutamate N-acetyltransferase / amino-acid N-acetyltransferase [EC:2.3.1.35
Glycerophospholipid metabolism
PLMT	phosphatidyl-N-methylethanolamine N-methyltransferase
CHAT	choline O-acetyltransferase
ATS1	glycerol-3-phosphate O-acyltransferase
tagD	glycerol-3-phosphate cytidylyltransferase
Arginine biosynthesis
gudB	glutamate dehydrogenase
GLUD1_2	glutamate dehydrogenase (NAD(P)+)
argJ	glutamate N-acetyltransferase / amino-acid N-acetyltransferase [EC:2.3.1.35
Sulfur metabolism
cysJ	sulfite reductase (NADPH) flavoprotein alpha-component
cysE	serine O-acetyltransferase
cysC	adenylylsulfate kinase
Phenylalanine, tyrosine and tryptophan biosynthesis
tyrC	cyclohexadieny/prephenate dehydrogenase [EC:1.3.1.43
pdh	phenylalanine dehydrogenase
phhA	phenylalanine-4-hydroxylase
Methane metabolism
cdhB	acetyl-CoA decarbonylase/synthase complex subunit
methyl coenzyme M reductase
glyA	glycine hydroxymethyltransferase
Glycine, serine and threonine metabolism
betB	betaine-aldehyde dehydrogenase
GLDC	glycine dehydrogenase
glyA	glycine hydroxymethyltransferase
Amino sugar and nucleotide sugar metabolism
E2.4.2.24	1,4-beta-D-xylan synthase
murA	UDP-N-acetylglucosamine 1-carboxyvinyltransferase
neuA	N-acylneuraminate cytidylyltransferase
Citrate cycle (TCA cycle)
IDH3	isocitrate dehydrogenase (NAD+)
sdhB	succinate dehydrogenase / fumarate reductase, iron-sulfur subunit [EC:1.3.5.1
Mucin type O-glycan biosynthesis
GALNT	polypeptide N-acetylgalactosaminyltransferase
SIAT4A	beta-galactoside alpha-2,3-sialyltransferase (sialyltransferase 4A)
Valine, leucine and isoleucine biosynthesis
leuB	3-isopropylmalate dehydrogenase
ilvC	ketol-acid reductoisomerase
Steroid hormone biosynthesis
HSD11B2	corticosteroid 11-beta-dehydrogenase isozyme 2
CYP21A	steroid 21-monooxygenase
Glyoxylate and dicarboxylate metabolism
GLDC	glycine dehydrogenase
glyA	glycine hydroxymethyltransferase
Purine metabolism
hprT	hypoxanthine phosphoribosyltransferase
cysC	adenylylsulfate kinase
Folate biosynthesis
SE	pyrimidodiazepine synthase
phhA	phenylalanine-4-hydroxylase
Neuroactive ligand-receptor interaction
HRH2	histamine receptor
HRH3	histamine receptor
Endocytosis
GRK1_7	rhodopsin kinase
ADRBK	beta-adrenergic-receptor kinase
Lysine degradation
LYS1	saccharopine dehydrogenase (NAD+, L-lysine forming)
PLOD1	procollagen-lysine,2-oxoglutarate 5-dioxygenase 1
Phenylalanine metabolism
pdh	phenylalanine dehydrogenase
phhA	phenylalanine-4-hydroxylase
Alanine, aspartate and glutamate metabolism
gudB	glutamate dehydrogenase
GLUD1_2	glutamate dehydrogenase (NAD(P)+)
Chemokine signaling pathway
GRK1_7	rhodopsin kinase
ADRBK	beta-adrenergic-receptor kinase
Porphyrin and chlorophyll metabolism
hemG	menaquinone-dependent protoporphyrinogen oxidase
HMOX1	heme oxygenase 1
TGF-beta signaling pathway
NOG
DCN
Tyrosine metabolism
pdh	phenylalanine dehydrogenase
E1.13.11.4	gentisate 1,2-dioxygenase
Glutamatergic synapse
ADRBK	beta-adrenergic-receptor kinase
Glutathione metabolism
SE	pyrimidodiazepine synthase
D-Glutamine and D-glutamate metabolism
GLUD1_2	glutamate dehydrogenase (NAD(P)+)
Carbon fixation pathways in prokaryotes
sdhB	succinate dehydrogenase / fumarate reductase, iron-sulfur subunit [EC:1.3.5.1
Naphthalene degradation
E1.14.13.1	salicylate hydroxylase
Pyrimidine metabolism
DHODH	dihydroorotate dehydrogenase
Retinol metabolism
RDH5	11-cis-retinol dehydrogenase
Gastric acid secretion
HRH2	histamine receptor
Aldosterone synthesis and secretion
CYP21A	steroid 21-monooxygenase
N-Glycan biosynthesis
OST4	oligosaccharyl transferase complex subunit
Protein processing in endoplasmic reticulum
OST4	oligosaccharyl transferase complex subunit
Butanoate metabolism
sdhB	succinate dehydrogenase / fumarate reductase, iron-sulfur subunit [EC:1.3.5.1
Chloroalkane and chloroalkene degradation
anfG	nitrogenase delta subunit
Phenylpropanoid biosynthesis
E1.11.1.7	peroxidase
Valine, leucine and isoleucine degradation
mmsB	3-hydroxyisobutyrate dehydrogenase
Antifolate resistance
glyA	glycine hydroxymethyltransferase
Inositol phosphate metabolism
iolG	myo-inositol 2-dehydrogenase / D-chiro-inositol 1-dehydrogenase [EC:1.1.1.18
Degradation of aromatic compounds
E1.14.13.1	salicylate hydroxylase
Phototransduction
GRK1_7	rhodopsin kinase
Drug metabolism - other enzymes
hprT	hypoxanthine phosphoribosyltransferase
Polycyclic aromatic hydrocarbon degradation
E1.14.13.1	salicylate hydroxylase
Glycosphingolipid biosynthesis - ganglio series
SIAT4A	beta-galactoside alpha-2,3-sialyltransferase (sialyltransferase 4A)
Pyruvate metabolism
E1.1.1.82	malate dehydrogenase (NADP+)
Cholinergic synapse
CHAT	choline O-acetyltransferase
Streptomycin biosynthesis
iolG	myo-inositol 2-dehydrogenase / D-chiro-inositol 1-dehydrogenase [EC:1.1.1.18
Tryptophan metabolism
INMT	methyltransferase [EC:2.1.1.49
Ubiquinone and other terpenoid-quinone biosynthesis
COQ3	polyprenyldihydroxybenzoate methyltransferase / 3-demethylubiquinol 3-O-methyltransferase [EC:2.1.1.114
Taurine and hypotaurine metabolism
gudB	glutamate dehydrogenase
Pantothenate and CoA biosynthesis
ilvC	ketol-acid reductoisomerase
Glycosphingolipid biosynthesis - globo and isoglobo series
SIAT4A	beta-galactoside alpha-2,3-sialyltransferase (sialyltransferase 4A)
Hedgehog signaling pathway
ADRBK	beta-adrenergic-receptor kinase
Cysteine and methionine metabolism
cysE	serine O-acetyltransferase
Cushing syndrome
CYP21A	steroid 21-monooxygenase
Necroptosis
GLUD1_2	glutamate dehydrogenase (NAD(P)+)
Proximal tubule bicarbonate reclamation
GLUD1_2	glutamate dehydrogenase (NAD(P)+)
Lysine biosynthesis
LYS1	saccharopine dehydrogenase (NAD+, L-lysine forming)
Steroid biosynthesis
SQLE	squalene monooxygenase
Peptidoglycan biosynthesis
murA	UDP-N-acetylglucosamine 1-carboxyvinyltransferase
MicroRNAs in cancer
HMOX1	heme oxygenase 1
Various types of N-glycan biosynthesis
OST4	oligosaccharyl transferase complex subunit
Selenocompound metabolism
INMT	methyltransferase [EC:2.1.1.49
Morphine addiction
ADRBK	beta-adrenergic-receptor kinase
Phototransduction - fly
ADRBK	beta-adrenergic-receptor kinase
Aldosterone-regulated sodium reabsorption
HSD11B2	corticosteroid 11-beta-dehydrogenase isozyme 2
One carbon pool by folate
glyA	glycine hydroxymethyltransferase
Biofilm formation - Vibrio cholerae
cysE	serine O-acetyltransferase
RNA degradation
pcnB	poly(A) polymerase
Starch and sucrose metabolism
GYG1	glycogenin
Hepatocellular carcinoma
HMOX1	heme oxygenase 1
C5-Branched dibasic acid metabolism
leuB	3-isopropylmalate dehydrogenase
Novobiocin biosynthesis
tyrC	cyclohexadieny/prephenate dehydrogenase [EC:1.3.1.43
Fluid shear stress and atherosclerosis
HMOX1	heme oxygenase 1
Olfactory transduction
ADRBK	beta-adrenergic-receptor kinase
Pentose and glucuronate interconversions
uxuB	fructuronate reductase
Glycerolipid metabolism
ATS1	glycerol-3-phosphate O-acyltransferase
Sesquiterpenoid and triterpenoid biosynthesis
SQLE	squalene monooxygenase
Proteoglycans in cancer
DCN
Alcoholism
CAMKK1	calcium/calmodulin-dependent protein kinase kinase 1
Cortisol synthesis and secretion
CYP21A	steroid 21-monooxygenase
Sphingolipid metabolism
UGCG	ceramide glucosyltransferase
Pathways in cancer
HMOX1	heme oxygenase 1
HIF-1 signaling pathway
HMOX1	heme oxygenase 1
Calcium signaling pathway
HRH2	histamine receptor
Cyanoamino acid metabolism
glyA	glycine hydroxymethyltransferase
Fructose and mannose metabolism
E2.7.1.105	6-phosphofructo-2-kinase
Glycosaminoglycan biosynthesis - keratan sulfate
SIAT4A	beta-galactoside alpha-2,3-sialyltransferase (sialyltransferase 4A)
Mineral absorption
HMOX1	heme oxygenase 1
Dioxin degradation
E1.14.13.1	salicylate hydroxylase
Ferroptosis
HMOX1	heme oxygenase 1
Carbon fixation in photosynthetic organisms
E1.1.1.82	malate dehydrogenase (NADP+)

## Sheet: d)
Metabolic pathways
iolG	myo-inositol 2-dehydrogenase / D-chiro-inositol 1-dehydrogenase [EC:1.1.1.18
mmsB	3-hydroxyisobutyrate dehydrogenase
IDH3	isocitrate dehydrogenase (NAD+)
uxuB	fructuronate reductase
E1.1.1.82	malate dehydrogenase (NADP+)
leuB	3-isopropylmalate dehydrogenase
ilvC	ketol-acid reductoisomerase
SPR	sepiapterin reductase
betB	betaine-aldehyde dehydrogenase
tyrC	cyclohexadieny/prephenate dehydrogenase [EC:1.3.1.43
hemG	menaquinone-dependent protoporphyrinogen oxidase
sdhB	succinate dehydrogenase / fumarate reductase, iron-sulfur subunit [EC:1.3.5.1
DHODH	dihydroorotate dehydrogenase
gudB	glutamate dehydrogenase
pdh	phenylalanine dehydrogenase
LYS1	saccharopine dehydrogenase (NAD+, L-lysine forming)
nuoA	NADH-quinone oxidoreductase subunit A
nuoC	NADH-quinone oxidoreductase subunit C
nuoK	NADH-quinone oxidoreductase subunit K
methyl coenzyme M reductase
fbcH	ubiquinol-cytochrome c reductase cytochrome b/c1
E1.11.1.7	peroxidase
E1.14.13.1	salicylate hydroxylase
phhA	phenylalanine-4-hydroxylase
HMOX1	heme oxygenase 1
SQLE	squalene monooxygenase
CYP21A	steroid 21-monooxygenase
anfG	nitrogenase delta subunit
PLMT	phosphatidyl-N-methylethanolamine N-methyltransferase
COQ3	polyprenyldihydroxybenzoate methyltransferase / 3-demethylubiquinol 3-O-methyltransferase [EC:2.1.1.114
glyA	glycine hydroxymethyltransferase
E2.1.2.2	phosphoribosylglycinamide formyltransferase
argJ	glutamate N-acetyltransferase / amino-acid N-acetyltransferase [EC:2.3.1.35
DLAT	pyruvate dehydrogenase E2 component (dihydrolipoamide acetyltransferase)
ATS1	glycerol-3-phosphate O-acyltransferase
cysE	serine O-acetyltransferase
E2.3.1.37	5-aminolevulinate synthase
GALNT	polypeptide N-acetylgalactosaminyltransferase
UGCG	ceramide glucosyltransferase
GYG1	glycogenin
hprT	hypoxanthine phosphoribosyltransferase
E2.4.2.24	1,4-beta-D-xylan synthase
SIAT4A	beta-galactoside alpha-2,3-sialyltransferase (sialyltransferase 4A)
murA	UDP-N-acetylglucosamine 1-carboxyvinyltransferase
cysC	adenylylsulfate kinase
ndk	nucleoside-diphosphate kinase
neuA	N-acylneuraminate cytidylyltransferase
Biosynthesis of secondary metabolites
IDH3	isocitrate dehydrogenase (NAD+)
leuB	3-isopropylmalate dehydrogenase
ilvC	ketol-acid reductoisomerase
tyrC	cyclohexadieny/prephenate dehydrogenase [EC:1.3.1.43
hemG	menaquinone-dependent protoporphyrinogen oxidase
sdhB	succinate dehydrogenase / fumarate reductase, iron-sulfur subunit [EC:1.3.5.1
pdh	phenylalanine dehydrogenase
LYS1	saccharopine dehydrogenase (NAD+, L-lysine forming)
E1.11.1.7	peroxidase
HMOX1	heme oxygenase 1
SQLE	squalene monooxygenase
PLMT	phosphatidyl-N-methylethanolamine N-methyltransferase
COQ3	polyprenyldihydroxybenzoate methyltransferase / 3-demethylubiquinol 3-O-methyltransferase [EC:2.1.1.114
glyA	glycine hydroxymethyltransferase
E2.1.2.2	phosphoribosylglycinamide formyltransferase
argJ	glutamate N-acetyltransferase / amino-acid N-acetyltransferase [EC:2.3.1.35
DLAT	pyruvate dehydrogenase E2 component (dihydrolipoamide acetyltransferase)
ATS1	glycerol-3-phosphate O-acyltransferase
cysE	serine O-acetyltransferase
E2.3.1.37	5-aminolevulinate synthase
hprT	hypoxanthine phosphoribosyltransferase
ndk	nucleoside-diphosphate kinase
Microbial metabolism in diverse environments
iolG	myo-inositol 2-dehydrogenase / D-chiro-inositol 1-dehydrogenase [EC:1.1.1.18
IDH3	isocitrate dehydrogenase (NAD+)
E1.1.1.82	malate dehydrogenase (NADP+)
cdhB	acetyl-CoA decarbonylase/synthase complex subunit
sdhB	succinate dehydrogenase / fumarate reductase, iron-sulfur subunit [EC:1.3.5.1
gudB	glutamate dehydrogenase
methyl coenzyme M reductase
E1.14.13.1	salicylate hydroxylase
anfG	nitrogenase delta subunit
glyA	glycine hydroxymethyltransferase
DLAT	pyruvate dehydrogenase E2 component (dihydrolipoamide acetyltransferase)
cysE	serine O-acetyltransferase
cysC	adenylylsulfate kinase
Biosynthesis of antibiotics
iolG	myo-inositol 2-dehydrogenase / D-chiro-inositol 1-dehydrogenase [EC:1.1.1.18
IDH3	isocitrate dehydrogenase (NAD+)
ilvC	ketol-acid reductoisomerase
sdhB	succinate dehydrogenase / fumarate reductase, iron-sulfur subunit [EC:1.3.5.1
pdh	phenylalanine dehydrogenase
LYS1	saccharopine dehydrogenase (NAD+, L-lysine forming)
SQLE	squalene monooxygenase
glyA	glycine hydroxymethyltransferase
E2.1.2.2	phosphoribosylglycinamide formyltransferase
argJ	glutamate N-acetyltransferase / amino-acid N-acetyltransferase [EC:2.3.1.35
DLAT	pyruvate dehydrogenase E2 component (dihydrolipoamide acetyltransferase)
ndk	nucleoside-diphosphate kinase
Biosynthesis of amino acids
IDH3	isocitrate dehydrogenase (NAD+)
leuB	3-isopropylmalate dehydrogenase
ilvC	ketol-acid reductoisomerase
tyrC	cyclohexadieny/prephenate dehydrogenase [EC:1.3.1.43
LYS1	saccharopine dehydrogenase (NAD+, L-lysine forming)
phhA	phenylalanine-4-hydroxylase
glyA	glycine hydroxymethyltransferase
argJ	glutamate N-acetyltransferase / amino-acid N-acetyltransferase [EC:2.3.1.35
cysE	serine O-acetyltransferase
Carbon metabolism
IDH3	isocitrate dehydrogenase (NAD+)
E1.1.1.82	malate dehydrogenase (NADP+)
cdhB	acetyl-CoA decarbonylase/synthase complex subunit
sdhB	succinate dehydrogenase / fumarate reductase, iron-sulfur subunit [EC:1.3.5.1
glyA	glycine hydroxymethyltransferase
DLAT	pyruvate dehydrogenase E2 component (dihydrolipoamide acetyltransferase)
cysE	serine O-acetyltransferase
Oxidative phosphorylation
sdhB	succinate dehydrogenase / fumarate reductase, iron-sulfur subunit [EC:1.3.5.1
nuoA	NADH-quinone oxidoreductase subunit A
nuoC	NADH-quinone oxidoreductase subunit C
nuoK	NADH-quinone oxidoreductase subunit K
fbcH	ubiquinol-cytochrome c reductase cytochrome b/c1
2-Oxocarboxylic acid metabolism
IDH3	isocitrate dehydrogenase (NAD+)
leuB	3-isopropylmalate dehydrogenase
ilvC	ketol-acid reductoisomerase
argJ	glutamate N-acetyltransferase / amino-acid N-acetyltransferase [EC:2.3.1.35
Purine metabolism
E2.1.2.2	phosphoribosylglycinamide formyltransferase
hprT	hypoxanthine phosphoribosyltransferase
cysC	adenylylsulfate kinase
ndk	nucleoside-diphosphate kinase
Glycerophospholipid metabolism
PLMT	phosphatidyl-N-methylethanolamine N-methyltransferase
ATS1	glycerol-3-phosphate O-acyltransferase
tagD	glycerol-3-phosphate cytidylyltransferase
Citrate cycle (TCA cycle)
IDH3	isocitrate dehydrogenase (NAD+)
sdhB	succinate dehydrogenase / fumarate reductase, iron-sulfur subunit [EC:1.3.5.1
DLAT	pyruvate dehydrogenase E2 component (dihydrolipoamide acetyltransferase)
Phenylalanine, tyrosine and tryptophan biosynthesis
tyrC	cyclohexadieny/prephenate dehydrogenase [EC:1.3.1.43
pdh	phenylalanine dehydrogenase
phhA	phenylalanine-4-hydroxylase
Folate biosynthesis
SPR	sepiapterin reductase
SE	pyrimidodiazepine synthase
phhA	phenylalanine-4-hydroxylase
Amino sugar and nucleotide sugar metabolism
E2.4.2.24	1,4-beta-D-xylan synthase
murA	UDP-N-acetylglucosamine 1-carboxyvinyltransferase
neuA	N-acylneuraminate cytidylyltransferase
Porphyrin and chlorophyll metabolism
hemG	menaquinone-dependent protoporphyrinogen oxidase
HMOX1	heme oxygenase 1
E2.3.1.37	5-aminolevulinate synthase
Lysine degradation
LYS1	saccharopine dehydrogenase (NAD+, L-lysine forming)
E1.14.11.1	gamma-butyrobetaine dioxygenase
PLOD1	procollagen-lysine,2-oxoglutarate 5-dioxygenase 1
Methane metabolism
cdhB	acetyl-CoA decarbonylase/synthase complex subunit
methyl coenzyme M reductase
glyA	glycine hydroxymethyltransferase
Glycine, serine and threonine metabolism
betB	betaine-aldehyde dehydrogenase
glyA	glycine hydroxymethyltransferase
E2.3.1.37	5-aminolevulinate synthase
Valine, leucine and isoleucine biosynthesis
leuB	3-isopropylmalate dehydrogenase
ilvC	ketol-acid reductoisomerase
Mucin type O-glycan biosynthesis
GALNT	polypeptide N-acetylgalactosaminyltransferase
SIAT4A	beta-galactoside alpha-2,3-sialyltransferase (sialyltransferase 4A)
Drug metabolism - other enzymes
hprT	hypoxanthine phosphoribosyltransferase
ndk	nucleoside-diphosphate kinase
Chemokine signaling pathway
GRK1_7	rhodopsin kinase
ADRBK	beta-adrenergic-receptor kinase
Neuroactive ligand-receptor interaction
HRH2	histamine receptor
HRH3	histamine receptor
Endocytosis
GRK1_7	rhodopsin kinase
ADRBK	beta-adrenergic-receptor kinase
Pyruvate metabolism
E1.1.1.82	malate dehydrogenase (NADP+)
DLAT	pyruvate dehydrogenase E2 component (dihydrolipoamide acetyltransferase)
Pyrimidine metabolism
DHODH	dihydroorotate dehydrogenase
ndk	nucleoside-diphosphate kinase
Phenylalanine metabolism
pdh	phenylalanine dehydrogenase
phhA	phenylalanine-4-hydroxylase
One carbon pool by folate
glyA	glycine hydroxymethyltransferase
E2.1.2.2	phosphoribosylglycinamide formyltransferase
Nitrogen metabolism
gudB	glutamate dehydrogenase
anfG	nitrogenase delta subunit
TGF-beta signaling pathway
NOG
DCN
Steroid hormone biosynthesis
HSD11B2	corticosteroid 11-beta-dehydrogenase isozyme 2
CYP21A	steroid 21-monooxygenase
Sulfur metabolism
cysE	serine O-acetyltransferase
cysC	adenylylsulfate kinase
Arginine biosynthesis
gudB	glutamate dehydrogenase
argJ	glutamate N-acetyltransferase / amino-acid N-acetyltransferase [EC:2.3.1.35
Valine, leucine and isoleucine degradation
mmsB	3-hydroxyisobutyrate dehydrogenase
Two-component system
fbcH	ubiquinol-cytochrome c reductase cytochrome b/c1
Inositol phosphate metabolism
iolG	myo-inositol 2-dehydrogenase / D-chiro-inositol 1-dehydrogenase [EC:1.1.1.18
Phototransduction - fly
ADRBK	beta-adrenergic-receptor kinase
Calcium signaling pathway
HRH2	histamine receptor
Dioxin degradation
E1.14.13.1	salicylate hydroxylase
Alcoholism
CAMKK1	calcium/calmodulin-dependent protein kinase kinase 1
Alanine, aspartate and glutamate metabolism
gudB	glutamate dehydrogenase
Ferroptosis
HMOX1	heme oxygenase 1
Glycolysis / Gluconeogenesis
DLAT	pyruvate dehydrogenase E2 component (dihydrolipoamide acetyltransferase)
Aldosterone synthesis and secretion
CYP21A	steroid 21-monooxygenase
Selenocompound metabolism
INMT	methyltransferase [EC:2.1.1.49
Butanoate metabolism
sdhB	succinate dehydrogenase / fumarate reductase, iron-sulfur subunit [EC:1.3.5.1
Novobiocin biosynthesis
tyrC	cyclohexadieny/prephenate dehydrogenase [EC:1.3.1.43
Carbon fixation pathways in prokaryotes
sdhB	succinate dehydrogenase / fumarate reductase, iron-sulfur subunit [EC:1.3.5.1
Pentose and glucuronate interconversions
uxuB	fructuronate reductase
Degradation of aromatic compounds
E1.14.13.1	salicylate hydroxylase
Lysine biosynthesis
LYS1	saccharopine dehydrogenase (NAD+, L-lysine forming)
Glutathione metabolism
SE	pyrimidodiazepine synthase
Carbon fixation in photosynthetic organisms
E1.1.1.82	malate dehydrogenase (NADP+)
Pantothenate and CoA biosynthesis
ilvC	ketol-acid reductoisomerase
Cortisol synthesis and secretion
CYP21A	steroid 21-monooxygenase
Mineral absorption
HMOX1	heme oxygenase 1
Fluid shear stress and atherosclerosis
HMOX1	heme oxygenase 1
Phototransduction
GRK1_7	rhodopsin kinase
Glutamatergic synapse
ADRBK	beta-adrenergic-receptor kinase
C5-Branched dibasic acid metabolism
leuB	3-isopropylmalate dehydrogenase
Hepatocellular carcinoma
HMOX1	heme oxygenase 1
Biofilm formation - Vibrio cholerae
cysE	serine O-acetyltransferase
Cushing syndrome
CYP21A	steroid 21-monooxygenase
Cysteine and methionine metabolism
cysE	serine O-acetyltransferase
Glycosphingolipid biosynthesis - globo and isoglobo series
SIAT4A	beta-galactoside alpha-2,3-sialyltransferase (sialyltransferase 4A)
Steroid biosynthesis
SQLE	squalene monooxygenase
Polycyclic aromatic hydrocarbon degradation
E1.14.13.1	salicylate hydroxylase
Taurine and hypotaurine metabolism
gudB	glutamate dehydrogenase
Sphingolipid metabolism
UGCG	ceramide glucosyltransferase
MicroRNAs in cancer
HMOX1	heme oxygenase 1
Sesquiterpenoid and triterpenoid biosynthesis
SQLE	squalene monooxygenase
Naphthalene degradation
E1.14.13.1	salicylate hydroxylase
MAPK signaling pathway - plant
ndk	nucleoside-diphosphate kinase
Pathways in cancer
HMOX1	heme oxygenase 1
Hedgehog signaling pathway
ADRBK	beta-adrenergic-receptor kinase
Proteoglycans in cancer
DCN
Fructose and mannose metabolism
E2.7.1.105	6-phosphofructo-2-kinase
Phenylpropanoid biosynthesis
E1.11.1.7	peroxidase
Tyrosine metabolism
pdh	phenylalanine dehydrogenase
Gastric acid secretion
HRH2	histamine receptor
Morphine addiction
ADRBK	beta-adrenergic-receptor kinase
Glyoxylate and dicarboxylate metabolism
glyA	glycine hydroxymethyltransferase
Cyanoamino acid metabolism
glyA	glycine hydroxymethyltransferase
Aldosterone-regulated sodium reabsorption
HSD11B2	corticosteroid 11-beta-dehydrogenase isozyme 2
Peptidoglycan biosynthesis
murA	UDP-N-acetylglucosamine 1-carboxyvinyltransferase
Glycosaminoglycan biosynthesis - keratan sulfate
SIAT4A	beta-galactoside alpha-2,3-sialyltransferase (sialyltransferase 4A)
RNA degradation
pcnB	poly(A) polymerase
HIF-1 signaling pathway
HMOX1	heme oxygenase 1
Chloroalkane and chloroalkene degradation
anfG	nitrogenase delta subunit
Tryptophan metabolism
INMT	methyltransferase [EC:2.1.1.49
Glycosphingolipid biosynthesis - ganglio series
SIAT4A	beta-galactoside alpha-2,3-sialyltransferase (sialyltransferase 4A)
Olfactory transduction
ADRBK	beta-adrenergic-receptor kinase
Streptomycin biosynthesis
iolG	myo-inositol 2-dehydrogenase / D-chiro-inositol 1-dehydrogenase [EC:1.1.1.18
Ubiquinone and other terpenoid-quinone biosynthesis
COQ3	polyprenyldihydroxybenzoate methyltransferase / 3-demethylubiquinol 3-O-methyltransferase [EC:2.1.1.114
Antifolate resistance
glyA	glycine hydroxymethyltransferase
Starch and sucrose metabolism
GYG1	glycogenin
Glycerolipid metabolism
ATS1	glycerol-3-phosphate O-acyltransferase
