# Supplementary material for: Immune challenge reduces gut microbial diversity and triggers fertility-dependent gene expression changes in a social insect
Source: BMC Genomics. 2020 Nov 23;21:816. doi: 10.1186/s12864-020-07191-9 (PMC7682046; doi:10.1186/s12864-020-07191-9)
Supplement: Supplementary file 1 — Additional file 1. Additional methodological details, Figures S1 and S2 and Table S2. Description of additional supplementary tables (Tables S1, S3-S18) are also provided. [file 12864_2020_7191_MOESM1_ESM.zip › Table_S6.xlsx]

## Sheet: Module_significance
Module	Variables	Df	Fstat	Pvalue	FDR
Mod1	Challenge	1	1.500801151205	0.173	0.58005882
Mod1	Fertility	1	0.483496129604938	0.842	0.94105882
Mod1	Fertility:Challenge	1	0.711114178672692	0.7377	0.93442
Mod10	Challenge	1	0.557972012899232	0.4697	0.78601538
Mod10	Fertility	1	0.855073070514814	0.3561	0.74375172
Mod10	Fertility:Challenge	1	1.135961660248	0.293	0.66804
Mod11	Challenge	1	5.20411328783316	0.0029	0.02755
Mod11	Fertility	1	0.236972156441085	0.8253	0.940842
Mod11	Fertility:Challenge	1	0.304777669495066	0.7734	0.940842
Mod12	Challenge	1	1.84610845411656	0.1003	0.51973636
Mod12	Fertility	1	1.46875807993281	0.1974	0.5928
Mod12	Fertility:Challenge	1	1.09108180977396	0.3768	0.74375172
Mod13	Challenge	1	1.84610845411656	0.095	0.51973636
Mod13	Fertility	1	1.46875807993281	0.1976	0.5928
Mod13	Fertility:Challenge	1	1.09108180977396	0.3768	0.74375172
Mod14	Challenge	1	5.08981682553794	0.0276	0.19665
Mod14	Fertility	1	0.390350317206635	0.5873	0.79705
Mod14	Fertility:Challenge	1	2.40812453884826	0.1372	0.54454
Mod15	Challenge	1	0.873475355210091	0.3956	0.75164
Mod15	Fertility	1	0.0167305256747912	0.9145	0.94775455
Mod15	Fertility:Challenge	1	0.909355420146634	0.3784	0.74375172
Mod16	Challenge	1	15.2112437870145	0.0005	0.007125
Mod16	Fertility	1	2.15642819103592	0.1529	0.54470625
Mod16	Fertility:Challenge	1	0.0512489150251434	0.8251	0.940842
Mod17	Challenge	1	27.0615119112161	0.0002	0.0038
Mod17	Fertility	1	0.337451373640736	0.5733	0.79702683
Mod17	Fertility:Challenge	1	0.310689292616563	0.5724	0.79702683
Mod18	Challenge	1	12.7679250576008	0.0014	0.01596
Mod18	Fertility	1	2.40817770219166	0.1326	0.54454
Mod18	Fertility:Challenge	1	1.56708002560521	0.2239	0.60772857
Mod19	Challenge	1	0.201878553067497	0.6607	0.87581163
Mod19	Fertility	1	1.24957001284257	0.2906	0.66804
Mod19	Fertility:Challenge	1	0.0187496882665954	0.8904	0.94775455
Mod2	Challenge	1	0.208871806708809	0.6763	0.87611591
Mod2	Fertility	1	0.406452116702193	0.5337	0.78601538
Mod2	Fertility:Challenge	1	0.0228566717762947	0.8927	0.94775455
Mod3	Challenge	1	1.500801151205	0.2368	0.61352727
Mod3	Fertility	1	0.483496129604938	0.5221	0.78601538
Mod3	Fertility:Challenge	1	0.711114178672692	0.4317	0.78601538
Mod4	Challenge	1	18.831179473874	0.0002	0.0038
Mod4	Fertility	1	2.69166004788161	0.1108	0.5263
Mod4	Fertility:Challenge	1	0.379911273158945	0.5378	0.78601538
Mod5	Challenge	1	8.52381007811739	0.0002	0.0038
Mod5	Fertility	1	0.000701594959106478	0.988	0.988
Mod5	Fertility:Challenge	1	0.661396456032446	0.5095	0.78601538
Mod6	Challenge	1	0.0159416049616549	0.9075	0.94775455
Mod6	Fertility	1	1.68973088849323	0.2203	0.60772857
Mod6	Fertility:Challenge	1	1.31162236853607	0.2813	0.66804
Mod7	Challenge	1	0.565307285988462	0.4815	0.78601538
Mod7	Fertility	1	0.0774291481394552	0.7925	0.940842
Mod7	Fertility:Challenge	1	0.434039242205035	0.5336	0.78601538
Mod8	Challenge	1	6.65091810964241	0.0079	0.06432857
Mod8	Fertility	1	2.30469277019822	0.1433	0.54454
Mod8	Fertility:Challenge	1	0.0688831163015944	0.8053	0.940842
Mod9	Challenge	1	0.909963003466127	0.4477	0.78601538
Mod9	Fertility	1	2.59188141934047	0.0677	0.42876667
Mod9	Fertility:Challenge	1	0.0556133279093618	0.9471	0.9640125
