# Supplementary material for: Immune challenge reduces gut microbial diversity and triggers fertility-dependent gene expression changes in a social insect
Source: BMC Genomics. 2020 Nov 23;21:816. doi: 10.1186/s12864-020-07191-9 (PMC7682046; doi:10.1186/s12864-020-07191-9)
Supplement: Supplementary file 1 — Additional file 1. Additional methodological details, Figures S1 and S2 and Table S2. Description of additional supplementary tables (Tables S1, S3-S18) are also provided. [file 12864_2020_7191_MOESM1_ESM.zip › Table_S7.xlsx]

## Sheet: Module 1
	GO.ID	Term	Annotated	Significant	Expected	Fisher
1	GO:0006432	phenylalanyl-tRNA aminoacylation	25	2	0.07	0.0022
2	GO:0045823	positive regulation of heart contraction	1	1	0	0.0028
3	GO:0055085	transmembrane transport	1139	9	3.16	0.0034
4	GO:0006465	signal peptide processing	2	1	0.01	0.0055
5	GO:0000289	nuclear-transcribed mRNA poly(A) tail sh...	3	1	0.01	0.0083
6	GO:0048280	vesicle fusion with Golgi apparatus	6	1	0.02	0.0166
7	GO:0034551	mitochondrial respiratory chain complex ...	6	1	0.02	0.0166
8	GO:0015074	DNA integration	359	4	1	0.0172
9	GO:0045454	cell redox homeostasis	98	2	0.27	0.0302
10	GO:0006952	defense response	13	1	0.04	0.0355
11	GO:0006383	transcription from RNA polymerase III pr...	16	1	0.04	0.0435
12	GO:0006397	mRNA processing	142	2	0.39	0.0590
13	GO:0007169	transmembrane receptor protein tyrosine ...	25	1	0.07	0.0672
14	GO:0042147	retrograde transport, endosome to Golgi	28	1	0.08	0.0750
15	GO:0006364	rRNA processing	46	1	0.13	0.1203
16	GO:0006352	DNA-templated transcription, initiation	62	1	0.17	0.1587
17	GO:0006836	neurotransmitter transport	86	1	0.24	0.2133
18	GO:0006468	protein phosphorylation	871	4	2.42	0.2212
19	GO:0006886	intracellular protein transport	331	2	0.92	0.2342
20	GO:0006351	transcription, DNA-templated	943	3	2.62	0.3422
21	GO:0016311	dephosphorylation	164	1	0.46	0.3679
22	GO:0006418	tRNA aminoacylation for protein translat...	212	3	0.59	0.3927
23	GO:0016192	vesicle-mediated transport	296	3	0.82	0.4072
24	GO:0006313	transposition, DNA-mediated	199	1	0.55	0.4272
25	GO:0006810	transport	2608	14	7.24	0.7653
26	GO:0006508	proteolysis	1020	3	2.83	0.7676
27	GO:0006355	regulation of transcription, DNA-templat...	747	1	2.07	0.8814
28	GO:0007165	signal transduction	1420	2	3.94	0.9722
29	GO:0055114	oxidation-reduction process	1668	1	4.63	0.9927
30	GO:0006520	cellular amino acid metabolic process	429	3	1.19	1.0000
31	GO:0019725	cellular homeostasis	118	2	0.33	1.0000
32	GO:1901575	organic substance catabolic process	504	1	1.4	1.0000
33	GO:1901576	organic substance biosynthetic process	2793	6	7.76	1.0000
34	GO:0051716	cellular response to stimulus	1696	2	4.71	1.0000
35	GO:0044281	small molecule metabolic process	1237	3	3.44	1.0000
36	GO:0071822	protein complex subunit organization	162	1	0.45	1.0000
37	GO:1903506	regulation of nucleic acid-templated tra...	747	1	2.07	1.0000
38	GO:0006807	nitrogen compound metabolic process	6768	19	18.8	1.0000
39	GO:0022607	cellular component assembly	230	1	0.64	1.0000
40	GO:0051252	regulation of RNA metabolic process	749	1	2.08	1.0000
41	GO:0071702	organic substance transport	680	2	1.89	1.0000

## Sheet: Module 2
	GO.ID	Term	Annotated	Significant	Expected	Fisher
1	GO:0015074	DNA integration	359	7	1.29	0.00028
2	GO:0043087	regulation of GTPase activity	36	3	0.13	0.00029
3	GO:0010923	negative regulation of phosphatase activ...	3	1	0.01	0.01073
4	GO:0008203	cholesterol metabolic process	5	1	0.02	0.01782
5	GO:0042128	nitrate assimilation	5	1	0.02	0.01782
6	GO:0007033	vacuole organization	6	1	0.02	0.02135
7	GO:0007009	plasma membrane organization	6	1	0.02	0.02135
8	GO:0015914	phospholipid transport	11	1	0.04	0.03880
9	GO:0034314	Arp2/3 complex-mediated actin nucleation	12	1	0.04	0.04226
10	GO:0006952	defense response	13	1	0.05	0.04570
11	GO:0006260	DNA replication	236	3	0.85	0.05270
12	GO:0051301	cell division	16	1	0.06	0.05595
13	GO:0007018	microtubule-based movement	119	2	0.43	0.06805
14	GO:0016042	lipid catabolic process	20	1	0.07	0.06945
15	GO:0007059	chromosome segregation	25	1	0.09	0.08606
16	GO:0006298	mismatch repair	25	1	0.09	0.08606
17	GO:0000723	telomere maintenance	28	1	0.1	0.09588
18	GO:0018342	protein prenylation	28	1	0.1	0.09588
19	GO:0006915	apoptotic process	32	1	0.11	0.10882
20	GO:0001522	pseudouridine synthesis	45	1	0.16	0.14963
21	GO:0016311	dephosphorylation	164	3	0.59	0.17190
22	GO:0006508	proteolysis	1020	6	3.66	0.17850
23	GO:0006357	regulation of transcription from RNA pol...	62	1	0.22	0.20024
24	GO:0007165	signal transduction	1420	6	5.1	0.21884
25	GO:0045454	cell redox homeostasis	98	1	0.35	0.29786
26	GO:0006470	protein dephosphorylation	107	1	0.38	0.32038
27	GO:0006310	DNA recombination	308	2	1.11	0.32384
28	GO:0006886	intracellular protein transport	331	2	1.19	0.33402
29	GO:0006511	ubiquitin-dependent protein catabolic pr...	153	1	0.55	0.42485
30	GO:0006812	cation transport	413	2	1.48	0.43895
31	GO:0006313	transposition, DNA-mediated	199	1	0.71	0.51352
32	GO:0006281	DNA repair	260	2	0.93	0.56712
33	GO:0006468	protein phosphorylation	871	3	3.13	0.61242
34	GO:0016192	vesicle-mediated transport	296	1	1.06	0.65883
35	GO:0006355	regulation of transcription, DNA-templat...	747	3	2.68	0.70433
36	GO:0008152	metabolic process	10111	35	36.3	0.72459
37	GO:0006396	RNA processing	504	1	1.81	0.84186
38	GO:0035556	intracellular signal transduction	538	1	1.93	0.86069
39	GO:0055114	oxidation-reduction process	1668	4	5.99	0.86390
40	GO:0055085	transmembrane transport	1139	1	4.09	0.98592
41	GO:0015748	organophosphate ester transport	11	1	0.04	1.00000
42	GO:0071822	protein complex subunit organization	162	1	0.58	1.00000
43	GO:0032970	regulation of actin filament-based proce...	18	1	0.06	1.00000
44	GO:0032271	regulation of protein polymerization	18	1	0.06	1.00000
45	GO:0050789	regulation of biological process	2389	12	8.58	1.00000
46	GO:0032273	positive regulation of protein polymeriz...	16	1	0.06	1.00000
47	GO:0008150	biological_process	14763	53	53	1.00000
48	GO:0051234	establishment of localization	2616	5	9.39	1.00000
49	GO:0030041	actin filament polymerization	18	1	0.06	1.00000
50	GO:1901615	organic hydroxy compound metabolic proce...	60	1	0.22	1.00000
51	GO:0006810	transport	2608	5	9.36	1.00000
52	GO:0008154	actin polymerization or depolymerization	20	1	0.07	1.00000
53	GO:0006811	ion transport	865	3	3.11	1.00000

## Sheet: Module 3
	GO.ID	Term	Annotated	Significant	Expected	Fisher
1	GO:0016192	vesicle-mediated transport	296	27	5.39	1.2e-09
2	GO:0006886	intracellular protein transport	331	29	6.03	1.8e-08
3	GO:0006614	SRP-dependent cotranslational protein ta...	25	7	0.46	2.2e-07
4	GO:0015031	protein transport	397	36	7.23	0.00011
5	GO:0006303	double-strand break repair via nonhomolo...	6	3	0.11	0.00011
6	GO:0006457	protein folding	134	10	2.44	0.00017
7	GO:0006435	threonyl-tRNA aminoacylation	5	2	0.09	0.00319
8	GO:0006338	chromatin remodeling	7	2	0.13	0.00654
9	GO:0006810	transport	2608	73	47.52	0.00905
10	GO:0006415	translational termination	24	3	0.44	0.00912
11	GO:0006529	asparagine biosynthetic process	9	2	0.16	0.01094
12	GO:0009116	nucleoside metabolic process	95	5	1.73	0.01199
13	GO:0006433	prolyl-tRNA aminoacylation	10	2	0.18	0.01352
14	GO:0006434	seryl-tRNA aminoacylation	10	2	0.18	0.01352
15	GO:0006420	arginyl-tRNA aminoacylation	10	2	0.18	0.01352
16	GO:0006888	ER to Golgi vesicle-mediated transport	28	3	0.51	0.01400
17	GO:0006891	intra-Golgi vesicle-mediated transport	23	3	0.42	0.01623
18	GO:0018149	peptide cross-linking	11	2	0.2	0.01632
19	GO:0007029	endoplasmic reticulum organization	1	1	0.02	0.01822
20	GO:0006422	aspartyl-tRNA aminoacylation	1	1	0.02	0.01822
21	GO:0006164	purine nucleotide biosynthetic process	155	5	2.82	0.02962
22	GO:0006334	nucleosome assembly	15	2	0.27	0.02971
23	GO:0006413	translational initiation	39	3	0.71	0.03376
24	GO:0051090	regulation of DNA binding transcription ...	2	1	0.04	0.03611
25	GO:0016075	rRNA catabolic process	2	1	0.04	0.03611
26	GO:0032469	endoplasmic reticulum calcium ion homeos...	2	1	0.04	0.03611
27	GO:0006465	signal peptide processing	2	1	0.04	0.03611
28	GO:0006597	spermine biosynthetic process	2	1	0.04	0.03611
29	GO:0008295	spermidine biosynthetic process	2	1	0.04	0.03611
30	GO:0006744	ubiquinone biosynthetic process	17	2	0.31	0.03758
31	GO:0016573	histone acetylation	18	2	0.33	0.04177
32	GO:0009298	GDP-mannose biosynthetic process	18	2	0.33	0.04177
33	GO:0006438	valyl-tRNA aminoacylation	19	2	0.35	0.04614
34	GO:0000103	sulfate assimilation	4	1	0.07	0.07092
35	GO:0006730	one-carbon metabolic process	25	2	0.46	0.07543
36	GO:0000398	mRNA splicing, via spliceosome	77	4	1.4	0.08501
37	GO:0006493	protein O-linked glycosylation	5	1	0.09	0.08786
38	GO:0030261	chromosome condensation	5	1	0.09	0.08786
39	GO:0006518	peptide metabolic process	789	29	14.38	0.09909
40	GO:0007030	Golgi organization	6	1	0.11	0.10448
41	GO:0048280	vesicle fusion with Golgi apparatus	6	1	0.11	0.10448
42	GO:0006486	protein glycosylation	70	4	1.28	0.11427
43	GO:0019236	response to pheromone	7	1	0.13	0.12081
44	GO:0006424	glutamyl-tRNA aminoacylation	7	1	0.13	0.12081
45	GO:0006904	vesicle docking involved in exocytosis	35	2	0.64	0.13318
46	GO:0046854	phosphatidylinositol phosphorylation	37	2	0.67	0.14569
47	GO:0007049	cell cycle	117	4	2.13	0.15208
48	GO:0006177	GMP biosynthetic process	10	1	0.18	0.16802
49	GO:0043248	proteasome assembly	10	1	0.18	0.16802
50	GO:0046855	inositol phosphate dephosphorylation	11	1	0.2	0.18319
51	GO:0016485	protein processing	14	2	0.26	0.19745
52	GO:0000042	protein targeting to Golgi	12	1	0.22	0.19809
53	GO:0006368	transcription elongation from RNA polyme...	13	1	0.24	0.21271
54	GO:0006351	transcription, DNA-templated	943	19	17.18	0.21634
55	GO:0032012	regulation of ARF protein signal transdu...	15	1	0.27	0.24117
56	GO:0022904	respiratory electron transport chain	15	1	0.27	0.24117
57	GO:0006777	Mo-molybdopterin cofactor biosynthetic p...	15	1	0.27	0.24117
58	GO:0006383	transcription from RNA polymerase III pr...	16	1	0.29	0.25501
59	GO:0009165	nucleotide biosynthetic process	248	8	4.52	0.26154
60	GO:0006869	lipid transport	98	3	1.79	0.26480
61	GO:0045454	cell redox homeostasis	98	3	1.79	0.26480
62	GO:0006013	mannose metabolic process	17	1	0.31	0.26860
63	GO:0006751	glutathione catabolic process	18	1	0.33	0.28194
64	GO:0015937	coenzyme A biosynthetic process	19	1	0.35	0.29504
65	GO:0016579	protein deubiquitination	105	3	1.91	0.29952
66	GO:0000245	spliceosomal complex assembly	20	1	0.36	0.30790
67	GO:0035023	regulation of Rho protein signal transdu...	108	3	1.97	0.31449
68	GO:1901137	carbohydrate derivative biosynthetic pro...	294	11	5.36	0.31547
69	GO:0006139	nucleobase-containing compound metabolic...	3383	70	61.64	0.32316
70	GO:0009058	biosynthetic process	2947	72	53.7	0.36708
71	GO:0006432	phenylalanyl-tRNA aminoacylation	25	1	0.46	0.36879
72	GO:0006914	autophagy	25	1	0.46	0.36879
73	GO:0006418	tRNA aminoacylation for protein translat...	212	16	3.86	0.37264
74	GO:0006464	cellular protein modification process	1466	31	26.71	0.37556
75	GO:0016570	histone modification	45	3	0.82	0.38972
76	GO:0007156	homophilic cell adhesion via plasma memb...	27	1	0.49	0.39162
77	GO:0006950	response to stress	401	7	7.31	0.40627
78	GO:0007155	cell adhesion	106	3	1.93	0.42254
79	GO:0006506	GPI anchor biosynthetic process	32	1	0.58	0.44516
80	GO:0006508	proteolysis	1020	21	18.59	0.47142
81	GO:0000413	protein peptidyl-prolyl isomerization	36	1	0.66	0.48460
82	GO:0042254	ribosome biogenesis	90	2	1.64	0.49035
83	GO:0006511	ubiquitin-dependent protein catabolic pr...	153	3	2.79	0.53035
84	GO:0030036	actin cytoskeleton organization	42	1	0.77	0.53857
85	GO:0000278	mitotic cell cycle	43	1	0.78	0.54701
86	GO:0006812	cation transport	413	4	7.53	0.55290
87	GO:0001522	pseudouridine synthesis	45	1	0.82	0.56341
88	GO:0016311	dephosphorylation	164	3	2.99	0.57160
89	GO:0008272	sulfate transport	54	1	0.98	0.63021
90	GO:0006414	translational elongation	54	1	0.98	0.63021
91	GO:0019752	carboxylic acid metabolic process	607	19	11.06	0.66341
92	GO:0006352	DNA-templated transcription, initiation	62	1	1.13	0.68099
93	GO:0006357	regulation of transcription from RNA pol...	62	1	1.13	0.68099
94	GO:0006355	regulation of transcription, DNA-templat...	747	13	13.61	0.70162
95	GO:0006313	transposition, DNA-mediated	199	3	3.63	0.70637
96	GO:0007264	small GTPase mediated signal transductio...	221	5	4.03	0.76083
97	GO:0009190	cyclic nucleotide biosynthetic process	85	1	1.55	0.79145
98	GO:0006836	neurotransmitter transport	86	1	1.57	0.79528
99	GO:0006629	lipid metabolic process	449	5	8.18	0.80724
100	GO:0006468	protein phosphorylation	871	13	15.87	0.80861
101	GO:0006811	ion transport	865	8	15.76	0.82517
102	GO:0006470	protein dephosphorylation	107	1	1.95	0.86121
103	GO:0009152	purine ribonucleotide biosynthetic proce...	140	3	2.55	0.86966
104	GO:0006396	RNA processing	504	8	9.18	0.87588
105	GO:0035556	intracellular signal transduction	538	8	9.8	0.91832
106	GO:0006260	DNA replication	236	2	4.3	0.93137
107	GO:0007165	signal transduction	1420	14	25.87	0.93299
108	GO:0007166	cell surface receptor signaling pathway	171	1	3.12	0.95770
109	GO:0015074	DNA integration	359	3	6.54	0.96120
110	GO:0006412	translation	737	26	13.43	0.97430
111	GO:0055085	transmembrane transport	1139	13	20.75	0.97764
112	GO:0006281	DNA repair	260	4	4.74	0.98711
113	GO:0030001	metal ion transport	257	1	4.68	0.99150
114	GO:0008152	metabolic process	10111	158	184.23	0.99745
115	GO:0007186	G-protein coupled receptor signaling pat...	397	1	7.23	0.99939
116	GO:0005975	carbohydrate metabolic process	736	3	13.41	0.99995
117	GO:0055114	oxidation-reduction process	1668	6	30.39	1.00000
118	GO:0048878	chemical homeostasis	32	1	0.58	1.00000
119	GO:0033865	nucleoside bisphosphate metabolic proces...	27	1	0.49	1.00000
120	GO:0034067	protein localization to Golgi apparatus	12	1	0.22	1.00000
121	GO:0033866	nucleoside bisphosphate biosynthetic pro...	19	1	0.35	1.00000
122	GO:0071545	inositol phosphate catabolic process	11	1	0.2	1.00000
123	GO:0006575	cellular modified amino acid metabolic p...	56	1	1.02	1.00000
124	GO:0007265	Ras protein signal transduction	124	4	2.26	1.00000
125	GO:0006576	cellular biogenic amine metabolic proces...	30	1	0.55	1.00000
126	GO:0007266	Rho protein signal transduction	109	3	1.99	1.00000
127	GO:0046164	alcohol catabolic process	13	1	0.24	1.00000
128	GO:0032196	transposition	199	3	3.63	1.00000
129	GO:0060255	regulation of macromolecule metabolic pr...	839	13	15.29	1.00000
130	GO:0042157	lipoprotein metabolic process	37	1	0.67	1.00000
131	GO:0042158	lipoprotein biosynthetic process	33	1	0.6	1.00000
132	GO:0051716	cellular response to stimulus	1696	18	30.9	1.00000
133	GO:0006397	mRNA processing	142	4	2.59	1.00000
134	GO:0006520	cellular amino acid metabolic process	429	18	7.82	1.00000
135	GO:0006399	tRNA metabolic process	363	16	6.61	1.00000
136	GO:1901661	quinone metabolic process	18	2	0.33	1.00000
137	GO:1901663	quinone biosynthetic process	18	2	0.33	1.00000
138	GO:0042180	cellular ketone metabolic process	25	2	0.46	1.00000
139	GO:0045333	cellular respiration	39	1	0.71	1.00000
140	GO:0031323	regulation of cellular metabolic process	806	13	14.69	1.00000
141	GO:0042181	ketone biosynthetic process	18	2	0.33	1.00000
142	GO:0006528	asparagine metabolic process	9	2	0.16	1.00000
143	GO:0010256	endomembrane system organization	13	2	0.24	1.00000
144	GO:0009260	ribonucleotide biosynthetic process	144	3	2.62	1.00000
145	GO:0031326	regulation of cellular biosynthetic proc...	773	13	14.09	1.00000
146	GO:0022406	membrane docking	42	2	0.77	1.00000
147	GO:0006259	DNA metabolic process	1094	12	19.93	1.00000
148	GO:0030163	protein catabolic process	190	3	3.46	1.00000
149	GO:0043170	macromolecule metabolic process	5825	110	106.14	1.00000
150	GO:0043043	peptide biosynthetic process	763	26	13.9	1.00000
151	GO:0043171	peptide catabolic process	18	1	0.33	1.00000
152	GO:0051603	proteolysis involved in cellular protein...	180	3	3.28	1.00000
153	GO:1901657	glycosyl compound metabolic process	95	5	1.73	1.00000
154	GO:0051604	protein maturation	26	2	0.47	1.00000
155	GO:1901659	glycosyl compound biosynthetic process	35	1	0.64	1.00000
156	GO:0018393	internal peptidyl-lysine acetylation	24	2	0.44	1.00000
157	GO:0018394	peptidyl-lysine acetylation	24	2	0.44	1.00000
158	GO:0045184	establishment of protein localization	405	36	7.38	1.00000
159	GO:0045017	glycerolipid biosynthetic process	36	1	0.66	1.00000
160	GO:0033875	ribonucleoside bisphosphate metabolic pr...	27	1	0.49	1.00000
161	GO:0009259	ribonucleotide metabolic process	242	3	4.41	1.00000
162	GO:0030029	actin filament-based process	42	1	0.77	1.00000
163	GO:0043038	amino acid activation	219	16	3.99	1.00000
164	GO:0043039	tRNA aminoacylation	219	16	3.99	1.00000
165	GO:0046174	polyol catabolic process	13	1	0.24	1.00000
166	GO:0006091	generation of precursor metabolites and ...	144	1	2.62	1.00000
167	GO:0045047	protein targeting to ER	25	7	0.46	1.00000
168	GO:0072503	cellular divalent inorganic cation homeo...	3	1	0.05	1.00000
169	GO:0006366	transcription from RNA polymerase II pro...	95	2	1.73	1.00000
170	GO:0006401	RNA catabolic process	50	1	0.91	1.00000
171	GO:0072507	divalent inorganic cation homeostasis	3	1	0.05	1.00000
172	GO:0070085	glycosylation	72	4	1.31	1.00000
173	GO:0046834	lipid phosphorylation	37	2	0.67	1.00000
174	GO:0000375	RNA splicing, via transesterification re...	77	4	1.4	1.00000
175	GO:0090150	establishment of protein localization to...	33	7	0.6	1.00000
176	GO:0000377	RNA splicing, via transesterification re...	77	4	1.4	1.00000
177	GO:0046838	phosphorylated carbohydrate dephosphoryl...	11	1	0.2	1.00000
178	GO:0046037	GMP metabolic process	10	1	0.18	1.00000
179	GO:0046128	purine ribonucleoside metabolic process	41	1	0.75	1.00000
180	GO:0006354	DNA-templated transcription, elongation	17	1	0.31	1.00000
181	GO:0046129	purine ribonucleoside biosynthetic proce...	31	1	0.56	1.00000
182	GO:0023051	regulation of signaling	190	4	3.46	1.00000
183	GO:0023052	signaling	1433	14	26.11	1.00000
184	GO:0019438	aromatic compound biosynthetic process	1353	29	24.65	1.00000
185	GO:0008380	RNA splicing	94	4	1.71	1.00000
186	GO:0019439	aromatic compound catabolic process	107	1	1.95	1.00000
187	GO:0008215	spermine metabolic process	2	1	0.04	1.00000
188	GO:0008216	spermidine metabolic process	2	1	0.04	1.00000
189	GO:0032011	ARF protein signal transduction	15	1	0.27	1.00000
190	GO:1901135	carbohydrate derivative metabolic proces...	622	15	11.33	1.00000
191	GO:0032984	macromolecular complex disassembly	41	3	0.75	1.00000
192	GO:0009225	nucleotide-sugar metabolic process	24	2	0.44	1.00000
193	GO:0009226	nucleotide-sugar biosynthetic process	20	2	0.36	1.00000
194	GO:0097164	ammonium ion metabolic process	10	1	0.18	1.00000
195	GO:0034660	ncRNA metabolic process	417	17	7.6	1.00000
196	GO:0034661	ncRNA catabolic process	2	1	0.04	1.00000
197	GO:0043933	macromolecular complex subunit organizat...	237	7	4.32	1.00000
198	GO:0051252	regulation of RNA metabolic process	749	13	13.65	1.00000
199	GO:0043623	cellular protein complex assembly	98	1	1.79	1.00000
200	GO:1901615	organic hydroxy compound metabolic proce...	60	1	1.09	1.00000
201	GO:0043624	cellular protein complex disassembly	28	3	0.51	1.00000
202	GO:1901616	organic hydroxy compound catabolic proce...	13	1	0.24	1.00000
203	GO:0034030	ribonucleoside bisphosphate biosynthetic...	19	1	0.35	1.00000
204	GO:0072348	sulfur compound transport	55	1	1	1.00000
205	GO:0090174	organelle membrane fusion	6	1	0.11	1.00000
206	GO:0034032	purine nucleoside bisphosphate metabolic...	27	1	0.49	1.00000
207	GO:0034033	purine nucleoside bisphosphate biosynthe...	19	1	0.35	1.00000
208	GO:0050896	response to stimulus	1832	21	33.38	1.00000
209	GO:0006066	alcohol metabolic process	51	1	0.93	1.00000
210	GO:0072330	monocarboxylic acid biosynthetic process	30	2	0.55	1.00000
211	GO:0006996	organelle organization	388	12	7.07	1.00000
212	GO:0034654	nucleobase-containing compound biosynthe...	1242	29	22.63	1.00000
213	GO:0034655	nucleobase-containing compound catabolic...	93	1	1.69	1.00000
214	GO:0033036	macromolecule localization	527	39	9.6	1.00000
215	GO:0090304	nucleic acid metabolic process	2819	55	51.37	1.00000
216	GO:0006505	GPI anchor metabolic process	32	1	0.58	1.00000
217	GO:0005996	monosaccharide metabolic process	87	1	1.59	1.00000
218	GO:0071822	protein complex subunit organization	162	4	2.95	1.00000
219	GO:0006323	DNA packaging	20	3	0.36	1.00000
220	GO:0071824	protein-DNA complex subunit organization	29	2	0.53	1.00000
221	GO:0006325	chromatin organization	70	7	1.28	1.00000
222	GO:0071826	ribonucleoprotein complex subunit organi...	46	1	0.84	1.00000
223	GO:0009247	glycolipid biosynthetic process	32	1	0.58	1.00000
224	GO:0070972	protein localization to endoplasmic reti...	26	7	0.47	1.00000
225	GO:0019222	regulation of metabolic process	853	13	15.54	1.00000
226	GO:0019538	protein metabolic process	3136	76	57.14	1.00000
227	GO:0009066	aspartate family amino acid metabolic pr...	31	2	0.56	1.00000
228	GO:0009067	aspartate family amino acid biosynthetic...	24	2	0.44	1.00000
229	GO:0051276	chromosome organization	176	8	3.21	1.00000
230	GO:0006310	DNA recombination	308	3	5.61	1.00000
231	GO:0043647	inositol phosphate metabolic process	12	1	0.22	1.00000
232	GO:0030003	cellular cation homeostasis	10	1	0.18	1.00000
233	GO:0006082	organic acid metabolic process	615	19	11.21	1.00000
234	GO:0140056	organelle localization by membrane tethe...	42	2	0.77	1.00000
235	GO:0018193	peptidyl-amino acid modification	95	3	1.73	1.00000
236	GO:0006887	exocytosis	54	2	0.98	1.00000
237	GO:0042592	homeostatic process	160	4	2.92	1.00000
238	GO:0032940	secretion by cell	59	2	1.08	1.00000
239	GO:0044106	cellular amine metabolic process	34	1	0.62	1.00000
240	GO:0043632	modification-dependent macromolecule cat...	153	3	2.79	1.00000
241	GO:0009056	catabolic process	536	7	9.77	1.00000
242	GO:0009057	macromolecule catabolic process	275	4	5.01	1.00000
243	GO:0019219	regulation of nucleobase-containing comp...	755	13	13.76	1.00000
244	GO:0071840	cellular component organization or bioge...	698	19	12.72	1.00000
245	GO:0009059	macromolecule biosynthetic process	2072	52	37.75	1.00000
246	GO:0006873	cellular ion homeostasis	11	1	0.2	1.00000
247	GO:0006874	cellular calcium ion homeostasis	3	1	0.05	1.00000
248	GO:0010876	lipid localization	103	3	1.88	1.00000
249	GO:0006875	cellular metal ion homeostasis	10	1	0.18	1.00000
250	GO:0042451	purine nucleoside biosynthetic process	31	1	0.56	1.00000
251	GO:0034622	cellular macromolecular complex assembly	161	4	2.93	1.00000
252	GO:0006163	purine nucleotide metabolic process	260	5	4.74	1.00000
253	GO:0016050	vesicle organization	6	1	0.11	1.00000
254	GO:0042455	ribonucleoside biosynthetic process	35	1	0.64	1.00000
255	GO:0097659	nucleic acid-templated transcription	943	19	17.18	1.00000
256	GO:0046903	secretion	83	2	1.51	1.00000
257	GO:0016053	organic acid biosynthetic process	130	2	2.37	1.00000
258	GO:0046467	membrane lipid biosynthetic process	34	1	0.62	1.00000
259	GO:0008150	biological_process	14763	269	269	1.00000
260	GO:0009889	regulation of biosynthetic process	773	13	14.09	1.00000
261	GO:0046907	intracellular transport	390	29	7.11	1.00000
262	GO:0031497	chromatin assembly	15	2	0.27	1.00000
263	GO:0006820	anion transport	216	1	3.94	1.00000
264	GO:0006333	chromatin assembly or disassembly	16	2	0.29	1.00000
265	GO:0007154	cell communication	1433	14	26.11	1.00000
266	GO:0016310	phosphorylation	1029	15	18.75	1.00000
267	GO:1901564	organonitrogen compound metabolic proces...	4026	90	73.36	1.00000
268	GO:1901565	organonitrogen compound catabolic proces...	292	4	5.32	1.00000
269	GO:1901566	organonitrogen compound biosynthetic pro...	1325	40	24.14	1.00000

## Sheet: Module 4
	GO.ID	Term	Annotated	Significant	Expected	Fisher
1	GO:0015936	coenzyme A metabolic process	26	5	0.42	5.1e-05
2	GO:0006468	protein phosphorylation	871	30	13.98	6.4e-05
3	GO:0032012	regulation of ARF protein signal transdu...	15	4	0.24	7.7e-05
4	GO:0007165	signal transduction	1420	39	22.8	0.00033
5	GO:0006546	glycine catabolic process	10	3	0.16	0.00045
6	GO:0032968	positive regulation of transcription elo...	3	2	0.05	0.00076
7	GO:0008299	isoprenoid biosynthetic process	41	4	0.66	0.00412
8	GO:0006979	response to oxidative stress	52	4	0.83	0.00960
9	GO:0019752	carboxylic acid metabolic process	607	19	9.74	0.01509
10	GO:0042274	ribosomal small subunit biogenesis	3	2	0.05	0.01599
11	GO:0008219	cell death	33	2	0.53	0.01602
12	GO:0007186	G-protein coupled receptor signaling pat...	397	13	6.37	0.02328
13	GO:0006810	transport	2608	39	41.87	0.02351
14	GO:0000462	maturation of SSU-rRNA from tricistronic...	2	1	0.03	0.03185
15	GO:0000469	cleavage involved in rRNA processing	2	1	0.03	0.03185
16	GO:0032469	endoplasmic reticulum calcium ion homeos...	2	1	0.03	0.03185
17	GO:0046654	tetrahydrofolate biosynthetic process	2	1	0.03	0.03185
18	GO:0006367	transcription initiation from RNA polyme...	18	2	0.29	0.03316
19	GO:0005991	trehalose metabolic process	20	2	0.32	0.04033
20	GO:0006564	L-serine biosynthetic process	3	1	0.05	0.04740
21	GO:0006423	cysteinyl-tRNA aminoacylation	3	1	0.05	0.04740
22	GO:0006629	lipid metabolic process	449	10	7.21	0.04951
23	GO:0006750	glutathione biosynthetic process	25	2	0.4	0.06045
24	GO:0042255	ribosome assembly	4	1	0.06	0.06269
25	GO:0006888	ER to Golgi vesicle-mediated transport	28	2	0.45	0.07385
26	GO:0006430	lysyl-tRNA aminoacylation	5	1	0.08	0.07774
27	GO:0006436	tryptophanyl-tRNA aminoacylation	5	1	0.08	0.07774
28	GO:0007030	Golgi organization	6	1	0.1	0.09255
29	GO:0006000	fructose metabolic process	7	1	0.11	0.10713
30	GO:0001678	cellular glucose homeostasis	7	1	0.11	0.10713
31	GO:0007218	neuropeptide signaling pathway	7	1	0.11	0.10713
32	GO:0070481	nuclear-transcribed mRNA catabolic proce...	8	1	0.13	0.12147
33	GO:0071025	RNA surveillance	8	1	0.13	0.12147
34	GO:0070966	nuclear-transcribed mRNA catabolic proce...	8	1	0.13	0.12147
35	GO:0006024	glycosaminoglycan biosynthetic process	8	1	0.13	0.12147
36	GO:0042254	ribosome biogenesis	90	6	1.44	0.13186
37	GO:0006508	proteolysis	1020	20	16.37	0.14218
38	GO:0006368	transcription elongation from RNA polyme...	13	3	0.21	0.14832
39	GO:0006433	prolyl-tRNA aminoacylation	10	1	0.16	0.14946
40	GO:0010508	positive regulation of autophagy	10	1	0.16	0.14946
41	GO:0034968	histone lysine methylation	11	1	0.18	0.16313
42	GO:0015914	phospholipid transport	11	1	0.18	0.16313
43	GO:0046835	carbohydrate phosphorylation	11	1	0.18	0.16313
44	GO:0007178	transmembrane receptor protein serine/th...	13	1	0.21	0.18980
45	GO:0009116	nucleoside metabolic process	95	3	1.53	0.19609
46	GO:0016485	protein processing	14	1	0.22	0.20282
47	GO:0006002	fructose 6-phosphate metabolic process	15	1	0.24	0.21563
48	GO:0042981	regulation of apoptotic process	16	1	0.26	0.22823
49	GO:0006744	ubiquinone biosynthetic process	17	1	0.27	0.24064
50	GO:0002098	tRNA wobble uridine modification	17	1	0.27	0.24064
51	GO:0009298	GDP-mannose biosynthetic process	18	1	0.29	0.25284
52	GO:0006438	valyl-tRNA aminoacylation	19	1	0.31	0.26485
53	GO:0006839	mitochondrial transport	20	1	0.32	0.27667
54	GO:0055085	transmembrane transport	1139	21	18.29	0.28534
55	GO:0006096	glycolytic process	68	2	1.09	0.29824
56	GO:0006325	chromatin organization	70	3	1.12	0.33150
57	GO:0007169	transmembrane receptor protein tyrosine ...	25	1	0.4	0.33298
58	GO:0055114	oxidation-reduction process	1668	29	26.78	0.33911
59	GO:0018342	protein prenylation	28	1	0.45	0.36464
60	GO:0009253	peptidoglycan catabolic process	29	1	0.47	0.37486
61	GO:0006836	neurotransmitter transport	86	2	1.38	0.40290
62	GO:0005978	glycogen biosynthetic process	33	1	0.53	0.41413
63	GO:0016570	histone modification	45	2	0.72	0.42244
64	GO:0000413	protein peptidyl-prolyl isomerization	36	1	0.58	0.44196
65	GO:0006265	DNA topological change	38	1	0.61	0.45977
66	GO:0006413	translational initiation	39	1	0.63	0.46847
67	GO:0006396	RNA processing	504	8	8.09	0.48115
68	GO:0006364	rRNA processing	46	3	0.74	0.49088
69	GO:0016579	protein deubiquitination	105	2	1.69	0.50477
70	GO:0051726	regulation of cell cycle	47	1	0.75	0.53319
71	GO:0006520	cellular amino acid metabolic process	429	12	6.89	0.54038
72	GO:0007166	cell surface receptor signaling pathway	171	4	2.75	0.62974
73	GO:0009058	biosynthetic process	2947	37	47.31	0.64495
74	GO:0006355	regulation of transcription, DNA-templat...	747	12	11.99	0.65398
75	GO:0006139	nucleobase-containing compound metabolic...	3383	45	54.31	0.67554
76	GO:0006486	protein glycosylation	70	1	1.12	0.67875
77	GO:0006030	chitin metabolic process	71	1	1.14	0.68394
78	GO:0000398	mRNA splicing, via spliceosome	77	1	1.24	0.71332
79	GO:0035556	intracellular signal transduction	538	8	8.64	0.72449
80	GO:0006418	tRNA aminoacylation for protein translat...	212	7	3.4	0.75176
81	GO:0006886	intracellular protein transport	331	4	5.31	0.78180
82	GO:0007155	cell adhesion	106	1	1.7	0.82123
83	GO:0008152	metabolic process	10111	162	162.32	0.86970
84	GO:0016192	vesicle-mediated transport	296	4	4.75	0.87509
85	GO:0006457	protein folding	134	1	2.15	0.88679
86	GO:0006351	transcription, DNA-templated	943	14	15.14	0.90681
87	GO:0006511	ubiquitin-dependent protein catabolic pr...	153	1	2.46	0.91701
88	GO:0015074	DNA integration	359	3	5.76	0.93054
89	GO:0006950	response to stress	401	6	6.44	0.97599
90	GO:0005975	carbohydrate metabolic process	736	9	11.82	0.98044
91	GO:0006812	cation transport	413	2	6.63	0.99098
92	GO:0006026	aminoglycan catabolic process	30	1	0.48	1.00000
93	GO:0046700	heterocycle catabolic process	112	1	1.8	1.00000
94	GO:0006027	glycosaminoglycan catabolic process	29	1	0.47	1.00000
95	GO:0042558	pteridine-containing compound metabolic ...	6	1	0.1	1.00000
96	GO:0042559	pteridine-containing compound biosynthet...	6	1	0.1	1.00000
97	GO:0072521	purine-containing compound metabolic pro...	278	7	4.46	1.00000
98	GO:0034660	ncRNA metabolic process	417	11	6.69	1.00000
99	GO:0072524	pyridine-containing compound metabolic p...	110	2	1.77	1.00000
100	GO:0009889	regulation of biosynthetic process	773	12	12.41	1.00000
101	GO:0006811	ion transport	865	3	13.89	1.00000
102	GO:0006412	translation	737	8	11.83	1.00000
103	GO:0006760	folic acid-containing compound metabolic...	6	1	0.1	1.00000
104	GO:0042180	cellular ketone metabolic process	25	1	0.4	1.00000
105	GO:0009396	folic acid-containing compound biosynthe...	6	1	0.1	1.00000
106	GO:0019318	hexose metabolic process	83	1	1.33	1.00000
107	GO:0031323	regulation of cellular metabolic process	806	13	12.94	1.00000
108	GO:0042181	ketone biosynthetic process	18	1	0.29	1.00000
109	GO:0055080	cation homeostasis	22	1	0.35	1.00000
110	GO:0031325	positive regulation of cellular metaboli...	42	3	0.67	1.00000
111	GO:0031326	regulation of cellular biosynthetic proc...	773	12	12.41	1.00000
112	GO:0055082	cellular chemical homeostasis	18	2	0.29	1.00000
113	GO:0070085	glycosylation	72	1	1.16	1.00000
114	GO:0050789	regulation of biological process	2389	55	38.35	1.00000
115	GO:0065003	macromolecular complex assembly	198	1	3.18	1.00000
116	GO:0031328	positive regulation of cellular biosynth...	26	2	0.42	1.00000
117	GO:0009070	serine family amino acid biosynthetic pr...	19	1	0.31	1.00000
118	GO:0031329	regulation of cellular catabolic process	10	1	0.16	1.00000
119	GO:0009071	serine family amino acid catabolic proce...	10	3	0.16	1.00000
120	GO:0006366	transcription from RNA polymerase II pro...	95	3	1.53	1.00000
121	GO:0043170	macromolecule metabolic process	5825	91	93.51	1.00000
122	GO:0055086	nucleobase-containing small molecule met...	474	10	7.61	1.00000
123	GO:0065007	biological regulation	2472	57	39.68	1.00000
124	GO:1902531	regulation of intracellular signal trans...	154	4	2.47	1.00000
125	GO:0065008	regulation of biological quality	195	2	3.13	1.00000
126	GO:0034654	nucleobase-containing compound biosynthe...	1242	15	19.94	1.00000
127	GO:0034655	nucleobase-containing compound catabolic...	93	1	1.49	1.00000
128	GO:0006040	amino sugar metabolic process	74	1	1.19	1.00000
129	GO:0007049	cell cycle	117	1	1.88	1.00000
130	GO:0008033	tRNA processing	144	1	2.31	1.00000
131	GO:0048583	regulation of response to stimulus	196	4	3.15	1.00000
132	GO:0008380	RNA splicing	94	1	1.51	1.00000
133	GO:0006753	nucleoside phosphate metabolic process	413	7	6.63	1.00000
134	GO:0006352	DNA-templated transcription, initiation	62	2	1	1.00000
135	GO:0006354	DNA-templated transcription, elongation	17	3	0.27	1.00000
136	GO:0055074	calcium ion homeostasis	3	1	0.05	1.00000
137	GO:0006757	ATP generation from ADP	68	2	1.09	1.00000
138	GO:1901135	carbohydrate derivative metabolic proces...	622	15	9.99	1.00000
139	GO:1901136	carbohydrate derivative catabolic proces...	56	1	0.9	1.00000
140	GO:1901137	carbohydrate derivative biosynthetic pro...	294	3	4.72	1.00000
141	GO:0006357	regulation of transcription from RNA pol...	62	2	1	1.00000
142	GO:0009100	glycoprotein metabolic process	73	1	1.17	1.00000
143	GO:0009101	glycoprotein biosynthetic process	70	1	1.12	1.00000
144	GO:2001141	regulation of RNA biosynthetic process	747	12	11.99	1.00000
145	GO:0032259	methylation	108	1	1.73	1.00000
146	GO:0043603	cellular amide metabolic process	819	11	13.15	1.00000
147	GO:0043604	amide biosynthetic process	779	11	12.51	1.00000
148	GO:0009108	coenzyme biosynthetic process	90	2	1.44	1.00000
149	GO:0010604	positive regulation of macromolecule met...	32	2	0.51	1.00000
150	GO:0050801	ion homeostasis	23	1	0.37	1.00000
151	GO:0010605	negative regulation of macromolecule met...	76	1	1.22	1.00000
152	GO:1901071	glucosamine-containing compound metaboli...	74	1	1.19	1.00000
153	GO:0045184	establishment of protein localization	405	4	6.5	1.00000
154	GO:0046496	nicotinamide nucleotide metabolic proces...	101	2	1.62	1.00000
155	GO:0019673	GDP-mannose metabolic process	22	1	0.35	1.00000
156	GO:0045893	positive regulation of transcription, DN...	19	2	0.31	1.00000
157	GO:0031331	positive regulation of cellular cataboli...	10	1	0.16	1.00000
158	GO:0048522	positive regulation of cellular process	69	3	1.11	1.00000
159	GO:0016569	covalent chromatin modification	45	2	0.72	1.00000
160	GO:0030163	protein catabolic process	190	1	3.05	1.00000
161	GO:0000270	peptidoglycan metabolic process	30	1	0.48	1.00000
162	GO:1903506	regulation of nucleic acid-templated tra...	747	12	11.99	1.00000
163	GO:0046578	regulation of Ras protein signal transdu...	123	4	1.97	1.00000
164	GO:0000271	polysaccharide biosynthetic process	42	1	0.67	1.00000
165	GO:0043067	regulation of programmed cell death	16	1	0.26	1.00000
166	GO:0010941	regulation of cell death	16	1	0.26	1.00000
167	GO:0010467	gene expression	2239	31	35.94	1.00000
168	GO:1903508	positive regulation of nucleic acid-temp...	19	2	0.31	1.00000
169	GO:0010468	regulation of gene expression	813	13	13.05	1.00000
170	GO:0034622	cellular macromolecular complex assembly	161	1	2.58	1.00000
171	GO:0019222	regulation of metabolic process	853	14	13.69	1.00000
172	GO:0006720	isoprenoid metabolic process	41	4	0.66	1.00000
173	GO:0006725	cellular aromatic compound metabolic pro...	3525	46	56.59	1.00000
174	GO:0048518	positive regulation of biological proces...	74	3	1.19	1.00000
175	GO:0048519	negative regulation of biological proces...	125	1	2.01	1.00000
176	GO:0043933	macromolecular complex subunit organizat...	237	1	3.8	1.00000
177	GO:0034613	cellular protein localization	346	4	5.55	1.00000
178	GO:0006400	tRNA modification	62	1	1	1.00000
179	GO:0044085	cellular component biogenesis	321	6	5.15	1.00000
180	GO:0006401	RNA catabolic process	50	1	0.8	1.00000
181	GO:0006402	mRNA catabolic process	44	1	0.71	1.00000
182	GO:1901360	organic cyclic compound metabolic proces...	3565	46	57.23	1.00000
183	GO:0015980	energy derivation by oxidation of organi...	72	1	1.16	1.00000
184	GO:1901361	organic cyclic compound catabolic proces...	114	1	1.83	1.00000
185	GO:1901362	organic cyclic compound biosynthetic pro...	1395	16	22.39	1.00000
186	GO:0006807	nitrogen compound metabolic process	6768	111	108.65	1.00000
187	GO:0007264	small GTPase mediated signal transductio...	221	4	3.55	1.00000
188	GO:0007265	Ras protein signal transduction	124	4	1.99	1.00000
189	GO:0019219	regulation of nucleobase-containing comp...	755	12	12.12	1.00000
190	GO:0030490	maturation of SSU-rRNA	2	1	0.03	1.00000
191	GO:0008652	cellular amino acid biosynthetic process	103	1	1.65	1.00000
192	GO:0072503	cellular divalent inorganic cation homeo...	3	1	0.05	1.00000
193	GO:0034641	cellular nitrogen compound metabolic pro...	4129	49	66.29	1.00000
194	GO:0016571	histone methylation	11	1	0.18	1.00000
195	GO:0071826	ribonucleoprotein complex subunit organi...	46	1	0.74	1.00000
196	GO:0042886	amide transport	420	4	6.74	1.00000
197	GO:0034243	regulation of transcription elongation f...	3	2	0.05	1.00000
198	GO:0034645	cellular macromolecule biosynthetic proc...	2063	24	33.12	1.00000
199	GO:0072507	divalent inorganic cation homeostasis	3	1	0.05	1.00000
200	GO:0071103	DNA conformation change	58	1	0.93	1.00000
201	GO:0006743	ubiquinone metabolic process	17	1	0.27	1.00000
202	GO:0010876	lipid localization	103	1	1.65	1.00000
203	GO:0042398	cellular modified amino acid biosyntheti...	35	3	0.56	1.00000
204	GO:0045944	positive regulation of transcription fro...	15	2	0.24	1.00000
205	GO:0018205	peptidyl-lysine modification	42	1	0.67	1.00000
206	GO:0006749	glutathione metabolic process	43	2	0.69	1.00000
207	GO:0051716	cellular response to stimulus	1696	39	27.23	1.00000
208	GO:0018208	peptidyl-proline modification	36	1	0.58	1.00000
209	GO:0000956	nuclear-transcribed mRNA catabolic proce...	38	1	0.61	1.00000
210	GO:0034637	cellular carbohydrate biosynthetic proce...	67	1	1.08	1.00000
211	GO:0006259	DNA metabolic process	1094	4	17.56	1.00000
212	GO:0019637	organophosphate metabolic process	648	7	10.4	1.00000
213	GO:0006732	coenzyme metabolic process	194	9	3.11	1.00000
214	GO:0006733	oxidoreduction coenzyme metabolic proces...	118	3	1.89	1.00000
215	GO:0071840	cellular component organization or bioge...	698	11	11.21	1.00000
216	GO:0046939	nucleotide phosphorylation	82	2	1.32	1.00000
217	GO:0019184	nonribosomal peptide biosynthetic proces...	26	2	0.42	1.00000
218	GO:0046483	heterocycle metabolic process	3536	46	56.77	1.00000
219	GO:0070727	cellular macromolecule localization	346	4	5.55	1.00000
220	GO:0045935	positive regulation of nucleobase-contai...	19	2	0.31	1.00000
221	GO:0090501	RNA phosphodiester bond hydrolysis	8	1	0.13	1.00000
222	GO:0009311	oligosaccharide metabolic process	23	2	0.37	1.00000
223	GO:0036211	protein modification process	1466	37	23.53	1.00000
224	GO:0048878	chemical homeostasis	32	2	0.51	1.00000
225	GO:0051252	regulation of RNA metabolic process	749	12	12.02	1.00000
226	GO:0030203	glycosaminoglycan metabolic process	38	2	0.61	1.00000
227	GO:0006996	organelle organization	388	6	6.23	1.00000
228	GO:0051254	positive regulation of RNA metabolic pro...	19	2	0.31	1.00000
229	GO:0010506	regulation of autophagy	10	1	0.16	1.00000
230	GO:0043412	macromolecule modification	1603	38	25.73	1.00000
231	GO:0046394	carboxylic acid biosynthetic process	130	2	2.09	1.00000
232	GO:0043413	macromolecule glycosylation	70	1	1.12	1.00000
233	GO:0046395	carboxylic acid catabolic process	43	3	0.69	1.00000
234	GO:0043414	macromolecule methylation	71	1	1.14	1.00000
235	GO:0005996	monosaccharide metabolic process	87	1	1.4	1.00000
236	GO:0080090	regulation of primary metabolic process	795	12	12.76	1.00000
237	GO:0018130	heterocycle biosynthetic process	1388	16	22.28	1.00000

## Sheet: Module 5
	GO.ID	Term	Annotated	Significant	Expected	Fisher
1	GO:0006094	gluconeogenesis	20	5	0.17	5.0e-07
2	GO:0046855	inositol phosphate dephosphorylation	11	3	0.09	8.7e-05
3	GO:0048280	vesicle fusion with Golgi apparatus	6	2	0.05	0.00099
4	GO:0046854	phosphatidylinositol phosphorylation	37	3	0.31	0.00349
5	GO:0016567	protein ubiquitination	38	3	0.31	0.00376
6	GO:0007266	Rho protein signal transduction	109	2	0.9	0.00826
7	GO:0006511	ubiquitin-dependent protein catabolic pr...	153	5	1.26	0.00880
8	GO:0006367	transcription initiation from RNA polyme...	18	2	0.15	0.00950
9	GO:0030001	metal ion transport	257	6	2.12	0.01021
10	GO:0006468	protein phosphorylation	871	14	7.2	0.01271
11	GO:0000462	maturation of SSU-rRNA from tricistronic...	2	1	0.02	0.01646
12	GO:0042147	retrograde transport, endosome to Golgi	28	2	0.23	0.02226
13	GO:0009253	peptidoglycan catabolic process	29	2	0.24	0.02378
14	GO:0032968	positive regulation of transcription elo...	3	1	0.02	0.02459
15	GO:0055085	transmembrane transport	1139	16	9.41	0.03394
16	GO:0006351	transcription, DNA-templated	943	9	7.79	0.03431
17	GO:0006836	neurotransmitter transport	86	3	0.71	0.03433
18	GO:0030111	regulation of Wnt signaling pathway	5	1	0.04	0.04065
19	GO:0007165	signal transduction	1420	13	11.73	0.04324
20	GO:0006396	RNA processing	504	7	4.17	0.04858
21	GO:0006886	intracellular protein transport	331	6	2.74	0.05672
22	GO:0016192	vesicle-mediated transport	296	8	2.45	0.07258
23	GO:0043085	positive regulation of catalytic activit...	10	1	0.08	0.07966
24	GO:0015914	phospholipid transport	11	1	0.09	0.08727
25	GO:0034968	histone lysine methylation	11	1	0.09	0.08727
26	GO:0006955	immune response	13	1	0.11	0.10230
27	GO:0016485	protein processing	14	1	0.12	0.10973
28	GO:0007264	small GTPase mediated signal transductio...	221	4	1.83	0.13448
29	GO:0016226	iron-sulfur cluster assembly	18	1	0.15	0.13882
30	GO:0006099	tricarboxylic acid cycle	19	1	0.16	0.14595
31	GO:0006508	proteolysis	1020	15	8.43	0.18396
32	GO:0007169	transmembrane receptor protein tyrosine ...	25	1	0.21	0.18749
33	GO:0006914	autophagy	25	1	0.21	0.18749
34	GO:0018342	protein prenylation	28	1	0.23	0.20750
35	GO:0016579	protein deubiquitination	105	2	0.87	0.21534
36	GO:0006470	protein dephosphorylation	107	2	0.88	0.22141
37	GO:0071805	potassium ion transmembrane transport	35	1	0.29	0.25232
38	GO:0006811	ion transport	865	12	7.15	0.29660
39	GO:0006364	rRNA processing	46	2	0.38	0.30420
40	GO:0006260	DNA replication	236	3	1.95	0.30968
41	GO:0015991	ATP hydrolysis coupled proton transport	45	1	0.37	0.31201
42	GO:0006414	translational elongation	54	1	0.45	0.36168
43	GO:0006486	protein glycosylation	70	1	0.58	0.44136
44	GO:0006030	chitin metabolic process	71	1	0.59	0.44600
45	GO:0008654	phospholipid biosynthetic process	73	1	0.6	0.45516
46	GO:0003333	amino acid transmembrane transport	74	1	0.61	0.45968
47	GO:0045454	cell redox homeostasis	98	1	0.81	0.55777
48	GO:0035023	regulation of Rho protein signal transdu...	108	1	0.89	0.59322
49	GO:0006810	transport	2608	32	21.55	0.63413
50	GO:0006397	mRNA processing	142	1	1.17	0.69396
51	GO:0006281	DNA repair	260	1	2.15	0.88659
52	GO:0006139	nucleobase-containing compound metabolic...	3383	21	27.96	0.92136
53	GO:0005975	carbohydrate metabolic process	736	10	6.08	0.92144
54	GO:0006355	regulation of transcription, DNA-templat...	747	4	6.17	0.92368
55	GO:0007186	G-protein coupled receptor signaling pat...	397	1	3.28	0.96455
56	GO:0019752	carboxylic acid metabolic process	607	2	5.02	0.99282
57	GO:0055114	oxidation-reduction process	1668	7	13.78	0.99305
58	GO:0008152	metabolic process	10111	77	83.56	0.99707
59	GO:0051276	chromosome organization	176	1	1.45	1.00000
60	GO:0048284	organelle fusion	14	2	0.12	1.00000
61	GO:0034660	ncRNA metabolic process	417	2	3.45	1.00000
62	GO:0016569	covalent chromatin modification	45	1	0.37	1.00000
63	GO:0051716	cellular response to stimulus	1696	14	14.02	1.00000
64	GO:0046907	intracellular transport	390	8	3.22	1.00000
65	GO:0030163	protein catabolic process	190	5	1.57	1.00000
66	GO:0009889	regulation of biosynthetic process	773	4	6.39	1.00000
67	GO:0006812	cation transport	413	7	3.41	1.00000
68	GO:0006813	potassium ion transport	98	1	0.81	1.00000
69	GO:0006259	DNA metabolic process	1094	4	9.04	1.00000
70	GO:0046578	regulation of Ras protein signal transdu...	123	1	1.02	1.00000
71	GO:0015992	proton transport	85	1	0.7	1.00000
72	GO:0019318	hexose metabolic process	83	5	0.69	1.00000
73	GO:0019319	hexose biosynthetic process	20	5	0.17	1.00000
74	GO:0006818	hydrogen transport	85	1	0.7	1.00000
75	GO:0051186	cofactor metabolic process	251	1	2.07	1.00000
76	GO:0019438	aromatic compound biosynthetic process	1353	9	11.18	1.00000
77	GO:0051188	cofactor biosynthetic process	148	1	1.22	1.00000
78	GO:0019941	modification-dependent protein catabolic...	153	5	1.26	1.00000
79	GO:0070085	glycosylation	72	1	0.6	1.00000
80	GO:0050896	response to stimulus	1832	15	15.14	1.00000
81	GO:0016070	RNA metabolic process	1760	16	14.54	1.00000
82	GO:0016071	mRNA metabolic process	193	1	1.59	1.00000
83	GO:0033036	macromolecule localization	527	7	4.36	1.00000
84	GO:0016072	rRNA metabolic process	50	2	0.41	1.00000
85	GO:0015849	organic acid transport	120	1	0.99	1.00000
86	GO:0006725	cellular aromatic compound metabolic pro...	3525	21	29.13	1.00000
87	GO:0006996	organelle organization	388	3	3.21	1.00000
88	GO:0034654	nucleobase-containing compound biosynthe...	1242	9	10.26	1.00000
89	GO:0051171	regulation of nitrogen compound metaboli...	795	4	6.57	1.00000
90	GO:0071804	cellular potassium ion transport	35	1	0.29	1.00000
91	GO:0051173	positive regulation of nitrogen compound...	32	1	0.26	1.00000
92	GO:0015711	organic anion transport	133	2	1.1	1.00000
93	GO:0044085	cellular component biogenesis	321	3	2.65	1.00000
94	GO:0051179	localization	2649	32	21.89	1.00000
95	GO:0015833	peptide transport	410	6	3.39	1.00000
96	GO:1901564	organonitrogen compound metabolic proces...	4026	38	33.27	1.00000
97	GO:1901565	organonitrogen compound catabolic proces...	292	7	2.41	1.00000
98	GO:1901566	organonitrogen compound biosynthetic pro...	1325	2	10.95	1.00000
99	GO:0006006	glucose metabolic process	31	5	0.26	1.00000
100	GO:0050790	regulation of catalytic activity	63	1	0.52	1.00000
101	GO:0016570	histone modification	45	1	0.37	1.00000
102	GO:0016571	histone methylation	11	1	0.09	1.00000
103	GO:0042592	homeostatic process	160	1	1.32	1.00000
104	GO:0006464	cellular protein modification process	1466	24	12.11	1.00000
105	GO:0050794	regulation of cellular process	2335	18	19.3	1.00000
106	GO:0043603	cellular amide metabolic process	819	1	6.77	1.00000
107	GO:0043604	amide biosynthetic process	779	1	6.44	1.00000
108	GO:0198738	cell-cell signaling by wnt	32	1	0.26	1.00000
109	GO:0010604	positive regulation of macromolecule met...	32	1	0.26	1.00000
110	GO:0015748	organophosphate ester transport	11	1	0.09	1.00000
111	GO:0071702	organic substance transport	680	8	5.62	1.00000
112	GO:0071704	organic substance metabolic process	7832	70	64.72	1.00000
113	GO:1903825	organic acid transmembrane transport	80	1	0.66	1.00000
114	GO:0071705	nitrogen compound transport	530	7	4.38	1.00000
115	GO:1901071	glucosamine-containing compound metaboli...	74	1	0.61	1.00000
116	GO:0090662	ATP hydrolysis coupled transmembrane tra...	45	1	0.37	1.00000
117	GO:0051234	establishment of localization	2616	32	21.62	1.00000
118	GO:0098660	inorganic ion transmembrane transport	153	2	1.26	1.00000
119	GO:0010467	gene expression	2239	18	18.5	1.00000
120	GO:0010468	regulation of gene expression	813	4	6.72	1.00000
121	GO:0032446	protein modification by small protein co...	45	3	0.37	1.00000
122	GO:0098662	inorganic cation transmembrane transport	152	2	1.26	1.00000

## Sheet: Module 6
	GO.ID	Term	Annotated	Significant	Expected	Fisher
1	GO:1903818	positive regulation of voltage-gated pot...	1	1	0.01	0.0052
2	GO:0007269	neurotransmitter secretion	1	1	0.01	0.0052
3	GO:0030431	sleep	1	1	0.01	0.0052
4	GO:0031110	regulation of microtubule polymerization...	1	1	0.01	0.0052
5	GO:0009405	pathogenesis	1	1	0.01	0.0052
6	GO:0032222	regulation of synaptic transmission, cho...	1	1	0.01	0.0052
7	GO:0007186	G-protein coupled receptor signaling pat...	397	8	2.07	0.0110
8	GO:0016055	Wnt signaling pathway	32	2	0.17	0.0120
9	GO:0006470	protein dephosphorylation	107	3	0.56	0.0184
10	GO:0007016	cytoskeletal anchoring at plasma membran...	5	1	0.03	0.0258
11	GO:0006809	nitric oxide biosynthetic process	5	1	0.03	0.0258
12	GO:0007218	neuropeptide signaling pathway	7	1	0.04	0.0360
13	GO:0032324	molybdopterin cofactor biosynthetic proc...	8	1	0.04	0.0410
14	GO:0055085	transmembrane transport	1139	11	5.94	0.0428
15	GO:0051262	protein tetramerization	9	1	0.05	0.0460
16	GO:0001932	regulation of protein phosphorylation	11	1	0.06	0.0559
17	GO:0007155	cell adhesion	106	3	0.55	0.0627
18	GO:0006541	glutamine metabolic process	13	1	0.07	0.0657
19	GO:0006836	neurotransmitter transport	86	3	0.45	0.0710
20	GO:0006002	fructose 6-phosphate metabolic process	15	1	0.08	0.0755
21	GO:0006071	glycerol metabolic process	17	1	0.09	0.0851
22	GO:0006355	regulation of transcription, DNA-templat...	747	7	3.9	0.0942
23	GO:0015937	coenzyme A biosynthetic process	19	1	0.1	0.0946
24	GO:0046856	phosphatidylinositol dephosphorylation	20	1	0.1	0.0994
25	GO:0007205	protein kinase C-activating G-protein co...	22	1	0.11	0.1087
26	GO:0006302	double-strand break repair	23	1	0.12	0.1134
27	GO:0006811	ion transport	865	8	4.51	0.1212
28	GO:0007169	transmembrane receptor protein tyrosine ...	25	1	0.13	0.1226
29	GO:0007018	microtubule-based movement	119	2	0.62	0.1279
30	GO:0007156	homophilic cell adhesion via plasma memb...	27	1	0.14	0.1318
31	GO:0006904	vesicle docking involved in exocytosis	35	1	0.18	0.1674
32	GO:0000413	protein peptidyl-prolyl isomerization	36	1	0.19	0.1718
33	GO:0070588	calcium ion transmembrane transport	40	1	0.21	0.1890
34	GO:0006364	rRNA processing	46	1	0.24	0.2141
35	GO:0006979	response to oxidative stress	52	1	0.27	0.2385
36	GO:0008272	sulfate transport	54	1	0.28	0.2464
37	GO:0007165	signal transduction	1420	15	7.41	0.2709
38	GO:0006813	potassium ion transport	98	2	0.51	0.2786
39	GO:0019752	carboxylic acid metabolic process	607	3	3.17	0.2989
40	GO:0006096	glycolytic process	68	1	0.35	0.2998
41	GO:0006869	lipid transport	98	1	0.51	0.4020
42	GO:0035556	intracellular signal transduction	538	3	2.81	0.4761
43	GO:0006457	protein folding	134	1	0.7	0.5054
44	GO:0051056	regulation of small GTPase mediated sign...	142	1	0.74	0.5258
45	GO:0006820	anion transport	216	2	1.13	0.5279
46	GO:0006508	proteolysis	1020	5	5.32	0.6221
47	GO:0006313	transposition, DNA-mediated	199	1	1.04	0.6493
48	GO:0006468	protein phosphorylation	871	5	4.54	0.6539
49	GO:0006810	transport	2608	20	13.6	0.7730
50	GO:0006396	RNA processing	504	2	2.63	0.8038
51	GO:0008152	metabolic process	10111	37	52.74	0.9725
52	GO:0055114	oxidation-reduction process	1668	3	8.7	0.9944
53	GO:0031109	microtubule polymerization or depolymeri...	35	1	0.18	1.0000
54	GO:0045185	maintenance of protein location	6	1	0.03	1.0000
55	GO:0046903	secretion	83	2	0.43	1.0000
56	GO:0033043	regulation of organelle organization	41	1	0.21	1.0000
57	GO:0072521	purine-containing compound metabolic pro...	278	3	1.45	1.0000
58	GO:0034660	ncRNA metabolic process	417	1	2.17	1.0000
59	GO:0072522	purine-containing compound biosynthetic ...	167	1	0.87	1.0000
60	GO:0051716	cellular response to stimulus	1696	16	8.85	1.0000
61	GO:0043266	regulation of potassium ion transport	1	1	0.01	1.0000
62	GO:0072524	pyridine-containing compound metabolic p...	110	1	0.57	1.0000
63	GO:0009889	regulation of biosynthetic process	773	7	4.03	1.0000
64	GO:0043268	positive regulation of potassium ion tra...	1	1	0.01	1.0000
65	GO:0006812	cation transport	413	3	2.15	1.0000
66	GO:0043269	regulation of ion transport	1	1	0.01	1.0000
67	GO:0033875	ribonucleoside bisphosphate metabolic pr...	27	1	0.14	1.0000
68	GO:0006259	DNA metabolic process	1094	2	5.71	1.0000
69	GO:0006816	calcium ion transport	45	1	0.23	1.0000
70	GO:0005975	carbohydrate metabolic process	736	2	3.84	1.0000
71	GO:1901068	guanosine-containing compound metabolic ...	33	1	0.17	1.0000
72	GO:0009199	ribonucleoside triphosphate metabolic pr...	139	2	0.72	1.0000
73	GO:0051186	cofactor metabolic process	251	3	1.31	1.0000
74	GO:0043545	molybdopterin cofactor metabolic process	19	1	0.1	1.0000
75	GO:0019438	aromatic compound biosynthetic process	1353	8	7.06	1.0000
76	GO:0051188	cofactor biosynthetic process	148	2	0.77	1.0000
77	GO:0006163	purine nucleotide metabolic process	260	3	1.36	1.0000

## Sheet: Module 7
	GO.ID	Term	Annotated	Significant	Expected	Fisher
1	GO:0031032	actomyosin structure organization	2	1	0.01	0.0085
2	GO:0019343	cysteine biosynthetic process via cystat...	3	1	0.01	0.0127
3	GO:0010923	negative regulation of phosphatase activ...	3	1	0.01	0.0127
4	GO:0009450	gamma-aminobutyric acid catabolic proces...	4	1	0.02	0.0170
5	GO:0015074	DNA integration	359	5	1.53	0.0184
6	GO:0006535	cysteine biosynthetic process from serin...	5	1	0.02	0.0212
7	GO:0039694	viral RNA genome replication	8	1	0.03	0.0336
8	GO:0035556	intracellular signal transduction	538	5	2.3	0.0411
9	GO:0006370	7-methylguanosine mRNA capping	12	1	0.05	0.0500
10	GO:0006313	transposition, DNA-mediated	199	3	0.85	0.0532
11	GO:0006526	arginine biosynthetic process	14	1	0.06	0.0581
12	GO:0007205	protein kinase C-activating G-protein co...	22	1	0.09	0.0899
13	GO:0055114	oxidation-reduction process	1668	11	7.12	0.0937
14	GO:0006750	glutathione biosynthetic process	25	1	0.11	0.1015
15	GO:0000723	telomere maintenance	28	1	0.12	0.1129
16	GO:0018342	protein prenylation	28	1	0.12	0.1129
17	GO:0006072	glycerol-3-phosphate metabolic process	29	1	0.12	0.1167
18	GO:0071805	potassium ion transmembrane transport	35	1	0.15	0.1392
19	GO:0006479	protein methylation	36	1	0.15	0.1428
20	GO:0032259	methylation	108	2	0.46	0.1450
21	GO:0016567	protein ubiquitination	38	1	0.16	0.1502
22	GO:0008152	metabolic process	10111	48	43.15	0.1809
23	GO:0006396	RNA processing	504	4	2.15	0.1940
24	GO:0006261	DNA-dependent DNA replication	68	1	0.29	0.2528
25	GO:0006281	DNA repair	260	2	1.11	0.3049
26	GO:0045454	cell redox homeostasis	98	1	0.42	0.3433
27	GO:0006996	organelle organization	388	3	1.66	0.3482
28	GO:0016579	protein deubiquitination	105	1	0.45	0.3628
29	GO:0006310	DNA recombination	308	4	1.31	0.3634
30	GO:0035023	regulation of Rho protein signal transdu...	108	1	0.46	0.3710
31	GO:0006511	ubiquitin-dependent protein catabolic pr...	153	1	0.65	0.4820
32	GO:0006468	protein phosphorylation	871	4	3.72	0.5142
33	GO:0006810	transport	2608	7	11.13	0.5217
34	GO:0006351	transcription, DNA-templated	943	3	4.02	0.5772
35	GO:0006139	nucleobase-containing compound metabolic...	3383	19	14.44	0.6734
36	GO:0016192	vesicle-mediated transport	296	1	1.26	0.7216
37	GO:0055085	transmembrane transport	1139	4	4.86	0.7509
38	GO:0006886	intracellular protein transport	331	1	1.41	0.7611
39	GO:0007186	G-protein coupled receptor signaling pat...	397	2	1.69	0.7983
40	GO:0006355	regulation of transcription, DNA-templat...	747	2	3.19	0.8352
41	GO:0007165	signal transduction	1420	7	6.06	0.8627
42	GO:0006508	proteolysis	1020	2	4.35	0.9714
43	GO:0050789	regulation of biological process	2389	11	10.19	1.0000
44	GO:0008150	biological_process	14763	63	63	1.0000
45	GO:0051234	establishment of localization	2616	7	11.16	1.0000
46	GO:0042398	cellular modified amino acid biosyntheti...	35	1	0.15	1.0000
47	GO:0006811	ion transport	865	1	3.69	1.0000
48	GO:0015031	protein transport	397	1	1.69	1.0000
49	GO:0006812	cation transport	413	1	1.76	1.0000
50	GO:0006813	potassium ion transport	98	1	0.42	1.0000
51	GO:0006260	DNA replication	236	1	1.01	1.0000
52	GO:0045184	establishment of protein localization	405	1	1.73	1.0000
53	GO:0010467	gene expression	2239	7	9.55	1.0000
54	GO:0010468	regulation of gene expression	813	2	3.47	1.0000
55	GO:0051641	cellular localization	450	1	1.92	1.0000
56	GO:0051346	negative regulation of hydrolase activit...	5	1	0.02	1.0000
57	GO:0009448	gamma-aminobutyric acid metabolic proces...	5	1	0.02	1.0000
58	GO:0006790	sulfur compound metabolic process	112	2	0.48	1.0000
59	GO:0051649	establishment of localization in cell	391	1	1.67	1.0000
60	GO:0048523	negative regulation of cellular process	81	1	0.35	1.0000
61	GO:0006793	phosphorus metabolic process	1685	6	7.19	1.0000
62	GO:0044419	interspecies interaction between organis...	12	1	0.05	1.0000
63	GO:0030036	actin cytoskeleton organization	42	1	0.18	1.0000

## Sheet: Module 8
	GO.ID	Term	Annotated	Significant	Expected	Fisher
1	GO:0015914	phospholipid transport	11	5	0.23	1.5e-06
2	GO:0051056	regulation of small GTPase mediated sign...	142	8	2.94	3.4e-05
3	GO:0006364	rRNA processing	46	6	0.95	0.00035
4	GO:0034333	adherens junction assembly	2	2	0.04	0.00043
5	GO:0006468	protein phosphorylation	871	33	18.05	0.00059
6	GO:0006511	ubiquitin-dependent protein catabolic pr...	153	10	3.17	0.00133
7	GO:0006429	leucyl-tRNA aminoacylation	4	2	0.08	0.00250
8	GO:0006426	glycyl-tRNA aminoacylation	5	2	0.1	0.00411
9	GO:0002098	tRNA wobble uridine modification	17	3	0.35	0.00483
10	GO:0042254	ribosome biogenesis	90	11	1.87	0.00859
11	GO:0003333	amino acid transmembrane transport	74	5	1.53	0.01865
12	GO:0008284	positive regulation of cell proliferatio...	1	1	0.02	0.02073
13	GO:0008543	fibroblast growth factor receptor signal...	1	1	0.02	0.02073
14	GO:0000027	ribosomal large subunit assembly	1	1	0.02	0.02073
15	GO:0048598	embryonic morphogenesis	1	1	0.02	0.02073
16	GO:0009972	cytidine deamination	1	1	0.02	0.02073
17	GO:0036265	RNA (guanine-N7)-methylation	1	1	0.02	0.02073
18	GO:0042246	tissue regeneration	1	1	0.02	0.02073
19	GO:0000266	mitochondrial fission	1	1	0.02	0.02073
20	GO:0007179	transforming growth factor beta receptor...	11	2	0.23	0.02082
21	GO:0043087	regulation of GTPase activity	36	3	0.75	0.03806
22	GO:0006120	mitochondrial electron transport, NADH t...	2	1	0.04	0.04103
23	GO:0051013	microtubule severing	2	1	0.04	0.04103
24	GO:0032218	riboflavin transport	2	1	0.04	0.04103
25	GO:0070536	protein K63-linked deubiquitination	2	1	0.04	0.04103
26	GO:0016567	protein ubiquitination	38	3	0.79	0.04364
27	GO:0006367	transcription initiation from RNA polyme...	18	2	0.37	0.05267
28	GO:0023052	signaling	1433	42	29.7	0.05845
29	GO:0043065	positive regulation of apoptotic process	3	1	0.06	0.06091
30	GO:0016579	protein deubiquitination	105	6	2.18	0.06231
31	GO:0046856	phosphatidylinositol dephosphorylation	20	2	0.41	0.06367
32	GO:0034508	centromere complex assembly	4	1	0.08	0.08038
33	GO:0006659	phosphatidylserine biosynthetic process	4	1	0.08	0.08038
34	GO:0006635	fatty acid beta-oxidation	4	1	0.08	0.08038
35	GO:0006396	RNA processing	504	21	10.45	0.09214
36	GO:0006816	calcium ion transport	45	3	0.93	0.09908
37	GO:0006430	lysyl-tRNA aminoacylation	5	1	0.1	0.09944
38	GO:0006435	threonyl-tRNA aminoacylation	5	1	0.1	0.09944
39	GO:0006672	ceramide metabolic process	5	1	0.1	0.09944
40	GO:0006888	ER to Golgi vesicle-mediated transport	28	2	0.58	0.11389
41	GO:0006401	RNA catabolic process	50	2	1.04	0.11808
42	GO:0006003	fructose 2,6-bisphosphate metabolic proc...	6	1	0.12	0.11811
43	GO:0007009	plasma membrane organization	6	1	0.12	0.11811
44	GO:0006351	transcription, DNA-templated	943	29	19.55	0.12650
45	GO:0006431	methionyl-tRNA aminoacylation	7	1	0.15	0.13640
46	GO:0019236	response to pheromone	7	1	0.15	0.13640
47	GO:0001678	cellular glucose homeostasis	7	1	0.15	0.13640
48	GO:0034227	tRNA thio-modification	7	1	0.15	0.13640
49	GO:0006428	isoleucyl-tRNA aminoacylation	7	1	0.15	0.13640
50	GO:0006397	mRNA processing	142	4	2.94	0.15255
51	GO:0016042	lipid catabolic process	20	2	0.41	0.15396
52	GO:0016180	snRNA processing	8	1	0.17	0.15431
53	GO:0042073	intraciliary transport	8	1	0.17	0.15431
54	GO:0006904	vesicle docking involved in exocytosis	35	2	0.73	0.16355
55	GO:0006464	cellular protein modification process	1466	54	30.39	0.17000
56	GO:0009072	aromatic amino acid family metabolic pro...	36	2	0.75	0.17093
57	GO:0035556	intracellular signal transduction	538	19	11.15	0.17139
58	GO:0051262	protein tetramerization	9	1	0.19	0.17185
59	GO:0044237	cellular metabolic process	6452	150	133.73	0.17446
60	GO:0006355	regulation of transcription, DNA-templat...	747	20	15.48	0.17749
61	GO:0070897	DNA-templated transcriptional preinitiat...	10	1	0.21	0.18902
62	GO:0006413	translational initiation	39	2	0.81	0.19338
63	GO:0070588	calcium ion transmembrane transport	40	2	0.83	0.20094
64	GO:0034968	histone lysine methylation	11	1	0.23	0.20585
65	GO:0046835	carbohydrate phosphorylation	11	1	0.23	0.20585
66	GO:0043631	RNA polyadenylation	11	1	0.23	0.20585
67	GO:0008299	isoprenoid biosynthetic process	41	2	0.85	0.20854
68	GO:0006376	mRNA splice site selection	12	1	0.25	0.22232
69	GO:0042981	regulation of apoptotic process	16	2	0.33	0.23781
70	GO:0006368	transcription elongation from RNA polyme...	13	1	0.27	0.23845
71	GO:0006955	immune response	13	1	0.27	0.23845
72	GO:0016485	protein processing	14	1	0.29	0.25425
73	GO:0006508	proteolysis	1020	31	21.14	0.25775
74	GO:0032012	regulation of ARF protein signal transdu...	15	1	0.31	0.26972
75	GO:0006915	apoptotic process	32	3	0.66	0.28355
76	GO:0006383	transcription from RNA polymerase III pr...	16	1	0.33	0.28487
77	GO:0006419	alanyl-tRNA aminoacylation	16	1	0.33	0.28487
78	GO:0007010	cytoskeleton organization	111	3	2.3	0.30879
79	GO:0055085	transmembrane transport	1139	29	23.61	0.31009
80	GO:0031123	RNA 3'-end processing	18	1	0.37	0.31425
81	GO:0006438	valyl-tRNA aminoacylation	19	1	0.39	0.32848
82	GO:0006596	polyamine biosynthetic process	19	1	0.39	0.32848
83	GO:0006487	protein N-linked glycosylation	19	1	0.39	0.32848
84	GO:0007165	signal transduction	1420	41	29.43	0.35409
85	GO:0007166	cell surface receptor signaling pathway	171	7	3.54	0.35531
86	GO:0006357	regulation of transcription from RNA pol...	62	2	1.29	0.36915
87	GO:0007205	protein kinase C-activating G-protein co...	22	1	0.46	0.36943
88	GO:0006813	potassium ion transport	98	3	2.03	0.37617
89	GO:0006470	protein dephosphorylation	107	3	2.22	0.38286
90	GO:0050482	arachidonic acid secretion	24	1	0.5	0.39534
91	GO:0006432	phenylalanyl-tRNA aminoacylation	25	1	0.52	0.40789
92	GO:0042147	retrograde transport, endosome to Golgi	28	1	0.58	0.44401
93	GO:0018342	protein prenylation	28	1	0.58	0.44401
94	GO:0009253	peptidoglycan catabolic process	29	1	0.6	0.45556
95	GO:0006072	glycerol-3-phosphate metabolic process	29	1	0.6	0.45556
96	GO:0007264	small GTPase mediated signal transductio...	221	10	4.58	0.47426
97	GO:0016055	Wnt signaling pathway	32	1	0.66	0.48878
98	GO:0008033	tRNA processing	144	5	2.98	0.50650
99	GO:0006644	phospholipid metabolic process	180	6	3.73	0.50750
100	GO:0046488	phosphatidylinositol metabolic process	103	4	2.13	0.51321
101	GO:0071805	potassium ion transmembrane transport	35	1	0.73	0.51999
102	GO:0000413	protein peptidyl-prolyl isomerization	36	1	0.75	0.52996
103	GO:0016311	dephosphorylation	164	6	3.4	0.53690
104	GO:0032259	methylation	108	3	2.24	0.53910
105	GO:0000956	nuclear-transcribed mRNA catabolic proce...	38	1	0.79	0.54929
106	GO:0016192	vesicle-mediated transport	296	9	6.14	0.55618
107	GO:0006807	nitrogen compound metabolic process	6768	156	140.28	0.56682
108	GO:0030001	metal ion transport	257	7	5.33	0.60071
109	GO:0048193	Golgi vesicle transport	73	3	1.51	0.60919
110	GO:0001522	pseudouridine synthesis	45	1	0.93	0.61092
111	GO:0007275	multicellular organism development	57	2	1.18	0.63370
112	GO:0006629	lipid metabolic process	449	13	9.31	0.63486
113	GO:0006486	protein glycosylation	70	2	1.45	0.65627
114	GO:0035023	regulation of Rho protein signal transdu...	108	2	2.24	0.65890
115	GO:0007186	G-protein coupled receptor signaling pat...	397	8	8.23	0.66162
116	GO:0006310	DNA recombination	308	5	6.38	0.66587
117	GO:0006811	ion transport	865	24	17.93	0.71318
118	GO:0006814	sodium ion transport	64	1	1.33	0.73904
119	GO:0019752	carboxylic acid metabolic process	607	16	12.58	0.75050
120	GO:0015031	protein transport	397	7	8.23	0.75082
121	GO:0006812	cation transport	413	8	8.56	0.76527
122	GO:0006313	transposition, DNA-mediated	199	3	4.12	0.78464
123	GO:0006281	DNA repair	260	4	5.39	0.79091
124	GO:0006886	intracellular protein transport	331	6	6.86	0.80141
125	GO:0006836	neurotransmitter transport	86	1	1.78	0.83578
126	GO:0045454	cell redox homeostasis	98	1	2.03	0.87248
127	GO:0051276	chromosome organization	176	3	3.65	0.88241
128	GO:0007155	cell adhesion	106	1	2.2	0.89228
129	GO:0005975	carbohydrate metabolic process	736	10	15.26	0.89677
130	GO:0007018	microtubule-based movement	119	2	2.47	0.90244
131	GO:0006418	tRNA aminoacylation for protein translat...	212	12	4.39	0.91172
132	GO:0009058	biosynthetic process	2947	52	61.08	0.93912
133	GO:0006457	protein folding	134	1	2.78	0.94037
134	GO:0006164	purine nucleotide biosynthetic process	155	1	3.21	0.96176
135	GO:0006810	transport	2608	54	54.06	0.98277
136	GO:0008152	metabolic process	10111	200	209.58	0.98550
137	GO:0006260	DNA replication	236	1	4.89	0.99315
138	GO:0055114	oxidation-reduction process	1668	12	34.57	1.00000
139	GO:0048878	chemical homeostasis	32	1	0.66	1.00000
140	GO:0033500	carbohydrate homeostasis	7	1	0.15	1.00000
141	GO:0006575	cellular modified amino acid metabolic p...	56	1	1.16	1.00000
142	GO:0007265	Ras protein signal transduction	124	3	2.57	1.00000
143	GO:0006576	cellular biogenic amine metabolic proces...	30	1	0.62	1.00000
144	GO:0007266	Rho protein signal transduction	109	2	2.26	1.00000
145	GO:0032501	multicellular organismal process	156	2	3.23	1.00000
146	GO:0007267	cell-cell signaling	42	1	0.87	1.00000
147	GO:0032502	developmental process	58	3	1.2	1.00000
148	GO:0097354	prenylation	28	1	0.58	1.00000
149	GO:0071363	cellular response to growth factor stimu...	17	3	0.35	1.00000
150	GO:0032196	transposition	199	3	4.12	1.00000
151	GO:0060255	regulation of macromolecule metabolic pr...	839	21	17.39	1.00000
152	GO:0000270	peptidoglycan metabolic process	30	1	0.62	1.00000
153	GO:0031503	protein complex localization	9	1	0.19	1.00000
154	GO:0051716	cellular response to stimulus	1696	45	35.15	1.00000
155	GO:0034329	cell junction assembly	2	2	0.04	1.00000
156	GO:0006520	cellular amino acid metabolic process	429	14	8.89	1.00000
157	GO:0006399	tRNA metabolic process	363	17	7.52	1.00000
158	GO:0001510	RNA methylation	31	1	0.64	1.00000
159	GO:0045333	cellular respiration	39	1	0.81	1.00000
160	GO:0031323	regulation of cellular metabolic process	806	20	16.71	1.00000
161	GO:0010256	endomembrane system organization	13	1	0.27	1.00000
162	GO:0031326	regulation of cellular biosynthetic proc...	773	20	16.02	1.00000
163	GO:0022406	membrane docking	42	2	0.87	1.00000
164	GO:0006259	DNA metabolic process	1094	8	22.68	1.00000
165	GO:0008283	cell proliferation	2	1	0.04	1.00000
166	GO:0030163	protein catabolic process	190	10	3.94	1.00000
167	GO:0043170	macromolecule metabolic process	5825	147	120.74	1.00000
168	GO:0043043	peptide biosynthetic process	763	14	15.82	1.00000
169	GO:0000226	microtubule cytoskeleton organization	57	1	1.18	1.00000
170	GO:0030203	glycosaminoglycan metabolic process	38	1	0.79	1.00000
171	GO:0016570	histone modification	45	1	0.93	1.00000
172	GO:0051603	proteolysis involved in cellular protein...	180	10	3.73	1.00000
173	GO:1901657	glycosyl compound metabolic process	95	1	1.97	1.00000
174	GO:0016571	histone methylation	11	1	0.23	1.00000
175	GO:0051604	protein maturation	26	1	0.54	1.00000
176	GO:0006518	peptide metabolic process	789	14	16.35	1.00000
177	GO:1901658	glycosyl compound catabolic process	3	1	0.06	1.00000
178	GO:0045184	establishment of protein localization	405	7	8.39	1.00000
179	GO:0045017	glycerolipid biosynthetic process	36	1	0.75	1.00000
180	GO:0009259	ribonucleotide metabolic process	242	1	5.02	1.00000
181	GO:0002097	tRNA wobble base modification	18	3	0.37	1.00000
182	GO:1905039	carboxylic acid transmembrane transport	80	5	1.66	1.00000
183	GO:0043038	amino acid activation	219	12	4.54	1.00000
184	GO:0034330	cell junction organization	2	2	0.04	1.00000
185	GO:0043039	tRNA aminoacylation	219	12	4.54	1.00000
186	GO:0034332	adherens junction organization	2	2	0.04	1.00000
187	GO:0042127	regulation of cell proliferation	2	1	0.04	1.00000
188	GO:0006091	generation of precursor metabolites and ...	144	1	2.98	1.00000
189	GO:0006400	tRNA modification	62	3	1.29	1.00000
190	GO:0006366	transcription from RNA polymerase II pro...	95	5	1.97	1.00000
191	GO:0006402	mRNA catabolic process	44	1	0.91	1.00000
192	GO:0000245	spliceosomal complex assembly	20	1	0.41	1.00000
193	GO:1905114	cell surface receptor signaling pathway ...	32	1	0.66	1.00000
194	GO:0070085	glycosylation	72	2	1.49	1.00000
195	GO:0070887	cellular response to chemical stimulus	58	3	1.2	1.00000
196	GO:0000375	RNA splicing, via transesterification re...	77	1	1.6	1.00000
197	GO:0046034	ATP metabolic process	115	1	2.38	1.00000
198	GO:0000377	RNA splicing, via transesterification re...	77	1	1.6	1.00000
199	GO:0019395	fatty acid oxidation	4	1	0.08	1.00000
200	GO:0046839	phospholipid dephosphorylation	20	2	0.41	1.00000
201	GO:0006352	DNA-templated transcription, initiation	62	3	1.29	1.00000
202	GO:0072329	monocarboxylic acid catabolic process	10	1	0.21	1.00000
203	GO:0006354	DNA-templated transcription, elongation	17	1	0.35	1.00000
204	GO:0023051	regulation of signaling	190	8	3.94	1.00000
205	GO:0008213	protein alkylation	36	1	0.75	1.00000
206	GO:0019438	aromatic compound biosynthetic process	1353	30	28.04	1.00000
207	GO:0009892	negative regulation of metabolic process	80	1	1.66	1.00000
208	GO:0008380	RNA splicing	94	1	1.95	1.00000
209	GO:0040007	growth	5	1	0.1	1.00000
210	GO:0019439	aromatic compound catabolic process	107	3	2.22	1.00000
211	GO:0032011	ARF protein signal transduction	15	1	0.31	1.00000
212	GO:1901135	carbohydrate derivative metabolic proces...	622	7	12.89	1.00000
213	GO:1901136	carbohydrate derivative catabolic proces...	56	2	1.16	1.00000
214	GO:0008219	cell death	33	3	0.68	1.00000
215	GO:1901137	carbohydrate derivative biosynthetic pro...	294	2	6.09	1.00000
216	GO:0071310	cellular response to organic substance	55	3	1.14	1.00000
217	GO:0006213	pyrimidine nucleoside metabolic process	20	1	0.41	1.00000
218	GO:0030030	cell projection organization	18	1	0.37	1.00000
219	GO:0006216	cytidine catabolic process	1	1	0.02	1.00000
220	GO:0002376	immune system process	13	1	0.27	1.00000
221	GO:0034660	ncRNA metabolic process	417	22	8.64	1.00000
222	GO:0043933	macromolecular complex subunit organizat...	237	5	4.91	1.00000
223	GO:0051252	regulation of RNA metabolic process	749	20	15.52	1.00000
224	GO:0046942	carboxylic acid transport	120	6	2.49	1.00000
225	GO:0198738	cell-cell signaling by wnt	32	1	0.66	1.00000
226	GO:0051259	protein oligomerization	34	1	0.7	1.00000
227	GO:0006865	amino acid transport	82	5	1.7	1.00000
228	GO:0050896	response to stimulus	1832	47	37.97	1.00000
229	GO:0006996	organelle organization	388	9	8.04	1.00000
230	GO:0034654	nucleobase-containing compound biosynthe...	1242	30	25.74	1.00000
231	GO:0006869	lipid transport	98	6	2.03	1.00000
232	GO:0034655	nucleobase-containing compound catabolic...	93	3	1.93	1.00000
233	GO:0033036	macromolecule localization	527	13	10.92	1.00000
234	GO:0090304	nucleic acid metabolic process	2819	70	58.43	1.00000
235	GO:0044782	cilium organization	13	1	0.27	1.00000
236	GO:0046131	pyrimidine ribonucleoside metabolic proc...	19	1	0.39	1.00000
237	GO:0046133	pyrimidine ribonucleoside catabolic proc...	1	1	0.02	1.00000
238	GO:0032309	icosanoid secretion	24	1	0.5	1.00000
239	GO:0046135	pyrimidine nucleoside catabolic process	1	1	0.02	1.00000
240	GO:0071822	protein complex subunit organization	162	1	3.36	1.00000
241	GO:0071824	protein-DNA complex subunit organization	29	2	0.6	1.00000
242	GO:0006325	chromatin organization	70	1	1.45	1.00000
243	GO:0071826	ribonucleoprotein complex subunit organi...	46	2	0.95	1.00000
244	GO:0019222	regulation of metabolic process	853	21	17.68	1.00000
245	GO:0009062	fatty acid catabolic process	4	1	0.08	1.00000
246	GO:0098840	protein transport along microtubule	8	1	0.17	1.00000
247	GO:0019538	protein metabolic process	3136	90	65	1.00000
248	GO:0070848	response to growth factor	17	3	0.35	1.00000
249	GO:0012501	programmed cell death	32	3	0.66	1.00000
250	GO:0098660	inorganic ion transmembrane transport	153	3	3.17	1.00000
251	GO:0098662	inorganic cation transmembrane transport	152	3	3.15	1.00000
252	GO:0009199	ribonucleoside triphosphate metabolic pr...	139	1	2.88	1.00000
253	GO:0042773	ATP synthesis coupled electron transport	8	1	0.17	1.00000
254	GO:0006082	organic acid metabolic process	615	16	12.75	1.00000
255	GO:0140056	organelle localization by membrane tethe...	42	2	0.87	1.00000
256	GO:0018193	peptidyl-amino acid modification	95	2	1.97	1.00000
257	GO:0042775	mitochondrial ATP synthesis coupled elec...	4	1	0.08	1.00000
258	GO:0006887	exocytosis	54	2	1.12	1.00000
259	GO:0042592	homeostatic process	160	2	3.32	1.00000
260	GO:0032940	secretion by cell	59	2	1.22	1.00000
261	GO:0044106	cellular amine metabolic process	34	1	0.7	1.00000
262	GO:0070925	organelle assembly	14	1	0.29	1.00000
263	GO:0042593	glucose homeostasis	7	1	0.15	1.00000
264	GO:0043632	modification-dependent macromolecule cat...	153	10	3.17	1.00000
265	GO:0070838	divalent metal ion transport	57	3	1.18	1.00000
266	GO:0009056	catabolic process	536	16	11.11	1.00000
267	GO:0009057	macromolecule catabolic process	275	13	5.7	1.00000
268	GO:0019219	regulation of nucleobase-containing comp...	755	20	15.65	1.00000
269	GO:0071840	cellular component organization or bioge...	698	25	14.47	1.00000
270	GO:0009059	macromolecule biosynthetic process	2072	46	42.95	1.00000
271	GO:0016197	endosomal transport	28	1	0.58	1.00000
272	GO:0098655	cation transmembrane transport	152	3	3.15	1.00000
273	GO:0098656	anion transmembrane transport	82	5	1.7	1.00000
274	GO:0010876	lipid localization	103	6	2.13	1.00000
275	GO:0034622	cellular macromolecular complex assembly	161	4	3.34	1.00000
276	GO:0006163	purine nucleotide metabolic process	260	2	5.39	1.00000
277	GO:0007167	enzyme linked receptor protein signaling...	38	3	0.79	1.00000
278	GO:0042454	ribonucleoside catabolic process	2	1	0.04	1.00000
279	GO:0007169	transmembrane receptor protein tyrosine ...	25	1	0.52	1.00000
280	GO:0097659	nucleic acid-templated transcription	943	29	19.55	1.00000
281	GO:0046903	secretion	83	3	1.72	1.00000
282	GO:0008150	biological_process	14763	306	306	1.00000
283	GO:0016054	organic acid catabolic process	43	1	0.89	1.00000
284	GO:0009888	tissue development	1	1	0.02	1.00000
285	GO:0009889	regulation of biosynthetic process	773	20	16.02	1.00000
286	GO:0046907	intracellular transport	390	7	8.08	1.00000
287	GO:0006820	anion transport	216	12	4.48	1.00000
288	GO:0006950	response to stress	401	5	8.31	1.00000
289	GO:0007154	cell communication	1433	41	29.7	1.00000
290	GO:0006022	aminoglycan metabolic process	109	1	2.26	1.00000
291	GO:0016310	phosphorylation	1029	35	21.33	1.00000
292	GO:1901564	organonitrogen compound metabolic proces...	4026	99	83.45	1.00000
293	GO:1901565	organonitrogen compound catabolic proces...	292	12	6.05	1.00000
294	GO:1901566	organonitrogen compound biosynthetic pro...	1325	19	27.46	1.00000
295	GO:1901293	nucleoside phosphate biosynthetic proces...	249	1	5.16	1.00000
296	GO:0034613	cellular protein localization	346	6	7.17	1.00000
297	GO:0006026	aminoglycan catabolic process	30	1	0.62	1.00000
298	GO:0009161	ribonucleoside monophosphate metabolic p...	144	1	2.98	1.00000
299	GO:0006027	glycosaminoglycan catabolic process	29	1	0.6	1.00000
300	GO:0009164	nucleoside catabolic process	3	1	0.06	1.00000
301	GO:0009966	regulation of signal transduction	189	8	3.92	1.00000
302	GO:0009165	nucleotide biosynthetic process	248	1	5.14	1.00000
303	GO:0009167	purine ribonucleoside monophosphate meta...	137	1	2.84	1.00000
304	GO:0009205	purine ribonucleoside triphosphate metab...	137	1	2.84	1.00000
305	GO:0061024	membrane organization	38	1	0.79	1.00000
306	GO:0007017	microtubule-based process	217	3	4.5	1.00000

## Sheet: Module 9
	GO.ID	Term	Annotated	Significant	Expected	Fisher
1	GO:0009253	peptidoglycan catabolic process	29	5	0.56	0.00021
2	GO:0006470	protein dephosphorylation	107	9	2.07	0.00023
3	GO:0006369	termination of RNA polymerase II transcr...	2	2	0.04	0.00037
4	GO:0006378	mRNA polyadenylation	5	2	0.1	0.00360
5	GO:0034551	mitochondrial respiratory chain complex ...	6	2	0.12	0.00533
6	GO:0006379	mRNA cleavage	6	2	0.12	0.00533
7	GO:0006003	fructose 2,6-bisphosphate metabolic proc...	6	2	0.12	0.00533
8	GO:0006487	protein N-linked glycosylation	19	3	0.37	0.00554
9	GO:0006000	fructose metabolic process	7	2	0.14	0.00736
10	GO:0006518	peptide metabolic process	789	16	15.29	0.00977
11	GO:0006511	ubiquitin-dependent protein catabolic pr...	153	8	2.96	0.00994
12	GO:0006885	regulation of pH	10	2	0.19	0.01519
13	GO:0016579	protein deubiquitination	105	6	2.03	0.01636
14	GO:0007018	microtubule-based movement	119	6	2.31	0.02827
15	GO:0006886	intracellular protein transport	331	12	6.41	0.03578
16	GO:0016567	protein ubiquitination	38	3	0.74	0.03687
17	GO:0007165	signal transduction	1420	36	27.51	0.03723
18	GO:0006419	alanyl-tRNA aminoacylation	16	2	0.31	0.03753
19	GO:0006812	cation transport	413	11	8	0.04457
20	GO:0000184	nuclear-transcribed mRNA catabolic proce...	18	2	0.35	0.04666
21	GO:0001507	acetylcholine catabolic process in synap...	3	1	0.06	0.05700
22	GO:0000012	single strand break repair	3	1	0.06	0.05700
23	GO:0035023	regulation of Rho protein signal transdu...	108	5	2.09	0.05883
24	GO:0048268	clathrin coat assembly	4	1	0.08	0.07528
25	GO:0006425	glutaminyl-tRNA aminoacylation	4	1	0.08	0.07528
26	GO:0006635	fatty acid beta-oxidation	4	1	0.08	0.07528
27	GO:0006914	autophagy	25	2	0.48	0.08382
28	GO:0017183	peptidyl-diphthamide biosynthetic proces...	5	1	0.1	0.09319
29	GO:0031175	neuron projection development	5	1	0.1	0.09319
30	GO:0006625	protein targeting to peroxisome	5	1	0.1	0.09319
31	GO:0006406	mRNA export from nucleus	5	1	0.1	0.09319
32	GO:0007033	vacuole organization	6	1	0.12	0.11077
33	GO:0042026	protein refolding	6	1	0.12	0.11077
34	GO:0006171	cAMP biosynthetic process	6	1	0.12	0.11077
35	GO:0045087	innate immune response	6	1	0.12	0.11077
36	GO:0043401	steroid hormone mediated signaling pathw...	32	2	0.62	0.12710
37	GO:0097428	protein maturation by iron-sulfur cluste...	7	1	0.14	0.12800
38	GO:0032784	regulation of DNA-templated transcriptio...	7	1	0.14	0.12800
39	GO:0006488	dolichol-linked oligosaccharide biosynth...	7	1	0.14	0.12800
40	GO:0060964	regulation of gene silencing by miRNA	7	1	0.14	0.12800
41	GO:0080009	mRNA methylation	8	1	0.15	0.14490
42	GO:0006904	vesicle docking involved in exocytosis	35	2	0.68	0.14697
43	GO:0043087	regulation of GTPase activity	36	2	0.7	0.15372
44	GO:0051262	protein tetramerization	9	1	0.17	0.16148
45	GO:0006542	glutamine biosynthetic process	10	1	0.19	0.17773
46	GO:0006420	arginyl-tRNA aminoacylation	10	1	0.19	0.17773
47	GO:0006434	seryl-tRNA aminoacylation	10	1	0.19	0.17773
48	GO:0007219	Notch signaling pathway	11	1	0.21	0.19367
49	GO:0034968	histone lysine methylation	11	1	0.21	0.19367
50	GO:0007179	transforming growth factor beta receptor...	11	1	0.21	0.19367
51	GO:0005992	trehalose biosynthetic process	11	1	0.21	0.19367
52	GO:0000390	spliceosomal complex disassembly	12	1	0.23	0.20930
53	GO:0006144	purine nucleobase metabolic process	12	1	0.23	0.20930
54	GO:0007172	signal complex assembly	12	1	0.23	0.20930
55	GO:0001522	pseudouridine synthesis	45	2	0.87	0.21665
56	GO:0006364	rRNA processing	46	2	0.89	0.22380
57	GO:0006836	neurotransmitter transport	86	3	1.67	0.23270
58	GO:0006457	protein folding	134	5	2.6	0.23485
59	GO:0006334	nucleosome assembly	15	1	0.29	0.25441
60	GO:0006002	fructose 6-phosphate metabolic process	15	1	0.29	0.25441
61	GO:0006164	purine nucleotide biosynthetic process	155	2	3	0.25575
62	GO:0015074	DNA integration	359	9	6.95	0.26198
63	GO:0006351	transcription, DNA-templated	943	24	18.27	0.29031
64	GO:0006813	potassium ion transport	98	3	1.9	0.29549
65	GO:0006367	transcription initiation from RNA polyme...	18	1	0.35	0.29696
66	GO:0006751	glutathione catabolic process	18	1	0.35	0.29696
67	GO:0016226	iron-sulfur cluster assembly	18	1	0.35	0.29696
68	GO:0016573	histone acetylation	18	1	0.35	0.29696
69	GO:0051056	regulation of small GTPase mediated sign...	142	6	2.75	0.30820
70	GO:0006596	polyamine biosynthetic process	19	1	0.37	0.31059
71	GO:0006438	valyl-tRNA aminoacylation	19	1	0.37	0.31059
72	GO:0009226	nucleotide-sugar biosynthetic process	20	1	0.39	0.32397
73	GO:0006633	fatty acid biosynthetic process	20	1	0.39	0.32397
74	GO:0006468	protein phosphorylation	871	19	16.87	0.32935
75	GO:0006357	regulation of transcription from RNA pol...	62	2	1.2	0.33862
76	GO:0007205	protein kinase C-activating G-protein co...	22	1	0.43	0.34994
77	GO:0006525	arginine metabolic process	22	1	0.43	0.34994
78	GO:0006814	sodium ion transport	64	2	1.24	0.35274
79	GO:0045892	negative regulation of transcription, DN...	23	1	0.45	0.36255
80	GO:0007015	actin filament organization	24	1	0.46	0.37492
81	GO:0006629	lipid metabolic process	449	8	8.7	0.37503
82	GO:0051259	protein oligomerization	34	2	0.66	0.38618
83	GO:0006479	protein methylation	36	2	0.7	0.38622
84	GO:0006750	glutathione biosynthetic process	25	1	0.48	0.38705
85	GO:0006298	mismatch repair	25	1	0.48	0.38705
86	GO:0006432	phenylalanyl-tRNA aminoacylation	25	1	0.48	0.38705
87	GO:0006355	regulation of transcription, DNA-templat...	747	17	14.47	0.39798
88	GO:0007156	homophilic cell adhesion via plasma memb...	27	1	0.52	0.41061
89	GO:0018342	protein prenylation	28	1	0.54	0.42205
90	GO:0007264	small GTPase mediated signal transductio...	221	8	4.28	0.44214
91	GO:0000160	phosphorelay signal transduction system	30	1	0.58	0.44427
92	GO:0016055	Wnt signaling pathway	32	1	0.62	0.46564
93	GO:0006915	apoptotic process	32	1	0.62	0.46564
94	GO:0005978	glycogen biosynthetic process	33	1	0.64	0.47601
95	GO:0007020	microtubule nucleation	34	1	0.66	0.48618
96	GO:0000413	protein peptidyl-prolyl isomerization	36	1	0.7	0.50594
97	GO:0008033	tRNA processing	144	3	2.79	0.53084
98	GO:0006996	organelle organization	388	10	7.52	0.53130
99	GO:0007166	cell surface receptor signaling pathway	171	5	3.31	0.53209
100	GO:0006413	translational initiation	39	1	0.76	0.53417
101	GO:0008299	isoprenoid biosynthetic process	41	1	0.79	0.55210
102	GO:0000278	mitotic cell cycle	43	1	0.83	0.56933
103	GO:0030001	metal ion transport	257	7	4.98	0.58179
104	GO:0007275	multicellular organism development	57	2	1.1	0.58491
105	GO:0055114	oxidation-reduction process	1668	32	32.31	0.58882
106	GO:0051726	regulation of cell cycle	47	1	0.91	0.60184
107	GO:0035556	intracellular signal transduction	538	14	10.42	0.60679
108	GO:0046907	intracellular transport	390	13	7.56	0.66542
109	GO:0006508	proteolysis	1020	24	19.76	0.67706
110	GO:0016192	vesicle-mediated transport	296	6	5.73	0.69076
111	GO:0019752	carboxylic acid metabolic process	607	14	11.76	0.69433
112	GO:0015031	protein transport	397	13	7.69	0.71860
113	GO:0000398	mRNA splicing, via spliceosome	77	2	1.49	0.71943
114	GO:0006096	glycolytic process	68	1	1.32	0.73640
115	GO:0006313	transposition, DNA-mediated	199	3	3.86	0.74472
116	GO:0006030	chitin metabolic process	71	1	1.38	0.75150
117	GO:0016310	phosphorylation	1029	21	19.93	0.77287
118	GO:0007155	cell adhesion	106	2	2.05	0.78711
119	GO:0006810	transport	2608	46	50.52	0.82250
120	GO:0006811	ion transport	865	15	16.76	0.84377
121	GO:0045454	cell redox homeostasis	98	1	1.9	0.85391
122	GO:0006869	lipid transport	98	1	1.9	0.85391
123	GO:0008152	metabolic process	10111	195	195.88	0.85452
124	GO:0006464	cellular protein modification process	1466	47	28.4	0.87118
125	GO:0006310	DNA recombination	308	4	5.97	0.88316
126	GO:0005975	carbohydrate metabolic process	736	11	14.26	0.89154
127	GO:0055085	transmembrane transport	1139	17	22.07	0.89726
128	GO:0006418	tRNA aminoacylation for protein translat...	212	8	4.11	0.91517
129	GO:0007186	G-protein coupled receptor signaling pat...	397	4	7.69	0.97763
130	GO:0006820	anion transport	216	1	4.18	0.98583
131	GO:0006281	DNA repair	260	3	5.04	0.98945
132	GO:0006260	DNA replication	236	1	4.57	0.99048
133	GO:0006412	translation	737	12	14.28	0.99975
134	GO:0022610	biological adhesion	107	2	2.07	1.00000
135	GO:0009084	glutamine family amino acid biosynthetic...	38	1	0.74	1.00000
136	GO:0022613	ribonucleoprotein complex biogenesis	120	2	2.32	1.00000
137	GO:0032259	methylation	108	3	2.09	1.00000
138	GO:0007265	Ras protein signal transduction	124	5	2.4	1.00000
139	GO:0044242	cellular lipid catabolic process	12	1	0.23	1.00000
140	GO:0007266	Rho protein signal transduction	109	5	2.11	1.00000
141	GO:0007267	cell-cell signaling	42	2	0.81	1.00000
142	GO:0070727	cellular macromolecule localization	346	12	6.7	1.00000
143	GO:0030030	cell projection organization	18	1	0.35	1.00000
144	GO:0007268	chemical synaptic transmission	9	1	0.17	1.00000
145	GO:0090501	RNA phosphodiester bond hydrolysis	8	2	0.15	1.00000
146	GO:0044248	cellular catabolic process	399	15	7.73	1.00000
147	GO:0000270	peptidoglycan metabolic process	30	5	0.58	1.00000
148	GO:0044249	cellular biosynthetic process	2768	51	53.62	1.00000
149	GO:0000271	polysaccharide biosynthetic process	42	1	0.81	1.00000
150	GO:0030036	actin cytoskeleton organization	42	1	0.81	1.00000
151	GO:0006396	RNA processing	504	9	9.76	1.00000
152	GO:0006397	mRNA processing	142	4	2.75	1.00000
153	GO:0006399	tRNA metabolic process	363	11	7.03	1.00000
154	GO:0007010	cytoskeleton organization	111	2	2.15	1.00000
155	GO:0009451	RNA modification	133	3	2.58	1.00000
156	GO:0009260	ribonucleotide biosynthetic process	144	1	2.79	1.00000
157	GO:0022406	membrane docking	42	2	0.81	1.00000
158	GO:0099536	synaptic signaling	9	1	0.17	1.00000
159	GO:0044237	cellular metabolic process	6452	134	124.99	1.00000
160	GO:0007017	microtubule-based process	217	7	4.2	1.00000
161	GO:0006807	nitrogen compound metabolic process	6768	143	131.11	1.00000
162	GO:0099537	trans-synaptic signaling	9	1	0.17	1.00000
163	GO:0044238	primary metabolic process	7459	147	144.5	1.00000
164	GO:0005984	disaccharide metabolic process	21	1	0.41	1.00000
165	GO:0072330	monocarboxylic acid biosynthetic process	30	1	0.58	1.00000
166	GO:0043170	macromolecule metabolic process	5825	131	112.85	1.00000
167	GO:1902531	regulation of intracellular signal trans...	154	6	2.98	1.00000
168	GO:0043171	peptide catabolic process	18	1	0.35	1.00000
169	GO:0019362	pyridine nucleotide metabolic process	101	1	1.96	1.00000
170	GO:0000226	microtubule cytoskeleton organization	57	1	1.1	1.00000
171	GO:0050657	nucleic acid transport	17	1	0.33	1.00000
172	GO:0050658	RNA transport	17	1	0.33	1.00000
173	GO:0120036	plasma membrane bounded cell projection ...	18	1	0.35	1.00000
174	GO:0051603	proteolysis involved in cellular protein...	180	8	3.49	1.00000
175	GO:0009250	glucan biosynthetic process	40	1	0.77	1.00000
176	GO:0051604	protein maturation	26	1	0.5	1.00000
177	GO:0045184	establishment of protein localization	405	13	7.85	1.00000
178	GO:0007049	cell cycle	117	2	2.27	1.00000
179	GO:0006605	protein targeting	58	1	1.12	1.00000
180	GO:0072521	purine-containing compound metabolic pro...	278	4	5.39	1.00000
181	GO:0072522	purine-containing compound biosynthetic ...	167	2	3.24	1.00000
182	GO:0006790	sulfur compound metabolic process	112	3	2.17	1.00000
183	GO:0072524	pyridine-containing compound metabolic p...	110	1	2.13	1.00000
184	GO:0032870	cellular response to hormone stimulus	35	2	0.68	1.00000
185	GO:0007271	synaptic transmission, cholinergic	4	1	0.08	1.00000
186	GO:0009259	ribonucleotide metabolic process	242	2	4.69	1.00000
187	GO:0005976	polysaccharide metabolic process	43	1	0.83	1.00000
188	GO:0006793	phosphorus metabolic process	1685	34	32.64	1.00000
189	GO:0005977	glycogen metabolic process	33	1	0.64	1.00000
190	GO:0033108	mitochondrial respiratory chain complex ...	7	2	0.14	1.00000
191	GO:0007031	peroxisome organization	12	1	0.23	1.00000
192	GO:0010556	regulation of macromolecule biosynthetic...	773	19	14.98	1.00000
193	GO:0015672	monovalent inorganic cation transport	243	5	4.71	1.00000
194	GO:0052652	cyclic purine nucleotide metabolic proce...	51	1	0.99	1.00000
195	GO:0006796	phosphate-containing compound metabolic ...	1676	34	32.47	1.00000
196	GO:0010558	negative regulation of macromolecule bio...	32	2	0.62	1.00000
197	GO:0031163	metallo-sulfur cluster assembly	18	1	0.35	1.00000
198	GO:0032446	protein modification by small protein co...	45	3	0.87	1.00000
199	GO:0017182	peptidyl-diphthamide metabolic process	5	1	0.1	1.00000
200	GO:0006366	transcription from RNA polymerase II pro...	95	5	1.84	1.00000
201	GO:0008104	protein localization	412	13	7.98	1.00000
202	GO:0040029	regulation of gene expression, epigeneti...	8	1	0.15	1.00000
203	GO:0048583	regulation of response to stimulus	196	7	3.8	1.00000
204	GO:0006595	polyamine metabolic process	19	1	0.37	1.00000
205	GO:0098771	inorganic ion homeostasis	23	2	0.45	1.00000
206	GO:0006352	DNA-templated transcription, initiation	62	1	1.2	1.00000
207	GO:0006353	DNA-templated transcription, termination	6	2	0.12	1.00000
208	GO:0043574	peroxisomal transport	5	1	0.1	1.00000
209	GO:0006354	DNA-templated transcription, elongation	17	1	0.33	1.00000
210	GO:0006163	purine nucleotide metabolic process	260	3	5.04	1.00000
211	GO:0051168	nuclear export	5	1	0.1	1.00000
212	GO:0051169	nuclear transport	21	1	0.41	1.00000
213	GO:0006165	nucleoside diphosphate phosphorylation	82	1	1.59	1.00000
214	GO:0016051	carbohydrate biosynthetic process	91	2	1.76	1.00000
215	GO:0016052	carbohydrate catabolic process	76	1	1.47	1.00000
216	GO:0016053	organic acid biosynthetic process	130	2	2.52	1.00000
217	GO:0016054	organic acid catabolic process	43	1	0.83	1.00000
218	GO:0009889	regulation of biosynthetic process	773	19	14.98	1.00000
219	GO:0071426	ribonucleoprotein complex export from nu...	5	1	0.1	1.00000
220	GO:0022607	cellular component assembly	230	9	4.46	1.00000
221	GO:0071427	mRNA-containing ribonucleoprotein comple...	5	1	0.1	1.00000
222	GO:0019184	nonribosomal peptide biosynthetic proces...	26	1	0.5	1.00000
223	GO:0014070	response to organic cyclic compound	32	2	0.62	1.00000
224	GO:0009225	nucleotide-sugar metabolic process	24	1	0.46	1.00000
225	GO:0060255	regulation of macromolecule metabolic pr...	839	21	16.25	1.00000
226	GO:0015833	peptide transport	410	13	7.94	1.00000
227	GO:0046390	ribose phosphate biosynthetic process	144	1	2.79	1.00000
228	GO:0042254	ribosome biogenesis	90	2	1.74	1.00000
229	GO:0048523	negative regulation of cellular process	81	2	1.57	1.00000
230	GO:0031323	regulation of cellular metabolic process	806	19	15.61	1.00000
231	GO:0046394	carboxylic acid biosynthetic process	130	2	2.52	1.00000
232	GO:0031324	negative regulation of cellular metaboli...	36	2	0.7	1.00000
233	GO:0046395	carboxylic acid catabolic process	43	1	0.83	1.00000
234	GO:0007005	mitochondrion organization	44	2	0.85	1.00000
235	GO:0031326	regulation of cellular biosynthetic proc...	773	19	14.98	1.00000
236	GO:0031327	negative regulation of cellular biosynth...	32	2	0.62	1.00000
237	GO:0051186	cofactor metabolic process	251	2	4.86	1.00000
238	GO:0051188	cofactor biosynthetic process	148	1	2.87	1.00000
239	GO:0016070	RNA metabolic process	1760	44	34.1	1.00000
240	GO:0008291	acetylcholine metabolic process	3	1	0.06	1.00000
241	GO:0016071	mRNA metabolic process	193	7	3.74	1.00000
242	GO:0018202	peptidyl-histidine modification	5	1	0.1	1.00000
243	GO:0016072	rRNA metabolic process	50	2	0.97	1.00000
244	GO:0006753	nucleoside phosphate metabolic process	413	3	8	1.00000
245	GO:0018205	peptidyl-lysine modification	42	2	0.81	1.00000
246	GO:0006757	ATP generation from ADP	68	1	1.32	1.00000
247	GO:0030203	glycosaminoglycan metabolic process	38	5	0.74	1.00000
248	GO:0019318	hexose metabolic process	83	2	1.61	1.00000
249	GO:0018208	peptidyl-proline modification	36	1	0.7	1.00000
250	GO:0051171	regulation of nitrogen compound metaboli...	795	19	15.4	1.00000
251	GO:0051172	negative regulation of nitrogen compound...	32	2	0.62	1.00000
252	GO:0098742	cell-cell adhesion via plasma-membrane a...	27	1	0.52	1.00000
253	GO:0071822	protein complex subunit organization	162	7	3.14	1.00000
254	GO:0043543	protein acylation	24	1	0.46	1.00000
255	GO:0006323	DNA packaging	20	1	0.39	1.00000
256	GO:0031123	RNA 3'-end processing	18	2	0.35	1.00000
257	GO:0018393	internal peptidyl-lysine acetylation	24	1	0.46	1.00000
258	GO:0031124	mRNA 3'-end processing	9	2	0.17	1.00000
259	GO:0071824	protein-DNA complex subunit organization	29	1	0.56	1.00000
260	GO:0018394	peptidyl-lysine acetylation	24	1	0.46	1.00000
261	GO:0048519	negative regulation of biological proces...	125	4	2.42	1.00000
262	GO:0006325	chromatin organization	70	3	1.36	1.00000
263	GO:0071826	ribonucleoprotein complex subunit organi...	46	1	0.89	1.00000
264	GO:0055067	monovalent inorganic cation homeostasis	10	2	0.19	1.00000
265	GO:0016458	gene silencing	8	1	0.15	1.00000
266	GO:0051179	localization	2649	46	51.32	1.00000
267	GO:0048731	system development	12	1	0.23	1.00000
268	GO:0017148	negative regulation of translation	8	1	0.15	1.00000
269	GO:0033692	cellular polysaccharide biosynthetic pro...	40	1	0.77	1.00000
270	GO:0034728	nucleosome organization	15	1	0.29	1.00000
271	GO:0048545	response to steroid hormone	32	2	0.62	1.00000
272	GO:0042886	amide transport	420	13	8.14	1.00000
273	GO:0019725	cellular homeostasis	118	1	2.29	1.00000
274	GO:0140056	organelle localization by membrane tethe...	42	2	0.81	1.00000
275	GO:0018193	peptidyl-amino acid modification	95	4	1.84	1.00000
276	GO:0042221	response to chemical	87	3	1.69	1.00000
277	GO:1905114	cell surface receptor signaling pathway ...	32	1	0.62	1.00000
278	GO:0070085	glycosylation	72	3	1.39	1.00000
279	GO:0006581	acetylcholine catabolic process	3	1	0.06	1.00000
280	GO:0071840	cellular component organization or bioge...	698	19	13.52	1.00000
281	GO:0055080	cation homeostasis	22	2	0.43	1.00000
282	GO:0050801	ion homeostasis	23	2	0.45	1.00000
283	GO:0097033	mitochondrial respiratory chain complex ...	6	2	0.12	1.00000
284	GO:0055086	nucleobase-containing small molecule met...	474	4	9.18	1.00000
285	GO:0006112	energy reserve metabolic process	33	1	0.64	1.00000
286	GO:0006720	isoprenoid metabolic process	41	1	0.79	1.00000

## Sheet: Module 10
	GO.ID	Term	Annotated	Significant	Expected	Fisher
1	GO:0006511	ubiquitin-dependent protein catabolic pr...	153	34	7.42	4.9e-14
2	GO:0016579	protein deubiquitination	105	22	5.09	4.8e-09
3	GO:0006468	protein phosphorylation	871	81	42.24	9.0e-08
4	GO:0007034	vacuolar transport	10	6	0.48	2.3e-06
5	GO:0016567	protein ubiquitination	38	9	1.84	6.5e-05
6	GO:0006355	regulation of transcription, DNA-templat...	747	65	36.23	8.8e-05
7	GO:0035023	regulation of Rho protein signal transdu...	108	15	5.24	0.00022
8	GO:0006606	protein import into nucleus	10	4	0.48	0.00091
9	GO:0006886	intracellular protein transport	331	36	16.05	0.00148
10	GO:0007188	adenylate cyclase-modulating G-protein c...	2	2	0.1	0.00235
11	GO:0000079	regulation of cyclin-dependent protein s...	8	4	0.39	0.00342
12	GO:0007064	mitotic sister chromatid cohesion	7	3	0.34	0.00343
13	GO:0007165	signal transduction	1420	94	68.87	0.00490
14	GO:0006397	mRNA processing	142	13	6.89	0.00528
15	GO:0043085	positive regulation of catalytic activit...	10	5	0.48	0.00677
16	GO:0007264	small GTPase mediated signal transductio...	221	26	10.72	0.01188
17	GO:0007015	actin filament organization	24	5	1.16	0.01313
18	GO:0000290	deadenylation-dependent decapping of nuc...	4	2	0.19	0.01320
19	GO:0006309	apoptotic DNA fragmentation	4	2	0.19	0.01320
20	GO:0005992	trehalose biosynthetic process	11	3	0.53	0.01399
21	GO:0006821	chloride transport	11	3	0.53	0.01399
22	GO:0006357	regulation of transcription from RNA pol...	62	8	3.01	0.02056
23	GO:0043547	positive regulation of GTPase activity	5	2	0.24	0.02130
24	GO:0019835	cytolysis	5	2	0.24	0.02130
25	GO:0031175	neuron projection development	5	2	0.24	0.02130
26	GO:0006614	SRP-dependent cotranslational protein ta...	25	4	1.21	0.03082
27	GO:0035556	intracellular signal transduction	538	50	26.09	0.03106
28	GO:0007010	cytoskeleton organization	111	14	5.38	0.04118
29	GO:0006166	purine ribonucleoside salvage	7	2	0.34	0.04193
30	GO:0070588	calcium ion transmembrane transport	40	5	1.94	0.04284
31	GO:0016070	RNA metabolic process	1760	135	85.36	0.04690
32	GO:0006333	chromatin assembly or disassembly	16	2	0.78	0.04848
33	GO:0045737	positive regulation of cyclin-dependent ...	1	1	0.05	0.04850
34	GO:0051694	pointed-end actin filament capping	1	1	0.05	0.04850
35	GO:0032465	regulation of cytokinesis	1	1	0.05	0.04850
36	GO:0006172	ADP biosynthetic process	1	1	0.05	0.04850
37	GO:0006086	acetyl-CoA biosynthetic process from pyr...	1	1	0.05	0.04850
38	GO:0032981	mitochondrial respiratory chain complex ...	1	1	0.05	0.04850
39	GO:0051016	barbed-end actin filament capping	1	1	0.05	0.04850
40	GO:0006481	C-terminal protein methylation	1	1	0.05	0.04850
41	GO:0030036	actin cytoskeleton organization	42	8	2.04	0.05314
42	GO:0016042	lipid catabolic process	20	3	0.97	0.05409
43	GO:0006289	nucleotide-excision repair	30	4	1.45	0.05530
44	GO:0006457	protein folding	134	11	6.5	0.06109
45	GO:0001510	RNA methylation	31	5	1.5	0.06710
46	GO:0043401	steroid hormone mediated signaling pathw...	32	4	1.55	0.06733
47	GO:0046856	phosphatidylinositol dephosphorylation	20	3	0.97	0.07008
48	GO:0010508	positive regulation of autophagy	10	2	0.48	0.08164
49	GO:0032007	negative regulation of TOR signaling	10	2	0.48	0.08164
50	GO:0006812	cation transport	413	21	20.03	0.08497
51	GO:0034470	ncRNA processing	196	15	9.51	0.09405
52	GO:0016072	rRNA metabolic process	50	7	2.42	0.09418
53	GO:0019722	calcium-mediated signaling	2	1	0.1	0.09465
54	GO:0000122	negative regulation of transcription fro...	2	1	0.1	0.09465
55	GO:0016973	poly(A)+ mRNA export from nucleus	2	1	0.1	0.09465
56	GO:0016925	protein sumoylation	2	1	0.1	0.09465
57	GO:0006120	mitochondrial electron transport, NADH t...	2	1	0.1	0.09465
58	GO:0006122	mitochondrial electron transport, ubiqui...	2	1	0.1	0.09465
59	GO:0030148	sphingolipid biosynthetic process	2	1	0.1	0.09465
60	GO:0016075	rRNA catabolic process	2	1	0.1	0.09465
61	GO:0009229	thiamine diphosphate biosynthetic proces...	2	1	0.1	0.09465
62	GO:0090116	C-5 methylation of cytosine	2	1	0.1	0.09465
63	GO:0031167	rRNA methylation	2	1	0.1	0.09465
64	GO:0034968	histone lysine methylation	11	2	0.53	0.09668
65	GO:0045454	cell redox homeostasis	98	8	4.75	0.10290
66	GO:0000042	protein targeting to Golgi	12	2	0.58	0.11241
67	GO:0006413	translational initiation	39	4	1.89	0.11881
68	GO:0007018	microtubule-based movement	119	9	5.77	0.12390
69	GO:0030150	protein import into mitochondrial matrix	3	1	0.15	0.13857
70	GO:0006884	cell volume homeostasis	3	1	0.15	0.13857
71	GO:0000289	nuclear-transcribed mRNA poly(A) tail sh...	3	1	0.15	0.13857
72	GO:0006423	cysteinyl-tRNA aminoacylation	3	1	0.15	0.13857
73	GO:0006414	translational elongation	54	5	2.62	0.14463
74	GO:0006351	transcription, DNA-templated	943	80	45.74	0.15278
75	GO:0006914	autophagy	25	4	1.21	0.16230
76	GO:0006396	RNA processing	504	40	24.44	0.17823
77	GO:0006401	RNA catabolic process	50	7	2.42	0.17947
78	GO:0006419	alanyl-tRNA aminoacylation	16	2	0.78	0.18044
79	GO:0006013	mannose metabolic process	17	2	0.82	0.19830
80	GO:0006367	transcription initiation from RNA polyme...	18	2	0.87	0.21636
81	GO:0006816	calcium ion transport	45	6	2.18	0.21926
82	GO:0008380	RNA splicing	94	6	4.56	0.21993
83	GO:0006672	ceramide metabolic process	5	1	0.24	0.22012
84	GO:0017183	peptidyl-diphthamide biosynthetic proces...	5	1	0.24	0.22012
85	GO:0007016	cytoskeletal anchoring at plasma membran...	5	1	0.24	0.22012
86	GO:0008203	cholesterol metabolic process	5	1	0.24	0.22012
87	GO:0016559	peroxisome fission	5	1	0.24	0.22012
88	GO:0035065	regulation of histone acetylation	5	1	0.24	0.22012
89	GO:0006437	tyrosyl-tRNA aminoacylation	5	1	0.24	0.22012
90	GO:0006099	tricarboxylic acid cycle	19	2	0.92	0.23455
91	GO:0008033	tRNA processing	144	8	6.98	0.25225
92	GO:0015696	ammonium transport	6	1	0.29	0.25795
93	GO:0018344	protein geranylgeranylation	6	1	0.29	0.25795
94	GO:0032786	positive regulation of DNA-templated tra...	6	1	0.29	0.25795
95	GO:0007009	plasma membrane organization	6	1	0.29	0.25795
96	GO:0030071	regulation of mitotic metaphase/anaphase...	6	1	0.29	0.25795
97	GO:0071929	alpha-tubulin acetylation	6	1	0.29	0.25795
98	GO:0006379	mRNA cleavage	6	1	0.29	0.25795
99	GO:0006275	regulation of DNA replication	6	1	0.29	0.25795
100	GO:0048280	vesicle fusion with Golgi apparatus	6	1	0.29	0.25795
101	GO:0016311	dephosphorylation	164	12	7.95	0.26440
102	GO:0006364	rRNA processing	46	5	2.23	0.26530
103	GO:0045892	negative regulation of transcription, DN...	23	3	1.12	0.27065
104	GO:0006807	nitrogen compound metabolic process	6768	382	328.25	0.28023
105	GO:0007205	protein kinase C-activating G-protein co...	22	2	1.07	0.28942
106	GO:0000154	rRNA modification	9	2	0.44	0.29364
107	GO:0007031	peroxisome organization	12	2	0.58	0.29369
108	GO:0000724	double-strand break repair via homologou...	7	1	0.34	0.29396
109	GO:0006772	thiamine metabolic process	7	1	0.34	0.29396
110	GO:0009156	ribonucleoside monophosphate biosyntheti...	62	3	3.01	0.29419
111	GO:0006366	transcription from RNA polymerase II pro...	95	12	4.61	0.32560
112	GO:0016180	snRNA processing	8	1	0.39	0.32822
113	GO:0006857	oligopeptide transport	8	1	0.39	0.32822
114	GO:0007349	cellularization	8	1	0.39	0.32822
115	GO:0009395	phospholipid catabolic process	8	1	0.39	0.32822
116	GO:0070481	nuclear-transcribed mRNA catabolic proce...	8	1	0.39	0.32822
117	GO:0033227	dsRNA transport	8	1	0.39	0.32822
118	GO:0006207	'de novo' pyrimidine nucleobase biosynth...	8	1	0.39	0.32822
119	GO:0071025	RNA surveillance	8	1	0.39	0.32822
120	GO:0070966	nuclear-transcribed mRNA catabolic proce...	8	1	0.39	0.32822
121	GO:0051205	protein insertion into membrane	8	1	0.39	0.32822
122	GO:0008053	mitochondrial fusion	8	1	0.39	0.32822
123	GO:0080009	mRNA methylation	8	1	0.39	0.32822
124	GO:0015031	protein transport	397	40	19.25	0.33479
125	GO:0006432	phenylalanyl-tRNA aminoacylation	25	2	1.21	0.34380
126	GO:0009435	NAD biosynthetic process	9	1	0.44	0.36081
127	GO:0051262	protein tetramerization	9	1	0.44	0.36081
128	GO:0031124	mRNA 3'-end processing	9	1	0.44	0.36081
129	GO:0015991	ATP hydrolysis coupled proton transport	45	3	2.18	0.37382
130	GO:0007156	homophilic cell adhesion via plasma memb...	27	2	1.31	0.37932
131	GO:0030163	protein catabolic process	190	36	9.21	0.38022
132	GO:0006177	GMP biosynthetic process	10	1	0.48	0.39183
133	GO:0043248	proteasome assembly	10	1	0.48	0.39183
134	GO:0000387	spliceosomal snRNP assembly	10	1	0.48	0.39183
135	GO:0009263	deoxyribonucleotide biosynthetic process	10	1	0.48	0.39183
136	GO:0051321	meiotic cell cycle	10	1	0.48	0.39183
137	GO:0015992	proton transport	85	4	4.12	0.39211
138	GO:0006820	anion transport	216	7	10.48	0.39359
139	GO:0006072	glycerol-3-phosphate metabolic process	29	2	1.41	0.41400
140	GO:0006470	protein dephosphorylation	107	6	5.19	0.41813
141	GO:0007179	transforming growth factor beta receptor...	11	1	0.53	0.42135
142	GO:0015914	phospholipid transport	11	1	0.53	0.42135
143	GO:0051276	chromosome organization	176	14	8.54	0.43523
144	GO:0016192	vesicle-mediated transport	296	15	14.36	0.43590
145	GO:0007154	cell communication	1433	95	69.5	0.43625
146	GO:0043087	regulation of GTPase activity	36	4	1.75	0.44641
147	GO:0000390	spliceosomal complex disassembly	12	1	0.58	0.44944
148	GO:0034314	Arp2/3 complex-mediated actin nucleation	12	1	0.58	0.44944
149	GO:0006388	tRNA splicing, via endonucleolytic cleav...	12	1	0.58	0.44944
150	GO:0030488	tRNA methylation	12	1	0.58	0.44944
151	GO:0006486	protein glycosylation	70	4	3.39	0.45251
152	GO:0009966	regulation of signal transduction	189	20	9.17	0.45638
153	GO:0006368	transcription elongation from RNA polyme...	13	1	0.63	0.47616
154	GO:0006541	glutamine metabolic process	13	1	0.63	0.47616
155	GO:0007020	microtubule nucleation	34	2	1.65	0.49609
156	GO:0016485	protein processing	14	1	0.68	0.50159
157	GO:0051301	cell division	16	2	0.78	0.52530
158	GO:0045944	positive regulation of transcription fro...	15	1	0.73	0.52578
159	GO:0006334	nucleosome assembly	15	1	0.73	0.52578
160	GO:0032012	regulation of ARF protein signal transdu...	15	1	0.73	0.52578
161	GO:0000413	protein peptidyl-prolyl isomerization	36	2	1.75	0.52682
162	GO:0007155	cell adhesion	106	6	5.14	0.53680
163	GO:0007275	multicellular organism development	57	5	2.76	0.54014
164	GO:0016570	histone modification	45	4	2.18	0.54798
165	GO:0048193	Golgi vesicle transport	73	5	3.54	0.54817
166	GO:0006383	transcription from RNA polymerase III pr...	16	1	0.78	0.54881
167	GO:0009452	7-methylguanosine RNA capping	16	1	0.78	0.54881
168	GO:0046907	intracellular transport	390	44	18.91	0.56417
169	GO:0051726	regulation of cell cycle	47	7	2.28	0.56834
170	GO:0006744	ubiquinone biosynthetic process	17	1	0.82	0.57071
171	GO:0000184	nuclear-transcribed mRNA catabolic proce...	18	1	0.87	0.59156
172	GO:0009298	GDP-mannose biosynthetic process	18	1	0.87	0.59156
173	GO:0051056	regulation of small GTPase mediated sign...	142	17	6.89	0.60604
174	GO:0051260	protein homooligomerization	19	1	0.92	0.61139
175	GO:0006487	protein N-linked glycosylation	19	1	0.92	0.61139
176	GO:0006633	fatty acid biosynthetic process	20	1	0.97	0.63026
177	GO:0006352	DNA-templated transcription, initiation	62	4	3.01	0.63571
178	GO:0006810	transport	2608	124	126.49	0.65387
179	GO:0000226	microtubule cytoskeleton organization	57	3	2.76	0.66515
180	GO:0007049	cell cycle	117	12	5.67	0.67816
181	GO:0006479	protein methylation	36	4	1.75	0.69577
182	GO:0006415	translational termination	24	1	1.16	0.69703
183	GO:0006298	mismatch repair	25	1	1.21	0.71175
184	GO:0006750	glutathione biosynthetic process	25	1	1.21	0.71175
185	GO:0007169	transmembrane receptor protein tyrosine ...	25	1	1.21	0.71175
186	GO:0051603	proteolysis involved in cellular protein...	180	35	8.73	0.72526
187	GO:0006915	apoptotic process	32	3	1.55	0.75086
188	GO:0006888	ER to Golgi vesicle-mediated transport	28	1	1.36	0.75175
189	GO:0000398	mRNA splicing, via spliceosome	77	4	3.73	0.75293
190	GO:0009165	nucleotide biosynthetic process	248	6	12.03	0.76659
191	GO:0006629	lipid metabolic process	449	17	21.78	0.79266
192	GO:0006836	neurotransmitter transport	86	3	4.17	0.79394
193	GO:0006869	lipid transport	98	4	4.75	0.79999
194	GO:0006779	porphyrin-containing compound biosynthet...	34	1	1.65	0.81590
195	GO:0006139	nucleobase-containing compound metabolic...	3383	179	164.07	0.82424
196	GO:0006265	DNA topological change	38	1	1.84	0.84917
197	GO:0006313	transposition, DNA-mediated	199	7	9.65	0.85457
198	GO:0048278	vesicle docking	42	1	2.04	0.87644
199	GO:0006281	DNA repair	260	12	12.61	0.87929
200	GO:0003333	amino acid transmembrane transport	74	2	3.59	0.88014
201	GO:0006270	DNA replication initiation	46	1	2.23	0.89878
202	GO:0044255	cellular lipid metabolic process	269	9	13.05	0.89973
203	GO:0009116	nucleoside metabolic process	95	4	4.61	0.91261
204	GO:0006400	tRNA modification	62	2	3.01	0.91697
205	GO:0006887	exocytosis	54	1	2.62	0.93209
206	GO:0044237	cellular metabolic process	6452	374	312.92	0.95125
207	GO:0006813	potassium ion transport	98	2	4.75	0.95458
208	GO:0006464	cellular protein modification process	1466	135	71.1	0.96015
209	GO:0030001	metal ion transport	257	10	12.46	0.96144
210	GO:0006520	cellular amino acid metabolic process	429	9	20.81	0.96255
211	GO:0006030	chitin metabolic process	71	1	3.44	0.97094
212	GO:0006412	translation	737	29	35.74	0.97973
213	GO:0006508	proteolysis	1020	64	49.47	0.98151
214	GO:0046488	phosphatidylinositol metabolic process	103	4	5	0.98385
215	GO:0009190	cyclic nucleotide biosynthetic process	85	1	4.12	0.98557
216	GO:0006950	response to stress	401	14	19.45	0.98630
217	GO:0007166	cell surface receptor signaling pathway	171	4	8.29	0.98976
218	GO:0055085	transmembrane transport	1139	41	55.24	0.99127
219	GO:0006310	DNA recombination	308	9	14.94	0.99393
220	GO:0046034	ATP metabolic process	115	3	5.58	0.99514
221	GO:0006811	ion transport	865	32	41.95	0.99748
222	GO:0009058	biosynthetic process	2947	137	142.93	0.99843
223	GO:0016310	phosphorylation	1029	84	49.91	0.99912
224	GO:0006418	tRNA aminoacylation for protein translat...	212	7	10.28	0.99970
225	GO:0006260	DNA replication	236	3	11.45	0.99974
226	GO:0007186	G-protein coupled receptor signaling pat...	397	10	19.25	0.99978
227	GO:0015074	DNA integration	359	4	17.41	0.99998
228	GO:0005975	carbohydrate metabolic process	736	10	35.7	1.00000
229	GO:0008152	metabolic process	10111	456	490.38	1.00000
230	GO:0055114	oxidation-reduction process	1668	38	80.9	1.00000
231	GO:0046128	purine ribonucleoside metabolic process	41	3	1.99	1.00000
232	GO:0046129	purine ribonucleoside biosynthetic proce...	31	3	1.5	1.00000
233	GO:0044257	cellular protein catabolic process	180	35	8.73	1.00000
234	GO:2000765	regulation of cytoplasmic translation	5	1	0.24	1.00000
235	GO:0008361	regulation of cell size	3	1	0.15	1.00000
236	GO:0010646	regulation of cell communication	190	20	9.21	1.00000
237	GO:0048522	positive regulation of cellular process	69	6	3.35	1.00000
238	GO:0048523	negative regulation of cellular process	81	7	3.93	1.00000
239	GO:0010648	negative regulation of cell communicatio...	13	2	0.63	1.00000
240	GO:0140056	organelle localization by membrane tethe...	42	1	2.04	1.00000
241	GO:0046112	nucleobase biosynthetic process	15	1	0.73	1.00000
242	GO:0000910	cytokinesis	1	1	0.05	1.00000
243	GO:0044281	small molecule metabolic process	1237	29	59.99	1.00000
244	GO:0012501	programmed cell death	32	3	1.55	1.00000
245	GO:0120036	plasma membrane bounded cell projection ...	18	2	0.87	1.00000
246	GO:0044283	small molecule biosynthetic process	225	2	10.91	1.00000
247	GO:0006743	ubiquinone metabolic process	17	1	0.82	1.00000
248	GO:0019693	ribose phosphate metabolic process	256	5	12.42	1.00000
249	GO:0034637	cellular carbohydrate biosynthetic proce...	67	3	3.25	1.00000
250	GO:0046903	secretion	83	1	4.03	1.00000
251	GO:0007178	transmembrane receptor protein serine/th...	13	1	0.63	1.00000
252	GO:1901575	organic substance catabolic process	504	48	24.44	1.00000
253	GO:1901576	organic substance biosynthetic process	2793	136	135.46	1.00000
254	GO:0006402	mRNA catabolic process	44	5	2.13	1.00000
255	GO:0019752	carboxylic acid metabolic process	607	13	29.44	1.00000
256	GO:0006403	RNA localization	17	2	0.82	1.00000
257	GO:0022900	electron transport chain	19	2	0.92	1.00000
258	GO:0006749	glutathione metabolic process	43	1	2.09	1.00000
259	GO:0006405	RNA export from nucleus	5	1	0.24	1.00000
260	GO:2000756	regulation of peptidyl-lysine acetylatio...	5	1	0.24	1.00000
261	GO:0006406	mRNA export from nucleus	5	1	0.24	1.00000
262	GO:0010638	positive regulation of organelle organiz...	16	1	0.78	1.00000
263	GO:0022904	respiratory electron transport chain	15	2	0.73	1.00000
264	GO:0010639	negative regulation of organelle organiz...	13	2	0.63	1.00000
265	GO:0017182	peptidyl-diphthamide metabolic process	5	1	0.24	1.00000
266	GO:0048518	positive regulation of biological proces...	74	6	3.59	1.00000
267	GO:0044270	cellular nitrogen compound catabolic pro...	111	9	5.38	1.00000
268	GO:0048519	negative regulation of biological proces...	125	12	6.06	1.00000
269	GO:0044271	cellular nitrogen compound biosynthetic ...	2145	122	104.03	1.00000
270	GO:0006732	coenzyme metabolic process	194	4	9.41	1.00000
271	GO:0044272	sulfur compound biosynthetic process	57	3	2.76	1.00000
272	GO:0006733	oxidoreduction coenzyme metabolic proces...	118	2	5.72	1.00000
273	GO:0071495	cellular response to endogenous stimulus	49	5	2.38	1.00000
274	GO:0009725	response to hormone	36	4	1.75	1.00000
275	GO:0043101	purine-containing compound salvage	10	2	0.48	1.00000
276	GO:0048545	response to steroid hormone	32	4	1.55	1.00000
277	GO:0018022	peptidyl-lysine methylation	11	2	0.53	1.00000
278	GO:0031323	regulation of cellular metabolic process	806	73	39.09	1.00000
279	GO:0031324	negative regulation of cellular metaboli...	36	3	1.75	1.00000
280	GO:0031325	positive regulation of cellular metaboli...	42	5	2.04	1.00000
281	GO:0006626	protein targeting to mitochondrion	14	1	0.68	1.00000
282	GO:0031326	regulation of cellular biosynthetic proc...	773	67	37.49	1.00000
283	GO:0009653	anatomical structure morphogenesis	9	1	0.44	1.00000
284	GO:0031327	negative regulation of cellular biosynth...	32	3	1.55	1.00000
285	GO:0031328	positive regulation of cellular biosynth...	26	2	1.26	1.00000
286	GO:0031329	regulation of cellular catabolic process	10	2	0.48	1.00000
287	GO:0007091	metaphase/anaphase transition of mitotic...	6	1	0.29	1.00000
288	GO:0052646	alditol phosphate metabolic process	29	2	1.41	1.00000
289	GO:0009719	response to endogenous stimulus	50	5	2.42	1.00000
290	GO:0006611	protein export from nucleus	5	1	0.24	1.00000
291	GO:0006612	protein targeting to membrane	25	4	1.21	1.00000
292	GO:0051693	actin filament capping	2	2	0.1	1.00000
293	GO:0006613	cotranslational protein targeting to mem...	25	4	1.21	1.00000
294	GO:0042180	cellular ketone metabolic process	25	1	1.21	1.00000
295	GO:0090304	nucleic acid metabolic process	2819	164	136.72	1.00000
296	GO:0019438	aromatic compound biosynthetic process	1353	91	65.62	1.00000
297	GO:0032535	regulation of cellular component size	21	4	1.02	1.00000
298	GO:0090305	nucleic acid phosphodiester bond hydroly...	12	3	0.58	1.00000
299	GO:0042181	ketone biosynthetic process	18	1	0.87	1.00000
300	GO:0019439	aromatic compound catabolic process	107	9	5.19	1.00000
301	GO:0033993	response to lipid	32	4	1.55	1.00000
302	GO:0072655	establishment of protein localization to...	14	1	0.68	1.00000
303	GO:0072657	protein localization to membrane	33	5	1.6	1.00000
304	GO:0010604	positive regulation of macromolecule met...	32	3	1.55	1.00000
305	GO:0010605	negative regulation of macromolecule met...	76	8	3.69	1.00000
306	GO:0019725	cellular homeostasis	118	9	5.72	1.00000
307	GO:0140014	mitotic nuclear division	18	4	0.87	1.00000
308	GO:0010608	posttranscriptional regulation of gene e...	20	1	0.97	1.00000
309	GO:0098660	inorganic ion transmembrane transport	153	8	7.42	1.00000
310	GO:0098662	inorganic cation transmembrane transport	152	8	7.37	1.00000
311	GO:0070887	cellular response to chemical stimulus	58	5	2.81	1.00000
312	GO:0006643	membrane lipid metabolic process	46	2	2.23	1.00000
313	GO:0006644	phospholipid metabolic process	180	5	8.73	1.00000
314	GO:0046390	ribose phosphate biosynthetic process	144	2	6.98	1.00000
315	GO:0044242	cellular lipid catabolic process	12	1	0.58	1.00000
316	GO:0051783	regulation of nuclear division	8	1	0.39	1.00000
317	GO:0046394	carboxylic acid biosynthetic process	130	1	6.3	1.00000
318	GO:0044248	cellular catabolic process	399	49	19.35	1.00000
319	GO:0048468	cell development	5	2	0.24	1.00000
320	GO:0044249	cellular biosynthetic process	2768	136	134.25	1.00000
321	GO:1902652	secondary alcohol metabolic process	5	1	0.24	1.00000
322	GO:0006974	cellular response to DNA damage stimulus	272	12	13.19	1.00000
323	GO:0006631	fatty acid metabolic process	30	1	1.45	1.00000
324	GO:0031331	positive regulation of cellular cataboli...	10	2	0.48	1.00000
325	GO:0031333	negative regulation of protein complex a...	2	2	0.1	1.00000
326	GO:0031334	positive regulation of protein complex a...	16	1	0.78	1.00000
327	GO:0098655	cation transmembrane transport	152	8	7.37	1.00000
328	GO:0098656	anion transmembrane transport	82	2	3.98	1.00000
329	GO:0006637	acyl-CoA metabolic process	10	1	0.48	1.00000
330	GO:0045893	positive regulation of transcription, DN...	19	2	0.92	1.00000
331	GO:0009968	negative regulation of signal transducti...	13	2	0.63	1.00000
332	GO:0007062	sister chromatid cohesion	7	3	0.34	1.00000
333	GO:0044238	primary metabolic process	7459	402	361.76	1.00000
334	GO:1902680	positive regulation of RNA biosynthetic ...	19	2	0.92	1.00000
335	GO:0033674	positive regulation of kinase activity	1	1	0.05	1.00000
336	GO:0006921	cellular component disassembly involved ...	4	2	0.19	1.00000
337	GO:0032501	multicellular organismal process	156	5	7.57	1.00000
338	GO:0032502	developmental process	58	5	2.81	1.00000
339	GO:0006928	movement of cell or subcellular componen...	138	9	6.69	1.00000
340	GO:0046839	phospholipid dephosphorylation	20	3	0.97	1.00000
341	GO:1904029	regulation of cyclin-dependent protein k...	8	4	0.39	1.00000
342	GO:0098742	cell-cell adhesion via plasma-membrane a...	27	2	1.31	1.00000
343	GO:0043043	peptide biosynthetic process	763	30	37.01	1.00000
344	GO:0032507	maintenance of protein location in cell	6	1	0.29	1.00000
345	GO:0019673	GDP-mannose metabolic process	22	1	1.07	1.00000
346	GO:0019674	NAD metabolic process	14	1	0.68	1.00000
347	GO:0006163	purine nucleotide metabolic process	260	5	12.61	1.00000
348	GO:0006164	purine nucleotide biosynthetic process	155	2	7.52	1.00000
349	GO:0045184	establishment of protein localization	405	41	19.64	1.00000
350	GO:0007399	nervous system development	5	2	0.24	1.00000
351	GO:0045185	maintenance of protein location	6	1	0.29	1.00000
352	GO:0006913	nucleocytoplasmic transport	21	5	1.02	1.00000
353	GO:0015698	inorganic anion transport	72	3	3.49	1.00000
354	GO:0045934	negative regulation of nucleobase-contai...	24	3	1.16	1.00000
355	GO:0007059	chromosome segregation	25	4	1.21	1.00000
356	GO:0045935	positive regulation of nucleobase-contai...	19	2	0.92	1.00000
357	GO:0051651	maintenance of location in cell	6	1	0.29	1.00000
358	GO:0045937	positive regulation of phosphate metabol...	5	1	0.24	1.00000
359	GO:0014070	response to organic cyclic compound	32	4	1.55	1.00000
360	GO:0009199	ribonucleoside triphosphate metabolic pr...	139	3	6.74	1.00000
361	GO:1902679	negative regulation of RNA biosynthetic ...	23	3	1.12	1.00000
362	GO:0006891	intra-Golgi vesicle-mediated transport	23	2	1.12	1.00000
363	GO:0042886	amide transport	420	41	20.37	1.00000
364	GO:0009987	cellular process	8565	523	415.4	1.00000
365	GO:0051716	cellular response to stimulus	1696	106	82.26	1.00000
366	GO:0065002	intracellular protein transmembrane tran...	4	1	0.19	1.00000
367	GO:0065003	macromolecular complex assembly	198	11	9.6	1.00000
368	GO:0065004	protein-DNA complex assembly	29	1	1.41	1.00000
369	GO:0043038	amino acid activation	219	7	10.62	1.00000
370	GO:0043039	tRNA aminoacylation	219	7	10.62	1.00000
371	GO:0018342	protein prenylation	28	1	1.36	1.00000
372	GO:0065007	biological regulation	2472	183	119.89	1.00000
373	GO:0065008	regulation of biological quality	195	13	9.46	1.00000
374	GO:0061024	membrane organization	38	4	1.84	1.00000
375	GO:0007088	regulation of mitotic nuclear division	8	1	0.39	1.00000
376	GO:0065009	regulation of molecular function	66	10	3.2	1.00000
377	GO:0061025	membrane fusion	14	2	0.68	1.00000
378	GO:0045860	positive regulation of protein kinase ac...	1	1	0.05	1.00000
379	GO:0070848	response to growth factor	17	1	0.82	1.00000
380	GO:0046351	disaccharide biosynthetic process	12	3	0.58	1.00000
381	GO:0006605	protein targeting	58	7	2.81	1.00000
382	GO:0005991	trehalose metabolic process	20	3	0.97	1.00000
383	GO:0071426	ribonucleoprotein complex export from nu...	5	1	0.24	1.00000
384	GO:0005996	monosaccharide metabolic process	87	2	4.22	1.00000
385	GO:0071427	mRNA-containing ribonucleoprotein comple...	5	1	0.24	1.00000
386	GO:0008213	protein alkylation	36	4	1.75	1.00000
387	GO:0070085	glycosylation	72	4	3.49	1.00000
388	GO:1904031	positive regulation of cyclin-dependent ...	1	1	0.05	1.00000
389	GO:0030154	cell differentiation	6	2	0.29	1.00000
390	GO:0043254	regulation of protein complex assembly	18	3	0.87	1.00000
391	GO:0008219	cell death	33	3	1.6	1.00000
392	GO:0010876	lipid localization	103	4	5	1.00000
393	GO:0070838	divalent metal ion transport	57	6	2.76	1.00000
394	GO:0000819	sister chromatid segregation	16	4	0.78	1.00000
395	GO:0048699	generation of neurons	5	2	0.24	1.00000
396	GO:0000394	RNA splicing, via endonucleolytic cleava...	12	1	0.58	1.00000
397	GO:0009161	ribonucleoside monophosphate metabolic p...	144	6	6.98	1.00000
398	GO:0045859	regulation of protein kinase activity	8	4	0.39	1.00000
399	GO:0030182	neuron differentiation	5	2	0.24	1.00000
400	GO:0009163	nucleoside biosynthetic process	35	3	1.7	1.00000
401	GO:0009167	purine ribonucleoside monophosphate meta...	137	5	6.64	1.00000
402	GO:0009168	purine ribonucleoside monophosphate bios...	55	2	2.67	1.00000
403	GO:0034067	protein localization to Golgi apparatus	12	2	0.58	1.00000
404	GO:0032784	regulation of DNA-templated transcriptio...	7	1	0.34	1.00000
405	GO:0009890	negative regulation of biosynthetic proc...	32	3	1.55	1.00000
406	GO:0006865	amino acid transport	82	2	3.98	1.00000
407	GO:0046031	ADP metabolic process	69	1	3.35	1.00000
408	GO:0090501	RNA phosphodiester bond hydrolysis	8	1	0.39	1.00000
409	GO:0009891	positive regulation of biosynthetic proc...	26	2	1.26	1.00000
410	GO:0009892	negative regulation of metabolic process	80	8	3.88	1.00000
411	GO:0032787	monocarboxylic acid metabolic process	125	2	6.06	1.00000
412	GO:0019637	organophosphate metabolic process	648	17	31.43	1.00000
413	GO:0009893	positive regulation of metabolic process	42	5	2.04	1.00000
414	GO:0009150	purine ribonucleotide metabolic process	238	5	11.54	1.00000
415	GO:0009894	regulation of catabolic process	13	2	0.63	1.00000
416	GO:1903825	organic acid transmembrane transport	80	2	3.88	1.00000
417	GO:0015711	organic anion transport	133	3	6.45	1.00000
418	GO:0009152	purine ribonucleotide biosynthetic proce...	140	2	6.79	1.00000
419	GO:0032446	protein modification by small protein co...	45	10	2.18	1.00000
420	GO:0009896	positive regulation of catabolic process	10	2	0.48	1.00000
421	GO:0007017	microtubule-based process	217	12	10.52	1.00000
422	GO:0046037	GMP metabolic process	10	1	0.48	1.00000
423	GO:0042398	cellular modified amino acid biosyntheti...	35	1	1.7	1.00000
424	GO:0031497	chromatin assembly	15	1	0.73	1.00000
425	GO:0032774	RNA biosynthetic process	952	80	46.17	1.00000
426	GO:0000070	mitotic sister chromatid segregation	16	4	0.78	1.00000
427	GO:0032776	DNA methylation on cytosine	2	1	0.1	1.00000
428	GO:0009180	purine ribonucleoside diphosphate biosyn...	1	1	0.05	1.00000
429	GO:0051983	regulation of chromosome segregation	6	1	0.29	1.00000
430	GO:0051640	organelle localization	44	1	2.13	1.00000
431	GO:0006090	pyruvate metabolic process	72	1	3.49	1.00000
432	GO:0051641	cellular localization	450	47	21.82	1.00000
433	GO:0006091	generation of precursor metabolites and ...	144	4	6.98	1.00000
434	GO:0009185	ribonucleoside diphosphate metabolic pro...	69	1	3.35	1.00000
435	GO:0006119	oxidative phosphorylation	8	2	0.39	1.00000
436	GO:0048666	neuron development	5	2	0.24	1.00000
437	GO:0006906	vesicle fusion	6	1	0.29	1.00000
438	GO:0009187	cyclic nucleotide metabolic process	85	1	4.12	1.00000
439	GO:0009188	ribonucleoside diphosphate biosynthetic ...	1	1	0.05	1.00000
440	GO:0072600	establishment of protein localization to...	12	2	0.58	1.00000
441	GO:0015748	organophosphate ester transport	11	1	0.53	1.00000
442	GO:0051649	establishment of localization in cell	391	44	18.96	1.00000
443	GO:0015672	monovalent inorganic cation transport	243	6	11.79	1.00000
444	GO:0016125	sterol metabolic process	5	1	0.24	1.00000
445	GO:0019941	modification-dependent protein catabolic...	153	34	7.42	1.00000
446	GO:0097435	supramolecular fiber organization	58	7	2.81	1.00000
447	GO:0007265	Ras protein signal transduction	124	16	6.01	1.00000
448	GO:0009179	purine ribonucleoside diphosphate metabo...	69	1	3.35	1.00000
449	GO:1901661	quinone metabolic process	18	1	0.87	1.00000
450	GO:0007266	Rho protein signal transduction	109	15	5.29	1.00000
451	GO:1901663	quinone biosynthetic process	18	1	0.87	1.00000
452	GO:0110053	regulation of actin filament organizatio...	18	3	0.87	1.00000
453	GO:0005984	disaccharide metabolic process	21	3	1.02	1.00000
454	GO:0008202	steroid metabolic process	5	1	0.24	1.00000
455	GO:1902600	hydrogen ion transmembrane transport	75	3	3.64	1.00000
456	GO:0043241	protein complex disassembly	29	3	1.41	1.00000
457	GO:0043242	negative regulation of protein complex d...	2	2	0.1	1.00000
458	GO:0009123	nucleoside monophosphate metabolic proce...	146	6	7.08	1.00000
459	GO:1901990	regulation of mitotic cell cycle phase t...	8	1	0.39	1.00000
460	GO:0009124	nucleoside monophosphate biosynthetic pr...	64	3	3.1	1.00000
461	GO:0043244	regulation of protein complex disassembl...	10	2	0.48	1.00000
462	GO:0019184	nonribosomal peptide biosynthetic proces...	26	1	1.26	1.00000
463	GO:0019932	second-messenger-mediated signaling	2	1	0.1	1.00000
464	GO:0009126	purine nucleoside monophosphate metaboli...	137	5	6.64	1.00000
465	GO:0009127	purine nucleoside monophosphate biosynth...	55	2	2.67	1.00000
466	GO:0022008	neurogenesis	5	2	0.24	1.00000
467	GO:0098609	cell-cell adhesion	27	2	1.31	1.00000
468	GO:0071407	cellular response to organic cyclic comp...	32	4	1.55	1.00000
469	GO:1901657	glycosyl compound metabolic process	95	4	4.61	1.00000
470	GO:1901659	glycosyl compound biosynthetic process	35	3	1.7	1.00000
471	GO:0002181	cytoplasmic translation	5	1	0.24	1.00000
472	GO:0002182	cytoplasmic translational elongation	5	1	0.24	1.00000
473	GO:0009112	nucleobase metabolic process	21	1	1.02	1.00000
474	GO:0042357	thiamine diphosphate metabolic process	2	1	0.1	1.00000
475	GO:0051168	nuclear export	5	1	0.24	1.00000
476	GO:0017038	protein import	18	5	0.87	1.00000
477	GO:0051169	nuclear transport	21	5	1.02	1.00000
478	GO:0097659	nucleic acid-templated transcription	943	80	45.74	1.00000
479	GO:0048731	system development	12	2	0.58	1.00000
480	GO:0009117	nucleotide metabolic process	408	9	19.79	1.00000
481	GO:0015980	energy derivation by oxidation of organi...	72	4	3.49	1.00000
482	GO:0009119	ribonucleoside metabolic process	46	3	2.23	1.00000
483	GO:0006066	alcohol metabolic process	51	1	2.47	1.00000
484	GO:0000375	RNA splicing, via transesterification re...	77	4	3.73	1.00000
485	GO:0007346	regulation of mitotic cell cycle	11	1	0.53	1.00000
486	GO:0018202	peptidyl-histidine modification	5	1	0.24	1.00000
487	GO:0000377	RNA splicing, via transesterification re...	77	4	3.73	1.00000
488	GO:0015988	energy coupled proton transmembrane tran...	45	3	2.18	1.00000
489	GO:0006818	hydrogen transport	85	4	4.12	1.00000
490	GO:0018205	peptidyl-lysine modification	42	5	2.04	1.00000
491	GO:0007005	mitochondrion organization	44	3	2.13	1.00000
492	GO:0009141	nucleoside triphosphate metabolic proces...	149	3	7.23	1.00000
493	GO:0018208	peptidyl-proline modification	36	2	1.75	1.00000
494	GO:0009144	purine nucleoside triphosphate metabolic...	137	3	6.64	1.00000
495	GO:0009889	regulation of biosynthetic process	773	67	37.49	1.00000
496	GO:0051604	protein maturation	26	1	1.26	1.00000
497	GO:0006399	tRNA metabolic process	363	15	17.61	1.00000
498	GO:0044784	metaphase/anaphase transition of cell cy...	6	1	0.29	1.00000
499	GO:0006101	citrate metabolic process	19	2	0.92	1.00000
500	GO:0090662	ATP hydrolysis coupled transmembrane tra...	45	3	2.18	1.00000
501	GO:0051186	cofactor metabolic process	251	5	12.17	1.00000
502	GO:0019856	pyrimidine nucleobase biosynthetic proce...	8	1	0.39	1.00000
503	GO:2000112	regulation of cellular macromolecule bio...	773	67	37.49	1.00000
504	GO:0009132	nucleoside diphosphate metabolic process	86	1	4.17	1.00000
505	GO:2000113	negative regulation of cellular macromol...	32	3	1.55	1.00000
506	GO:0009133	nucleoside diphosphate biosynthetic proc...	4	1	0.19	1.00000
507	GO:0051188	cofactor biosynthetic process	148	5	7.18	1.00000
508	GO:0070271	protein complex biogenesis	135	9	6.55	1.00000
509	GO:0009135	purine nucleoside diphosphate metabolic ...	69	1	3.35	1.00000
510	GO:0006082	organic acid metabolic process	615	13	29.83	1.00000
511	GO:0032956	regulation of actin cytoskeleton organiz...	18	3	0.87	1.00000
512	GO:0071616	acyl-CoA biosynthetic process	2	1	0.1	1.00000
513	GO:0009136	purine nucleoside diphosphate biosynthet...	1	1	0.05	1.00000
514	GO:0044770	cell cycle phase transition	9	1	0.44	1.00000
515	GO:0006084	acetyl-CoA metabolic process	10	1	0.48	1.00000
516	GO:0006085	acetyl-CoA biosynthetic process	2	1	0.1	1.00000
517	GO:0044772	mitotic cell cycle phase transition	8	1	0.39	1.00000
518	GO:0051170	nuclear import	10	4	0.48	1.00000
519	GO:0051171	regulation of nitrogen compound metaboli...	795	71	38.56	1.00000
520	GO:0051172	negative regulation of nitrogen compound...	32	3	1.55	1.00000
521	GO:0010033	response to organic substance	64	5	3.1	1.00000
522	GO:0051173	positive regulation of nitrogen compound...	32	3	1.55	1.00000
523	GO:0043543	protein acylation	24	2	1.16	1.00000
524	GO:1903047	mitotic cell cycle process	23	4	1.12	1.00000
525	GO:1902903	regulation of supramolecular fiber organ...	18	3	0.87	1.00000
526	GO:0051174	regulation of phosphorus metabolic proce...	23	4	1.12	1.00000
527	GO:1902904	negative regulation of supramolecular fi...	2	2	0.1	1.00000
528	GO:1902905	positive regulation of supramolecular fi...	16	1	0.78	1.00000
529	GO:0042325	regulation of phosphorylation	11	4	0.53	1.00000
530	GO:0006839	mitochondrial transport	20	1	0.97	1.00000
531	GO:0032196	transposition	199	7	9.65	1.00000
532	GO:0042327	positive regulation of phosphorylation	3	1	0.15	1.00000
533	GO:0016050	vesicle organization	6	1	0.29	1.00000
534	GO:0000280	nuclear division	26	4	1.26	1.00000
535	GO:0032984	macromolecular complex disassembly	41	4	1.99	1.00000
536	GO:0045010	actin nucleation	16	1	0.78	1.00000
537	GO:0051179	localization	2649	126	128.48	1.00000
538	GO:0043549	regulation of kinase activity	8	4	0.39	1.00000
539	GO:0016051	carbohydrate biosynthetic process	91	3	4.41	1.00000
540	GO:0042592	homeostatic process	160	9	7.76	1.00000
541	GO:0048646	anatomical structure formation involved ...	8	1	0.39	1.00000
542	GO:0071702	organic substance transport	680	48	32.98	1.00000
543	GO:0016053	organic acid biosynthetic process	130	1	6.3	1.00000
544	GO:0071704	organic substance metabolic process	7832	411	379.85	1.00000
545	GO:0009060	aerobic respiration	27	2	1.31	1.00000
546	GO:0032988	ribonucleoprotein complex disassembly	12	1	0.58	1.00000
547	GO:0046578	regulation of Ras protein signal transdu...	123	16	5.97	1.00000
548	GO:1902099	regulation of metaphase/anaphase transit...	6	1	0.29	1.00000
549	GO:0071705	nitrogen compound transport	530	45	25.7	1.00000
550	GO:0009064	glutamine family amino acid metabolic pr...	56	1	2.72	1.00000
551	GO:0000288	nuclear-transcribed mRNA catabolic proce...	7	3	0.34	1.00000
552	GO:0042254	ribosome biogenesis	90	5	4.36	1.00000
553	GO:1901615	organic hydroxy compound metabolic proce...	60	1	2.91	1.00000
554	GO:0030832	regulation of actin filament length	18	3	0.87	1.00000
555	GO:0000003	reproduction	18	1	0.87	1.00000
556	GO:0030833	regulation of actin filament polymerizat...	18	3	0.87	1.00000
557	GO:0044728	DNA methylation or demethylation	4	1	0.19	1.00000
558	GO:0032970	regulation of actin filament-based proce...	18	3	0.87	1.00000
559	GO:0030834	regulation of actin filament depolymeriz...	2	2	0.1	1.00000
560	GO:0030835	negative regulation of actin filament de...	2	2	0.1	1.00000
561	GO:0030837	negative regulation of actin filament po...	2	2	0.1	1.00000
562	GO:0051128	regulation of cellular component organiz...	50	5	2.42	1.00000
563	GO:0030838	positive regulation of actin filament po...	16	1	0.78	1.00000
564	GO:0051129	negative regulation of cellular componen...	13	2	0.63	1.00000
565	GO:0055086	nucleobase-containing small molecule met...	474	12	22.99	1.00000
566	GO:0006022	aminoglycan metabolic process	109	1	5.29	1.00000
567	GO:1901983	regulation of protein acetylation	5	1	0.24	1.00000
568	GO:0097194	execution phase of apoptosis	4	2	0.19	1.00000
569	GO:0010256	endomembrane system organization	13	1	0.63	1.00000
570	GO:0090407	organophosphate biosynthetic process	349	7	16.93	1.00000
571	GO:0010257	NADH dehydrogenase complex assembly	1	1	0.05	1.00000
572	GO:0045047	protein targeting to ER	25	4	1.21	1.00000
573	GO:1901987	regulation of cell cycle phase transitio...	9	1	0.44	1.00000
574	GO:0000278	mitotic cell cycle	43	4	2.09	1.00000
575	GO:0009056	catabolic process	536	52	26	1.00000
576	GO:0009057	macromolecule catabolic process	275	45	13.34	1.00000
577	GO:0009100	glycoprotein metabolic process	73	4	3.54	1.00000
578	GO:0009059	macromolecule biosynthetic process	2072	116	100.49	1.00000
579	GO:0009101	glycoprotein biosynthetic process	70	4	3.39	1.00000
580	GO:0006354	DNA-templated transcription, elongation	17	2	0.82	1.00000
581	GO:0016071	mRNA metabolic process	193	19	9.36	1.00000
582	GO:0070585	protein localization to mitochondrion	14	1	0.68	1.00000
583	GO:0016073	snRNA metabolic process	8	1	0.39	1.00000
584	GO:0009108	coenzyme biosynthetic process	90	4	4.36	1.00000
585	GO:0015931	nucleobase-containing compound transport	23	2	1.12	1.00000
586	GO:0044743	protein transmembrane import into intrac...	4	1	0.19	1.00000
587	GO:0071166	ribonucleoprotein complex localization	5	1	0.24	1.00000
588	GO:0046496	nicotinamide nucleotide metabolic proces...	101	1	4.9	1.00000
589	GO:0042278	purine nucleoside metabolic process	41	3	1.99	1.00000
590	GO:0030029	actin filament-based process	42	8	2.04	1.00000
591	GO:0006040	amino sugar metabolic process	74	1	3.59	1.00000
592	GO:0050790	regulation of catalytic activity	63	10	3.06	1.00000
593	GO:0042221	response to chemical	87	5	4.22	1.00000
594	GO:0098813	nuclear chromosome segregation	18	4	0.87	1.00000
595	GO:0050794	regulation of cellular process	2335	176	113.25	1.00000
596	GO:0051130	positive regulation of cellular componen...	23	1	1.12	1.00000
597	GO:0034220	ion transmembrane transport	234	10	11.35	1.00000
598	GO:0033108	mitochondrial respiratory chain complex ...	7	1	0.34	1.00000
599	GO:0032940	secretion by cell	59	1	2.86	1.00000
600	GO:0010562	positive regulation of phosphorus metabo...	5	1	0.24	1.00000
601	GO:1900247	regulation of cytoplasmic translational ...	5	1	0.24	1.00000
602	GO:0010564	regulation of cell cycle process	19	2	0.92	1.00000
603	GO:0030041	actin filament polymerization	18	3	0.87	1.00000
604	GO:0000301	retrograde transport, vesicle recycling ...	12	2	0.58	1.00000
605	GO:0030042	actin filament depolymerization	4	2	0.19	1.00000
606	GO:0006261	DNA-dependent DNA replication	68	1	3.3	1.00000
607	GO:0018410	C-terminal protein amino acid modificati...	1	1	0.05	1.00000
608	GO:0006323	DNA packaging	20	1	0.97	1.00000
609	GO:0006325	chromatin organization	70	6	3.39	1.00000
610	GO:0010556	regulation of macromolecule biosynthetic...	773	67	37.49	1.00000
611	GO:0016043	cellular component organization	607	46	29.44	1.00000
612	GO:0010557	positive regulation of macromolecule bio...	26	2	1.26	1.00000
613	GO:0030030	cell projection organization	18	2	0.87	1.00000
614	GO:0010558	negative regulation of macromolecule bio...	32	3	1.55	1.00000
615	GO:1901605	alpha-amino acid metabolic process	145	1	7.03	1.00000
616	GO:0033365	protein localization to organelle	67	11	3.25	1.00000
617	GO:0046467	membrane lipid biosynthetic process	34	1	1.65	1.00000
618	GO:0030262	apoptotic nuclear changes	4	2	0.19	1.00000
619	GO:0045333	cellular respiration	39	4	1.89	1.00000
620	GO:0034248	regulation of cellular amide metabolic p...	20	1	0.97	1.00000
621	GO:0072350	tricarboxylic acid metabolic process	20	2	0.97	1.00000
622	GO:0031401	positive regulation of protein modificat...	5	1	0.24	1.00000
623	GO:0006259	DNA metabolic process	1094	31	53.06	1.00000
624	GO:0051052	regulation of DNA metabolic process	6	1	0.29	1.00000
625	GO:0019362	pyridine nucleotide metabolic process	101	1	4.9	1.00000
626	GO:0019363	pyridine nucleotide biosynthetic process	16	1	0.78	1.00000
627	GO:0048869	cellular developmental process	6	2	0.29	1.00000
628	GO:0001932	regulation of protein phosphorylation	11	4	0.53	1.00000
629	GO:0033013	tetrapyrrole metabolic process	74	1	3.59	1.00000
630	GO:0033014	tetrapyrrole biosynthetic process	71	1	3.44	1.00000
631	GO:1905818	regulation of chromosome separation	6	1	0.29	1.00000
632	GO:0001934	positive regulation of protein phosphory...	3	1	0.15	1.00000
633	GO:0043412	macromolecule modification	1603	143	77.74	1.00000
634	GO:0043413	macromolecule glycosylation	70	4	3.39	1.00000
635	GO:0043414	macromolecule methylation	71	10	3.44	1.00000
636	GO:0030258	lipid modification	63	3	3.06	1.00000
637	GO:0048856	anatomical structure development	58	5	2.81	1.00000
638	GO:0046483	heterocycle metabolic process	3536	181	171.49	1.00000
639	GO:0071900	regulation of protein serine/threonine k...	8	4	0.39	1.00000
640	GO:0019359	nicotinamide nucleotide biosynthetic pro...	16	1	0.78	1.00000
641	GO:0046486	glycerolipid metabolic process	109	4	5.29	1.00000
642	GO:0071902	positive regulation of protein serine/th...	1	1	0.05	1.00000
643	GO:0033043	regulation of organelle organization	41	5	1.99	1.00000
644	GO:0033044	regulation of chromosome organization	11	2	0.53	1.00000
645	GO:0009260	ribonucleotide biosynthetic process	144	2	6.98	1.00000
646	GO:0033045	regulation of sister chromatid segregati...	6	1	0.29	1.00000
647	GO:0009262	deoxyribonucleotide metabolic process	24	1	1.16	1.00000
648	GO:0033047	regulation of mitotic sister chromatid s...	6	1	0.29	1.00000
649	GO:0090150	establishment of protein localization to...	33	5	1.6	1.00000
650	GO:0050789	regulation of biological process	2389	181	115.87	1.00000
651	GO:0033036	macromolecule localization	527	47	25.56	1.00000
652	GO:0009311	oligosaccharide metabolic process	23	3	1.12	1.00000
653	GO:0009312	oligosaccharide biosynthetic process	14	3	0.68	1.00000
654	GO:0032870	cellular response to hormone stimulus	35	4	1.7	1.00000
655	GO:0009259	ribonucleotide metabolic process	242	5	11.74	1.00000
656	GO:0043436	oxoacid metabolic process	613	13	29.73	1.00000
657	GO:1901880	negative regulation of protein depolymer...	2	2	0.1	1.00000
658	GO:0051028	mRNA transport	9	1	0.44	1.00000
659	GO:0072594	establishment of protein localization to...	66	11	3.2	1.00000
660	GO:0072599	establishment of protein localization to...	25	4	1.21	1.00000
661	GO:0071822	protein complex subunit organization	162	10	7.86	1.00000
662	GO:0008610	lipid biosynthetic process	149	2	7.23	1.00000
663	GO:0071824	protein-DNA complex subunit organization	29	1	1.41	1.00000
664	GO:0090174	organelle membrane fusion	6	1	0.29	1.00000
665	GO:0015849	organic acid transport	120	2	5.82	1.00000
666	GO:0071826	ribonucleoprotein complex subunit organi...	46	2	2.23	1.00000
667	GO:0080090	regulation of primary metabolic process	795	71	38.56	1.00000
668	GO:0022411	cellular component disassembly	45	6	2.18	1.00000
669	GO:0016569	covalent chromatin modification	45	4	2.18	1.00000
670	GO:0006302	double-strand break repair	23	1	1.12	1.00000
671	GO:0015833	peptide transport	410	41	19.88	1.00000
672	GO:0022414	reproductive process	18	1	0.87	1.00000
673	GO:0006304	DNA modification	4	1	0.19	1.00000
674	GO:1901135	carbohydrate derivative metabolic proces...	622	17	30.17	1.00000
675	GO:1901879	regulation of protein depolymerization	2	2	0.1	1.00000
676	GO:0006305	DNA alkylation	4	1	0.19	1.00000
677	GO:0006306	DNA methylation	4	1	0.19	1.00000
678	GO:1901137	carbohydrate derivative biosynthetic pro...	294	10	14.26	1.00000
679	GO:0006308	DNA catabolic process	5	2	0.24	1.00000
680	GO:0046785	microtubule polymerization	34	2	1.65	1.00000
681	GO:0050657	nucleic acid transport	17	2	0.82	1.00000
682	GO:0050658	RNA transport	17	2	0.82	1.00000
683	GO:0019318	hexose metabolic process	83	2	4.03	1.00000
684	GO:0006575	cellular modified amino acid metabolic p...	56	1	2.72	1.00000
685	GO:0016556	mRNA modification	8	1	0.39	1.00000
686	GO:0031929	TOR signaling	15	2	0.73	1.00000
687	GO:0071396	cellular response to lipid	32	4	1.55	1.00000
688	GO:0043687	post-translational protein modification	1	1	0.05	1.00000
689	GO:0071840	cellular component organization or bioge...	698	51	33.85	1.00000
690	GO:0072330	monocarboxylic acid biosynthetic process	30	1	1.45	1.00000
691	GO:0009225	nucleotide-sugar metabolic process	24	1	1.16	1.00000
692	GO:0009226	nucleotide-sugar biosynthetic process	20	1	0.97	1.00000
693	GO:0036260	RNA capping	16	1	0.78	1.00000
694	GO:0071103	DNA conformation change	58	2	2.81	1.00000
695	GO:0046434	organophosphate catabolic process	66	1	3.2	1.00000
696	GO:0042451	purine nucleoside biosynthetic process	31	3	1.5	1.00000
697	GO:0051261	protein depolymerization	4	2	0.19	1.00000
698	GO:0010467	gene expression	2239	155	108.59	1.00000
699	GO:1901068	guanosine-containing compound metabolic ...	33	1	1.6	1.00000
700	GO:0010468	regulation of gene expression	813	71	39.43	1.00000
701	GO:0042455	ribonucleoside biosynthetic process	35	3	1.7	1.00000
702	GO:0018193	peptidyl-amino acid modification	95	8	4.61	1.00000
703	GO:0016571	histone methylation	11	2	0.53	1.00000
704	GO:0016573	histone acetylation	18	1	0.87	1.00000
705	GO:0034504	protein localization to nucleus	10	4	0.48	1.00000
706	GO:1905039	carboxylic acid transmembrane transport	80	2	3.88	1.00000
707	GO:1902275	regulation of chromatin organization	5	1	0.24	1.00000
708	GO:0051252	regulation of RNA metabolic process	749	65	36.33	1.00000
709	GO:0051253	negative regulation of RNA metabolic pro...	23	3	1.12	1.00000
710	GO:0043623	cellular protein complex assembly	98	7	4.75	1.00000
711	GO:0019220	regulation of phosphate metabolic proces...	23	4	1.12	1.00000
712	GO:0006518	peptide metabolic process	789	30	38.27	1.00000
713	GO:0051254	positive regulation of RNA metabolic pro...	19	2	0.92	1.00000
714	GO:0043624	cellular protein complex disassembly	28	3	1.36	1.00000
715	GO:0019222	regulation of metabolic process	853	78	41.37	1.00000
716	GO:0033554	cellular response to stress	275	12	13.34	1.00000

[truncated: 9 more sheets: Module 11, Module 12, Module 13, Module 14, Module 15, Module 16, Module 17, Module 18, Module 19]
