# Supplementary material for: Immune challenge reduces gut microbial diversity and triggers fertility-dependent gene expression changes in a social insect
Source: BMC Genomics. 2020 Nov 23;21:816. doi: 10.1186/s12864-020-07191-9 (PMC7682046; doi:10.1186/s12864-020-07191-9)
Supplement: Supplementary file 1 — Additional file 1. Additional methodological details, Figures S1 and S2 and Table S2. Description of additional supplementary tables (Tables S1, S3-S18) are also provided. [file 12864_2020_7191_MOESM1_ESM.zip › Table_S8.xlsx]

## Sheet: sheet1
Contig	Annotation	baseMean	log2FoldChange	lfcSE	stat	pvalue	padj
Contig100018	#N/A	0.2118409054003	-30	5.93366541354304	-5.0558968039431	4.28372938557289e-07	6.27549146314202e-05
Contig100073	ref|XP_003493906.1| PREDICTED: transmembrane and TPR repeat-containing protein CG4050-like isoform X1 [Bombus impatiens]	0.29429601282883	-30	5.9301662546066	-5.05888009070501	4.21725942720471e-07	6.27549146314202e-05
Contig100394	ref|XP_014093560.1| PREDICTED: elongation factor 1-alpha 1 [Bactrocera oleae]	0.445572383060569	-30	5.92981133158799	-5.05918288499173	4.21056883113358e-07	6.27549146314202e-05
Contig100756	#N/A	0.879696967340463	-30	5.91550408692649	-5.07141903025665	3.94860262308415e-07	6.27549146314202e-05
Contig100786	ref|XP_012531925.1| PREDICTED: DNA excision repair protein haywire isoform X1 [Monomorium pharaonis]	2.28036861794325	-30	5.92078335753391	-5.06689709594364	4.04352727628434e-07	6.27549146314202e-05
Contig100788	ref|XP_012531926.1| PREDICTED: DNA excision repair protein haywire isoform X2 [Monomorium pharaonis]	0.305769809000537	-30	5.93016759902822	-5.058878943812	4.21728478864366e-07	6.27549146314202e-05
Contig100837	ref|XP_011876325.1| PREDICTED: probable cytochrome P450 12a5, mitochondrial [Vollenhovia emeryi]	0.294727156380868	-30	5.93206129776184	-5.05726399208298	4.25314285517189e-07	6.27549146314202e-05
Contig100846	ref|XP_011876325.1| PREDICTED: probable cytochrome P450 12a5, mitochondrial [Vollenhovia emeryi]	0.2118409054003	-30	5.93366541354304	-5.0558968039431	4.28372938557289e-07	6.27549146314202e-05
Contig101323	#N/A	1.0960160439094	-30	5.9104268931612	-5.07577549681094	3.85918743360015e-07	6.27549146314202e-05
Contig101466	ref|XP_012538224.1| PREDICTED: UPF0160 protein MYG1, mitochondrial isoform X1 [Monomorium pharaonis]	1.733889400992	-30	5.92779855927526	-5.06090072056494	4.17280465577761e-07	6.27549146314202e-05
Contig101900	#N/A	0.433644854671712	-30	5.92532668159436	-5.06301198433295	4.12683899904632e-07	6.27549146314202e-05
Contig102359	ref|XP_011872354.1| PREDICTED: zinc carboxypeptidase-like [Vollenhovia emeryi]	0.419648503358345	-30	5.93079101987615	-5.05834717484726	4.22905975032029e-07	6.27549146314202e-05
Contig102565	ref|XP_012055686.1| PREDICTED: LOW QUALITY PROTEIN: elongation factor 1-gamma [Atta cephalotes]	0.28120623041882	-30	5.93070207615063	-5.05842303572122	4.2273780251637e-07	6.27549146314202e-05
Contig103315	#N/A	1.32463949274051	-30	5.92987702601461	-5.05912683659185	4.21180651362307e-07	6.27549146314202e-05
Contig103354	#N/A	0.702624313844234	-30	5.92789003810462	-5.06082262106066	4.17451444877602e-07	6.27549146314202e-05
Contig103694	ref|XP_009176670.1| hypothetical protein T265_11688 [Opisthorchis viverrini]	0.516186568915824	-30	5.92626126408013	-5.0622135378732	4.14416474504974e-07	6.27549146314202e-05
Contig10423	ref|XP_011859890.1| PREDICTED: putative gustatory receptor 28b [Vollenhovia emeryi]	4.19551411877676	-30	5.91017525593279	-5.07599160784364	3.85480307008401e-07	6.27549146314202e-05
Contig104532	#N/A	0.168568688313648	-30	5.93423468216933	-5.05541179389844	4.29463086673377e-07	6.27549146314202e-05
Contig104671	#N/A	0.427767289008339	-30	5.9311128618159	-5.05807269208077	4.23515002819394e-07	6.27549146314202e-05
Contig106026	#N/A	0.318662303097242	-30	5.93218553191744	-5.05715808087735	4.2555047362236e-07	6.27549146314202e-05
Contig107095	#N/A	0.42882500877332	-30	5.91429166120496	-5.07245866766873	3.92708449862499e-07	6.27549146314202e-05
Contig107099	#N/A	0.329829489280014	-30	5.92814341774215	-5.0606063122923	4.17925351672327e-07	6.27549146314202e-05
Contig107369	#N/A	0.899564557815721	-30	5.93407908879153	-5.05554434834967	4.29164880986391e-07	6.27549146314202e-05
Contig10840	ref|XP_005094961.1| PREDICTED: probable imidazolonepropionase [Aplysia californica]	1.05695995507938	-30	5.92510062512135	-5.06320515010419	4.12265794401491e-07	6.27549146314202e-05
Contig108464	ref|XP_012146863.1| PREDICTED: phospholipid scramblase 2-like isoform X1 [Megachile rotundata]	0.371663004773983	-30	5.92515639713107	-5.06315749142518	4.12368913170242e-07	6.27549146314202e-05
Contig108654	ref|XP_011067718.1| PREDICTED: neutral ceramidase isoform X1 [Acromyrmex echinatior]	1.57687207202176	-30	5.91124276477397	-5.0750749366571	3.87343319184155e-07	6.27549146314202e-05
Contig109308	#N/A	0.370275019240587	-30	5.93009472369114	-5.05894111271914	4.21591024926744e-07	6.27549146314202e-05
Contig110337	ref|XP_011165057.1| PREDICTED: uncharacterized protein LOC105199598 [Solenopsis invicta]	0.397109791958268	-30	5.92380343409963	-5.06431388781552	4.09873836094439e-07	6.27549146314202e-05
Contig111213	ref|XP_011864963.1| PREDICTED: probable ATP-dependent RNA helicase Dbp73D [Vollenhovia emeryi]	0.449935985602414	-30	5.92485514313113	-5.06341493171862	4.11812187020822e-07	6.27549146314202e-05
Contig111725	#N/A	0.263841306228765	-30	5.93110750357984	-5.05807726160635	4.23504856942977e-07	6.27549146314202e-05
Contig112740	ref|XP_013402251.1| PREDICTED: prostaglandin reductase 1-like [Lingula anatina]	0.441574655165868	-30	5.93146643549561	-5.05777118124977	4.24184976265517e-07	6.27549146314202e-05
Contig113011	#N/A	0.441363362050915	-30	5.93679981270956	-5.05322748726944	4.34405970919975e-07	6.27549146314202e-05
Contig113118	ref|XP_011056923.1| PREDICTED: inhibitor of nuclear factor kappa-B kinase subunit beta-like isoform X1 [Acromyrmex echinatior]	4.06694597501123	-30	5.92117913665295	-5.06655841811907	4.05072477338595e-07	6.27549146314202e-05
Contig113229	ref|XP_011872254.1| PREDICTED: luciferin 4-monooxygenase-like [Vollenhovia emeryi]	18.232646735432	-30	5.91934730848797	-5.06812633835185	4.01750725212005e-07	6.27549146314202e-05
Contig113569	#N/A	0.389441263115323	-30	5.93257520070024	-5.05682591203547	4.26292050393939e-07	6.27549146314202e-05
Contig113774	#N/A	0.306241085219553	-30	5.92832075793652	-5.06045492896746	4.18257323245691e-07	6.27549146314202e-05
Contig113870	ref|XP_011870466.1| PREDICTED: uncharacterized protein LOC105563463 isoform X1 [Vollenhovia emeryi]	5.2117730943162	-30	5.91613313340808	-5.07087979994765	3.95980822576644e-07	6.27549146314202e-05
Contig114189	#N/A	0.235709813245951	-30	5.9330158668843	-5.05645032359476	4.27132064591686e-07	6.27549146314202e-05
Contig114606	ref|XP_011696169.1| PREDICTED: leukotriene A-4 hydrolase [Wasmannia auropunctata]	0.583353343577702	-30	5.92297031820996	-5.06502622641314	4.08344128793333e-07	6.27549146314202e-05
Contig116643	ref|XP_012539991.1| PREDICTED: serine/threonine-protein kinase SIK3-like isoform X2 [Monomorium pharaonis]	4.49668347787456	-30	5.89073177947807	-5.09274587997929	3.52914581921929e-07	6.27549146314202e-05
Contig116659	#N/A	0.355920640766289	-30	5.92711312129111	-5.06148598585631	4.16001322437217e-07	6.27549146314202e-05
Contig118001	#N/A	0.417784003214008	-30	5.92861695857721	-5.06020210271766	4.18812318420602e-07	6.27549146314202e-05
Contig118256	ref|XP_011172252.1| PREDICTED: angio-associated migratory cell protein [Solenopsis invicta]	0.595547236222401	-30	5.92793632574318	-5.06078310418406	4.17537982930598e-07	6.27549146314202e-05
Contig119884	ref|XP_011170369.1| PREDICTED: uncharacterized protein LOC105203292 [Solenopsis invicta]	0.696108606818767	-30	5.92006194190605	-5.06751454535306	4.03043713813071e-07	6.27549146314202e-05
Contig120158	ref|XP_011859602.1| PREDICTED: uncharacterized protein LOC105557068, partial [Vollenhovia emeryi]	0.430973941817951	-30	5.92970237378484	-5.05927584706945	4.20851678012982e-07	6.27549146314202e-05
Contig120499	ref|XP_011871062.1| PREDICTED: RB1-inducible coiled-coil protein 1 isoform X3 [Vollenhovia emeryi]	0.364071851971415	-30	5.92533622951618	-5.06300382593641	4.12701567679103e-07	6.27549146314202e-05
Contig120694	#N/A	0.372386925351118	-30	5.93268419690792	-5.05673300723403	4.26499686133183e-07	6.27549146314202e-05
Contig121437	ref|XP_012056069.1| PREDICTED: myosin-IB [Atta cephalotes]	1.00674150589577	-30	5.9098870344458	-5.07623916077327	3.84978673401038e-07	6.27549146314202e-05
Contig122453	#N/A	0.327513353998259	-30	5.92404525306534	-5.06410716300264	4.10318800205132e-07	6.27549146314202e-05
Contig122756	ref|XP_012527246.1| PREDICTED: integrator complex subunit 9 [Monomorium pharaonis]	0.302256378173969	-30	5.93183815193006	-5.05745423789738	4.2489034395134e-07	6.27549146314202e-05
Contig123021	ref|XP_011865174.1| PREDICTED: vanin-like protein 1 isoform X2 [Vollenhovia emeryi]	4.29456289812492	-30	5.9261707033662	-5.06229089603499	4.14248305989228e-07	6.27549146314202e-05
Contig123777	ref|XP_011645585.1| PREDICTED: vesicular integral-membrane protein VIP36 [Pogonomyrmex barbatus]	2.20573927466345	-30	5.92735356700774	-5.06128066444072	4.16449637073362e-07	6.27549146314202e-05
Contig124023	#N/A	0.226806112359866	-30	5.93212646319363	-5.05720843716625	4.25438160414722e-07	6.27549146314202e-05
Contig124393	#N/A	0.214413419004694	-30	5.93194878710573	-5.05735991268349	4.25100486180923e-07	6.27549146314202e-05
Contig124653	ref|XP_012054177.1| PREDICTED: uncharacterized protein LOC105617220 [Atta cephalotes]	0.382233377712777	-30	5.92899207045161	-5.05988195692002	4.19516110624925e-07	6.27549146314202e-05
Contig125902	ref|XP_011699345.1| PREDICTED: uncharacterized protein LOC105456759 [Wasmannia auropunctata]	22.8370531193278	-30	5.91650435964539	-5.07056163173318	3.96643438313516e-07	6.27549146314202e-05
Contig126118	#N/A	0.252351494073517	-30	5.93330749491093	-5.05620179397939	4.27688785847983e-07	6.27549146314202e-05
Contig126210	#N/A	0.308511879654577	-30	5.93195435830856	-5.05735516288669	4.25111070657057e-07	6.27549146314202e-05
Contig127176	#N/A	0.286269235976717	-30	5.93109159525847	-5.05809082833641	4.23474735642497e-07	6.27549146314202e-05
Contig127368	#N/A	0.330080716123526	-30	5.93006721424299	-5.05896458103295	4.21539148295953e-07	6.27549146314202e-05
Contig127669	ref|XP_011859007.1| PREDICTED: uncharacterized protein LOC105556520 [Vollenhovia emeryi]	0.447968742393124	-30	5.91995531215931	-5.06760582100703	4.02850553554225e-07	6.27549146314202e-05
Contig127673	ref|XP_011859007.1| PREDICTED: uncharacterized protein LOC105556520 [Vollenhovia emeryi]	2.37455547797816	-30	5.91127284885233	-5.07504910821778	3.87395937702859e-07	6.27549146314202e-05
Contig128038	#N/A	0.283735284402285	-30	5.92826653726516	-5.06050121252471	4.18155800099041e-07	6.27549146314202e-05
Contig128127	ref|XP_011874297.1| PREDICTED: testis-expressed sequence 9 protein [Vollenhovia emeryi]	1.78011694648984	-30	5.91345395882698	-5.07317723429962	3.91227798776706e-07	6.27549146314202e-05
Contig128316	#N/A	0.30396887262643	-30	5.93004376724943	-5.05898458383808	4.21494937022444e-07	6.27549146314202e-05
Contig128401	#N/A	0.343533071512659	-30	5.92649554031793	-5.06201342697554	4.14851800207835e-07	6.27549146314202e-05
Contig128534	#N/A	0.384792244785896	-30	5.92963965249962	-5.05932936200493	4.2073359255661e-07	6.27549146314202e-05
Contig129351	#N/A	0.224701472250158	-30	5.93362324697504	-5.05593273305547	4.28292287651973e-07	6.27549146314202e-05
Contig129666	#N/A	0.232279074231955	-30	5.93161389185342	-5.05764544809677	4.24464664169037e-07	6.27549146314202e-05
Contig131470	#N/A	0.439894189265247	-30	5.92961578697547	-5.05934972479931	4.20688668639448e-07	6.27549146314202e-05
Contig132290	ref|XP_011069215.1| PREDICTED: protein SMG9 isoform X2 [Acromyrmex echinatior]	0.390469588645817	-30	5.9292638510191	-5.05965002634243	4.20026687598913e-07	6.27549146314202e-05
Contig132477	#N/A	0.226915933340186	-30	5.93054405423095	-5.05855781959794	4.22439165422613e-07	6.27549146314202e-05
Contig132803	#N/A	0.430630405265364	-30	5.92822964624346	-5.0605327037238	4.18086737634572e-07	6.27549146314202e-05
Contig133072	#N/A	0.24092394922226	-30	5.93013537790677	-5.05890643100115	4.21667700028019e-07	6.27549146314202e-05
Contig133252	#N/A	0.305474025607016	-30	5.93028643675409	-5.05877756832608	4.21952710332756e-07	6.27549146314202e-05
Contig133959	ref|XP_013382162.1| PREDICTED: estradiol 17-beta-dehydrogenase 8-like [Lingula anatina]	0.936457285266563	-30	5.9273004380234	-5.06132603091134	4.16350540316152e-07	6.27549146314202e-05
Contig134139	ref|XP_011863531.1| PREDICTED: putative homeodomain transcription factor isoform X1 [Vollenhovia emeryi]	9.30241180429893	-30	5.88865670440142	-5.09454048791413	3.49588121882043e-07	6.27549146314202e-05
Contig134808	ref|XP_011706295.1| PREDICTED: aminopeptidase N-like [Wasmannia auropunctata]	1.07994746584796	-30	5.92715119090288	-5.061453476342	4.16072275181465e-07	6.27549146314202e-05
Contig134895	ref|XP_011873888.1| PREDICTED: thyrotropin-releasing hormone receptor-like isoform X2 [Vollenhovia emeryi]	0.22595873523759	-30	5.9312072396705	-5.05799220761448	4.23693743721061e-07	6.27549146314202e-05
Contig135266	#N/A	0.585100259817234	-30	5.9276723008898	-5.06100851686702	4.17044583562367e-07	6.27549146314202e-05
Contig135370	#N/A	0.294072307350807	-30	5.93135328467914	-5.05786766697759	4.23970468562216e-07	6.27549146314202e-05
Contig135660	ref|XP_011861392.1| PREDICTED: uncharacterized protein LOC105558377, partial [Vollenhovia emeryi]	0.721549214384873	-30	5.93355693141144	-5.05598923997579	4.28165474903852e-07	6.27549146314202e-05
Contig136996	ref|XP_012055693.1| PREDICTED: potassium voltage-gated channel protein eag isoform X2 [Atta cephalotes]	0.570705403982342	-30	5.92825745564533	-5.06050896481086	4.18138797756767e-07	6.27549146314202e-05
Contig137282	ref|XP_012542600.1| PREDICTED: transcription elongation factor B polypeptide 1 isoform X2 [Monomorium pharaonis]	0.2118409054003	-30	5.93366541354304	-5.0558968039431	4.28372938557289e-07	6.27549146314202e-05
Contig137310	ref|XP_012533990.1| PREDICTED: epididymal secretory protein E1 [Monomorium pharaonis]	32.751849037382	-30	5.93228501867884	-5.05707327034013	4.25739697249729e-07	6.27549146314202e-05
Contig138337	ref|XP_011874272.1| PREDICTED: probable GPI-anchored adhesin-like protein PGA55 [Vollenhovia emeryi]	0.327164596834012	-30	5.93338975090807	-5.05613169864809	4.27845930120767e-07	6.27549146314202e-05
Contig138555	ref|XP_011696806.1| PREDICTED: ankyrin repeat and zinc finger domain-containing protein 1-like isoform X1 [Wasmannia auropunctata]	0.740608191312116	-30	5.92713587476384	-5.06146655549639	4.16043728229935e-07	6.27549146314202e-05
Contig138561	ref|XP_012060719.1| PREDICTED: luciferin 4-monooxygenase-like [Atta cephalotes]	10.6833423739769	-30	5.93147461262071	-5.05776420861137	4.24200481937143e-07	6.27549146314202e-05
Contig138690	#N/A	0.27908815085856	-30	5.92937732828865	-5.05955319403811	4.20240033681688e-07	6.27549146314202e-05
Contig138877	ref|XP_011157336.1| PREDICTED: zinc finger CCCH domain-containing protein 13 [Solenopsis invicta]	0.672714747697237	-30	5.92883551958629	-5.06001556307188	4.19222259046777e-07	6.27549146314202e-05
Contig138928	ref|XP_011860695.1| PREDICTED: modifier of mdg4-like isoform X2 [Vollenhovia emeryi]	8.06638623752164	-30	5.91074854507751	-5.07549928257125	3.86479815014416e-07	6.27549146314202e-05
Contig139256	ref|XP_012537856.1| PREDICTED: lipase 3-like [Monomorium pharaonis]	0.322176600214712	-30	5.93253010674735	-5.05686434964393	4.26206173548888e-07	6.27549146314202e-05
Contig139627	ref|XP_012521562.1| PREDICTED: peroxiredoxin-2B-like [Monomorium pharaonis]	0.862015296344732	-30	5.92781288446422	-5.06088849036124	4.17307236082373e-07	6.27549146314202e-05
Contig140058	ref|XP_011873691.1| PREDICTED: GDP-fucose transporter 1 [Vollenhovia emeryi]	1.24496387075865	-30	5.90206665086621	-5.08296530260245	3.71587601056765e-07	6.27549146314202e-05
Contig140219	#N/A	1.00013395106347	-30	5.93154565386541	-5.05770363251776	4.24335213358287e-07	6.27549146314202e-05
Contig140326	#N/A	0.226026298575977	-30	5.9318404762458	-5.05745225619869	4.24894757843752e-07	6.27549146314202e-05
Contig141136	ref|XP_011696169.1| PREDICTED: leukotriene A-4 hydrolase [Wasmannia auropunctata]	0.577852051922371	-30	5.91499694904526	-5.07185384175765	3.93958921053952e-07	6.27549146314202e-05
Contig141472	#N/A	0.345660583114397	-30	5.9290966212841	-5.05979273340004	4.19712458295149e-07	6.27549146314202e-05
Contig143296	#N/A	0.634418283380145	-30	5.91889672582102	-5.06851215516666	4.0093738291644e-07	6.27549146314202e-05
Contig143964	ref|XP_014208752.1| PREDICTED: ubiquitin-conjugating enzyme E2 J1-like isoform X2 [Copidosoma floridanum]	0.507781629927169	-30	5.92916423061934	-5.05973503737243	4.19839472921295e-07	6.27549146314202e-05
Contig144149	#N/A	0.289909390401178	-30	5.93046948950502	-5.05862142164126	4.22298314741212e-07	6.27549146314202e-05
Contig144227	#N/A	0.335089704423678	-30	5.92992453613506	-5.0590863032387	4.21270180553782e-07	6.27549146314202e-05
Contig145333	ref|XP_013067388.1| PREDICTED: laccase-4-like [Biomphalaria glabrata]	0.641666746240631	-30	5.92921372165487	-5.05969280385913	4.19932471181702e-07	6.27549146314202e-05
Contig145402	#N/A	0.321923016282049	-30	5.92675966705088	-5.06178783775922	4.15343081062671e-07	6.27549146314202e-05
Contig146453	#N/A	0.522415617577927	-30	5.9161176208597	-5.07089309621274	3.95953155097199e-07	6.27549146314202e-05
Contig147177	ref|XP_011690764.1| PREDICTED: hydrocephalus-inducing protein homolog [Wasmannia auropunctata]	0.238556157909644	-30	5.93250217503107	-5.05688815863652	4.261529881538e-07	6.27549146314202e-05
Contig14729	#N/A	1.42740816962498	-30	5.91230287446748	-5.0741649467175	3.89201345024934e-07	6.27549146314202e-05
Contig148353	ref|XP_011703975.1| PREDICTED: uncharacterized protein KIAA0556-like isoform X1 [Wasmannia auropunctata]	1.11609340350203	-30	5.91568993762452	-5.07125970365625	3.9519103583453e-07	6.27549146314202e-05
Contig148692	#N/A	0.328047145034392	-30	5.93220410746975	-5.0571422453628	4.25585798606996e-07	6.27549146314202e-05
Contig148912	ref|XP_011056079.1| PREDICTED: aminopeptidase M1-like [Acromyrmex echinatior]	0.307950852753779	-30	5.93269493869385	-5.05672385147193	4.26520153902505e-07	6.27549146314202e-05
Contig16394	#N/A	0.605367855071892	-30	5.92831000128748	-5.06046411093292	4.18237180681184e-07	6.27549146314202e-05
Contig1673	ref|XP_011872275.1| PREDICTED: mutS protein homolog 5-like [Vollenhovia emeryi]	0.382805076387298	-30	5.92184808652497	-5.06598608435504	4.06291597386063e-07	6.27549146314202e-05
Contig17651	ref|XP_008188257.1| PREDICTED: uncharacterized protein LOC100160950 [Acyrthosiphon pisum]	0.333544501541302	-30	5.92202756725773	-5.06583254793795	4.06619244911701e-07	6.27549146314202e-05
Contig17927	#N/A	0.583407483663242	-30	5.92898060580905	-5.05989174101984	4.1949458486523e-07	6.27549146314202e-05
Contig19669	#N/A	0.240630576566317	-30	5.93155647438484	-5.05769440610633	4.24355738071824e-07	6.27549146314202e-05
Contig19895	#N/A	4.06560106467545	-30	5.9130432579223	-5.07352960082035	3.90503695688326e-07	6.27549146314202e-05
Contig20111	ref|XP_011066784.1| PREDICTED: gem-associated protein 2 [Acromyrmex echinatior]	1.63130407659962	-30	5.92679250502394	-5.06175979242904	4.15404196486149e-07	6.27549146314202e-05
Contig20132	#N/A	0.22463234636656	-30	5.93058306475597	-5.05852454512994	4.22512871859593e-07	6.27549146314202e-05
Contig20174	#N/A	1.03636949393217	-30	5.93155497737145	-5.05769568257368	4.24352898435471e-07	6.27549146314202e-05
Contig20614	#N/A	0.419422209076333	-30	5.92219991322457	-5.06568512370015	4.06934088930604e-07	6.27549146314202e-05
Contig22066	ref|XP_009055741.1| hypothetical protein LOTGIDRAFT_215945 [Lottia gigantea]	0.465721925988032	-30	5.9286646346571	-5.06016141048517	4.18901710915457e-07	6.27549146314202e-05
Contig22857	ref|XP_001608147.1| PREDICTED: phosphoglucomutase [Nasonia vitripennis]	1.03543661163098	-30	5.92505228312266	-5.06324646036528	4.12176431792459e-07	6.27549146314202e-05
Contig23208	ref|XP_003484469.1| PREDICTED: translationally-controlled tumor protein homolog [Bombus impatiens]	1.57521204204942	-30	5.92680358294042	-5.06175033138458	4.15424815627514e-07	6.27549146314202e-05
Contig24385	#N/A	0.889946290893514	-30	5.92238733270751	-5.06552481535939	4.07276715614236e-07	6.27549146314202e-05
Contig25278	ref|XP_013789506.1| PREDICTED: uncharacterized oxidoreductase YhdF-like, partial [Limulus polyphemus]	0.786378697985946	-30	5.9234385293734	-5.06462586743067	4.09203198036676e-07	6.27549146314202e-05
Contig27072	ref|XP_012535107.1| PREDICTED: cilia- and flagella-associated protein 70 [Monomorium pharaonis]	0.322800869170279	-30	5.92642880209039	-5.06207043091757	4.14727747642798e-07	6.27549146314202e-05
Contig28236	ref|XP_009021338.1| hypothetical protein HELRODRAFT_185764 [Helobdella robusta]	1.10463331509788	-30	5.91627125201352	-5.07076141747049	3.96227240534875e-07	6.27549146314202e-05
Contig28475	ref|XP_015785005.1| PREDICTED: elongation factor 1-alpha [Tetranychus urticae]	0.707427214128363	-30	5.92047939312538	-5.06715723642832	4.03800721618254e-07	6.27549146314202e-05
Contig29077	ref|XP_011862678.1| PREDICTED: pancreatic lipase-related protein 2-like [Vollenhovia emeryi]	33.5650763533924	-30	5.92846797939762	-5.06032926284747	4.18533092281308e-07	6.27549146314202e-05
Contig29711	ref|XP_012530428.1| PREDICTED: THAP domain-containing protein 2-like [Monomorium pharaonis]	1.2107186524177	-30	5.92093354330392	-5.06676857299428	4.04625716005302e-07	6.27549146314202e-05
Contig3097	#N/A	0.884818050355547	-30	5.92308129758484	-5.0649313242134	4.08547607446772e-07	6.27549146314202e-05
Contig31031	#N/A	0.540991872162937	-30	5.9256068231988	-5.06277262314296	4.13202562564477e-07	6.27549146314202e-05
Contig31396	#N/A	0.310553990853178	-30	5.93224754616653	-5.05710521459716	4.25668415821545e-07	6.27549146314202e-05
Contig32117	#N/A	0.442927796907277	-30	5.92546467764473	-5.0628940736382	4.1293931755411e-07	6.27549146314202e-05
Contig32366	ref|XP_014234959.1| PREDICTED: dnaJ homolog subfamily A member 4 [Trichogramma pretiosum]	1.36324892957962	-30	5.92349776646276	-5.06457521936648	4.09312000163952e-07	6.27549146314202e-05
Contig32381	#N/A	0.207440004719994	-30	5.93190859491046	-5.05739417929329	4.25024133792134e-07	6.27549146314202e-05
Contig32392	#N/A	0.276951342673239	-30	5.93120571090459	-5.05799351130996	4.23690847878153e-07	6.27549146314202e-05
Contig32544	#N/A	0.293064669687883	-30	5.93159670075414	-5.05766010628906	4.24432048501315e-07	6.27549146314202e-05
Contig32692	#N/A	0.446574581988674	-30	5.93299617450969	-5.05646710660136	4.27094494860687e-07	6.27549146314202e-05
Contig32756	#N/A	0.344231060810392	-30	5.93010114586193	-5.05893563399576	4.21603136513619e-07	6.27549146314202e-05
Contig32956	ref|XP_014484120.1| PREDICTED: uncharacterized protein LOC106749275 isoform X2 [Dinoponera quadriceps]	0.253599391295398	-30	5.93145865341902	-5.05777781704798	4.24170220163012e-07	6.27549146314202e-05
Contig32962	#N/A	0.420738618390797	-30	5.92004753174329	-5.06752688034007	4.030176049245e-07	6.27549146314202e-05
Contig33001	#N/A	0.258268364866057	-30	5.93176967180637	-5.05751262436734	4.2476031799886e-07	6.27549146314202e-05
Contig33072	#N/A	0.329696659432666	-30	5.93069961206709	-5.05842513739181	4.22733144337216e-07	6.27549146314202e-05
Contig33094	#N/A	0.390852995171083	-30	5.93047028699	-5.05862074139595	4.22299820947025e-07	6.27549146314202e-05
Contig33142	ref|XP_014098572.1| PREDICTED: probable protein phosphatase 2C T23F11.1 [Bactrocera oleae]	1.49208430996312	-30	5.92259555974906	-5.06534672127284	4.07657682121256e-07	6.27549146314202e-05
Contig33372	ref|XP_011705675.1| PREDICTED: transmembrane protein 43 homolog isoform X2 [Wasmannia auropunctata]	0.723847459130555	-30	5.9277312783036	-5.06095816283112	4.17154753250614e-07	6.27549146314202e-05
Contig33451	#N/A	0.276807356254641	-30	5.92769542328709	-5.06098877518981	4.17087773068561e-07	6.27549146314202e-05
Contig33485	#N/A	0.502802251058225	-30	5.91603204958381	-5.07096644314334	3.95800564957089e-07	6.27549146314202e-05
Contig33735	ref|XP_002734090.1| PREDICTED: calmodulin-like [Saccoglossus kowalevskii]	0.425831951490555	-30	5.93282457326651	-5.05661336004792	4.26767232978408e-07	6.27549146314202e-05
Contig33822	#N/A	1.04834325409886	-30	5.91135935320466	-5.07497484207865	3.87547273479292e-07	6.27549146314202e-05
Contig33911	#N/A	0.519557823757167	-30	5.92708384513927	-5.06151098648666	4.15946765941581e-07	6.27549146314202e-05
Contig33926	#N/A	0.245946128230215	-30	5.93192780724072	-5.05737779940291	4.25060629587881e-07	6.27549146314202e-05
Contig33936	ref|XP_011872302.1| PREDICTED: EH domain-containing protein 3 isoform X1 [Vollenhovia emeryi]	0.344235602656187	-30	5.92749499873337	-5.0611599008368	4.16713539329746e-07	6.27549146314202e-05
Contig34049	ref|XP_011866087.1| PREDICTED: uncharacterized protein LOC105561048 [Vollenhovia emeryi]	0.347002775355126	-30	5.93281101154796	-5.05662491888016	4.26741378845063e-07	6.27549146314202e-05
Contig34280	ref|XP_012235316.1| PREDICTED: ABC transporter H family member 2-like [Linepithema humile]	2.27622777623835	-30	5.92090228147855	-5.06679532507138	4.04568878769803e-07	6.27549146314202e-05
Contig34415	#N/A	0.343563885879787	-30	5.92914461305158	-5.05975177835302	4.19802614756216e-07	6.27549146314202e-05
Contig34457	ref|XP_009059992.1| hypothetical protein LOTGIDRAFT_154010 [Lottia gigantea]	1.4919636934835	-30	5.92453210750892	-5.06369101485283	4.11215950784493e-07	6.27549146314202e-05
Contig34526	#N/A	0.679238184619207	-30	5.92899474397315	-5.05987967530164	4.1952113051118e-07	6.27549146314202e-05
Contig34544	#N/A	0.510560255728223	-30	5.92916727630915	-5.05973243829186	4.19845195526819e-07	6.27549146314202e-05
Contig34568	#N/A	0.341827907386163	-30	5.93027729781979	-5.0587853642239	4.2193546257899e-07	6.27549146314202e-05
Contig34662	ref|XP_011875564.1| PREDICTED: uncharacterized protein LOC105566285 [Vollenhovia emeryi]	3.44087226407847	-30	5.90538042075059	-5.08011302617942	3.77210373728433e-07	6.27549146314202e-05
Contig34931	ref|XP_011867475.1| PREDICTED: spermatogenesis-associated protein 6 [Vollenhovia emeryi]	0.306260901232886	-30	5.93117532881686	-5.05801942057652	4.23633300694983e-07	6.27549146314202e-05
Contig35217	ref|XP_011873858.1| PREDICTED: rotatin isoform X2 [Vollenhovia emeryi]	5.05651110265127	-30	5.91788648188479	-5.06937740219128	3.99119124451207e-07	6.27549146314202e-05
Contig3542	#N/A	0.508151501062068	-30	5.92939380259603	-5.05953913650756	4.20271014670138e-07	6.27549146314202e-05
Contig35788	ref|XP_011696594.1| PREDICTED: lutropin-choriogonadotropic hormone receptor isoform X1 [Wasmannia auropunctata]	1.14144378990577	-30	5.89844631383851	-5.08608511526437	3.65530060070795e-07	6.27549146314202e-05
Contig35867	ref|XP_011858733.1| PREDICTED: uncharacterized protein LOC105556257, partial [Vollenhovia emeryi]	0.368891643536374	-30	5.92090558247451	-5.06679250025503	4.04574879986808e-07	6.27549146314202e-05
Contig36534	ref|XP_011059413.1| PREDICTED: rap1 GTPase-activating protein 1-like isoform X4 [Acromyrmex echinatior]	0.420945641528282	-30	5.92962244221821	-5.05934404632638	4.20701195887273e-07	6.27549146314202e-05
Contig36591	#N/A	0.187110082100697	-30	5.9326260094666	-5.05678260388055	4.26388828956454e-07	6.27549146314202e-05
Contig36666	#N/A	0.735897065211919	-30	5.93254236662878	-5.05685389939284	4.26229519722707e-07	6.27549146314202e-05
Contig36695	ref|XP_015930380.1| PREDICTED: lysosomal protective protein-like [Parasteatoda tepidariorum]	0.363681964978708	-30	5.92988731363389	-5.05911805963404	4.21200036159129e-07	6.27549146314202e-05
Contig36739	#N/A	0.555735572672004	-30	5.93242372173319	-5.05695503342019	4.26003635073952e-07	6.27549146314202e-05
Contig36809	#N/A	1.17734835670087	-30	5.92466454064727	-5.06357782692664	4.11460293532675e-07	6.27549146314202e-05
Contig36880	#N/A	0.431290754805259	-30	5.92698729541905	-5.06159343772963	4.15766889363439e-07	6.27549146314202e-05
Contig3718	ref|XP_009019792.1| hypothetical protein HELRODRAFT_184986 [Helobdella robusta]	0.500167064302193	-30	5.92083415861717	-5.06685362168742	4.04445048958362e-07	6.27549146314202e-05
Contig37214	ref|XP_013081452.1| PREDICTED: uncharacterized protein LOC106066894 [Biomphalaria glabrata]	0.372078346850968	-30	5.92349413274233	-5.06457832618993	4.09305325285027e-07	6.27549146314202e-05
Contig37356	ref|XP_012534360.1| PREDICTED: venom allergen 3-like [Monomorium pharaonis]	0.256969331166995	-30	5.92592015063754	-5.06250493381563	4.13783353385805e-07	6.27549146314202e-05
Contig37357	ref|XP_011859690.1| PREDICTED: uncharacterized protein LOC105557132 [Vollenhovia emeryi]	0.287614832818453	-30	5.93177657434065	-5.05750673917361	4.24773422513161e-07	6.27549146314202e-05
Contig37804	#N/A	0.40457220322225	-30	5.92841226119051	-5.06037682237294	4.18428704269031e-07	6.27549146314202e-05
Contig37912	#N/A	0.173111689439961	-30	5.93400637807257	-5.05560629507519	4.29025588903768e-07	6.27549146314202e-05
Contig37964	#N/A	0.479047574195379	-30	5.92336336221896	-5.06469013725366	4.09065173830841e-07	6.27549146314202e-05
Contig38018	ref|XP_012249434.1| PREDICTED: pyruvate kinase-like isoform X2 [Bombus impatiens]	0.238541759004704	-30	5.93119037917373	-5.05800658588526	4.23661806940227e-07	6.27549146314202e-05
Contig38040	ref|XP_017032287.1| PREDICTED: gluconokinase-like [Drosophila kikkawai]	0.408909720486043	-30	5.92928479946421	-5.05963215035832	4.20066065051233e-07	6.27549146314202e-05
Contig38043	#N/A	0.224146290104463	-30	5.93217971809521	-5.05716303713618	4.25539418057232e-07	6.27549146314202e-05
Contig38878	#N/A	0.773297975143157	-30	5.91630170173952	-5.07073531952898	3.9628158436791e-07	6.27549146314202e-05
Contig38902	#N/A	0.202630985358998	-30	5.93356092629029	-5.05598583593819	4.28173113214579e-07	6.27549146314202e-05
Contig39093	#N/A	0.872748244628652	-30	5.92754567499186	-5.06111663155446	4.16808134072484e-07	6.27549146314202e-05
Contig39855	ref|XP_011696432.1| PREDICTED: uncharacterized protein C4orf29 isoform X1 [Wasmannia auropunctata]	0.200605329968536	-30	5.93195283678964	-5.05735646007529	4.2510817996884e-07	6.27549146314202e-05
Contig40256	#N/A	1.1850072636055	-30	5.92169342635541	-5.06611839553875	4.06009448985722e-07	6.27549146314202e-05
Contig4026	ref|XP_011880629.1| PREDICTED: endothelin-converting enzyme 1 [Vollenhovia emeryi]	4.87199138214692	-30	5.89102777111238	-5.09248999760448	3.53391363464337e-07	6.27549146314202e-05
Contig40397	ref|XP_392583.3| PREDICTED: uncharacterized protein LOC409057 isoform X2 [Apis mellifera]	0.170334585459853	-30	5.93294320128449	-5.05651225407062	4.26993445462311e-07	6.27549146314202e-05
Contig40412	#N/A	1.25393422897304	-30	5.923736801405	-5.06437085335806	4.09751302656724e-07	6.27549146314202e-05
Contig40518	#N/A	0.738747465204859	-30	5.92089231275768	-5.06680385579034	4.04550756096838e-07	6.27549146314202e-05
Contig40883	ref|XP_011704989.1| PREDICTED: uncharacterized protein LOC105460252 isoform X2 [Wasmannia auropunctata]	0.468258114536123	-30	5.92851193105172	-5.06029174755797	4.18615452008696e-07	6.27549146314202e-05
Contig40947	#N/A	0.288122369650161	-30	5.93036224458973	-5.05871290195958	4.22095805335034e-07	6.27549146314202e-05
Contig40948	ref|XP_011863648.1| PREDICTED: T-box transcription factor TBX20-like isoform X2 [Vollenhovia emeryi]	0.225915356696576	-30	5.93389427558101	-5.05570180504481	4.28810912689313e-07	6.27549146314202e-05
Contig41074	#N/A	0.3640111834898	-30	5.92574137178302	-5.06265766893792	4.13451875961078e-07	6.27549146314202e-05
Contig41158	#N/A	0.502411873141456	-30	5.93288689218221	-5.05656024549046	4.26886056003688e-07	6.27549146314202e-05
Contig41221	#N/A	0.351207457001804	-30	5.93070881774966	-5.05841728567331	4.22750547275416e-07	6.27549146314202e-05
Contig41228	#N/A	0.250146300086328	-30	5.93157489547245	-5.05767869894029	4.24390681821546e-07	6.27549146314202e-05
Contig41405	#N/A	0.440015601039804	-30	5.92758683430244	-5.06108148874219	4.16884978078283e-07	6.27549146314202e-05
Contig41842	#N/A	0.243169839396323	-30	5.93149901752983	-5.05774339864823	4.24246762140924e-07	6.27549146314202e-05
Contig41908	ref|XP_780901.2| PREDICTED: endoglucanase 6 [Strongylocentrotus purpuratus]	1.13322744203031	-30	5.92707441232293	-5.06151904177671	4.15929189119435e-07	6.27549146314202e-05
Contig41911	#N/A	0.264984144146356	-30	5.93310938644052	-5.05637062221737	4.27310524262944e-07	6.27549146314202e-05
Contig42465	#N/A	0.306762915135741	-30	5.92938983011028	-5.05954252622348	4.20263543970819e-07	6.27549146314202e-05
Contig42576	#N/A	0.245748097213308	-30	5.93181007957649	-5.05747817235272	4.2483703756914e-07	6.27549146314202e-05
Contig43112	ref|XP_012058171.1| PREDICTED: GATA zinc finger domain-containing protein 14 [Atta cephalotes]	0.142129391095888	-30	5.9353954091508	-5.05442315666923	4.31693522588384e-07	6.27549146314202e-05
Contig43349	ref|XP_011061475.1| PREDICTED: dolichyldiphosphatase 1-like isoform X1 [Acromyrmex echinatior]	1.19118035480896	-30	5.92686364139243	-5.06169903935093	4.155366172713e-07	6.27549146314202e-05
Contig43631	ref|XP_009030538.1| hypothetical protein HELRODRAFT_96384 [Helobdella robusta]	0.913585881645314	-30	5.92835100221864	-5.06042911237421	4.18313962366019e-07	6.27549146314202e-05
Contig43735	#N/A	0.261240556753574	-30	5.93083204959773	-5.05831218100921	4.22983573030315e-07	6.27549146314202e-05
Contig43820	ref|XP_014295228.1| PREDICTED: catalase-like [Microplitis demolitor]	0.3147048506631	-30	5.92924126158879	-5.0596693027737	4.1998422921403e-07	6.27549146314202e-05
Contig43822	ref|XP_011859300.1| PREDICTED: zinc finger BED domain-containing protein 1-like [Vollenhovia emeryi]	0.369667677525129	-30	5.93304422367848	-5.05642615645295	4.27186169737733e-07	6.27549146314202e-05
Contig43835	#N/A	0.319141911717388	-30	5.93115359634181	-5.05803795378074	4.23592141141959e-07	6.27549146314202e-05
Contig44118	ref|XP_011871951.1| PREDICTED: intraflagellar transport protein 81 homolog [Vollenhovia emeryi]	0.718216898806807	-30	5.92793923196545	-5.0607806230924	4.17543416853459e-07	6.27549146314202e-05
Contig44364	ref|XP_012525531.1| PREDICTED: uncharacterized protein LOC105830633 [Monomorium pharaonis]	0.243387705819968	-30	5.93316139872737	-5.05632629620271	4.27409805944686e-07	6.27549146314202e-05
Contig44435	#N/A	0.581536463390001	-30	5.93004534605965	-5.05898323693834	4.21497913872067e-07	6.27549146314202e-05
Contig44485	ref|XP_014790039.1| PREDICTED: polygalacturonase-like, partial [Octopus bimaculoides]	0.768201566974078	-30	5.92853356184757	-5.06027328462163	4.18655990621226e-07	6.27549146314202e-05
Contig44672	#N/A	0.4974189106438	-30	5.91504191440349	-5.07181528620248	3.94038764394962e-07	6.27549146314202e-05
Contig44737	ref|XP_011880619.1| PREDICTED: uncharacterized protein LOC105569073 isoform X2 [Vollenhovia emeryi]	1.50687249033104	-30	5.91444447040649	-5.07232761252692	3.92979079518607e-07	6.27549146314202e-05
Contig45154	#N/A	0.272341167535241	-30	5.93107860224471	-5.05810190892531	4.23450135687883e-07	6.27549146314202e-05
Contig45172	ref|XP_012246086.1| PREDICTED: synaptic vesicle 2-related protein-like [Bombus impatiens]	0.469009941485834	-30	5.92961353205072	-5.05935164877848	4.20684424241252e-07	6.27549146314202e-05
Contig45284	#N/A	1.68134429672321	-30	5.92895222934957	-5.05991595808339	4.19441310076466e-07	6.27549146314202e-05
Contig45363	ref|XP_001949604.2| PREDICTED: maltase 1 [Acyrthosiphon pisum]	0.285393948896935	-30	5.93049047745582	-5.05860351922696	4.22337956168828e-07	6.27549146314202e-05
Contig45519	#N/A	0.333591193354389	-30	5.92994651353742	-5.05906755339417	4.21311601014683e-07	6.27549146314202e-05
Contig45692	#N/A	0.399313956112384	-30	5.93113409698452	-5.05805458272347	4.23555213960858e-07	6.27549146314202e-05
Contig45753	#N/A	0.596751216697886	-30	5.9200801613225	-5.06749894976054	4.03076726608641e-07	6.27549146314202e-05
Contig45762	ref|XP_015757446.1| PREDICTED: isocitrate lyase-like [Acropora digitifera]	0.882396486818098	-30	5.92750563624519	-5.06115081807053	4.16733394237542e-07	6.27549146314202e-05
Contig45799	#N/A	0.218926978070186	-30	5.93381323690338	-5.05577085126727	4.28655783155299e-07	6.27549146314202e-05
Contig45871	#N/A	0.239100404347007	-30	5.93411918791427	-5.05551018609459	4.29241716166807e-07	6.27549146314202e-05
Contig46020	#N/A	0.29019767855681	-30	5.92509049411177	-5.06321380742005	4.1224706529483e-07	6.27549146314202e-05
Contig46198	#N/A	0.329264078830885	-30	5.93317736923772	-5.05631268593851	4.27440294763973e-07	6.27549146314202e-05
Contig46548	ref|XP_011859467.1| PREDICTED: uncharacterized protein LOC105556962 [Vollenhovia emeryi]	0.370892036770803	-30	5.93122398325167	-5.05797792912773	4.23725461161814e-07	6.27549146314202e-05
Contig46604	#N/A	0.44603912923627	-30	5.92559840864439	-5.06277981245495	4.13186975160249e-07	6.27549146314202e-05
Contig46839	#N/A	0.237692881642691	-30	5.93349656492801	-5.05604067883437	4.28050067389984e-07	6.27549146314202e-05
Contig46966	#N/A	0.221622279977597	-30	5.93179172258363	-5.05749382362557	4.24802182829079e-07	6.27549146314202e-05
Contig47108	ref|XP_017117958.1| PREDICTED: UPF0053 protein sll0260-like [Drosophila elegans]	0.508224879759296	-30	5.92136899655117	-5.06639596645187	4.05418154122316e-07	6.27549146314202e-05
Contig4748	ref|XP_011162750.1| PREDICTED: calpain-A-like isoform X9 [Solenopsis invicta]	0.712900508205457	-30	5.92812584463679	-5.06062131375656	4.17892468503657e-07	6.27549146314202e-05
Contig47559	ref|XP_014228684.1| PREDICTED: aspartate aminotransferase, mitochondrial [Trichogramma pretiosum]	0.271344840742753	-30	5.93074856866077	-5.05838338157275	4.22825701941632e-07	6.27549146314202e-05
Contig47682	ref|XP_012062796.1| PREDICTED: probable phenylalanine--tRNA ligase beta subunit [Atta cephalotes]	0.849517729399157	-30	5.92965322926451	-5.05931777796744	4.20759151052562e-07	6.27549146314202e-05
Contig47717	ref|XP_013385965.1| PREDICTED: vesicle transport through interaction with t-SNAREs homolog 1A-like [Lingula anatina]	0.324645049029802	-30	5.93105846971682	-5.0581190782684	4.23412020846728e-07	6.27549146314202e-05
Contig47895	ref|XP_008189065.1| PREDICTED: uncharacterized MFS-type transporter YusP-like [Acyrthosiphon pisum]	0.532903814803093	-30	5.92848727014657	-5.06031279700434	4.18569238880336e-07	6.27549146314202e-05
Contig47938	#N/A	0.117862895083212	-30	5.93678530204153	-5.05323983834882	4.34377867888887e-07	6.27549146314202e-05
Contig48050	#N/A	0.225202598858022	-30	5.93189934944709	-5.05740206175216	4.25006572077532e-07	6.27549146314202e-05
Contig48063	#N/A	0.386284964387253	-30	5.92628961477125	-5.06218932082312	4.14469133363839e-07	6.27549146314202e-05
Contig48126	#N/A	1.44826054573827	-30	5.92645180682429	-5.06205078145664	4.14770504958993e-07	6.27549146314202e-05
Contig48195	#N/A	0.274284894964612	-30	5.93329551410808	-5.05621200371135	4.2766590165333e-07	6.27549146314202e-05
Contig48219	ref|XP_011159374.1| PREDICTED: uncharacterized protein LOC105195594 [Solenopsis invicta]	0.419839984663113	-30	5.92770195597838	-5.06098319766963	4.170999759718e-07	6.27549146314202e-05
Contig48449	ref|XP_003699101.1| PREDICTED: 50S ribosomal protein L14, chloroplastic-like [Apis florea]	0.230654902341873	-30	5.93215522537463	-5.05718391718339	4.25492845501217e-07	6.27549146314202e-05
Contig48907	#N/A	0.612543921211621	-30	5.92508836884447	-5.06321562354195	4.12243136428254e-07	6.27549146314202e-05
Contig48922	#N/A	1.06568895140925	-30	5.92699057652977	-5.06159063569237	4.15773001087967e-07	6.27549146314202e-05
Contig48976	#N/A	0.170334585459853	-30	5.93294320128449	-5.05651225407062	4.26993445462311e-07	6.27549146314202e-05
Contig49100	#N/A	0.445469794186715	-30	5.92030835972051	-5.06730362291741	4.0349041607877e-07	6.27549146314202e-05
Contig49409	#N/A	0.515444990630179	-30	5.91795663428726	-5.06931730898246	3.99245148750544e-07	6.27549146314202e-05
Contig49611	#N/A	0.319989024784545	-30	5.92447028175357	-5.06374385780873	4.11101924784855e-07	6.27549146314202e-05
Contig49624	ref|XP_017126735.1| PREDICTED: aldehyde reductase YahK-like [Drosophila elegans]	0.617536139561652	-30	5.92866356382112	-5.06016232445218	4.18899702915174e-07	6.27549146314202e-05
Contig50491	#N/A	0.499403221759028	-30	5.92895953021121	-5.05990972735334	4.19455016351057e-07	6.27549146314202e-05
Contig50492	#N/A	0.166197658241972	-30	5.93422635568667	-5.05541888729127	4.2944712371662e-07	6.27549146314202e-05
Contig50539	#N/A	0.170607475148828	-30	5.93383501872133	-5.05575229263193	4.28697474429988e-07	6.27549146314202e-05
Contig50791	#N/A	0.379212969232696	-30	5.92863041988354	-5.06019061322923	4.18837556607036e-07	6.27549146314202e-05
Contig51312	#N/A	0.164870401778196	-30	5.93424545975669	-5.05540261242076	4.29483749502042e-07	6.27549146314202e-05
Contig51435	ref|XP_014679450.1| PREDICTED: gamma-glutamylaminecyclotransferase C-like isoform X3 [Priapulus caudatus]	0.400353596189123	-30	5.9298370286213	-5.05916096095056	4.21105292451776e-07	6.27549146314202e-05
Contig51765	#N/A	0.257372409560028	-30	5.93115851607456	-5.05803375827746	4.23601458407115e-07	6.27549146314202e-05
Contig51784	#N/A	0.450771080559171	-30	5.92609796452745	-5.06235303222704	4.14113276121448e-07	6.27549146314202e-05
Contig51791	ref|XP_013390275.1| PREDICTED: aquaporin AQPAe.a-like [Lingula anatina]	1.75424167310539	-30	5.91391258368807	-5.07278380859854	3.92037808226345e-07	6.27549146314202e-05
Contig51822	ref|XP_015599228.1| PREDICTED: CCR4-NOT transcription complex subunit 7 [Cephus cinctus]	0.324645049029802	-30	5.93105846971682	-5.0581190782684	4.23412020846728e-07	6.27549146314202e-05
Contig51913	#N/A	0.25152536297933	-30	5.93168962641987	-5.05758087314269	4.24608377476737e-07	6.27549146314202e-05
Contig52149	#N/A	2.01959662662835	-30	5.92656712278203	-5.06195228679321	4.14984893893797e-07	6.27549146314202e-05
Contig52298	#N/A	0.296959771279882	-30	5.92722296803206	-5.06139218345628	4.16206080039738e-07	6.27549146314202e-05
Contig5232	ref|XP_011705446.1| PREDICTED: protein spire homolog 1-like isoform X1 [Wasmannia auropunctata]	2.92431307095237	-30	5.92706672782425	-5.06152560408454	4.1591487054742e-07	6.27549146314202e-05
Contig52409	ref|XP_003707284.1| PREDICTED: probable phospholipid hydroperoxide glutathione peroxidase [Megachile rotundata]	1.21600300729711	-30	5.92309297663152	-5.06492133727421	4.08569026010201e-07	6.27549146314202e-05
Contig52528	#N/A	0.170607475148828	-30	5.93383501872133	-5.05575229263193	4.28697474429988e-07	6.27549146314202e-05
Contig5286	ref|XP_012060796.1| PREDICTED: lysM and putative peptidoglycan-binding domain-containing protein 2 [Atta cephalotes]	1.61606444222784	-30	5.9171082329722	-5.07004415312695	3.97723422798418e-07	6.27549146314202e-05
Contig53192	ref|XP_011688585.1| PREDICTED: uncharacterized protein LOC105450444 [Wasmannia auropunctata]	0.450965081766609	-30	5.92743935062627	-5.06120741612149	4.16609685893596e-07	6.27549146314202e-05
Contig53232	ref|XP_013086795.1| PREDICTED: glyceraldehyde-3-phosphate dehydrogenase-like [Biomphalaria glabrata]	1.99615859995741	-30	5.91795726511642	-5.06931676861473	3.99246282155358e-07	6.27549146314202e-05
Contig53394	ref|XP_011878775.1| PREDICTED: trace amine-associated receptor 9 [Vollenhovia emeryi]	0.599935010302544	-30	5.92811190718049	-5.06063321167439	4.17866390075319e-07	6.27549146314202e-05
Contig53504	ref|XP_011155399.1| PREDICTED: proton-coupled amino acid transporter 1-like [Solenopsis invicta]	0.206923070403432	-30	5.93206452909145	-5.057261237277	4.25320427291311e-07	6.27549146314202e-05
Contig53574	#N/A	0.196793239815965	-30	5.93217635314373	-5.0571659057475	4.2553301938176e-07	6.27549146314202e-05
Contig53662	#N/A	0.202726011268009	-30	5.93216459910431	-5.05717592605736	4.25510668977952e-07	6.27549146314202e-05
Contig53848	#N/A	0.4353405089279	-30	5.9284156901598	-5.06037389547348	4.18435127771198e-07	6.27549146314202e-05
Contig54055	#N/A	0.319510670014271	-30	5.93031061844623	-5.05875694043496	4.21998351049849e-07	6.27549146314202e-05
Contig54231	ref|XP_011865391.1| PREDICTED: uncharacterized protein KIAA0556-like isoform X1 [Vollenhovia emeryi]	0.783788317913268	-30	5.92725573909783	-5.06136419964329	4.16267183643305e-07	6.27549146314202e-05
Contig5437	ref|XP_011503959.1| PREDICTED: malate synthase, glyoxysomal-like, partial [Ceratosolen solmsi marchali]	1.19141599751506	-30	5.92285401655374	-5.06512568369121	4.08130988588861e-07	6.27549146314202e-05
Contig54492	#N/A	0.213004824744304	-30	5.93288842228097	-5.05655894139775	4.26888973801929e-07	6.27549146314202e-05
Contig54549	ref|XP_011168025.1| PREDICTED: beta-1,3-glucosyltransferase-like [Solenopsis invicta]	0.579474806880386	-30	5.93663663879506	-5.05336637987145	4.3409004262832e-07	6.27549146314202e-05
Contig54770	ref|XP_013304299.1| acyl-CoA dehydrogenase protein [Necator americanus]	0.548462027883017	-30	5.93000830434371	-5.05901483780809	4.21428076574216e-07	6.27549146314202e-05
Contig54843	#N/A	0.400306730052133	-30	5.93128278167181	-5.05792778801622	4.23836860001169e-07	6.27549146314202e-05
Contig55127	ref|XP_011875754.1| PREDICTED: uncharacterized protein LOC105566402 [Vollenhovia emeryi]	0.780170612080593	-30	5.91989403319893	-5.06765827762443	4.02739583719259e-07	6.27549146314202e-05
Contig55150	ref|XP_011690494.1| PREDICTED: uncharacterized protein LOC105451620 [Wasmannia auropunctata]	0.283550470376802	-30	5.9302283398851	-5.05882712782376	4.21843075786225e-07	6.27549146314202e-05
Contig55224	ref|XP_011700687.1| PREDICTED: DNA excision repair protein ERCC-6-like [Wasmannia auropunctata]	1.25220546151165	-30	5.9268479140272	-5.06171247097438	4.15507337452061e-07	6.27549146314202e-05
Contig55457	#N/A	0.883839647679754	-30	5.92029261969929	-5.06731709513436	4.03461869656053e-07	6.27549146314202e-05
Contig55476	#N/A	0.334819523132641	-30	5.93084315907094	-5.05830270593422	4.23004586145471e-07	6.27549146314202e-05
Contig55477	#N/A	0.325291831150844	-30	5.93125674019174	-5.05794999510174	4.23787518886821e-07	6.27549146314202e-05
Contig55553	#N/A	0.157599635227079	-30	5.93473202521734	-5.05498813973852	4.30417515904945e-07	6.27549146314202e-05
Contig55713	#N/A	0.613961718254671	-30	5.92454144273531	-5.06368303605777	4.11233170301755e-07	6.27549146314202e-05
Contig55731	#N/A	0.309153938719213	-30	5.92168791514232	-5.066123110488	4.05999398031118e-07	6.27549146314202e-05
Contig55780	ref|XP_012542484.1| PREDICTED: U1 small nuclear ribonucleoprotein A [Monomorium pharaonis]	1.521008460344	-30	5.92651501731691	-5.06199679108918	4.14888010143051e-07	6.27549146314202e-05
Contig55939	ref|XP_011640612.1| PREDICTED: protein unc-45 homolog B isoform X2 [Pogonomyrmex barbatus]	0.270797440996776	-30	5.93075521443932	-5.05837771334087	4.22838267876318e-07	6.27549146314202e-05
Contig56081	ref|XP_009045956.1| hypothetical protein LOTGIDRAFT_137449 [Lottia gigantea]	0.349027296467648	-30	5.93331419150434	-5.05619608733273	4.27701577297197e-07	6.27549146314202e-05
Contig56145	#N/A	0.117862895083212	-30	5.93678530204153	-5.05323983834882	4.34377867888887e-07	6.27549146314202e-05
Contig56156	ref|XP_011860276.1| PREDICTED: uncharacterized protein LOC105557606 [Vollenhovia emeryi]	0.268744503460341	-30	5.93074176970335	-5.05838918046512	4.22812846717832e-07	6.27549146314202e-05
Contig56161	#N/A	0.310607404447471	-30	5.9306212803053	-5.05849194916989	4.2258508736065e-07	6.27549146314202e-05
Contig56275	#N/A	0.88128399839567	-30	5.92807619953495	-5.06066369429487	4.17799583966563e-07	6.27549146314202e-05
Contig56470	ref|XP_011863304.1| PREDICTED: cation-independent mannose-6-phosphate receptor [Vollenhovia emeryi]	0.316023935599779	-30	5.93029382475737	-5.05877126606411	4.21966654042826e-07	6.27549146314202e-05
Contig56599	ref|XP_013401429.1| PREDICTED: peroxisomal acyl-coenzyme A oxidase 1-like isoform X2 [Lingula anatina]	0.684739230967046	-30	5.92853301669255	-5.06027374993631	4.18654968894781e-07	6.27549146314202e-05
Contig56927	#N/A	0.712112039610214	-30	5.9286964343802	-5.06013426931957	4.18961344727319e-07	6.27549146314202e-05
Contig57023	ref|XP_011706192.1| PREDICTED: uncharacterized protein LOC105461394 isoform X2 [Wasmannia auropunctata]	0.584434010058396	-30	5.93217441395702	-5.05716755889999	4.25529331930176e-07	6.27549146314202e-05
Contig57265	#N/A	0.376689982361974	-30	5.93009358685578	-5.05894208254923	4.2158888099852e-07	6.27549146314202e-05
Contig58017	ref|XP_011693229.1| PREDICTED: ejaculatory bulb-specific protein 3-like [Wasmannia auropunctata]	0.273968360208517	-30	5.93015195173744	-5.05889229216302	4.2169896234115e-07	6.27549146314202e-05
Contig58436	ref|XP_011873949.1| PREDICTED: chymotrypsin-2-like [Vollenhovia emeryi]	138.154795083026	-30	5.93121490978521	-5.05798566673188	4.23708272991598e-07	6.27549146314202e-05
Contig58548	#N/A	0.290448267538712	-30	5.92785574172538	-5.06085190110718	4.17387335631892e-07	6.27549146314202e-05
Contig59184	ref|XP_002170450.3| PREDICTED: NADH-ubiquinone oxidoreductase 20 kDa subunit-like [Hydra vulgaris]	2.05853716091746	-30	5.92282626948575	-5.0651494126308	4.0808015255669e-07	6.27549146314202e-05
Contig59784	#N/A	0.378136768163135	-30	5.93425764039451	-5.05539223571789	4.29507103328215e-07	6.27549146314202e-05
Contig60093	ref|XP_011862804.1| PREDICTED: uncharacterized protein LOC105559258 [Vollenhovia emeryi]	2.17444557457512	-30	5.92692166131857	-5.06164948927735	4.15644649519232e-07	6.27549146314202e-05
Contig60185	#N/A	0.377100098860295	-30	5.9263314524881	-5.06215358363138	4.14546854032879e-07	6.27549146314202e-05
Contig60456	#N/A	0.242485212859967	-30	5.9314506396609	-5.05778465041986	4.24155025231188e-07	6.27549146314202e-05
Contig60510	ref|XP_013065160.1| PREDICTED: enolase-like [Biomphalaria glabrata]	1.68833131326643	-30	5.66149432835212	-5.29895435022577	1.16467745971476e-07	6.27549146314202e-05
Contig60626	ref|XP_014212034.1| PREDICTED: serine/threonine-protein kinase pelle-like [Copidosoma floridanum]	0.919861484841833	-30	5.92763733973991	-5.06103836664818	4.16979288424473e-07	6.27549146314202e-05
Contig60733	#N/A	1.27041887569051	-30	5.92240570581375	-5.06550910055864	4.07310317801795e-07	6.27549146314202e-05
Contig60756	#N/A	0.316149628601899	-30	5.93007606988496	-5.05895702625987	4.21555847424893e-07	6.27549146314202e-05
Contig61167	ref|XP_011684786.1| PREDICTED: leucine-rich repeat flightless-interacting protein 2 [Wasmannia auropunctata]	2.00104873424355	-30	5.89785887007042	-5.08659170402323	3.64555486696414e-07	6.27549146314202e-05
Contig61306	#N/A	0.22327955800484	-30	5.93215694441888	-5.05718245169234	4.25496114091224e-07	6.27549146314202e-05
Contig61389	ref|XP_014772262.1| PREDICTED: rab GDP dissociation inhibitor alpha-like [Octopus bimaculoides]	0.335637201296776	-30	5.93011120860117	-5.05892704954459	4.21622114479367e-07	6.27549146314202e-05
Contig61733	ref|XP_012054020.1| PREDICTED: TFIIH basal transcription factor complex helicase XPD subunit [Atta cephalotes]	2.16400317735532	-30	5.9098239005223	-5.07629338961329	3.848688698982e-07	6.27549146314202e-05
Contig61821	ref|XP_011879029.1| PREDICTED: vesicle-associated membrane protein 724-like isoform X3 [Vollenhovia emeryi]	1.39805024039175	-30	5.92678216626629	-5.06176862223016	4.15384953950044e-07	6.27549146314202e-05
Contig61825	#N/A	0.194394061315794	-30	5.93218750525608	-5.05715639861673	4.25554226181442e-07	6.27549146314202e-05
Contig62240	ref|XP_002740964.1| PREDICTED: ADP-ribosylation factor 1-like isoform X3 [Saccoglossus kowalevskii]	0.723776146915953	-30	5.92797505664334	-5.06075003915202	4.17610405381734e-07	6.27549146314202e-05
Contig62322	#N/A	0.281128933424475	-30	5.93303037704904	-5.05643795724528	4.27159749420461e-07	6.27549146314202e-05
Contig62393	ref|XP_011869787.1| PREDICTED: katanin p80 WD40 repeat-containing subunit B1 isoform X1 [Vollenhovia emeryi]	0.256011618497286	-30	5.93215022108388	-5.05718818336307	4.25483330472031e-07	6.27549146314202e-05
Contig62406	#N/A	0.264131282931465	-30	5.93011703033661	-5.05892208307685	4.21633094410803e-07	6.27549146314202e-05
Contig62469	ref|XP_011859152.1| PREDICTED: uncharacterized protein LOC105556668 [Vollenhovia emeryi]	0.39410686686696	-30	5.93149001676248	-5.05775107354469	4.24229693029936e-07	6.27549146314202e-05
Contig62543	#N/A	0.312121406001116	-30	5.92866148891436	-5.06016409540251	4.18895812135137e-07	6.27549146314202e-05
Contig62750	#N/A	0.157599635227079	-30	5.93473202521734	-5.05498813973852	4.30417515904945e-07	6.27549146314202e-05
Contig62859	#N/A	0.433164223172766	-30	5.92873710001258	-5.06009956149621	4.19037615722651e-07	6.27549146314202e-05
Contig62912	ref|XP_015761659.1| PREDICTED: short-chain specific acyl-CoA dehydrogenase, mitochondrial-like [Acropora digitifera]	1.89652749006839	-30	5.91395083857229	-5.07275099487341	3.92105440245525e-07	6.27549146314202e-05
Contig62919	#N/A	1.58782281966515	-30	5.90109602774026	-5.0838013580823	3.6995484963177e-07	6.27549146314202e-05
Contig63197	ref|XP_011168069.1| PREDICTED: uncharacterized protein LOC105201663 isoform X1 [Solenopsis invicta]	0.385263725478221	-30	5.9296357641232	-5.05933267967531	4.20726272874786e-07	6.27549146314202e-05
Contig63283	ref|XP_014472522.1| PREDICTED: WD repeat-containing protein 81 isoform X1 [Dinoponera quadriceps]	0.306401315212081	-30	5.9267265337864	-5.06181613559854	4.15281424172706e-07	6.27549146314202e-05
Contig63389	#N/A	0.279138282029433	-30	5.93070562202823	-5.05842001136795	4.22744505832343e-07	6.27549146314202e-05
Contig63482	ref|XP_011699799.1| PREDICTED: SUN domain-containing ossification factor isoform X2 [Wasmannia auropunctata]	0.325185167940783	-30	5.92936228547365	-5.05956603014409	4.20211746480401e-07	6.27549146314202e-05
Contig63951	ref|XP_012055967.1| PREDICTED: nucleosome assembly protein 1-like 1-B [Atta cephalotes]	0.588488944680438	-30	5.9178566450425	-5.0694029611433	3.99065535204482e-07	6.27549146314202e-05
Contig64265	#N/A	0.322555753965025	-30	5.93010409250433	-5.0589331202331	4.21608693696969e-07	6.27549146314202e-05
Contig64284	#N/A	0.264507784477342	-30	5.92720159309323	-5.06141043607459	4.16166229492604e-07	6.27549146314202e-05
Contig64299	#N/A	0.505364681444035	-30	5.92581104058462	-5.06259814809085	4.13581022169477e-07	6.27549146314202e-05
Contig64482	#N/A	0.284963504111185	-30	5.93413895155909	-5.05549334872215	4.29279590403552e-07	6.27549146314202e-05
Contig65091	#N/A	0.262245654274625	-30	5.93144351382684	-5.05779072666995	4.24141514303752e-07	6.27549146314202e-05
Contig65230	ref|XP_011634768.1| PREDICTED: graves disease carrier protein homolog isoform X2 [Pogonomyrmex barbatus]	0.313675466530987	-30	5.92959939955521	-5.0593637071419	4.20657823804694e-07	6.27549146314202e-05
Contig65307	#N/A	0.362135707334948	-30	5.92981117729004	-5.05918301663531	4.21056592454217e-07	6.27549146314202e-05
Contig65366	#N/A	0.235370581406881	-30	5.93121343602902	-5.05798692351311	4.23705481264608e-07	6.27549146314202e-05
Contig65387	#N/A	0.373946720255097	-30	5.9329633265415	-5.056495101831	4.2703183301424e-07	6.27549146314202e-05
Contig65417	ref|XP_013111155.1| PREDICTED: probable asparagine synthetase [glutamine-hydrolyzing] [Stomoxys calcitrans]	0.602848812885185	-30	5.92880219696505	-5.06004400270884	4.19159734930429e-07	6.27549146314202e-05
Contig65430	ref|XP_012349669.1| PREDICTED: cyanelle 30S ribosomal protein S4-like, partial [Apis florea]	0.691020526992981	-30	5.92222367417881	-5.06566479932217	4.0697751278147e-07	6.27549146314202e-05
Contig65535	#N/A	0.17479315545419	-30	5.93425647332141	-5.0553932299473	4.29504865660656e-07	6.27549146314202e-05
Contig65577	#N/A	0.473601573545607	-30	5.91724525935008	-5.06992674548951	3.97968848669664e-07	6.27549146314202e-05
Contig65588	#N/A	0.237884731113111	-30	5.93349858325712	-5.05603895897989	4.28053925546795e-07	6.27549146314202e-05
Contig65703	ref|XP_003731900.2| PREDICTED: histidine ammonia-lyase, partial [Strongylocentrotus purpuratus]	0.961676017267016	-30	5.91309903322258	-5.07348174475784	3.90601962574944e-07	6.27549146314202e-05
Contig65817	ref|XP_013294314.1| ABC transporter, ATP-binding protein [Necator americanus]	0.243546614443971	-30	5.92856993599066	-5.0602422378251	4.18724167844054e-07	6.27549146314202e-05
Contig65824	#N/A	1.07811684812459	-30	5.91390923605131	-5.07278668010652	3.92031890327522e-07	6.27549146314202e-05
Contig66327	ref|XP_017128922.1| PREDICTED: cobalamin biosynthesis protein CobD-like [Drosophila elegans]	1.09653325698747	-30	5.9236727388693	-5.06442562283181	4.09633526312052e-07	6.27549146314202e-05
Contig66608	#N/A	0.234442764425815	-30	5.93224378586295	-5.0571084201719	4.25661263436134e-07	6.27549146314202e-05
Contig66789	ref|XP_015369268.1| PREDICTED: fructose-bisphosphate aldolase [Diuraphis noxia]	0.387466990580413	-30	5.93335487757297	-5.05616141609777	4.27779300808424e-07	6.27549146314202e-05
Contig66806	#N/A	0.264284522263882	-30	5.93339700329373	-5.056125518543	4.27859787754156e-07	6.27549146314202e-05
Contig67074	#N/A	0.451225451861058	-30	5.93006828734802	-5.05896366556282	4.21541171824223e-07	6.27549146314202e-05
Contig67150	#N/A	0.266751065472243	-30	5.93110176407924	-5.05808215628506	4.23493989377918e-07	6.27549146314202e-05
Contig67309	#N/A	0.33300506569388	-30	5.93081976287714	-5.05832266017919	4.22960334280931e-07	6.27549146314202e-05
Contig67728	ref|XP_015114902.1| PREDICTED: protein lifeguard 4-like [Diachasma alloeum]	0.489997803118694	-30	5.93020253378312	-5.05884914201434	4.21794385242364e-07	6.27549146314202e-05
Contig67920	ref|XP_017082551.1| PREDICTED: endonuclease III-like [Drosophila eugracilis]	0.484413572567918	-30	5.9217062242055	-5.06610744676464	4.0603278963948e-07	6.27549146314202e-05
Contig67933	#N/A	0.225938930122526	-30	5.93343494480651	-5.05609318700945	4.27932291725514e-07	6.27549146314202e-05
Contig68032	#N/A	0.233813046773624	-30	5.93185949382504	-5.05743604197461	4.24930873896155e-07	6.27549146314202e-05
Contig68113	ref|XP_015025882.1| uncharacterized protein Dvir_GJ10377, isoform B [Drosophila virilis]	0.370796644518117	-30	5.93339625594322	-5.05612615539546	4.27858359721557e-07	6.27549146314202e-05
Contig68161	#N/A	0.389396252593979	-30	5.92665056662576	-5.06188101740575	4.15140089454086e-07	6.27549146314202e-05
Contig68198	ref|XP_011871954.1| PREDICTED: probable 2-oxoglutarate dehydrogenase E1 component DHKTD1 homolog, mitochondrial [Vollenhovia emeryi]	1.68047536785616	-30	5.92246706700814	-5.0654566180906	4.07422557874197e-07	6.27549146314202e-05
Contig68617	#N/A	0.79031312414503	-30	5.91860239457711	-5.06876421154551	4.00406879954223e-07	6.27549146314202e-05
Contig69105	ref|XP_012535186.1| PREDICTED: glutamate-gated chloride channel-like isoform X10 [Monomorium pharaonis]	0.276655925036288	-30	5.93330852063449	-5.05620091988608	4.27690745104322e-07	6.27549146314202e-05
Contig69182	ref|XP_011171829.1| PREDICTED: uncharacterized protein LOC105204448 isoform X5 [Solenopsis invicta]	0.255625786719578	-30	5.93279031613038	-5.05664255796036	4.26701927674063e-07	6.27549146314202e-05
Contig6923	#N/A	0.454238737175247	-30	5.92531080644867	-5.06302554919992	4.12654525525717e-07	6.27549146314202e-05
Contig69283	#N/A	0.721784038881308	-30	5.92984613536766	-5.05915319135678	4.21122449377552e-07	6.27549146314202e-05
Contig69308	#N/A	0.507135611693766	-30	5.93454932299754	-5.05514376361219	4.30066681134919e-07	6.27549146314202e-05
Contig69321	ref|XP_017064538.1| PREDICTED: K(+)/H(+) antiporter NhaP2-like [Drosophila eugracilis]	0.397412979892971	-30	5.92172420366478	-5.06609206511743	4.06065582502346e-07	6.27549146314202e-05
Contig70082	#N/A	14.9698276099224	-30	5.93250981170982	-5.05688164910993	4.26167528735428e-07	6.27549146314202e-05
Contig70084	ref|XP_012565798.1| PREDICTED: uncharacterized protein LOC105849894, partial [Hydra vulgaris]	22.6920502460383	-30	5.93537447612616	-5.05444098273309	4.31653206964622e-07	6.27549146314202e-05
Contig70171	ref|XP_011170193.1| PREDICTED: uncharacterized protein K02A2.6-like [Solenopsis invicta]	0.584246251945004	-30	5.92345113522653	-5.06461508926632	4.0922634934232e-07	6.27549146314202e-05
Contig70336	ref|XP_009052774.1| hypothetical protein LOTGIDRAFT_150024 [Lottia gigantea]	0.205061625076563	-30	5.93290985474104	-5.05654067472924	4.26929845965388e-07	6.27549146314202e-05
Contig70403	ref|XP_017090312.1| PREDICTED: tyrosine--tRNA ligase-like [Drosophila bipectinata]	0.400840231998862	-30	5.93110152489314	-5.05808236026452	4.23493536491913e-07	6.27549146314202e-05
Contig70417	#N/A	0.380062621354901	-30	5.93304828879037	-5.05642269197111	4.27193926525547e-07	6.27549146314202e-05
Contig70483	ref|XP_012248206.1| PREDICTED: LOW QUALITY PROTEIN: uncharacterized protein LOC100740922 [Bombus impatiens]	0.876878545107376	-30	5.9220608635223	-5.06580406574152	4.06680054097058e-07	6.27549146314202e-05
Contig71004	#N/A	0.734389191275415	-30	5.93273835454772	-5.05668684630321	4.26602888868005e-07	6.27549146314202e-05
Contig71033	ref|XP_014092277.1| PREDICTED: protein GDAP2 homolog, partial [Bactrocera oleae]	0.795574375617246	-30	5.92939835623102	-5.05953525090348	4.20279578430271e-07	6.27549146314202e-05
Contig71037	ref|XP_015189390.1| PREDICTED: chitooligosaccharidolytic beta-N-acetylglucosaminidase [Polistes dominula]	0.418978125529251	-30	5.92925765389424	-5.05965531457324	4.20015039297343e-07	6.27549146314202e-05
Contig71289	ref|XP_012532063.1| PREDICTED: uncharacterized protein LOC105834263 [Monomorium pharaonis]	1.83832125605483	-30	5.92692828584134	-5.06164383187597	4.15656985872019e-07	6.27549146314202e-05
Contig71456	#N/A	0.356189009982575	-30	5.93038458786429	-5.05869384278903	4.22137988773064e-07	6.27549146314202e-05
Contig71561	#N/A	1.06794648346723	-30	5.92875279815158	-5.0600861633754	4.19067061890471e-07	6.27549146314202e-05
Contig71568	#N/A	0.299996947416146	-30	5.93420637910567	-5.05543590557112	4.29408828148395e-07	6.27549146314202e-05
Contig71783	#N/A	0.374537889707589	-30	5.92262377159262	-5.06532259298531	4.0770932211889e-07	6.27549146314202e-05
Contig71804	#N/A	0.15306355788138	-30	5.93569057106482	-5.05417181721759	4.32262341513015e-07	6.27549146314202e-05
Contig71812	ref|XP_011062975.1| PREDICTED: aminopeptidase N-like [Acromyrmex echinatior]	0.194394061315794	-30	5.93218750525608	-5.05715639861673	4.25554226181442e-07	6.27549146314202e-05
Contig71830	#N/A	8.13778243354752	-30	5.8961567055314	-5.08806015482185	3.61744636913977e-07	6.27549146314202e-05
Contig71937	#N/A	0.366707721536412	-30	5.92620549060226	-5.06226118003735	4.14312897656041e-07	6.27549146314202e-05
Contig71975	#N/A	5.03016896047315	-30	5.92619010183128	-5.06227432541011	4.14284323244365e-07	6.27549146314202e-05
Contig72100	#N/A	0.229201216803825	-30	5.93139990497693	-5.05782791256876	4.24058838144961e-07	6.27549146314202e-05
Contig72214	ref|XP_008212069.1| PREDICTED: uncharacterized protein LOC100680303 [Nasonia vitripennis]	0.157599635227079	-30	5.93473202521734	-5.05498813973852	4.30417515904945e-07	6.27549146314202e-05
Contig72338	#N/A	0.749525925064879	-30	5.9281267157753	-5.06062057009801	4.17894098542358e-07	6.27549146314202e-05
Contig73285	ref|XP_012234439.1| PREDICTED: uncharacterized protein LOC105679152 [Linepithema humile]	0.487867075478348	-30	5.92592650514649	-5.06249950517373	4.1379513975648e-07	6.27549146314202e-05
Contig73301	ref|XP_013416707.1| PREDICTED: V-type proton ATPase subunit E-like [Lingula anatina]	0.750477000520356	-30	5.92852586021196	-5.06027985832678	4.18641556465283e-07	6.27549146314202e-05
Contig73344	#N/A	0.289195916122358	-30	5.93155096308199	-5.05769910546503	4.24345283942828e-07	6.27549146314202e-05
Contig73436	#N/A	0.29336073586595	-30	5.93144317915532	-5.05779101204712	4.24140879759716e-07	6.27549146314202e-05
Contig74189	#N/A	1.03698509648766	-30	5.93182992773582	-5.05746124981216	4.24874726474395e-07	6.27549146314202e-05
Contig74338	ref|XP_011051107.1| PREDICTED: uncharacterized protein LOC105144108 [Acromyrmex echinatior]	5.40754454983442	-30	5.92619059043716	-5.06227390803288	4.14285230478016e-07	6.27549146314202e-05
Contig74454	#N/A	0.245334278336625	-30	5.93123496325597	-5.05796856571189	4.23746261779531e-07	6.27549146314202e-05
Contig74823	#N/A	0.276915411999795	-30	5.93367187053009	-5.05589130214576	4.28385289861937e-07	6.27549146314202e-05
Contig74944	#N/A	0.184914597094698	-30	5.93500808533571	-5.0547530127422	4.30948104405345e-07	6.27549146314202e-05
Contig74965	#N/A	0.338217538221144	-30	5.92040201745921	-5.06722346075998	4.03660312822346e-07	6.27549146314202e-05
Contig74969	#N/A	0.443329649924818	-30	5.92949630191698	-5.05945167556663	4.2046381683983e-07	6.27549146314202e-05
Contig74991	#N/A	0.223254535029936	-30	5.93335077567203	-5.05616491157176	4.27771464285576e-07	6.27549146314202e-05
Contig75480	#N/A	0.694441102574034	-30	5.92525485945689	-5.06307335491554	4.12551019530421e-07	6.27549146314202e-05
Contig75590	ref|XP_016664628.1| PREDICTED: ferric enterobactin transport ATP-binding protein FepC-like, partial [Acyrthosiphon pisum]	0.896407400581572	-30	5.92845900645872	-5.06033692184035	4.1851627992351e-07	6.27549146314202e-05
Contig75612	#N/A	0.42293347991736	-30	5.92968135290113	-5.05929378234167	4.2081209868044e-07	6.27549146314202e-05
Contig75620	#N/A	0.228991247507289	-30	5.93254541534946	-5.05685130068791	4.2623532549889e-07	6.27549146314202e-05
Contig75786	#N/A	0.173867264136827	-30	5.93411691393434	-5.05551212338853	4.2923735859574e-07	6.27549146314202e-05
Contig75804	ref|XP_011880563.1| PREDICTED: 3-hydroxyisobutyryl-CoA hydrolase, mitochondrial isoform X2 [Vollenhovia emeryi]	0.85694583579962	-30	5.92698187903848	-5.06159806327379	4.15756800446861e-07	6.27549146314202e-05
Contig76146	ref|XP_011878425.1| PREDICTED: cytochrome P450 4C1-like [Vollenhovia emeryi]	1.48466072992009	-30	5.90113711922263	-5.08376595796709	3.70023842706989e-07	6.27549146314202e-05
Contig76611	ref|XP_012229318.1| PREDICTED: high affinity cationic amino acid transporter 1-like isoform X2 [Linepithema humile]	0.261151152440426	-30	5.93179803754844	-5.05748843944099	4.24814172875092e-07	6.27549146314202e-05
Contig76654	#N/A	0.262700733857818	-30	5.93084667611718	-5.05829970631452	4.23011238688378e-07	6.27549146314202e-05
Contig76673	ref|XP_002733114.1| PREDICTED: basic leucine zipper and W2 domain-containing protein 1-like, partial [Saccoglossus kowalevskii]	0.567399679977742	-30	5.92891104081845	-5.05995110964908	4.19363992239159e-07	6.27549146314202e-05
Contig76911	ref|XP_002739055.1| PREDICTED: phosphotriesterase-related protein-like [Saccoglossus kowalevskii]	1.03326361459622	-30	5.91748374332071	-5.06972241940878	3.98396315096903e-07	6.27549146314202e-05
Contig76922	#N/A	0.264039925102669	-30	5.93319935036227	-5.05629395347524	4.27482261428344e-07	6.27549146314202e-05
Contig77236	#N/A	4.99407633490374	-30	5.9153764910732	-5.07152842177882	3.94633312307283e-07	6.27549146314202e-05
Contig78180	#N/A	0.269670300521356	-30	5.93357951222954	-5.05596999891344	4.28208651600013e-07	6.27549146314202e-05
Contig78223	#N/A	0.40643452202443	-30	5.9274693762636	-5.06118177854014	4.16665718463469e-07	6.27549146314202e-05
Contig78274	#N/A	0.813693304964175	-30	5.91805619672166	-5.06923202530903	3.99424067076438e-07	6.27549146314202e-05
Contig78324	ref|XP_011878118.1| PREDICTED: uncharacterized protein LOC105567668, partial [Vollenhovia emeryi]	11.5184520697078	-30	5.90478404623624	-5.08062611013221	3.76192896552659e-07	6.27549146314202e-05
Contig78347	ref|XP_011863695.1| PREDICTED: centrosomal protein of 152 kDa-like isoform X2 [Vollenhovia emeryi]	1.87823378410767	-30	5.90700728851722	-5.07871389600581	3.79998448782056e-07	6.27549146314202e-05
Contig78563	#N/A	0.234282020924477	-30	5.93485609462639	-5.05488246415325	4.30655905823927e-07	6.27549146314202e-05
Contig78584	#N/A	0.403176281924696	-30	5.93315017451276	-5.05633586165947	4.27388379292621e-07	6.27549146314202e-05
Contig78595	#N/A	0.259964801858997	-30	5.93303893110051	-5.05643066704694	4.27176070964919e-07	6.27549146314202e-05
Contig78610	#N/A	0.215861629869843	-30	5.93286964767136	-5.05657494291568	4.26853173075879e-07	6.27549146314202e-05
Contig78670	#N/A	0.344380414940012	-30	5.92257842735069	-5.06536137393451	4.07626325188138e-07	6.27549146314202e-05
Contig78735	#N/A	0.423763089717719	-30	5.92239265408241	-5.06552026389545	4.07286447511137e-07	6.27549146314202e-05
Contig78950	ref|XP_012060794.1| PREDICTED: ATP-binding cassette sub-family B member 7, mitochondrial [Atta cephalotes]	1.09097696486226	-30	5.91329003426588	-5.07331786977441	3.90938641681884e-07	6.27549146314202e-05
Contig79111	ref|XP_013298938.1| elongation factor 2 [Necator americanus]	0.383528243901545	-30	5.93009057814237	-5.05894464927341	4.21583206990981e-07	6.27549146314202e-05
Contig79147	#N/A	0.277230394085945	-30	5.93107110333047	-5.05810830410617	4.23435938409441e-07	6.27549146314202e-05
Contig79237	#N/A	0.226077608074499	-30	5.92975960208594	-5.05922701983513	4.20959447537195e-07	6.27549146314202e-05
Contig79255	#N/A	0.288561623900244	-30	5.92960330262409	-5.05936037689466	4.20665170081419e-07	6.27549146314202e-05
Contig79304	#N/A	0.327634903331936	-30	5.92960055124675	-5.05936272447429	4.20659991483192e-07	6.27549146314202e-05
Contig79319	#N/A	0.202634008222089	-30	5.93395593432094	-5.0556492720961	4.28928977320894e-07	6.27549146314202e-05
Contig79343	#N/A	0.352689812711733	-30	5.93071394249628	-5.05841291468068	4.2276023565969e-07	6.27549146314202e-05
Contig79349	#N/A	0.251742419442948	-30	5.93121141424862	-5.05798864763624	4.23701651445479e-07	6.27549146314202e-05
Contig79510	ref|XP_011692851.1| PREDICTED: ATPase family AAA domain-containing protein 2-like isoform X2 [Wasmannia auropunctata]	8.06668134250126	-30	5.88841760908576	-5.09474734837257	3.492066392304e-07	6.27549146314202e-05
Contig79629	#N/A	0.417421314090262	-30	5.9325485823516	-5.05684860116363	4.26241356596717e-07	6.27549146314202e-05
Contig79830	#N/A	0.622924207177218	-30	5.91683415798608	-5.07027900376561	3.97232935306377e-07	6.27549146314202e-05
Contig79986	#N/A	0.188569842196388	-30	5.93480255126374	-5.05492806894003	4.30553011933742e-07	6.27549146314202e-05
Contig80029	ref|XP_003493008.1| PREDICTED: putative GTPase Obg [Bombus impatiens]	0.540116787222311	-30	5.92865151902572	-5.0601726048034	4.18877117457231e-07	6.27549146314202e-05
Contig80072	#N/A	0.170607475148828	-30	5.93383501872133	-5.05575229263193	4.28697474429988e-07	6.27549146314202e-05
Contig80085	ref|XP_012527018.1| PREDICTED: uncharacterized protein LOC105831437 [Monomorium pharaonis]	0.333768453102554	-30	5.93287227049882	-5.05657270748518	4.26858174304499e-07	6.27549146314202e-05
Contig80232	#N/A	0.280219628971676	-30	5.93253006064846	-5.05686438893844	4.26206085766105e-07	6.27549146314202e-05
Contig80273	#N/A	0.331808199027668	-30	5.93054753355785	-5.05855485184897	4.22445738793982e-07	6.27549146314202e-05
Contig80274	ref|XP_012236001.1| PREDICTED: uncharacterized protein LOC105680119 [Linepithema humile]	0.452856808651616	-30	5.91908691242845	-5.06834929843795	4.01280508003416e-07	6.27549146314202e-05
Contig80275	#N/A	0.330427316779104	-30	5.9340258201883	-5.05558973099447	4.29062830268919e-07	6.27549146314202e-05
Contig80280	ref|XP_011859007.1| PREDICTED: uncharacterized protein LOC105556520 [Vollenhovia emeryi]	0.306894032156666	-30	5.93005922226264	-5.05897139903324	4.21524078283182e-07	6.27549146314202e-05
Contig80477	#N/A	0.196750701911684	-30	5.93389005754636	-5.05570539882987	4.28802837020189e-07	6.27549146314202e-05
Contig80953	ref|XP_011862229.1| PREDICTED: methyltransferase-like protein 16 homolog [Vollenhovia emeryi]	13.7085102885887	-30	5.88863481820746	-5.09455942271051	3.49553186473365e-07	6.27549146314202e-05
Contig81005	ref|XP_011162055.1| PREDICTED: PDZ domain-containing protein GIPC3 isoform X1 [Solenopsis invicta]	0.795230598776556	-30	5.92713391730476	-5.06146822706545	4.16040079949756e-07	6.27549146314202e-05
Contig81211	#N/A	0.278203763855384	-30	5.93379940518019	-5.05578263630046	4.28629310553149e-07	6.27549146314202e-05
Contig81253	#N/A	0.329271057433923	-30	5.92924250480042	-5.05966824188949	4.19986565816361e-07	6.27549146314202e-05
Contig81373	#N/A	0.300220756366652	-30	5.93144963298984	-5.05778550881465	4.24153116510749e-07	6.27549146314202e-05
Contig81585	#N/A	0.301005135262755	-30	5.93351071867524	-5.05602861819689	4.28077123776305e-07	6.27549146314202e-05
Contig8174	ref|XP_011703931.1| PREDICTED: protein FAN isoform X2 [Wasmannia auropunctata]	0.52011954907981	-30	5.92901480593039	-5.05986255422959	4.19558801163771e-07	6.27549146314202e-05
Contig81795	#N/A	1.05685101458511	-30	5.91508897921673	-5.07177493109707	3.94122351086027e-07	6.27549146314202e-05
Contig81873	ref|XP_011868878.1| PREDICTED: coiled-coil domain-containing protein 40 [Vollenhovia emeryi]	0.865510940693722	-30	5.9272442558591	-5.06137400535584	4.1624577155282e-07	6.27549146314202e-05
Contig81992	ref|XP_011702828.1| PREDICTED: probable E3 ubiquitin-protein ligase HERC3 [Wasmannia auropunctata]	0.387836448164694	-30	5.92952642393513	-5.05942597353171	4.20520491588661e-07	6.27549146314202e-05
Contig82015	ref|XP_006814954.1| PREDICTED: collagen alpha-1(II) chain [Saccoglossus kowalevskii]	0.212869334624674	-30	5.93136315169019	-5.05785925305404	4.23989170286274e-07	6.27549146314202e-05
Contig82035	#N/A	0.302875846064896	-30	5.93323432230923	-5.05626415043118	4.27549037901391e-07	6.27549146314202e-05
Contig82201	ref|XP_011860829.1| PREDICTED: protoheme IX farnesyltransferase, mitochondrial [Vollenhovia emeryi]	1.81219521815096	-30	5.92173461424911	-5.06608315877797	4.0608457151787e-07	6.27549146314202e-05
Contig82209	ref|XP_014610822.1| PREDICTED: cytochrome P450 4C1-like [Polistes canadensis]	0.358136336410919	-30	5.92463163968102	-5.06360594624499	4.11399578298887e-07	6.27549146314202e-05
Contig82258	ref|XP_011882433.1| PREDICTED: uncharacterized protein LOC105570082, partial [Vollenhovia emeryi]	0.302171805408448	-30	5.92805038080111	-5.06068573525616	4.17751285127695e-07	6.27549146314202e-05
Contig82300	ref|XP_003492999.1| PREDICTED: acetylornithine aminotransferase, mitochondrial-like [Bombus impatiens]	0.424757659035193	-30	5.93125765609096	-5.05794921405787	4.2378925416572e-07	6.27549146314202e-05
Contig82377	#N/A	0.295303241407331	-30	5.93030166517015	-5.05876457789593	4.21981452053869e-07	6.27549146314202e-05
Contig82382	#N/A	0.542675954637503	-30	5.92338740004379	-5.06466958412651	4.09109308307552e-07	6.27549146314202e-05
Contig82391	#N/A	0.32648040695267	-30	5.92962246781893	-5.05934402448303	4.20701244076467e-07	6.27549146314202e-05
Contig83020	ref|XP_015921374.1| PREDICTED: uncharacterized protein LOC107450151 [Parasteatoda tepidariorum]	0.594714939546637	-30	5.92857018378963	-5.06024202632001	4.18724632335473e-07	6.27549146314202e-05
Contig83115	ref|XP_012058965.1| PREDICTED: leukotriene A-4 hydrolase [Atta cephalotes]	0.225178072060826	-30	5.93146537700897	-5.05777208382323	4.24182969173216e-07	6.27549146314202e-05
Contig83125	ref|XP_011696169.1| PREDICTED: leukotriene A-4 hydrolase [Wasmannia auropunctata]	2.20731310078935	-30	5.92641198037239	-5.06208479926077	4.14696484754628e-07	6.27549146314202e-05
Contig83839	#N/A	0.292961229731	-30	5.9337482999669	-5.05582617991521	4.28531512646304e-07	6.27549146314202e-05
Contig84367	#N/A	0.370796644518117	-30	5.93339625594322	-5.05612615539546	4.27858359721557e-07	6.27549146314202e-05
Contig84679	ref|XP_012062374.1| PREDICTED: snRNA-activating protein complex subunit 1 [Atta cephalotes]	0.578561179762249	-30	5.9254036871833	-5.06294618624724	4.12826412637057e-07	6.27549146314202e-05
Contig85184	#N/A	0.170607475148828	-30	5.93383501872133	-5.05575229263193	4.28697474429988e-07	6.27549146314202e-05
Contig85246	#N/A	0.175460862213648	-30	5.93419587035392	-5.05544485814399	4.29388683846986e-07	6.27549146314202e-05
Contig85342	#N/A	0.306503507610844	-30	5.93189447224676	-5.05740621994531	4.24997308118255e-07	6.27549146314202e-05
Contig85366	#N/A	0.377506675990111	-30	5.92967794110063	-5.05929669334311	4.20805675057925e-07	6.27549146314202e-05
Contig85390	#N/A	0.117862895083212	-30	5.93678530204153	-5.05323983834882	4.34377867888887e-07	6.27549146314202e-05
Contig85532	#N/A	0.323883080826551	-30	5.9307106015945	-5.05841576419769	4.22753919629348e-07	6.27549146314202e-05
Contig85652	ref|XP_011064755.1| PREDICTED: putative protein MSS51 homolog, mitochondrial [Acromyrmex echinatior]	0.243131247566512	-30	5.93117571961903	-5.05801908730618	4.23634040875282e-07	6.27549146314202e-05
Contig85708	ref|XP_011699846.1| PREDICTED: uncharacterized protein LOC105457091 [Wasmannia auropunctata]	0.538394518765773	-30	5.9289173477093	-5.0599457271218	4.19375830517698e-07	6.27549146314202e-05
Contig85754	ref|XP_012528039.1| PREDICTED: intraflagellar transport protein 80 homolog [Monomorium pharaonis]	1.70002193117463	-30	5.91664088511948	-5.07044462939281	3.96887375841254e-07	6.27549146314202e-05
Contig85965	#N/A	0.396510399778352	-30	5.93099954752834	-5.05816932872673	4.2330048706901e-07	6.27549146314202e-05
Contig86107	#N/A	0.381909708502844	-30	5.92929491365566	-5.05962351963764	4.20085078190893e-07	6.27549146314202e-05
Contig86108	#N/A	0.36901596030953	-30	5.92812947736551	-5.06061821263259	4.17899265954243e-07	6.27549146314202e-05
Contig86120	#N/A	0.251388363525158	-30	5.93151186738029	-5.05773244170374	4.24271131735386e-07	6.27549146314202e-05
Contig86126	ref|XP_003494833.1| PREDICTED: peroxiredoxin-2-like [Bombus impatiens]	0.36640025997714	-30	5.93021245195656	-5.05884068118033	4.21813098103269e-07	6.27549146314202e-05
Contig86373	ref|XP_011880603.1| PREDICTED: GPI ethanolamine phosphate transferase 1-like [Vollenhovia emeryi]	0.518927199799546	-30	5.9283962760173	-5.06039046704112	4.18398760336264e-07	6.27549146314202e-05
Contig86407	ref|XP_011695782.1| PREDICTED: WD repeat-containing protein 43 [Wasmannia auropunctata]	1.57669104604426	-30	5.90115502312015	-5.08375053399935	3.70053907141644e-07	6.27549146314202e-05
Contig86689	ref|XP_011064087.1| PREDICTED: mannose-6-phosphate isomerase isoform X2 [Acromyrmex echinatior]	0.306502830092522	-30	5.92988839032048	-5.05911714105275	4.21202064988349e-07	6.27549146314202e-05
Contig86926	#N/A	0.483106825505035	-30	5.92055238448242	-5.06709476612842	4.03933214311031e-07	6.27549146314202e-05
Contig87122	ref|XP_012056273.1| PREDICTED: protein zyg-11 homolog B-like [Atta cephalotes]	1.03317314089635	-30	5.92252967467467	-5.06540307063095	4.07537106316589e-07	6.27549146314202e-05
Contig87368	ref|XP_011882673.1| PREDICTED: protein maelstrom 2-like [Vollenhovia emeryi]	1.83521037177209	-30	5.91423987591356	-5.07250308229441	3.92616774202231e-07	6.27549146314202e-05
Contig87479	#N/A	0.162359451953328	-30	5.93504554337757	-5.05472111051861	4.31020143686198e-07	6.27549146314202e-05
Contig87553	ref|XP_011873544.1| PREDICTED: hybrid signal transduction histidine kinase L isoform X1 [Vollenhovia emeryi]	3.60846013109673	-30	5.92067618633764	-5.06698881273511	4.04158025812675e-07	6.27549146314202e-05
Contig87693	#N/A	0.318696258563952	-30	5.92891910653507	-5.05994422607873	4.19379131954828e-07	6.27549146314202e-05
Contig87878	#N/A	0.478437599264527	-30	5.92201219541437	-5.06584569738476	4.06591173943353e-07	6.27549146314202e-05
Contig87976	ref|XP_011067635.1| PREDICTED: ras GTPase-activating protein 1 [Acromyrmex echinatior]	1.51674969140803	-30	5.89443121440819	-5.0895495949921	3.58914983306966e-07	6.27549146314202e-05
Contig88012	ref|XP_017067260.1| PREDICTED: ferrous iron transport protein B homolog [Drosophila eugracilis]	0.350907931319421	-30	5.93065079306972	-5.05846677653936	4.22640864817463e-07	6.27549146314202e-05
Contig88036	#N/A	0.690263924403134	-30	5.92486233485849	-5.06340878563494	4.11825469747682e-07	6.27549146314202e-05
Contig88361	ref|XP_004205890.1| PREDICTED: peptidyl-prolyl cis-trans isomerase FKBP2-like [Hydra vulgaris]	0.502692697747364	-30	5.93012098419048	-5.05891871008687	4.21640551618199e-07	6.27549146314202e-05
Contig88678	ref|XP_013171214.1| PREDICTED: UPF0073 membrane protein Mb1114c-like [Papilio xuthus]	0.598939152446074	-30	5.92659938650401	-5.0619247301101	4.15044894433775e-07	6.27549146314202e-05
Contig88888	#N/A	0.31162738660171	-30	5.9304716451631	-5.05861958289068	4.22302386132657e-07	6.27549146314202e-05
Contig88903	#N/A	0.373374092286378	-30	5.93014539288326	-5.05889788739461	4.21686590485654e-07	6.27549146314202e-05
Contig88950	ref|XP_002740964.1| PREDICTED: ADP-ribosylation factor 1-like isoform X3 [Saccoglossus kowalevskii]	0.359949337094194	-30	5.93352209143073	-5.05601892732925	4.28098865104451e-07	6.27549146314202e-05
Contig89073	ref|XP_011872159.1| PREDICTED: Golgi apparatus protein 1 [Vollenhovia emeryi]	0.514909507641014	-30	5.91597851907007	-5.07101232759643	3.95705136303893e-07	6.27549146314202e-05
Contig89319	ref|XP_011698500.1| PREDICTED: chaoptin isoform X1 [Wasmannia auropunctata]	1.12361198271319	-30	5.92688907575061	-5.06167731782641	4.15583972596577e-07	6.27549146314202e-05
Contig89878	ref|XP_011565865.1| PREDICTED: uncharacterized hydrolase C215.10-like [Plutella xylostella]	0.355051735893428	-30	5.93068081726261	-5.05844116794789	4.22697615563994e-07	6.27549146314202e-05
Contig89977	#N/A	0.356826743576475	-30	5.92805533315022	-5.06068150751517	4.17760549051094e-07	6.27549146314202e-05
Contig90286	ref|XP_013411172.1| PREDICTED: ATP-binding cassette sub-family A member 3-like isoform X2 [Lingula anatina]	0.528583425220414	-30	5.9284896053999	-5.06031080372897	4.1857361481724e-07	6.27549146314202e-05
Contig90389	#N/A	0.253476779435189	-30	5.93120500770596	-5.05799411098138	4.23689515860128e-07	6.27549146314202e-05
Contig90462	#N/A	0.337484788501522	-30	5.93074307534274	-5.05838806687243	4.22815315346795e-07	6.27549146314202e-05
Contig90485	#N/A	0.320642144624571	-30	5.92962385839837	-5.05934283799634	4.20703861623961e-07	6.27549146314202e-05
Contig90523	ref|XP_002164071.1| PREDICTED: 60S ribosomal protein L6-like [Hydra vulgaris]	0.370873264032234	-30	5.9304078107698	-5.05867403343141	4.22181836901891e-07	6.27549146314202e-05
Contig9059	ref|XP_011672718.1| PREDICTED: NADPH oxidase 5-like, partial [Strongylocentrotus purpuratus]	0.566354872248285	-30	5.92878609227855	-5.0600577475836	4.1912952025384e-07	6.27549146314202e-05
Contig90848	#N/A	0.457464144790039	-30	5.92474280120911	-5.06351094158512	4.11604747107867e-07	6.27549146314202e-05
Contig90863	#N/A	0.359424275851805	-30	5.93047775748427	-5.05861436916106	4.2231393066354e-07	6.27549146314202e-05
Contig90877	#N/A	0.538291314863287	-30	5.92879434697136	-5.06005070243751	4.19145006986615e-07	6.27549146314202e-05
Contig90901	#N/A	0.262641737470769	-30	5.9310710516109	-5.05810834821342	4.23435840493107e-07	6.27549146314202e-05
Contig90917	#N/A	0.250839565084784	-30	5.93215709618966	-5.05718232230727	4.25496402669203e-07	6.27549146314202e-05
Contig90940	#N/A	0.312973652123318	-30	5.93318443021095	-5.05630666851416	4.27453775271421e-07	6.27549146314202e-05
Contig90994	#N/A	0.21774538518112	-30	5.93355754814354	-5.05598871445786	4.28166654103525e-07	6.27549146314202e-05
Contig91000	#N/A	0.345917306932779	-30	5.92509444378806	-5.0632104322746	4.1225436693599e-07	6.27549146314202e-05
Contig91170	#N/A	0.206923070403432	-30	5.93206452909145	-5.057261237277	4.25320427291311e-07	6.27549146314202e-05
Contig91247	#N/A	0.552567658848881	-30	5.92566839285421	-5.06272001926013	4.13316632187105e-07	6.27549146314202e-05
Contig91256	ref|XP_013081754.1| PREDICTED: arginine--tRNA ligase, cytoplasmic-like [Biomphalaria glabrata]	0.397090661436986	-30	5.92812846797136	-5.06061907431405	4.17897377196991e-07	6.27549146314202e-05
Contig91347	ref|XP_015782460.1| PREDICTED: ubiquitin carboxyl-terminal hydrolase 10-like isoform X1 [Tetranychus urticae]	0.325317004068566	-30	5.93073576029894	-5.05839430595165	4.2280148464181e-07	6.27549146314202e-05
Contig91376	#N/A	0.173111689439961	-30	5.93400637807257	-5.05560629507519	4.29025588903768e-07	6.27549146314202e-05
Contig92022	ref|XP_011689403.1| PREDICTED: ecto-NOX disulfide-thiol exchanger 2 [Wasmannia auropunctata]	5.15642757437452	-30	5.91629244244506	-5.07074325548412	3.96265058540376e-07	6.27549146314202e-05
Contig92121	ref|XP_011680090.1| PREDICTED: glycerol-3-phosphate dehydrogenase, mitochondrial isoform X2 [Strongylocentrotus purpuratus]	2.17894805740724	-30	5.90443336258453	-5.08092786517083	3.75595735135023e-07	6.27549146314202e-05
Contig92156	#N/A	0.190723063213512	-30	5.93355198062015	-5.05599345855306	4.28156009032187e-07	6.27549146314202e-05
Contig92310	#N/A	0.769291938472075	-30	5.92803769251718	-5.06069656707283	4.1772755110601e-07	6.27549146314202e-05
Contig92398	ref|XP_001600882.1| PREDICTED: probable small nuclear ribonucleoprotein E [Nasonia vitripennis]	0.315346816469408	-30	5.93353082830322	-5.05601148255582	4.28115568074684e-07	6.27549146314202e-05
Contig92420	ref|XP_012249056.1| PREDICTED: uncharacterized protein LOC105681983 [Bombus impatiens]	0.377506675990111	-30	5.92967794110063	-5.05929669334311	4.20805675057925e-07	6.27549146314202e-05
Contig92656	ref|XP_013413968.1| PREDICTED: LOW QUALITY PROTEIN: catalase-like [Lingula anatina]	4.84734347683612	-30	5.90060116540641	-5.08422771833516	3.6912486919195e-07	6.27549146314202e-05
Contig92714	#N/A	0.281814776697213	-30	5.93146560203347	-5.0577718919444	4.24183395861833e-07	6.27549146314202e-05
Contig92864	#N/A	0.298536037960629	-30	5.92772068272905	-5.06096720910074	4.17134958831664e-07	6.27549146314202e-05
Contig93081	ref|XP_011158259.1| PREDICTED: astacin-like isoform X1 [Solenopsis invicta]	0.117862895083212	-30	5.93678530204153	-5.05323983834882	4.34377867888887e-07	6.27549146314202e-05
Contig93184	#N/A	0.210496995322772	-30	5.93193778134535	-5.05736929580473	4.25079577523628e-07	6.27549146314202e-05
Contig93297	#N/A	0.271893044220772	-30	5.93184438350933	-5.05744892489101	4.24902177857356e-07	6.27549146314202e-05
Contig93306	ref|XP_009059575.1| hypothetical protein LOTGIDRAFT_124623, partial [Lottia gigantea]	0.15306355788138	-30	5.93569057106482	-5.05417181721759	4.32262341513015e-07	6.27549146314202e-05
Contig93330	ref|XP_011690209.1| PREDICTED: myotubularin-related protein 6 [Wasmannia auropunctata]	0.303352665503688	-30	5.92712846519731	-5.06147288288973	4.16029918551204e-07	6.27549146314202e-05
Contig93337	#N/A	0.117862895083212	-30	5.93678530204153	-5.05323983834882	4.34377867888887e-07	6.27549146314202e-05
Contig93558	#N/A	0.346460688448436	-30	5.93070163825355	-5.05842340921306	4.22736974698962e-07	6.27549146314202e-05
Contig93562	ref|XP_012536977.1| PREDICTED: BRCA1-A complex subunit BRE-like [Monomorium pharaonis]	6.66974275539195	-30	5.90980352412219	-5.07631089215542	3.84833436896826e-07	6.27549146314202e-05
Contig95060	#N/A	0.257698771666699	-30	5.93426119011784	-5.05538921171151	4.29513909392972e-07	6.27549146314202e-05
Contig95394	#N/A	0.352014443742729	-30	5.93113026455301	-5.05805785101247	4.23547956576632e-07	6.27549146314202e-05
Contig95648	#N/A	0.190874283577989	-30	5.9318140165035	-5.05747481571977	4.24844513011796e-07	6.27549146314202e-05
Contig95765	#N/A	0.331825517795139	-30	5.93049683954843	-5.05859809248028	4.22349973356913e-07	6.27549146314202e-05
Contig95774	ref|YP_009019283.1| cytochrome b (mitochondrion) [Strongylocentrotus intermedius]	0.286489619164013	-30	5.9300925540437	-5.05894296363775	4.21586933253505e-07	6.27549146314202e-05
Contig95980	#N/A	0.207794808959374	-30	5.93322709967281	-5.05627030552301	4.27535246025119e-07	6.27549146314202e-05
Contig95983	#N/A	0.364687121878127	-30	5.92892398546191	-5.05994006223758	4.19388290157617e-07	6.27549146314202e-05
Contig96231	ref|XP_012279541.1| PREDICTED: carboxyl-terminal PDZ ligand of neuronal nitric oxide synthase protein isoform X1 [Orussus abietinus]	0.347804122429397	-30	5.92735936919432	-5.06127571004317	4.16460460645237e-07	6.27549146314202e-05
Contig96279	#N/A	0.920314994481485	-30	5.91840899356536	-5.0689298479738	4.00058633885707e-07	6.27549146314202e-05
Contig96419	#N/A	0.391252414602234	-30	5.93048553356362	-5.05860773628311	4.22328617991874e-07	6.27549146314202e-05
Contig96487	#N/A	0.212995371979717	-30	5.93420342936923	-5.05543841849534	4.29403173692685e-07	6.27549146314202e-05
Contig96490	#N/A	0.223411381768079	-30	5.93284943143324	-5.05659217324055	4.26814626338186e-07	6.27549146314202e-05
Contig96522	#N/A	0.184897197081676	-30	5.93392508438657	-5.05567555595477	4.28869902015321e-07	6.27549146314202e-05
Contig96554	ref|XP_015765263.1| PREDICTED: omega-6 fatty acid desaturase, endoplasmic reticulum isozyme 1-like [Acropora digitifera]	0.7305085611027	-30	5.928482905838	-5.0603165222013	4.18561060887835e-07	6.27549146314202e-05
Contig96693	#N/A	0.313676329831322	-30	5.92877208739226	-5.06006970040155	4.19103246675146e-07	6.27549146314202e-05
Contig96899	#N/A	0.319901241037472	-30	5.93050089827832	-5.05859463046524	4.22357639943124e-07	6.27549146314202e-05
Contig96919	ref|XP_015584961.1| PREDICTED: metastasis-associated protein MTA3 isoform X3 [Cephus cinctus]	0.496588604885271	-30	5.92269544470128	-5.06526129531773	4.07840541391743e-07	6.27549146314202e-05
Contig96971	ref|XP_013074212.1| PREDICTED: ubiquitin-conjugating enzyme E2 variant 1-like [Biomphalaria glabrata]	0.425062017745729	-30	5.92915680674733	-5.05974137264513	4.19825524355203e-07	6.27549146314202e-05
Contig97239	ref|XP_011860781.1| PREDICTED: rho guanine nucleotide exchange factor 18-like isoform X9 [Vollenhovia emeryi]	3.63400556411146	-30	5.92637854102705	-5.06211336186448	4.14634344502882e-07	6.27549146314202e-05
Contig97509	#N/A	2.32621824197955	-30	5.91774047171143	-5.06950248044993	3.98856940025061e-07	6.27549146314202e-05
Contig97711	ref|XP_012535840.1| PREDICTED: histone acetyltransferase p300-like [Monomorium pharaonis]	0.321558232796759	-30	5.93294390772156	-5.05651165199048	4.26994792890755e-07	6.27549146314202e-05
Contig98165	#N/A	0.455407379994609	-30	5.93106064381354	-5.05811722415818	4.23416136693135e-07	6.27549146314202e-05
Contig98204	ref|XP_011705105.1| PREDICTED: UPF0676 protein C1494.01-like [Wasmannia auropunctata]	0.263011585864233	-30	5.93142038204571	-5.05781045140712	4.24097657961284e-07	6.27549146314202e-05
Contig98314	#N/A	0.445961462625087	-30	5.93080912318973	-5.05833173465297	4.22940211600059e-07	6.27549146314202e-05
Contig98841	#N/A	0.974311492945296	-30	5.92363576902155	-5.06445723028567	4.09565572468784e-07	6.27549146314202e-05
Contig99202	ref|XP_012793367.1| putative elongation factor 1-gamma [Schistosoma haematobium]	1.25765823949053	-30	5.92528171410459	-5.06305040798106	4.12600699695064e-07	6.27549146314202e-05
Contig100083	#N/A	0.242706620188233	30	5.93124693522457	5.05795835641838	4.23768942618103e-07	6.27549146314202e-05
Contig100109	ref|XP_011865116.1| PREDICTED: chromatin assembly factor 1 subunit B [Vollenhovia emeryi]	2.98274169077905	30	5.90607032181	5.07951960700767	3.78390472808093e-07	6.27549146314202e-05
Contig100440	#N/A	0.224030027155069	30	5.93160611753437	5.0576520769505	4.24449914131908e-07	6.27549146314202e-05
Contig100827	#N/A	0.283157308136689	30	5.93348385905559	5.05605150576326	4.28025780065011e-07	6.27549146314202e-05
Contig100995	ref|XP_011873844.1| PREDICTED: putative nuclease HARBI1 isoform X2 [Vollenhovia emeryi]	0.195378322694671	30	5.93206533490511	5.057260550297	4.25321958910125e-07	6.27549146314202e-05
Contig101069	ref|XP_012536011.1| PREDICTED: uncharacterized protein LOC105836495 isoform X2 [Monomorium pharaonis]	0.721133511848322	30	5.91796275920492	5.06931206238792	3.99256153453494e-07	6.27549146314202e-05
Contig101297	ref|XP_011876124.1| PREDICTED: lachesin-like isoform X3 [Vollenhovia emeryi]	1.04181619306154	30	5.91075150087448	5.07549674445991	3.86484974306615e-07	6.27549146314202e-05
Contig101687	#N/A	0.290777573866284	30	5.92587679000225	5.06254197701411	4.13702935863102e-07	6.27549146314202e-05
Contig101757	#N/A	0.447424076476355	30	5.92590815978651	5.06251517760289	4.13761113516909e-07	6.27549146314202e-05
Contig102274	ref|XP_014207300.1| PREDICTED: uncharacterized protein LOC106638560 [Copidosoma floridanum]	0.538361195499286	30	5.92879095868423	5.06005359424207	4.1913865011702e-07	6.27549146314202e-05
Contig102567	#N/A	0.355678739520091	30	5.92962025615563	5.05934591154577	4.20697080997361e-07	6.27549146314202e-05
Contig102597	#N/A	0.295344160577519	30	5.930720211714	5.05840756755744	4.22772087946467e-07	6.27549146314202e-05
Contig102842	ref|XP_011054017.1| PREDICTED: aldehyde dehydrogenase, dimeric NADP-preferring isoform X6 [Acromyrmex echinatior]	25.8165994156172	30	5.90331114059124	5.08189375174885	3.73690427655223e-07	6.27549146314202e-05
Contig102912	ref|XP_011878979.1| PREDICTED: intraflagellar transport protein 88 homolog [Vollenhovia emeryi]	0.410077944175845	30	5.92978359459212	5.0592065496892	4.21004636347511e-07	6.27549146314202e-05
Contig102984	ref|XP_011874599.1| PREDICTED: protein timeless homolog isoform X2 [Vollenhovia emeryi]	0.976515876728007	30	5.92936376250971	5.05956476977927	4.20214523891967e-07	6.27549146314202e-05
Contig103021	#N/A	0.231240944755992	30	5.93107845171539	5.0581020372987	4.23449850694909e-07	6.27549146314202e-05
Contig103345	#N/A	0.528363640430481	30	5.9230170027249	5.06498630447935	4.08429713008525e-07	6.27549146314202e-05
Contig103375	ref|XP_011863786.1| PREDICTED: saccharopine dehydrogenase-like oxidoreductase [Vollenhovia emeryi]	2.31240046271096	30	5.91308807291085	5.07349114880203	3.90582650574795e-07	6.27549146314202e-05
Contig103438	#N/A	0.214022968765132	30	5.93429652122605	5.05535911336663	4.29581656748587e-07	6.27549146314202e-05
Contig103534	#N/A	0.477596668617768	30	5.92054014340953	5.06710524265165	4.03910991820801e-07	6.27549146314202e-05
Contig103545	ref|XP_011633602.1| PREDICTED: zinc finger protein 239-like [Pogonomyrmex barbatus]	0.373900203955473	30	5.930107415841	5.05893028511785	4.21614961380332e-07	6.27549146314202e-05
Contig105033	ref|XP_011057618.1| PREDICTED: nuclear pore complex protein Nup155 isoform X1 [Acromyrmex echinatior]	0.252546250825659	30	5.93447255912184	5.05520915315165	4.29919350836315e-07	6.27549146314202e-05
Contig10547	#N/A	0.689834511101527	30	5.92369285886898	5.06440842135896	4.09670512861929e-07	6.27549146314202e-05
Contig105620	ref|XP_011861289.1| PREDICTED: neprilysin-like isoform X2 [Vollenhovia emeryi]	13.5850412921746	30	5.90822901415257	5.07766370060098	3.82104249651942e-07	6.27549146314202e-05
Contig105707	ref|XP_017101086.1| PREDICTED: protein unc-13 homolog A-like, partial [Drosophila bipectinata]	0.298818161472602	30	5.92706362385656	5.06152825477516	4.15909087030317e-07	6.27549146314202e-05
Contig105738	#N/A	0.334758066594734	30	5.9218812588314	5.06595770647385	4.06352136737707e-07	6.27549146314202e-05
Contig106117	#N/A	0.348182328723463	30	5.92998414479115	5.0590354489146	4.21382532451466e-07	6.27549146314202e-05
Contig106434	#N/A	0.26813345815476	30	5.92974149517123	5.05924246856796	4.2092534683113e-07	6.27549146314202e-05
Contig107085	#N/A	0.16538847921927	30	5.93345013926734	5.05608023929639	4.27961330499038e-07	6.27549146314202e-05
Contig107129	#N/A	0.236840568933957	30	5.93178208192918	5.05750204333926	4.24783878970129e-07	6.27549146314202e-05
Contig107143	#N/A	0.414320983657192	30	5.9208287884895	5.06685821726885	4.0443528888386e-07	6.27549146314202e-05
Contig107189	ref|XP_011877260.1| PREDICTED: LOW QUALITY PROTEIN: uncharacterized aarF domain-containing protein kinase 5 [Vollenhovia emeryi]	1.16512232422483	30	5.93267302204002	5.05674253216877	4.26478394081572e-07	6.27549146314202e-05
Contig107198	ref|XP_011632330.1| PREDICTED: LOW QUALITY PROTEIN: serine/threonine-protein kinase minibrain [Pogonomyrmex barbatus]	6.32371256216225	30	5.88954795380406	5.09376954484647	3.51013406331411e-07	6.27549146314202e-05
Contig107437	ref|XP_011860942.1| PREDICTED: exonuclease 1 isoform X2 [Vollenhovia emeryi]	0.465189309788457	30	5.92823977020573	5.06052406158985	4.18105689360131e-07	6.27549146314202e-05
Contig108060	#N/A	0.254856367494147	30	5.93079149739946	5.05834676756963	4.22906878081422e-07	6.27549146314202e-05
Contig108122	#N/A	0.31927432245009	30	5.92690455377828	5.06166409932747	4.15612792934272e-07	6.27549146314202e-05
Contig109017	ref|XP_011862155.1| PREDICTED: dynein heavy chain 2, axonemal [Vollenhovia emeryi]	0.646443004394226	30	5.92976455424271	5.05922279469514	4.20968774349241e-07	6.27549146314202e-05
Contig109118	ref|XP_011882433.1| PREDICTED: uncharacterized protein LOC105570082, partial [Vollenhovia emeryi]	0.264793489228175	30	5.92918011283157	5.05972148410129	4.19869315079543e-07	6.27549146314202e-05
Contig109535	ref|XP_011872803.1| PREDICTED: structural maintenance of chromosomes protein 1A-like [Vollenhovia emeryi]	1.05829917592578	30	5.92266656333514	5.06528599562198	4.07787660809006e-07	6.27549146314202e-05
Contig110219	ref|XP_011866791.1| PREDICTED: protein virilizer isoform X3 [Vollenhovia emeryi]	1.02063238703453	30	5.91581294464374	5.07115425736414	3.95410096968406e-07	6.27549146314202e-05
Contig110440	ref|XP_011158109.1| PREDICTED: LOW QUALITY PROTEIN: uncharacterized protein LOC105194736 [Solenopsis invicta]	4.37971617440398	30	5.90943536094726	5.07662715092142	3.84193729292667e-07	6.27549146314202e-05
Contig110585	ref|XP_008550978.1| PREDICTED: brahma-associated protein of 60 kDa isoform X1 [Microplitis demolitor]	3.7586937770285	30	5.20616188143781	5.76240245370832	8.29249714891322e-09	2.92926242412498e-05
Contig110660	#N/A	0.220691483186565	30	5.9314852349709	5.05775515095709	4.24220625059198e-07	6.27549146314202e-05
Contig110832	ref|XP_011175544.1| PREDICTED: quinone oxidoreductase-like protein 2 homolog [Solenopsis invicta]	0.833040829781057	30	5.92767648259318	5.06100494655806	4.17052394123202e-07	6.27549146314202e-05
Contig111203	ref|XP_011639234.1| PREDICTED: kinesin-like protein KIF16B isoform X5 [Pogonomyrmex barbatus]	5.33308249213531	30	5.89087703333076	5.09262030598485	3.53148484304756e-07	6.27549146314202e-05
Contig111218	#N/A	0.229515434768816	30	5.93181241794526	5.05747617865364	4.24841477652996e-07	6.27549146314202e-05
Contig111960	#N/A	0.235767662422754	30	5.93325791993176	5.05624404076893	4.27594101143121e-07	6.27549146314202e-05
Contig113057	ref|XP_011861139.1| PREDICTED: actin-interacting protein 1 isoform X2 [Vollenhovia emeryi]	2.8381519666053	30	5.92643404426717	5.06206595330626	4.14737490571189e-07	6.27549146314202e-05
Contig113695	ref|XP_011697057.1| PREDICTED: eukaryotic translation initiation factor 2-alpha kinase isoform X1 [Wasmannia auropunctata]	0.251184386256823	30	5.93081086411531	5.05833024983423	4.22943504128186e-07	6.27549146314202e-05
Contig114141	ref|XP_011635727.1| PREDICTED: protein spinster isoform X1 [Pogonomyrmex barbatus]	0.376642132302227	30	5.93021693235602	5.05883685912335	4.2182155162485e-07	6.27549146314202e-05
Contig114756	#N/A	0.23006742576325	30	5.9319396112884	5.05736773565773	4.25083053971693e-07	6.27549146314202e-05
Contig115903	ref|XP_016842656.1| PREDICTED: uncharacterized protein LOC107981383 [Nasonia vitripennis]	0.233333100572219	30	5.93153446733457	5.0577131710542	4.24313995310557e-07	6.27549146314202e-05
Contig116507	#N/A	0.218234714596979	30	5.9321467297945	5.05719115970674	4.25476692336635e-07	6.27549146314202e-05
Contig116547	#N/A	0.293752981786901	30	5.93105635552123	5.05812088129511	4.23408018435046e-07	6.27549146314202e-05
Contig116891	#N/A	0.203761793127067	30	5.93175421091296	5.05752580658305	4.24730966678706e-07	6.27549146314202e-05
Contig117575	ref|XP_012058965.1| PREDICTED: leukotriene A-4 hydrolase [Atta cephalotes]	0.350569313327708	30	5.93270082709106	5.05671883251017	4.26531374228244e-07	6.27549146314202e-05
Contig118561	ref|XP_012543251.1| PREDICTED: LOW QUALITY PROTEIN: dynein heavy chain 8, axonemal-like [Monomorium pharaonis]	0.290380409490194	30	5.93361500272177	5.05593975784389	4.28276520659937e-07	6.27549146314202e-05
Contig118731	#N/A	0.405535453643399	30	5.92156809895126	5.06622561772331	4.05780940581515e-07	6.27549146314202e-05
Contig118934	ref|XP_011695198.1| PREDICTED: actin-related protein 5 [Wasmannia auropunctata]	0.194679343996513	30	5.93180410826171	5.05748326351784	4.24825699451325e-07	6.27549146314202e-05
Contig119322	#N/A	0.233277926754364	30	5.93324639060039	5.05625386593195	4.27572083607346e-07	6.27549146314202e-05
Contig119387	#N/A	0.303903082571309	30	5.92963450457883	5.05933375435437	4.20723901867283e-07	6.27549146314202e-05
Contig119485	#N/A	0.342623956218157	30	5.92967743759012	5.05929712294642	4.20804727072764e-07	6.27549146314202e-05
Contig119915	ref|XP_011170369.1| PREDICTED: uncharacterized protein LOC105203292 [Solenopsis invicta]	0.724072736086167	30	5.92790081204719	5.06081342303019	4.17471586109675e-07	6.27549146314202e-05
Contig120166	#N/A	0.258932123556391	30	5.93090248924187	5.05825210487229	4.23116822461815e-07	6.27549146314202e-05
Contig120457	ref|XP_011704965.1| PREDICTED: LOW QUALITY PROTEIN: cardioacceleratory peptide receptor, partial [Wasmannia auropunctata]	0.323095812230212	30	5.9296840781359	5.05929145713122	4.20817229722908e-07	6.27549146314202e-05
Contig120741	#N/A	0.452746249141311	30	5.92556620783342	5.06280732469767	4.13127330123287e-07	6.27549146314202e-05
Contig121052	ref|XP_011865402.1| PREDICTED: probable cation-transporting ATPase 13A3 [Vollenhovia emeryi]	4.80361393434969	30	5.90053471837326	5.08428497278139	3.69013550941748e-07	6.27549146314202e-05
Contig121154	ref|XP_011706539.1| PREDICTED: ER degradation-enhancing alpha-mannosidase-like protein 3, partial [Wasmannia auropunctata]	0.49097782733793	30	5.930927514915	5.05823076147137	4.23164172073046e-07	6.27549146314202e-05
Contig121666	#N/A	0.318143691507884	30	5.93115929848771	5.0580330910433	4.23602940201716e-07	6.27549146314202e-05
Contig122011	#N/A	0.252864342034585	30	5.93321979536834	5.05627653022714	4.27521298603247e-07	6.27549146314202e-05
Contig122370	ref|XP_011879066.1| PREDICTED: aminopeptidase N-like isoform X1 [Vollenhovia emeryi]	0.18755081422347	30	5.93325949586686	5.05624269777821	4.27597110780831e-07	6.27549146314202e-05
Contig122550	#N/A	0.402608120413657	30	5.92921494456301	5.05969176029105	4.19934769371807e-07	6.27549146314202e-05
Contig122556	#N/A	0.399571515026813	30	5.91860966907024	5.06875798158738	4.00419983977332e-07	6.27549146314202e-05
Contig122673	ref|XP_011861509.1| PREDICTED: putative helicase mov-10-B.1 isoform X2 [Vollenhovia emeryi]	0.442466892347631	30	5.92543470388944	5.06291968423989	4.12883827013451e-07	6.27549146314202e-05
Contig123110	ref|XP_011861118.1| PREDICTED: uncharacterized protein LOC105558172 [Vollenhovia emeryi]	3.49751348145097	30	5.02078484682497	5.97516143695569	2.29862442124892e-09	9.84208287421844e-06
Contig124407	#N/A	0.269732107263851	30	5.9308398511022	5.05830552723907	4.22998329160549e-07	6.27549146314202e-05
Contig124458	#N/A	0.404832739958351	30	5.92953771972034	5.0594163353117	4.20541746424576e-07	6.27549146314202e-05
Contig124754	#N/A	0.312855233137636	30	5.93030777140907	5.05875936905579	4.2199297730135e-07	6.27549146314202e-05
Contig124855	ref|XP_011157661.1| PREDICTED: ras-related and estrogen-regulated growth inhibitor [Solenopsis invicta]	2.03036218914004	30	5.90654225194145	5.07911375562228	3.79199617252304e-07	6.27549146314202e-05
Contig125790	ref|XP_011695977.1| PREDICTED: zinc finger SWIM domain-containing protein 8 [Wasmannia auropunctata]	15.2909777010885	30	5.88846668682736	5.09470488592739	3.49284913751204e-07	6.27549146314202e-05
Contig126107	#N/A	0.638548921240791	30	5.91832788546171	5.06899931544763	3.99912667423328e-07	6.27549146314202e-05
Contig126343	#N/A	0.466159641164221	30	5.9229711066831	5.06502555215066	4.08345574126358e-07	6.27549146314202e-05
Contig126887	ref|XP_012056430.1| PREDICTED: cyclin-Y [Atta cephalotes]	0.501857918994888	30	5.92820079611548	5.06055733126614	4.18032735331604e-07	6.27549146314202e-05
Contig127259	ref|XP_011059565.1| PREDICTED: slowpoke-binding protein isoform X2 [Acromyrmex echinatior]	0.561001613219649	30	5.92768692353126	5.06099603218051	4.1707189621355e-07	6.27549146314202e-05
Contig128494	#N/A	0.524250137294392	30	5.92851147346265	5.06029213813395	4.18614594471579e-07	6.27549146314202e-05
Contig128660	ref|XP_011685218.1| PREDICTED: tachykinin-like peptides receptor 86C [Wasmannia auropunctata]	0.286969634520519	30	5.92667229388523	5.06186246048261	4.15180508026387e-07	6.27549146314202e-05
Contig128687	#N/A	0.242354526329165	30	5.93212160184866	5.05721258152411	4.25428918232814e-07	6.27549146314202e-05
Contig129165	ref|XP_012533032.1| PREDICTED: regulating synaptic membrane exocytosis protein 2 isoform X2 [Monomorium pharaonis]	0.831768494698488	30	5.91826179977546	5.06905591792817	3.99793771141805e-07	6.27549146314202e-05
Contig129299	ref|XP_011702302.1| PREDICTED: tubulin polyglutamylase complex subunit 2 isoform X1 [Wasmannia auropunctata]	0.317707816448416	30	5.93045850854502	5.05863078828962	4.22277575543804e-07	6.27549146314202e-05
Contig129308	#N/A	0.165410784641524	30	5.9335937013733	5.05595790845212	4.28235784588536e-07	6.27549146314202e-05
Contig129535	#N/A	0.262321473348922	30	5.93098642503771	5.05818052008259	4.23275651071725e-07	6.27549146314202e-05
Contig130050	ref|XP_011871373.1| PREDICTED: uncharacterized protein LOC105563955, partial [Vollenhovia emeryi]	0.393902068562685	30	5.93307919262297	5.05639635440923	4.27252899348025e-07	6.27549146314202e-05
Contig130660	#N/A	0.274566649394536	30	5.93031852025183	5.05875019993463	4.22013265932017e-07	6.27549146314202e-05
Contig130732	#N/A	0.443040873557565	30	5.91764920701426	5.06958066463971	3.98693137631482e-07	6.27549146314202e-05
Contig131228	#N/A	0.384736848849761	30	5.92878196614837	5.06006126912599	4.1912177936001e-07	6.27549146314202e-05
Contig131238	#N/A	0.307822737415171	30	5.9302680857825	5.05879322250597	4.21918077493814e-07	6.27549146314202e-05
Contig131295	#N/A	0.320577827945299	30	5.92898792153296	5.05988549766574	4.1950832059346e-07	6.27549146314202e-05
Contig131491	#N/A	0.249989812612289	30	5.93115572777061	5.05803613611682	4.23596177738707e-07	6.27549146314202e-05
Contig131624	#N/A	0.18755081422347	30	5.93325949586686	5.05624269777821	4.27597110780831e-07	6.27549146314202e-05
Contig131873	ref|XP_012059797.1| PREDICTED: LOW QUALITY PROTEIN: tubulin-specific chaperone C-like [Atta cephalotes]	0.273148973414367	30	5.93010936807649	5.0589286196809	4.21618643258983e-07	6.27549146314202e-05
Contig132486	ref|XP_012532616.1| PREDICTED: uncharacterized protein LOC105834579 isoform X2 [Monomorium pharaonis]	3.26727997879729	30	5.92632757764762	5.06215689344464	4.14539655313487e-07	6.27549146314202e-05
Contig132776	ref|XP_011872717.1| PREDICTED: uncharacterized protein LOC105564717 [Vollenhovia emeryi]	0.721672660686842	30	5.92453307572791	5.06369018731727	4.11217736706401e-07	6.27549146314202e-05
Contig133002	#N/A	0.214936490308421	30	5.93209815945547	5.05723256655513	4.25384353060296e-07	6.27549146314202e-05
Contig133060	#N/A	0.408200555024237	30	5.93283415218788	5.05660519583828	4.26785495125159e-07	6.27549146314202e-05
Contig133546	#N/A	0.365957676028793	30	5.93340340116841	5.05612006662018	4.27872012945863e-07	6.27549146314202e-05
Contig133777	#N/A	0.372472021781621	30	5.92925132764859	5.05966071299888	4.20003148592846e-07	6.27549146314202e-05
Contig133862	#N/A	0.165548976754557	30	5.93474528703397	5.05497684383237	4.30442991873084e-07	6.27549146314202e-05
Contig133930	ref|XP_011881589.1| PREDICTED: 60S acidic ribosomal protein P2 [Vollenhovia emeryi]	0.360093175124233	30	5.93023498119093	5.05882146241283	4.21855607305484e-07	6.27549146314202e-05
Contig133968	#N/A	0.285280936854112	30	5.93036236776323	5.05871279689021	4.22096037872677e-07	6.27549146314202e-05
Contig134746	#N/A	0.354208307887063	30	5.9239969427083	5.06414846093502	4.10229871374479e-07	6.27549146314202e-05
Contig13484	#N/A	0.495369800221994	30	5.928264490647	5.06050295956446	4.18151968426876e-07	6.27549146314202e-05
Contig135290	#N/A	0.152392244711727	30	5.93502186000997	5.05474128109608	4.30974594604816e-07	6.27549146314202e-05
Contig135596	ref|XP_011069228.1| PREDICTED: mitogen-activated protein kinase-binding protein 1 isoform X7 [Acromyrmex echinatior]	0.458142874998824	30	5.9290136471085	5.05986354317646	4.19556625143801e-07	6.27549146314202e-05
Contig136003	ref|XP_011646738.1| PREDICTED: RNA-directed DNA polymerase from mobile element jockey-like [Pogonomyrmex barbatus]	0.388198333176251	30	5.93050568841217	5.05859054458343	4.22366688246728e-07	6.27549146314202e-05
Contig136019	ref|XP_012526392.1| PREDICTED: cubilin isoform X2 [Monomorium pharaonis]	0.737561558100883	30	5.92962430820332	5.05934245420854	4.20704708314266e-07	6.27549146314202e-05
Contig136027	ref|XP_014300712.1| PREDICTED: transmembrane GTPase Marf [Microplitis demolitor]	0.276148778665511	30	5.93075146421383	5.05838091193335	4.22831176854619e-07	6.27549146314202e-05
Contig136106	ref|XP_011877563.1| PREDICTED: UPF0160 protein MYG1, mitochondrial isoform X2 [Vollenhovia emeryi]	0.265799633830953	30	5.92697574316351	5.0616033032704	4.15745371614467e-07	6.27549146314202e-05
Contig136175	ref|XP_011646324.1| PREDICTED: E3 ubiquitin-protein ligase UBR3 [Pogonomyrmex barbatus]	9.86140498726258	30	5.88240722731477	5.09995293435244	3.39737950261026e-07	6.27549146314202e-05
Contig136522	ref|XP_011643356.1| PREDICTED: protein disulfide-isomerase TMX3 isoform X1 [Pogonomyrmex barbatus]	0.556181370338526	30	5.92785738464644	5.06085049847894	4.17390406497751e-07	6.27549146314202e-05
Contig136952	#N/A	0.335839443352554	30	5.92976668068213	5.05922098043645	4.2097277930728e-07	6.27549146314202e-05
Contig137103	ref|XP_015793822.1| PREDICTED: uncharacterized protein LOC107370338, partial [Tetranychus urticae]	0.285332509161843	30	5.92998283264696	5.05903656834179	4.21380059002184e-07	6.27549146314202e-05
Contig137253	ref|XP_011876243.1| PREDICTED: WD repeat-containing protein CG11141 isoform X1 [Vollenhovia emeryi]	2.63707772518639	30	5.91696578229153	5.07016621420811	3.97468424335165e-07	6.27549146314202e-05
Contig137365	ref|XP_011882297.1| PREDICTED: longitudinals lacking protein, isoform G-like [Vollenhovia emeryi]	0.613247530249214	30	5.92854587402936	5.06026277563581	4.18679066632868e-07	6.27549146314202e-05
Contig137645	ref|XP_011881225.1| PREDICTED: glucagon receptor-like isoform X1 [Vollenhovia emeryi]	6.04247587057747	30	5.89418855983426	5.08975912383155	3.5851863638626e-07	6.27549146314202e-05
Contig137664	ref|XP_012057068.1| PREDICTED: outer dense fiber protein 3-like [Atta cephalotes]	0.487117102347044	30	5.92696018471515	5.06161659013098	4.15716393316622e-07	6.27549146314202e-05
Contig138013	#N/A	0.259928693139765	30	5.93231674623563	5.05704622381072	4.25800058736044e-07	6.27549146314202e-05
Contig138366	#N/A	0.325012344047322	30	5.92290421367515	5.06508275631644	4.08222970188806e-07	6.27549146314202e-05
Contig138426	ref|XP_011687010.1| PREDICTED: uncharacterized protein LOC105449455 [Wasmannia auropunctata]	0.288475254698652	30	5.93122366257592	5.05797820259084	4.23724853684479e-07	6.27549146314202e-05
Contig138706	#N/A	0.165410784641524	30	5.9335937013733	5.05595790845212	4.28235784588536e-07	6.27549146314202e-05
Contig139166	#N/A	0.165410784641524	30	5.9335937013733	5.05595790845212	4.28235784588536e-07	6.27549146314202e-05
Contig139399	ref|XP_011058994.1| PREDICTED: methyltransferase-like protein 4 [Acromyrmex echinatior]	1.74108958686989	30	5.92158756039173	5.06620896745052	4.05816416956382e-07	6.27549146314202e-05
Contig139738	ref|XP_011860276.1| PREDICTED: uncharacterized protein LOC105557606 [Vollenhovia emeryi]	0.31999246539699	30	5.93038549284572	5.05869307082842	4.22139697430109e-07	6.27549146314202e-05
Contig139745	ref|XP_016766627.1| PREDICTED: formin-like protein CG32138 isoform X4 [Apis mellifera]	0.238260127130779	30	5.93212086939653	5.05721320594937	4.25427525741508e-07	6.27549146314202e-05
Contig139814	ref|XP_011630143.1| PREDICTED: spondin-1-like [Pogonomyrmex barbatus]	0.34534616912642	30	5.92211127737664	5.06576094147446	4.06772140647449e-07	6.27549146314202e-05
Contig140529	#N/A	0.256994344412381	30	5.93753321306682	5.05260331579763	4.35828465991302e-07	6.27549146314202e-05
Contig140594	ref|XP_012054562.1| PREDICTED: LOW QUALITY PROTEIN: supervillin-like [Atta cephalotes]	0.498945428068593	30	5.92079811293076	5.06688446857888	4.04379540830254e-07	6.27549146314202e-05
Contig140797	ref|XP_011646024.1| PREDICTED: LOW QUALITY PROTEIN: trafficking protein particle complex subunit 11 [Pogonomyrmex barbatus]	0.340439557840911	30	5.93069931658365	5.05842538941619	4.22732585749327e-07	6.27549146314202e-05
Contig141165	ref|XP_011693188.1| PREDICTED: E3 ubiquitin-protein ligase NEDD4 isoform X3 [Wasmannia auropunctata]	0.298747470067016	30	5.9307880102357	5.05834974175847	4.22900283508566e-07	6.27549146314202e-05
Contig141428	ref|XP_012234502.1| PREDICTED: uncharacterized protein LOC105679183 isoform X2 [Linepithema humile]	0.232185939678594	30	5.93340290421519	5.05612049009642	4.27871063346213e-07	6.27549146314202e-05
Contig141667	ref|XP_011874276.1| PREDICTED: elongator complex protein 6 [Vollenhovia emeryi]	0.420013279786752	30	5.92938830611621	5.05954382664647	4.20260677962558e-07	6.27549146314202e-05
Contig141740	#N/A	0.359204155039204	30	5.93046982740925	5.0586211334129	4.22298952938632e-07	6.27549146314202e-05
Contig141809	#N/A	0.220903639297646	30	5.93352005088125	5.05602066610432	4.28094964108082e-07	6.27549146314202e-05
Contig141821	#N/A	0.190069140227021	30	5.93777778490468	5.05239520351663	4.36303754787721e-07	6.27549146314202e-05
Contig141983	#N/A	0.245006153758023	30	5.93046148165821	5.05862825225057	4.22283190626584e-07	6.27549146314202e-05
Contig141986	#N/A	0.165410784641524	30	5.9335937013733	5.05595790845212	4.28235784588536e-07	6.27549146314202e-05
Contig142729	#N/A	0.231797764972682	30	5.93351087496155	5.05602848502311	4.28077422542631e-07	6.27549146314202e-05
Contig143223	#N/A	0.191349119422123	30	5.93461744978149	5.05508573279725	4.3019747215876e-07	6.27549146314202e-05
Contig143302	#N/A	0.154924448177496	30	5.93669231819404	5.05331898506172	4.34197823025513e-07	6.27549146314202e-05
Contig143423	ref|XP_011692311.1| PREDICTED: uncharacterized protein LOC105452679 isoform X2 [Wasmannia auropunctata]	0.40874383706512	30	5.91996374885706	5.06759859902723	4.02865833668337e-07	6.27549146314202e-05
Contig143617	#N/A	0.434113650966994	30	5.92965276534534	5.05931817379408	4.2075827769388e-07	6.27549146314202e-05
Contig143946	#N/A	0.325625169908613	30	5.92248849367974	5.06543829203128	4.07461757386261e-07	6.27549146314202e-05
Contig144178	#N/A	0.28543691217509	30	5.93336075023943	5.05615641165749	4.27790520532399e-07	6.27549146314202e-05
Contig144333	#N/A	0.304240028590821	30	5.92473603005692	5.06351672847639	4.11592247112679e-07	6.27549146314202e-05
Contig144362	#N/A	0.272373876126401	30	5.93009390377573	5.05894181218594	4.21589478668633e-07	6.27549146314202e-05
Contig144647	ref|XP_011059056.1| PREDICTED: coiled-coil domain-containing protein 115-like isoform X1 [Acromyrmex echinatior]	0.480715600381566	30	5.9295274505383	5.05942509757274	4.20522423268106e-07	6.27549146314202e-05
Contig145127	ref|XP_011643446.1| PREDICTED: LOW QUALITY PROTEIN: putative DNA helicase Ino80 [Pogonomyrmex barbatus]	0.482746489379144	30	5.93082385219078	5.05831917245668	4.22968068564878e-07	6.27549146314202e-05
Contig145418	#N/A	0.31379751894037	30	5.93009930772156	5.05893720210337	4.21599669928791e-07	6.27549146314202e-05
Contig1457	ref|XP_011168033.1| PREDICTED: MAM and LDL-receptor class A domain-containing protein 2-like [Solenopsis invicta]	19.0013075515738	30	5.92529095208036	5.06304251430338	4.12617790859276e-07	6.27549146314202e-05
Contig14627	#N/A	0.294711628535392	30	5.93070351521659	5.05842180831128	4.22740522991952e-07	6.27549146314202e-05
Contig146285	#N/A	0.321891226461058	30	5.92959413581821	5.05936819837001	4.20647916686876e-07	6.27549146314202e-05
Contig146454	#N/A	0.269782660352574	30	5.93057069113067	5.05853509930601	4.22489491909019e-07	6.27549146314202e-05
Contig146798	#N/A	0.60634912212562	30	5.91279025698261	5.07374669084059	3.90058225938128e-07	6.27549146314202e-05
Contig147375	#N/A	0.165548976754557	30	5.93474528703397	5.05497684383237	4.30442991873084e-07	6.27549146314202e-05
Contig147420	ref|XP_012229072.1| PREDICTED: LOW QUALITY PROTEIN: zinc transporter 1 [Linepithema humile]	0.35035901652236	30	5.92539083362883	5.06295716895815	4.12802621772575e-07	6.27549146314202e-05
Contig14797	ref|XP_012248349.1| PREDICTED: uncharacterized protein LOC100745157 [Bombus impatiens]	1.0466851402961	30	5.92986816075042	5.05913440008143	4.21163947322979e-07	6.27549146314202e-05
Contig148898	#N/A	0.21880769957602	30	5.93350060850628	5.0560372332299	4.28057796962772e-07	6.27549146314202e-05
Contig149304	#N/A	0.319254068275463	30	5.93011284339454	5.05892565491676	4.21625197712839e-07	6.27549146314202e-05
Contig149433	ref|XP_011881115.1| PREDICTED: sarcoplasmic calcium-binding protein 1 [Vollenhovia emeryi]	0.34576878141254	30	5.93046481963025	5.0586254049932	4.2228949486842e-07	6.27549146314202e-05
Contig149932	#N/A	0.235009682390359	30	5.93219146975665	5.05715301890461	4.2556176528185e-07	6.27549146314202e-05
Contig150078	ref|XP_012342874.1| PREDICTED: LOW QUALITY PROTEIN: zinc finger MIZ domain-containing protein 1 [Apis florea]	0.484546194127119	30	5.9295778154443	5.05938212360775	4.206172006911e-07	6.27549146314202e-05
Contig150094	ref|XP_011689959.1| PREDICTED: uncharacterized protein LOC105451287 [Wasmannia auropunctata]	0.723290115151458	30	5.92808945726998	5.06065237649361	4.17824387004643e-07	6.27549146314202e-05
Contig150217	#N/A	0.578621563260733	30	5.91876755623633	5.06862276900711	4.00704490554726e-07	6.27549146314202e-05
Contig150255	#N/A	0.175911002091371	30	5.93395895456579	5.05564669889012	4.28934761251652e-07	6.27549146314202e-05
Contig150257	#N/A	0.284163583837366	30	5.93212286298596	5.05721150638801	4.2543131583616e-07	6.27549146314202e-05
Contig16213	#N/A	0.675991486387348	30	5.92721467174843	5.06139926785383	4.16190612390496e-07	6.27549146314202e-05
Contig17665	ref|XP_015175983.1| PREDICTED: uncharacterized protein LOC107066152 [Polistes dominula]	0.323633941353214	30	5.93115228713985	5.05803907025742	4.23589661732727e-07	6.27549146314202e-05
Contig19133	ref|XP_011173391.1| PREDICTED: probable cytochrome P450 6a13 [Solenopsis invicta]	2.12829174660462	30	5.92723077288512	5.0613855187213	4.16220631929197e-07	6.27549146314202e-05
Contig19973	#N/A	0.341948367941126	30	5.93047928070607	5.05861306987456	4.22316807663561e-07	6.27549146314202e-05
Contig20223	#N/A	0.31330855960225	30	5.93093005108356	5.05822859848416	4.23168970872115e-07	6.27549146314202e-05
Contig24438	ref|XP_012061678.1| PREDICTED: high affinity cationic amino acid transporter 1 [Atta cephalotes]	0.962663580976187	30	5.90999577078935	5.07614576448219	3.8516785471531e-07	6.27549146314202e-05
Contig24861	#N/A	0.179718487624319	30	5.93505327019525	5.05471452980119	4.31035005228979e-07	6.27549146314202e-05
Contig25148	ref|XP_011863343.1| PREDICTED: uncharacterized protein LOC105559564 isoform X2 [Vollenhovia emeryi]	1.31889359608893	30	5.91106331002978	5.07522901152092	3.87029576220775e-07	6.27549146314202e-05
Contig25833	#N/A	0.379107880895659	30	5.92846939716499	5.060328052692	4.18535748769406e-07	6.27549146314202e-05
Contig2605	#N/A	0.246054501311031	30	5.9320520293577	5.0572718936938	4.25296669539342e-07	6.27549146314202e-05
Contig26491	ref|XP_011869035.1| PREDICTED: cell adhesion molecule 2-like [Vollenhovia emeryi]	0.798096031388381	30	5.92322803682994	5.06480584800442	4.08816789652477e-07	6.27549146314202e-05
Contig26659	#N/A	0.311773124822254	30	5.92928107443775	5.05963532903436	4.20059062761608e-07	6.27549146314202e-05
Contig27272	#N/A	0.348315225510463	30	5.92977830880143	5.05921105945423	4.20994680427067e-07	6.27549146314202e-05
Contig27904	ref|XP_011170681.1| PREDICTED: kinesin-like protein KIF17 [Solenopsis invicta]	0.287830673172153	30	5.93143352949929	5.05779924040259	4.24122584177726e-07	6.27549146314202e-05
Contig2848	ref|XP_011706366.1| PREDICTED: uncharacterized protein LOC105461562 [Wasmannia auropunctata]	1.75536675304991	30	5.92671057223593	5.0618297678542	4.15251724615629e-07	6.27549146314202e-05
Contig28650	ref|XP_011053933.1| PREDICTED: uncharacterized protein LOC105145810 isoform X1 [Acromyrmex echinatior]	0.294462526261336	30	5.9328744017918	5.05657089098998	4.26862238309567e-07	6.27549146314202e-05
Contig28850	#N/A	0.226860773141755	30	5.93112523760031	5.05806213799285	4.23538437323787e-07	6.27549146314202e-05
Contig29760	ref|YP_009236613.1| cytochrome c oxidase subunit I (mitochondrion) [Hormaphis betulae]	2.58557912770158	30	5.93181942606591	5.05747020352178	4.24854784887478e-07	6.27549146314202e-05
Contig30533	ref|XP_011883494.1| PREDICTED: zinc transporter ZIP9-A [Vollenhovia emeryi]	1.78001469488238	30	5.89592729418762	5.08825813194388	3.61367280932284e-07	6.27549146314202e-05
Contig32029	#N/A	0.270448264926552	30	5.93109714364196	5.05808609662708	4.23485240904505e-07	6.27549146314202e-05
Contig32314	#N/A	0.265934635143903	30	5.93087044874484	5.05827943120035	4.23056207391257e-07	6.27549146314202e-05
Contig32779	#N/A	0.411209076122003	30	5.92453120786338	5.06369178377899	4.11214291355479e-07	6.27549146314202e-05
Contig35400	ref|XP_015114610.1| PREDICTED: organic cation transporter protein [Diachasma alloeum]	0.763722608751202	30	5.92805907660605	5.06067831179167	4.17767551725551e-07	6.27549146314202e-05
Contig36685	#N/A	0.214993123045229	30	5.93226083719189	5.05709388432773	4.25693697226271e-07	6.27549146314202e-05
Contig37307	ref|XP_014214078.1| PREDICTED: uncharacterized protein LOC106643444 [Copidosoma floridanum]	0.577406935199799	30	5.91922674970786	5.06822956249828	4.01532962030187e-07	6.27549146314202e-05
Contig39413	#N/A	0.267398475492373	30	5.92786382779709	5.06084499770782	4.17402449906609e-07	6.27549146314202e-05
Contig40122	ref|XP_011876200.1| PREDICTED: polycomb protein Sfmbt-like isoform X4 [Vollenhovia emeryi]	0.69816233167218	30	5.92825232481956	5.06051334461596	4.18129192247086e-07	6.27549146314202e-05
Contig40197	ref|XP_004207219.1| PREDICTED: zinc finger MYM-type protein 1-like [Hydra vulgaris]	0.30179780525365	30	5.93121007431537	5.05798979029804	4.23699113253046e-07	6.27549146314202e-05
Contig40617	#N/A	0.262999264704972	30	5.93107155439481	5.05810791943162	4.23436792372571e-07	6.27549146314202e-05
Contig41265	#N/A	0.451437809270307	30	5.92840884372089	5.06037973945989	4.18422302396497e-07	6.27549146314202e-05
Contig43177	#N/A	0.361149072946156	30	5.92181459319669	5.06601473718303	4.06230480311994e-07	6.27549146314202e-05
Contig44321	#N/A	0.377101861378748	30	5.92719874091824	5.06141287163123	4.16160912272825e-07	6.27549146314202e-05
Contig4487	ref|XP_011865488.1| PREDICTED: uncharacterized protein LOC105560735 [Vollenhovia emeryi]	0.16538847921927	30	5.93345013926734	5.05608023929639	4.27961330499038e-07	6.27549146314202e-05
Contig45609	ref|XP_011706366.1| PREDICTED: uncharacterized protein LOC105461562 [Wasmannia auropunctata]	2.33141332986988	30	5.92643906729316	5.06206166289029	4.14746826384492e-07	6.27549146314202e-05
Contig45983	ref|XP_012539824.1| PREDICTED: dual specificity tyrosine-phosphorylation-regulated kinase 4 isoform X3 [Monomorium pharaonis]	0.414035068891538	30	5.92818483922812	5.06057095276168	4.1800286954432e-07	6.27549146314202e-05
Contig46213	#N/A	0.324951393322016	30	5.92909458048245	5.05979447498692	4.19708624864065e-07	6.27549146314202e-05
Contig46456	#N/A	0.684901008780991	30	5.9277644832659	5.06092981337064	4.17216791441682e-07	6.27549146314202e-05
Contig46989	ref|XP_011158121.1| PREDICTED: uncharacterized protein LOC105194744 isoform X2 [Solenopsis invicta]	0.928554048489625	30	5.92859025020261	5.0602248989926	4.18762247720365e-07	6.27549146314202e-05
Contig47415	ref|XP_011876905.1| PREDICTED: coiled-coil domain-containing protein 132 [Vollenhovia emeryi]	0.844309517815939	30	5.92874734470572	5.06009081779974	4.19056832247513e-07	6.27549146314202e-05
Contig48130	#N/A	0.406904280550292	30	5.92890176186043	5.0599590286661	4.19346575815687e-07	6.27549146314202e-05
Contig48662	ref|XP_011861886.1| PREDICTED: uncharacterized protein LOC105558678 [Vollenhovia emeryi]	0.256789818328263	30	5.93121244676967	5.05798776712829	4.23703607326089e-07	6.27549146314202e-05
Contig48856	#N/A	0.257634170446349	30	5.9310712198421	5.05810820474327	4.23436158991202e-07	6.27549146314202e-05
Contig49442	ref|XP_011069209.1| PREDICTED: vascular endothelial growth factor receptor 3 [Acromyrmex echinatior]	1.1075186653422	30	5.92711182537839	5.06148709250728	4.15998907352116e-07	6.27549146314202e-05
Contig49815	ref|XP_011862507.1| PREDICTED: protein transport protein Sec24C [Vollenhovia emeryi]	0.748000749511539	30	5.92970847351494	5.05927064272975	4.20863163556464e-07	6.27549146314202e-05
Contig49832	ref|XP_011684806.1| PREDICTED: anoctamin-4 [Wasmannia auropunctata]	0.422488546680834	30	5.92958375223481	5.0593770580765	4.2062837388269e-07	6.27549146314202e-05
Contig49907	ref|XP_011868906.1| PREDICTED: uncharacterized protein CG7065-like [Vollenhovia emeryi]	2.59512384803766	30	5.91784699214998	5.06941123009685	3.99048199243384e-07	6.27549146314202e-05
Contig51657	#N/A	0.269874716507469	30	5.93073417691814	5.05839565643612	4.22798490963885e-07	6.27549146314202e-05
Contig52119	#N/A	0.201934459897966	30	5.93220588477233	5.0571407302313	4.25589178626305e-07	6.27549146314202e-05
Contig52151	ref|XP_008178499.1| PREDICTED: uncharacterized protein K02A2.6-like [Acyrthosiphon pisum]	0.438943682631503	30	5.92889933150179	5.05996110283104	4.19342014186191e-07	6.27549146314202e-05
Contig52520	#N/A	0.262747290088032	30	5.93216301613598	5.05717727553971	4.25507659030271e-07	6.27549146314202e-05
Contig53083	ref|XP_011700704.1| PREDICTED: cytoskeleton-associated protein 5 isoform X1 [Wasmannia auropunctata]	0.201880211858915	30	5.93144726489469	5.05778752810553	4.24148626462839e-07	6.27549146314202e-05
Contig53432	#N/A	1.34582281245753	30	5.92929012969837	5.05962760191769	4.20076084984332e-07	6.27549146314202e-05
Contig53467	#N/A	0.263604551522574	30	5.9337710461396	5.05580679920528	4.28575038593851e-07	6.27549146314202e-05
Contig54562	ref|XP_011877461.1| PREDICTED: chromosome transmission fidelity protein 18 homolog [Vollenhovia emeryi]	3.81378085009949	30	5.89141266179522	5.09215730117579	3.54012201163561e-07	6.27549146314202e-05
Contig58250	ref|XP_011861716.1| PREDICTED: synaptic vesicle 2-related protein isoform X2 [Vollenhovia emeryi]	1.77712570944361	30	5.91127843914974	5.07504430874264	3.87405716106303e-07	6.27549146314202e-05
Contig58323	#N/A	0.386127003962753	30	5.92999552310635	5.05902574177406	4.21403981615588e-07	6.27549146314202e-05
Contig58804	ref|XP_011704437.1| PREDICTED: WD repeat-containing protein 60 [Wasmannia auropunctata]	1.7717594773592	30	5.91463479005233	5.07216439643175	3.93316373375005e-07	6.27549146314202e-05
Contig59611	ref|XP_013184891.1| PREDICTED: uncharacterized protein LOC106130566 [Amyelois transitella]	0.46476399823281	30	5.92888632745738	5.0599722010298	4.19317607166873e-07	6.27549146314202e-05
Contig59639	ref|XP_011163813.1| PREDICTED: dynein intermediate chain 3, ciliary [Solenopsis invicta]	0.542172150031646	30	5.92900615872076	5.05986993382931	4.19542563793358e-07	6.27549146314202e-05
Contig61050	ref|XP_011689473.1| PREDICTED: probable helicase with zinc finger domain [Wasmannia auropunctata]	0.643989872954928	30	5.92817221849597	5.06058172642145	4.17979249232654e-07	6.27549146314202e-05
Contig62510	#N/A	0.413674244398877	30	5.92358701508211	5.06449891317823	4.09475973757968e-07	6.27549146314202e-05
Contig62835	ref|XP_011701836.1| PREDICTED: chymotrypsin-1-like [Wasmannia auropunctata]	0.667687426579056	30	5.93229528852135	5.05706451566028	4.25759234730448e-07	6.27549146314202e-05
Contig64874	ref|XP_011869361.1| PREDICTED: integrin alpha-PS1 isoform X2 [Vollenhovia emeryi]	5.20303757521301	30	5.89533794990963	5.0887667941852	3.60399482191202e-07	6.27549146314202e-05
Contig666	#N/A	0.604988976539729	30	5.92209518376566	5.06577470795125	4.06742741849198e-07	6.27549146314202e-05
Contig68613	ref|XP_012055196.1| PREDICTED: mitochondrial ribosome-associated GTPase 2 [Atta cephalotes]	1.66737472519026	30	3.68621387459906	8.1384317406876	4.00430698543224e-16	2.8289828206031e-11
Contig69295	#N/A	0.591795564625271	30	5.92951292847019	5.05943748869436	4.20495098954382e-07	6.27549146314202e-05
Contig70188	ref|XP_011693598.1| PREDICTED: ankyrin repeat and death domain-containing protein 1A-like isoform X4 [Wasmannia auropunctata]	0.696244655235381	30	5.91606510526829	5.07093810940059	3.95859503433643e-07	6.27549146314202e-05
Contig71794	#N/A	0.446340637807102	30	5.9270269270995	5.06155959286	4.15840716636905e-07	6.27549146314202e-05
Contig72193	#N/A	0.260729362020902	30	5.93172979141516	5.05754662719435	4.24684611809621e-07	6.27549146314202e-05
Contig72226	#N/A	0.358402780670856	30	5.93005649927861	5.05897372202937	4.21518943819932e-07	6.27549146314202e-05
Contig74074	ref|XP_011860502.1| PREDICTED: tubulin polyglutamylase TTLL5 [Vollenhovia emeryi]	0.426756363311718	30	5.92681981538519	5.06173646820243	4.15455030450856e-07	6.27549146314202e-05
Contig74143	ref|XP_011866478.1| PREDICTED: adenosine 3'-phospho 5'-phosphosulfate transporter 1 [Vollenhovia emeryi]	0.532115918136174	30	5.92856029635681	5.06025046560384	4.1870609900753e-07	6.27549146314202e-05
Contig7426	ref|XP_011686305.1| PREDICTED: uncharacterized protein LOC105449025 isoform X2 [Wasmannia auropunctata]	3.19062111865095	30	5.92285178178795	5.06512759482626	4.08126894015204e-07	6.27549146314202e-05
Contig74878	ref|XP_011875055.1| PREDICTED: uncharacterized protein LOC105566005 isoform X1 [Vollenhovia emeryi]	0.218560197408586	30	5.93182839666627	5.05746255519802	4.24871819079555e-07	6.27549146314202e-05
Contig75734	#N/A	0.192928673020596	30	5.93294197798068	5.05651329666479	4.26991112192857e-07	6.27549146314202e-05
Contig75965	#N/A	0.434432307830625	30	5.93057123203851	5.05853463793371	4.2249051392971e-07	6.27549146314202e-05
Contig78287	#N/A	0.235446350947368	30	5.93215239949017	5.05718632626132	4.25487472414235e-07	6.27549146314202e-05
Contig79661	ref|XP_011168829.1| PREDICTED: uncharacterized protein LOC105202139 [Solenopsis invicta]	1.290801071711	30	5.93282251482628	5.05661511448037	4.26763308667193e-07	6.27549146314202e-05
Contig79712	ref|XP_011864062.1| PREDICTED: uncharacterized protein LOC105559977 [Vollenhovia emeryi]	0.424482949419507	30	5.92923861842974	5.05967155829276	4.19979261464625e-07	6.27549146314202e-05
Contig80837	ref|XP_011632110.1| PREDICTED: uncharacterized protein LOC105423871 [Pogonomyrmex barbatus]	0.289615082748237	30	5.93171944853281	5.05755544581941	4.24664979553564e-07	6.27549146314202e-05
Contig81773	#N/A	0.302826695742053	30	5.93117054039958	5.05802350407192	4.23624231513774e-07	6.27549146314202e-05
Contig82190	#N/A	1.11929908272619	30	5.90688208722213	5.07882154358499	3.79783232996808e-07	6.27549146314202e-05
Contig82902	ref|XP_011054731.1| PREDICTED: coiled-coil domain-containing protein 103-like [Acromyrmex echinatior]	0.218852278600041	30	5.93387690909275	5.05571660140601	4.2877766441993e-07	6.27549146314202e-05
Contig83466	ref|XP_011647984.1| PREDICTED: THO complex subunit 3 [Pogonomyrmex barbatus]	7.72670766447813	30	5.88898611973827	5.09425551190352	3.50114320531717e-07	6.27549146314202e-05
Contig87563	#N/A	0.547134979193598	30	5.9278438893619	5.06086201997288	4.17365182382365e-07	6.27549146314202e-05
Contig87789	ref|XP_011861262.1| PREDICTED: hamartin isoform X1 [Vollenhovia emeryi]	3.76023078679202	30	5.91117086859783	5.07513666359575	3.87217595035485e-07	6.27549146314202e-05
Contig88024	#N/A	0.326714140140038	30	5.93340820504287	5.05611597302587	4.27881192493055e-07	6.27549146314202e-05
Contig88171	ref|XP_012535848.1| PREDICTED: replication factor C subunit 1 [Monomorium pharaonis]	0.264298397640433	30	5.93115851139307	5.05803376226979	4.23601449540954e-07	6.27549146314202e-05
Contig90815	#N/A	0.271585652178254	30	5.93045823420668	5.05863102229791	4.22277057426113e-07	6.27549146314202e-05
Contig91313	#N/A	0.546758794502274	30	5.92935151432608	5.05957522125584	4.20191492959509e-07	6.27549146314202e-05
Contig91669	#N/A	0.432776717249389	30	5.9338109232926	5.05577282252758	4.28651355023135e-07	6.27549146314202e-05
Contig91879	ref|XP_011867199.1| PREDICTED: uncharacterized protein LOC105561647 [Vollenhovia emeryi]	0.18557805503694	30	5.93300449171302	5.05646001817507	4.27110362324008e-07	6.27549146314202e-05
Contig92832	ref|XP_011067808.1| PREDICTED: tight junction protein ZO-1 isoform X2 [Acromyrmex echinatior]	1.10744864887351	30	5.91606906841494	5.07093471240317	3.95866570271337e-07	6.27549146314202e-05
Contig94454	#N/A	0.284437392483289	30	5.9308388984664	5.05830633972496	4.22996527276123e-07	6.27549146314202e-05
Contig94846	ref|XP_011698806.1| PREDICTED: pre-rRNA-processing protein TSR1 homolog [Wasmannia auropunctata]	3.32670567985954	30	5.91526745864808	5.07162190209002	3.94439472372222e-07	6.27549146314202e-05
Contig94886	#N/A	0.338149558252881	30	5.93130314483589	5.05791042329705	4.2387544589944e-07	6.27549146314202e-05
Contig94993	ref|XP_012055293.1| PREDICTED: protein slit [Atta cephalotes]	0.407595290089982	30	5.92786355092179	5.0608452340869	4.17401932370461e-07	6.27549146314202e-05
Contig95163	ref|XP_011864288.1| PREDICTED: integrin beta-nu isoform X1 [Vollenhovia emeryi]	3.6177422456213	30	5.89416176219945	5.0897822642732	3.58474889599959e-07	6.27549146314202e-05
Contig95694	#N/A	0.284946377221383	30	5.93107113979997	5.05810827300443	4.23436007454088e-07	6.27549146314202e-05
Contig96114	ref|XP_012523237.1| PREDICTED: putative inorganic phosphate cotransporter isoform X1 [Monomorium pharaonis]	0.552344891829588	30	5.93110554753062	5.05807892973516	4.2350115319705e-07	6.27549146314202e-05
Contig97816	#N/A	5.85550972812937	30	5.9066832939441	5.07899247463595	3.79441738591436e-07	6.27549146314202e-05
Contig98144	#N/A	0.259592487828922	30	5.93049099714377	5.05860307594237	4.22338937782212e-07	6.27549146314202e-05
Contig98531	#N/A	0.279081860094043	30	5.93047170792427	5.05861952935618	4.22302504670196e-07	6.27549146314202e-05
Contig98799	ref|XP_012530039.1| PREDICTED: uncharacterized protein LOC105833121 isoform X2 [Monomorium pharaonis]	0.5101987330649	30	5.92793475975895	5.06078444109259	4.17535054950232e-07	6.27549146314202e-05
Contig99246	#N/A	0.248295321847082	30	5.93074492815488	5.05838648659155	4.22818818560996e-07	6.27549146314202e-05
Contig99477	#N/A	0.269408235332787	30	5.9288158657014	5.06003233690424	4.19185380938889e-07	6.27549146314202e-05
Contig99920	#N/A	0.285695513193213	30	5.93103750838113	5.05813695455594	4.2337234015135e-07	6.27549146314202e-05
Contig99947	#N/A	0.345641700797442	30	5.93046442509602	5.05862574152686	4.22288749729229e-07	6.27549146314202e-05
Contig21651	ref|XP_012541776.1| PREDICTED: peroxisomal multifunctional enzyme type 2 isoform X2 [Monomorium pharaonis]	2735.03816446588	-0.698844271359231	0.195862972831726	-3.56802646899288	0.000359680176774521	0.024674766058796
Contig14374	ref|XP_011705419.1| PREDICTED: superoxide dismutase [Cu-Zn] [Wasmannia auropunctata]	2691.71083798952	-0.769293815339192	0.198881846283937	-3.86809469900485	0.000109689068443545	0.00896917610177522
Contig10485	ref|XP_011876846.1| PREDICTED: uncharacterized protein LOC105566980 [Vollenhovia emeryi]	1221.94881268669	-0.938480725723006	0.267473224662032	-3.50869036296561	0.000450318839704192	0.0297049453142084
Contig125417	ref|XP_011172404.1| PREDICTED: uncharacterized protein LOC105204860 [Solenopsis invicta]	107.597628180691	-0.94037599711167	0.275670469701121	-3.41123225179402	0.000646699807799841	0.0402895691105354
Contig98235	ref|XP_011158971.1| PREDICTED: lysosomal aspartic protease, partial [Solenopsis invicta]	266.82874564708	-1.10430500819542	0.329573016518537	-3.35071426617629	0.000806034250871922	0.04817691266728
Contig137175	#N/A	131.288548549885	-1.13411203154759	0.321983588505949	-3.52226657516936	0.000427873659963494	0.0285310356450504
Contig22760	#N/A	30.4731111104731	-1.3495107865802	0.356070425898761	-3.79001087544377	0.000150640689170954	0.0118358012359199
Contig77293	ref|XP_011874825.1| PREDICTED: short/branched chain specific acyl-CoA dehydrogenase, mitochondrial-like [Vollenhovia emeryi]	303.472265326853	-1.49707392738836	0.447811915285462	-3.34308640812747	0.000828520968417308	0.0491880366699413
Contig107705	ref|XP_001608103.1| PREDICTED: superoxide dismutase [Cu-Zn] [Nasonia vitripennis]	68.5018121560834	-1.61081084174776	0.46380404715001	-3.47304179781504	0.000514595207605393	0.0331861063665081
Contig89651	ref|XP_011879720.1| PREDICTED: juvenile hormone epoxide hydrolase 1-like [Vollenhovia emeryi]	601.270286127338	-1.76487575351381	0.52272170217531	-3.37632003065735	0.000734624148769255	0.0447607539235228
Contig112521	ref|XP_011875710.1| PREDICTED: slit homolog 3 protein-like [Vollenhovia emeryi]	62.1179871965121	-1.91433605758332	0.546272236338273	-3.50436271558544	0.000457701489461064	0.0301359959722181
Contig11452	ref|XP_012529155.1| PREDICTED: juvenile hormone epoxide hydrolase 2-like [Monomorium pharaonis]	378.382830961729	-1.93231262844586	0.487239664863553	-3.96583605110841	7.31391248852679e-05	0.00635568199810191
Contig117851	ref|XP_011695183.1| PREDICTED: alpha-ketoglutarate-dependent dioxygenase alkB homolog 4 [Wasmannia auropunctata]	6.23199446957825	-10.0897368922076	2.82180956124405	-3.57562644580428	0.000349390251389152	0.0241289317451285
Contig41404	ref|XP_015930380.1| PREDICTED: lysosomal protective protein-like [Parasteatoda tepidariorum]	23.5455534308127	-10.7575366980998	2.62055037271082	-4.10506770261838	4.04196485826796e-05	0.0037998503564783
Contig57118	ref|XP_011053257.1| PREDICTED: uncharacterized protein LOC105145440 isoform X1 [Acromyrmex echinatior]	8.06999600913819	-11.6025074549772	2.91907954296539	-3.97471438657359	7.0463765159505e-05	0.00613829754977965
Contig21433	ref|XP_012054157.1| PREDICTED: protein mesh [Atta cephalotes]	83.0351671057388	-11.6370135525482	2.85066767243949	-4.08220630733491	4.46101683586619e-05	0.00414689668327227
Contig34203	ref|XP_012062981.1| PREDICTED: RNA polymerase-associated protein CTR9 homolog [Atta cephalotes]	6.15559961988031	-12.5495571729803	3.69931207437829	-3.3924029442932	0.00069282471915274	0.0426367832500543
Contig91645	ref|XP_011874188.1| PREDICTED: uncharacterized protein LOC105565527 [Vollenhovia emeryi]	4.77410913900142	-12.6547442851993	3.48145262577983	-3.63490348583006	0.000278084721620194	0.019996201990213
Contig68822	#N/A	5.5678787553057	-13.0389700971617	3.67497868954365	-3.54803964830087	0.000388109793752772	0.0262637689309796
Contig32142	ref|XP_011164526.1| PREDICTED: helicase domino [Solenopsis invicta]	23.5281129137485	-13.2506136032337	3.58124060024774	-3.70000652911091	0.000215593920146776	0.0161949889074848
Contig95128	ref|XP_011876482.1| PREDICTED: sodium-dependent nutrient amino acid transporter 1-like isoform X1 [Vollenhovia emeryi]	2.10564039353002	-13.2952270284723	3.97658394620098	-3.34337894241459	0.000827647961496997	0.0491568617131741
Contig145982	#N/A	2.62274621731399	-13.5862401754849	3.95134372614135	-3.43838479188759	0.000585195489918421	0.0369465447448629
Contig33376	ref|XP_011705674.1| PREDICTED: transmembrane protein 43 homolog isoform X1 [Wasmannia auropunctata]	25.9168185222117	-14.3699297126423	4.13855197443371	-3.47221197206509	0.000516188585082263	0.033273676325898
Contig76771	ref|XP_011870164.1| PREDICTED: microtubule-associated proteins 1A/1B light chain 3A-like isoform X2 [Vollenhovia emeryi]	4.5435162024204	-14.8311896627269	3.69142941043761	-4.01773622456149	5.87599189755728e-05	0.00527149223586763
Contig60581	#N/A	3.07357884095086	-15.0182425254141	4.34836754701695	-3.45376566332736	0.000552817511631271	0.0353125931017015
Contig10885	ref|XP_012532761.1| PREDICTED: vitellogenin receptor [Monomorium pharaonis]	19.5379063002311	-15.0382634327281	4.45109946163712	-3.37855030253513	0.000728690997831692	0.0444567581695271
Contig64022	ref|XP_011876051.1| PREDICTED: uncharacterized protein LOC105566560 [Vollenhovia emeryi]	1.80629641267279	-15.470982613745	4.28106248640005	-3.61381845345466	0.000301720365889561	0.0213481134397082
Contig45596	ref|XP_012527438.1| PREDICTED: uncharacterized protein LOC105831678 [Monomorium pharaonis]	14.3005309123205	-16.3711113355357	3.83404343336125	-4.26993371882159	1.95531066345171e-05	0.00197907973362275
Contig138607	ref|XP_011176102.1| PREDICTED: E3 ubiquitin-protein ligase MYCBP2-like [Solenopsis invicta]	1.07558629951011	-16.6981618711119	3.35427686471346	-4.97817042080644	6.41881281355936e-07	8.67073608142923e-05
Contig77917	ref|XP_011875304.1| PREDICTED: fatty acid synthase-like [Vollenhovia emeryi]	2.29163456653676	-16.9698399195754	4.52375455121225	-3.75127335655907	0.000175938751104045	0.0135770713898134
Contig83602	ref|XP_012532235.1| PREDICTED: NF-kappa-B-repressing factor [Monomorium pharaonis]	1.88351230791111	-17.0197251029315	4.73661230074412	-3.59322740015216	0.000326607316242076	0.0228007084797711
Contig12934	ref|XP_012557434.1| PREDICTED: glucan endo-1,3-beta-glucosidase-like [Hydra vulgaris]	4.56748635410237	-17.0520673873739	4.97686691497455	-3.42626549568105	0.000611941916173179	0.0384120643845054
Contig11706	#N/A	2.97989211088685	-17.4639313092811	5.09412626693393	-3.42824861304278	0.000607488861693586	0.0382283787570337
Contig37651	ref|XP_012151618.1| PREDICTED: putative adenosylhomocysteinase 3 isoform X6 [Megachile rotundata]	1.8202058904687	-17.6416683784406	3.71908177460176	-4.74355484703738	2.10000051583631e-06	0.000258470185440874
Contig136997	ref|XP_012055692.1| PREDICTED: potassium voltage-gated channel protein eag isoform X1 [Atta cephalotes]	1.95894680430088	-17.72667731301	3.77605032932342	-4.69450239456586	2.67256480457992e-06	0.000322756742899769
Contig57633	#N/A	0.747420238794659	-17.7882049855872	3.88684876925367	-4.57651070098176	4.72795535229084e-06	0.000546235410803466
Contig116309	ref|XP_011867770.1| PREDICTED: general transcription factor IIH subunit 2 [Vollenhovia emeryi]	2.79683548395511	-17.8025154167239	4.44569334062912	-4.00444071434866	6.21643781836584e-05	0.00552974163592008
Contig134934	ref|XP_011056905.1| PREDICTED: calcitonin gene-related peptide type 1 receptor-like isoform X3 [Acromyrmex echinatior]	3.47306412324848	-18.1763334781309	4.64880042510151	-3.90989756841067	9.23352675466863e-05	0.00772019052878423
Contig141984	#N/A	1.05733574540929	-18.1961858397291	4.40157226426608	-4.13401956102229	3.56473114509114e-05	0.00338044172220095
Contig91504	ref|XP_011687884.1| PREDICTED: gamma-glutamyltranspeptidase 1-like [Wasmannia auropunctata]	3.10470149495642	-18.2092225712161	5.16269762811217	-3.5270751616485	0.000420177467384681	0.0281044158225958
Contig57398	ref|XP_968724.1| PREDICTED: pathogenesis-related protein 5 [Tribolium castaneum]	4.00695574950425	-18.2094577762129	4.45296019656729	-4.08929273390996	4.32690506269818e-05	0.00404083743981536
Contig30913	ref|XP_011165435.1| PREDICTED: uncharacterized protein LOC105199862, partial [Solenopsis invicta]	2.00928639062348	-18.2633231756475	5.00958672633382	-3.64567461815622	0.000266691249363328	0.0193145430350027
Contig78607	#N/A	0.722011876390949	-18.4670302437219	5.36394319462184	-3.44280869011399	0.000575706415686217	0.0364451565489316
Contig112540	#N/A	0.678517976293027	-18.5966467321436	5.31843839292637	-3.49663667381717	0.000471163067135438	0.0308070004151023
Contig11009	#N/A	1.74939342916152	-18.9029420887009	3.0488815646929	-6.19995945647855	5.64777078324032e-10	3.06928103215195e-06
Contig146041	#N/A	4.18366286121112	-18.9320836298686	3.48208037085305	-5.4370036339025	5.41840335555305e-08	6.27549146314202e-05
Contig81145	#N/A	2.3588360721122	-19.1084656210216	3.12546372845865	-6.11380175269068	9.72851504806949e-10	4.74003445085198e-06
Contig40615	ref|XP_011687032.1| PREDICTED: uncharacterized protein LOC105449474 [Wasmannia auropunctata]	2.38617993716953	-19.1325762507065	5.51211760940974	-3.47100290785618	0.000518518384484119	0.0334086147617202
Contig24457	#N/A	0.836661440191406	-19.1653888683465	5.33577367443287	-3.59186690398437	0.000328317527297538	0.0228861774319488
Contig142838	ref|XP_012538806.1| PREDICTED: probable multidrug resistance-associated protein lethal(2)03659 [Monomorium pharaonis]	4.20344309678459	-19.1694814889273	4.23902169344057	-4.5221475319624	6.1215367418e-06	0.000693628530077076
Contig62026	#N/A	1.57051298731101	-19.2508636636828	3.90046570835024	-4.93552952471031	7.99335866394362e-07	0.000106150150295042
Contig109227	#N/A	0.800087651797991	-19.3903325074212	4.4175207233296	-4.38941517693802	1.13655898978991e-05	0.00121385015555816
Contig57548	#N/A	0.649769204435221	-19.6412762605087	5.30171532353396	-3.70470216937571	0.000211639253891874	0.0159063785410426
Contig31290	ref|XP_011643532.1| PREDICTED: LOW QUALITY PROTEIN: uncharacterized protein LOC105431194 [Pogonomyrmex barbatus]	0.622681588621738	-19.7038824488456	5.39766599331955	-3.65044492809156	0.000261786437083056	0.0190080360742675
Contig34798	ref|XP_014790039.1| PREDICTED: polygalacturonase-like, partial [Octopus bimaculoides]	2.3629439272657	-19.7355649464135	5.90153219080556	-3.34414255626039	0.00082537313645631	0.0491188697580466
Contig21147	ref|XP_011068655.1| PREDICTED: ras GTPase-activating protein-binding protein 2 isoform X1 [Acromyrmex echinatior]	1.06277860571645	-19.7487413740858	5.91388309978039	-3.33938649798796	0.000839636548539625	0.0497851973978193
Contig150072	ref|XP_011884061.1| PREDICTED: THAP domain-containing protein 2-like [Vollenhovia emeryi]	1.63000973632559	-19.761680208635	5.91252592294071	-3.3423414063961	0.000830748128552882	0.0492995457035433
Contig17712	ref|XP_012529148.1| PREDICTED: uncharacterized protein LOC105832595 isoform X3 [Monomorium pharaonis]	0.65725335108648	-19.7633731126254	5.90569710536869	-3.34649284580801	0.000818407914014318	0.0487926510660258
Contig134062	ref|XP_012236297.1| PREDICTED: guanylate cyclase 32E [Bombus impatiens]	0.977644762590019	-19.7688497273863	5.9217019630313	-3.33837296284102	0.000842705542472422	0.0499043441050821
Contig60653	#N/A	0.410390888684237	-19.7861418681227	5.92767437376858	-3.33792658309324	0.000844060481994702	0.0499636421970697
Contig34586	#N/A	0.411517530560297	-19.8010527118977	5.92234226316805	-3.34344957316018	0.000827437306856315	0.0491568617131741
Contig46895	ref|XP_011860942.1| PREDICTED: exonuclease 1 isoform X2 [Vollenhovia emeryi]	1.53066179573084	-19.807328463595	5.90858703831363	-3.352295283992	0.000801444885780664	0.047963472268594
Contig123974	ref|XP_011877702.1| PREDICTED: transcription factor Sox-14-like [Vollenhovia emeryi]	4.64824671587249	-19.8121659464886	5.92011009069364	-3.34658741864161	0.000818128786486769	0.0487926510660258
Contig20179	#N/A	0.255968100970228	-19.8252780969682	5.92507620998025	-3.34599545969962	0.000819877381954883	0.0488390448727146
Contig107547	#N/A	0.446430551839208	-19.8255864337262	5.9156102132562	-3.35140175214712	0.000804035633991181	0.0480777922031536
Contig39455	#N/A	0.952316438323428	-19.8288666799313	5.91036807873726	-3.35492923888553	0.000793852880424538	0.0475897456280636
Contig2192	#N/A	19.3390610589161	-19.831142391926	5.91534590421343	-3.3524907440832	0.000800879193247012	0.0479499268509419
Contig60267	ref|XP_013778625.1| PREDICTED: 40S ribosomal protein S6-like [Limulus polyphemus]	0.843075589576251	-19.8573366214119	5.92478992389016	-3.35156805161013	0.00080355286967732	0.0480692674965268
Contig33813	#N/A	1.51866287808337	-19.8585569562192	5.91539348311982	-3.35709822396222	0.00078765125634006	0.0472792012203332
Contig85197	#N/A	0.466494418239418	-19.8591455570924	5.91428138879988	-3.3578289992594	0.000785571950835761	0.0472537079341169
Contig89855	ref|XP_013078499.1| PREDICTED: carbamoyl-phosphate synthase large chain-like [Biomphalaria glabrata]	1.12022274234309	-19.8685513589783	5.91121260879445	-3.36116338116797	0.000776148996220237	0.0468264409559909
Contig71231	ref|XP_011647140.1| PREDICTED: venom metalloproteinase 3 isoform X3 [Pogonomyrmex barbatus]	1.08467273177075	-19.8828895236112	5.92191863888134	-3.35750805373562	0.000786484522304595	0.0472683554011367
Contig81924	#N/A	0.341605013079639	-19.8906743144062	5.92063942606296	-3.35954833304768	0.000780699937352257	0.0470006642727149
Contig148964	ref|XP_011868733.1| PREDICTED: gamma-aminobutyric acid type B receptor subunit 1 isoform X2 [Vollenhovia emeryi]	1.03432945420861	-19.893322549168	5.90782031559785	-3.36728632329009	0.00075911828365164	0.0460348223712986
Contig33851	ref|XP_012062869.1| PREDICTED: uncharacterized protein LOC105626167 [Atta cephalotes]	0.289685743965843	-19.8999536912266	5.92526284558119	-3.3584929833226	0.000783687108148439	0.0471604077172274
Contig142142	#N/A	0.329979587301183	-19.9146447714816	5.92747726146594	-3.35971677208196	0.000780224149358215	0.0470006642727149
Contig103822	ref|XP_011645733.1| PREDICTED: uncharacterized protein LOC105432571 [Pogonomyrmex barbatus]	0.478807723289518	-19.9174847085009	5.91816644516452	-3.36548234880663	0.000764099558517898	0.046297159228089
Contig45040	ref|XP_009016465.1| hypothetical protein HELRODRAFT_105094 [Helobdella robusta]	16.7483439101095	-19.9338595937267	5.91260630533053	-3.37141669245849	0.000747826523344119	0.0454671446940422
Contig56776	ref|XP_011869208.1| PREDICTED: uncharacterized protein LOC105562756 isoform X2 [Vollenhovia emeryi]	0.970028734530784	-19.9391811306517	5.92256982845096	-3.36664348554701	0.000760889869031187	0.046122460671171
Contig73308	#N/A	0.2842096834619	-19.9426236995304	5.92237620353443	-3.36733483557306	0.000758984745037414	0.0460348223712986
Contig48087	#N/A	1.44862988314748	-19.9551699094734	5.86625193985842	-3.40168988888584	0.000669705847677504	0.0414487197368761
Contig139659	#N/A	0.369523801505117	-19.9659276391431	5.92676455164587	-3.36877354670662	0.000755034340580332	0.0458659016427254
Contig129942	ref|XP_011707031.1| PREDICTED: cytochrome P450 4C1-like, partial [Wasmannia auropunctata]	0.498727133365544	-19.9745576207325	5.91091065569246	-3.37926908123644	0.000726788348990533	0.0443670990087089
Contig88216	#N/A	0.280371504213617	-19.9898460116928	5.92393865416703	-3.37441813271167	0.000739719148329313	0.0450517657333995
Contig148988	ref|XP_012064439.1| PREDICTED: alcohol dehydrogenase class-3 [Atta cephalotes]	173.182602049718	-2.05557408578742	0.597318215643875	-3.44133835525446	0.000578844209689092	0.0365946086337538
Contig101488	ref|XP_011868194.1| PREDICTED: uncharacterized protein LOC105562182 isoform X1 [Vollenhovia emeryi]	78.7981367082223	-2.06044379698842	0.612785405846603	-3.3624230886207	0.000772616455919694	0.0466731027670308
Contig78448	ref|XP_011869401.1| PREDICTED: diuretic hormone receptor-like isoform X4 [Vollenhovia emeryi]	37.2993177789275	-2.10862734386783	0.631546907941852	-3.3388293369049	0.000841322352085869	0.0498642300262907
Contig93478	ref|XP_011872790.1| PREDICTED: lipase 3-like [Vollenhovia emeryi]	77.2866720297655	-2.16616356484384	0.640762423376785	-3.38060330290323	0.000723268815432255	0.0442022983625135
Contig24482	ref|XP_011883193.1| PREDICTED: SET and MYND domain-containing protein 4 [Vollenhovia emeryi]	102.326993021773	-2.33423533926015	0.694381069909097	-3.36160566641849	0.000774907011339683	0.0467732143101063
Contig5208	#N/A	18.736017658342	-2.39601840458417	0.606327393596039	-3.95169083549687	7.76009535119344e-05	0.00667494932522486
Contig10063	ref|XP_011169823.1| PREDICTED: UDP-glucuronosyltransferase 2B1-like [Solenopsis invicta]	27.9707381986682	-2.41211149899575	0.681307420227266	-3.54041571746149	0.000399497212043608	0.0268881497085248
Contig50963	#N/A	110.240287359923	-2.48349091804059	0.72581151422656	-3.42167473147219	0.00062236720193153	0.0389281179864185
Contig36077	#N/A	8.00095758087397	-2.50495091301255	0.71697949303113	-3.4937553128926	0.000476277328668613	0.0310695095608906
Contig1246	ref|XP_011055164.1| PREDICTED: protein croquemort-like [Acromyrmex echinatior]	8.61073449657382	-2.74159961056888	0.770833118934707	-3.55667075431032	0.000375584389658555	0.0255630768331333
Contig127008	ref|XP_011876484.1| PREDICTED: sodium-dependent nutrient amino acid transporter 1-like [Vollenhovia emeryi]	16.4865578347395	-2.75689918342173	0.808768619547848	-3.40876131539699	0.000652585502531044	0.0405986400812156
Contig97152	#N/A	12.7642895219494	-2.82879895972372	0.822476645873402	-3.43936690958534	0.000583076400068611	0.0368292114888219
Contig36	#N/A	32.0346166833033	-2.95271250498608	0.871331080498248	-3.38873772676357	0.00070215135044839	0.0430487487107764
Contig22911	#N/A	8.90828307446284	-2.99789216027148	0.865895411892247	-3.46218737170597	0.000535803993483454	0.0343812429006501
Contig66032	ref|XP_011637602.1| PREDICTED: bestrophin-2 isoform X3 [Pogonomyrmex barbatus]	1.45830321426671	-20.0135058943027	5.85686706018669	-3.41710093274079	0.000632918097717002	0.0395530422172133
Contig109634	ref|XP_011878526.1| PREDICTED: ectonucleotide pyrophosphatase/phosphodiesterase family member 5-like isoform X1 [Vollenhovia emeryi]	1.75733834555345	-20.0365525237769	5.06669088959575	-3.95456382881401	7.66744008926771e-05	0.00661004443131946
Contig129003	#N/A	0.364922613885445	-20.0383471313257	5.92673468673742	-3.38100964366881	0.000722200081565343	0.0441560817502978
Contig63018	#N/A	1.28204345924857	-20.0500624267751	5.91272970718028	-3.39099932175604	0.000696382734568666	0.0427998222037185
Contig29771	#N/A	0.362394557356839	-20.0523258400541	5.92706227210871	-3.38318123202709	0.00071651332498713	0.0438463331661786
Contig69046	ref|XP_012059366.1| PREDICTED: solute carrier family 17 member 9 [Atta cephalotes]	1.14476857426114	-20.053969260756	5.91651029369738	-3.38949283703921	0.000700220382319173	0.0429982787312265
Contig65220	ref|XP_011566844.1| PREDICTED: ATP-dependent DNA helicase srs2-like [Plutella xylostella]	0.768018199591536	-20.0852161331223	5.91819412136861	-3.39380826671455	0.000689279327180757	0.0424555802496336
Contig92583	ref|XP_013393600.1| PREDICTED: flavin reductase (NADPH)-like [Lingula anatina]	4.00145257309539	-20.0930314359658	5.91447029601759	-3.39726643812805	0.000680626620583047	0.0419592057628808
Contig134818	ref|XP_011866885.1| PREDICTED: sodium-independent sulfate anion transporter [Vollenhovia emeryi]	3.51683596869058	-20.098402131759	5.90672832730403	-3.40262849720945	0.000667409628993577	0.0413791041456364
Contig84657	ref|XP_011176124.1| PREDICTED: GPN-loop GTPase 1 [Solenopsis invicta]	4.40381491517829	-20.1033792564288	5.89286589183492	-3.4114774755495	0.000646118393239458	0.0402788753003204
Contig62096	#N/A	0.313827031356122	-20.1115114838758	5.92702059371398	-3.3931907550997	0.000690835123048849	0.0425328672685984
Contig117513	ref|XP_011174709.1| PREDICTED: uncharacterized protein LOC105206957, partial [Solenopsis invicta]	0.203268195147063	-20.1217446281858	5.927058288788	-3.39489568817796	0.000686547526354184	0.0423057591937493
Contig107677	#N/A	0.303625421221545	-20.1263113356299	5.917381365337	-3.40121923753747	0.00067086001569706	0.0414838107824716
Contig44623	#N/A	0.93398793062092	-20.1362623657979	4.38914821723091	-4.58773806880046	4.48074326056316e-06	0.000520533555163086
Contig78629	#N/A	0.382863187083607	-20.1444468514724	5.92450994541903	-3.40018786989268	0.000673395685429516	0.0415860096871216
Contig80170	ref|XP_011859007.1| PREDICTED: uncharacterized protein LOC105556520 [Vollenhovia emeryi]	1.27586315549723	-20.1513752536848	5.90807491700136	-3.41081918167561	0.000647680278868644	0.0403151014816312
Contig100740	#N/A	0.448682456791529	-20.1533181056399	5.92704227934662	-3.4002318788692	0.000673287305387581	0.0415860096871216
Contig69824	#N/A	0.254815315767817	-20.1623972307441	5.93028806866224	-3.39990182556045	0.000674100516590155	0.0416113502370639
Contig87331	#N/A	0.537970855866502	-20.164259467527	5.92644554637723	-3.4024204406726	0.000667917987753716	0.0413806170875747
Contig20914	ref|XP_015125965.1| PREDICTED: PTS system alpha-glucoside-specific EIICB component-like, partial [Diachasma alloeum]	0.764566859758686	-20.1672737802107	5.92355388636458	-3.40459024550004	0.000662634011384111	0.0411371695547191
Contig35971	ref|XP_011501107.1| PREDICTED: serine/threonine-protein phosphatase 2A regulatory subunit B'' subunit beta-like isoform X2 [Ceratosolen solmsi marchali]	0.211179319569399	-20.1793159945995	5.92864218499232	-3.40369942474875	0.000664798645177156	0.0412353178962233
Contig83072	#N/A	0.287139514940145	-20.2222617526779	5.92881488739276	-3.41084384261672	0.00064762170440749	0.0403151014816312
Contig114540	#N/A	0.605579582105528	-20.2312529265299	5.92504661279886	-3.41453059336745	0.000638920178110855	0.0398752227944035
Contig31706	#N/A	0.492244448881263	-20.2785304615398	5.91431982557597	-3.42871725905775	0.000606440940021923	0.0382025347758705
Contig131261	ref|XP_011068620.1| PREDICTED: lysosomal alpha-mannosidase isoform X2 [Acromyrmex echinatior]	0.703844466261711	-20.2805456812535	5.92160751836529	-3.42483787018227	0.000615166407615361	0.0385973214461934
Contig55087	ref|XP_011566844.1| PREDICTED: ATP-dependent DNA helicase srs2-like [Plutella xylostella]	0.713726120919409	-20.2949230781925	5.92004419615855	-3.42817087267045	0.000607662856878049	0.0382283787570337
Contig76185	#N/A	0.251079472272149	-20.3016938816249	5.92886786936538	-3.42421088291144	0.000616587536377831	0.0386521602163169
Contig145747	#N/A	0.259814927862016	-20.3113009576403	5.92755655677608	-3.42658914564407	0.000611213097875604	0.038386392189844
Contig34412	ref|XP_011862122.1| PREDICTED: transcription factor A, mitochondrial isoform X2 [Vollenhovia emeryi]	0.263129996429603	-20.3121555301624	5.92533722444587	-3.42801679647219	0.000608007840706409	0.0382323655138502
Contig14340	#N/A	0.229010852164952	-20.3299791507888	5.93073708014081	-3.42790092969457	0.000608267391913029	0.0382323655138502
Contig32342	#N/A	0.191118408234625	-20.3360966186611	5.93185036219201	-3.42828887732533	0.000607398762121135	0.0382283787570337
Contig56075	#N/A	0.278285837720039	-20.3407258942803	5.92567171387436	-3.43264474922809	0.000597724722613519	0.0376870638693094
Contig112718	#N/A	0.503133733211864	-20.349277975742	5.92165972606944	-3.43641460622206	0.000589468143640786	0.037183071558934
Contig116306	ref|XP_011867770.1| PREDICTED: general transcription factor IIH subunit 2 [Vollenhovia emeryi]	3.69953324373539	-20.3651249110733	5.91218881180139	-3.44459988666503	0.000571905280992099	0.0362207532444377
Contig126186	#N/A	0.549728573035683	-20.3670556693602	5.918296871149	-3.44137107562942	0.000578774209302887	0.0365946086337538
Contig94496	ref|XP_012540752.1| PREDICTED: poly(ADP-ribose) glycohydrolase-like [Monomorium pharaonis]	0.573064097973668	-20.3741534761458	5.92274902005817	-3.43998258361887	0.000581751621543845	0.0367619672939538
Contig23519	#N/A	0.605212111572875	-20.3992939708405	5.91908524732027	-3.446359212359	0.000568194541159451	0.0360114635824105
Contig86934	#N/A	0.527203893748683	-20.4176233720494	5.92275359105323	-3.44731940273385	0.000566178793786637	0.0359224809275575
Contig76013	#N/A	0.615813798116918	-20.4181180906718	5.90945180350802	-3.45516280859606	0.00054996061969632	0.0351778115351883
Contig34759	#N/A	0.306141139310148	-20.4257329437138	5.92128346771929	-3.44954485882453	0.000561532425165386	0.0357561275703441
Contig30778	ref|XP_011169789.1| PREDICTED: uncharacterized protein LOC105202807 [Solenopsis invicta]	0.364584845022547	-20.4315013243462	5.92445120087054	-3.4486740850096	0.000563346205365546	0.035823190269818
Contig129552	#N/A	0.518681132109727	-20.4356336347532	5.9197876364371	-3.45208897511273	0.000556264263212765	0.0354686243678583
Contig119187	#N/A	0.314602643800601	-20.438940403263	5.9248498910737	-3.44969759217968	0.000561214850085821	0.0357520174357873
Contig65778	#N/A	0.282245178768799	-20.4528543422384	5.93100558864956	-3.4484631714696	0.000563786348263007	0.035835051574682
Contig75541	ref|XP_003730293.1| PREDICTED: LOW QUALITY PROTEIN: proline synthase co-transcribed bacterial homolog protein [Strongylocentrotus purpuratus]	0.319490250073886	-20.4720543619698	5.92689490579671	-3.45409437612051	0.00055214411662881	0.0352855301887385
Contig126049	#N/A	0.332043578286019	-20.4812914529092	5.91896262490606	-3.46028396373499	0.000539606024334737	0.0345937896644398
Contig121866	#N/A	0.247700473831993	-20.4948182808733	5.92608586823941	-3.45840724156806	0.000543379348156621	0.0348198964882023
Contig123416	ref|XP_011172203.1| PREDICTED: adenosine 3'-phospho 5'-phosphosulfate transporter 1-like [Solenopsis invicta]	0.629883035535231	-20.5098826329264	5.92340696710281	-3.46251452024711	0.000535153037998248	0.0343706903681993
Contig34002	ref|XP_013783884.1| PREDICTED: superoxide dismutase [Cu-Zn] 2-like [Limulus polyphemus]	1.04960989649352	-20.5369467272386	5.21432151510076	-3.93856548119698	8.19702245083398e-05	0.00698561327645047
Contig113608	ref|XP_011686313.1| PREDICTED: protein I'm not dead yet [Wasmannia auropunctata]	1.15029395947929	-20.5814075894875	5.90074412529032	-3.48793425921936	0.000486767747496804	0.0316369928325924
Contig5698	ref|XP_012546702.1| PREDICTED: cytochrome P450 9e2-like [Bombyx mori]	0.351499869279366	-20.5814674271646	5.92149574460726	-3.47572105340248	0.000509481917350438	0.032901401497196
Contig132674	ref|XP_011699935.1| PREDICTED: uncharacterized protein LOC105457141 isoform X1 [Wasmannia auropunctata]	8.15775726419313	-20.5950512104325	5.87211392891737	-3.50726356125546	0.000452740489580857	0.0298232507954808
Contig15708	#N/A	0.506610973932557	-20.6323935039548	5.911083371272	-3.49045889019747	0.000482191792450334	0.0313828897733095
Contig61322	#N/A	0.617956214441692	-20.6349237823601	5.91496563362145	-3.48859571813375	0.000485564937591622	0.0315733405369919
Contig97000	#N/A	0.236621981893346	-20.6426541732485	5.92900086151387	-3.48164128415689	0.000498350803594766	0.0322414067425216
Contig36261	ref|XP_011701218.1| PREDICTED: integrin alpha-3-like [Wasmannia auropunctata]	0.354999309835271	-20.6476190754671	5.92024518011765	-3.48762905036591	0.000487323681641035	0.0316585628711877
Contig121206	ref|XP_012527420.1| PREDICTED: uncharacterized protein LOC105831671 [Monomorium pharaonis]	2.40263574044785	-20.6554093631289	5.90569057995754	-3.49754344279876	0.000469564228831163	0.0307166744634985
Contig86452	ref|XP_012539260.1| PREDICTED: uncharacterized protein LOC105838320 [Monomorium pharaonis]	1.94399838279595	-20.6758898292643	5.90636055692135	-3.5006142327419	0.000464187249109554	0.030421273533132
Contig17965	ref|XP_011703661.1| PREDICTED: folliculin isoform X1 [Wasmannia auropunctata]	1.51614657909565	-20.6814129403567	5.91714109144153	-3.49516981609074	0.000473760224940284	0.0309481731407246
Contig108235	#N/A	0.33064679659324	-20.6896267242032	5.92145327147338	-3.49401165147677	0.000475820251503314	0.0310683798875526
Contig99376	ref|XP_011879313.1| PREDICTED: peroxisome assembly factor 2 [Vollenhovia emeryi]	5.32126900150041	-20.6921830133971	3.75053156239442	-5.51713341673274	3.44573846777031e-08	6.27549146314202e-05
Contig56498	ref|XP_011157951.1| PREDICTED: forkhead box protein P1 isoform X4 [Solenopsis invicta]	1.10127003953467	-20.694005107845	5.90874520047503	-3.50226730138598	0.000461316552186229	0.0302612093195253
Contig46744	ref|XP_011866107.1| PREDICTED: succinyl-CoA ligase [ADP/GDP-forming] subunit alpha, mitochondrial isoform X3 [Vollenhovia emeryi]	0.715037550127993	-20.6963570197771	5.91035958377252	-3.50170860612289	0.000462284916561023	0.0303106597936533
Contig119519	#N/A	0.252216681456504	-20.711620312461	5.92802046738769	-3.49385101256035	0.000476106638763931	0.0310695095608906
Contig608	#N/A	2.93390030271809	-20.7117287096228	5.91226769380246	-3.5031784388474	0.00045974137295831	0.0302212789056143
Contig87147	ref|XP_011859489.1| PREDICTED: ATP-dependent DNA helicase RRM3-like [Vollenhovia emeryi]	0.240981151457027	-20.7170332144816	5.92692319578179	-3.49541111469538	0.000473332075872244	0.0309345061630529
Contig77877	#N/A	3.73264574996533	-20.7301513684811	5.90680101441277	-3.50953948133667	0.000448883410617693	0.0296244181550902
Contig143333	ref|XP_011693337.1| PREDICTED: conserved oligomeric Golgi complex subunit 7 [Wasmannia auropunctata]	4.71723082560236	-20.7333327412389	5.28466727238847	-3.92329955181233	8.73444396333155e-05	0.00736366783226049
Contig75288	ref|XP_011876018.1| PREDICTED: uncharacterized protein LOC105566540 [Vollenhovia emeryi]	1.19452754635074	-20.7339087811756	5.90038050625514	-3.51399520068157	0.000441420788153661	0.0292274756812314
Contig126320	ref|XP_012521308.1| PREDICTED: uncharacterized protein LOC105827759 [Monomorium pharaonis]	45.6893060458127	-20.7398258082898	5.0725233295393	-4.08866050699335	4.33871288913325e-05	0.0040465156111938
Contig22322	ref|XP_011631935.1| PREDICTED: DNA (cytosine-5)-methyltransferase PliMCI-like [Pogonomyrmex barbatus]	3.01582018386786	-20.7456829178514	5.90438873787636	-3.51360383586684	0.000442071593523477	0.0292568571194785
Contig143607	ref|XP_011702828.1| PREDICTED: probable E3 ubiquitin-protein ligase HERC3 [Wasmannia auropunctata]	1.36844873363908	-20.7463979383403	5.91414997620577	-3.50792557202788	0.000451615379522938	0.0297630122576738
Contig81218	ref|XP_001659191.1| AAEL001411-PB [Aedes aegypti]	0.311366148721271	-20.7486329530435	5.92405174767383	-3.50243951889698	0.00046101843623401	0.0302556999463804
Contig132955	ref|XP_009064700.1| hypothetical protein LOTGIDRAFT_148309 [Lottia gigantea]	0.287297102316124	-20.7512463273125	5.92395176617287	-3.50293978519658	0.000460153472828376	0.0302270131335337
Contig23651	#N/A	0.678195202984459	-20.7609693761717	5.91487536475084	-3.50995889108582	0.000448175977778614	0.0295915519309275
Contig126799	ref|XP_012522739.1| PREDICTED: OTU domain-containing protein 7B-like [Monomorium pharaonis]	0.884023890392631	-20.7740146371519	5.91130428473896	-3.51428612646172	0.000440937583707385	0.0292228694958266
Contig64237	#N/A	0.377848181880522	-20.7744758539319	5.92106776974497	-3.50856917397294	0.000450524057894709	0.0297049453142084
Contig96202	#N/A	0.643626067065519	-20.8002508159162	5.91191941766907	-3.51835831079667	0.00043422562811434	0.0288864305911826
Contig105688	ref|XP_011169522.1| PREDICTED: putative nuclease HARBI1 [Solenopsis invicta]	0.815094767700065	-20.8047447395929	5.92142924508135	-3.51346674569732	0.000442299774186402	0.0292582543039401
Contig119374	#N/A	0.304860989435274	-20.8129262557306	5.92272082316412	-3.51408193584442	0.000441276676298344	0.0292274756812314
Contig31895	ref|XP_011867780.1| PREDICTED: cleft lip and palate transmembrane protein 1-like protein [Vollenhovia emeryi]	0.624252711900496	-20.8131331673209	5.91228518071431	-3.52031956022904	0.000431027152853487	0.0286871613832968
Contig51616	ref|XP_012063366.1| PREDICTED: DEP domain-containing protein 5 [Atta cephalotes]	1.37317055686946	-20.8178805005645	5.89880321052618	-3.52917019903561	0.000416864936234067	0.0279287647676932
Contig47969	#N/A	0.387663916326116	-20.8244162838636	5.92514602469198	-3.5145827962858	0.000440445347354462	0.0292039447419725
Contig27160	#N/A	0.466889959520185	-20.8294778199148	5.92149596173968	-3.51760398968427	0.00043546169118553	0.0289142060993618
Contig140439	#N/A	0.274394862517849	-20.8413834657472	5.92396427894785	-3.51814806510765	0.000434569816105701	0.0288897770428403
Contig129055	ref|XP_011859583.1| PREDICTED: uncharacterized protein YER152C-like isoform X1 [Vollenhovia emeryi]	1.26721147011231	-20.846853474715	5.91769216629097	-3.52280126929636	0.00042701141767892	0.0284870435806958
Contig97670	#N/A	0.409224338213294	-20.8555407393743	5.92810669784129	-3.51807782862086	0.000434684855255798	0.0288897770428403
Contig48406	#N/A	0.225502191989243	-20.8717736618553	5.92683412462929	-3.52157209447139	0.000428995999462542	0.0285923810075749
Contig129306	#N/A	0.267274192225503	-20.8846260937476	5.92841542260968	-3.5228007157019	0.000427012309560101	0.0284870435806958
Contig83058	ref|XP_011692840.1| PREDICTED: dystrobrevin beta-like isoform X4 [Wasmannia auropunctata]	2.3686838151327	-20.9042318822005	5.47893146498298	-3.81538480921033	0.000135970874420404	0.0108055549173115
Contig33219	#N/A	0.63164830620048	-20.9158361066242	5.92783483823762	-3.5284107397369	0.000418062913550732	0.0279957514198947
Contig56483	ref|XP_011056375.1| PREDICTED: F-box/LRR-repeat protein 4-like isoform X4 [Acromyrmex echinatior]	0.507117626153263	-20.9172890791905	5.91965984837959	-3.53352888762964	0.000410051276112768	0.0275244727605253
Contig16318	ref|XP_011871381.1| PREDICTED: sushi, von Willebrand factor type A, EGF and pentraxin domain-containing protein 1-like [Vollenhovia emeryi]	0.353150772177388	-20.9217351234067	5.92312156600931	-3.53221437214275	0.000412095139681731	0.0276485313160539
Contig5677	ref|XP_015786741.1| PREDICTED: ATP-binding cassette sub-family A member 1-like [Tetranychus urticae]	0.792057423296783	-20.9551265753558	5.91002901632951	-3.54568928806549	0.000391587633789706	0.0264484502349828
Contig1886	#N/A	0.342390264993153	-20.9595225590355	5.92097088797951	-3.53987934674472	0.000400309997633596	0.0268881497085248
Contig104199	#N/A	15.1224500905087	-20.9627469285186	5.91358810120663	-3.54484393734512	0.000392845608316607	0.0265207386136224
Contig130682	#N/A	0.332697619427553	-20.9654724483825	5.92170306826501	-3.54044642338427	0.000399450728729812	0.0268881497085248
Contig3009	#N/A	0.949794758845509	-20.9789721437588	5.31496663505246	-3.947150299195	7.9086912267466e-05	0.00679315710799765
Contig23652	ref|XP_011700750.1| PREDICTED: uncharacterized protein LOC105457654 [Wasmannia auropunctata]	0.249629059404767	-20.9840246719498	5.92729570945847	-3.54023583444041	0.00039976962452647	0.0268881497085248
Contig86771	ref|XP_011057096.1| PREDICTED: uncharacterized protein LOC105147640 [Acromyrmex echinatior]	0.297871784867273	-20.9943998831579	5.92077762417883	-3.54588556027211	0.000391296098161735	0.0264413987479477
Contig88968	ref|XP_015754943.1| PREDICTED: 40S ribosomal protein S21-like [Acropora digitifera]	0.289180822728423	-20.9944033489174	5.92532107400965	-3.54316721181668	0.000395351940305765	0.0266771934619788
Contig86165	#N/A	0.356123421987646	-21.0074758514471	5.92203643176539	-3.54733985403474	0.000389142253423024	0.02632103062801
Contig35243	#N/A	0.496774800989131	-21.0078909716642	5.91805046265543	-3.54979922936276	0.000385525049473621	0.0261389313413984
Contig148196	#N/A	0.295522690502601	-21.0190279904463	5.92255476063525	-3.54897993179413	0.0003867265522944	0.0262078185417467
Contig29725	#N/A	0.516895115231909	-21.0294514061207	5.91018108628719	-3.5581737850492	0.000373442213983253	0.0254417861664376
Contig98394	ref|XP_011705187.1| PREDICTED: uncharacterized protein LOC105460437 isoform X3 [Wasmannia auropunctata]	0.642573314462613	-21.0369782477629	5.90684522652338	-3.56145750244158	0.000368801809229988	0.0251863650259882
Contig61382	#N/A	0.226070966888884	-21.0457847675789	5.92494328837624	-3.55206518328492	0.000382220161849363	0.0259522163425418
Contig124445	#N/A	0.34226602967878	-21.0517914180338	5.92344286745783	-3.55397897626193	0.000379449545303208	0.0257764819243786
Contig102066	#N/A	0.759665347990531	-21.0550595195	5.91413510272494	-3.56012487942638	0.000370678475664398	0.025302297862779
Contig117416	#N/A	0.350270325490658	-21.0614867848323	5.92254166046021	-3.55615679758607	0.000376319531637728	0.0256007803860453
Contig144697	#N/A	0.518156975915611	-21.0625868349178	5.92373571015058	-3.5556256837769	0.000377080627359079	0.025640212417688
Contig73305	ref|XP_012249091.1| PREDICTED: probable proline--tRNA ligase, mitochondrial [Bombus impatiens]	0.536646337058487	-21.0795082634675	5.92278872945288	-3.55905118793841	0.000372196991906863	0.0253751058364012
Contig46682	ref|XP_011703274.1| PREDICTED: hemicentin-2 isoform X1 [Wasmannia auropunctata]	2.41630014383344	-21.0915612421881	5.91383809118566	-3.56647593609711	0.000361814016842668	0.0247570145945852
Contig120697	#N/A	0.516792023525079	-21.0955989537719	5.91305248438167	-3.56763262451879	0.000360221066952668	0.024674766058796
Contig75155	ref|XP_011695401.1| PREDICTED: homeobox protein rough [Wasmannia auropunctata]	0.390123370526093	-21.1054800864801	5.91812816865105	-3.56624248158025	0.000362136319882099	0.0247670743419075
Contig27109	ref|XP_011647676.1| PREDICTED: LOW QUALITY PROTEIN: uncharacterized protein LOC105433888, partial [Pogonomyrmex barbatus]	0.325552271566273	-21.1092064344245	5.92141238505795	-3.56489382291484	0.000364003514700027	0.0248827308256264
Contig65320	#N/A	0.282401883417798	-21.1198509871498	5.92874993048305	-3.56227724811949	0.000367651818917637	0.025119970530757
Contig67783	#N/A	0.563801360974861	-21.1354367641036	5.91834603373022	-3.57117286546733	0.000355386232596761	0.0244474238107227
Contig80584	ref|XP_011172617.1| PREDICTED: nuclear pore complex protein Nup205 [Solenopsis invicta]	0.672449286238063	-21.1370605199658	5.91454160061502	-3.57374450080254	0.000351912329894814	0.0242675239029514
Contig66303	#N/A	0.787661251939605	-21.1406118622858	5.91763600293115	-3.57247587580824	0.000353622067888717	0.0243379139437272
Contig54291	ref|XP_011865747.1| PREDICTED: trafficking protein particle complex subunit 11 [Vollenhovia emeryi]	1.93539304680225	-21.1425878272249	4.75522481024997	-4.44618050058363	8.74105111070272e-06	0.000961155096333823
Contig145163	#N/A	0.296665407059725	-21.1429192514575	5.92636661582325	-3.56760231387076	0.000360262725884457	0.024674766058796
Contig41921	#N/A	0.255577497728021	-21.1508497088661	5.92624173565118	-3.56901568520677	0.000358324974513431	0.0246136334097347
Contig72883	#N/A	0.521862924692376	-21.1817350675343	5.92733460972991	-3.57356830045731	0.000352149333553743	0.0242720216503138
Contig24387	#N/A	0.680981097193732	-21.2020872612029	5.90450661242484	-3.59083131799486	0.000329624923698571	0.022954663796864
Contig70879	ref|XP_011698932.1| PREDICTED: urea transporter 2-like isoform X3 [Wasmannia auropunctata]	4.8182810868358	-21.2106390935233	5.90104843340344	-3.594384850912	0.000325158910702547	0.0227445438641276
Contig117879	#N/A	0.355850947893576	-21.2256500209738	5.92323170811374	-3.58345765739648	0.000339075751122586	0.0234933146656847
Contig146004	#N/A	0.396549766175577	-21.2278473134149	5.92248881023674	-3.58427816304585	0.000338011708789964	0.0234389803967089
Contig39748	ref|XP_012057564.1| PREDICTED: LOW QUALITY PROTEIN: eukaryotic translation initiation factor 2A [Atta cephalotes]	3.09553664541287	-21.2329366956361	5.90659664136042	-3.59478359279764	0.000324661328663451	0.0227209865062702
Contig21949	ref|XP_015928043.1| PREDICTED: sulfotransferase family cytosolic 1B member 1-like [Parasteatoda tepidariorum]	1.51631272677334	-21.2334004283349	5.91469284800282	-3.58994135012517	0.000330752372504562	0.023010496296296
Contig130448	ref|XP_011063359.1| PREDICTED: uncharacterized protein LOC105151380 [Acromyrmex echinatior]	0.242876496706372	-21.2390458858754	5.92711393177238	-3.58337061348243	0.000339188814468791	0.0234933146656847
Contig98954	#N/A	0.296157431942933	-21.2469891835343	5.9279070643132	-3.58423115494574	0.000338072585040679	0.0234389803967089
Contig46030	#N/A	0.406694761709003	-21.2503145642047	5.91889093019974	-3.59025277113657	0.000330357441430699	0.0229943425624795
Contig77180	#N/A	0.52712739088359	-21.2550111075095	5.92113437860189	-3.58968564947994	0.00033107697160465	0.0230217435319007
Contig147918	ref|XP_005089741.1| PREDICTED: acyl-CoA-binding protein [Aplysia californica]	0.510302171933078	-21.2578116169625	5.91515474412265	-3.59378791198733	0.000325905153079139	0.0227822557211418
Contig98855	#N/A	0.770608555770435	-21.2744407297279	5.92261575832492	-3.59206836942347	0.000328063747730616	0.0228797746115957
Contig69753	ref|XP_011877730.1| PREDICTED: retinol dehydrogenase 12-like [Vollenhovia emeryi]	1.77321617292091	-21.2830548315874	5.91246599402618	-3.5996917112236	0.000318594674744102	0.0223851177311374
Contig104142	#N/A	0.288697140895109	-21.2899270481583	5.92788876338179	-3.59148558584164	0.000328798364579276	0.0229083937475138
Contig20854	ref|XP_011671730.1| PREDICTED: prostaglandin reductase 1 isoform X1 [Strongylocentrotus purpuratus]	4.0466674876872	-21.2928323463454	4.38178688578824	-4.85939478604173	1.17745135338079e-06	0.000150289380197512
Contig82401	#N/A	0.438706223179825	-21.2950367361635	5.92780441971691	-3.59239867383824	0.000327648071011041	0.0228620688837763
Contig42140	#N/A	0.688651191880574	-21.2958049936822	5.91962069637729	-3.59749485414071	0.000321296850441908	0.022530164306149
Contig108003	#N/A	0.376856557944513	-21.3058646156179	5.91699301459998	-3.60079259229247	0.000317248585428113	0.0223016285448936
Contig75506	ref|XP_013078547.1| PREDICTED: elongation factor 4-like [Biomphalaria glabrata]	0.294880622304149	-21.3060086719894	5.92893045046234	-3.59356697637227	0.000326181754204759	0.0227822557211418
Contig101188	#N/A	0.729863287348209	-21.3085497502267	5.92180444537907	-3.59832040162257	0.000320278905209182	0.0224810971034982
Contig78720	ref|XP_014237487.1| PREDICTED: aspartate--tRNA ligase, mitochondrial [Trichogramma pretiosum]	0.99674203082649	-21.3174818775337	5.91684498966506	-3.60284609699407	0.000314751903358374	0.022170239127033
Contig95580	#N/A	0.311540406029787	-21.3203697099564	5.92500719242772	-3.59837026648748	0.000320217515881692	0.0224810971034982
Contig7004	ref|XP_012247586.1| PREDICTED: 30S ribosomal protein S3, chloroplastic-like [Bombus impatiens]	0.607825348421842	-21.3228254382966	5.91929928173996	-3.6022550007015	0.000315468675365219	0.0221985943342029
Contig39007	#N/A	0.414600154389859	-21.3455665665981	5.92504747794379	-3.60259840044452	0.000315052078035626	0.0221803255955156
Contig47897	ref|XP_011874896.1| PREDICTED: uncharacterized protein LOC105565918 [Vollenhovia emeryi]	1.00856129759676	-21.3670239353527	5.90495656554531	-3.61848960245137	0.00029632740260663	0.0210402879427683
Contig51751	#N/A	0.361352766239101	-21.3691712855185	5.9205942195051	-3.60929502905618	0.000307030263026934	0.0216912275374583
Contig38152	ref|XP_011169061.1| PREDICTED: prohormone-4 [Solenopsis invicta]	0.57483818238145	-21.3701763131381	5.9202503976031	-3.60967440191214	0.000306581590378799	0.0216703646702117
Contig78525	#N/A	0.721013534170711	-21.387198981834	5.38195660048674	-3.9738705770871	7.07139977236225e-05	0.00615630051531404
Contig107693	ref|XP_011699550.1| PREDICTED: RNA-directed DNA polymerase from mobile element jockey-like [Wasmannia auropunctata]	0.345650987773623	-21.4193088747851	5.92188875139289	-3.61697251907123	0.000298068935562074	0.0211320854932837
Contig39697	ref|XP_011693815.1| PREDICTED: WD repeat-containing protein mio-B [Wasmannia auropunctata]	2.16409857434754	-21.4202409861728	5.91118842679415	-3.62367758217272	0.00029044362693916	0.0206869370945291
Contig25423	#N/A	0.851229551066651	-21.4202831088737	5.91563896120435	-3.6209584880604	0.000293513611291201	0.0208824736830881
Contig42362	ref|XP_011643356.1| PREDICTED: protein disulfide-isomerase TMX3 isoform X1 [Pogonomyrmex barbatus]	0.458861703137776	-21.4320654698632	5.91993888212434	-3.62031870541414	0.000294240359963273	0.0209236437552745
Contig10978	#N/A	0.509436593298058	-21.4325057963015	5.91733195058967	-3.62198808099074	0.000292347594373451	0.0208099939759121
Contig79717	#N/A	0.24764078377313	-21.4325112015944	5.92941297558705	-3.61460928591711	0.000300800912424909	0.0212937207028569
Contig93050	ref|XP_012056683.1| PREDICTED: LOW QUALITY PROTEIN: golgin subfamily A member 4-like [Atta cephalotes]	1.63286989181164	-21.4337689159607	5.89536943871531	-3.63569563176205	0.000277231509291001	0.0199653315842459
Contig79099	ref|XP_011563249.1| PREDICTED: 6-phosphogluconolactonase [Plutella xylostella]	0.644767142261019	-21.441857920223	5.9141578781737	-3.6255132787974	0.000288388076522676	0.0205592179860871
Contig149524	ref|XP_011704520.1| PREDICTED: uncharacterized protein LOC105459876 [Wasmannia auropunctata]	3.05874964694729	-21.4426815098747	5.8962230697473	-3.63668084742147	0.000276173766446706	0.0199196144347219
Contig50029	ref|XP_011693535.1| PREDICTED: GTP cyclohydrolase 1 isoform X1 [Wasmannia auropunctata]	0.521719438769764	-21.4468535969686	5.91857438959179	-3.62365194474608	0.00029047243179647	0.0206869370945291
Contig148946	ref|XP_011170481.1| PREDICTED: general transcription factor IIH subunit 1-like, partial [Solenopsis invicta]	1.39261117534182	-21.4624579463663	5.91355450464303	-3.62936672512531	0.000284117371762322	0.0203574707291586
Contig77564	#N/A	0.362153033229381	-21.4758306286156	5.92041788077475	-3.62741804060042	0.000286269602273598	0.020459805762495
Contig138220	#N/A	0.83912223283107	-21.4778206358834	5.2464002732573	-4.09382043252841	4.24322977378253e-05	0.0039679393603319
Contig49403	#N/A	0.38703568483512	-21.4922711425464	5.92465558577906	-3.62759840321086	0.000286069760620235	0.020459805762495
Contig144751	ref|XP_012225660.1| PREDICTED: LOW QUALITY PROTEIN: utrophin-like [Linepithema humile]	0.332169972927385	-21.507930958376	5.92080694258961	-3.63260129352723	0.000280578378478267	0.0201447576950425
Contig87657	#N/A	0.302426691896364	-21.5081940328541	5.92450971671422	-3.63037534940237	0.000283009357046903	0.0202883678958175
Contig80177	ref|XP_011706864.1| PREDICTED: alpha-tocopherol transfer protein-like [Wasmannia auropunctata]	0.280272359678073	-21.5358636694454	5.92920617997943	-3.63216643438095	0.000281051749712892	0.0201684962311745
Contig45821	#N/A	0.36885587326679	-21.5413130098501	5.92753593751322	-3.63410922125718	0.000278942686058346	0.0200375011245481
Contig45323	#N/A	0.33759357573816	-21.5462222755374	5.92597643619175	-3.63589401806393	0.00027701821388415	0.019960144093416
Contig122381	#N/A	0.521387703444989	-21.5590119848981	5.9101840326181	-3.64777337996832	0.000264522792528786	0.0191968551699742
Contig97102	ref|XP_394997.2| PREDICTED: general transcription factor IIH subunit 2 [Apis mellifera]	1.90458878779372	-21.5608320156719	3.35097771227712	-6.43419141126442	1.24132351008024e-10	9.74418266687822e-07
Contig64272	#N/A	0.501248034508288	-21.5783490714662	5.91706466724784	-3.6467996016516	0.000265526844151752	0.019240075127236
Contig31301	#N/A	0.338496448214824	-21.579881403754	5.92716961176331	-3.64084087638148	0.000271749057580063	0.0196405762603019
Contig34804	#N/A	1.00872269470396	-21.5799894762089	5.90898250392052	-3.65206521797804	0.000260139794286163	0.0189079076714259
Contig39582	#N/A	0.33322049370768	-21.617711634413	5.9275110780949	-3.64701328257339	0.000265306214715828	0.0192347575783216
Contig85353	#N/A	0.28554013101694	-21.6196253994541	5.92805332865916	-3.64700251513159	0.000265317328182119	0.0192347575783216
Contig60574	ref|XP_017042292.1| PREDICTED: chaperone protein ClpB-like, partial [Drosophila ficusphila]	1.06068543320639	-21.6215685991939	5.91393418256053	-3.65603808425079	0.000256143317648143	0.0186727444583977
Contig91362	#N/A	0.317982866260259	-21.6438308753712	5.91527185342421	-3.65897483863605	0.000253226198204699	0.0185005698695602
Contig51415	#N/A	0.365981223469981	-21.6441912200796	5.92380100588197	-3.65376743725662	0.000258420352962882	0.0188022763195655
Contig120706	#N/A	0.369630251328327	-21.6473257478533	5.9259614421691	-3.65296432639792	0.000259230257094788	0.0188514964676903
Contig95407	#N/A	0.473770922813169	-21.6514627547114	5.92248770216384	-3.6558054391233	0.000256375749303181	0.0186727444583977
Contig120711	#N/A	0.312831785802693	-21.6639404571289	5.92542174542042	-3.65610101489776	0.000256080478709023	0.0186727444583977
Contig43337	#N/A	0.453070332450509	-21.6905626029845	5.92026627729267	-3.66378159140902	0.000248518719727434	0.0181942743737447
Contig148387	#N/A	0.362906745283672	-21.6921929251361	5.92744992216278	-3.65961639659389	0.000252593089929977	0.0184638623010015
Contig148266	ref|XP_011870333.1| PREDICTED: exonuclease mut-7 homolog isoform X1 [Vollenhovia emeryi]	3.22400400432836	-21.6954187137832	5.44770490336932	-3.98248787307934	6.81976056212673e-05	0.00598145070233905
Contig84744	ref|XP_011052524.1| PREDICTED: activating signal cointegrator 1 complex subunit 1 isoform X1 [Acromyrmex echinatior]	1.09319528083515	-21.6988804786746	5.92251372989351	-3.66379572395939	0.00024850500087556	0.0181942743737447
Contig106871	ref|XP_012058062.1| PREDICTED: uncharacterized protein LOC105621200 [Atta cephalotes]	0.282550831801714	-21.7037047790571	5.92216120186702	-3.66482843665498	0.000247504438724776	0.018138814667269
Contig92174	ref|XP_002161180.1| PREDICTED: 60S ribosomal protein L44 [Hydra vulgaris]	0.703577580174532	-21.7078215268506	5.92605002708731	-3.66311816937531	0.000249163521525864	0.018232034231507
Contig95314	#N/A	0.442108051539442	-21.7236504558752	5.92355883070522	-3.66733091993093	0.000245095513657456	0.0179902653471468
Contig41729	ref|XP_012061542.1| PREDICTED: lymphocyte cytosolic protein 2-like [Atta cephalotes]	3.23135182920963	-21.724927441374	5.90732251445469	-3.67762677392594	0.000235414080652238	0.0173517492717367
Contig114294	#N/A	0.242238744582645	-21.7250208450319	5.92769118427439	-3.66500550883392	0.000247333259145944	0.0181356759302255
Contig63237	ref|XP_011049392.1| PREDICTED: pyroglutamylated RFamide peptide receptor-like isoform X1 [Acromyrmex echinatior]	0.920592587977742	-21.75991428081	5.90954905620098	-3.6821615446236	0.000231264784656767	0.0170994349961524
Contig123548	#N/A	0.859002638174008	-21.7766391006259	5.91372195226734	-3.68239144085506	0.000231056269463274	0.0170960815689781
Contig79673	ref|XP_011058246.1| PREDICTED: mitochondrial import inner membrane translocase subunit Tim22 [Acromyrmex echinatior]	0.608820591139665	-21.7863522235403	5.92158686217432	-3.67914086724055	0.000234020985297715	0.0172670825898753
Contig18031	#N/A	0.383248142196478	-21.8053168058014	5.92006661314222	-3.68328909634138	0.000230243786882193	0.0170596519953294
Contig79431	#N/A	0.484828003731583	-21.817515914321	5.91222161764045	-3.69023986672345	0.000224042693654382	0.0166789043652704
Contig79814	#N/A	0.586317809517135	-21.8257233297215	5.90495699214222	-3.69616973650532	0.000218876667045277	0.0163806231056656
Contig148930	ref|XP_011156876.1| PREDICTED: cytochrome P450 4C1-like [Solenopsis invicta]	0.786184051210812	-21.8263877067051	5.91510664229055	-3.6899398483631	0.000224307083861523	0.0166897935905116
Contig59617	#N/A	0.438797104458951	-21.8460997593576	5.91954952989067	-3.69050037490963	0.000223813358971646	0.016670614750984
Contig115115	#N/A	0.40505465362251	-21.8656783366003	5.92204006119372	-3.69225437698116	0.000222274975526668	0.016582253018475
Contig109391	ref|XP_011871004.1| PREDICTED: OTU domain-containing protein 4-like isoform X1 [Vollenhovia emeryi]	0.307206038910752	-21.86981185015	5.92376965868889	-3.6918741123014	0.000222607649298327	0.0165983076638025
Contig66849	ref|XP_011876399.1| PREDICTED: ras-related protein Rab-32 isoform X2 [Vollenhovia emeryi]	0.737886222146308	-21.8761300567774	5.9143382530227	-3.6988297119457	0.000216595852931855	0.0162604778031466
Contig24364	ref|XP_011866808.1| PREDICTED: collagen alpha-2(IV) chain-like isoform X2 [Vollenhovia emeryi]	0.529201598067012	-21.8863042827753	5.92029424726626	-3.69682711174052	0.000218310907676506	0.0163556078059211
Contig117290	ref|XP_011870716.1| PREDICTED: uncharacterized protein LOC105563606 [Vollenhovia emeryi]	1.30184230455422	-21.8888747944304	5.91890260328006	-3.69813059304275	0.000217193145643488	0.0162804986206833
Contig138612	#N/A	0.310901777316553	-21.8939728286957	5.92848763203332	-3.69301147064832	0.000221614022843512	0.0165591732341193
Contig114722	ref|XP_011866087.1| PREDICTED: uncharacterized protein LOC105561048 [Vollenhovia emeryi]	0.319081292542466	-21.9096200990587	5.92426223352577	-3.6982866786468	0.00021705965985983	0.0162791288530862
Contig147079	ref|XP_003424241.1| PREDICTED: uncharacterized protein LOC100679579 [Nasonia vitripennis]	1.4412778598749	-21.9674751946177	5.90878794251062	-3.71776333968144	0.000200994425598928	0.015187117301525
Contig84938	#N/A	0.535982631808321	-21.975217219166	5.92138327559946	-3.71116278010923	0.000206309375971666	0.0155305785277936
Contig103953	ref|XP_012058253.1| PREDICTED: probable maleylacetoacetate isomerase 2 [Atta cephalotes]	5.03590822520039	-21.9759784140443	5.88853561877872	-3.73199379892722	0.000189970179222582	0.0144546130391024
Contig144540	ref|XP_011875813.1| PREDICTED: WD repeat-containing protein 60 isoform X1 [Vollenhovia emeryi]	0.264879286906067	-22.0074575617624	5.92372847206302	-3.7151361115811	0.000203094342274413	0.0153293917095875
Contig86456	#N/A	0.345037232581106	-22.0085863707625	5.92547776217622	-3.71422984847715	0.000203823477499584	0.0153762124400741
Contig352	#N/A	2.50213272456272	-22.0216676646931	5.90518281096855	-3.72921014803963	0.000192080913508255	0.0145838027060591
Contig51432	ref|XP_015124375.1| PREDICTED: uncharacterized protein LOC107046295 [Diachasma alloeum]	0.610326394183074	-22.0570355903947	5.91441342230388	-3.72936993332513	0.000191959160705212	0.0145823943710561
Contig60738	#N/A	0.338665507961	-22.0586428858137	5.92366659593301	-3.72381573617908	0.000196234174366665	0.014875161016892
Contig39457	#N/A	0.583802985452061	-22.0742205742037	5.91576266982809	-3.73142429915045	0.00019040022698529	0.0144795376062113
Contig94144	#N/A	1.17471850586682	-22.084667235381	5.91296550648496	-3.73495620956354	0.000187747853667436	0.0143163564380182
Contig93665	ref|XP_009167041.1| hypothetical protein T265_04119 [Opisthorchis viverrini]	0.444797199529093	-22.0882168505894	5.92674124678005	-3.72687383013216	0.000193869444253102	0.0147037954184813
Contig106503	ref|XP_011069309.1| PREDICTED: F-box/WD repeat-containing protein 9-like [Acromyrmex echinatior]	0.324078812001009	-22.0927451876579	5.92777969235744	-3.72698486351333	0.000193784091420033	0.0147037954184813
Contig118430	ref|XP_011173487.1| PREDICTED: vacuolar protein sorting-associated protein 16 homolog [Solenopsis invicta]	4.67364545365502	-22.1086811108181	5.88367794054629	-3.75762938322307	0.000171530681466217	0.0132731493423505
Contig115668	#N/A	0.471257722346098	-22.1176449020582	5.9121307751714	-3.74106151287172	0.000183244660493694	0.014001710725419
Contig90984	ref|XP_011878780.1| PREDICTED: uncharacterized protein LOC105568033 [Vollenhovia emeryi]	0.375574244497068	-22.1336081834721	5.92301263770815	-3.73688349786071	0.000186315195835966	0.0142147830594139
Contig102497	ref|XP_015523501.1| PREDICTED: uncharacterized protein LOC107227008 [Neodiprion lecontei]	10.3652107344618	-22.1609769268946	5.9154211536856	-3.74630585906588	0.000179457768410663	0.0137639449950819
Contig94463	#N/A	0.371188488942323	-22.1655099580634	5.91385722408813	-3.7480630860988	0.000178205437071504	0.0136921662000502
Contig75543	#N/A	0.416108024008534	-22.1836374221758	5.91572946726387	-3.74994116024649	0.00017687606826573	0.0136345105388668
Contig65463	#N/A	0.346949151796257	-22.2002924877851	5.92478333490748	-3.74702182896478	0.000178946519104497	0.0137416338640805
Contig66248	ref|XP_011689025.1| PREDICTED: luciferin 4-monooxygenase-like [Wasmannia auropunctata]	0.596634128751642	-22.2018024736607	5.92105894718329	-3.74963375161505	0.000177093023037108	0.0136437910992771
Contig3223	#N/A	1.12560306376837	-22.2029264765042	5.91668126651084	-3.75259803197031	0.000175011358598037	0.0135202733383416
Contig150174	ref|XP_012541096.1| PREDICTED: follistatin-related protein 5 isoform X1 [Monomorium pharaonis]	0.295262857861096	-22.2254799239706	5.9264633713553	-3.75020961597338	0.000176686809110576	0.0136273559317124
Contig147873	ref|XP_008218055.1| PREDICTED: uncharacterized protein LOC103318189 isoform X2 [Nasonia vitripennis]	0.37242079721959	-22.247161549806	5.92100717456974	-3.75732724077008	0.000171737851722323	0.0132819065324626
Contig72260	#N/A	0.317902219918901	-22.2760666646504	5.92489195374554	-3.75974226003702	0.000170088499453694	0.0131687642231828
Contig141540	ref|XP_011868784.1| PREDICTED: cytochrome b5 reductase 4 isoform X1 [Vollenhovia emeryi]	3.15675571292567	-22.2847071700417	5.89426050361504	-3.7807469073303	0.000156358565081201	0.0122195775278089
Contig39061	ref|XP_011873030.1| PREDICTED: radial spoke head protein 3 homolog isoform X2 [Vollenhovia emeryi]	0.799559239369753	-22.2872073266462	5.90623865227394	-3.77350267044585	0.000160971495589563	0.0125246637733031
Contig8289	#N/A	0.815741431389617	-22.3045939249421	5.92367472432272	-3.76533063730846	0.000166328834910243	0.0128918076721407
Contig31489	#N/A	0.513622856308695	-22.3144741987985	5.91158781430633	-3.77470062185262	0.000160199937999097	0.0124990450797672
Contig61726	#N/A	1.80554338390236	-22.3298393269545	5.69975142856546	-3.91768651787935	8.94028651002784e-05	0.007523738314517
Contig139021	#N/A	0.840294328061923	-22.3351721756293	5.92016455739087	-3.77272826778869	0.000161472119956184	0.0125497943528322
Contig73798	ref|XP_011165969.1| PREDICTED: cohesin subunit SA-2-like [Solenopsis invicta]	1.61843153726226	-22.3564498110212	5.8926912303776	-3.79392860358452	0.000148282327526019	0.0116853586349381
Contig145273	#N/A	0.257903030116513	-22.3760181354142	5.92885125401865	-3.77408998416809	0.000160592791973359	0.0125089744914331
Contig78579	#N/A	0.641320683729006	-22.3830335924167	5.92346758721685	-3.77870449409067	0.00015764636480113	0.0123066068548648
Contig101308	ref|XP_011705267.1| PREDICTED: cytochrome P450 4C1-like, partial [Wasmannia auropunctata]	0.904875217840233	-22.3900359852547	4.39810617869482	-5.09083570872297	3.56488809709078e-07	6.27549146314202e-05
Contig81761	#N/A	0.427705418148137	-22.3926871929375	5.91709941118055	-3.78440273466181	0.000154078149673695	0.0120491854837321
Contig104734	#N/A	0.707886095286966	-22.4157824731368	5.9173258152637	-3.78816093163494	0.000151766535565886	0.0119001976558563
Contig142754	ref|XP_011859349.1| PREDICTED: uncharacterized protein LOC105556847 [Vollenhovia emeryi]	0.749070693339622	-22.4403819361656	5.9151211499475	-3.79373158508592	0.000148400092180759	0.011688120303715
Contig103636	ref|XP_011872992.1| PREDICTED: neurofilament medium polypeptide isoform X5 [Vollenhovia emeryi]	0.210275557382089	-22.4574206135326	5.93209968277683	-3.78574565743309	0.000153248357494272	0.0120030671667783
Contig52458	#N/A	0.411566375675363	-22.4579898317227	5.9278296150212	-3.78856871574274	0.000151517686167683	0.0118938858346862
Contig31003	ref|XP_011871564.1| PREDICTED: uncharacterized protein LOC105564074 [Vollenhovia emeryi]	0.674090646053699	-22.4708262583272	5.38430172895642	-4.17339654972912	3.00091953649837e-05	0.00289631781249051
Contig49069	#N/A	0.594045457722615	-22.4789068459928	5.90927094144591	-3.80400680028601	0.000142374268714214	0.0112637497460875
Contig142589	ref|XP_011696169.1| PREDICTED: leukotriene A-4 hydrolase [Wasmannia auropunctata]	0.44401392022733	-22.4839328470752	5.92310714047685	-3.79596929682841	0.000147067700494182	0.0116025822873961
Contig61491	ref|XP_017023551.1| PREDICTED: cyclopentanol dehydrogenase-like [Drosophila kikkawai]	0.979419053154795	-22.4903634693626	5.91741529887301	-3.80070729084132	0.000144283659602171	0.0113893006987754
Contig114588	ref|XP_011862943.1| PREDICTED: CD59 glycoprotein-like [Vollenhovia emeryi]	37.495750337881	-22.5006696573749	5.91956039775239	-3.80107105012701	0.000144071979305225	0.0113789482727168
Contig47091	#N/A	0.653749697559055	-22.5053222221979	5.91366055805675	-3.80564998637548	0.000141432275317418	0.0111954936725631
Contig64192	ref|XP_012542497.1| PREDICTED: uncharacterized protein LOC105840177 [Monomorium pharaonis]	0.374213875864873	-22.5323559513937	5.92582623130128	-3.80239903633586	0.000143301672263769	0.0113244386945491
Contig102835	ref|XP_011873615.1| PREDICTED: vinculin isoform X5 [Vollenhovia emeryi]	1.00853724228986	-22.5424456962921	5.90870395701842	-3.81512525593974	0.000136113873822024	0.0108108386899553
Contig62890	ref|XP_012249030.1| PREDICTED: uncharacterized protein LOC105681967 [Bombus impatiens]	0.659027437673856	-22.5509878915962	5.91666955399989	-3.81143271324844	0.000138163666405199	0.0109490249983485
Contig73042	ref|XP_011865553.1| PREDICTED: uncharacterized protein LOC105560767, partial [Vollenhovia emeryi]	0.428550610096337	-22.5530163973695	5.9244104375224	-3.80679506175491	0.000140779309057089	0.0111500527084302
Contig82299	#N/A	0.760838935042408	-22.6052026577532	5.91810525495251	-3.81966891157203	0.000133630924125301	0.0106615746392618
Contig52700	#N/A	0.487981579519554	-22.6354678711972	5.9237700482746	-3.82112534530103	0.000132844108383526	0.0106288074644774
Contig78921	ref|XP_011161160.1| PREDICTED: solute carrier family 28 member 3 isoform X1 [Solenopsis invicta]	3.79230123397746	-22.6451997121789	5.16278149173128	-4.38624019793352	1.15326764550115e-05	0.00122798235498399
Contig80639	#N/A	0.428377445475174	-22.6640858020706	5.92703988751301	-3.82384566869862	0.000131386173214262	0.0105181145136859
Contig36314	#N/A	0.474166574259556	-22.6756215775309	5.924013197251	-3.82774663433453	0.000129321775339494	0.0103763650710644
Contig137534	ref|XP_011638785.1| PREDICTED: cytochrome P450 4C1-like [Pogonomyrmex barbatus]	0.477593908446428	-22.684131253074	5.91138786241831	-3.837361340691	0.000124363413285007	0.0100240600153632
Contig7508	ref|XP_011870716.1| PREDICTED: uncharacterized protein LOC105563606 [Vollenhovia emeryi]	0.901451455255227	-22.6858886943294	5.90972218637374	-3.83874029588685	0.000123667148964367	0.00997932447014169
Contig77059	#N/A	0.931453660846357	-22.6872633667442	5.91560304010233	-3.8351564858131	0.000125484375202673	0.0101028864746508
Contig82333	#N/A	0.341742103032348	-22.6882942560225	5.92003197788006	-3.83246143615377	0.000126867491483569	0.0102084259363063
Contig101455	ref|XP_012538239.1| PREDICTED: UPF0160 protein MYG1, mitochondrial isoform X3 [Monomorium pharaonis]	6.12505833163097	-22.7879729845413	5.92562000363298	-3.84566897144435	0.000120223981200796	0.00972369082525982
Contig119544	#N/A	0.702483848656326	-22.7900243525047	5.91086600885318	-3.85561511940387	0.000115438990046079	0.00936348046873758
Contig97828	ref|XP_011636609.1| PREDICTED: uncharacterized protein LOC105426894 isoform X1 [Pogonomyrmex barbatus]	0.976440693998128	-22.8047684941868	5.8979809100826	-3.86653820042076	0.000110391179192929	0.00901615170313482
Contig104749	#N/A	0.312942051616374	-22.814817616299	5.92880015490708	-3.84813402715487	0.000119020935704658	0.00963190214906131
Contig71706	#N/A	0.568102582471132	-22.8197332023135	5.91198258579158	-3.8599121142807	0.000113427812373286	0.00921622173945266
Contig82044	ref|XP_015918911.1| PREDICTED: uncharacterized protein LOC107448283 [Parasteatoda tepidariorum]	0.556583323043008	-22.8217580890793	5.90958417274352	-3.86182130958367	0.000112544872345463	0.00916054697850882
Contig92276	ref|XP_003494250.1| PREDICTED: bifunctional aspartokinase/homoserine dehydrogenase 1, chloroplastic-like [Bombus impatiens]	0.797979804515368	-22.8552679385897	5.92339807196744	-3.8584723938701	0.000114097952552838	0.00926002205735692
Contig62813	ref|XP_015930380.1| PREDICTED: lysosomal protective protein-like [Parasteatoda tepidariorum]	3.84768914126761	-22.8629968971503	4.41829750068807	-5.17461689566847	2.28379091975732e-07	6.27549146314202e-05
Contig14372	ref|XP_012062510.1| PREDICTED: replication factor C subunit 1 [Atta cephalotes]	2.79555376355209	-22.8859241397784	5.08286238436354	-4.50256615449251	6.71378467160396e-06	0.000755886559955079
Contig58131	#N/A	0.429692012816755	-22.8970719076457	5.9216649481877	-3.86666116843595	0.000110335556478108	0.00901615170313482
Contig88368	#N/A	0.368407418470376	-22.9040945204887	5.92575433467744	-3.86517787051248	0.000111008271337267	0.00905608297640985
Contig133980	#N/A	0.486285259710199	-22.9077350771161	5.63676778000437	-4.0639841787306	4.82420972777659e-05	0.00444648637903229
Contig69302	ref|XP_011566715.1| PREDICTED: probable sulfate/thiosulfate import ATP-binding protein CysA [Plutella xylostella]	1.0382977555071	-22.9218079043491	5.91766295071833	-3.87345614227095	0.000107302723936452	0.00878930607770947
Contig59695	ref|XP_015127114.1| PREDICTED: uncharacterized protein LOC107048461 [Diachasma alloeum]	0.69793067046689	-22.9281551194012	5.91915084689429	-3.87355479062193	0.000107259278615876	0.00878930607770947
Contig80703	#N/A	2.51368137764517	-22.9373890564247	5.90681657177731	-3.88320659321288	0.000103087907740808	0.00848340832851071
Contig134456	ref|XP_011161570.1| PREDICTED: solute carrier family 2, facilitated glucose transporter member 8 [Solenopsis invicta]	0.47011944084635	-22.9388704686912	5.91137547211438	-3.88046243668675	0.000104258046677604	0.00855479048862106
Contig104545	#N/A	4.59424196726219	-22.9627487435255	5.91311492635083	-3.88335911436387	0.00010302323599827	0.00848302690958483
Contig40110	ref|XP_011639712.1| PREDICTED: F-box/WD repeat-containing protein 9-like isoform X2 [Pogonomyrmex barbatus]	0.744680879128102	-22.9693016665649	5.91246699159452	-3.88489300645895	0.000102374963378131	0.00844902624480791
Contig121868	ref|XP_014240031.1| PREDICTED: protein transport protein Sec61 subunit gamma [Cimex lectularius]	0.657013117501522	-22.9826457802998	5.90605552544336	-3.89136974437342	9.96798971446318e-05	0.00825100786575573
Contig94070	#N/A	0.372191844889779	-22.9843247378166	5.9237230207417	-3.88004716921061	0.000104436209558459	0.00856443592686103
Contig87890	ref|XP_011164130.1| PREDICTED: lipoyl synthase, mitochondrial-like [Solenopsis invicta]	1.88526402943988	-23.0056695208343	5.90002172716747	-3.89925166121024	9.64904454918996e-05	0.00801046443987599
Contig28675	#N/A	0.282670108415659	-23.0147148188881	5.9284727060329	-3.88206473405334	0.000103573295413813	0.00851343567311546
Contig98887	#N/A	0.420696417191145	-23.0539527704419	5.92009801539902	-3.8941843041239	9.85297176953647e-05	0.00816058236881709
Contig101582	ref|XP_011865163.1| PREDICTED: putative protein MSS51 homolog, mitochondrial [Vollenhovia emeryi]	0.613762899954121	-23.0699191464708	5.90900681537345	-3.9041957248128	9.45392502895741e-05	0.00787160427116438
Contig5085	#N/A	1.15559308434176	-23.082235222778	4.89338439435845	-4.71702882148179	2.39313799846761e-06	0.000291001049715558
Contig118395	ref|XP_011860024.1| PREDICTED: uncharacterized protein LOC105557392 isoform X5 [Vollenhovia emeryi]	0.509336225809801	-23.1030346865901	5.91465848615035	-3.90606401716815	9.38116684711782e-05	0.00782947862963501
Contig48139	ref|XP_013309372.1| Actin [Necator americanus]	2.04960731096923	-23.1134664899613	5.91013839048945	-3.91081645857148	9.1984653850221e-05	0.00770887048343694
Contig123036	ref|XP_011880646.1| PREDICTED: CAS1 domain-containing protein 1 [Vollenhovia emeryi]	3.7868712932003	-23.11559287756	5.34064582110137	-4.32823925268143	1.50306141761292e-05	0.00156160344944451
Contig81493	#N/A	0.697550133284333	-23.1221263092887	5.9096099967139	-3.91263151411784	9.12957890903464e-05	0.00766022631300396
Contig87966	#N/A	0.709845718031217	-23.125767192462	5.9146853350888	-3.90988968682217	9.23382803148357e-05	0.00772019052878423
Contig41584	ref|XP_011171771.1| PREDICTED: gamma-tubulin complex component 2 homolog [Solenopsis invicta]	0.253405703919539	-23.1285802443549	5.92687154853211	-3.90232520731499	9.52730347075849e-05	0.00792336314601391
Contig130296	#N/A	0.44089798447073	-23.1414628358709	5.92720601794408	-3.90427846877808	9.45069142831024e-05	0.00787160427116438
Contig94086	ref|XP_011705084.1| PREDICTED: probable elongator complex protein 3 [Wasmannia auropunctata]	0.39598853610307	-23.1488297635768	5.9268580952308	-3.90575063408454	9.39333411304434e-05	0.007835005490973
Contig90290	#N/A	0.90418235435273	-23.1675616503252	5.37927190680146	-4.30682108131261	1.65617462940877e-05	0.00169574280153312
Contig62527	#N/A	0.813297835034794	-23.1923286161203	5.91844458336354	-3.91865266109153	8.90453240810868e-05	0.00749811511125466
Contig107370	#N/A	0.854363081326894	-23.1925388892751	5.91083265330877	-3.92373464951548	8.71867637694835e-05	0.00735691359376582
Contig31814	#N/A	0.609178309788871	-23.2243423195524	5.92027899616045	-3.92284592239899	8.75091180848431e-05	0.00737315197259039
Contig30638	ref|XP_011863791.1| PREDICTED: G-protein coupled receptor Mth2-like isoform X1 [Vollenhovia emeryi]	0.359199320025168	-23.2574290700339	5.91966095701237	-3.92884478332892	8.53549076362033e-05	0.00724347890947304
Contig86211	ref|XP_011873842.1| PREDICTED: transcription factor SPT20 homolog isoform X1 [Vollenhovia emeryi]	0.65883047213245	-23.2643263840806	5.31556614465726	-4.37664131175638	1.20522064716785e-05	0.00128136991559726
Contig143810	#N/A	0.445695861903002	-23.3062356805346	5.92283403820181	-3.93498037091893	8.3203496002161e-05	0.00707790751030545
Contig41001	ref|XP_013175214.1| PREDICTED: protein turtle-like [Papilio xuthus]	1.46634625994284	-23.3065278433397	5.90746524202474	-3.94526702883342	7.97110991211015e-05	0.00683016323378671
Contig84725	ref|XP_012525636.1| PREDICTED: putative gustatory receptor 28a [Monomorium pharaonis]	1.84560224638666	-23.345393495031	5.75443137476721	-4.05694185482844	4.97194535527027e-05	0.00455295504124189
Contig51725	#N/A	0.298266649889637	-23.3526588929233	5.92595849256625	-3.94073953137163	8.12307920100899e-05	0.00693933930994539
Contig81996	#N/A	4.93658250137439	-23.3602433525801	5.87235319646866	-3.97800380376095	6.9496260289505e-05	0.00608025578335987
Contig126399	ref|XP_011707009.1| PREDICTED: calcium and integrin-binding family member 3-like, partial [Wasmannia auropunctata]	0.307862688271608	-23.3664241043305	5.92038252530362	-3.94677607476591	7.92105753148342e-05	0.00679964560161611
Contig26801	#N/A	0.749853112094724	-23.4172280915506	5.90501639661624	-3.96564996923115	7.31962127697479e-05	0.00635673342085253
Contig113180	ref|XP_011704852.1| PREDICTED: phosphoribosylformylglycinamidine synthase-like, partial [Wasmannia auropunctata]	0.639356064164432	-23.4246201151299	5.91658337963115	-3.95914645532981	7.52181026696109e-05	0.00650434042405631
Contig17117	ref|XP_012521425.1| PREDICTED: major facilitator superfamily domain-containing protein 6-like [Monomorium pharaonis]	0.867412834931956	-23.4344281160986	5.91069588996103	-3.96474942246658	7.34730866799995e-05	0.0063768591699164
Contig86369	ref|XP_016842819.1| PREDICTED: uncharacterized protein LOC107981417 [Nasonia vitripennis]	0.623589762728387	-23.4503677077923	5.92275066455952	-3.9593710821079	7.51473960485036e-05	0.00650220552324888
Contig98641	ref|XP_011168661.1| PREDICTED: tectonin beta-propeller repeat-containing protein isoform X2 [Solenopsis invicta]	2.06559534704828	-23.4549893176155	5.90948787987479	-3.96903924576835	7.21629971998367e-05	0.0062747169325202
Contig49950	#N/A	0.331826593601602	-23.4594443098326	5.92731115735804	-3.95785604754535	7.56255095632499e-05	0.00652758559850857
Contig18690	ref|XP_011685485.1| PREDICTED: uncharacterized protein LOC105448537 [Wasmannia auropunctata]	1.41845800663194	-23.4671625715942	5.69936467051023	-4.1175050077105	3.82996209883265e-05	0.00361739408207725
Contig33665	#N/A	0.255839271243599	-23.4761918590655	5.92846030052984	-3.95991381724651	7.49768165647299e-05	0.00649938604303475
Contig20109	#N/A	0.940587799059959	-23.5196466756771	4.24236120432707	-5.54399909458154	2.95640363137627e-08	6.27549146314202e-05
Contig26458	#N/A	0.878092663783322	-23.5229270376485	5.91560502020827	-3.97641947988277	6.9960672375394e-05	0.006101995755942
Contig41715	ref|XP_011155821.1| PREDICTED: protein amalgam-like isoform X2 [Solenopsis invicta]	0.876490033502644	-23.5386867802289	5.91928155169513	-3.97661212338989	6.99040464822628e-05	0.006101995755942
Contig13485	ref|XP_005113004.1| PREDICTED: elongation factor 1-alpha [Aplysia californica]	1.10286175245959	-23.5516967286139	5.92265926380705	-3.97654088806638	6.99249804353098e-05	0.006101995755942
Contig147601	ref|XP_011862140.1| PREDICTED: 43 kDa receptor-associated protein of the synapse homolog isoform X3 [Vollenhovia emeryi]	0.622375206077721	-23.5529897943204	5.42101893438807	-4.34475327966718	1.3943228401714e-05	0.00146261049998291
Contig109736	#N/A	0.412426667941306	-23.5600996118227	5.91961523992978	-3.98000522954633	6.89137522259178e-05	0.00603340290027696
Contig24190	#N/A	0.507127534642401	-23.5661690223774	5.91769114638378	-3.98232493711307	6.82443896011311e-05	0.0059818408917314
Contig119909	ref|XP_011170369.1| PREDICTED: uncharacterized protein LOC105203292 [Solenopsis invicta]	1.38087167943315	-23.56671839457	5.90552135966533	-3.99062452902643	6.58995368302994e-05	0.00579719066140303
Contig129472	ref|XP_011164368.1| PREDICTED: synembryn [Solenopsis invicta]	1.04623931110184	-23.5775201870294	5.9065049533517	-3.99178877749862	6.55767698742206e-05	0.00577308464356246
Contig96592	#N/A	2.04049572779368	-23.5916044547318	5.14966799729832	-4.5811894023282	4.62338876164204e-06	0.000535468001519455
Contig134554	#N/A	0.465522780683403	-23.6015932075403	5.92045893538678	-3.98644656860514	6.70702230005159e-05	0.00588622440950553
Contig72550	ref|XP_011866071.1| PREDICTED: uncharacterized protein LOC105561039 [Vollenhovia emeryi]	0.663656666638442	-23.6058560565484	5.90723235189105	-3.99609405053986	6.43961589648922e-05	0.00568686504578898
Contig34285	#N/A	0.373785451627154	-23.6087792647547	5.91832373599514	-3.98909899456269	6.63247399696073e-05	0.00582441689464611
Contig10254	ref|XP_011860090.1| PREDICTED: DNA endonuclease RBBP8-like [Vollenhovia emeryi]	0.59015612998915	-23.6228389455944	5.91363722637111	-3.9946378246287	6.47932216385211e-05	0.00571835592620744
Contig66729	#N/A	0.463595842331955	-23.6452247641685	5.92537094956516	-3.99050539880609	6.59326482011272e-05	0.00579719066140303
Contig68724	#N/A	0.82979146159678	-23.658178297471	5.90652537837605	-4.00543073667037	6.19045717292022e-05	0.00551161327764404
Contig41144	ref|XP_011173491.1| PREDICTED: transient receptor potential cation channel protein painless-like [Solenopsis invicta]	0.490536136315563	-23.6791537523138	5.9173582040101	-4.00164278313706	6.29042173176148e-05	0.00557949320592793
Contig97879	#N/A	54.4950881303616	-23.6922406881809	4.82727397998453	-4.90799585571831	9.20117984508346e-07	0.000120268187656869
Contig71717	ref|XP_011859950.1| PREDICTED: uncharacterized protein LOC105557346 [Vollenhovia emeryi]	0.665959424079736	-23.6955131574065	5.91170169898269	-4.00823897482584	6.1173202329165e-05	0.00545336906593314
Contig116692	ref|XP_011703269.1| PREDICTED: DNA mismatch repair protein Msh2 [Wasmannia auropunctata]	1.17750934517599	-23.6976767595857	5.90998884510027	-4.00976674926086	6.07787569179904e-05	0.0054216262728796
Contig36914	#N/A	13.69413888109	-23.6993814416292	5.73044254781601	-4.13569828924671	3.53876890094102e-05	0.00336485484115925
Contig13189	#N/A	1.60266138713103	-23.7199866459255	5.91025585133413	-4.01336037602689	5.98604164962024e-05	0.00534984014526497
Contig114115	#N/A	0.866184761547246	-23.7409106195223	5.89153739558241	-4.02966306168637	5.58568581731637e-05	0.0050398508871606
Contig76723	ref|XP_011702375.1| PREDICTED: protein SPT2 homolog isoform X2 [Wasmannia auropunctata]	2.22788462417359	-23.7576056789788	5.90600081356525	-4.02262147076088	5.75539544258931e-05	0.00517644882146112
Contig97892	#N/A	0.943981428224859	-23.7628878555611	5.92291682138609	-4.01202457710694	6.02002308421431e-05	0.00537680911333899
Contig121449	#N/A	0.322080946936002	-23.781087918645	5.91945350771198	-4.01744652401823	5.88321804791892e-05	0.00527462601850761
Contig32561	#N/A	1.56338994949089	-23.7925673978232	5.91558138682159	-4.02201674561135	5.77019544904708e-05	0.00518645869188298
Contig137407	ref|XP_011858099.1| PREDICTED: uncharacterized protein LOC105555682 isoform X2 [Vollenhovia emeryi]	0.758756610204235	-23.8345066053288	5.91334119358152	-4.03063273791801	5.56269038463073e-05	0.00502230966950267
Contig119690	ref|XP_012532458.1| PREDICTED: uncharacterized protein LOC105834482 [Monomorium pharaonis]	1.32515574378938	-23.8401544023857	5.90806910119614	-4.0351854377531	5.45591900955473e-05	0.00493537124387359
Contig5726	#N/A	3.63095510014652	-23.8436542394029	3.79445120358749	-6.28382154891326	3.30349888596675e-10	1.86709792836178e-06
Contig126880	ref|XP_011688014.1| PREDICTED: leucine-rich repeat-containing protein 49 isoform X1 [Wasmannia auropunctata]	10.0261125038651	-23.8447274080493	5.89848426067781	-4.04251776460775	5.28803048857978e-05	0.00480812640891156
Contig89349	ref|XP_011068010.1| PREDICTED: cytosolic carboxypeptidase 1-like isoform X4 [Acromyrmex echinatior]	0.960641367416784	-23.8730309628712	5.91066936095393	-4.03897249279028	5.36858598756528e-05	0.0048719659234747
Contig33413	#N/A	0.634154589843959	-23.8972023604	5.91656916458625	-4.03903033931171	5.36726232053637e-05	0.0048719659234747
Contig52155	ref|XP_008178499.1| PREDICTED: uncharacterized protein K02A2.6-like [Acyrthosiphon pisum]	0.704038233683089	-23.9218940822482	5.91850328131597	-4.04188237214751	5.30238309059099e-05	0.00481807603569926
Contig138344	#N/A	0.315791999041527	-23.9449792027447	5.922123691527	-4.04330953725328	5.27019699900123e-05	0.00479499694377255
Contig87259	ref|XP_003484469.1| PREDICTED: translationally-controlled tumor protein homolog [Bombus impatiens]	1.45121291181771	-23.9523400313845	5.9161349865324	-4.04864663938704	5.15146535635549e-05	0.00469907424439614
Contig86892	ref|XP_011875324.1| PREDICTED: uncharacterized protein LOC105566156 isoform X2 [Vollenhovia emeryi]	0.333851171794017	-23.9544530642957	5.92231710408349	-4.04477717813843	5.23729121583304e-05	0.00476812845955903
Contig26258	ref|XP_011879644.1| PREDICTED: uncharacterized protein LOC105568521, partial [Vollenhovia emeryi]	1.77175088087395	-23.9592775271814	5.70621567168463	-4.19880335860281	2.68329205175253e-05	0.0026147663243895
Contig41611	ref|XP_011684841.1| PREDICTED: FAD synthase-like isoform X1 [Wasmannia auropunctata]	1.95913582600987	-23.9616019855849	5.90672177876526	-4.05666677440728	4.97780220431918e-05	0.00455536604963528
Contig141629	ref|XP_011879293.1| PREDICTED: uncharacterized protein LOC105568321, partial [Vollenhovia emeryi]	0.435357690691022	-23.9983975331181	5.91383579889527	-4.05800876946923	4.94929098318738e-05	0.00454398939604566
Contig53683	#N/A	0.349085477128442	-24.0173702610237	5.92479814574206	-4.05370270348942	5.0413277275743e-05	0.004607532237536
Contig77787	ref|XP_012540252.1| PREDICTED: probable oligoribonuclease [Monomorium pharaonis]	2.71100988101174	-24.0298744872848	5.89068219060948	-4.07930248309637	4.51710304556488e-05	0.00419076237051333
Contig33773	ref|XP_012062013.1| PREDICTED: CXXC-type zinc finger protein 1-like [Atta cephalotes]	0.410635750806644	-24.0542897442257	5.91816593084753	-4.06448383254116	4.81388754292346e-05	0.00443986859107347
Contig76779	ref|XP_011862944.1| PREDICTED: uncharacterized protein LOC105559342 [Vollenhovia emeryi]	184.396871510944	-24.096409424688	5.90928256510695	-4.07772164542818	4.54791677302342e-05	0.0042165813404061
Contig13300	ref|XP_014238399.1| PREDICTED: 60S ribosomal protein L11-like [Trichogramma pretiosum]	0.985184473022416	-24.1201935712845	5.90706727022009	-4.08327727921504	4.44049865999319e-05	0.00413326178630473
Contig89656	#N/A	0.761990428719844	-24.1323906143042	5.92199289222246	-4.07504552158414	4.60053468708224e-05	0.00425977555491913
Contig51137	ref|XP_012234496.1| PREDICTED: uncharacterized protein LOC105679183 isoform X1 [Linepithema humile]	1.35606025033987	-24.1511278758984	5.88980055235569	-4.10050012071103	4.12258220967461e-05	0.00386535168201986
Contig85606	#N/A	0.359474514644655	-24.1617418434014	5.92158919782911	-4.08027997826314	4.49814886418278e-05	0.00417866495767544
Contig68066	ref|XP_014480439.1| PREDICTED: uncharacterized protein LOC106747441 isoform X2 [Dinoponera quadriceps]	0.405164421127609	-24.2035230110341	5.91928424968181	-4.08892730777969	4.33372624416412e-05	0.00404453445919192
Contig77474	ref|XP_011876068.1| PREDICTED: protein piccolo-like [Vollenhovia emeryi]	1.07349795290509	-24.2185742191826	5.9200797774538	-4.09092024594286	4.29664881231516e-05	0.00401523536530221
Contig68135	ref|XP_011861649.1| PREDICTED: UDP-glucuronosyltransferase 2B1-like [Vollenhovia emeryi]	0.448552328698133	-24.2545390960721	5.9096837556678	-4.10420254261666	4.05711907833754e-05	0.00380902826851734
Contig93410	#N/A	0.461808458252822	-24.3136685714173	5.91142780746463	-4.11299424831262	3.90560120235799e-05	0.00367899822059718
Contig54232	ref|XP_011865391.1| PREDICTED: uncharacterized protein KIAA0556-like isoform X1 [Vollenhovia emeryi]	2.16974407334818	-24.3452924509761	5.44321175377256	-4.47259697991778	7.72753351375557e-06	0.000859745907789858
Contig31281	#N/A	0.3460240698561	-24.3679220009298	5.92334125041301	-4.11388116449153	3.89061777194763e-05	0.00366977716503928
Contig109064	#N/A	0.329996319880039	-24.3712088844238	5.92526399186405	-4.11310093826837	3.90379590448083e-05	0.00367899822059718
Contig49468	ref|XP_011867631.1| PREDICTED: transmembrane 7 superfamily member 3-like [Vollenhovia emeryi]	1.12728248465719	-24.3786278615039	5.91156613808994	-4.12388651197274	3.72532498533701e-05	0.00352091802309808
Contig21716	#N/A	901.914686646386	-24.3820468891343	3.98801702534182	-6.11382718132815	9.72696417719239e-10	4.74003445085198e-06
Contig139974	ref|XP_011696328.1| PREDICTED: glutamate receptor ionotropic, kainate 2-like isoform X3 [Wasmannia auropunctata]	3.22373354571284	-24.3948327357502	5.89275532507574	-4.13980071969757	3.47607654488853e-05	0.00330969802940104
Contig47532	#N/A	1.18227026636188	-24.4774432103398	5.89870982160984	-4.14962660490045	3.33018058347379e-05	0.00318150457000065
Contig94206	ref|XP_016994524.1| PREDICTED: pyruvate, phosphate dikinase-like [Drosophila takahashii]	0.657050969785167	-24.4840654284268	5.91343471093605	-4.14041358791822	3.46680188997428e-05	0.00330309309944501
Contig42329	ref|XP_011874259.1| PREDICTED: uncharacterized protein LOC105565567 [Vollenhovia emeryi]	28.2701216038568	-24.484067491512	5.88950785179293	-4.15723488407581	3.22122755555958e-05	0.00308995105171692
Contig89684	ref|XP_011707808.1| PREDICTED: 1-phosphatidylinositol 4,5-bisphosphate phosphodiesterase [Wasmannia auropunctata]	0.845649419944904	-24.4883175364313	5.91036077276039	-4.1432864215824	3.4236391415227e-05	0.00326416963414125
Contig81440	#N/A	1.04252308410886	-24.5055054389981	5.90476678863643	-4.15012248852203	3.32297402948552e-05	0.00317676766877006
Contig26353	ref|XP_011685705.1| PREDICTED: gamma-tubulin complex component 5 isoform X3 [Wasmannia auropunctata]	5.28112342019096	-24.534122640951	5.909725265006	-4.15148277471171	3.30328130540609e-05	0.00316007947603226
Contig140016	#N/A	0.319075049800539	-24.593413333211	5.92241210820801	-4.15260081261931	3.2871786416218e-05	0.00314680542361271
Contig144526	ref|XP_011688242.1| PREDICTED: CDK5RAP1-like protein [Wasmannia auropunctata]	3.16439755711667	-24.664762897245	4.63996326656399	-5.3157237418196	1.062342226407e-07	6.27549146314202e-05
Contig71308	ref|XP_011156034.1| PREDICTED: probable ATP-dependent RNA helicase DDX23, partial [Solenopsis invicta]	1.42102395071097	-24.6690406132968	5.895402877474	-4.1844537389558	2.85852649628098e-05	0.00277024155243494
Contig90376	ref|XP_016773104.1| PREDICTED: putative arabinogalactan oligomer transport system permease protein GanQ, partial [Apis mellifera]	0.710443500572513	-24.6791676102553	5.91469752457845	-4.17251558641863	3.01254984125857e-05	0.00290555805406357
Contig61746	ref|XP_011871685.1| PREDICTED: uncharacterized protein LOC105564130 [Vollenhovia emeryi]	1.47145478708378	-24.6950422848586	5.6787302333124	-4.34869086402331	1.36952598803819e-05	0.0014430269465461
Contig103973	ref|XP_011877553.1| PREDICTED: polypyrimidine tract-binding protein 1 isoform X4 [Vollenhovia emeryi]	1.54180120765775	-24.7088018454823	5.91373480749183	-4.17820593073938	2.93817570046834e-05	0.00283769932979545
Contig70115	ref|XP_011879644.1| PREDICTED: uncharacterized protein LOC105568521, partial [Vollenhovia emeryi]	0.913196496388936	-24.7335334353098	5.91741919182024	-4.17978389455651	2.91786248112963e-05	0.0028219385010005
Contig71704	#N/A	1.64311520608472	-24.835748718547	5.9214876939818	-4.19417382962535	2.73867910196533e-05	0.00265961887142015
Contig99163	ref|XP_011867945.1| PREDICTED: uncharacterized protein LOC105562053 [Vollenhovia emeryi]	0.500685607121496	-24.8665354267748	5.91795561524106	-4.20187933865771	2.64708222574991e-05	0.0025830440417941
Contig17195	ref|XP_009055569.1| hypothetical protein LOTGIDRAFT_209470, partial [Lottia gigantea]	2.25858285753259	-24.8810644978635	5.91793378556918	-4.20434993012861	2.61833590974957e-05	0.00256029764041443
Contig19311	ref|XP_012056357.1| PREDICTED: sodium-independent sulfate anion transporter-like [Atta cephalotes]	0.807015575518743	-24.8870982778076	5.91987241958106	-4.20399233528902	2.62247821343229e-05	0.00256080376035481
Contig105067	ref|XP_011053370.1| PREDICTED: GRIP and coiled-coil domain-containing protein 1-like isoform X1 [Acromyrmex echinatior]	1.20416372727259	-24.8891081754889	5.90687157741103	-4.21358545709195	2.51348424152182e-05	0.00247145290796318
Contig104520	ref|XP_011686585.1| PREDICTED: longitudinals lacking protein, isoforms H/M/V isoform X20 [Wasmannia auropunctata]	0.934251425038211	-24.9254623881741	5.91608721794153	-4.21316682292706	2.51814933154085e-05	0.00247431812307878
Contig51888	#N/A	0.399696180865074	-24.9504839920683	5.91619295713428	-4.21732086374579	2.47222076027406e-05	0.00243426743389856
Contig104638	#N/A	0.842063013248005	-24.9555808007588	5.91630546979923	-4.21810214637305	2.46367213012641e-05	0.00242923573601167
Contig143796	ref|XP_011875586.1| PREDICTED: MRG/MORF4L-binding protein [Vollenhovia emeryi]	1.93067117765389	-24.9561855717008	4.8235727195562	-5.17379689758194	2.29384162940371e-07	6.27549146314202e-05
Contig55693	#N/A	0.577634854457097	-24.9669950348451	5.91286072763688	-4.22248995619814	2.416181690513e-05	0.00238809357762848
Contig119254	#N/A	0.83914399421948	-24.9767992459187	5.91409417130885	-4.22326708409363	2.40786193642682e-05	0.00238418828333077
Contig89848	#N/A	1.80769801768598	-24.9824440490276	5.91661023468787	-4.22242518233847	2.41687637813168e-05	0.00238809357762848
Contig19207	ref|XP_011859007.1| PREDICTED: uncharacterized protein LOC105556520 [Vollenhovia emeryi]	4.81631011753239	-25.0047433241893	5.89014021242348	-4.2451864340087	2.18411746269672e-05	0.00218407109077607
Contig98896	#N/A	0.679631581379785	-25.0116862261676	5.90595611141002	-4.23499358179216	2.28558233804893e-05	0.00227266662645531
Contig70533	ref|XP_009059992.1| hypothetical protein LOTGIDRAFT_154010 [Lottia gigantea]	1.43214181294558	-25.0168758736038	5.91128752306888	-4.23205194739303	2.31568904772092e-05	0.0023009839337259
Contig145916	#N/A	0.339851670646718	-25.0227887679406	5.91918666802539	-4.22740321793029	2.36403804863161e-05	0.00234243677529804
Contig2921	ref|XP_017118186.1| PREDICTED: scyllo-inositol 2-dehydrogenase (NAD(+))-like [Drosophila elegans]	1.24968278036244	-25.0504490764981	5.81157783004978	-4.3104385433798	1.62931106319036e-05	0.00167918866007009
Contig40302	#N/A	0.4914485710169	-25.058485641618	5.91127647620989	-4.23909890570447	2.24418774673369e-05	0.00223780519442646
Contig70117	ref|XP_011879644.1| PREDICTED: uncharacterized protein LOC105568521, partial [Vollenhovia emeryi]	1.12119690305109	-25.085432548145	5.91115788394033	-4.24374260350888	2.19822480956228e-05	0.00219507117255634
Contig91257	ref|XP_017118317.1| PREDICTED: protein smf-like [Drosophila elegans]	1.18426388239264	-25.1426260221513	5.91154889119737	-4.25313678105413	2.10796728386688e-05	0.00212143485262492
Contig139596	#N/A	0.333984192120055	-25.1515246636746	5.9222142872001	-4.24697983624732	2.1667145096521e-05	0.00216973961779101
Contig68900	#N/A	1.12621471184601	-25.1607777222945	5.91379937080173	-4.25458764234057	2.0943461693827e-05	0.00210922901422143
Contig49220	ref|XP_015608840.1| PREDICTED: phosphate import ATP-binding protein PstB-like [Cephus cinctus]	0.96330658279612	-25.1631679578078	5.90988877856133	-4.25780736332798	2.0644171780789e-05	0.00208205534625991
Contig5702	#N/A	0.381075329657978	-25.1819031730244	5.91640756923209	-4.2562826983018	2.07853861941592e-05	0.00209480222045372
Contig30055	#N/A	0.570314878739117	-25.202807154311	5.56199935807819	-4.53124956185167	5.86358202007698e-06	0.00066707451585412
Contig146505	#N/A	0.267775048860397	-25.2631742612635	5.92744021652303	-4.26207154158066	2.02540575415761e-05	0.00204855946202726
Contig143885	#N/A	1.67794879939952	-25.2929894276715	5.92284660178827	-4.27041102500187	1.95113049675071e-05	0.00197626441433251
Contig79752	#N/A	2.23246691284439	-25.3414653272177	5.90651154784775	-4.2904284740545	1.78328716029389e-05	0.00181798792127017
Contig78506	#N/A	0.445158243995031	-25.3512136563639	5.91273035817447	-4.28756464791521	1.8064269318275e-05	0.0018402502248481
Contig108826	#N/A	0.363754081806193	-25.3536039287259	5.92619977957905	-4.27822295429379	1.8839127620138e-05	0.00191229325814845
Contig64152	#N/A	0.77894132427976	-25.4159539330637	5.91140918085745	-4.29947465240041	1.71203454527208e-05	0.00175040047136982
Contig62577	#N/A	0.859450056124931	-25.4330169928905	5.92201856141718	-4.2946533735288	1.74966488680222e-05	0.00178628901380414
Contig34886	ref|XP_011050843.1| PREDICTED: uncharacterized protein LOC105143938 [Acromyrmex echinatior]	0.885746448122452	-25.467621089561	5.89906362380139	-4.31723112576798	1.57998692071416e-05	0.00163671123120344
Contig85864	ref|XP_014229558.1| PREDICTED: uncharacterized protein LOC106654278 [Trichogramma pretiosum]	2.55100033205982	-25.4744117405828	5.91043903358388	-4.31007097710236	1.63202156701938e-05	0.00168075620521237
Contig71117	ref|XP_011881781.1| PREDICTED: RNA binding protein fox-1 homolog 2 isoform X3 [Vollenhovia emeryi]	1.0577582370129	-25.4756730677692	5.91453316684361	-4.30730073686689	1.65258854678579e-05	0.00169362130939384
Contig17532	ref|XP_011169209.1| PREDICTED: kinesin-like protein Klp10A isoform X3 [Solenopsis invicta]	1.65919784120948	-25.4791812946485	5.91252758734512	-4.30935516464784	1.63731244408759e-05	0.00168393661802237
Contig85115	#N/A	0.51894080503281	-25.4839579487629	5.91126078983166	-4.31108673002544	1.62454166288709e-05	0.00167653248124815
Contig71564	#N/A	2.03462476511677	-25.5017180650361	5.91962564214414	-4.3079950670325	1.64741058473315e-05	0.00169167277173721
Contig45744	ref|XP_012349693.1| PREDICTED: retinal-specific ATP-binding cassette transporter-like [Apis florea]	1.56791056086795	-25.5047413051946	5.91094110393503	-4.31483597226431	1.5972145224573e-05	0.00165334520424652
Contig147018	#N/A	9.03840588564611	-25.525170068325	5.88772667521934	-4.33531844739959	1.45549260429651e-05	0.00152000545830956
Contig95718	#N/A	0.579888762883975	-25.5274668073792	5.91812745735475	-4.31343646978319	1.60736343626418e-05	0.00166141647003526
Contig58899	#N/A	0.538064532107516	-25.5299689316106	5.47201774694187	-4.66554936629699	3.07793586296977e-06	0.000368561952228847
Contig748	#N/A	1.29374443452981	-25.5545122039331	5.89984052666501	-4.33139032969392	1.48170744710052e-05	0.00154619514929678
Contig19923	#N/A	0.372774428946236	-25.5634016608339	5.9208476953334	-4.31752393850328	1.5778930009496e-05	0.00163574135990591
Contig139225	#N/A	0.591405102571555	-25.5713386255598	5.36887269580492	-4.76288786760404	1.90841900416785e-06	0.000236954200379529
Contig91648	ref|XP_011874188.1| PREDICTED: uncharacterized protein LOC105565527 [Vollenhovia emeryi]	5.28628072457433	-25.5946452924857	3.45723592519553	-7.40321049713673	1.32930779201285e-13	3.15938498738654e-09
Contig77202	ref|XP_011696875.1| PREDICTED: uncharacterized protein LOC105455329 isoform X2 [Wasmannia auropunctata]	0.45794728644268	-25.6122838075435	5.91625088378996	-4.32914092228899	1.49692127074528e-05	0.00155636854151947
Contig62570	#N/A	0.368119433263567	-25.6224635176441	5.91855479374589	-4.32917568740248	1.49668500842905e-05	0.00155636854151947
Contig146358	#N/A	0.312059052890173	-25.6455247520461	5.92194515732277	-4.33059139704024	1.48709405055965e-05	0.00154957174086966
Contig64344	#N/A	0.579929220005956	-25.6811800807043	5.91052531558717	-4.34499113183361	1.39281289858651e-05	0.00146211206635645
Contig70969	#N/A	0.646352827277081	-25.7061077538983	5.91225734094592	-4.34793451493867	1.37425620305332e-05	0.00144693203221181
Contig63491	ref|XP_012525201.1| PREDICTED: uncharacterized protein LOC105830435 [Monomorium pharaonis]	0.542147888937732	-25.7221236713661	5.91177825492186	-4.35099602221228	1.35520511117567e-05	0.00142900310890887
Contig21939	#N/A	0.463046707494543	-25.7321698755627	5.9270982032441	-4.34144483408063	1.4154882030241e-05	0.00148261109431206
Contig146846	#N/A	0.342798362021548	-25.7345653276946	5.92422274487087	-4.34395640339069	1.3993929842847e-05	0.00146683998887593
Contig62493	ref|XP_011864745.1| PREDICTED: nesprin-1 isoform X4 [Vollenhovia emeryi]	0.523936308211565	-25.7359794248293	5.90895476029803	-4.35541994630726	1.32812049278812e-05	0.00140358594816368
Contig29201	#N/A	0.557967624713791	-25.7467253252303	5.91366528048698	-4.35376777413924	1.33817461981008e-05	0.00141315440400078
Contig16205	#N/A	0.324563006734386	-25.7813405624214	5.91705522948052	-4.35712352894243	1.31782899572777e-05	0.00139479613190522
Contig39321	ref|XP_012538360.1| PREDICTED: uncharacterized protein LOC105837813 [Monomorium pharaonis]	3.08577205292813	-25.821480377103	4.03485508871263	-6.39960539086962	1.55779024449553e-10	1.10055544088243e-06
Contig119887	ref|XP_011170369.1| PREDICTED: uncharacterized protein LOC105203292 [Solenopsis invicta]	2.69737274607451	-25.8789247952333	5.92162326089116	-4.37024168122082	1.24109096110202e-05	0.00131653475623747
Contig119970	ref|XP_012528553.1| PREDICTED: major facilitator superfamily domain-containing protein 6 [Monomorium pharaonis]	5.98845181859661	-25.8939817004034	3.49824630705913	-7.40198929050588	1.3415932344154e-13	3.15938498738654e-09
Contig143529	ref|XP_011689749.1| PREDICTED: sodium channel protein para [Wasmannia auropunctata]	4.22001355916428	-25.8951645480272	5.90015302674148	-4.38889710667869	1.13926951951919e-05	0.00121582602189957
Contig76407	ref|XP_011172550.1| PREDICTED: uncharacterized protein LOC105204964 [Solenopsis invicta]	0.571154045233145	-25.9563984353459	5.91505024443662	-4.38819576549821	1.14294875054784e-05	0.00121883192155591
Contig75928	ref|XP_014085430.1| PREDICTED: probable 60S ribosomal protein L37-A [Bactrocera oleae]	0.677211752923951	-25.9635685258473	5.91889524801428	-4.38655651737674	1.15159252310886e-05	0.00122712344447747
Contig36121	ref|XP_011696052.1| PREDICTED: hydroxyacid oxidase 1-like [Wasmannia auropunctata]	1.03040183020501	-25.987342237291	5.90152518292393	-4.40349594923112	1.06520273780492e-05	0.00114805454800627
Contig29239	ref|XP_011871144.1| PREDICTED: hemicentin-2 [Vollenhovia emeryi]	6.98789013627958	-25.9950603508317	3.28986930801045	-7.9015480303539	2.75460665988988e-15	1.29739219074153e-10
Contig85308	#N/A	0.384032924194036	-26.0164813340879	5.92066868674295	-4.39417956156569	1.11191882744574e-05	0.00119203941245524
Contig19656	ref|XP_011883953.1| PREDICTED: uncharacterized protein LOC105571092 [Vollenhovia emeryi]	3.1564740488997	-26.0239608672095	5.91146694941158	-4.4022847611116	1.07116837153357e-05	0.00115360424841905
Contig62146	ref|XP_011502643.1| PREDICTED: glucose 1,6-bisphosphate synthase [Ceratosolen solmsi marchali]	0.70727465185656	-26.0326132089771	5.90788805969136	-4.40641612467131	1.05094976497935e-05	0.00113679817559908
Contig58008	#N/A	0.501850659229947	-26.039622309473	5.90930240291927	-4.40654759800566	1.05031236524903e-05	0.00113679817559908
Contig74676	ref|XP_012535252.1| PREDICTED: AP-3 complex subunit beta-1 [Monomorium pharaonis]	0.945644284268951	-26.0604248941918	5.90292578860637	-4.4148318693914	1.01088525638457e-05	0.0010994060055984
Contig141755	#N/A	1.17191090154517	-26.0660316384041	5.92251490811755	-4.40117619673315	1.07665648888881e-05	0.00115774986233274
Contig53845	#N/A	0.785477691188102	-26.0740019579856	5.90111026826276	-4.41849088945454	9.93924691521752e-06	0.00108196130306586
Contig142156	#N/A	1.10694566326157	-26.0911846982183	5.91007098273312	-4.41469904074695	1.01150612346895e-05	0.0010994060055984
Contig49256	#N/A	1.55358404441782	-26.1001015275523	4.87225085072844	-5.35688787937718	8.46676235560082e-08	6.27549146314202e-05
Contig37373	ref|XP_011872366.1| PREDICTED: uncharacterized protein LOC105564534 [Vollenhovia emeryi]	12.2748650367026	-26.1097189938639	5.90392920367591	-4.4224309088272	9.75965636163797e-06	0.00106405105318701
Contig90616	ref|XP_011694348.1| PREDICTED: transmembrane protein adipocyte-associated 1 homolog isoform X2 [Wasmannia auropunctata]	4.43116565712791	-26.1220004433091	5.72435200567179	-4.56331134378649	5.03530570136236e-06	0.000579848076353217
Contig2133	ref|XP_014358272.1| PREDICTED: uncharacterized protein LOC106710659 [Papilio machaon]	0.397813699390257	-26.1998741282523	5.92211568990596	-4.42407333799794	9.68571162840341e-06	0.0010568046300838
Contig23539	#N/A	0.515318815354634	-26.2141554570359	5.91777335157094	-4.42973292481318	9.434985995057e-06	0.00103263765774095
Contig53470	#N/A	0.373231892605586	-26.2171793644611	5.9226861525814	-4.4265690750867	9.57437322423866e-06	0.00104546384348165
Contig127543	ref|XP_011866150.1| PREDICTED: putative serine protease K12H4.7 [Vollenhovia emeryi]	20.4085295134792	-26.2526873986275	5.92928852486391	-4.4276285912786	9.52747731647755e-06	0.00104114768939391
Contig76221	ref|XP_012523460.1| PREDICTED: pyridoxal kinase [Monomorium pharaonis]	3.25454649038309	-26.2886912561178	5.89657098367818	-4.45830149910608	8.26116498928669e-06	0.000914794537218841
Contig104605	#N/A	1.73650627724591	-26.2995295797057	5.91740084839136	-4.44443941749446	8.81213343081331e-06	0.000968217742903288
Contig106346	#N/A	0.626335109900706	-26.3076735631568	5.90652845986215	-4.45399928941861	8.42853790506582e-06	0.000930411812790692
Contig22070	#N/A	0.642150162445544	-26.3232596797223	5.90812046436068	-4.45543719673813	8.37224028159281e-06	0.000924919808497435
Contig59294	ref|XP_017047594.1| PREDICTED: zinc-type alcohol dehydrogenase-like protein MW2112, partial [Drosophila ficusphila]	0.694893837947053	-26.3872411424683	5.92078740374669	-4.45671147147934	8.32264982380542e-06	0.000920160760684065
Contig122363	ref|XP_011879066.1| PREDICTED: aminopeptidase N-like isoform X1 [Vollenhovia emeryi]	2.54318100155548	-26.4324555824137	5.90558425481886	-4.47584090614662	7.61111467533253e-06	0.000848129077508249
Contig108008	#N/A	0.772471737308468	-26.4379728157577	5.90860112404823	-4.47448935216732	7.65941432044818e-06	0.000852838664488863
Contig126185	ref|XP_011172550.1| PREDICTED: uncharacterized protein LOC105204964 [Solenopsis invicta]	5.93593568518017	-26.4427339584463	3.84639365007421	-6.87468219950294	6.21282058269156e-12	1.09731613734071e-07
Contig9427	#N/A	1.21480847866905	-26.4430164188666	5.89905905270179	-4.48258208345203	7.37452623865513e-06	0.000824179504914557
Contig54121	#N/A	0.382233954903234	-26.4451752585004	5.92140020660788	-4.46603410270925	7.96829136449603e-06	0.000884442784704788
Contig75323	ref|XP_011882740.1| PREDICTED: another transcription unit protein-like [Vollenhovia emeryi]	0.563336399107809	-26.5533282119632	5.92731970867288	-4.47982047823576	7.47058450224471e-06	0.000833784501116644
Contig26666	ref|XP_011874257.1| PREDICTED: uncharacterized protein LOC105565563 [Vollenhovia emeryi]	0.708923484926491	-26.5668793450262	5.90607514768906	-4.4982291421438	6.85218224512149e-06	0.000770240886785148
Contig36285	ref|XP_011881583.1| PREDICTED: WD repeat and FYVE domain-containing protein 3 [Vollenhovia emeryi]	0.379994541079861	-26.6046498853277	5.92687582943761	-4.48881512806253	7.1620417305322e-06	0.000802517851228397
Contig90191	ref|XP_017117674.1| PREDICTED: glycerol-3-phosphate regulon repressor-like [Drosophila elegans]	0.900972304217028	-26.6291365339003	5.90618334390621	-4.50868775710718	6.52298269157718e-06	0.000736752905972646
Contig118887	#N/A	0.909092869919675	-26.6613745128486	5.90939287172722	-4.51169436379949	6.43118135220268e-06	0.00072754734309222
Contig15487	ref|XP_011700151.1| PREDICTED: V-type proton ATPase 116 kDa subunit a isoform 1 [Wasmannia auropunctata]	6.70112292365682	-26.6797592835481	5.88585405177042	-4.53286116999843	5.81900622816675e-06	0.000662536763111424
Contig103290	ref|XP_011872641.1| PREDICTED: BTB/POZ domain-containing protein 17 [Vollenhovia emeryi]	1.88876280392528	-26.733090146035	5.90737621376119	-4.52537457894766	6.0288627304845e-06	0.000684775094235747
Contig61393	#N/A	0.355434621909302	-26.7810309766707	5.91890680917971	-4.52465832628682	6.04931533792182e-06	0.000685995272313274
Contig80262	ref|XP_017084432.1| PREDICTED: succinate dehydrogenase flavoprotein subunit-like [Drosophila eugracilis]	0.506308857322556	-26.7974386779026	5.91946855087366	-4.5270007683287	5.98267226514689e-06	0.000680075336322173
Contig75828	#N/A	0.677463141295635	-26.8164551292735	5.90786902084373	-4.53910793124586	5.64927159434605e-06	0.000645171172223731
Contig114843	ref|XP_011630808.1| PREDICTED: aminopeptidase N-like [Pogonomyrmex barbatus]	0.697138895007311	-26.8326665499916	5.91378865457292	-4.53730562881087	5.69775038743278e-06	0.000649254061687976
Contig56743	ref|XP_011705409.1| PREDICTED: serine/threonine-protein kinase 11-interacting protein isoform X2 [Wasmannia auropunctata]	2.37743147346314	-26.8753043125218	5.92100509568473	-4.53897672408841	5.6527874704557e-06	0.000645171172223731
Contig9974	#N/A	0.614037314663029	-27.0048427810741	5.91555338909525	-4.56505773929028	4.99356881041953e-06	0.000575510841929729
Contig67362	ref|XP_011638658.1| PREDICTED: uncharacterized protein LOC105428197 isoform X2 [Pogonomyrmex barbatus]	0.852076265627068	-27.0471307893113	5.90668801913661	-4.57906879484467	4.6705057802592e-06	0.000540481945318005
Contig42700	ref|XP_012229271.1| PREDICTED: uncharacterized protein LOC105676159 isoform X10 [Linepithema humile]	14.3342220588607	-27.0520286678912	5.88511322158412	-4.59668788846335	4.29259888734425e-06	0.000500851647386523
Contig57443	ref|XP_011566096.1| PREDICTED: glutamate-1-semialdehyde 2,1-aminomutase 2, chloroplastic-like [Plutella xylostella]	1.99378638557521	-27.1108347379938	5.60217483211611	-4.83934106850307	1.30270318498432e-06	0.000164935530402087
Contig69976	ref|XP_011696169.1| PREDICTED: leukotriene A-4 hydrolase [Wasmannia auropunctata]	3.05418958040294	-27.1123569724745	5.89046969556659	-4.60274958937152	4.16949430386402e-06	0.000488798130001468
Contig38151	ref|XP_011169061.1| PREDICTED: prohormone-4 [Solenopsis invicta]	0.760420467867284	-27.1378668774366	5.90527541878663	-4.59552941275222	4.31651896236595e-06	0.000503227046060579
Contig60582	#N/A	1.60563175303328	-27.1428766571501	4.82013338905316	-5.63114637424628	1.79015712486802e-08	5.74872343801082e-05
Contig77041	#N/A	0.538232689847924	-27.1499585648854	5.91809896854219	-4.58761482516628	4.4833884416051e-06	0.000520533555163086
Contig88019	ref|XP_017118358.1| PREDICTED: aminopeptidase N-like [Drosophila elegans]	0.814683071011657	-27.1557911783872	5.90280227186685	-4.60049141537631	4.21495392061788e-06	0.000493013529901941
Contig93875	#N/A	0.739350713747958	-27.1670600730668	5.90356346064186	-4.60180707028651	4.18841086765232e-06	0.000490314739326156
Contig79411	ref|XP_013190478.1| PREDICTED: retrovirus-related Pol polyprotein from transposon TNT 1-94 [Amyelois transitella]	28.5071198292341	-27.1789112111961	5.91473159264374	-4.59512165268819	4.32496869341986e-06	0.000503381467441636
Contig48444	ref|XP_012541869.1| PREDICTED: probable beta-glucosidase L [Monomorium pharaonis]	1.11838127213857	-27.2204199424884	5.90604625254778	-4.60890734317326	4.0479066688042e-06	0.00047583782743929
Contig24166	ref|XP_011646195.1| PREDICTED: retinoid-inducible serine carboxypeptidase-like isoform X1 [Pogonomyrmex barbatus]	46.774513371903	-27.2557721978285	5.92576112931279	-4.5995394689474	4.23425965972058e-06	0.000494862024102183
Contig36670	#N/A	0.444077707731963	-27.3330821986592	5.92459362428932	-4.61349485416191	3.95954071157351e-06	0.000465837821751209
Contig27940	ref|XP_011687654.1| PREDICTED: high affinity copper uptake protein 1 [Wasmannia auropunctata]	2.62985998860022	-27.3354768363836	5.91875009246793	-4.61845430358179	3.86609093986569e-06	0.000455222542941836
Contig81038	#N/A	2.94828661318512	-27.3375247903301	5.9065826741582	-4.62831493241161	3.68653100849599e-06	0.000435167729245997
Contig105833	ref|XP_012542391.1| PREDICTED: DDB1- and CUL4-associated factor 11 [Monomorium pharaonis]	3.26976116255355	-27.3378097609018	5.89083822422857	-4.64073341013906	3.47174780817959e-06	0.000411533179574121
Contig64043	ref|XP_003695175.1| PREDICTED: formin-like protein CG32138, partial [Apis florea]	1.20614850317914	-27.3512886973505	5.9019534289702	-4.63427728234767	3.58186626053194e-06	0.000423875173378879
Contig87309	#N/A	0.848738192107817	-27.3540861616673	5.90302676223303	-4.63390854615059	3.58825563868926e-06	0.000424275947263495
Contig147248	ref|XP_011866807.1| PREDICTED: collagen alpha-2(IV) chain-like isoform X1 [Vollenhovia emeryi]	0.831209534310098	-27.4403511068158	5.90362219417587	-4.64805338219079	3.35082206909698e-06	0.000398201098315556
Contig73889	#N/A	0.344731506862242	-27.4618059954404	5.9274116600884	-4.63301818234619	3.60372874401771e-06	0.000425749214334006
Contig141736	ref|XP_011876001.1| PREDICTED: SWI/SNF-related matrix-associated actin-dependent regulator of chromatin subfamily A-like protein 1 [Vollenhovia emeryi]	3.10407200142564	-27.508507339566	5.90686475116233	-4.65704032484458	3.20787630611443e-06	0.000382500673776414
Contig74507	#N/A	3.08002868837842	-27.5333465955467	5.24342774608624	-5.25102050201758	1.51258841087415e-07	6.27549146314202e-05
Contig84962	ref|XP_011861492.1| PREDICTED: dynein intermediate chain 2, axonemal [Vollenhovia emeryi]	0.41255438053865	-27.5465425686194	5.91721742996383	-4.65532032490951	3.23477394203258e-06	0.000385382675959003
Contig134503	ref|XP_012060475.1| PREDICTED: cytochrome P450 6A1-like [Atta cephalotes]	0.850663916506739	-27.5503994936334	5.90052895229259	-4.66914063406621	3.0246228216888e-06	0.00036310121566369
Contig143681	ref|XP_011865165.1| PREDICTED: axonemal 84 kDa protein-like [Vollenhovia emeryi]	1.99834074991784	-27.5535616500664	5.90758690746524	-4.66409755483203	3.09974314893105e-06	0.000370858939639721
Contig4123	ref|XP_011174126.1| PREDICTED: uncharacterized protein LOC105206319 [Solenopsis invicta]	1.07911139774528	-27.5647759237939	5.83280751367627	-4.7258161458547	2.29192948846482e-06	0.000279898669776675
Contig140799	ref|XP_012060137.1| PREDICTED: trafficking protein particle complex subunit 11 [Atta cephalotes]	3.4037029411115	-27.5700273494676	5.90603159621743	-4.668113757997	3.03977586548331e-06	0.000364301281140963
Contig79560	ref|XP_011866389.1| PREDICTED: uncharacterized protein LOC105561218 [Vollenhovia emeryi]	0.807081315501873	-27.5737726560856	5.90661859622496	-4.66828392706929	3.03725975004253e-06	0.000364301281140963
Contig35382	#N/A	0.62962677944508	-27.638413921254	5.91117995396805	-4.67561707416823	2.93071022518278e-06	0.00035212632881603
Contig72020	ref|XP_011864070.1| PREDICTED: innexin inx7 isoform X2 [Vollenhovia emeryi]	1.76467571173059	-27.678084980788	5.90045554165246	-4.69083866243937	2.72087462939056e-06	0.000328030223983787
Contig3866	ref|XP_011883524.1| PREDICTED: solute carrier family 25 member 40-like isoform X1 [Vollenhovia emeryi]	2.19415318114383	-27.6794657024572	4.77408574185959	-5.79785684613104	6.7167748438424e-09	2.4334875259241e-05
Contig97832	ref|XP_011702118.1| PREDICTED: COMM domain-containing protein 8-like [Wasmannia auropunctata]	2.18976440327418	-27.7809238132218	5.89949485628745	-4.70903433089936	2.48893151464572e-06	0.000301352661717992
Contig128175	ref|XP_011695492.1| PREDICTED: MATH and LRR domain-containing protein PFE0570w [Wasmannia auropunctata]	2.80900003800311	-27.8369152580104	5.90549552500326	-4.71373064972309	2.43222125317429e-06	0.000294991902497654
Contig66915	ref|XP_012521378.1| PREDICTED: uncharacterized protein LOC105827798 [Monomorium pharaonis]	1.90121073968333	-27.8409380295606	5.90926194816832	-4.71140698682182	2.46012375401182e-06	0.000298120159580281
Contig56881	ref|XP_011636222.1| PREDICTED: iduronate 2-sulfatase [Pogonomyrmex barbatus]	0.824227152901312	-27.8862967732549	5.90919552700394	-4.71913590366398	2.36848553861476e-06	0.000288748836194693
Contig138172	ref|XP_011871364.1| PREDICTED: huntingtin-interacting protein 1 [Vollenhovia emeryi]	2.72970602687905	-27.9644348509909	5.90628626012813	-4.73469006061759	2.19390099600427e-06	0.000269089955757305
Contig121845	#N/A	0.678864504674634	-27.9679310631843	5.91343716205967	-4.72955580599135	2.2501159974914e-06	0.000275268086664539
Contig149341	ref|XP_012218918.1| PREDICTED: uncharacterized protein LOC105670147 [Linepithema humile]	0.871228793720459	-27.9898572870535	5.90015995874301	-4.74391499260583	2.09626845025962e-06	0.000258235783100552
Contig108507	#N/A	0.974287886152732	-28.0052011587711	5.89108746896119	-4.75382538560565	1.9960344587043e-06	0.00024653293785974
Contig110609	ref|XP_011050668.1| PREDICTED: UPF0160 protein MYG1, mitochondrial [Acromyrmex echinatior]	0.940757117981591	-28.033470762633	5.92281664921123	-4.73313162013319	2.21082023000586e-06	0.000270929979218681
Contig30838	#N/A	1.67633529976964	-28.0695444191851	5.62688583283954	-4.98846880016048	6.08597378188865e-07	8.26855612941846e-05
Contig42849	ref|XP_012226112.1| PREDICTED: protein hu-li tai shao isoform X3 [Linepithema humile]	2.0172271495622	-28.2212793810464	5.90613293939503	-4.77830073766289	1.7678283589781e-06	0.000221247868590371
Contig90986	#N/A	0.586072360773547	-28.2594802541087	5.91692604136556	-4.77604081182443	1.78780124273258e-06	0.000223154551408468
Contig78556	#N/A	0.417456732430111	-28.2707657018349	5.91924328545087	-4.77607767386799	1.78747372878151e-06	0.000223154551408468
Contig7287	ref|XP_011863932.1| PREDICTED: disintegrin and metalloproteinase domain-containing protein 10 isoform X1 [Vollenhovia emeryi]	2.15868839531131	-28.2734075181102	5.90110717588021	-4.79120386656813	1.65783570120701e-06	0.000207850231653458
Contig144099	ref|XP_011702564.1| PREDICTED: glycogen [starch] synthase [Wasmannia auropunctata]	1.27337112499494	-28.2805198079665	5.92205221439494	-4.7754593820068	1.79297479741713e-06	0.000223602789012047
Contig68550	ref|XP_015596585.1| PREDICTED: uncharacterized protein LOC107268379 [Cephus cinctus]	39.1080959946782	-28.3108501346363	5.92582607710795	-4.77753645926327	1.77455881910627e-06	0.000221893661471911
Contig65820	ref|XP_012056871.1| PREDICTED: F-box/LRR-repeat protein 4-like [Atta cephalotes]	0.757022029460395	-28.3280638045029	5.90585719165214	-4.79660494407897	1.61377427668074e-06	0.000202866071149608
Contig94440	#N/A	0.14104378101503	-28.32934404205	5.9362056348141	-4.77229829706484	1.82135477821251e-06	0.000226741820349862
Contig17556	ref|XP_011872944.1| PREDICTED: sodium- and chloride-dependent glycine transporter 1-like isoform X1 [Vollenhovia emeryi]	30.18145203474	-28.3428560596126	5.90557661396099	-4.79933762820198	1.59191236025474e-06	0.000200296029178018
Contig6179	ref|XP_011694235.1| PREDICTED: vitellogenin receptor-like [Wasmannia auropunctata]	1.48596526885539	-28.4869596814174	5.90085374578878	-4.82759968449439	1.38188521744986e-06	0.000174804150017917
Contig117761	ref|XP_011688005.1| PREDICTED: tyrosine-protein kinase receptor torso-like isoform X3 [Wasmannia auropunctata]	0.613697262548522	-28.5161626478568	5.90888706555274	-4.82597862025467	1.39317454435507e-06	0.000175760163922981
Contig76777	ref|XP_011862944.1| PREDICTED: uncharacterized protein LOC105559342 [Vollenhovia emeryi]	27.0596516303366	-28.5277872763304	5.91125552193623	-4.82601152504166	1.39294451127285e-06	0.000175760163922981
Contig123062	ref|XP_011694833.1| PREDICTED: rho guanine nucleotide exchange factor 3-like isoform X2 [Wasmannia auropunctata]	1.27156830556251	-28.5956028809619	5.90056690241595	-4.84624670033884	1.25819047343043e-06	0.000159442636165291
Contig34274	ref|XP_012523787.1| PREDICTED: ATP-binding cassette sub-family G member 4 [Monomorium pharaonis]	3.61029946708224	-28.6518330491189	4.47086217052091	-6.40856997069551	1.46890863266544e-10	1.09238096352489e-06
Contig82069	ref|XP_013381517.1| PREDICTED: calmodulin isoform X3 [Lingula anatina]	1.68054397090243	-28.6753620816825	5.90509721688471	-4.85603556190231	1.19759203057178e-06	0.00015258445549477
Contig109093	#N/A	0.478185553267354	-28.727961393341	5.91122822192321	-4.85989718461495	1.17446731248273e-06	0.000150044039649071
Contig83218	ref|XP_014209289.1| PREDICTED: uncharacterized protein LOC106639961 [Copidosoma floridanum]	3.60477161168073	-28.737514236778	5.90664876923342	-4.86528238930781	1.14293502023625e-06	0.000146280153581813
Contig92485	ref|XP_011874230.1| PREDICTED: F-box/WD repeat-containing protein 9-like [Vollenhovia emeryi]	0.418904264913716	-28.7488660391883	5.91870367983137	-4.8572909870709	1.1900264741041e-06	0.000151757374288345
Contig25818	ref|XP_012540473.1| PREDICTED: putative nuclease HARBI1 [Monomorium pharaonis]	0.16413445600493	-28.7767143554187	5.93461388584965	-4.84896151778859	1.2410949262801e-06	0.000157558840789397
Contig45734	#N/A	0.16413445600493	-28.7767143554187	5.93461388584965	-4.84896151778859	1.2410949262801e-06	0.000157558840789397
Contig67822	#N/A	0.16413445600493	-28.7767143554187	5.93461388584965	-4.84896151778859	1.2410949262801e-06	0.000157558840789397
Contig84922	#N/A	0.16413445600493	-28.7767143554187	5.93461388584965	-4.84896151778859	1.2410949262801e-06	0.000157558840789397
Contig88838	ref|XP_011868745.1| PREDICTED: uncharacterized protein LOC105562482 [Vollenhovia emeryi]	0.327084645201822	-28.7992206723841	5.92229890528699	-4.86284483997833	1.15710549492601e-06	0.00014795976028648
Contig123326	ref|XP_011159479.1| PREDICTED: D-beta-hydroxybutyrate dehydrogenase, mitochondrial [Solenopsis invicta]	1.5226432310306	-28.8108979416919	5.90809147338071	-4.87651521163836	1.07976365139205e-06	0.000138950241029821
Contig59198	ref|XP_011880963.1| PREDICTED: glutamate receptor ionotropic, NMDA 2B isoform X2 [Vollenhovia emeryi]	1.37545485345952	-28.8202130545217	5.90100483228052	-4.88395008539312	1.03981407756141e-06	0.000134369972049267
Contig98080	ref|XP_012058965.1| PREDICTED: leukotriene A-4 hydrolase [Atta cephalotes]	1.60150013436972	-28.8296772249921	5.91011667378723	-4.87802167305066	1.07155153152282e-06	0.000138019158386126
Contig47970	#N/A	0.306248527537316	-28.8743235813404	5.9335696918798	-4.86626517943413	1.13726902153208e-06	0.000145686945544351
Contig40487	#N/A	0.496942066227732	-28.8922617358384	5.93678637844409	-4.86665005174238	1.13505752197827e-06	0.000145535592271292
Contig67599	ref|XP_016936021.1| PREDICTED: ras-related protein Rab-11A [Drosophila suzukii]	0.162006344492816	-28.8946062969104	5.9355040364726	-4.86809647830383	1.1267832080639e-06	0.000144605891870849
Contig78380	ref|XP_011702564.1| PREDICTED: glycogen [starch] synthase [Wasmannia auropunctata]	2.25335116753117	-28.8973136259457	5.90533867493921	-4.89342190458589	9.90976482121162e-07	0.000128460554123187
Contig100237	ref|XP_011863591.1| PREDICTED: gametogenetin-binding protein 2-like isoform X1 [Vollenhovia emeryi]	4.39212697608019	-28.9050044772006	5.89961795175816	-4.89947056123974	9.60952466569659e-07	0.000125373684828156
Contig102907	ref|XP_011637194.1| PREDICTED: intraflagellar transport protein 88 homolog [Pogonomyrmex barbatus]	1.93555668810064	-28.9232650659907	5.90912419390764	-4.89467882496206	9.84664051442405e-07	0.000127759482531366
Contig105351	ref|XP_014610852.1| PREDICTED: leukotriene A-4 hydrolase [Polistes canadensis]	1.34124487090637	-28.9490496613554	4.2486173143085	-6.81375786985116	9.50816863946916e-12	1.49275078250119e-07
Contig60664	#N/A	0.144506786290253	-28.9878813863554	5.9359001602056	-4.88348533566834	1.04226904581128e-06	0.000134369972049267
Contig71785	#N/A	0.144506786290253	-28.9878813863554	5.9359001602056	-4.88348533566834	1.04226904581128e-06	0.000134369972049267
Contig77683	#N/A	0.144506786290253	-28.9878813863554	5.9359001602056	-4.88348533566834	1.04226904581128e-06	0.000134369972049267
Contig86920	#N/A	0.144506786290253	-28.9878813863554	5.9359001602056	-4.88348533566834	1.04226904581128e-06	0.000134369972049267
Contig48831	ref|XP_011860170.1| PREDICTED: uncharacterized protein LOC105557523 [Vollenhovia emeryi]	0.202837919136121	-28.9990780762896	5.93353565299012	-4.88731841725362	1.02218699286129e-06	0.000132384927158865
Contig50227	ref|XP_011873640.1| PREDICTED: protein cereblon isoform X4 [Vollenhovia emeryi]	1.38286038089549	-29.0397865602184	5.89796644224019	-4.9236947759215	8.49252646626734e-07	0.000111937361203748
Contig121101	#N/A	0.239528314546142	-29.0469760208896	5.93416595344854	-4.89487086285638	9.83703025337282e-07	0.000127752101444009
Contig76003	ref|XP_011647212.1| PREDICTED: LOW QUALITY PROTEIN: vacuolar protein sorting-associated protein 51 homolog [Pogonomyrmex barbatus]	1.94440988632455	-29.0730215592047	5.90713421489757	-4.9216795321636	8.58046375928785e-07	0.000112885827541536
Contig13582	ref|XP_011173491.1| PREDICTED: transient receptor potential cation channel protein painless-like [Solenopsis invicta]	7.92981828185914	-29.1054236872878	5.91505798023054	-4.92056439422312	8.6295001614557e-07	0.000113425347377973
Contig123275	ref|XP_012058680.1| PREDICTED: uncharacterized protein LOC105621850 [Atta cephalotes]	4.71909364632535	-29.1417479491644	5.90395801436259	-4.93596801980488	7.97541764127466e-07	0.000106011532122219
Contig61273	#N/A	0.250159000173452	-29.1475993081471	5.93416620707218	-4.91182725441862	9.02315330781682e-07	0.000118159823256218
Contig147503	#N/A	24.8558665964357	-29.1545030351231	5.91682556657829	-4.92738930817986	8.33356063488133e-07	0.000110047394114657
Contig66865	ref|XP_011870772.1| PREDICTED: thrombospondin type-1 domain-containing protein 4-like [Vollenhovia emeryi]	1.64767070537225	-29.1809124919181	5.89508365603953	-4.95004213587744	7.41974160077535e-07	9.91851683031934e-05
Contig88698	#N/A	0.309428171148537	-29.1944271889726	5.91967059549474	-4.93176549573409	8.14897119144932e-07	0.000108013619365686
Contig89012	#N/A	0.288523961083594	-29.2078957938537	5.93409257716003	-4.9220492289374	8.56426624485019e-07	0.000112777737893625
Contig122233	ref|XP_011862365.1| PREDICTED: uncharacterized protein LOC105558992 [Vollenhovia emeryi]	1.00623653521932	-29.208574395988	5.90755026076777	-4.94427861070655	7.64263379165504e-07	0.000101875587439574
Contig50828	ref|XP_011861886.1| PREDICTED: uncharacterized protein LOC105558678 [Vollenhovia emeryi]	1.0334180943307	-29.2506090582632	5.92363637308199	-4.93794811430069	7.89488398337837e-07	0.000105039870263598
Contig85552	ref|XP_011676855.1| PREDICTED: tubulin alpha chain, partial [Strongylocentrotus purpuratus]	0.295928330309106	-29.257679688045	5.93377126924083	-4.93070567780551	8.19330999903615e-07	0.000108296550321217
Contig90972	ref|XP_013298173.1| ATP synthase F1, gamma subunit [Necator americanus]	0.295928330309106	-29.257679688045	5.93377126924083	-4.93070567780551	8.19330999903615e-07	0.000108296550321217
Contig95792	#N/A	0.168693817315114	-29.2836217668153	5.93365955582644	-4.93517052862611	8.00807591994277e-07	0.00010624573739532
Contig80424	#N/A	2.68938751478273	-29.3097065819664	5.8977628771396	-4.96963123010153	6.70803579458288e-07	9.04413486323643e-05
Contig93169	ref|XP_009169498.1| hypothetical protein T265_06064 [Opisthorchis viverrini]	0.209153085245243	-29.3282965960639	5.93451112607143	-4.94199032961944	7.73290523197318e-07	0.000102981744633564
Contig109292	#N/A	0.753808875509464	-29.3355621459304	4.51061464711366	-6.50367287852936	7.83822474714813e-11	7.3834509473186e-07
Contig34521	ref|XP_011502300.1| PREDICTED: translation elongation factor 2 [Ceratosolen solmsi marchali]	0.352017857672969	-29.3493925722961	5.93320072709489	-4.94663739223712	7.55064401023628e-07	0.000100839635795308
Contig135940	ref|XP_011692809.1| PREDICTED: uncharacterized protein LOC105452946 isoform X2 [Wasmannia auropunctata]	0.193996493502947	-29.3788548998494	5.93454308151705	-4.95048304415363	7.40295071513165e-07	9.90544249238595e-05
Contig119719	ref|XP_011062706.1| PREDICTED: biotin--protein ligase isoform X1 [Acromyrmex echinatior]	1.79498938257645	-29.4603930811955	5.60866594527089	-5.25265604488994	1.49921351621119e-07	6.27549146314202e-05
Contig93150	#N/A	0.240292933834314	-29.4636990363777	5.93382448578651	-4.96538094562	6.85663453715569e-07	9.20933355700083e-05
Contig69581	ref|XP_011858733.1| PREDICTED: uncharacterized protein LOC105556257, partial [Vollenhovia emeryi]	1.69331804004502	-29.4803614066417	5.91281080413253	-4.98584554507267	6.16914145744281e-07	8.37349837187605e-05
Contig91636	ref|XP_015438077.1| PREDICTED: RNA-directed DNA polymerase from mobile element jockey-like [Dufourea novaeangliae]	1.85494424793589	-29.5048646436674	5.90848198321265	-4.99364552984972	5.92501010864558e-07	8.05761456517127e-05
Contig58040	#N/A	0.15502224620802	-29.559447574143	5.93461726960249	-4.98085154126931	6.33050916642669e-07	8.584279785879e-05
Contig126572	ref|XP_011303380.1| PREDICTED: uncharacterized protein LOC105266714 [Fopius arisanus]	30.087159370593	-29.565949996361	5.9061854590711	-5.00592983428106	5.55930066966517e-07	7.62633501671533e-05
Contig14783	ref|XP_011706161.1| PREDICTED: LOW QUALITY PROTEIN: cysteine-rich protein 2-binding protein-like [Wasmannia auropunctata]	1.21089696058419	-29.5950039316619	5.89905132098872	-5.01690904541946	5.25094108056733e-07	7.21032285579128e-05
Contig71565	#N/A	2.76212732410623	-29.597188371243	5.91477146468927	-5.00394453918226	5.61689232552859e-07	7.6978664880719e-05
Contig47665	ref|XP_011868751.1| PREDICTED: rab GTPase-activating protein 1-like isoform X1 [Vollenhovia emeryi]	6.30352642932156	-29.6543790533375	5.9093451333701	-5.0182174816426	5.21531178628895e-07	7.16836487808628e-05
Contig74832	ref|XP_012534005.1| PREDICTED: uncharacterized protein LOC105835358, partial [Monomorium pharaonis]	0.336392244011466	-29.6625003940036	5.93708399639196	-4.99613958839556	5.84893310840312e-07	7.96181793273638e-05
Contig84392	#N/A	0.154695424654378	-29.6649477658064	5.93461886749138	-4.99862727972388	5.77398882199023e-07	7.86737992845471e-05
Contig93916	ref|XP_013189495.1| PREDICTED: uncharacterized protein LOC106134085 [Amyelois transitella]	0.154695424654378	-29.6649477658064	5.93461886749138	-4.99862727972388	5.77398882199023e-07	7.86737992845471e-05
Contig53673	ref|XP_013399968.1| PREDICTED: trifunctional UDP-glucose 4,6-dehydratase/UDP-4-keto-6-deoxy-D-glucose 3,5-epimerase/UDP-4-keto-L-rhamnose-reductase RHM1-like [Lingula anatina]	0.290898658484053	-29.6711406293698	5.93424636548928	-4.99998463190252	5.73348841614939e-07	7.8348618253062e-05
Contig79223	ref|XP_012542605.1| PREDICTED: outer dense fiber protein 3-like, partial [Monomorium pharaonis]	0.167187007777886	-29.6764701147161	5.9349529078289	-5.00028737811372	5.72449256089087e-07	7.83014158157016e-05
Contig88645	#N/A	0.167187007777886	-29.6764701147161	5.9349529078289	-5.00028737811372	5.72449256089087e-07	7.83014158157016e-05
Contig58458	ref|XP_011871222.1| PREDICTED: methyltransferase-like protein 25 [Vollenhovia emeryi]	2.51289407138832	-29.6951772198299	5.90443836484432	-5.02929751907281	4.92280038983828e-07	6.85655871138426e-05
Contig70132	ref|XP_011861021.1| PREDICTED: uncharacterized protein LOC105558111 [Vollenhovia emeryi]	1.78813630186906	-29.6975064499146	4.92155291837453	-6.03417395737827	1.59777873940901e-09	7.28262395297659e-06
Contig34040	ref|XP_001948828.1| PREDICTED: 1,5-anhydro-D-fructose reductase [Acyrthosiphon pisum]	2.81424798308967	-29.7033421455807	5.90271409983115	-5.03214989633843	4.85009796034336e-07	6.79191567396071e-05
Contig69116	ref|XP_011873690.1| PREDICTED: tRNA-dihydrouridine(20a/20b) synthase [NAD(P)+]-like isoform X2 [Vollenhovia emeryi]	1.84392270309153	-29.7230839778445	5.90739878632968	-5.03150118231847	4.86654108258569e-07	6.80408191877276e-05
Contig30190	#N/A	3.41256591966902	-29.7431807080304	5.89521217507163	-5.04531131785244	4.52783521496839e-07	6.4623185087817e-05
Contig120359	ref|XP_011703476.1| PREDICTED: nephrin-like isoform X4 [Wasmannia auropunctata]	0.191010665185693	-29.7911081519774	5.93376590100432	-5.02060725835764	5.1508379358224e-07	7.08664019296882e-05
Contig125976	#N/A	0.191010665185693	-29.7911081519774	5.93376590100432	-5.02060725835764	5.1508379358224e-07	7.08664019296882e-05
Contig147434	#N/A	0.191010665185693	-29.7911081519774	5.93376590100432	-5.02060725835764	5.1508379358224e-07	7.08664019296882e-05
Contig56974	ref|XP_011870113.1| PREDICTED: UPF0565 protein C2orf69 homolog isoform X1 [Vollenhovia emeryi]	0.146748391772258	-29.8006425701029	5.93538324643418	-5.02084555163415	5.14445132059936e-07	7.08664019296882e-05
Contig80201	#N/A	0.191527954225544	-29.807064644769	5.93355437482614	-5.02347543509996	5.07447178829413e-07	7.01573033532872e-05
Contig98552	#N/A	0.191527954225544	-29.807064644769	5.93355437482614	-5.02347543509996	5.07447178829413e-07	7.01573033532872e-05
Contig76938	#N/A	0.218359570033134	-29.8161464040713	5.93186211890395	-5.02643955749607	4.99669871599048e-07	6.93534910091657e-05
Contig79192	ref|XP_008178822.1| PREDICTED: calcium/calmodulin-dependent protein kinase type 1 isoform X3 [Acyrthosiphon pisum]	0.260479197401662	-29.8170343465702	5.93426911417853	-5.02455041604525	5.04613232025423e-07	6.99022900446042e-05
Contig95309	#N/A	0.193330234540742	-29.8183437988112	5.93415087228688	-5.02487119733778	5.03770524862204e-07	6.98540371456867e-05
Contig65508	#N/A	0.226396310595886	-29.8429054098063	5.93418923790609	-5.0289777109192	4.931017000893e-07	6.85765658636986e-05
Contig103667	#N/A	0.272475603697216	-29.8475111200469	5.93082123438157	-5.03261014630113	4.83846439325824e-07	6.78234626363303e-05
Contig45166	ref|XP_011704625.1| PREDICTED: fibril-forming collagen alpha chain-like [Wasmannia auropunctata]	0.198494058141117	-29.8519637682102	5.93310046694156	-5.03142731773064	4.86841675327803e-07	6.80408191877276e-05
Contig146811	#N/A	0.15156915422671	-29.8566251486859	5.93571046577118	-5.03000025369446	4.90479187152489e-07	6.84814601848669e-05
Contig72225	#N/A	0.159892226094268	-29.8568977377951	5.93606466039177	-5.02974604320173	4.91129900983178e-07	6.85046215392104e-05
Contig101793	ref|XP_011858452.1| PREDICTED: uncharacterized protein LOC105556005, partial [Vollenhovia emeryi]	0.246336994838709	-29.8645469703152	5.93170718852952	-5.03473047827882	4.78521624014543e-07	6.76813512596425e-05
Contig58870	#N/A	0.174589244540157	-29.8654918018433	5.93432642086855	-5.03266751502223	4.83701619319614e-07	6.78234626363303e-05
Contig60734	#N/A	0.174589244540157	-29.8654918018433	5.93432642086855	-5.03266751502223	4.83701619319614e-07	6.78234626363303e-05
Contig84877	#N/A	0.174589244540157	-29.8654918018433	5.93432642086855	-5.03266751502223	4.83701619319614e-07	6.78234626363303e-05
Contig90875	ref|XP_012530614.1| PREDICTED: high affinity cAMP-specific and IBMX-insensitive 3',5'-cyclic phosphodiesterase 8A isoform X4 [Monomorium pharaonis]	0.174589244540157	-29.8654918018433	5.93432642086855	-5.03266751502223	4.83701619319614e-07	6.78234626363303e-05
Contig55640	ref|XP_001651061.1| AAEL015233-PA [Aedes aegypti]	0.307074359618172	-29.8759408151251	5.93158850996373	-5.03675208840604	4.73497392531715e-07	6.71050763014582e-05
Contig12929	#N/A	0.133633948905954	-29.8782603277889	5.93545766858756	-5.03385955996531	4.80701896175902e-07	6.77726259117254e-05
Contig86256	#N/A	0.133633948905954	-29.8782603277889	5.93545766858756	-5.03385955996531	4.80701896175902e-07	6.77726259117254e-05
Contig90128	ref|XP_011164375.1| PREDICTED: putative transcription factor SOX-15 [Solenopsis invicta]	2.77273649908158	-29.892990642877	5.90666133028266	-5.0608946359629	4.17293783862395e-07	6.27549146314202e-05
Contig52428	ref|XP_012217149.1| PREDICTED: uncharacterized protein LOC105668987 [Linepithema humile]	0.272957638500836	-29.9105989277386	5.93189018812336	-5.04233861031762	4.59876577201219e-07	6.53714091839041e-05
Contig122163	ref|XP_012537033.1| PREDICTED: RNA polymerase-associated protein Rtf1 [Monomorium pharaonis]	11.8843443888041	-29.9225794228972	5.88673149861382	-5.08305490575598	3.71412280882589e-07	6.27549146314202e-05
Contig95805	#N/A	0.245477199702382	-29.9275646130938	5.93269800169366	-5.04451172207825	4.54680959910655e-07	6.47631608795321e-05
Contig10194	ref|XP_012543357.1| PREDICTED: ATP-binding cassette sub-family E member 1 [Monomorium pharaonis]	2.6208395163546	-29.9324910178882	5.89810481695811	-5.07493371969703	3.87631095124392e-07	6.27549146314202e-05
Contig119674	ref|XP_012538814.1| PREDICTED: putative sodium-dependent multivitamin transporter [Monomorium pharaonis]	0.939713337907386	-29.9464887878555	5.91134894216222	-5.06593149564637	4.06408060783407e-07	6.27549146314202e-05
Contig136950	ref|XP_014670682.1| PREDICTED: lysosomal Pro-X carboxypeptidase-like isoform X2 [Priapulus caudatus]	0.321155993582314	-29.9521760470135	5.93799946166087	-5.0441527050317	4.55535399212949e-07	6.4819521956286e-05
Contig145359	#N/A	0.215395587503671	-29.9607012667858	5.93485155367705	-5.04826464416336	4.45841272855208e-07	6.36966980087183e-05
Contig65854	ref|XP_011646262.1| PREDICTED: uncharacterized protein LOC105432942 [Pogonomyrmex barbatus]	0.309273233755439	-29.9659799633624	5.93018688935113	-5.05312573153006	4.34637567625889e-07	6.27549146314202e-05
Contig76657	ref|XP_012542889.1| PREDICTED: NADH dehydrogenase [ubiquinone] flavoprotein 1, mitochondrial-like, partial [Monomorium pharaonis]	0.309273233755439	-29.9659799633624	5.93018688935113	-5.05312573153006	4.34637567625889e-07	6.27549146314202e-05
Contig41819	#N/A	0.136279159868795	-29.9709295145081	5.93546134010679	-5.04946924883329	4.43039244961676e-07	6.33604414932691e-05
Contig45224	#N/A	0.136279159868795	-29.9709295145081	5.93546134010679	-5.04946924883329	4.43039244961676e-07	6.33604414932691e-05
Contig14973	ref|XP_011171308.1| PREDICTED: ribosome biogenesis protein BMS1 homolog [Solenopsis invicta]	9.06571464683729	-29.9723650841319	5.90402935460557	-5.07659486156709	3.84258995025971e-07	6.27549146314202e-05
Contig52732	#N/A	0.204724196266164	-29.974295627377	5.93290468108154	-5.05221257354042	4.36721258763192e-07	6.27549146314202e-05
Contig76609	ref|XP_015119273.1| PREDICTED: sodium- and chloride-dependent glycine transporter 1-like [Diachasma alloeum]	0.204724196266164	-29.974295627377	5.93290468108154	-5.05221257354042	4.36721258763192e-07	6.27549146314202e-05
Contig138046	ref|XP_011169482.1| PREDICTED: UPF0668 protein C10orf76 homolog [Solenopsis invicta]	0.7653144183778	-29.977400343208	5.90295271840206	-5.07837378567433	3.80679192308783e-07	6.27549146314202e-05
Contig92193	#N/A	0.380834724050253	-29.9790373340722	5.91951478673432	-5.06444166695139	4.09599031203433e-07	6.27549146314202e-05
Contig59871	#N/A	0.212871621627655	-29.9794000195238	5.93407281198789	-5.05207822171646	4.37028641778081e-07	6.27549146314202e-05
Contig33624	ref|XP_011883286.1| PREDICTED: uncharacterized protein LOC105570580 [Vollenhovia emeryi]	0.92520331239439	-29.9848515959894	5.15196157530039	-5.82008447806428	5.8817891660279e-09	2.2461599021412e-05
Contig115573	#N/A	0.617667359504806	-29.986221435969	5.9103591314754	-5.07350243342717	3.90559477858759e-07	6.27549146314202e-05
Contig132764	ref|XP_011858172.1| PREDICTED: uncharacterized protein LOC105555741 [Vollenhovia emeryi]	0.798364144651484	-29.9862254336033	5.9149264467927	-5.06958551443407	3.98682979046494e-07	6.27549146314202e-05
Contig51419	ref|XP_011636330.1| PREDICTED: WD repeat and FYVE domain-containing protein 3 [Pogonomyrmex barbatus]	0.550641885429797	-29.9864285252849	5.91012174220079	-5.07374125835158	3.90069367446823e-07	6.27549146314202e-05
Contig53434	#N/A	3.30369918926001	-29.9872122157573	5.90568705278239	-5.07768392529862	3.82063589927003e-07	6.27549146314202e-05
Contig84179	ref|XP_012060738.1| PREDICTED: longitudinals lacking protein, isoforms A/B/D/L [Atta cephalotes]	2.22419754947479	-29.9894576494219	5.89456854431866	-5.08764253463921	3.62541893126745e-07	6.27549146314202e-05
Contig125398	ref|XP_011060171.1| PREDICTED: TGF-beta receptor type-1 isoform X4 [Acromyrmex echinatior]	0.429454478241399	-29.990848972853	5.91467090226784	-5.07058625381062	3.9659212231073e-07	6.27549146314202e-05
Contig34185	ref|XP_011867685.1| PREDICTED: organic cation transporter protein-like isoform X1 [Vollenhovia emeryi]	2.47889583855865	-29.991202945339	4.48902824100503	-6.68100117334622	2.37315327594433e-11	2.57938029562389e-07
Contig128145	ref|XP_011065217.1| PREDICTED: uncharacterized protein LOC105152556 [Acromyrmex echinatior]	2.62697840672109	-29.9926346410718	5.91077883713507	-5.07422718181232	3.89073999326142e-07	6.27549146314202e-05
Contig126879	ref|XP_011067131.1| PREDICTED: uncharacterized protein LOC105153781 isoform X2 [Acromyrmex echinatior]	3.53266650313791	-29.992983685551	5.92024500318729	-5.06617271234613	4.05893675273549e-07	6.27549146314202e-05
Contig36916	#N/A	7.24755165541394	-29.9945243543715	5.91332940166837	-5.07235811113598	3.92916083644717e-07	6.27549146314202e-05
Contig137016	ref|XP_011176356.1| PREDICTED: protein transport protein Sec24C [Solenopsis invicta]	6.68436891419207	-29.9951706998106	5.9036726514276	-5.08076454621129	3.75918823301007e-07	6.27549146314202e-05
Contig126916	ref|XP_012064166.1| PREDICTED: uncharacterized protein LOC105627497 [Atta cephalotes]	2.56957501753751	-29.9964529618837	5.90469379423452	-5.08010305143561	3.77230180554758e-07	6.27549146314202e-05
Contig141684	ref|XP_012063970.1| PREDICTED: uncharacterized protein KIAA0513 [Atta cephalotes]	2.32106431502443	-29.996595207409	5.91010185565002	-5.07547855181759	3.86521956961534e-07	6.27549146314202e-05
Contig87884	ref|XP_011877260.1| PREDICTED: LOW QUALITY PROTEIN: uncharacterized aarF domain-containing protein kinase 5 [Vollenhovia emeryi]	0.912459918122828	-29.997022512737	5.91551255113715	-5.07090843835174	3.95921232787288e-07	6.27549146314202e-05
Contig57153	#N/A	1.28694167661285	-29.9971960704567	5.91272483059397	-5.07332861411771	3.90916558987135e-07	6.27549146314202e-05
Contig59800	#N/A	0.68701557082692	-29.9973539908143	5.90372210813543	-5.08109179960848	3.75271698898002e-07	6.27549146314202e-05
Contig135269	#N/A	0.168040146667558	-29.9976341458796	5.93480615457257	-5.05452635934325	4.31460168628873e-07	6.27549146314202e-05
Contig41347	ref|NP_001171838.1| methylmalonyl-CoA mutase, mitochondrial [Saccoglossus kowalevskii]	0.241039791520767	-29.9983492069467	5.93113663597489	-5.05777409088737	4.24178506009216e-07	6.27549146314202e-05
Contig55488	#N/A	0.241039791520767	-29.9983492069467	5.93113663597489	-5.05777409088737	4.24178506009216e-07	6.27549146314202e-05
Contig60639	#N/A	0.210904839794761	-29.9986101412212	5.93246053728836	-5.05668937073674	4.26597244328683e-07	6.27549146314202e-05
Contig79353	#N/A	0.210904839794761	-29.9986101412212	5.93246053728836	-5.05668937073674	4.26597244328683e-07	6.27549146314202e-05
Contig87786	ref|XP_011861262.1| PREDICTED: hamartin isoform X1 [Vollenhovia emeryi]	3.78126696395842	-29.9987766096091	5.89536741292116	-5.08853384504236	3.60842388556471e-07	6.27549146314202e-05
Contig104323	#N/A	0.229793486299357	-29.9999055564606	5.93219605089433	-5.05713319301675	4.25605993347623e-07	6.27549146314202e-05
Contig61758	#N/A	3.85605274177784	-3.27838369826138	0.97015872370384	-3.37922405701334	0.000726907395097993	0.0443670990087089
Contig8265	ref|XP_011859007.1| PREDICTED: uncharacterized protein LOC105556520 [Vollenhovia emeryi]	21.552111859457	-3.3511575523289	1.00085667376946	-3.34828916083226	0.000813121239607746	0.0485594217214098
Contig14813	#N/A	52.1646563897496	-3.37235210336409	0.956150666856484	-3.5270091004081	0.000420282317622773	0.0281044158225958
Contig29544	ref|XP_011059103.1| PREDICTED: ankyrin-3-like isoform X12 [Acromyrmex echinatior]	9.05699062334983	-3.4103820448579	1.0159151019489	-3.35695575182957	0.000788057232832073	0.0472824300753603
Contig15739	ref|XP_012534658.1| PREDICTED: uncharacterized protein LOC105835681, partial [Monomorium pharaonis]	115.449644122952	-3.53683989983297	1.03485470318214	-3.41771640884204	0.000631488684644804	0.0394811755195827
Contig8809	#N/A	10.4169437423948	-3.61529174483462	0.971125674620003	-3.72278463984517	0.000197037580429305	0.0149200530556911
Contig31779	#N/A	35.1903928248407	-3.65401998027918	1.02265807338164	-3.57306129525422	0.000352832129460517	0.0243072264243699
Contig87459	ref|XP_011693474.1| PREDICTED: uncharacterized protein LOC105453329 [Wasmannia auropunctata]	153.099225895482	-3.97648546863413	1.18440980643387	-3.35735608320138	0.000786916976120837	0.0472742380845859
Contig116360	ref|XP_011859566.1| PREDICTED: uncharacterized protein LOC105557042 [Vollenhovia emeryi]	9.64804373458683	-5.10886528505583	1.23008686419845	-4.15325570392532	3.27778115905533e-05	0.00313993657241384
Contig98236	#N/A	3.95124266266612	-5.14838907345428	1.53558651197799	-3.35271834787259	0.000800220938717797	0.0479308257643105
Contig80494	#N/A	16.2680485620216	-5.17420166793222	1.44833814126692	-3.57250943029514	0.000353576746338524	0.0243379139437272
Contig110930	ref|XP_011061186.1| PREDICTED: protein patched homolog 1-like [Acromyrmex echinatior]	76.1409079108543	-5.33827557266337	1.36415543718197	-3.91324582753637	9.10637455838532e-05	0.00764854230717554
Contig29118	#N/A	5.66655218471525	-5.35443836507749	1.31423823611168	-4.07417636920928	4.61774778500617e-05	0.00427011720404462
Contig17979	ref|XP_011879210.1| PREDICTED: argininosuccinate lyase [Vollenhovia emeryi]	13.3653548721639	-5.46782845027354	1.52362295019851	-3.58870181731062	0.000332328679107583	0.0230974153329386
Contig14341	#N/A	130.414268869204	-5.61527514143792	1.47092286214711	-3.81751843413548	0.00013480071805543	0.0107367176206753
Contig22830	ref|XP_015595021.1| PREDICTED: uncharacterized protein LOC107267604 isoform X3 [Cephus cinctus]	10.2166390144507	-5.88082051788074	1.6008701743131	-3.67351494970795	0.000239236673458952	0.0176059501300675
Contig13004	ref|XP_011173704.1| PREDICTED: microtubule-associated protein futsch-like [Solenopsis invicta]	7.22500931661036	-5.90400192574686	1.67873469201005	-3.51693567414017	0.000436559565377383	0.0289598858728301
Contig74240	ref|XP_012541044.1| PREDICTED: solute carrier family 22 member 3-like [Monomorium pharaonis]	60.5816380903127	-6.22764058625529	1.73941486510257	-3.58030778694539	0.000343189719993195	0.0237355251423781
Contig14549	ref|XP_011875911.1| PREDICTED: alpha-(1,6)-fucosyltransferase [Vollenhovia emeryi]	37.7921304567943	-6.23902896998848	1.77206611654893	-3.52076534375529	0.00043030322777116	0.0286638508674082
Contig39652	ref|XP_011864607.1| PREDICTED: la-related protein 6 [Vollenhovia emeryi]	18.7993133856813	-6.23915703251637	1.49960082445651	-4.16054521360882	3.1748875297853e-05	0.00305171485235424
Contig9163	ref|XP_012218253.1| PREDICTED: THAP domain-containing protein 4-like [Linepithema humile]	5.78406513982591	-6.30774412907362	1.73178881420117	-3.64232871661272	0.000270182750451369	0.019537365450628
Contig16576	#N/A	42.2543607033278	-6.47249295432038	1.74366637863765	-3.71200192514891	0.000205626422943347	0.0154912535576701
Contig95998	ref|XP_011645954.1| PREDICTED: uncharacterized protein LOC105432711 isoform X2 [Pogonomyrmex barbatus]	2.88340753821407	-7.37144177838407	2.02704524930208	-3.63654525271308	0.000276319118252231	0.0199199298222885
Contig110270	ref|XP_012527141.1| PREDICTED: homer protein homolog 1 isoform X1 [Monomorium pharaonis]	6.34297564361507	-7.39264497784669	2.10970974918641	-3.50410523565983	0.00045814427158868	0.0301370629155799
Contig105449	#N/A	18.4456231891306	-7.39475099944472	2.06538231515048	-3.58033035588665	0.000343160077874445	0.0237355251423781
Contig97199	ref|XP_011635232.1| PREDICTED: ATP-dependent 6-phosphofructokinase isoform X2 [Pogonomyrmex barbatus]	39.5213343608828	-7.4957551504513	1.72031032811937	-4.3572110379908	1.31730240536393e-05	0.00139479613190522
Contig44559	ref|XP_012058062.1| PREDICTED: uncharacterized protein LOC105621200 [Atta cephalotes]	18.3941015914918	-8.10522136650086	1.77680282080596	-4.56168870940013	5.07438407170875e-06	0.000583397271098642
Contig73671	ref|XP_011882902.1| PREDICTED: rho GTPase-activating protein 26 isoform X1 [Vollenhovia emeryi]	12.3813873602366	-8.51351996629566	2.50300925603213	-3.40131381687003	0.00067062793249986	0.0414838107824716
Contig59348	ref|XP_015784498.1| PREDICTED: proton myo-inositol cotransporter-like isoform X2 [Tetranychus urticae]	14.5125573934186	-8.57039689665929	2.42113070943075	-3.53983238627969	0.000400381232345599	0.0268881497085248
Contig38824	ref|XP_011684328.1| PREDICTED: pheromone-binding protein Gp-9-like isoform X1 [Wasmannia auropunctata]	10.3986287616617	-9.11670512493487	2.50215905866322	-3.64353540729959	0.000268918639196388	0.0194658795914611
Contig70231	ref|XP_011879565.1| PREDICTED: arrestin domain-containing protein 2-like isoform X1 [Vollenhovia emeryi]	4.54048718513664	-9.11750951928792	2.47816173550754	-3.67914224025439	0.000234019725525599	0.0172670825898753
Contig24722	ref|XP_011866863.1| PREDICTED: LOW QUALITY PROTEIN: DIS3-like exonuclease 2 [Vollenhovia emeryi]	12.6144758850455	-9.851588674077	2.60613848037763	-3.78014781188814	0.000156735281962359	0.0122422471727117
Contig82602	#N/A	12.9301345383861	-9.92428887244494	2.92824889895094	-3.38915482082154	0.00070108414654362	0.0430326180078948
Contig11362	ref|XP_011163972.1| PREDICTED: xaa-Pro aminopeptidase 1-like, partial [Solenopsis invicta]	142.342574998794	0.710330886151199	0.208774779763243	3.40237880723302	0.000668019756801332	0.0413806170875747
Contig8302	ref|XP_012062935.1| PREDICTED: putative methyltransferase C9orf114 homolog [Atta cephalotes]	73.1554304874339	0.74872450665211	0.220265844676562	3.39918568742029	0.000675868134945123	0.0417022444818083
Contig16587	ref|XP_011166428.1| PREDICTED: fasciclin-1 isoform X1 [Solenopsis invicta]	23.0012805145851	1.8694428732644	0.477423979933773	3.91568700324547	9.01471385238304e-05	0.00757734695538469
Contig28710	ref|XP_012063775.1| PREDICTED: solute carrier family 23 member 1 [Atta cephalotes]	24.2928796778682	1.94899551675074	0.564561842816276	3.45222678711037	0.000555980211207854	0.0354665173377138
Contig135981	ref|XP_011170785.1| PREDICTED: glucose dehydrogenase [FAD, quinone]-like [Solenopsis invicta]	13.4151838642014	10.0355767039795	2.56791755739696	3.90806031722931	9.30400812783382e-05	0.00776967161015682
Contig9155	ref|XP_011169192.1| PREDICTED: GPI ethanolamine phosphate transferase 2 [Solenopsis invicta]	13.6129981915787	10.0441308875981	2.51604628878749	3.99202945206485	6.55102340544779e-05	0.00577082265660571
Contig75270	ref|XP_011065190.1| PREDICTED: uncharacterized protein LOC105152527 isoform X1 [Acromyrmex echinatior]	19.8884182096734	10.145047600644	2.53634583371614	3.99986763074022	6.33779230633223e-05	0.00560745798063761
Contig77496	ref|XP_011706512.1| PREDICTED: RAD50-interacting protein 1 isoform X2 [Wasmannia auropunctata]	25.8899442588763	10.2771609953939	2.68432882772394	3.82857751600724	0.000128886038154232	0.0103531611899253
Contig109774	ref|XP_011877174.1| PREDICTED: GMP synthase [glutamine-hydrolyzing] [Vollenhovia emeryi]	63.123754885779	10.6892896882674	2.72423566225604	3.92377569839724	8.71719018799138e-05	0.00735691359376582
Contig83289	ref|XP_014476583.1| PREDICTED: focal adhesion kinase 1 isoform X4 [Dinoponera quadriceps]	19.3897354993738	10.7091355428521	2.35789253400374	4.54182512070124	5.57692957356553e-06	0.000637543218411075
Contig134275	ref|XP_011631462.1| PREDICTED: uncharacterized protein LOC105423416 isoform X2 [Pogonomyrmex barbatus]	30.4233622334427	11.2294591346299	1.87492348520052	5.98928928207912	2.10759999112192e-09	9.30617362329855e-06
Contig46364	ref|XP_011703743.1| PREDICTED: transient receptor potential cation channel trpm isoform X3 [Wasmannia auropunctata]	65.6180796717353	12.1756937765494	3.43945401393431	3.54000772425561	0.000400115321165246	0.0268881497085248
Contig134936	ref|XP_011056905.1| PREDICTED: calcitonin gene-related peptide type 1 receptor-like isoform X3 [Acromyrmex echinatior]	7.52022619801247	12.3708530073022	3.63781567327181	3.40062667226236	0.000672315780449012	0.0415556442826352
Contig57137	ref|XP_011884018.1| PREDICTED: F-box/LRR-repeat protein 4-like [Vollenhovia emeryi]	13.3648841956915	12.5358915980169	2.78410936675263	4.50265774316138	6.71089103424075e-06	0.000755886559955079
Contig49804	ref|XP_011866663.1| PREDICTED: uncharacterized protein LOC105561363 isoform X1 [Vollenhovia emeryi]	5.34651139994264	12.8453354201024	3.6939762335966	3.47737359630917	0.00050635173959451	0.032714212048233
Contig123644	ref|XP_011861915.1| PREDICTED: serine/threonine-protein kinase fused [Vollenhovia emeryi]	24.8003096665615	13.2338534293398	3.40170131075568	3.89036315078466	0.000100094313389837	0.00827561509598821
Contig106247	ref|XP_011881376.1| PREDICTED: inosine-uridine preferring nucleoside hydrolase-like [Vollenhovia emeryi]	4.74833973959351	13.5823426706717	2.8755872271829	4.72332834917263	2.32015794863347e-06	0.000283101345136497
Contig73707	ref|XP_012523466.1| PREDICTED: exportin-5 [Monomorium pharaonis]	10.3214901273461	13.8854145089626	3.30880710542508	4.19650165952443	2.71069476597325e-05	0.00263783084261517
Contig83291	ref|XP_014476576.1| PREDICTED: focal adhesion kinase 1 isoform X2 [Dinoponera quadriceps]	21.4182096629915	13.8891141385359	4.00600806480556	3.46707093791385	0.000526163011162718	0.0338548519982963
Contig42580	ref|XP_012540504.1| PREDICTED: uncharacterized protein LOC105839040 isoform X1 [Monomorium pharaonis]	1.399082847801	14.8814903794784	4.19332744781059	3.54885006350941	0.000386917325600979	0.02620817706397
Contig87614	ref|XP_011864998.1| PREDICTED: SET and MYND domain-containing protein 4-like [Vollenhovia emeryi]	2.47245580212583	15.2720322803866	3.32735520705302	4.58984127934833	4.43583181946355e-06	0.000515859858925713
Contig78907	ref|XP_012529088.1| PREDICTED: NAD-dependent protein deacetylase sirtuin-2 [Monomorium pharaonis]	3.69972781165218	15.465364732702	4.36001436438482	3.54709031672746	0.000389511035155309	0.0263333687724113
Contig19580	ref|XP_012227922.1| PREDICTED: sodium-coupled monocarboxylate transporter 1 [Linepithema humile]	0.754288324050038	15.9382215854407	4.42952094665705	3.59818178475242	0.000320449616243396	0.0224819113338347
Contig60440	#N/A	2.01167713602753	16.4088831369573	4.16761008041812	3.93724048563369	8.24239940374869e-05	0.00702005008168462
Contig146613	ref|XP_006559932.1| PREDICTED: endophilin-A [Apis mellifera]	0.822636471708875	16.4204237976907	4.29357303026635	3.82441935468187	0.000131080642118833	0.010499604018971
Contig26750	#N/A	0.974104278419076	16.6041896027348	4.51121913155239	3.68064355078691	0.000232646039498009	0.0171925666542626
Contig116948	ref|XP_011871016.1| PREDICTED: mpv17-like protein 2 [Vollenhovia emeryi]	4.29212355074777	16.6192017937034	4.22258731752627	3.93578641339723	8.29247002226794e-05	0.00705844058274935
Contig110036	ref|XP_011875147.1| PREDICTED: recQ-mediated genome instability protein 1-like isoform X2 [Vollenhovia emeryi]	2.11640913652087	16.6924883312318	4.32030675960279	3.86372756844853	0.000111669761340159	0.00910479069133322
Contig9722	ref|XP_011698234.1| PREDICTED: organic cation transporter 1-like [Wasmannia auropunctata]	2.86187020742605	17.1689607960192	3.65011678681142	4.70367437503753	2.55520663809712e-06	0.00030911218522535
Contig95171	ref|XP_011873119.1| PREDICTED: nuclear pore complex protein Nup88 [Vollenhovia emeryi]	2.33007496746831	17.5271608989077	3.93029807689158	4.45949914128898	8.21514024931342e-06	0.000910411507299794
Contig73750	#N/A	4.26307013220844	17.6748618101452	3.03572422399286	5.8222883588871	5.80472832160468e-09	2.2461599021412e-05
Contig100114	#N/A	1.42006856924248	17.7143567101011	3.73331543105842	4.74493972910265	2.08568427316993e-06	0.000257156135031494
Contig114946	ref|XP_011690037.1| PREDICTED: putative ATPase N2B [Wasmannia auropunctata]	3.7394968356974	17.7414745602746	3.87807299505871	4.57481707613037	4.76636246587324e-06	0.000550222808284715
Contig119572	ref|XP_011882864.1| PREDICTED: peroxisomal hydratase-dehydrogenase-epimerase-like [Vollenhovia emeryi]	2.00958091701597	17.8191580154554	4.58945415924647	3.88263122305182	0.000103332220227476	0.00849856386582172
Contig81849	ref|XP_011170766.1| PREDICTED: mitochondrial inner membrane protein COX18 isoform X1 [Solenopsis invicta]	2.50705505498775	18.0112922015044	3.53225460165431	5.09909228883699	3.41286133240603e-07	6.27549146314202e-05
Contig115458	ref|XP_011684796.1| PREDICTED: uncharacterized protein KIAA1109 isoform X2 [Wasmannia auropunctata]	1.6973351287907	18.1485882459068	5.07425665011489	3.57660037662776	0.000348091691560406	0.0240510081869979
Contig121192	#N/A	0.893758131558666	18.3715729358272	4.25839992821294	4.31419623462584	1.60184617017206e-05	0.00165692575627234
Contig12650	ref|XP_011690198.1| PREDICTED: protein EFR3 homolog cmp44E [Wasmannia auropunctata]	4.73237653589178	18.3857941957952	4.84455392520959	3.7951469793991	0.000147556015158368	0.0116346106438794
Contig91964	ref|XP_011059726.1| PREDICTED: A-kinase anchor protein 9-like isoform X4 [Acromyrmex echinatior]	2.98277167180954	18.4189780362942	5.27373125756235	3.49258942800356	0.00047836138950601	0.0311766740097005
Contig11275	#N/A	0.804846437995352	18.489106807177	4.43816030444757	4.16593938453478	3.1007308903271e-05	0.00298449572622989
Contig69948	ref|XP_011636348.1| PREDICTED: probable RNA-binding protein 18 [Pogonomyrmex barbatus]	3.6675443356522	18.5249451558025	5.16713117980498	3.58515093021147	0.000336883322390342	0.0233794709252397
Contig47266	ref|XP_011878392.1| PREDICTED: uncharacterized protein LOC105567806 [Vollenhovia emeryi]	1.17369359573339	18.5359397710175	5.01990594418963	3.69248746432635	0.000222071290318983	0.016582253018475
Contig2196	ref|XP_012537409.1| PREDICTED: uncharacterized protein LOC105837304 [Monomorium pharaonis]	3.20075239925797	18.5583391932334	5.13577136464553	3.61354466068882	0.000302039301188389	0.0213599835535614
Contig98405	ref|XP_011703661.1| PREDICTED: folliculin isoform X1 [Wasmannia auropunctata]	2.65327681409926	18.5684113392115	4.7565100173358	3.9037889695462	9.46983605772781e-05	0.00788020863044032
Contig28869	ref|XP_015523501.1| PREDICTED: uncharacterized protein LOC107227008 [Neodiprion lecontei]	2.72027336511091	18.6701776892926	5.17320159793719	3.60901800091016	0.000307358284050039	0.0217035499557313
Contig114848	#N/A	5.19030450745354	18.7314316217938	4.03769609834027	4.63913854970253	3.49864453672917e-06	0.000414373828253329
Contig132689	ref|XP_012526984.1| PREDICTED: GRAM domain-containing protein 1B-like [Monomorium pharaonis]	2.53320487694679	19.0452601756118	5.27851944910598	3.60806858044967	0.000308484956456569	0.0217722272190029
Contig8300	#N/A	79.0483007722926	19.075719306505	2.80707834195659	6.7955778153341	1.07879268392753e-11	1.52430169860909e-07
Contig18964	ref|XP_011632255.1| PREDICTED: LOW QUALITY PROTEIN: uncharacterized protein LOC105423947, partial [Pogonomyrmex barbatus]	0.594267621379128	19.1296040291537	5.44999624718649	3.51002150488253	0.000448070454246446	0.0295915519309275
Contig89262	ref|XP_012063198.1| PREDICTED: uncharacterized protein LOC105626508 [Atta cephalotes]	31.8093534105716	19.156917932061	5.39565079850366	3.55043694402418	0.000384592254103316	0.0261007357003056
Contig96591	#N/A	2.00606314728722	19.1951515783505	4.39142498988747	4.3710530460051	1.23648745646967e-05	0.00131263687555819
Contig113765	ref|XP_011867503.1| PREDICTED: uncharacterized protein LOC105561796 isoform X2 [Vollenhovia emeryi]	2.72786692823674	19.2651064660277	5.36099467362425	3.59356940994752	0.000326178706285275	0.0227822557211418
Contig54408	ref|XP_011865488.1| PREDICTED: uncharacterized protein LOC105560735 [Vollenhovia emeryi]	0.652432049531975	19.7477613363387	5.91503238807825	3.33857197065232	0.000842102125282824	0.0498895194952148
Contig95903	ref|XP_011157055.1| PREDICTED: uncharacterized protein LOC105194040 [Solenopsis invicta]	0.819868346631118	19.7693840656425	5.91275299766591	3.34351596852541	0.000827239329499996	0.0491568617131741
Contig74827	ref|XP_011168766.1| PREDICTED: nose resistant to fluoxetine protein 6-like isoform X2 [Solenopsis invicta]	0.627420868867073	19.785867061062	5.91733837583594	3.34371060168869	0.000826659226534155	0.0491568617131741
Contig96513	#N/A	0.345115757592553	19.7867572154309	5.9231972395231	3.34055349084138	0.000836115724901994	0.0495972475153136
Contig14606	ref|XP_011065794.1| PREDICTED: probable nuclear hormone receptor HR3 isoform X2 [Acromyrmex echinatior]	0.699479515775576	19.7889986292756	5.91585950943604	3.34507582502785	0.000822600782050025	0.0489806248214591
Contig66956	ref|XP_011878002.1| PREDICTED: uncharacterized protein LOC105567617 [Vollenhovia emeryi]	50.1152765839207	19.7955198021504	3.14428199589622	6.29572024010143	3.05975780953201e-10	1.80139416338935e-06
Contig45504	ref|XP_011865367.1| PREDICTED: 1-phosphatidylinositol 4,5-bisphosphate phosphodiesterase gamma-1 isoform X1 [Vollenhovia emeryi]	2.0876584614338	19.7969695036527	5.89598967016661	3.35770084602154	0.000785936221805919	0.0472555022691536
Contig104472	#N/A	0.324762400487253	19.8251817914508	5.92446013369296	3.34632714949048	0.000818897172378614	0.0488012289184231
Contig112919	#N/A	0.349145893583677	19.8272892728191	5.92330902059118	3.34733325644391	0.000815930572323706	0.0486860397287258
Contig22819	#N/A	0.314576010732542	19.8338277552445	5.9310615652919	3.34406034011019	0.000825617781519499	0.0491188697580466
Contig89657	ref|XP_011163078.1| PREDICTED: putative nuclease HARBI1 [Solenopsis invicta]	0.912955363385593	19.8426250684324	5.90616870042209	3.35964414071247	0.000780429277416615	0.0470006642727149
Contig48397	#N/A	0.248641680447031	19.8460118595857	5.92518808999202	3.34943153840243	0.000809775648674562	0.0483800718100506
Contig96447	#N/A	0.90533326769739	19.8602232882017	5.90797545483603	3.36159542977533	0.00077493573607337	0.0467732143101063
Contig28948	#N/A	0.837155919415669	19.8749048964163	5.91540897541984	3.35985305141234	0.000779839399545118	0.0470006642727149
Contig108846	ref|XP_011862971.1| PREDICTED: dual specificity protein phosphatase 10 isoform X1 [Vollenhovia emeryi]	0.424996483618127	19.8800408952723	5.92742673442447	3.35390748565745	0.000796789981601025	0.0477455615056319
Contig39776	ref|XP_011638667.1| PREDICTED: leukotriene A-4 hydrolase-like [Pogonomyrmex barbatus]	0.335738301526556	19.8807213889797	5.93807257306487	3.34800916363986	0.000813943199934303	0.0485879730972189
Contig138381	#N/A	0.300016609173729	19.8879901936791	5.92606861941679	3.35601753386993	0.000790735553603846	0.0474229887595767
Contig94972	#N/A	0.329377304519262	19.9006653711092	5.92794746139992	3.35709206275751	0.000787668808769219	0.0472792012203332
Contig101792	#N/A	0.371555299135304	19.9023147110127	5.92242808187598	3.36049917970611	0.000778017617543561	0.0469191443901206
Contig128943	#N/A	0.413080000238818	19.9025402720631	5.91890457917911	3.36253778141214	0.000772295570609833	0.0466731027670308
Contig68470	ref|XP_011866550.1| PREDICTED: lysosomal-trafficking regulator isoform X5 [Vollenhovia emeryi]	7.06490822637573	19.9099011163034	5.90706198914407	3.3705251701935	0.000750250518069936	0.0455949021297754
Contig129172	ref|XP_011691488.1| PREDICTED: regulating synaptic membrane exocytosis protein 2 [Wasmannia auropunctata]	0.430111886053361	19.9141592970172	5.91897751869913	3.36445935706037	0.000766937790664312	0.0463895586504689
Contig15554	ref|XP_003690167.2| PREDICTED: broad-complex core protein isoforms 1/2/3/4/5-like [Apis florea]	0.453740422212278	19.9202905130416	5.91988102187602	3.36498156625602	0.00076548773037032	0.0463613887004437
Contig65092	#N/A	0.492848602804677	19.9321509787177	5.92647528523078	3.36323869069193	0.000770337266835037	0.0465752438134319
Contig36313	#N/A	0.578090361407428	19.9407107828143	5.92633135819358	3.36476473851649	0.000766089504088951	0.0463779557237603
Contig146031	#N/A	0.263789711408131	19.9477028891945	5.92884031522315	3.36452018078071	0.000766768765420512	0.0463895586504689
Contig131163	ref|XP_008190173.1| PREDICTED: uncharacterized protein LOC103311997 [Acyrthosiphon pisum]	0.300530454348549	19.9486022885322	5.92326436993252	3.367839259344	0.000757597521594948	0.0459984056386721
Contig129401	#N/A	0.347617459948842	19.9795691358173	5.92348311155766	3.37294270272063	0.000743694266810375	0.0452743510631218
Contig100976	#N/A	0.316686364455866	19.9826970695141	5.92514162953674	3.37252648441359	0.000744819228860739	0.0453233086047958
Contig38848	#N/A	0.582940501406956	19.9858596135272	5.91802089959195	3.3771187957287	0.000732494070339864	0.0446502220262346
Contig46058	#N/A	0.279840304508039	19.9902475670865	5.93580256454206	3.36774132052499	0.000757866680303394	0.0459984056386721
Contig22836	#N/A	0.82743054934914	19.9996163431922	5.90238861838478	3.3883936887682	0.00070303276433112	0.0430773722904138
Contig30152	#N/A	9.55915394152058	2.03101951746616	0.578331852845132	3.51185829982294	0.000444985187274905	0.0294221207329819
Contig124950	ref|XP_011867338.1| PREDICTED: transmembrane protease serine 9-like [Vollenhovia emeryi]	20.025405636066	2.57063440589156	0.718358191534888	3.57848554688155	0.000345590975815123	0.0238899061202296
Contig6086	#N/A	209.854178632015	2.61032636774607	0.56462726321601	4.62309657680742	3.78053599401493e-06	0.00044589181498024
Contig14603	#N/A	4.62291861457306	2.89077038072333	0.799465569867002	3.6158785189514	0.000299330734681299	0.0212109001094602
Contig75769	ref|XP_011705199.1| PREDICTED: uncharacterized protein LOC105460446 isoform X1 [Wasmannia auropunctata]	10.0373114883198	2.93269178240557	0.840320896247074	3.48996650625155	0.000483081088762863	0.0314262930934283
Contig146295	ref|XP_011877154.1| PREDICTED: uncharacterized protein LOC105567148 [Vollenhovia emeryi]	0.36516460087969	20.0059225451988	5.92209695345934	3.37818220512458	0.000729667163504136	0.0444971002165058
Contig124629	#N/A	0.397670585895854	20.0147703304455	5.92178690010962	3.37985318756996	0.000725245585767713	0.0443039453230526
Contig87380	#N/A	1.99927411413231	20.0174357632283	5.91209106281991	3.3858469956788	0.000709589352293259	0.0434602716562551
Contig95191	ref|XP_012532713.1| PREDICTED: Bardet-Biedl syndrome 7 protein homolog [Monomorium pharaonis]	1.41146633092895	20.0380215059226	5.91282328196604	3.38890924865589	0.0007017123007854	0.0430487487107764
Contig26717	ref|XP_011175768.1| PREDICTED: uncharacterized protein LOC105207821 [Solenopsis invicta]	4.64071810410182	20.0384624375991	5.90708380222671	3.39227664758124	0.000693144173151062	0.0426378721087182
Contig134977	ref|XP_012239765.1| PREDICTED: acetylcholine receptor subunit alpha-like, partial [Bombus impatiens]	0.310656456108565	20.0493929387531	5.92490132925676	3.38392014053476	0.00071458784482901	0.0437474517811112
Contig66416	ref|XP_011866459.1| PREDICTED: uncharacterized protein LOC105561260 isoform X2 [Vollenhovia emeryi]	2.1043564305493	20.0755928032442	5.89205479323918	3.40723117956742	0.000656255174437779	0.04077699533093
Contig41551	#N/A	0.553153278728429	20.0778415938891	5.91933515907417	3.39190822183981	0.00069407684891308	0.0426766651526856
Contig40718	ref|XP_011567215.1| PREDICTED: 1-deoxy-D-xylulose-5-phosphate synthase 1, chloroplastic-like [Plutella xylostella]	0.272017553571854	20.0806200955384	5.92576804421126	3.38869492455997	0.000702260952308539	0.0430487487107764
Contig132139	#N/A	0.470883045175189	20.0852976265551	5.91031879952456	3.39834420237547	0.000677950648543269	0.0418124804832904
Contig61915	#N/A	0.28548930872898	20.101570266041	5.92877185730357	3.39051168603801	0.000697622802244477	0.042857395255973
Contig31512	ref|XP_015119031.1| PREDICTED: uncharacterized protein LOC107042485 [Diachasma alloeum]	0.636031540008093	20.1108628123705	5.52605614815691	3.63927949213436	0.000273401936989933	0.0197297617420156
Contig85026	ref|XP_011870258.1| PREDICTED: calcium-dependent secretion activator isoform X2 [Vollenhovia emeryi]	14.4942040846392	20.1383544591497	3.93759962726533	5.11437331507872	3.14784266213602e-07	6.27549146314202e-05
Contig33499	#N/A	0.747665135763457	20.153856636511	5.90158413864325	3.41499098598707	0.000637841223345653	0.039825475623098
Contig145172	#N/A	0.53782255563807	20.1545810361638	5.91274491950683	3.40866743120805	0.0006528101110747	0.0405986400812156
Contig22946	ref|XP_014246261.1| PREDICTED: retrovirus-related Pol polyprotein from transposon TNT 1-94 [Cimex lectularius]	17.1470178676281	20.1561018589347	5.9002353722072	3.41615216807776	0.000635127454310297	0.0396735649476932
Contig84194	ref|XP_011693777.1| PREDICTED: nucleolar protein 6 [Wasmannia auropunctata]	1.69631530286193	20.1586985903429	5.90917267612457	3.41142486355021	0.000646243092958989	0.0402788753003204
Contig143936	ref|XP_011698896.1| PREDICTED: uncharacterized protein LOC105456502 isoform X4 [Wasmannia auropunctata]	0.303735908187676	20.1608334293221	5.92630038753946	3.40192567216335	0.000669128335845526	0.0414311246581794
Contig137853	#N/A	0.33572478415291	20.1797295885464	5.92416116800073	3.406343787125	0.000658392159186165	0.0408917964468253
Contig117574	ref|XP_012058965.1| PREDICTED: leukotriene A-4 hydrolase [Atta cephalotes]	0.790634598786645	20.1827009646065	5.92264032652577	3.40772018084808	0.000655080338387859	0.0407219034637876
Contig85411	#N/A	0.74745551285923	20.1974197467319	5.90189538135264	3.4221920996002	0.000621184088713988	0.0388713233760055
Contig81066	#N/A	0.586070381614644	20.2155378474094	5.90496404098148	3.42348195638619	0.000618243560579857	0.0387216136432855
Contig103951	ref|XP_012058254.1| PREDICTED: probable maleylacetoacetate isomerase 2 [Atta cephalotes]	0.366417384632513	20.2276256709974	5.92817313068052	3.41211790295258	0.000644602260467595	0.0402120819414083
Contig140097	ref|XP_011863749.1| PREDICTED: THUMP domain-containing protein 3-like [Vollenhovia emeryi]	3.31906956627152	20.2291177170522	4.00984052555062	5.04486839018975	4.53833641845863e-07	6.47077014045357e-05
Contig126156	ref|XP_011863792.1| PREDICTED: G-protein coupled receptor Mth2-like isoform X2 [Vollenhovia emeryi]	0.680074166555692	20.231453227272	5.33425891713824	3.79273926173158	0.000148994577489084	0.0117218746188614
Contig17853	ref|XP_011051086.1| PREDICTED: bifunctional arginine demethylase and lysyl-hydroxylase PSR [Acromyrmex echinatior]	0.295043736463473	20.2850746465994	5.92331974860773	3.42461246522566	0.000615676959007896	0.0386122091775138
Contig30598	#N/A	0.281458193207554	20.2856981570812	5.92527355659358	3.42358845770209	0.000618001345857442	0.0387216136432855
Contig77733	#N/A	0.281916909732816	20.3103169145497	5.9273063944893	3.42656774642736	0.000611261261223868	0.038386392189844
Contig34273	ref|XP_012523787.1| PREDICTED: ATP-binding cassette sub-family G member 4 [Monomorium pharaonis]	4.5395875857751	20.3227026422123	5.10978056501981	3.97721631753349	6.97267299648902e-05	0.00609664465584721
Contig91022	#N/A	0.322502298954554	20.3284335496284	5.92597232916986	3.43039629961891	0.000602700295701165	0.0379838285823763
Contig134532	ref|XP_012531277.1| PREDICTED: uncharacterized protein LOC105833810 [Monomorium pharaonis]	5.19948590684514	20.3549056419188	5.89046532507643	3.45556836660517	0.000549133911118318	0.0351567622289465
Contig102558	#N/A	0.282384198760167	20.3587026444739	5.92346645683364	3.4369575303304	0.000588287838781191	0.0371251928344198
Contig131462	#N/A	0.68039193439406	20.3592320499749	5.91430315471	3.44237207958495	0.00057663651492927	0.0364876890505871
Contig136609	ref|XP_011862052.1| PREDICTED: secretin receptor isoform X2 [Vollenhovia emeryi]	3.22504690534648	20.3638120450405	5.89502142177291	3.45440848948029	0.00055150134375692	0.0352604006193763
Contig108590	ref|XP_011067034.1| PREDICTED: WD repeat-containing protein 6 isoform X1 [Acromyrmex echinatior]	2.4194859710592	20.392442104128	5.90170248951942	3.45534905230178	0.0005495808278873	0.0351694394193803
Contig96189	#N/A	0.378987082569311	20.401476889218	5.91832255270768	3.44717218561941	0.000566487416833626	0.0359259302227742
Contig111512	#N/A	0.453649305339046	20.4072732844498	5.91671800293177	3.44908668527685	0.000562486099658843	0.0357846008210245
Contig142711	ref|XP_014249829.1| PREDICTED: uncharacterized protein K02A2.6-like [Cimex lectularius]	0.335240191159448	20.4079452923466	5.91965444362955	3.44748928956633	0.000565822840999888	0.0359160242429295
Contig18024	#N/A	0.353159287948022	20.4213875916887	5.91805990994305	3.45068956760277	0.000559156325394586	0.0356369469144244
Contig117021	#N/A	0.391561134083462	20.4220329487335	5.9229264821329	3.44796326787755	0.000564830846715581	0.0358691704037624
Contig138448	ref|XP_011060865.1| PREDICTED: arrestin domain-containing protein 2-like [Acromyrmex echinatior]	2.21755935028358	20.4273307093525	4.91393278150055	4.15702282014422	3.2242179536246e-05	0.00309072133102643
Contig134744	#N/A	0.515796138663021	20.4411908109049	5.91966558962067	3.45309891267266	0.000554185755008675	0.035383996667628
Contig118442	#N/A	0.761445263282958	20.4439622366929	5.90721649739956	3.4608452637029	0.000538482230253051	0.0345374142932662
Contig63368	#N/A	0.457015065769558	20.4442802057209	5.92709034637749	3.44929451230923	0.000562053327147834	0.0357731752099133
Contig100798	#N/A	0.208017017663611	20.4538107961683	5.93180174755144	3.4481615648418	0.000564416309623399	0.0358589619158531
Contig127891	#N/A	0.693558120477547	20.4830186101483	5.50360541921343	3.72174548317741	0.000197850393109603	0.0149705086941438
Contig146569	ref|XP_011165186.1| PREDICTED: insulin gene enhancer protein ISL-1 [Solenopsis invicta]	0.446539570130207	20.4861171344719	5.9259456816368	3.45702074150863	0.000546182808270401	0.0349836773618236
Contig102380	ref|XP_015513310.1| PREDICTED: RNA-directed DNA polymerase homolog [Neodiprion lecontei]	0.614906188287963	20.4881248167552	5.91761967954321	3.46222398975406	0.000535731094763851	0.0343812429006501
Contig114219	#N/A	0.40671576225997	20.5004056470993	5.9379747544578	3.45242384732422	0.000555574274103526	0.0354566297235799
Contig104157	#N/A	0.275500872432139	20.5329710208751	5.92660021925791	3.46454463963255	0.000531129981885107	0.0341433453368608
Contig93885	ref|XP_011696221.1| PREDICTED: probable multidrug resistance-associated protein lethal(2)03659 [Wasmannia auropunctata]	0.300170004583918	20.5368477966426	5.92599892517502	3.4655503748739	0.00052914738779462	0.0340313784493475
Contig67556	#N/A	0.273616274095051	20.5417002001296	5.92391095750882	3.46759097958622	0.000525145941380612	0.0338048045919164
Contig36998	#N/A	1.36011987019059	20.543304813491	4.82126878977897	4.26097479921521	2.03537185488035e-05	0.00205716693118047
Contig142515	ref|XP_014480360.1| PREDICTED: tyrosine-protein kinase Btk29A isoform X3 [Dinoponera quadriceps]	0.461604270160646	20.5659925841056	5.91939648690602	3.47433942456779	0.00051211277618116	0.033054059627938
Contig110791	ref|XP_012063362.1| PREDICTED: lymphocyte antigen 6D [Atta cephalotes]	0.39537349870208	20.5660422251228	5.92693000503459	3.46993168599142	0.000520590754218139	0.0335268513212217
Contig21545	#N/A	0.419708098200774	20.5725052638419	5.92145038057986	3.47423417264663	0.000512313712146642	0.033054059627938
Contig145775	#N/A	0.49229882904045	20.5816495335043	5.90707250747527	3.48423851365607	0.000493539456121727	0.0319888277668035
Contig149666	ref|XP_011645830.1| PREDICTED: vitellogenin receptor-like [Pogonomyrmex barbatus]	1.51636661733501	20.6070503993099	4.78293521715609	4.30845275206608	1.64400586165886e-05	0.00168940433625318
Contig83027	ref|XP_011637194.1| PREDICTED: intraflagellar transport protein 88 homolog [Pogonomyrmex barbatus]	1.93241002607091	20.611410016981	5.91356869723463	3.48544357430388	0.000491321833024132	0.0318743347294815
Contig89653	#N/A	0.583113069410562	20.6166758350154	5.91614641745366	3.4848150096814	0.000492477392455421	0.0319346388810342
Contig149764	ref|XP_012543005.1| PREDICTED: sorting nexin-2 isoform X1 [Monomorium pharaonis]	0.342753115208415	20.620387421056	5.92281237766519	3.48151960693792	0.000498577278586308	0.0322414067425216
Contig118367	ref|XP_015436399.1| PREDICTED: protein sprint [Dufourea novaeangliae]	0.462322648083867	20.6396970445421	5.92071203101613	3.48601602922408	0.000490271626678541	0.0318208130614597
Contig114410	#N/A	0.367975563056048	20.6405681537592	5.92506412514594	3.48360249236135	0.000494713659385809	0.0320208684975889
Contig35579	#N/A	0.466470264161255	20.6480026031548	5.91457336800237	3.49103837562652	0.000481147137841193	0.031343774612977
Contig116508	#N/A	0.262309448267739	20.6482484300139	5.92671629510736	3.48392725446627	0.00049411376833419	0.0319966971238846
Contig130635	#N/A	0.286495437167069	20.6505953796603	5.92708192584508	3.48410830793703	0.000493779626218719	0.0319897202410941
Contig107614	#N/A	0.339519246627842	20.6723883158477	5.92184503458216	3.49086951703834	0.000481451325807389	0.0313491373191736
Contig147234	#N/A	0.396802022472537	20.6929654117974	5.92423322410976	3.49293564736505	0.000477741623822444	0.0311506498482879
Contig119223	ref|XP_011859705.1| PREDICTED: UPF0329 protein ECU05_1680/ECU11_0050-like [Vollenhovia emeryi]	0.650341569040449	20.6981621675927	5.90850343079032	3.50311418281162	0.000459852294437043	0.0302212789056143
Contig138212	ref|XP_011168069.1| PREDICTED: uncharacterized protein LOC105201663 isoform X1 [Solenopsis invicta]	0.670685495319773	20.706377924326	5.91767038368108	3.49907591700733	0.000466873631360997	0.0305689728871246
Contig42445	ref|XP_011860358.1| PREDICTED: hexosaminidase D-like isoform X1 [Vollenhovia emeryi]	0.532528449211142	20.7070563170187	5.9375911164993	3.48745070361585	0.000487648812073895	0.0316651260108479
Contig117711	#N/A	0.350099385555716	20.7102920529451	5.92078587908394	3.49789579895253	0.000468944312092913	0.0306903309244059
Contig73805	#N/A	1.74581428426188	20.7175189318056	5.91475683960527	3.50268311844722	0.000460597061834609	0.0302420924935152
Contig138516	ref|XP_011700200.1| PREDICTED: hexosaminidase D-like isoform X1 [Wasmannia auropunctata]	2.842273117305	20.7396953537047	5.05399588448571	4.10362331662546	4.06729496737523e-05	0.00381604632805589
Contig106995	#N/A	0.290819643297841	20.7536682421144	5.92924655843506	3.50022014392197	0.000464874074479828	0.0304521613823719
Contig79240	#N/A	0.487931685837587	20.7639965094874	5.9256057652031	3.50411372815581	0.000458129660872506	0.0301370629155799
Contig138277	ref|XP_011697501.1| PREDICTED: cGMP-specific 3',5'-cyclic phosphodiesterase-like isoform X2 [Wasmannia auropunctata]	2.29438042234219	20.7778436389973	5.90650128192248	3.51779211537467	0.000435153113245264	0.0289073011011829
Contig55100	ref|XP_011686532.1| PREDICTED: patched domain-containing protein 1-like, partial [Wasmannia auropunctata]	0.331485988564955	20.8031381513286	5.92684438071519	3.50998555302346	0.00044813104136685	0.0295915519309275
Contig59163	#N/A	8.64993224170566	20.8168856250701	5.90053635495405	3.52796498026699	0.000418767554749107	0.0280296538054877
Contig65436	#N/A	0.353681707774603	20.862497057069	5.91927076650248	3.52450460200793	0.000424275444897289	0.0283312133920852
Contig47221	#N/A	0.290956232771158	20.8703393406447	5.92796202865213	3.52066009191191	0.000430474047861174	0.0286638508674082
Contig120818	#N/A	0.386850802849212	20.8832703794073	5.93790723556795	3.51694116309478	0.000436550537892264	0.0289598858728301
Contig44376	ref|XP_012522958.1| PREDICTED: myosin-IA [Monomorium pharaonis]	0.307244067879428	20.8861383499233	5.92391896527203	3.52572992175699	0.000422317411470767	0.0282271444127649
Contig104801	#N/A	0.547820597812718	20.8862243783695	5.91373264719458	3.53181748726461	0.000412714100515281	0.0276637875998613
Contig81159	#N/A	0.337733746781309	20.8982091017997	5.92777661881302	3.52547176549718	0.000422729236413814	0.0282413110721337
Contig46500	#N/A	0.468608438378949	20.9096730308072	5.92017545206336	3.53193468675317	0.000412531232054804	0.0276637875998613
Contig115550	ref|XP_012234439.1| PREDICTED: uncharacterized protein LOC105679152 [Linepithema humile]	0.980594240727806	20.9117824079685	5.07913221758388	4.11719591302866	3.83510048540518e-05	0.00361982761046289
Contig8093	ref|XP_011703950.1| PREDICTED: retinol dehydrogenase 12-like [Wasmannia auropunctata]	1.34482231790523	20.933790429897	5.91360338437793	3.53993818476196	0.000400220762477318	0.0268881497085248
Contig127814	#N/A	0.49628556383347	20.9394991506365	5.91530325576902	3.53988599489213	0.00040029991396147	0.0268881497085248
Contig53763	ref|XP_012530504.1| PREDICTED: 43 kDa receptor-associated protein of the synapse homolog isoform X1 [Monomorium pharaonis]	0.469809462634753	20.9612491513746	5.91800597805284	3.54194457205859	0.00039718892556043	0.0267755742437558
Contig140573	#N/A	0.279103836960296	20.9982818257491	5.92736569724703	3.54259934316214	0.000396204159081226	0.0267219375015274
Contig63871	#N/A	0.651665489381663	21.0094334084033	5.91839241215326	3.54985474860724	0.000385443756644507	0.0261389313413984
Contig126383	#N/A	0.358318544348832	21.0183528301899	5.92289006223191	3.54866502828006	0.000387189289713677	0.0262140321364032
Contig86605	ref|XP_012235579.1| PREDICTED: putative nuclease HARBI1 [Linepithema humile]	0.910125453329105	21.0220543108758	5.89200094666948	3.56789730706998	0.000359857478820173	0.024674766058796
Contig139398	ref|XP_011157912.1| PREDICTED: methyltransferase-like protein 4 [Solenopsis invicta]	3.99557171702722	21.0646079117656	5.05076414548842	4.17057841249259	3.03827487682854e-05	0.00292837056801665
Contig38788	ref|XP_011879068.1| PREDICTED: aminopeptidase N-like [Vollenhovia emeryi]	0.498929376586853	21.0746248125711	5.9215186095035	3.5589898812018	0.000372283872968709	0.0253751058364012
Contig61459	ref|XP_012216661.1| PREDICTED: hemicentin-2 [Linepithema humile]	0.87533097552459	21.0796444566073	5.90837962628838	3.56775390037851	0.000360054430566677	0.024674766058796
Contig106099	#N/A	0.683703652903107	21.085981757592	5.9049061651446	3.57092579761184	0.000355721668305409	0.024458591029951
Contig125405	#N/A	0.29463388132215	21.1363973303496	5.92414368672566	3.56784008762488	0.000359936050725516	0.024674766058796
Contig128899	#N/A	0.293644083973732	21.138691143091	5.92682319328826	3.5666140955629	0.000361623402768869	0.0247559602427485
Contig20350	ref|XP_011057750.1| PREDICTED: putative adenosylhomocysteinase 2 isoform X3 [Acromyrmex echinatior]	1.83770196940806	21.1508951447694	5.66976072893848	3.73047402808643	0.000191119845230314	0.014526444739918
Contig29970	#N/A	0.415227257690238	21.1735165006309	5.92232216741426	3.57520511415802	0.000349953423506186	0.0241543773448789
Contig96967	#N/A	0.376676211667482	21.1932678604446	5.9280291064271	3.57509510833324	0.000350100602293835	0.0241543773448789
Contig115911	ref|XP_011883987.1| PREDICTED: uncharacterized protein K02A2.6-like [Vollenhovia emeryi]	0.510916754287057	21.2075614682445	5.9150261157599	3.58537072418656	0.000336599710425934	0.0233712674614512
Contig51748	#N/A	0.365017935824677	21.2088041592723	5.92043856643915	3.58230288538039	0.000340578584132829	0.0235780167575778
Contig98906	#N/A	0.572991641919214	21.2250572130532	5.91532677719082	3.58814618575189	0.000333037551892942	0.023135303328327
Contig71003	ref|XP_011051107.1| PREDICTED: uncharacterized protein LOC105144108 [Acromyrmex echinatior]	0.842876102922061	21.2338122544458	5.90680280055332	3.5948063565719	0.000324632943718536	0.0227209865062702
Contig137499	ref|XP_011870308.1| PREDICTED: putative pre-mRNA-splicing factor ATP-dependent RNA helicase DHX16 [Vollenhovia emeryi]	3.15578206256602	21.2657809278556	4.51078253109855	4.71443275778507	2.42385029350276e-06	0.000294482179639776
Contig52562	#N/A	0.406261931674975	21.2985167209226	5.9240999713317	3.59523249506115	0.000324102005287128	0.0227043336842119
Contig92407	#N/A	0.371115383266564	21.3005686283564	5.92154970259344	3.59712739032276	0.000321750926720167	0.0225508138357041
Contig138696	ref|XP_014480450.1| PREDICTED: sterile alpha and TIR motif-containing protein 1 isoform X5 [Dinoponera quadriceps]	0.557683653037499	21.3227664840426	5.91070177604547	3.60748474410572	0.000309179710983945	0.0218103672605584
Contig76949	#N/A	0.573147674914088	21.3237213488654	5.92168958998453	3.60095223243897	0.000317053829899639	0.0222990318583023
Contig58412	ref|XP_011063608.1| PREDICTED: uncharacterized protein LOC105151536 [Acromyrmex echinatior]	0.219670987603961	21.3654032035945	5.92659632673594	3.60500395601626	0.000312148173467009	0.0219978057188868
Contig58399	#N/A	0.299238433128809	21.3795389317749	5.92711690292395	3.60707225484754	0.000309671448509628	0.0218341550199925
Contig46927	#N/A	1.20538319803021	21.4030025847288	4.26202724212961	5.02178924929498	5.1192337363204e-07	7.07069764653826e-05
Contig121941	#N/A	1.22791859458196	21.4039008548921	5.91744244253058	3.61708644617399	0.000297937820983284	0.0211320854932837
Contig143916	#N/A	0.425356774938756	21.4080689102306	5.92107330005376	3.6155723507149	0.00029968475825624	0.0212253419986627
Contig116731	#N/A	0.491317866335727	21.4233363919054	5.91915415905108	3.61932394667346	0.000295373685389664	0.0209831149444461
Contig147125	#N/A	1.02949397328655	21.4298744126004	5.92434616040274	3.61725561477718	0.000297743230614046	0.0211301985213827
Contig115429	#N/A	0.597026972704354	21.4474622461413	5.91447437218781	3.62626683226421	0.000287548225233189	0.0205407995858311
Contig38867	#N/A	0.78131788808273	21.4573245265369	5.91814757313692	3.62568257404291	0.000288199193483271	0.0205561238978323
Contig48336	#N/A	0.597546398967056	21.4721819955026	5.9179657480139	3.62830454074676	0.000285288617593353	0.020423346999779
Contig108099	#N/A	0.325982536245392	21.4867850475188	5.92595409773021	3.62587773937513	0.000287981590955817	0.0205509772006485
Contig35807	ref|XP_011055438.1| PREDICTED: glutamyl aminopeptidase-like [Acromyrmex echinatior]	0.29044956153429	21.4877275631416	5.92230528268108	3.62827084006955	0.000285325852477856	0.020423346999779
Contig146983	ref|XP_011879211.1| PREDICTED: sulfatase-modifying factor 1 [Vollenhovia emeryi]	1.95149199367994	21.4950879326382	5.91330845925585	3.6350357977678	0.000277942038805695	0.0199961182571936
Contig39976	#N/A	0.482322124050471	21.5017347323793	5.91580997838236	3.63462227673831	0.000278388200450555	0.0200078420951485
Contig32430	#N/A	0.445538958190864	21.5237091995898	5.91239998113561	3.64043523243765	0.00027217756886685	0.0196514429985587
Contig67541	ref|XP_011882584.1| PREDICTED: DNA polymerase epsilon catalytic subunit A [Vollenhovia emeryi]	0.416291688359598	21.5276253999691	5.92187140305666	3.63527404341427	0.000277685291956648	0.0199878240945484
Contig111496	ref|XP_011169952.1| PREDICTED: fatty acid synthase-like [Solenopsis invicta]	0.53943750493559	21.5277822343734	5.92751890746916	3.63183695749104	0.00028141090398966	0.0201840185284401
Contig122655	#N/A	0.868060211403682	21.5376048433305	5.93724625475981	3.62754110562014	0.000286133232142842	0.020459805762495
Contig68174	ref|XP_011882019.1| PREDICTED: uncharacterized protein LOC105569853 [Vollenhovia emeryi]	0.747097716900128	21.5518814259217	5.90273226037506	3.6511704199425	0.000261047941072179	0.0189641598610158
Contig122292	ref|XP_011706916.1| PREDICTED: putative odorant receptor 71a [Wasmannia auropunctata]	0.327834029823103	21.5776443303268	5.92679129936952	3.64069582349258	0.000271902214845945	0.0196415987991244
Contig130945	ref|XP_011693383.1| PREDICTED: tyrosine aminotransferase isoform X3 [Wasmannia auropunctata]	1.73835583027093	21.5967252549157	5.90320866955612	3.65847227564457	0.000253723181299569	0.0185206082476967
Contig121725	ref|XP_011052092.1| PREDICTED: protein cramped-like [Acromyrmex echinatior]	5.30182435692089	21.6105962470837	4.01589703027869	5.38126253839333	7.39652271535754e-08	6.27549146314202e-05
Contig64048	ref|XP_003695175.1| PREDICTED: formin-like protein CG32138, partial [Apis florea]	1.22792363190862	21.6266227204724	5.89372917309914	3.66942933502665	0.000243092521431486	0.0178710946933947
Contig106685	ref|XP_011878394.1| PREDICTED: uncharacterized protein LOC105567808 [Vollenhovia emeryi]	0.717023889763611	21.6284228217994	5.9372559599745	3.64283146416553	0.000269655404198496	0.0195092164091321
Contig131360	#N/A	0.349678578384023	21.6521583296804	5.92578062686815	3.6538913086838	0.00025829564514541	0.0188022763195655
Contig138243	ref|XP_011050396.1| PREDICTED: zinc finger protein 346-like [Acromyrmex echinatior]	1.16926844271018	21.6738734741908	5.91247640219593	3.66578604290766	0.000246580022431343	0.0180898325179032
Contig109359	#N/A	0.243874698102671	21.6898383642394	5.92872460675228	3.65843242904833	0.000253762624595998	0.0185206082476967
Contig148737	ref|XP_011166816.1| PREDICTED: tetratricopeptide repeat protein 5-like [Solenopsis invicta]	2.73928664063431	21.6989489818776	5.89222064760951	3.68264365501671	0.000230827714941639	0.0170939536887362
Contig11469	ref|XP_011860245.1| PREDICTED: uncharacterized protein LOC105557580 isoform X2 [Vollenhovia emeryi]	34.4544915140177	21.7188560120273	5.88211068123	3.69235758880444	0.000222184761437917	0.016582253018475
Contig36655	#N/A	0.537443715946942	21.7301569520488	5.92243352470017	3.66912635851813	0.000243380768874532	0.0178829810190664
Contig37895	ref|XP_011688840.1| PREDICTED: uncharacterized protein LOC105450605 [Wasmannia auropunctata]	0.253912112085253	21.7514456179851	5.92943780954877	3.66838245321614	0.000244089870259049	0.0179257621611189
Contig134827	ref|XP_011870975.1| PREDICTED: histone acetyltransferase KAT2A-like [Vollenhovia emeryi]	6.99264240909708	21.7683727265377	5.15490022111483	4.22285045157089	2.41231891403357e-05	0.00238692875067368
Contig94032	ref|XP_011631079.1| PREDICTED: LOW QUALITY PROTEIN: transcription factor Adf-1-like [Pogonomyrmex barbatus]	0.869821757402151	21.7961706167138	5.92565566326398	3.67827154585421	0.000234819886699008	0.0173169861852347
Contig102014	ref|XP_011698633.1| PREDICTED: DET1 homolog [Wasmannia auropunctata]	1.51145502934001	21.7993251610633	5.93711368186108	3.67170418644063	0.000240938468437463	0.0177219587583593
Contig113374	#N/A	0.684151547374829	21.8022419853637	5.90019309080466	3.69517431884426	0.000219735978117844	0.0164362278984209
Contig44441	#N/A	0.288085987942371	21.802342025737	5.92423244583685	3.68019692425441	0.000233053906120726	0.0172137050565291
Contig99985	#N/A	1.13402200346791	21.8055174228247	5.91028777302533	3.68941720948774	0.00022476835728892	0.0167065200314847
Contig50657	#N/A	0.433454830113934	21.807812982529	5.92017615935451	3.68364258014017	0.000229924579384459	0.0170449387687754
Contig51745	#N/A	0.527532035513936	21.8198195205338	5.92033536305465	3.68557153986555	0.000228189970193201	0.0169341167113386
Contig108615	#N/A	0.426596754676837	21.8399470879391	5.92265351535232	3.68752739482851	0.000226443721532533	0.0168221969092441
Contig150113	#N/A	0.433730264359181	21.8440030817448	5.92043449978129	3.6895945867743	0.000224611706965317	0.0167036633468834
Contig115513	#N/A	0.289743336953239	21.8446957984375	5.92774670620061	3.68516012595263	0.000228558898800442	0.0169525914560662
Contig93805	ref|XP_011864274.1| PREDICTED: Williams-Beuren syndrome chromosomal region 16 protein homolog [Vollenhovia emeryi]	5.28607661790251	21.8459176878372	5.86993594475047	3.72166202382058	0.000197915810248346	0.0149705086941438
Contig110344	ref|XP_011165057.1| PREDICTED: uncharacterized protein LOC105199598 [Solenopsis invicta]	2.94959386391705	21.8486059597347	5.91924720030774	3.69111226822877	0.000223275553765754	0.0166393280171095
Contig99542	ref|XP_012535551.1| PREDICTED: uncharacterized protein LOC105836216 [Monomorium pharaonis]	4.31412939731168	21.8630005930458	4.01256587493791	5.44863343667451	5.07583031184917e-08	6.27549146314202e-05
Contig37399	ref|XP_012059510.1| PREDICTED: CCR4-NOT transcription complex subunit 10 [Atta cephalotes]	0.562801881683533	21.8704641795601	5.91660233550429	3.69645667215456	0.000218629551433874	0.0163708000683371
Contig140550	#N/A	0.43774114924562	21.8785569686388	5.91518184431698	3.69871249007478	0.000216695893779238	0.0162604778031466
Contig67667	#N/A	0.891532576562417	21.8985696219242	5.26645407462236	4.15812410241031	3.20871699932577e-05	0.00308004134411504
Contig89063	#N/A	0.582940749235883	21.9474896826717	5.91509550689631	3.7104201710832	0.000206915537942155	0.0155679152101239
Contig43942	ref|XP_011637353.1| PREDICTED: protein enhancer of sevenless 2B isoform X2 [Pogonomyrmex barbatus]	1.45459519148451	21.9565636608241	5.91511931490723	3.71193926815464	0.000205677343993072	0.0154912535576701
Contig36383	ref|XP_012059565.1| PREDICTED: dedicator of cytokinesis protein 3 [Atta cephalotes]	1.74509624688079	21.9631869345331	5.91070567701732	3.71583160026608	0.000202536448383344	0.0152954529915667
Contig127527	ref|XP_011876813.1| PREDICTED: solute carrier family 25 member 35-like isoform X1 [Vollenhovia emeryi]	0.331992618193587	21.9755084894266	5.92715402636182	3.70759868761425	0.000209233887380952	0.0157339651864111
Contig107460	ref|XP_011696904.1| PREDICTED: leupaxin isoform X4 [Wasmannia auropunctata]	0.674706123721384	21.9922069748683	5.91171311935162	3.7201072736223	0.000199138176858488	0.0150549100992904
Contig91223	#N/A	0.248710427688669	22.0100744026911	5.92731313487285	3.71333079624168	0.000204549240381503	0.0154227289317958
Contig113163	ref|XP_011644058.1| PREDICTED: uncharacterized protein LOC105431518 [Pogonomyrmex barbatus]	0.416364462300405	22.0339495523113	5.91833729937942	3.72299658463564	0.000196872186097314	0.0149155224016044
Contig83026	ref|XP_011637194.1| PREDICTED: intraflagellar transport protein 88 homolog [Pogonomyrmex barbatus]	2.88506268691257	22.0721900277154	5.41567009645924	4.07561569197987	4.58927583666057e-05	0.00425213710093527
Contig149927	ref|XP_011065520.1| PREDICTED: protein abnormal spindle [Acromyrmex echinatior]	0.623865447603283	22.0792889985638	5.91599093038544	3.7321370601096	0.000189862141854634	0.0144541762163977
Contig122785	ref|XP_014214078.1| PREDICTED: uncharacterized protein LOC106643444 [Copidosoma floridanum]	1.15706577330172	22.0940039338215	5.91743857504294	3.73371073541919	0.000188679183131307	0.0143796130199052
Contig33672	ref|XP_012541827.1| PREDICTED: insulin-degrading enzyme isoform X1 [Monomorium pharaonis]	0.411397091466644	22.1006406490741	5.92170763896449	3.73213978070332	0.000189860090735698	0.0144541762163977
Contig341	#N/A	3.96165334407779	22.1011939001616	3.42762129080416	6.44796843789483	1.13359363644165e-10	9.42196353225269e-07
Contig33293	ref|XP_011867784.1| PREDICTED: putative methyltransferase NSUN6 isoform X1 [Vollenhovia emeryi]	0.517865964241182	22.1144603113966	5.91682228249768	3.73755696141365	0.000185817001353685	0.014184432652767
Contig12191	ref|XP_012526213.1| PREDICTED: proto-oncogene tyrosine-protein kinase ROS isoform X3 [Monomorium pharaonis]	0.646542266600872	22.1329970723959	5.91021197219336	3.74487364861501	0.000180484584417077	0.0138221844576584
Contig128672	#N/A	0.486760599545335	22.1369059883721	5.9174519184004	3.74095240546646	0.000183324237896241	0.014001710725419
Contig114389	#N/A	0.336684766103313	22.1725299517593	5.91866300617064	3.74620584558418	0.000179529293799132	0.0137639449950819
Contig115879	ref|XP_011156130.1| PREDICTED: epidermal growth factor receptor-like [Solenopsis invicta]	1.15823432292025	22.1939315053914	4.15179185291455	5.34562721149213	9.0104487915247e-08	6.27549146314202e-05
Contig119710	ref|XP_011700874.1| PREDICTED: receptor-type tyrosine-protein phosphatase S-like [Wasmannia auropunctata]	0.919603480711591	22.1977834182489	5.92030290137129	3.74943373473464	0.000177234320038449	0.0136472358138816
Contig99566	ref|XP_011064823.1| PREDICTED: F-box/SPRY domain-containing protein 1 isoform X2 [Acromyrmex echinatior]	0.560914682161896	22.2126377889642	5.91955374700731	3.7524176210401	0.000175137391581303	0.0135226164034226
Contig38185	ref|XP_014675694.1| PREDICTED: 60S ribosomal protein L10a-2-like [Priapulus caudatus]	0.223408814591758	22.2334697011655	5.93917571009289	3.7435278541065	0.000181454476786379	0.0138739032502625
Contig83689	#N/A	0.223408814591758	22.2334697011655	5.93917571009289	3.7435278541065	0.000181454476786379	0.0138739032502625
Contig97550	#N/A	0.223408814591758	22.2334697011655	5.93917571009289	3.7435278541065	0.000181454476786379	0.0138739032502625
Contig23845	ref|XP_011051107.1| PREDICTED: uncharacterized protein LOC105144108 [Acromyrmex echinatior]	1.37303942058116	22.2369075991782	5.89678321025264	3.77102342180652	0.000162579411084308	0.0126289076679382
Contig34835	ref|XP_011880162.1| PREDICTED: spatacsin isoform X1 [Vollenhovia emeryi]	3.3278586027059	22.2372573754061	5.93704026455675	3.74551230655437	0.000180026021304232	0.0137945426964339
Contig51566	#N/A	1.11794905219759	22.2420654630561	5.89292518081746	3.77436753065491	0.000160414120093293	0.0125067433555105
Contig88974	#N/A	0.387646118091259	22.2469973141363	5.93805654300488	3.74651153168011	0.000179310764300564	0.0137621255097103
Contig65871	ref|XP_014364204.1| PREDICTED: 40S ribosomal protein S27 [Papilio machaon]	0.272230505559798	22.2604313613119	5.93893365351796	3.74822024626017	0.000178093834243921	0.0136910361790878
Contig80028	#N/A	0.272230505559798	22.2604313613119	5.93893365351796	3.74822024626017	0.000178093834243921	0.0136910361790878
Contig93370	#N/A	0.272230505559798	22.2604313613119	5.93893365351796	3.74822024626017	0.000178093834243921	0.0136910361790878
Contig54665	ref|XP_011692056.1| PREDICTED: tyrosine-protein phosphatase non-receptor type 11-like [Wasmannia auropunctata]	0.502847639201934	22.2776107463101	5.92003907158062	3.7630850872682	0.000167830067918535	0.0130010335014722
Contig116475	ref|XP_011867736.1| PREDICTED: PCTP-like protein isoform X5 [Vollenhovia emeryi]	1.06905081220844	22.2827656359871	5.9171254479934	3.7658092314983	0.000166010514446748	0.0128741973983436
Contig100207	#N/A	0.41242376408784	22.3106185469759	5.91907438267452	3.76927490762414	0.000163722483382927	0.0127037318696087
Contig124242	ref|XP_011858704.1| PREDICTED: uncharacterized protein LOC105556230, partial [Vollenhovia emeryi]	0.905378713033483	22.3281077739686	5.91587148843766	3.77427194245311	0.000160475634327272	0.0125067433555105
Contig38515	#N/A	0.386888459541685	22.3370767470612	5.92036277570908	3.7729236523662	0.000161345672621665	0.0125468681917575
Contig72218	#N/A	0.361679382464436	22.3559665353769	5.92421065458736	3.77366164690072	0.000160868903698536	0.0125235776781774
Contig118392	ref|XP_011862332.1| PREDICTED: uncharacterized protein LOC105558964 [Vollenhovia emeryi]	0.220716621584658	22.3686464244603	5.93361460214844	3.7698178807166	0.000163366713599845	0.0126830915008337
Contig41210	#N/A	1.1789696065821	22.4043063783299	3.75311987838303	5.96951525779198	2.37959508628536e-09	9.88910726196654e-06
Contig105965	ref|XP_011874477.1| PREDICTED: uncharacterized protein LOC105565685 isoform X2 [Vollenhovia emeryi]	0.955486749349109	22.4082884693972	5.92038792108809	3.78493584678465	0.000153748234679512	0.012035548097236
Contig51878	#N/A	0.579744248332746	22.4251248358371	5.92003431720825	3.78800588548146	0.000151861253070088	0.0119010202301965
Contig52440	#N/A	0.889763326493838	22.4464586654789	5.92516172026102	3.78832844152144	0.000151664266482441	0.0118987817108104
Contig52030	ref|XP_011053020.1| PREDICTED: trithorax group protein osa-like [Acromyrmex echinatior]	2.5316599922144	22.4543778703698	5.89112870723062	3.81155785016374	0.000138093727347802	0.0109490249983485
Contig9599	#N/A	0.342366625001458	22.4567457934792	5.92190100234821	3.79215150414951	0.000149347750380769	0.0117431213609079
Contig34513	#N/A	0.359524067371657	22.472772834242	5.93829904717635	3.78437876834912	0.0001540929968018	0.0120491854837321
Contig45533	ref|XP_011872815.1| PREDICTED: uncharacterized protein LOC105564777 [Vollenhovia emeryi]	0.415293022425734	22.485582033911	5.92850990896008	3.79278813381544	0.000148965246575078	0.0117218746188614
Contig74995	ref|XP_011312957.1| PREDICTED: elongation factor 1-gamma [Fopius arisanus]	0.529427409926259	22.5040330044553	5.93786017350773	3.78992302729844	0.000150693973852382	0.0118358012359199
Contig123743	#N/A	0.371226566094619	22.5358518457377	5.92538380307628	3.80327293466421	0.000142796879675727	0.0112908621754567
Contig7283	ref|XP_011874189.1| PREDICTED: uncharacterized protein LOC105565515 isoform X3 [Vollenhovia emeryi]	1.16331144827975	22.5760337472739	5.91225767948885	3.81851315878806	0.000134258424135105	0.0106995558685945
Contig60825	#N/A	0.744496541131008	22.5913409222961	5.26354034269494	4.29204289345852	1.77036737930818e-05	0.00180611985266504
Contig29537	ref|XP_011690595.1| PREDICTED: LOW QUALITY PROTEIN: dynein heavy chain 8, axonemal [Wasmannia auropunctata]	0.905195654260101	22.5936128783444	5.91645254043572	3.81877699921183	0.00013411493155733	0.0106941520791513
Contig101864	ref|XP_011867780.1| PREDICTED: cleft lip and palate transmembrane protein 1-like protein [Vollenhovia emeryi]	1.59548901302098	22.6027368365466	5.90769879948825	3.8259798956752	0.000130252920363122	0.0104451457937276
Contig65328	ref|XP_011647606.1| PREDICTED: phospholipase A1 member A, partial [Pogonomyrmex barbatus]	0.314027852918527	22.6042441074591	5.92149885837772	3.81731798790751	0.000134910244833856	0.0107393875291771
Contig35128	ref|XP_012533031.1| PREDICTED: regulating synaptic membrane exocytosis protein 2 isoform X1 [Monomorium pharaonis]	0.848859594569961	22.6348121536384	5.91811110774093	3.82466833446771	0.000130948250033429	0.0104949488854075
Contig74993	#N/A	0.181874621209956	22.6422250817847	5.93916317604154	3.81235948746499	0.000137646482543643	0.0109202891880792
Contig96566	#N/A	0.181874621209956	22.6422250817847	5.93916317604154	3.81235948746499	0.000137646482543643	0.0109202891880792
Contig148298	ref|XP_012064320.1| PREDICTED: peripheral plasma membrane protein CASK-like [Atta cephalotes]	0.367114120315065	22.6464689526959	5.92823885002028	3.82010062779748	0.000133397239443743	0.0106489433568828
Contig37815	#N/A	0.21305899446754	22.6618223117922	5.93916682990509	3.8156568018404	0.000135821173501453	0.0107997323310269
Contig94396	#N/A	0.21305899446754	22.6618223117922	5.93916682990509	3.8156568018404	0.000135821173501453	0.0107997323310269
Contig78721	ref|XP_011065681.1| PREDICTED: uncharacterized protein LOC105152859 isoform X2 [Acromyrmex echinatior]	0.412695340591343	22.6859922532104	5.9258672949425	3.82829906983776	0.000129031908595982	0.0103589895391401
Contig45232	ref|XP_012151025.1| PREDICTED: uncharacterized protein K02A2.6-like [Megachile rotundata]	0.261880685435579	22.689656124705	5.93869206196521	3.82064870310798	0.000133101125149291	0.0106313112946407
Contig77367	#N/A	0.261880685435579	22.689656124705	5.93869206196521	3.82064870310798	0.000133101125149291	0.0106313112946407
Contig82587	#N/A	0.261880685435579	22.689656124705	5.93869206196521	3.82064870310798	0.000133101125149291	0.0106313112946407
Contig71123	ref|XP_012147427.1| PREDICTED: RNA binding protein fox-1 homolog 2 [Megachile rotundata]	1.77552599364401	22.7176070263764	5.89907105329991	3.85104821100065	0.000117613340498727	0.0095343730191903
Contig39036	ref|XP_011494626.1| PREDICTED: 40S ribosomal protein S15 [Ceratosolen solmsi marchali]	0.310702376403618	22.7473171251546	5.93844710610532	3.83051607915613	0.000127874776430677	0.0102777714933591
Contig84883	ref|XP_011056999.1| PREDICTED: uncharacterized protein LOC105147579 isoform X1 [Acromyrmex echinatior]	0.310702376403618	22.7473171251546	5.93844710610532	3.83051607915613	0.000127874776430677	0.0102777714933591
Contig3398	#N/A	0.235077176347549	22.7509313176813	5.92846441415818	3.83757575795651	0.000124254907284627	0.0100210306133539
Contig116865	ref|XP_002169704.3| PREDICTED: uncharacterized protein LOC100209634 [Hydra vulgaris]	0.27627598376205	22.754568040168	5.9259782216265	3.83979947093403	0.000123134845591535	0.00994204815859833
Contig2545	ref|NP_001164361.1| ATP synthase subunit beta, mitochondrial [Tribolium castaneum]	0.741837538535348	22.7573114198767	5.93323021153605	3.83556858718029	0.000125274139249584	0.0100917104068121
Contig117332	ref|XP_011873981.1| PREDICTED: translational activator GCN1 [Vollenhovia emeryi]	2.57768816003965	22.7669443846749	4.85864303158346	4.68586480560088	2.78780249482826e-06	0.00033581255678751
Contig55687	#N/A	0.292717273534477	22.7767506954137	5.92886083997985	3.84167402645449	0.000122198051591151	0.00987205151267858
Contig104470	#N/A	0.410030441005058	22.7817892254609	5.92585182040481	3.84447500813555	0.000120810795847116	0.00976556236888445
Contig110922	ref|XP_011880242.1| PREDICTED: jmjC domain-containing histone demethylation protein 1-like [Vollenhovia emeryi]	1.97117890330418	22.7906287278195	4.94694199103008	4.60701353869604	4.08493414633631e-06	0.000479791305132903
Contig92429	ref|XP_012541125.1| PREDICTED: eukaryotic translation initiation factor 3 subunit C [Monomorium pharaonis]	0.459396874873856	22.8100526143794	5.92430946241013	3.85024664209554	0.000117998937364024	0.00956014670454385
Contig122855	ref|XP_011863845.1| PREDICTED: glutamate receptor U1 isoform X1 [Vollenhovia emeryi]	2.33176600923922	22.8357197201407	5.7819350662803	3.94949432298479	7.83164682227512e-05	0.00673107178252438
Contig94154	#N/A	0.540956919455863	22.8445091809092	5.91748512073045	3.8605097798859	0.000113150711593999	0.00919899660304795
Contig107375	#N/A	0.575212962740471	22.8459056742645	5.91755879132595	3.86069770996655	0.000113063712013972	0.00919721549593452
Contig65589	ref|XP_011635144.1| PREDICTED: nephrin [Pogonomyrmex barbatus]	0.496318629066874	22.8538847580064	5.92243212108662	3.85886816273267	0.000113913364570452	0.00925035441017885
Contig12571	#N/A	0.563549536290906	22.8865571947008	5.9155908169243	3.86885400004732	0.000109348091215713	0.00894647205819719
Contig33882	#N/A	0.25153086531136	22.9350298777713	5.93892614437509	3.86181429440635	0.000112548104734646	0.00916054697850882
Contig92393	ref|XP_011566071.1| PREDICTED: phosphoenolpyruvate carboxykinase [ATP]-like [Plutella xylostella]	0.25153086531136	22.9350298777713	5.93892614437509	3.86181429440635	0.000112548104734646	0.00916054697850882
[truncated: 388 more rows]
