# Supplementary material for: Immune challenge reduces gut microbial diversity and triggers fertility-dependent gene expression changes in a social insect
Source: BMC Genomics. 2020 Nov 23;21:816. doi: 10.1186/s12864-020-07191-9 (PMC7682046; doi:10.1186/s12864-020-07191-9)
Supplement: Supplementary file 1 — Additional file 1. Additional methodological details, Figures S1 and S2 and Table S2. Description of additional supplementary tables (Tables S1, S3-S18) are also provided. [file 12864_2020_7191_MOESM1_ESM.zip › Table_S9.xlsx]

## Sheet: a)
Contig	Annotation	baseMean	log2FoldChange	lfcSE	stat	pvalue	padj
Contig23018	ref|XP_011642049.1| PREDICTED: PP2C-like domain-containing protein CG9801 isoform X3 [Pogonomyrmex barbatus]	135.381	0.522486	0.159732	3.27101	0.00107164	0.0482537
Contig18122	#N/A	73.5398	0.581572	0.151288	3.84413	0.000120979	0.00787378
Contig21701	ref|XP_011862704.1| PREDICTED: zonadhesin-like [Vollenhovia emeryi]	208.769	1.21479	0.352256	3.4486	0.0005635	0.0281644
Contig66070	ref|XP_011876763.1| PREDICTED: trafficking protein particle complex subunit 10 isoform X1 [Vollenhovia emeryi]	66.4848	1.27422	0.385917	3.3018	0.000960652	0.0439991
Contig66128	ref|XP_011051181.1| PREDICTED: AF4/FMR2 family member 4 [Acromyrmex echinatior]	42.3391	1.39897	0.39067	3.58094	0.000342354	0.0190148
Contig106926	ref|XP_011640149.1| PREDICTED: probable G-protein coupled receptor 125 isoform X1 [Pogonomyrmex barbatus]	36.2701	2.04821	0.44766	4.57538	4.7536e-06	0.00069531
Contig14603	#N/A	4.62292	2.09214	0.604171	3.46283	0.000534533	0.0270322
Contig44875	#N/A	9.91057	2.32326	0.597463	3.88854	0.000100847	0.00670521
Contig80760	ref|XP_011159547.1| PREDICTED: putative inorganic phosphate cotransporter isoform X1 [Solenopsis invicta]	8.26602	2.43248	0.6988	3.48094	0.000499663	0.0255523
Contig125806	ref|XP_011698833.1| PREDICTED: serine/threonine-protein kinase NLK, partial [Wasmannia auropunctata]	20.5714	2.5113	0.664584	3.77876	0.000157611	0.0099154
Contig18796	ref|XP_011689338.1| PREDICTED: uncharacterized protein LOC105450917, partial [Wasmannia auropunctata]	14.9414	2.53204	0.77066	3.28555	0.00101784	0.0461695
Contig119964	#N/A	8.98621	2.6037	0.791917	3.28785	0.00100956	0.0458822
Contig7493	ref|XP_011867840.1| PREDICTED: lysosome-associated membrane glycoprotein 5 [Vollenhovia emeryi]	66.1776	2.65549	0.666139	3.98639	6.70872e-05	0.00474673
Contig23779	ref|XP_011858111.1| PREDICTED: uncharacterized protein LOC105555691 [Vollenhovia emeryi]	71.0084	2.88542	0.837509	3.44524	0.000570544	0.0284561
Contig96590	ref|XP_011059422.1| PREDICTED: transcription initiation factor TFIID subunit 8 [Acromyrmex echinatior]	21.9453	2.99394	0.903272	3.31455	0.000917905	0.042357
Contig77149	ref|XP_011864167.1| PREDICTED: bifunctional coenzyme A synthase [Vollenhovia emeryi]	59.8449	3.01946	0.858277	3.51805	0.000434728	0.0229201
Contig18044	ref|XP_011159908.1| PREDICTED: uncharacterized protein LOC105195956 [Solenopsis invicta]	5.27438	3.06571	0.797397	3.84465	0.000120725	0.00786086
Contig38653	ref|XP_011858323.1| PREDICTED: uncharacterized protein LOC105555868 [Vollenhovia emeryi]	12.6676	3.0926	0.884579	3.49613	0.00047206	0.0244325
Contig127752	ref|XP_011875911.1| PREDICTED: alpha-(1,6)-fucosyltransferase [Vollenhovia emeryi]	128.818	3.22743	0.989457	3.26182	0.00110699	0.0496554
Contig67084	ref|XP_011862961.1| PREDICTED: uncharacterized protein LOC105559353 isoform X1 [Vollenhovia emeryi]	9.90656	3.24145	0.870765	3.72254	0.000197232	0.0120174
Contig8243	ref|XP_011632463.1| PREDICTED: protein bunched, class 2/F/G isoform-like [Pogonomyrmex barbatus]	7.90393	3.27075	0.998676	3.27508	0.00105631	0.0476564
Contig8212	#N/A	5.41241	3.34887	0.936418	3.57625	0.000348553	0.0192833
Contig121073	ref|XP_012534662.1| PREDICTED: protein groucho-1-like [Monomorium pharaonis]	7.80275	3.37656	0.971443	3.47582	0.000509294	0.0259508
Contig26692	ref|XP_011175716.1| PREDICTED: Down syndrome cell adhesion molecule-like protein Dscam2 [Solenopsis invicta]	26.07	3.41395	0.961075	3.55222	0.000382001	0.0207598
Contig108746	ref|XP_011864338.1| PREDICTED: angiotensin-converting enzyme-like isoform X1 [Vollenhovia emeryi]	9.76871	3.41802	1.02387	3.33832	0.00084286	0.0393698
Contig127949	ref|XP_011706148.1| PREDICTED: uncharacterized protein LOC105461348 isoform X1 [Wasmannia auropunctata]	4.45699	3.71093	1.11772	3.32009	0.000899881	0.0416614
Contig18701	ref|YP_009115389.1| NADH dehydrogenase subunit 4 (mitochondrion) [Myrmica scabrinodis]	4.52308	3.75117	1.02312	3.66639	0.000245995	0.0145182
Contig108458	ref|XP_011065169.1| PREDICTED: phospholipid scramblase 2 isoform X1 [Acromyrmex echinatior]	18.7122	3.76056	1.06916	3.51731	0.000435942	0.0229669
Contig148971	ref|XP_011869367.1| PREDICTED: differentially expressed in FDCP 6 homolog isoform X3 [Vollenhovia emeryi]	46.1956	3.8082	1.09045	3.49232	0.000478842	0.0247292
Contig78451	ref|XP_011869403.1| PREDICTED: diuretic hormone receptor-like isoform X5 [Vollenhovia emeryi]	9.71152	3.85861	1.09556	3.52205	0.000428222	0.0226531
Contig103706	ref|XP_012524871.1| PREDICTED: uncharacterized protein DDB_G0283697-like [Monomorium pharaonis]	4.23301	3.90234	1.14223	3.41642	0.000634511	0.0310869
Contig138073	ref|XP_011162397.1| PREDICTED: orcokinin peptides type A-like [Solenopsis invicta]	108.576	3.94001	0.954721	4.12687	3.67733e-05	0.00295897
Contig20230	ref|XP_012531477.1| PREDICTED: acetylcholine receptor subunit alpha-type acr-16-like [Monomorium pharaonis]	25.9217	4.0989	1.2095	3.38893	0.000701652	0.0337445
Contig60054	ref|XP_014485169.1| PREDICTED: ATP-dependent RNA helicase DDX42 [Dinoponera quadriceps]	6.81512	4.11251	1.14428	3.59399	0.000325658	0.0183489
Contig20782	ref|XP_011868215.1| PREDICTED: otopetrin-2-like isoform X3 [Vollenhovia emeryi]	9.7824	4.20418	1.07716	3.90302	9.49991e-05	0.00638283
Contig94628	ref|XP_011875897.1| PREDICTED: uncharacterized protein LOC105566470 isoform X1 [Vollenhovia emeryi]	27.162	4.47115	1.36597	3.27323	0.00106326	0.0479526
Contig122821	ref|XP_011883598.1| PREDICTED: uncharacterized protein LOC105570767 isoform X3 [Vollenhovia emeryi]	9.04764	4.48682	1.1954	3.75341	0.000174443	0.0108154
Contig49432	ref|XP_011634895.1| PREDICTED: striatin-interacting protein 1 [Pogonomyrmex barbatus]	26.3234	4.49479	1.34282	3.34728	0.000816099	0.0384119
Contig135842	ref|XP_011882031.1| PREDICTED: aminopeptidase N [Vollenhovia emeryi]	86.3431	4.5486	1.34432	3.38356	0.000715524	0.0343504
Contig14762	ref|XP_011165057.1| PREDICTED: uncharacterized protein LOC105199598 [Solenopsis invicta]	46.5668	4.65304	1.33913	3.47468	0.000511455	0.0260141
Contig125761	ref|XP_011872120.1| PREDICTED: glutamate decarboxylase isoform X1 [Vollenhovia emeryi]	62.4003	4.68801	1.39004	3.37257	0.000744694	0.0355003
Contig43518	ref|XP_011062017.1| PREDICTED: methyltransferase-like protein 17, mitochondrial [Acromyrmex echinatior]	11.6194	4.69434	1.23669	3.79589	0.000147112	0.00935908
Contig36398	#N/A	7.93894	4.7108	1.33167	3.53752	0.000403899	0.0216608
Contig54692	ref|XP_011859165.1| PREDICTED: uncharacterized protein LOC105556682 [Vollenhovia emeryi]	13.9796	4.77703	1.40899	3.3904	0.000697914	0.0336105
Contig139968	ref|XP_011865042.1| PREDICTED: WD repeat-containing protein 3 [Vollenhovia emeryi]	21.0264	4.77856	1.36232	3.50767	0.000452055	0.0236636
Contig19808	#N/A	3418.98	4.84582	1.10071	4.40245	1.07035e-05	0.00125856
Contig83263	ref|XP_011702976.1| PREDICTED: uncharacterized protein LOC105459013 [Wasmannia auropunctata]	5.12663	5.02726	1.5171	3.31374	0.000920582	0.042439
Contig84474	ref|XP_012540705.1| PREDICTED: V-type proton ATPase subunit d [Monomorium pharaonis]	39.8778	5.17157	1.56152	3.31188	0.000926709	0.0426519
Contig74228	ref|XP_011878980.1| PREDICTED: uncharacterized protein LOC105568160 [Vollenhovia emeryi]	3382.9	5.3637	1.60141	3.34937	0.000809962	0.0381739
Contig91637	ref|XP_015438077.1| PREDICTED: RNA-directed DNA polymerase from mobile element jockey-like [Dufourea novaeangliae]	10.9022	5.39661	1.50859	3.57726	0.000347221	0.0192246
Contig41720	ref|XP_011155820.1| PREDICTED: limbic system-associated membrane protein-like isoform X1 [Solenopsis invicta]	14.1291	5.70725	1.44724	3.94353	8.02904e-05	0.00551789
Contig42377	ref|XP_011702142.1| PREDICTED: excitatory amino acid transporter isoform X2 [Wasmannia auropunctata]	15.9896	5.7405	1.01711	5.64395	1.66192e-08	7.05178e-06
Contig25041	ref|XP_011863891.1| PREDICTED: ornithine decarboxylase 2-like isoform X1 [Vollenhovia emeryi]	7.24068	5.75656	1.71171	3.36305	0.000770864	0.0365383
Contig134275	ref|XP_011631462.1| PREDICTED: uncharacterized protein LOC105423416 isoform X2 [Pogonomyrmex barbatus]	30.4234	6.05345	1.31246	4.61229	3.98263e-06	0.000603145
Contig83289	ref|XP_014476583.1| PREDICTED: focal adhesion kinase 1 isoform X4 [Dinoponera quadriceps]	19.3897	6.17606	1.66547	3.70829	0.000208663	0.0125998
Contig119890	ref|XP_011170369.1| PREDICTED: uncharacterized protein LOC105203292 [Solenopsis invicta]	12.8715	6.22775	1.8066	3.44722	0.000566392	0.028289
Contig123601	ref|XP_011068281.1| PREDICTED: uncharacterized protein CG10915 isoform X1 [Acromyrmex echinatior]	9.68197	6.25846	1.48572	4.2124	2.52673e-05	0.00222976
Contig63669	ref|XP_011164341.1| PREDICTED: lethal(2)neighbour of Tid protein [Solenopsis invicta]	61.59	6.25886	1.43341	4.36642	1.26301e-05	0.00139858
Contig65980	ref|XP_011873888.1| PREDICTED: thyrotropin-releasing hormone receptor-like isoform X2 [Vollenhovia emeryi]	38.7723	6.32086	1.4026	4.50651	6.59011e-06	0.000884295
Contig92058	ref|XP_011693337.1| PREDICTED: conserved oligomeric Golgi complex subunit 7 [Wasmannia auropunctata]	13.0054	6.4821	1.76472	3.67316	0.000239568	0.0142043
Contig97217	ref|XP_011160802.1| PREDICTED: peptidyl-prolyl cis-trans isomerase G-like [Solenopsis invicta]	98.5798	7.37749	1.99717	3.69396	0.000220784	0.0132342
Contig142476	ref|XP_011705207.1| PREDICTED: phosphatidylinositol 4-kinase beta [Wasmannia auropunctata]	51.0087	7.75858	1.57889	4.91396	8.92547e-07	0.000176137
Contig23183	ref|XP_011640277.1| PREDICTED: aminopeptidase N [Pogonomyrmex barbatus]	338.588	8.02131	1.53026	5.24179	1.59e-07	4.21473e-05
Contig46661	ref|XP_011863722.1| PREDICTED: unconventional myosin-XVIIIa-like isoform X3 [Vollenhovia emeryi]	9.1108	8.03636	2.31298	3.47447	0.00051187	0.0260258
Contig38285	ref|XP_011862737.1| PREDICTED: talin-1 isoform X1 [Vollenhovia emeryi]	68.8071	8.24005	2.13162	3.86562	0.000110807	0.00727204
Contig73765	ref|XP_011060105.1| PREDICTED: vascular endothelial growth factor receptor 1 isoform X1 [Acromyrmex echinatior]	51.2041	8.25093	2.18725	3.77229	0.000161758	0.0101446
Contig123644	ref|XP_011861915.1| PREDICTED: serine/threonine-protein kinase fused [Vollenhovia emeryi]	24.8003	8.25182	2.41384	3.41854	0.000629577	0.0309094
Contig112391	ref|XP_012537245.1| PREDICTED: probable tyrosyl-DNA phosphodiesterase [Monomorium pharaonis]	7.49453	8.65188	2.59937	3.32846	0.000873288	0.0405898
Contig147687	ref|XP_011875539.1| PREDICTED: U2 snRNP-associated SURP motif-containing protein isoform X3 [Vollenhovia emeryi]	5.97818	9.45578	2.61719	3.61295	0.000302729	0.0172201
Contig15483	ref|XP_011879368.1| PREDICTED: ADAMTS-like protein 3 isoform X1 [Vollenhovia emeryi]	6.36411	10.364	2.78367	3.72313	0.000196769	0.0119978
Contig119217	ref|XP_011872888.1| PREDICTED: protein NETWORKED 1D-like isoform X4 [Vollenhovia emeryi]	58.0106	10.5076	2.68953	3.90685	9.35053e-05	0.00630044
Contig109774	ref|XP_011877174.1| PREDICTED: GMP synthase [glutamine-hydrolyzing] [Vollenhovia emeryi]	63.1238	10.9935	1.96792	5.58633	2.31922e-08	9.15359e-06
Contig94591	ref|XP_011864417.1| PREDICTED: tyrosine-protein kinase Fps85D isoform X1 [Vollenhovia emeryi]	2.88661	12.3483	3.70546	3.33247	0.000860794	0.040075
Contig74424	#N/A	0.81332	13.0548	3.69535	3.53275	0.000411259	0.021953
Contig45962	#N/A	3.57886	13.0664	2.77046	4.71632	2.40148e-06	0.000404548
Contig27539	ref|XP_392857.2| PREDICTED: lysosomal aspartic protease [Apis mellifera]	0.758631	13.2109	3.11068	4.24694	2.16709e-05	0.00201981
Contig75112	#N/A	1.18717	13.2184	3.66743	3.60428	0.000313021	0.0177413
Contig100257	#N/A	0.878213	13.4012	3.66287	3.65865	0.000253549	0.0148964
Contig61995	#N/A	10.6574	13.5846	2.20145	6.17077	6.79573e-10	5.27592e-07
Contig126343	#N/A	0.46616	13.7017	4.19066	3.26957	0.0010771	0.0484686
Contig50289	#N/A	0.282622	13.7203	4.20596	3.26211	0.00110587	0.0496207
Contig128640	#N/A	0.168757	13.7383	4.20596	3.26639	0.00108927	0.0489384
Contig144775	#N/A	0.168757	13.7383	4.20596	3.26639	0.00108927	0.0489384
Contig45533	ref|XP_011872815.1| PREDICTED: uncharacterized protein LOC105564777 [Vollenhovia emeryi]	0.415293	13.7446	4.2011	3.27165	0.00106921	0.0481794
Contig44169	#N/A	13.1695	13.7488	4.2037	3.27064	0.00107305	0.0483016
Contig53172	#N/A	0.484165	13.7491	4.20596	3.26896	0.00107943	0.0485581
Contig137644	ref|XP_011881229.1| PREDICTED: secretin receptor-like isoform X5 [Vollenhovia emeryi]	1.47973	13.7599	4.20596	3.27154	0.00106965	0.0481794
Contig100302	ref|XP_012524516.1| PREDICTED: L-galactose dehydrogenase-like isoform X1 [Monomorium pharaonis]	0.302937	13.7657	4.20596	3.2729	0.00106451	0.0479936
Contig51466	#N/A	0.256742	13.7798	4.20596	3.27627	0.00105188	0.0474849
Contig91479	#N/A	0.151845	13.7884	4.20059	3.28248	0.00102897	0.0465993
Contig53589	#N/A	0.311115	13.7891	4.20596	3.27847	0.00104373	0.0471471
Contig44434	#N/A	0.182206	13.7935	4.20236	3.28232	0.00102956	0.0466114
Contig82496	#N/A	0.265428	13.7943	4.20596	3.27971	0.00103914	0.0469696
Contig79219	ref|XP_012236055.1| PREDICTED: uncharacterized protein LOC105680164 [Linepithema humile]	0.194012	13.7952	4.20109	3.28372	0.00102445	0.0464099
Contig75507	#N/A	0.609461	13.7986	4.2021	3.28374	0.00102441	0.0464099
Contig147342	ref|XP_012054647.1| PREDICTED: follistatin-related protein 5-like [Atta cephalotes]	0.148389	13.7997	4.20596	3.28099	0.00103442	0.0468165
Contig59775	ref|XP_011694576.1| PREDICTED: uncharacterized protein LOC105453964 isoform X1 [Wasmannia auropunctata]	0.498049	13.8222	4.20596	3.28635	0.00101495	0.0460681
Contig62065	#N/A	0.283557	13.8227	4.20596	3.28645	0.00101458	0.0460657
Contig57608	#N/A	0.617489	13.8359	4.20596	3.2896	0.00100331	0.0456273
Contig64425	ref|XP_011864133.1| PREDICTED: putative acyl-activating enzyme 19 [Vollenhovia emeryi]	0.64469	13.8528	4.20596	3.29361	0.000989095	0.0450245
Contig48029	#N/A	0.296311	13.8564	4.20596	3.29448	0.00098605	0.0449004
Contig92115	#N/A	0.296311	13.8564	4.20596	3.29448	0.00098605	0.0449004
Contig92479	#N/A	0.296311	13.8564	4.20596	3.29448	0.00098605	0.0449004
Contig80412	#N/A	1.08333	13.8578	4.20596	3.29479	0.000984936	0.044893
Contig108134	ref|XP_011688410.1| PREDICTED: transient receptor potential cation channel protein painless-like [Wasmannia auropunctata]	0.185862	13.8606	4.20005	3.3001	0.000966496	0.0442095
Contig34376	#N/A	0.248799	13.8643	4.20405	3.29785	0.000974279	0.044436
Contig43661	#N/A	0.349928	13.8671	4.20308	3.29928	0.000969339	0.0442392
Contig76782	#N/A	0.17283	13.874	4.20596	3.29865	0.000971503	0.0443237
Contig55626	#N/A	0.239694	13.8767	4.20596	3.2993	0.000969273	0.0442392
Contig58912	#N/A	0.239694	13.8767	4.20596	3.2993	0.000969273	0.0442392
Contig62599	ref|XP_013412642.1| PREDICTED: 40S ribosomal protein S18 [Lingula anatina]	0.239694	13.8767	4.20596	3.2993	0.000969273	0.0442392
Contig63262	ref|XP_015773190.1| PREDICTED: dnaJ homolog subfamily B member 13-like [Acropora digitifera]	0.239694	13.8767	4.20596	3.2993	0.000969273	0.0442392
Contig13702	ref|XP_012538239.1| PREDICTED: UPF0160 protein MYG1, mitochondrial isoform X3 [Monomorium pharaonis]	21.6751	13.8778	4.20596	3.29956	0.00096836	0.0442392
Contig51746	#N/A	0.295256	13.8896	4.20596	3.30237	0.000958713	0.0439388
Contig63551	ref|XP_013403626.1| PREDICTED: 40S ribosomal protein S3a-like [Lingula anatina]	0.295256	13.8896	4.20596	3.30237	0.000958713	0.0439388
Contig74975	#N/A	0.295256	13.8896	4.20596	3.30237	0.000958713	0.0439388
Contig95435	ref|XP_002057727.1| uncharacterized protein Dvir_GJ17943 [Drosophila virilis]	0.295256	13.8896	4.20596	3.30237	0.000958713	0.0439388
Contig115706	ref|XP_011172516.1| PREDICTED: retrovirus-related Pol polyprotein from transposon TNT 1-94, partial [Solenopsis invicta]	0.382539	13.8949	4.20596	3.30361	0.000954469	0.0438011
Contig38579	#N/A	0.367715	13.8977	4.2021	3.30732	0.000941948	0.0432687
Contig41551	#N/A	0.553153	13.899	4.20141	3.30816	0.000939107	0.0431662
Contig112941	ref|XP_011858579.1| PREDICTED: fatty acid synthase-like [Vollenhovia emeryi]	0.205847	13.9064	4.1996	3.31137	0.0009284	0.0427158
Contig44856	#N/A	0.298045	13.9127	4.20419	3.30925	0.000935457	0.0430124
Contig146250	#N/A	0.154851	13.9216	4.20306	3.31226	0.000925456	0.0426498
Contig92299	ref|XP_011882433.1| PREDICTED: uncharacterized protein LOC105570082, partial [Vollenhovia emeryi]	0.398341	13.934	4.2027	3.31548	0.000914864	0.0422443
Contig109041	ref|XP_011690462.1| PREDICTED: uncharacterized protein LOC105451601 [Wasmannia auropunctata]	1.28238	13.938	4.20271	3.31644	0.000911737	0.0421274
Contig65722	ref|XP_009162918.1| hypothetical protein T265_00782 [Opisthorchis viverrini]	0.286482	13.9394	4.20596	3.31421	0.000919009	0.0423803
Contig93683	#N/A	0.228596	13.9404	4.20596	3.31445	0.00091825	0.0423591
Contig90495	ref|XP_015752019.1| PREDICTED: adiponectin receptor protein 1-like [Acropora digitifera]	0.351346	13.9468	4.20596	3.31597	0.000913269	0.0421844
Contig82033	#N/A	0.384764	13.948	4.20418	3.31764	0.000907808	0.0420008
Contig114137	ref|XP_011876991.1| PREDICTED: uncharacterized protein LOC105567061 isoform X1 [Vollenhovia emeryi]	9.74427	13.948	4.15197	3.35938	0.000781181	0.0369777
Contig65648	#N/A	0.244308	13.9525	4.20596	3.31732	0.000908865	0.0420222
Contig93299	#N/A	0.244308	13.9525	4.20596	3.31732	0.000908865	0.0420222
Contig148298	ref|XP_012064320.1| PREDICTED: peripheral plasma membrane protein CASK-like [Atta cephalotes]	0.367114	13.9642	4.20021	3.32464	0.000885316	0.0410543
Contig38298	ref|XP_011156622.1| PREDICTED: uncharacterized protein LOC105193745 [Solenopsis invicta]	0.485589	13.9786	4.20596	3.32353	0.000888845	0.0411909
Contig4330	#N/A	0.259576	13.9945	4.20404	3.32882	0.000872146	0.0405501
Contig55704	#N/A	0.28765	13.9981	4.20596	3.32817	0.000874181	0.0406121
Contig413	#N/A	0.478374	14.0115	4.20596	3.33134	0.000864283	0.0402109
Contig142545	#N/A	0.349362	14.0124	4.20596	3.33155	0.000863626	0.0401936
Contig85391	#N/A	0.290354	14.0148	4.2016	3.33559	0.000851178	0.0397189
Contig110626	#N/A	0.170611	14.0166	4.20279	3.33506	0.000852812	0.039782
Contig88394	#N/A	0.343773	14.0172	4.20596	3.33271	0.000860039	0.040053
Contig124903	ref|XP_011870203.1| PREDICTED: uncharacterized protein LOC105563313 [Vollenhovia emeryi]	0.371849	14.0188	4.20596	3.33307	0.000858922	0.0400142
Contig114896	ref|XP_011877022.1| PREDICTED: sodium/potassium/calcium exchanger 4-like [Vollenhovia emeryi]	11.4032	14.0192	4.20042	3.33757	0.00084514	0.0394502
Contig35427	#N/A	0.269038	14.0222	4.20596	3.33388	0.000856432	0.0399245
Contig145127	ref|XP_011643446.1| PREDICTED: LOW QUALITY PROTEIN: putative DNA helicase Ino80 [Pogonomyrmex barbatus]	0.482746	14.0377	4.19486	3.34641	0.000818663	0.0384941
Contig126014	#N/A	0.363561	14.0394	4.20596	3.33797	0.000843925	0.0394065
Contig135543	#N/A	0.413556	14.0428	4.20596	3.33879	0.000841436	0.0393163
Contig45740	#N/A	0.273823	14.0462	4.20596	3.3396	0.000839	0.0392536
Contig4621	ref|XP_014669690.1| PREDICTED: transcription factor BTF3 homolog 4-like isoform X2 [Priapulus caudatus]	0.273823	14.0462	4.20596	3.3396	0.000839	0.0392536
Contig70391	ref|XP_009026500.1| hypothetical protein HELRODRAFT_193555 [Helobdella robusta]	0.273823	14.0462	4.20596	3.3396	0.000839	0.0392536
Contig86644	#N/A	0.273823	14.0462	4.20596	3.3396	0.000839	0.0392536
Contig96705	#N/A	0.273823	14.0462	4.20596	3.3396	0.000839	0.0392536
Contig104396	#N/A	0.345103	14.0482	4.20426	3.34142	0.000833518	0.0390885
Contig93886	ref|XP_014095333.1| PREDICTED: cytochrome c oxidase subunit 5B, mitochondrial [Bactrocera oleae]	0.338912	14.0542	4.20596	3.3415	0.000833266	0.0390885
Contig74318	ref|XP_011172391.1| PREDICTED: tektin-2 [Solenopsis invicta]	0.508857	14.0638	4.1998	3.34868	0.000811979	0.0382561
Contig97560	ref|XP_011860183.1| PREDICTED: phosphoglycerate kinase, cytosolic-like [Vollenhovia emeryi]	0.310867	14.0669	4.20596	3.34451	0.000824268	0.0386804
Contig101839	#N/A	0.642082	14.0702	4.20596	3.3453	0.000821928	0.0386219
Contig121941	#N/A	1.22792	14.0729	4.20148	3.34951	0.00080955	0.0381672
Contig66728	ref|XP_012249081.1| PREDICTED: probable lactoylglutathione lyase, chloroplast [Bombus impatiens]	0.386795	14.075	4.20596	3.34645	0.000818549	0.0384941
Contig129172	ref|XP_011691488.1| PREDICTED: regulating synaptic membrane exocytosis protein 2 [Wasmannia auropunctata]	0.430112	14.0795	4.20025	3.35206	0.000802121	0.0378422
Contig33324	ref|XP_011701846.1| PREDICTED: larval cuticle protein A2B-like [Wasmannia auropunctata]	0.440267	14.0824	4.19374	3.35795	0.000785232	0.0371308
Contig87848	ref|XP_014474199.1| PREDICTED: glyoxylate reductase/hydroxypyruvate reductase-like isoform X3 [Dinoponera quadriceps]	0.739371	14.0965	4.20419	3.35296	0.000799523	0.0377322
Contig87592	#N/A	0.384109	14.0983	4.20063	3.35623	0.000790119	0.0373383
Contig146569	ref|XP_011165186.1| PREDICTED: insulin gene enhancer protein ISL-1 [Solenopsis invicta]	0.44654	14.1031	4.20596	3.35312	0.00079907	0.0377234
Contig33755	#N/A	0.649273	14.1094	3.71344	3.79955	0.000144959	0.0092471
Contig129308	#N/A	0.165411	14.1229	4.19637	3.3655	0.000764058	0.0362766
Contig138706	#N/A	0.165411	14.1229	4.19637	3.3655	0.000764058	0.0362766
Contig139166	#N/A	0.165411	14.1229	4.19637	3.3655	0.000764058	0.0362766
Contig141986	#N/A	0.165411	14.1229	4.19637	3.3655	0.000764058	0.0362766
Contig134744	#N/A	0.515796	14.1269	4.19916	3.36423	0.00076758	0.0364193
Contig46842	ref|XP_014208072.1| PREDICTED: beta-hexosaminidase subunit beta-like [Copidosoma floridanum]	0.326744	14.1271	4.20596	3.35883	0.000782733	0.0370264
Contig52712	#N/A	0.326744	14.1271	4.20596	3.35883	0.000782733	0.0370264
Contig52753	#N/A	0.272002	14.1332	4.20596	3.36029	0.000778619	0.0368812
Contig89058	#N/A	0.268024	14.1422	4.20596	3.36242	0.000772617	0.0366091
Contig39104	ref|XP_002056815.1| uncharacterized protein Dvir_GJ16679 [Drosophila virilis]	0.389711	14.1569	4.20596	3.36593	0.000762869	0.0362689
Contig133270	ref|XP_012531226.1| PREDICTED: transcription elongation factor S-II-like isoform X1 [Monomorium pharaonis]	0.292642	14.1582	4.2053	3.36675	0.000760584	0.0361724
Contig137853	#N/A	0.335725	14.1598	4.20167	3.37003	0.000751592	0.0357568
Contig104472	#N/A	0.324762	14.1631	4.20266	3.37004	0.000751569	0.0357568
Contig84860	ref|XP_005089168.1| PREDICTED: transmembrane 9 superfamily member 4-like isoform X1 [Aplysia californica]	0.341026	14.1743	4.20596	3.37005	0.000751532	0.0357568
Contig54180	#N/A	0.274031	14.1789	4.19916	3.3766	0.000733871	0.0350672
Contig141701	#N/A	0.105734	14.1829	4.198	3.37849	0.000728852	0.0348864
Contig57021	ref|XP_011705630.1| PREDICTED: uncharacterized protein LOC105460837 [Wasmannia auropunctata]	0.105734	14.1829	4.198	3.37849	0.000728852	0.0348864
Contig100949	#N/A	0.208699	14.1841	4.20027	3.37695	0.000732936	0.0350344
Contig32328	ref|XP_016941643.1| PREDICTED: 14-3-3 protein epsilon [Drosophila suzukii]	0.354789	14.1857	4.20596	3.37276	0.00074418	0.0354878
Contig123819	ref|XP_012227974.1| PREDICTED: LOW QUALITY PROTEIN: A-kinase anchor protein 9-like [Linepithema humile]	0.239182	14.1861	4.20596	3.37286	0.00074392	0.0354874
Contig61352	#N/A	0.170276	14.1911	4.20063	3.37833	0.000729269	0.0348945
Contig72309	#N/A	0.338209	14.199	4.20596	3.37594	0.000735651	0.0351205
Contig125835	ref|XP_014205494.1| PREDICTED: regulator of nonsense transcripts 1 homolog isoform X3 [Copidosoma floridanum]	0.31575	14.2015	4.20305	3.37884	0.000727916	0.034877
Contig147278	ref|XP_011873663.1| PREDICTED: uncharacterized protein LOC105565244 isoform X1 [Vollenhovia emeryi]	0.325525	14.2058	4.20256	3.38026	0.000724162	0.0347089
Contig79079	#N/A	0.198973	14.2061	4.20596	3.37762	0.000731158	0.0349612
Contig129401	#N/A	0.347617	14.2123	4.20171	3.38251	0.00071826	0.0344377
Contig131599	ref|XP_011647743.1| PREDICTED: peroxisomal hydratase-dehydrogenase-epimerase-like [Pogonomyrmex barbatus]	0.422746	14.2155	4.20183	3.38316	0.000716566	0.0343798
Contig123024	ref|XP_011159523.1| PREDICTED: haloacid dehalogenase-like hydrolase domain-containing protein 2 [Solenopsis invicta]	0.812383	14.2242	3.79098	3.75213	0.000175342	0.0108616
Contig131144	#N/A	0.203775	14.2243	4.20403	3.38349	0.00071571	0.0343504
Contig70569	ref|XP_006811583.1| PREDICTED: prosaposin-like [Saccoglossus kowalevskii]	0.432564	14.2328	4.20596	3.38397	0.000714459	0.0343137
Contig92373	#N/A	0.262726	14.2368	4.19696	3.39217	0.000693424	0.0334398
Contig109769	#N/A	0.646654	14.2521	3.7916	3.75887	0.000170679	0.010624
Contig47122	#N/A	0.270145	14.2658	4.20596	3.3918	0.00069434	0.0334497
Contig66838	#N/A	0.482083	14.2689	4.20418	3.39398	0.000688854	0.0332763
Contig135880	#N/A	0.799129	14.2815	4.20596	3.39554	0.000684928	0.0331092
Contig79361	#N/A	0.352512	14.2835	4.20407	3.39755	0.000679933	0.0329123
Contig114410	#N/A	0.367976	14.2863	4.20413	3.39817	0.000678394	0.0328608
Contig126032	#N/A	0.225333	14.2897	4.20487	3.39838	0.000677869	0.0328467
Contig130006	#N/A	0.629795	14.2908	4.20105	3.40171	0.000669645	0.0325039
Contig74118	ref|XP_011696914.1| PREDICTED: ubiquinone biosynthesis monooxygenase COQ6 isoform X1 [Wasmannia auropunctata]	0.562849	14.2934	4.20238	3.40125	0.000670779	0.0325331
Contig127567	#N/A	0.286238	14.2948	4.19925	3.40413	0.000663762	0.0322516
Contig133862	#N/A	0.165549	14.3044	4.19685	3.40838	0.000653508	0.031819
Contig147375	#N/A	0.165549	14.3044	4.19685	3.40838	0.000653508	0.031819
Contig131163	ref|XP_008190173.1| PREDICTED: uncharacterized protein LOC103311997 [Acyrthosiphon pisum]	0.30053	14.311	4.20103	3.40653	0.000657933	0.0320124
Contig75979	#N/A	0.36907	14.3131	4.20596	3.40306	0.000666349	0.032355
Contig34005	#N/A	0.366957	14.3202	4.20596	3.40474	0.000662277	0.0321905
Contig80142	#N/A	0.283845	14.3215	4.20596	3.40506	0.000661489	0.0321633
Contig140098	ref|XP_011863749.1| PREDICTED: THUMP domain-containing protein 3-like [Vollenhovia emeryi]	0.431312	14.3231	4.20596	3.40543	0.0006606	0.0321311
Contig75668	ref|XP_011876822.1| PREDICTED: uncharacterized protein LOC105566965, partial [Vollenhovia emeryi]	4.78814	14.3259	4.17045	3.43509	0.000592353	0.0293162
Contig39458	#N/A	0.64738	14.3287	4.20042	3.41125	0.000646668	0.0315501
Contig100995	ref|XP_011873844.1| PREDICTED: putative nuclease HARBI1 isoform X2 [Vollenhovia emeryi]	0.195378	14.3318	4.19455	3.41676	0.000633719	0.0310588
Contig55029	#N/A	0.318255	14.3322	4.19972	3.41267	0.000643305	0.0314197
Contig145991	#N/A	0.254456	14.3435	4.19715	3.41744	0.000632126	0.0309915
Contig129325	#N/A	0.26685	14.3436	4.20206	3.41347	0.000641423	0.0313492
Contig34361	ref|XP_001964778.1| uncharacterized protein Dana_GF22866 [Drosophila ananassae]	0.79524	14.3536	4.20418	3.41412	0.000639883	0.0312885
Contig80165	#N/A	0.297301	14.3574	4.20511	3.41428	0.000639506	0.0312885
Contig87885	ref|XP_011877260.1| PREDICTED: LOW QUALITY PROTEIN: uncharacterized aarF domain-containing protein kinase 5 [Vollenhovia emeryi]	0.388423	14.36	4.20596	3.4142	0.000639705	0.0312885
Contig117021	#N/A	0.391561	14.3619	4.20203	3.41785	0.000631188	0.0309563
Contig13157	ref|XP_014469292.1| PREDICTED: 3-phosphoinositide-dependent protein kinase 1 isoform X2 [Dinoponera quadriceps]	1.31422	14.3674	4.16304	3.45118	0.000558139	0.0279459
Contig109135	ref|XP_014479306.1| PREDICTED: ras-related protein Rab-18-B-like isoform X1 [Dinoponera quadriceps]	0.995053	14.3787	4.20238	3.42156	0.000622636	0.0306219
Contig42009	#N/A	0.286447	14.3853	4.20195	3.42349	0.000618215	0.0304256
Contig46401	ref|XP_011176102.1| PREDICTED: E3 ubiquitin-protein ligase MYCBP2-like [Solenopsis invicta]	0.368302	14.3915	4.20272	3.42434	0.000616303	0.0303526
Contig10047	ref|XP_011160339.1| PREDICTED: coiled-coil domain-containing protein 65-like [Solenopsis invicta]	0.185395	14.3954	4.20301	3.42502	0.000614748	0.0302866
Contig105738	#N/A	0.334758	14.4302	4.18862	3.4451	0.000570847	0.0284612
Contig29164	ref|XP_012528120.1| PREDICTED: rabphilin-3A-like, partial [Monomorium pharaonis]	0.19691	14.4303	4.19998	3.4358	0.000590808	0.02925
Contig141165	ref|XP_011693188.1| PREDICTED: E3 ubiquitin-protein ligase NEDD4 isoform X3 [Wasmannia auropunctata]	0.298747	14.4441	4.19386	3.44411	0.000572949	0.0285257
Contig38559	#N/A	0.285463	14.4563	4.20596	3.43711	0.000587955	0.0291189
Contig45267	ref|XP_012524409.1| PREDICTED: arginine decarboxylase-like, partial [Monomorium pharaonis]	0.285463	14.4563	4.20596	3.43711	0.000587955	0.0291189
Contig75988	#N/A	0.285463	14.4563	4.20596	3.43711	0.000587955	0.0291189
Contig79261	#N/A	0.285463	14.4563	4.20596	3.43711	0.000587955	0.0291189
Contig12237	ref|XP_011858447.1| PREDICTED: uncharacterized protein LOC105556001, partial [Vollenhovia emeryi]	0.26605	14.4595	4.20596	3.43785	0.000586349	0.0290984
Contig137153	ref|XP_011642307.1| PREDICTED: tyrosine-protein kinase Btk29A [Pogonomyrmex barbatus]	0.259483	14.4629	4.20596	3.43867	0.000584573	0.0290226
Contig26082	#N/A	0.499948	14.4698	4.20105	3.44432	0.000572493	0.028513
Contig90187	#N/A	0.338729	14.4722	4.20596	3.44088	0.000579832	0.0288176
Contig52440	#N/A	0.889763	14.4738	4.20277	3.44387	0.000573445	0.0285403
Contig122673	ref|XP_011861509.1| PREDICTED: putative helicase mov-10-B.1 isoform X2 [Vollenhovia emeryi]	0.442467	14.4748	4.19135	3.45348	0.000553397	0.027738
Contig16166	ref|XP_012528251.1| PREDICTED: broad-complex core protein isoforms 1/2/3/4/5-like isoform X3 [Monomorium pharaonis]	0.325407	14.4856	4.20202	3.4473	0.000566225	0.028289
Contig68957	ref|XP_011696169.1| PREDICTED: leukotriene A-4 hydrolase [Wasmannia auropunctata]	0.398686	14.4875	4.20596	3.44451	0.00057209	0.0285031
Contig63816	ref|XP_011880098.1| PREDICTED: CD151 antigen [Vollenhovia emeryi]	0.318369	14.4933	4.19182	3.45752	0.000545182	0.0274399
Contig46500	#N/A	0.468608	14.4973	4.19905	3.45252	0.000555382	0.0278177
Contig120070	#N/A	0.270967	14.503	4.20406	3.44977	0.000561066	0.0280558
Contig124629	#N/A	0.397671	14.5048	4.20034	3.45323	0.000553906	0.0277537
Contig135200	ref|XP_011866466.1| PREDICTED: solute carrier family 15 member 1 isoform X2 [Vollenhovia emeryi]	1.00798	14.5081	4.20398	3.45105	0.000558414	0.0279498
Contig128059	ref|XP_011695890.1| PREDICTED: follistatin-related protein 5-like [Wasmannia auropunctata]	0.268884	14.5116	4.20186	3.45362	0.000553113	0.0277336
Contig76949	#N/A	0.573148	14.5144	4.20205	3.45413	0.000552065	0.0277007
Contig144408	#N/A	0.72149	14.5229	4.19944	3.4583	0.000543599	0.0274024
Contig29193	#N/A	0.365985	14.526	4.20426	3.45506	0.000550164	0.0276348
Contig101069	ref|XP_012536011.1| PREDICTED: uncharacterized protein LOC105836495 isoform X2 [Monomorium pharaonis]	0.721134	14.5282	4.18389	3.47242	0.00051578	0.0261775
Contig86053	#N/A	0.275164	14.5338	4.20102	3.45958	0.000541011	0.0272914
Contig62363	#N/A	0.319592	14.5422	4.20596	3.45752	0.000545168	0.0274399
Contig45929	#N/A	0.285261	14.5483	4.20596	3.45897	0.000542249	0.0273441
Contig135359	#N/A	0.309796	14.5498	4.1892	3.47317	0.000514344	0.0261234
Contig43103	#N/A	0.179966	14.5525	4.20394	3.46164	0.000536889	0.0270989
Contig70310	#N/A	0.377402	14.5605	4.20282	3.46446	0.000531289	0.0268873
Contig25148	ref|XP_011863343.1| PREDICTED: uncharacterized protein LOC105559564 isoform X2 [Vollenhovia emeryi]	1.31889	14.5609	4.18096	3.48267	0.000496448	0.0254063
Contig44713	#N/A	0.21407	14.5634	4.20333	3.46472	0.000530791	0.0268718
Contig83992	ref|XP_012532612.1| PREDICTED: uncharacterized protein LOC105834577 [Monomorium pharaonis]	0.464807	14.5634	4.20475	3.46356	0.000533085	0.0269686
Contig147912	ref|XP_012216460.1| PREDICTED: uncharacterized protein LOC105668589 [Linepithema humile]	0.527205	14.5658	4.19805	3.46966	0.000521124	0.0264392
Contig70188	ref|XP_011693598.1| PREDICTED: ankyrin repeat and death domain-containing protein 1A-like isoform X4 [Wasmannia auropunctata]	0.696245	14.5711	4.18326	3.4832	0.000495461	0.0253741
Contig43574	ref|XP_012539889.1| PREDICTED: serine/threonine-protein kinase 16-like [Monomorium pharaonis]	0.946875	14.5854	4.20518	3.46844	0.000523489	0.0265497
Contig100083	#N/A	0.242707	14.5875	4.19364	3.47849	0.000504252	0.0257217
Contig32324	#N/A	0.398924	14.601	4.20464	3.47259	0.000515464	0.0261709
Contig142515	ref|XP_014480360.1| PREDICTED: tyrosine-protein kinase Btk29A isoform X3 [Dinoponera quadriceps]	0.461604	14.6011	4.19999	3.47647	0.00050807	0.0258978
Contig145422	#N/A	0.213886	14.6027	4.20203	3.47514	0.000510579	0.0259789
Contig33048	#N/A	0.199055	14.6047	4.20405	3.47396	0.000512835	0.0260561
Contig81404	#N/A	0.354356	14.6074	4.20314	3.47536	0.000510168	0.025971
Contig74795	ref|XP_011159417.1| PREDICTED: nuclear pore complex protein Nup85 [Solenopsis invicta]	1.03499	14.6112	4.1973	3.48109	0.000499382	0.0255471
Contig114897	ref|XP_011701089.1| PREDICTED: sodium/potassium/calcium exchanger 3-like [Wasmannia auropunctata]	1.3979	14.6118	4.20596	3.47408	0.000512615	0.0260543
Contig60878	#N/A	0.271316	14.6171	4.19553	3.48398	0.000494022	0.025328
Contig43008	ref|XP_009020682.1| hypothetical protein HELRODRAFT_112831 [Helobdella robusta]	0.41484	14.618	4.20596	3.47555	0.000509801	0.0259673
Contig39413	#N/A	0.267398	14.6243	4.19226	3.4884	0.000485925	0.0249885
Contig45119	#N/A	0.442885	14.6263	4.20596	3.47753	0.000506057	0.0258045
Contig49275	#N/A	1.20787	14.63	4.20419	3.47986	0.000501677	0.0256182
Contig91879	ref|XP_011867199.1| PREDICTED: uncharacterized protein LOC105561647 [Vollenhovia emeryi]	0.185578	14.6324	4.19582	3.48739	0.000487762	0.0250707
Contig74099	#N/A	0.176485	14.6373	4.20596	3.48014	0.000501148	0.0256004
Contig100440	#N/A	0.22403	14.6376	4.19484	3.48944	0.000484038	0.0249155
Contig143936	ref|XP_011698896.1| PREDICTED: uncharacterized protein LOC105456502 isoform X4 [Wasmannia auropunctata]	0.303736	14.647	4.20548	3.48284	0.000496133	0.0253993
Contig133968	#N/A	0.285281	14.6475	4.19261	3.49365	0.000476465	0.0246244
Contig40692	ref|XP_011158885.1| PREDICTED: solute carrier family 35 member F2-like isoform X2 [Solenopsis invicta]	0.227975	14.6561	4.19745	3.49167	0.000480002	0.024771
Contig73375	#N/A	0.227975	14.6561	4.19745	3.49167	0.000480002	0.024771
Contig53259	ref|XP_011861050.1| PREDICTED: liprin-beta-2 isoform X3 [Vollenhovia emeryi]	1.09986	14.6571	4.20596	3.48485	0.000492415	0.0252547
Contig65932	ref|XP_001120297.2| PREDICTED: calcium-transporting ATPase type 2C member 1 isoform X1 [Apis mellifera]	0.253652	14.6578	4.20561	3.4853	0.000491585	0.0252305
Contig63871	#N/A	0.651665	14.6623	4.20109	3.49013	0.000482793	0.0248695
Contig95832	#N/A	0.560079	14.6663	4.20596	3.48703	0.000488411	0.0250949
Contig106434	#N/A	0.268133	14.6686	4.19285	3.49848	0.000467924	0.0242807
Contig122370	ref|XP_011879066.1| PREDICTED: aminopeptidase N-like isoform X1 [Vollenhovia emeryi]	0.187551	14.6694	4.19538	3.49656	0.000471296	0.0244198
Contig131624	#N/A	0.187551	14.6694	4.19538	3.49656	0.000471296	0.0244198
Contig83027	ref|XP_011637194.1| PREDICTED: intraflagellar transport protein 88 homolog [Pogonomyrmex barbatus]	1.93241	14.6695	4.20261	3.49056	0.000482005	0.024838
Contig88386	#N/A	0.421946	14.6719	4.20596	3.48836	0.000485987	0.0249885
Contig46516	ref|XP_011555271.1| PREDICTED: protein krasavietz [Plutella xylostella]	0.552148	14.6726	4.20596	3.48853	0.000485693	0.0249885
Contig105974	ref|XP_011873809.1| PREDICTED: spondin-1 isoform X5 [Vollenhovia emeryi]	0.711898	14.6763	4.19892	3.49526	0.000473602	0.0244943
Contig23734	ref|XP_011171881.1| PREDICTED: uncharacterized protein LOC105204491, partial [Solenopsis invicta]	1.09197	14.6775	4.20596	3.4897	0.000483563	0.0249001
Contig93435	#N/A	0.442123	14.6821	4.20596	3.49079	0.000481594	0.0248349
Contig57585	#N/A	0.378169	14.6842	4.20007	3.49618	0.000471967	0.0244325
Contig91022	#N/A	0.322502	14.6874	4.20344	3.49415	0.000475569	0.0245871
Contig147420	ref|XP_012229072.1| PREDICTED: LOW QUALITY PROTEIN: zinc transporter 1 [Linepithema humile]	0.350359	14.6931	4.18796	3.50842	0.000450777	0.0236178
Contig73473	ref|XP_011878820.1| PREDICTED: epsilon-sarcoglycan isoform X2 [Vollenhovia emeryi]	0.503905	14.6947	4.20346	3.49586	0.000472533	0.024448
Contig87621	ref|XP_011633763.1| PREDICTED: uncharacterized protein LOC105424951 [Pogonomyrmex barbatus]	0.593164	14.6972	4.19983	3.49946	0.000466197	0.0242327
Contig98639	ref|XP_011163744.1| PREDICTED: DDB1- and CUL4-associated factor 5 [Solenopsis invicta]	0.292193	14.7068	4.20596	3.49666	0.000471122	0.0244198
Contig134034	ref|XP_011875913.1| PREDICTED: retinoblastoma-like protein 1 isoform X2 [Vollenhovia emeryi]	0.457488	14.7128	4.20404	3.49969	0.0004658	0.0242238
Contig65211	#N/A	0.257901	14.7131	4.20304	3.50059	0.000464222	0.0241952
Contig108144	ref|XP_011863157.1| PREDICTED: uncharacterized protein LOC105559467 isoform X1 [Vollenhovia emeryi]	0.180341	14.7189	4.19814	3.50606	0.000454799	0.0237742
Contig36260	#N/A	0.331233	14.7259	4.20596	3.50121	0.000463155	0.0241485
Contig46511	ref|XP_003729176.1| PREDICTED: AP-1 complex subunit sigma-2 isoform X3 [Strongylocentrotus purpuratus]	0.331233	14.7259	4.20596	3.50121	0.000463155	0.0241485
Contig81403	#N/A	0.331233	14.7259	4.20596	3.50121	0.000463155	0.0241485
Contig102103	ref|XP_012219339.1| PREDICTED: sodium-independent sulfate anion transporter [Linepithema humile]	0.441782	14.7275	4.20555	3.50193	0.000461905	0.0241189
Contig75321	ref|XP_011882740.1| PREDICTED: another transcription unit protein-like [Vollenhovia emeryi]	1.1132	14.7285	3.74124	3.9368	8.25748e-05	0.00564742
Contig89596	ref|XP_011877510.1| PREDICTED: SID1 transmembrane family member 1-like [Vollenhovia emeryi]	0.607542	14.732	4.19525	3.51159	0.000445435	0.023406
Contig146798	#N/A	0.606349	14.7322	4.18231	3.5225	0.000427499	0.0226318
Contig130242	#N/A	0.338255	14.7382	4.20162	3.50775	0.000451913	0.0236636
Contig109638	#N/A	0.315323	14.7389	4.19295	3.51516	0.000439493	0.0231195
Contig147234	#N/A	0.396802	14.7456	4.20135	3.50973	0.000448564	0.023535
Contig70408	#N/A	0.658594	14.7477	4.20596	3.50638	0.000454238	0.0237569
Contig143302	#N/A	0.154924	14.7487	4.19724	3.51391	0.000441565	0.0232113
Contig39724	ref|XP_012535516.1| PREDICTED: protein timeless homolog [Monomorium pharaonis]	0.277825	14.7501	4.18821	3.5218	0.000428622	0.0226658
Contig143423	ref|XP_011692311.1| PREDICTED: uncharacterized protein LOC105452679 isoform X2 [Wasmannia auropunctata]	0.408744	14.7528	4.18502	3.52516	0.000423235	0.0224481
Contig101297	ref|XP_011876124.1| PREDICTED: lachesin-like isoform X3 [Vollenhovia emeryi]	1.04182	14.7529	4.18053	3.52896	0.000417195	0.0221944
Contig81533	#N/A	0.242983	14.7539	4.20337	3.51001	0.000448088	0.0235279
Contig47221	#N/A	0.290956	14.7543	4.20405	3.50954	0.00044889	0.023535
Contig102876	#N/A	0.590263	14.7562	4.20596	3.5084	0.000450804	0.0236178
Contig124534	#N/A	0.259326	14.7578	4.19301	3.51962	0.000432171	0.0228278
Contig38203	#N/A	0.307951	14.7631	4.20596	3.51005	0.000448021	0.0235279
Contig143223	#N/A	0.191349	14.7774	4.19643	3.52143	0.000429233	0.0226834
Contig61915	#N/A	0.285489	14.7832	4.20173	3.51836	0.000434226	0.0229047
Contig131463	#N/A	0.395415	14.7835	4.18997	3.5283	0.000418237	0.0222247
Contig129535	#N/A	0.262321	14.7838	4.19521	3.52397	0.000425125	0.022523
Contig116005	ref|XP_011694911.1| PREDICTED: NACHT and WD repeat domain-containing protein 1-like [Wasmannia auropunctata]	0.236	14.7847	4.18911	3.52932	0.000416623	0.0221724
Contig107143	#N/A	0.414321	14.7939	4.18616	3.534	0.000409321	0.0218744
Contig108086	#N/A	0.29907	14.7979	4.20596	3.51833	0.000434274	0.0229047
Contig119154	#N/A	0.551733	14.7997	4.20596	3.51876	0.000433576	0.0228849
Contig105707	ref|XP_017101086.1| PREDICTED: protein unc-13 homolog A-like, partial [Drosophila bipectinata]	0.298818	14.803	4.19414	3.52944	0.000416435	0.0221707
Contig128943	#N/A	0.41308	14.8079	4.2016	3.52434	0.000424546	0.0225075
Contig24438	ref|XP_012061678.1| PREDICTED: high affinity cationic amino acid transporter 1 [Atta cephalotes]	0.962664	14.8082	4.17848	3.54392	0.000394232	0.0212807
Contig37617	ref|XP_014207744.1| PREDICTED: signal recognition particle receptor subunit alpha homolog isoform X2 [Copidosoma floridanum]	0.376209	14.8109	4.20596	3.5214	0.000429276	0.0226834
Contig122556	#N/A	0.399572	14.8179	4.18425	3.54136	0.000398075	0.0214274
Contig41548	#N/A	0.526145	14.8192	4.20596	3.52338	0.000426081	0.0225652
Contig144333	#N/A	0.30424	14.8207	4.18876	3.5382	0.000402868	0.0216359
Contig74060	#N/A	0.411424	14.8274	4.20596	3.52533	0.00042296	0.022442
Contig129085	ref|XP_011170847.1| PREDICTED: probable cleavage and polyadenylation specificity factor subunit 2 [Solenopsis invicta]	0.331395	14.8322	4.20123	3.53043	0.000414878	0.0221295
Contig56609	#N/A	0.42516	14.8342	4.20596	3.52695	0.000420381	0.0223135
Contig61425	ref|XP_015116717.1| PREDICTED: UDP-glucose 4-epimerase isoform X4 [Diachasma alloeum]	0.42516	14.8342	4.20596	3.52695	0.000420381	0.0223135
Contig44853	#N/A	0.488654	14.8343	4.20596	3.52697	0.000420343	0.0223135
Contig136106	ref|XP_011877563.1| PREDICTED: UPF0160 protein MYG1, mitochondrial isoform X2 [Vollenhovia emeryi]	0.2658	14.8343	4.19329	3.53764	0.000403726	0.0216608
Contig51849	#N/A	0.31927	14.836	4.19545	3.53622	0.0004059	0.0217162
Contig122518	#N/A	0.231515	14.8387	4.1955	3.53682	0.000404975	0.0216831
Contig101687	#N/A	0.290778	14.8389	4.18648	3.54448	0.000393393	0.0212563
Contig44024	ref|XP_013403613.1| PREDICTED: putative ascorbate peroxidase [Lingula anatina]	0.365361	14.8469	4.20596	3.52997	0.000415615	0.0221437
Contig63495	#N/A	0.365361	14.8469	4.20596	3.52997	0.000415615	0.0221437
Contig90369	ref|XP_013418534.1| PREDICTED: ankyrin repeat and MYND domain-containing protein 1-like [Lingula anatina]	0.365361	14.8469	4.20596	3.52997	0.000415615	0.0221437
Contig96189	#N/A	0.378987	14.852	4.19965	3.53648	0.000405498	0.0217029
Contig108615	#N/A	0.426597	14.8535	4.20336	3.53372	0.00040976	0.0218896
Contig95930	ref|XP_012058272.1| PREDICTED: kelch repeat and BTB domain-containing protein 12-like [Atta cephalotes]	0.504742	14.8619	4.20596	3.53354	0.000410037	0.0218961
Contig138366	#N/A	0.325012	14.8639	4.18625	3.55065	0.000384275	0.0208353
Contig86026	ref|XP_014239868.1| PREDICTED: non-lysosomal glucosylceramidase isoform X3 [Cimex lectularius]	0.470929	14.8785	4.20596	3.53749	0.000403946	0.0216608
Contig87380	#N/A	1.99927	14.8805	4.19942	3.54347	0.000394899	0.0212807
Contig114180	ref|XP_012061652.1| PREDICTED: uncharacterized protein LOC105624920 [Atta cephalotes]	1.24652	14.8841	4.20596	3.53881	0.00040194	0.0216107
Contig117711	#N/A	0.350099	14.8852	4.19909	3.54485	0.000392833	0.0212423
Contig18024	#N/A	0.353159	14.8859	4.19775	3.54615	0.000390898	0.02117
Contig62609	#N/A	0.331326	14.8908	4.19747	3.54756	0.000388811	0.0210651
Contig136419	#N/A	0.412285	14.8913	4.20596	3.54054	0.000399313	0.0214858
Contig116731	#N/A	0.491318	14.8928	4.19704	3.54841	0.000387564	0.0210056
Contig90881	#N/A	0.358303	14.9023	4.20596	3.54315	0.000395377	0.0212983
Contig135290	#N/A	0.152392	14.9032	4.19601	3.55176	0.000382666	0.0207712
Contig80616	#N/A	0.460609	14.9104	4.20596	3.54507	0.000392511	0.021233
Contig93839	#N/A	0.370103	14.9125	4.19545	3.55445	0.000378774	0.0206136
Contig36685	#N/A	0.214993	14.9334	4.19497	3.55983	0.000371098	0.0202687
Contig141983	#N/A	0.245006	14.9428	4.19323	3.56356	0.000365856	0.0200443
Contig150205	#N/A	1.74251	14.9535	4.20596	3.5553	0.000377543	0.020565
Contig36655	#N/A	0.537444	14.9545	4.20446	3.55681	0.000375391	0.0204636
Contig127162	#N/A	0.316553	14.9571	4.20596	3.55617	0.000376296	0.020505
Contig115608	#N/A	0.436301	14.9656	4.20203	3.56152	0.000368715	0.0201645
Contig54090	#N/A	0.286549	14.9795	4.20596	3.56149	0.000368763	0.0201645
Contig50640	#N/A	0.34208	14.9817	4.20596	3.56201	0.000368024	0.0201397
Contig94080	ref|XP_011060325.1| PREDICTED: uncharacterized protein LOC105149537 [Acromyrmex echinatior]	0.34208	14.9817	4.20596	3.56201	0.000368024	0.0201397
Contig81732	#N/A	0.506378	14.9833	4.20596	3.56239	0.000367493	0.0201262
Contig69066	#N/A	0.240551	14.9869	4.20102	3.56746	0.000360462	0.0197949
Contig99209	ref|XP_005102325.1| PREDICTED: probable pyruvate dehydrogenase E1 component subunit alpha, mitochondrial [Aplysia californica]	0.445259	14.9935	4.20596	3.56483	0.000364093	0.0199632
Contig61774	ref|XP_011169847.1| PREDICTED: uncharacterized protein LOC105202860 [Solenopsis invicta]	0.212108	15.0019	4.20596	3.56683	0.000361322	0.0198344
Contig24861	#N/A	0.179718	15.0026	4.196	3.57545	0.00034963	0.0193277
Contig141907	ref|XP_011633902.1| PREDICTED: zinc finger protein 583, partial [Pogonomyrmex barbatus]	0.130897	15.0036	4.19733	3.57457	0.000350811	0.0193702
Contig59887	#N/A	0.130897	15.0036	4.19733	3.57457	0.000350811	0.0193702
Contig62427	ref|XP_013297029.1| hypothetical protein NECAME_03935 [Necator americanus]	0.353721	15.0086	4.20596	3.56841	0.000359152	0.0197383
Contig128237	#N/A	0.186806	15.012	4.20596	3.56923	0.000358038	0.0196923
Contig80638	#N/A	0.186806	15.012	4.20596	3.56923	0.000358038	0.0196923
Contig94067	#N/A	0.371605	15.0173	4.20406	3.5721	0.000354128	0.0195458
Contig130050	ref|XP_011871373.1| PREDICTED: uncharacterized protein LOC105563955, partial [Vollenhovia emeryi]	0.393902	15.0176	4.19083	3.58344	0.000339093	0.0189036
Contig104790	#N/A	0.28867	15.0221	4.20205	3.57494	0.000350309	0.0193577
Contig38616	ref|XP_012543141.1| PREDICTED: protein VAC14 homolog [Monomorium pharaonis]	3.64023	15.0243	4.19461	3.58182	0.000341205	0.0189808
Contig87880	ref|XP_011877260.1| PREDICTED: LOW QUALITY PROTEIN: uncharacterized aarF domain-containing protein kinase 5 [Vollenhovia emeryi]	0.25467	15.0249	4.19532	3.58136	0.000341811	0.0189921
Contig93885	ref|XP_011696221.1| PREDICTED: probable multidrug resistance-associated protein lethal(2)03659 [Wasmannia auropunctata]	0.30017	15.0285	4.20312	3.57556	0.000349481	0.0193271
Contig51745	#N/A	0.527532	15.0315	4.1982	3.58047	0.000342976	0.0190269
Contig150255	#N/A	0.175911	15.0319	4.19491	3.58336	0.000339206	0.0189036
Contig146360	#N/A	0.202038	15.0331	4.19458	3.58393	0.000338457	0.0189024
Contig124855	ref|XP_011157661.1| PREDICTED: ras-related and estrogen-regulated growth inhibitor [Solenopsis invicta]	2.03036	15.0354	4.17596	3.60047	0.000317643	0.0179528
Contig22819	#N/A	0.314576	15.0417	4.20086	3.58062	0.000342779	0.0190234
Contig111960	#N/A	0.235768	15.0437	4.19515	3.58598	0.000335816	0.0187845
Contig65996	ref|XP_011633708.1| PREDICTED: sodium-independent sulfate anion transporter-like isoform X3 [Pogonomyrmex barbatus]	0.146322	15.0439	4.19813	3.58347	0.000339058	0.0189036
Contig37299	ref|XP_011859324.1| PREDICTED: tRNA (guanine(37)-N1)-methyltransferase-like [Vollenhovia emeryi]	1.87479	15.0469	4.19795	3.58436	0.00033791	0.0188793
Contig66514	ref|XP_012535774.1| PREDICTED: putative inorganic phosphate cotransporter [Monomorium pharaonis]	1.17618	15.0473	4.20414	3.57917	0.000344691	0.019107
Contig60563	#N/A	0.315399	15.0551	4.2026	3.58233	0.000340545	0.0189566
Contig143375	ref|XP_012525995.1| PREDICTED: uncharacterized protein LOC105830881 isoform X2 [Monomorium pharaonis]	1.10577	15.0561	4.20175	3.5833	0.000339282	0.0189036
Contig72689	ref|XP_012055254.1| PREDICTED: DNA repair protein RAD52 homolog [Atta cephalotes]	1.76546	15.0568	4.20301	3.58238	0.000340481	0.0189566
Contig109664	#N/A	0.284727	15.0602	4.19551	3.5896	0.000331191	0.0185921
Contig28044	ref|XP_011632710.1| PREDICTED: odorant receptor coreceptor [Pogonomyrmex barbatus]	0.831201	15.0634	4.19725	3.58887	0.000332118	0.0186367
Contig85323	#N/A	0.509294	15.0668	4.20596	3.58226	0.000340636	0.0189566
Contig33743	#N/A	0.491029	15.0832	4.20596	3.58616	0.000335589	0.0187793
Contig57461	#N/A	0.230406	15.085	4.20208	3.58988	0.000330831	0.0185793
Contig104157	#N/A	0.275501	15.0953	4.20359	3.59105	0.000329349	0.0185034
Contig139533	#N/A	0.549151	15.0957	4.20031	3.59396	0.000325691	0.0183489
Contig99920	#N/A	0.285696	15.0994	4.19296	3.60112	0.000316847	0.017915
Contig126107	#N/A	0.638549	15.1045	4.18081	3.61282	0.000302888	0.0172222
Contig57146	#N/A	0.816713	15.1121	4.20596	3.59302	0.000326866	0.0183932
Contig109553	ref|XP_011687687.1| PREDICTED: protein farnesyltransferase/geranylgeranyltransferase type-1 subunit alpha [Wasmannia auropunctata]	0.860046	15.113	4.20596	3.59324	0.000326596	0.0183853
Contig125435	ref|XP_011162806.1| PREDICTED: vigilin-like [Solenopsis invicta]	0.855996	15.1208	4.20102	3.59932	0.000319053	0.0180253
Contig95874	ref|XP_013090993.1| PREDICTED: dolichyl-diphosphooligosaccharide--protein glycosyltransferase subunit 2-like [Biomphalaria glabrata]	0.590513	15.132	4.20596	3.59775	0.000320978	0.0181196
Contig32674	#N/A	0.482422	15.136	4.19699	3.6064	0.000310474	0.0176252
Contig113781	#N/A	0.249101	15.1366	4.20172	3.60248	0.000315201	0.0178501
Contig87765	#N/A	0.22123	15.1389	4.20085	3.60377	0.000313634	0.0177689
Contig36583	#N/A	0.313025	15.1458	4.19796	3.6079	0.000308685	0.0175306
Contig110219	ref|XP_011866791.1| PREDICTED: protein virilizer isoform X3 [Vollenhovia emeryi]	1.02063	15.1491	4.18051	3.62375	0.000290361	0.0166527
Contig17682	#N/A	1.00679	15.1496	4.20209	3.60525	0.000311856	0.0176823
Contig100109	ref|XP_011865116.1| PREDICTED: chromatin assembly factor 1 subunit B [Vollenhovia emeryi]	2.98274	15.1503	4.17559	3.62829	0.000285299	0.0164404
Contig138243	ref|XP_011050396.1| PREDICTED: zinc finger protein 346-like [Acromyrmex echinatior]	1.16927	15.1566	4.1994	3.60922	0.000307115	0.0174485
Contig45839	#N/A	0.656483	15.1585	4.20419	3.60557	0.000311472	0.0176747
Contig119223	ref|XP_011859705.1| PREDICTED: UPF0329 protein ECU05_1680/ECU11_0050-like [Vollenhovia emeryi]	0.650342	15.159	4.19357	3.61482	0.000300552	0.017117
Contig53763	ref|XP_012530504.1| PREDICTED: 43 kDa receptor-associated protein of the synapse homolog isoform X1 [Monomorium pharaonis]	0.469809	15.1756	4.19985	3.61337	0.000302246	0.0171996
Contig149433	ref|XP_011881115.1| PREDICTED: sarcoplasmic calcium-binding protein 1 [Vollenhovia emeryi]	0.345769	15.1799	4.19234	3.62087	0.000293612	0.0167961
Contig48856	#N/A	0.257634	15.1909	4.19122	3.62445	0.000289575	0.016619
Contig42029	ref|XP_011863984.1| PREDICTED: uncharacterized protein LOC105559932 [Vollenhovia emeryi]	1.7247	15.207	3.46697	4.38625	1.1532e-05	0.00132365
Contig21545	#N/A	0.419708	15.2079	4.19769	3.62292	0.000291295	0.0166839
Contig63746	ref|XP_011173991.1| PREDICTED: uncharacterized protein LOC105206174, partial [Solenopsis invicta]	5.05915	15.2164	4.20596	3.61782	0.000297099	0.0169476
Contig86719	#N/A	0.18762	15.2242	4.20596	3.61967	0.000294975	0.0168537
Contig109279	#N/A	0.445924	15.2255	4.2007	3.62451	0.000289511	0.016619
Contig104617	#N/A	0.503686	15.227	4.20596	3.62035	0.000294209	0.0168235
Contig49574	#N/A	0.454488	15.2314	4.20596	3.62138	0.00029304	0.0167702
Contig138689	#N/A	0.448798	15.2315	4.20209	3.62474	0.000289248	0.0166138
Contig72391	#N/A	0.303054	15.2388	4.20596	3.62316	0.000291027	0.0166808
Contig107085	#N/A	0.165388	15.2412	4.19458	3.63355	0.000279552	0.0161752
Contig4487	ref|XP_011865488.1| PREDICTED: uncharacterized protein LOC105560735 [Vollenhovia emeryi]	0.165388	15.2412	4.19458	3.63355	0.000279552	0.0161752
Contig39976	#N/A	0.482322	15.2415	4.19705	3.63149	0.000281784	0.0162786
Contig93401	#N/A	0.745982	15.2471	4.19955	3.63065	0.000282703	0.0163136
Contig90450	#N/A	0.512723	15.255	4.20596	3.62701	0.000286723	0.0164956
Contig137253	ref|XP_011876243.1| PREDICTED: WD repeat-containing protein CG11141 isoform X1 [Vollenhovia emeryi]	2.63708	15.2631	4.18318	3.64869	0.00026358	0.015377
Contig89295	ref|XP_011873803.1| PREDICTED: uncharacterized protein LOC105565322 [Vollenhovia emeryi]	0.560882	15.2639	4.20596	3.62912	0.000284393	0.0163949
Contig130732	#N/A	0.443041	15.2652	4.18267	3.64964	0.000262612	0.0153395
Contig93865	#N/A	0.468258	15.2709	4.20596	3.63077	0.000282575	0.0163136
Contig110386	ref|XP_011700362.1| PREDICTED: glutamate receptor ionotropic, delta-1-like [Wasmannia auropunctata]	0.642241	15.2738	4.20596	3.63148	0.0002818	0.0162786
Contig94991	ref|XP_011878850.1| PREDICTED: uncharacterized protein LOC105568076 [Vollenhovia emeryi]	0.477414	15.281	4.20025	3.63812	0.000274636	0.0159346
Contig74417	#N/A	0.335202	15.2955	4.19669	3.64466	0.000267742	0.0155898
Contig40197	ref|XP_004207219.1| PREDICTED: zinc finger MYM-type protein 1-like [Hydra vulgaris]	0.301798	15.3052	4.19319	3.65002	0.000262222	0.0153231
Contig20936	#N/A	0.527764	15.3084	4.20171	3.64337	0.000269093	0.0156598
Contig97241	#N/A	0.182275	15.3172	4.20518	3.64248	0.000270029	0.0157013
Contig50496	ref|XP_011876720.1| PREDICTED: cytoplasmic dynein 2 heavy chain 1 [Vollenhovia emeryi]	0.266661	15.322	4.204	3.64463	0.00026778	0.0155898
Contig66186	#N/A	0.786181	15.3245	3.12791	4.89929	9.6186e-07	0.000187978
Contig48192	#N/A	0.494718	15.3304	4.20105	3.64919	0.00026307	0.0153599
Contig149261	#N/A	0.474832	15.3347	4.20101	3.65023	0.000262001	0.0153165
Contig124242	ref|XP_011858704.1| PREDICTED: uncharacterized protein LOC105556230, partial [Vollenhovia emeryi]	0.905379	15.3366	4.19747	3.65377	0.000258418	0.0151509
Contig71169	ref|XP_011697991.1| PREDICTED: WD repeat-containing protein 47 isoform X1 [Wasmannia auropunctata]	0.847303	15.3485	4.20419	3.65077	0.000261456	0.015291
Contig58374	ref|XP_011861491.1| PREDICTED: UDP-galactose translocator isoform X2 [Vollenhovia emeryi]	0.584535	15.3567	4.20596	3.65118	0.000261036	0.015279
Contig129165	ref|XP_012533032.1| PREDICTED: regulating synaptic membrane exocytosis protein 2 isoform X2 [Monomorium pharaonis]	0.831768	15.3608	4.18218	3.67292	0.000239797	0.0142065
Contig46213	#N/A	0.324951	15.3635	4.18682	3.6695	0.000243022	0.0143675
Contig137307	ref|XP_012522436.1| PREDICTED: glycerol-3-phosphate dehydrogenase [NAD(+)], cytoplasmic-like isoform X2 [Monomorium pharaonis]	0.623982	15.3642	4.20596	3.65296	0.000259232	0.0151923
Contig86096	ref|XP_011881890.1| PREDICTED: uncharacterized protein LOC105569775 [Vollenhovia emeryi]	0.290954	15.3649	4.20133	3.65715	0.00025504	0.0149715
Contig74074	ref|XP_011860502.1| PREDICTED: tubulin polyglutamylase TTLL5 [Vollenhovia emeryi]	0.426756	15.3661	4.18888	3.66831	0.000244155	0.0144284
Contig103727	ref|XP_011881461.1| PREDICTED: flavin-containing monooxygenase FMO GS-OX-like 3 [Vollenhovia emeryi]	0.299851	15.3856	4.20045	3.66285	0.000249422	0.0147028
Contig57533	ref|XP_011161726.1| PREDICTED: uncharacterized protein LOC105197177 [Solenopsis invicta]	0.15929	15.3888	4.19738	3.6663	0.000246085	0.0145182
Contig147	#N/A	0.899844	15.398	4.20596	3.661	0.000251233	0.014791
Contig48811	#N/A	0.456107	15.4023	4.20596	3.66201	0.000250242	0.0147388
Contig73254	#N/A	0.378227	15.4057	4.2004	3.66767	0.000244769	0.0144587
Contig3874	#N/A	0.564181	15.4063	4.19602	3.67166	0.000240983	0.0142648
Contig51131	#N/A	1.21463	15.4352	4.20596	3.66985	0.000242691	0.0143572
Contig123743	#N/A	0.371227	15.4416	4.19982	3.67673	0.000236243	0.0140313
Contig133634	#N/A	0.250464	15.4456	4.18869	3.68746	0.000226502	0.0134925
Contig43177	#N/A	0.361149	15.4476	4.18673	3.68965	0.000224561	0.0134221
Contig86871	#N/A	0.536131	15.4511	4.20596	3.67363	0.000239129	0.0141848
Contig45796	#N/A	0.321903	15.4525	4.19904	3.68001	0.000233228	0.0138697
Contig71524	ref|XP_011684583.1| PREDICTED: cathepsin O-like [Wasmannia auropunctata]	0.839501	15.4564	4.20596	3.67489	0.000237949	0.0141267
Contig27918	#N/A	0.503295	15.4772	4.19622	3.68838	0.00022569	0.0134596
Contig31164	#N/A	0.991722	15.5027	4.19997	3.69114	0.000223254	0.0133496
Contig7781	ref|XP_011057317.1| PREDICTED: monoacylglycerol lipase ABHD12 isoform X3 [Acromyrmex echinatior]	1.4287	15.5177	4.19843	3.69607	0.000218964	0.0131488
Contig59431	ref|XP_008551277.1| PREDICTED: phosphate carrier protein, mitochondrial [Microplitis demolitor]	0.467747	15.5178	4.20596	3.68949	0.000224707	0.0134251
Contig65259	#N/A	0.248941	15.5316	4.20596	3.69275	0.00022184	0.0132707
Contig76669	ref|XP_011702831.1| PREDICTED: uncharacterized protein LOC105458912 [Wasmannia auropunctata]	0.274817	15.5425	4.19491	3.70508	0.000211327	0.012728
Contig120166	#N/A	0.258932	15.5471	4.19293	3.70794	0.000208955	0.012612
Contig131473	ref|XP_012527504.1| PREDICTED: uncharacterized protein LOC105831706 isoform X1 [Monomorium pharaonis]	1.02495	15.5549	4.20596	3.69831	0.000217039	0.0130553
Contig64219	#N/A	2.54253	15.5633	4.19904	3.7064	0.000210229	0.0126727
Contig36268	#N/A	0.223075	15.5769	4.20208	3.70696	0.000209763	0.01265
Contig48336	#N/A	0.597546	15.5834	4.20104	3.70942	0.000207735	0.0125598
Contig99985	#N/A	1.13402	15.5911	4.19481	3.71675	0.000201801	0.0122535
Contig65491	#N/A	0.725369	15.6003	4.20596	3.70911	0.000207993	0.01257
Contig70614	#N/A	0.910898	15.6024	4.20596	3.70961	0.000207582	0.0125598
Contig76435	#N/A	0.316595	15.6066	4.20447	3.71191	0.000205701	0.0124582
Contig57445	#N/A	0.439968	15.6101	4.1994	3.71724	0.000201415	0.0122405
Contig40248	ref|XP_011066678.1| PREDICTED: DNA-directed RNA polymerase III subunit RPC2 [Acromyrmex echinatior]	0.391665	15.6179	4.19443	3.72349	0.000196488	0.0119876
Contig40535	ref|XP_012220714.1| PREDICTED: uncharacterized protein LOC105671287 isoform X2 [Linepithema humile]	1.14043	15.6211	3.6095	4.32776	1.50633e-05	0.00156952
Contig87853	ref|XP_011861915.1| PREDICTED: serine/threonine-protein kinase fused [Vollenhovia emeryi]	1.89229	15.6219	4.19787	3.72139	0.000198131	0.0120566
Contig75254	ref|XP_011051558.1| PREDICTED: transcription factor Dp-1 [Acromyrmex echinatior]	0.39573	15.6224	4.19846	3.72099	0.000198446	0.0120705
Contig128660	ref|XP_011685218.1| PREDICTED: tachykinin-like peptides receptor 86C [Wasmannia auropunctata]	0.28697	15.665	4.18687	3.74145	0.000182959	0.0112594
Contig118032	ref|XP_011867182.1| PREDICTED: mucin-4-like [Vollenhovia emeryi]	0.442668	15.6715	4.02717	3.89144	9.96518e-05	0.00664488
Contig149268	ref|XP_011165833.1| PREDICTED: colorectal mutant cancer protein isoform X2 [Solenopsis invicta]	0.576271	15.6725	4.1931	3.73769	0.000185721	0.0114095
Contig72829	ref|XP_012531225.1| PREDICTED: protein claret segregational [Monomorium pharaonis]	0.639985	15.6901	4.20596	3.73044	0.000191145	0.0116868
Contig70370	#N/A	0.208154	15.6926	4.20158	3.73492	0.000187776	0.0115107
Contig53467	#N/A	0.263605	15.6957	4.19232	3.74392	0.000181173	0.0111592
Contig100474	#N/A	0.570231	15.7046	4.20289	3.73663	0.0001865	0.0114424
Contig12098	#N/A	0.717966	15.7077	4.20596	3.73463	0.000187993	0.011514
Contig83145	#N/A	0.92932	15.7095	4.20596	3.73507	0.000187663	0.0115088
Contig26491	ref|XP_011869035.1| PREDICTED: cell adhesion molecule 2-like [Vollenhovia emeryi]	0.798096	15.7112	4.18463	3.75449	0.000173695	0.0107832
Contig118731	#N/A	0.405535	15.7245	4.18091	3.76101	0.000169227	0.0105475
Contig52634	#N/A	0.410651	15.7339	4.19932	3.74677	0.000179123	0.0110667
Contig85478	ref|XP_012055737.1| PREDICTED: trithorax group protein osa [Atta cephalotes]	0.170014	15.7467	4.19757	3.7514	0.000175852	0.0108837
Contig90558	ref|XP_015757155.1| PREDICTED: uncharacterized protein LOC107336602 isoform X1 [Acropora digitifera]	0.170014	15.7467	4.19757	3.7514	0.000175852	0.0108837
Contig133412	ref|XP_011685087.1| PREDICTED: uncharacterized protein YJR142W [Wasmannia auropunctata]	1.22251	15.747	4.20596	3.74397	0.000181139	0.0111592
Contig128672	#N/A	0.486761	15.7482	4.1959	3.75323	0.000174574	0.0108187
Contig22407	#N/A	21.2751	15.7504	4.20596	3.74478	0.000180554	0.0111308
Contig44448	#N/A	0.230524	15.7539	4.20596	3.74561	0.000179958	0.0111037
Contig81161	#N/A	0.230524	15.7539	4.20596	3.74561	0.000179958	0.0111037
Contig40979	#N/A	33.8601	15.7575	4.1977	3.75385	0.000174139	0.0108027
Contig62510	#N/A	0.413674	15.7649	4.18161	3.77006	0.000163207	0.0102229
Contig47443	#N/A	0.572898	15.7706	4.20596	3.74958	0.000177131	0.0109532
Contig49418	#N/A	0.56577	15.7831	4.19057	3.76633	0.000165666	0.010353
Contig124208	ref|XP_011162899.1| PREDICTED: chymotrypsin-1, partial [Solenopsis invicta]	22.5916	15.784	4.20027	3.75786	0.000171374	0.0106532
Contig38476	ref|XP_011566550.1| PREDICTED: uncharacterized protein LOC105396259 [Plutella xylostella]	2.80709	15.7902	4.20047	3.75915	0.000170494	0.0106171
Contig138886	ref|XP_012531029.1| PREDICTED: uncharacterized protein LOC105833661 isoform X3 [Monomorium pharaonis]	1.42244	15.8016	4.20596	3.75695	0.000171997	0.0106872
Contig60532	#N/A	0.215738	15.8059	4.20596	3.75797	0.000171295	0.0106529
Contig67266	#N/A	0.215738	15.8059	4.20596	3.75797	0.000171295	0.0106529
Contig116509	#N/A	0.195781	15.8075	4.20208	3.76182	0.00016868	0.0105181
Contig82877	#N/A	0.561041	15.8139	4.20097	3.76434	0.000166987	0.0104309
Contig98837	#N/A	0.862296	15.8291	4.20596	3.76351	0.000167548	0.0104521
Contig16662	ref|XP_012530120.1| PREDICTED: uncharacterized protein LOC105833160 isoform X1 [Monomorium pharaonis]	0.318609	15.8445	4.18623	3.78491	0.000153763	0.00970788
Contig41878	ref|XP_011164051.1| PREDICTED: protein phosphatase 1 regulatory subunit 12A isoform X6 [Solenopsis invicta]	1.43988	15.8831	4.1935	3.78755	0.00015214	0.00963985
Contig113021	ref|XP_011863611.1| PREDICTED: Fanconi anemia group J protein homolog isoform X2 [Vollenhovia emeryi]	1.60962	15.8894	4.1983	3.78472	0.00015388	0.00971096
Contig58733	ref|XP_011175785.1| PREDICTED: coiled-coil domain-containing protein 93-like, partial [Solenopsis invicta]	0.666062	15.9031	4.19916	3.78721	0.000152349	0.00964148
Contig22191	ref|XP_011701882.1| PREDICTED: origin recognition complex subunit 4 isoform X1 [Wasmannia auropunctata]	0.494762	15.9159	4.19964	3.78981	0.000150761	0.00956535
Contig14242	ref|XP_011878433.1| PREDICTED: uncharacterized protein LOC105567836 [Vollenhovia emeryi]	0.206281	15.9194	4.20208	3.78845	0.000151588	0.00961352
Contig95744	#N/A	0.221283	15.9238	4.20596	3.78601	0.000153084	0.00966933
Contig61586	ref|XP_011630268.1| PREDICTED: protein EMSY isoform X1 [Pogonomyrmex barbatus]	0.789349	15.9291	3.19795	4.98103	6.3247e-07	0.000133311
Contig52146	#N/A	1.37419	15.9293	4.18976	3.80196	0.000143554	0.00916572
Contig135620	#N/A	1.46783	15.9296	4.19826	3.79434	0.000148037	0.00940944
Contig36383	ref|XP_012059565.1| PREDICTED: dedicator of cytokinesis protein 3 [Atta cephalotes]	1.7451	15.93	4.1977	3.79492	0.000147689	0.00939152
Contig97645	#N/A	0.583068	15.9324	4.20203	3.7916	0.000149677	0.00950941
Contig18245	ref|XP_012058474.1| PREDICTED: SOX domain-containing protein dichaete-like [Atta cephalotes]	4.75904	15.9485	4.18918	3.80708	0.00014062	0.0089865
Contig36661	#N/A	0.459113	15.9519	4.19899	3.79898	0.000145292	0.00925999
Contig82244	#N/A	1.19551	15.9608	4.2	3.80018	0.000144592	0.00922786
Contig99660	ref|XP_011873949.1| PREDICTED: chymotrypsin-2-like [Vollenhovia emeryi]	6.03634	15.9655	4.20596	3.79592	0.000147097	0.00935908
Contig1460	#N/A	0.424493	16.0005	4.19703	3.81234	0.000137656	0.00881302
Contig44376	ref|XP_012522958.1| PREDICTED: myosin-IA [Monomorium pharaonis]	0.307244	16.0011	4.20162	3.80832	0.000139914	0.00894543
Contig60283	#N/A	0.217807	16.0013	4.19646	3.81305	0.000137262	0.00879179
Contig44441	#N/A	0.288086	16.0112	4.20191	3.81045	0.000138713	0.0088727
Contig132921	#N/A	0.480345	16.0178	4.19994	3.81381	0.000136838	0.00876862
Contig126391	#N/A	0.413165	16.0367	4.2021	3.81636	0.000135432	0.00869431
Contig148256	ref|XP_011639327.1| PREDICTED: LOW QUALITY PROTEIN: zinc finger protein on ecdysone puffs [Pogonomyrmex barbatus]	2.83062	16.0401	4.19286	3.82557	0.000130473	0.00841798
Contig72091	#N/A	0.442707	16.045	4.20596	3.81482	0.000136283	0.00874101
Contig33499	#N/A	0.747665	16.0563	4.19669	3.82596	0.000130266	0.0084085
Contig41805	ref|XP_012528572.1| PREDICTED: BTB/POZ domain-containing protein 3-like [Monomorium pharaonis]	4.6227	16.0583	4.20596	3.81798	0.000134549	0.00864151
Contig142357	ref|XP_011873621.1| PREDICTED: uncharacterized protein LOC105565222 isoform X1 [Vollenhovia emeryi]	0.678656	16.0616	4.19945	3.82469	0.000130939	0.00843847
Contig150187	#N/A	0.120268	16.0643	4.20484	3.82044	0.000133214	0.00855968
Contig147064	ref|XP_011871302.1| PREDICTED: dynein heavy chain 8, axonemal [Vollenhovia emeryi]	1.40585	16.0651	4.20042	3.82465	0.000130959	0.00843847
Contig95252	ref|XP_011869392.1| PREDICTED: soluble guanylate cyclase 88E isoform X2 [Vollenhovia emeryi]	0.410664	16.0743	4.20596	3.82179	0.000132489	0.00852473
Contig10547	#N/A	0.689835	16.0756	4.18434	3.84184	0.000122115	0.00793311
Contig40158	ref|XP_011872163.1| PREDICTED: probable G-protein coupled receptor 158 [Vollenhovia emeryi]	1.01238	16.0774	4.20596	3.82253	0.000132088	0.0085028
Contig37400	ref|XP_012059510.1| PREDICTED: CCR4-NOT transcription complex subunit 10 [Atta cephalotes]	0.437898	16.0787	4.19486	3.83295	0.000126615	0.00820284
Contig66950	ref|XP_011877076.1| PREDICTED: uncharacterized protein LOC105567114 isoform X1 [Vollenhovia emeryi]	0.696019	16.0846	4.19997	3.8297	0.0001283	0.00830054
Contig141603	#N/A	0.296963	16.0918	4.20069	3.83076	0.000127747	0.00826858
Contig101814	#N/A	0.102776	16.1091	4.19944	3.836	0.000125054	0.00812029
Contig26750	#N/A	0.974104	16.1215	3.23527	4.98304	6.25939e-07	0.0001324
Contig60667	#N/A	0.301663	16.122	4.20411	3.83483	0.000125653	0.00815168
Contig32360	#N/A	1.15985	16.1477	4.20138	3.84342	0.000121333	0.00789318
Contig70441	#N/A	0.164508	16.148	4.19671	3.84778	0.000119193	0.00776827
Contig127648	ref|XP_011059230.1| PREDICTED: inositol-3-phosphate synthase 1-B isoform X2 [Acromyrmex echinatior]	1.45385	16.1612	4.19315	3.85418	0.000116117	0.00758172
Contig126657	ref|XP_011862366.1| PREDICTED: flocculation protein FLO11-like [Vollenhovia emeryi]	1.2558	16.1627	4.20596	3.84281	0.000121635	0.00790916
Contig118532	#N/A	0.371512	16.1971	4.18848	3.86706	0.000110156	0.00723942
Contig99958	#N/A	0.334609	16.1975	4.2	3.85654	0.000115001	0.00751937
Contig122816	ref|XP_011860556.1| PREDICTED: 2-amino-3-ketobutyrate coenzyme A ligase, mitochondrial [Vollenhovia emeryi]	2.17711	16.2002	4.19837	3.85869	0.000113996	0.00746053
Contig74289	#N/A	1.51505	16.204	4.2	3.85809	0.000114278	0.0074755
Contig141530	#N/A	0.231222	16.2138	4.2	3.86042	0.00011319	0.0074181
Contig90142	ref|XP_011878257.1| PREDICTED: A-kinase anchor protein 10, mitochondrial [Vollenhovia emeryi]	0.182574	16.2316	4.20207	3.86275	0.000112118	0.00735466
Contig125303	#N/A	0.189315	16.239	4.20069	3.86578	0.000110733	0.00727054
Contig92247	#N/A	1.30363	16.2453	4.20596	3.86246	0.000112253	0.0073601
Contig666	#N/A	0.604989	16.2656	4.18042	3.89091	9.98707e-05	0.00665006
Contig82549	ref|XP_011687433.1| PREDICTED: ectopic P granules protein 5 homolog, partial [Wasmannia auropunctata]	0.376374	16.2734	4.20101	3.87367	0.000107207	0.00706205
Contig65328	ref|XP_011647606.1| PREDICTED: phospholipase A1 member A, partial [Pogonomyrmex barbatus]	0.314028	16.2793	4.19547	3.8802	0.00010437	0.00690409
Contig126693	ref|XP_016917482.1| PREDICTED: uncharacterized protein LOC108001128 isoform X4 [Apis cerana]	0.583614	16.2878	4.20006	3.878	0.000105319	0.00696039
Contig94519	ref|XP_011056972.1| PREDICTED: chromosome-associated kinesin KIF4-like [Acromyrmex echinatior]	3.61888	16.2884	4.20041	3.87781	0.000105402	0.006962
Contig119945	ref|XP_012530723.1| PREDICTED: mitogen-activated protein kinase-binding protein 1-like isoform X3 [Monomorium pharaonis]	0.195716	16.2917	4.1921	3.88629	0.000101789	0.00675235
Contig52242	ref|XP_011063807.1| PREDICTED: protein FRA10AC1 homolog [Acromyrmex echinatior]	1.8985	16.2942	4.19453	3.88464	0.000102483	0.00679343
Contig52566	#N/A	0.243958	16.298	4.20596	3.87498	0.000106635	0.00702759
Contig32779	#N/A	0.411209	16.309	4.18008	3.90159	9.55619e-05	0.00641454
Contig146613	ref|XP_006559932.1| PREDICTED: endophilin-A [Apis mellifera]	0.822636	16.3156	3.08536	5.28807	1.23611e-07	3.44494e-05
Contig95695	#N/A	0.634802	16.3343	4.19731	3.89162	9.95779e-05	0.00664309
Contig59199	ref|XP_011639967.1| PREDICTED: glutamate receptor ionotropic, NMDA 2B isoform X3 [Pogonomyrmex barbatus]	2.06039	16.3371	4.19905	3.89068	9.99648e-05	0.00665319
Contig107559	ref|XP_012150849.1| PREDICTED: uncharacterized protein LOC100882311 [Megachile rotundata]	0.168192	16.3402	4.20208	3.88859	0.000100827	0.00670521
Contig61459	ref|XP_012216661.1| PREDICTED: hemicentin-2 [Linepithema humile]	0.875331	16.3415	4.20418	3.88695	0.00010151	0.00674334
Contig84832	#N/A	0.378837	16.3596	4.20419	3.89125	9.97297e-05	0.00664694
Contig122314	ref|XP_012538962.1| PREDICTED: calcium-independent phospholipase A2-gamma-like isoform X3 [Monomorium pharaonis]	0.896556	16.3673	4.20136	3.89572	9.79062e-05	0.00654702
Contig57893	ref|XP_011871377.1| PREDICTED: protein SHQ1 homolog isoform X3 [Vollenhovia emeryi]	0.22217	16.3723	4.19613	3.90177	9.54913e-05	0.00641285
Contig46103	#N/A	0.188293	16.3871	4.20208	3.89976	9.62879e-05	0.00645714
Contig38515	#N/A	0.386888	16.391	4.19684	3.90556	9.40064e-05	0.00632516
Contig55634	#N/A	0.32111	16.4015	4.18807	3.91624	8.99401e-05	0.00608925
Contig36551	#N/A	0.880063	16.4017	4.19489	3.90992	9.23266e-05	0.00622993
Contig48251	#N/A	0.385358	16.4031	4.20596	3.89996	9.62073e-05	0.0064548
Contig43178	ref|XP_012233688.1| PREDICTED: uncharacterized protein LOC105678719 isoform X3 [Linepithema humile]	0.474322	16.411	4.20098	3.90647	9.36529e-05	0.00630437
Contig116034	#N/A	0.174841	16.4124	4.19224	3.91494	9.04272e-05	0.00611929
Contig52754	ref|XP_013190478.1| PREDICTED: retrovirus-related Pol polyprotein from transposon TNT 1-94 [Amyelois transitella]	0.206959	16.4172	4.20596	3.90333	9.48778e-05	0.00637771
Contig77715	#N/A	0.206959	16.4172	4.20596	3.90333	9.48778e-05	0.00637771
Contig103655	#N/A	0.293265	16.4225	4.19938	3.91071	9.2027e-05	0.00621565
Contig142999	#N/A	0.207253	16.4398	4.20208	3.91229	9.14237e-05	0.00618081
Contig137771	#N/A	0.320235	16.4488	4.19689	3.91929	8.88119e-05	0.00602441
Contig88629	#N/A	0.217832	16.4586	4.20208	3.91676	8.97455e-05	0.00607899
Contig132445	#N/A	1.055	16.4674	4.19498	3.92551	8.65455e-05	0.00589331
Contig124750	ref|XP_011860077.1| PREDICTED: aminopeptidase N-like, partial [Vollenhovia emeryi]	0.130853	16.469	4.1959	3.92502	8.67242e-05	0.0058998
Contig95681	ref|XP_011055938.1| PREDICTED: lysosomal aspartic protease-like [Acromyrmex echinatior]	0.130853	16.469	4.1959	3.92502	8.67242e-05	0.0058998
Contig26717	ref|XP_011175768.1| PREDICTED: uncharacterized protein LOC105207821 [Solenopsis invicta]	4.64072	16.4742	4.19916	3.92321	8.73783e-05	0.00593857
Contig103375	ref|XP_011863786.1| PREDICTED: saccharopine dehydrogenase-like oxidoreductase [Vollenhovia emeryi]	2.3124	16.476	4.17623	3.94519	7.97362e-05	0.00549853
Contig69352	#N/A	0.236612	16.4781	4.20596	3.91781	8.93567e-05	0.00605556
Contig38770	ref|XP_011873177.1| PREDICTED: calponin homology domain-containing protein DDB_G0272472-like [Vollenhovia emeryi]	0.800462	16.4849	4.19232	3.93216	8.41846e-05	0.00574362
Contig58804	ref|XP_011704437.1| PREDICTED: WD repeat-containing protein 60 [Wasmannia auropunctata]	1.77176	16.5062	4.17777	3.95096	7.78368e-05	0.00537542
Contig28948	#N/A	0.837156	16.536	4.19855	3.93849	8.19959e-05	0.00561871
Contig147167	ref|XP_011874015.1| PREDICTED: dual oxidase maturation factor 1 [Vollenhovia emeryi]	1.62875	16.5374	4.19026	3.94663	7.92594e-05	0.00546832
Contig139727	ref|XP_011701218.1| PREDICTED: integrin alpha-3-like [Wasmannia auropunctata]	0.257085	16.5407	4.20069	3.9376	8.23002e-05	0.00563137
Contig78907	ref|XP_012529088.1| PREDICTED: NAD-dependent protein deacetylase sirtuin-2 [Monomorium pharaonis]	3.69973	16.5579	3.12758	5.29416	1.19563e-07	3.37047e-05
Contig143968	#N/A	0.25227	16.5674	4.20205	3.9427	8.05688e-05	0.00552896
Contig61345	ref|XP_012531676.1| PREDICTED: uncharacterized protein LOC105834031 [Monomorium pharaonis]	0.251903	16.5703	4.20596	3.93973	8.15738e-05	0.00559521
Contig87614	ref|XP_011864998.1| PREDICTED: SET and MYND domain-containing protein 4-like [Vollenhovia emeryi]	2.47246	16.6084	2.41118	6.88808	5.65524e-12	8.41125e-09
Contig54289	ref|XP_011646024.1| PREDICTED: LOW QUALITY PROTEIN: trafficking protein particle complex subunit 11 [Pogonomyrmex barbatus]	1.04216	16.6128	4.19571	3.95946	7.51184e-05	0.00520805
Contig79389	#N/A	0.524809	16.6189	4.20596	3.95128	7.77349e-05	0.005371
Contig37384	ref|XP_012063448.1| PREDICTED: A-kinase anchor protein 9-like [Atta cephalotes]	0.938473	16.6237	4.2001	3.95793	7.56037e-05	0.00523399
Contig44563	ref|XP_012058062.1| PREDICTED: uncharacterized protein LOC105621200 [Atta cephalotes]	7.27253	16.6238	4.19828	3.95968	7.5049e-05	0.00520579
Contig37132	ref|XP_012223310.1| PREDICTED: SH3 and multiple ankyrin repeat domains protein 3 isoform X4 [Linepithema humile]	0.90169	16.6293	4.1993	3.96002	7.4944e-05	0.00520107
Contig85439	#N/A	1.30013	16.6334	4.2021	3.95836	7.54664e-05	0.00522705
Contig116948	ref|XP_011871016.1| PREDICTED: mpv17-like protein 2 [Vollenhovia emeryi]	4.29212	16.6341	3.02234	5.50373	3.71847e-08	1.32012e-05
Contig148096	#N/A	0.291411	16.667	4.18784	3.97985	6.89578e-05	0.0048523
Contig39570	#N/A	0.421117	16.6726	4.19899	3.97062	7.16871e-05	0.00500969
Contig95171	ref|XP_011873119.1| PREDICTED: nuclear pore complex protein Nup88 [Vollenhovia emeryi]	2.33007	16.6891	2.82656	5.90437	3.54005e-09	2.09288e-06
Contig112923	#N/A	0.33295	16.691	4.19182	3.98181	6.83935e-05	0.00482707
Contig34118	#N/A	0.910448	16.7043	4.20041	3.97682	6.98442e-05	0.00490009
Contig122268	ref|XP_012060634.1| PREDICTED: uncharacterized protein LOC105623871 [Atta cephalotes]	0.919418	16.7051	4.19297	3.98407	6.77435e-05	0.00478837
Contig133443	#N/A	0.251788	16.7217	4.2017	3.97974	6.89913e-05	0.0048523
Contig102328	ref|XP_012525201.1| PREDICTED: uncharacterized protein LOC105830435 [Monomorium pharaonis]	0.361925	16.7287	4.18502	3.99728	6.40744e-05	0.00456557
Contig44519	ref|XP_011699418.1| PREDICTED: putative nuclease HARBI1 [Wasmannia auropunctata]	1.32643	16.7299	4.19486	3.9882	6.65778e-05	0.00471541
Contig137388	ref|XP_011871962.1| PREDICTED: protein Mpv17 isoform X2 [Vollenhovia emeryi]	0.239996	16.7302	4.20208	3.98142	6.85051e-05	0.00483253
Contig64186	#N/A	0.59502	16.7425	4.20596	3.98067	6.87213e-05	0.00483881
Contig65318	#N/A	0.668429	16.7494	4.19913	3.98879	6.6412e-05	0.00470838
Contig79661	ref|XP_011168829.1| PREDICTED: uncharacterized protein LOC105202139 [Solenopsis invicta]	1.2908	16.7505	4.19145	3.99636	6.43241e-05	0.00457938
Contig46940	ref|XP_002741821.1| PREDICTED: 60S ribosomal protein L11-like [Saccoglossus kowalevskii]	0.149269	16.7628	4.19529	3.99563	6.45238e-05	0.00458372
Contig45291	#N/A	0.225133	16.7648	4.20208	3.98965	6.61707e-05	0.00469364
Contig9756	ref|XP_012060270.1| PREDICTED: RING-box protein 2 [Atta cephalotes]	0.595826	16.7667	4.18565	4.00575	6.18197e-05	0.00442276
Contig9617	ref|XP_011068287.1| PREDICTED: putative ATP-dependent RNA helicase TDRD12 [Acromyrmex echinatior]	5.60344	16.7788	4.19905	3.99586	6.44592e-05	0.00458143
Contig134196	#N/A	0.146404	16.7878	4.19819	3.99883	6.36557e-05	0.00454031
Contig71650	ref|XP_012525329.1| PREDICTED: coiled-coil domain-containing protein 112-like [Monomorium pharaonis]	1.91835	16.789	4.19266	4.00439	6.21783e-05	0.00444616
Contig86403	ref|XP_011695782.1| PREDICTED: WD repeat-containing protein 43 [Wasmannia auropunctata]	2.64574	16.809	4.19353	4.00833	6.11499e-05	0.00438817
Contig68786	ref|XP_014467573.1| PREDICTED: uncharacterized protein LOC106740753 isoform X1 [Dinoponera quadriceps]	0.271667	16.8207	4.20596	3.99926	6.35409e-05	0.00453441
Contig44027	#N/A	0.495804	16.8243	4.1902	4.01516	5.94054e-05	0.00428255
Contig70393	#N/A	0.241379	16.8295	4.19426	4.01251	6.00769e-05	0.00432158
Contig118442	#N/A	0.761445	16.8355	4.19579	4.01246	6.00891e-05	0.00432158
Contig114946	ref|XP_011690037.1| PREDICTED: putative ATPase N2B [Wasmannia auropunctata]	3.7395	16.8385	2.79243	6.03006	1.63903e-09	1.10281e-06
Contig114376	#N/A	0.429801	16.8546	4.2042	4.00899	6.0979e-05	0.00437812
Contig135283	#N/A	0.219573	16.8654	4.20208	4.01359	5.9803e-05	0.00430683
Contig89307	ref|XP_011067932.1| PREDICTED: nuclear pore complex protein DDB_G0274915 homolog [Acromyrmex echinatior]	0.256622	16.8665	4.20208	4.01384	5.97399e-05	0.00430447
Contig44282	ref|XP_011704430.1| PREDICTED: cytochrome P450 6B7-like isoform X2 [Wasmannia auropunctata]	0.16902	16.8683	4.19658	4.01953	5.83132e-05	0.00421026
Contig62700	#N/A	0.344225	16.8708	4.19705	4.01968	5.82769e-05	0.00420979
Contig7055	ref|XP_011311728.1| PREDICTED: uncharacterized protein LOC105271709 [Fopius arisanus]	0.535273	16.872	4.19595	4.02102	5.79466e-05	0.00419029
Contig84751	ref|XP_011861842.1| PREDICTED: transmembrane and TPR repeat-containing protein 4 isoform X1 [Vollenhovia emeryi]	0.797283	16.8737	4.19301	4.02426	5.71554e-05	0.00414573
Contig81741	#N/A	0.311843	16.8936	4.20242	4.01997	5.82049e-05	0.00420674
Contig65805	#N/A	0.146703	16.8944	4.19686	4.02549	5.68563e-05	0.00412616
Contig76575	#N/A	0.146703	16.8944	4.19686	4.02549	5.68563e-05	0.00412616
Contig40838	ref|XP_011305768.1| PREDICTED: uncharacterized protein LOC105268154 [Fopius arisanus]	0.225237	16.8981	4.20208	4.02136	5.78637e-05	0.00419029
Contig61357	#N/A	0.225237	16.8981	4.20208	4.02136	5.78637e-05	0.00419029
Contig131207	#N/A	0.416563	16.9126	4.2	4.0268	5.654e-05	0.00410742
Contig101026	#N/A	0.212803	16.9258	4.20208	4.02797	5.62607e-05	0.00408923
Contig41224	#N/A	1.3867	16.9393	4.1993	4.03384	5.48719e-05	0.00400477
Contig78984	ref|XP_011707083.1| PREDICTED: dynein heavy chain 1, axonemal-like, partial [Wasmannia auropunctata]	0.45212	16.9412	4.19772	4.0358	5.44161e-05	0.00397767
Contig116212	#N/A	0.141143	16.9464	4.19891	4.0359	5.43935e-05	0.00397767
Contig131365	ref|XP_011630184.1| PREDICTED: basement membrane-specific heparan sulfate proteoglycan core protein-like isoform X1 [Pogonomyrmex barbatus]	0.141143	16.9464	4.19891	4.0359	5.43935e-05	0.00397767
Contig143900	#N/A	0.141143	16.9464	4.19891	4.0359	5.43935e-05	0.00397767
Contig149184	#N/A	0.141143	16.9464	4.19891	4.0359	5.43935e-05	0.00397767
Contig25296	#N/A	0.141143	16.9464	4.19891	4.0359	5.43935e-05	0.00397767
Contig56580	ref|XP_011873188.1| PREDICTED: LOW QUALITY PROTEIN: uncharacterized protein LOC105564994 [Vollenhovia emeryi]	0.949943	16.9787	4.20278	4.03988	5.3479e-05	0.00392337
Contig52109	#N/A	0.229997	16.9817	4.20208	4.04127	5.31615e-05	0.00390616
Contig150217	#N/A	0.578622	16.9859	4.1765	4.06702	4.76179e-05	0.00358459
Contig122598	#N/A	0.238623	17.0003	4.20207	4.0457	5.2167e-05	0.00384108
Contig106096	#N/A	0.448786	17.0155	4.19922	4.05207	5.07674e-05	0.00375994
Contig100437	#N/A	0.57169	17.0218	4.20105	4.0518	5.08255e-05	0.00375994
Contig145287	ref|XP_011868100.1| PREDICTED: uncharacterized protein LOC105562140 isoform X2 [Vollenhovia emeryi]	0.252033	17.025	4.20596	4.04784	5.16921e-05	0.00381986
Contig47266	ref|XP_011878392.1| PREDICTED: uncharacterized protein LOC105567806 [Vollenhovia emeryi]	1.17369	17.0268	3.55431	4.79046	1.664e-06	0.000301432
Contig46834	#N/A	0.219825	17.0442	4.20208	4.05613	4.98932e-05	0.00370738
Contig109592	ref|XP_011686372.1| PREDICTED: intraflagellar transport protein 80 homolog [Wasmannia auropunctata]	0.222286	17.0457	4.20208	4.0565	4.98131e-05	0.0037064
Contig145225	#N/A	0.413649	17.047	4.20596	4.05307	5.055e-05	0.00374741
Contig98906	#N/A	0.572992	17.0519	4.20338	4.0567	4.9771e-05	0.00370521
Contig103981	#N/A	0.538196	17.0528	4.2042	4.05614	4.98907e-05	0.00370738
Contig64528	#N/A	0.657685	17.0551	4.19998	4.06076	4.89123e-05	0.00365564
Contig114389	#N/A	0.336685	17.0582	4.18728	4.07382	4.62487e-05	0.00349455
Contig140529	#N/A	0.256994	17.0599	4.19164	4.06998	4.7017e-05	0.00354502
Contig117061	#N/A	0.143239	17.0704	4.19957	4.06479	4.80748e-05	0.0036063
Contig45122	ref|XP_011708199.1| PREDICTED: WD repeat-containing protein 66-like [Wasmannia auropunctata]	0.290265	17.0917	4.2041	4.06548	4.79337e-05	0.00360002
Contig19580	ref|XP_012227922.1| PREDICTED: sodium-coupled monocarboxylate transporter 1 [Linepithema humile]	0.754288	17.0927	3.17277	5.38731	7.15207e-08	2.24072e-05
Contig95032	ref|XP_011687058.1| PREDICTED: dual specificity protein phosphatase 3-like [Wasmannia auropunctata]	0.884763	17.0933	4.19408	4.07558	4.59006e-05	0.00347568
Contig74986	#N/A	0.196027	17.098	4.19632	4.07452	4.61101e-05	0.00348781
Contig118689	#N/A	0.171978	17.1015	4.19269	4.07888	4.5254e-05	0.00344147
Contig70405	#N/A	0.215801	17.1016	4.20208	4.06978	4.70571e-05	0.00354614
Contig52956	ref|XP_011689525.1| PREDICTED: uncharacterized protein LOC105451031 [Wasmannia auropunctata]	0.173347	17.1034	4.1961	4.07602	4.58139e-05	0.00347097
Contig90474	ref|XP_011705250.1| PREDICTED: putative odorant receptor 71a, partial [Wasmannia auropunctata]	0.173347	17.1034	4.1961	4.07602	4.58139e-05	0.00347097
Contig91471	#N/A	0.173347	17.1034	4.1961	4.07602	4.58139e-05	0.00347097
Contig108727	ref|XP_011632422.1| PREDICTED: LOW QUALITY PROTEIN: uncharacterized protein LOC105424077 [Pogonomyrmex barbatus]	0.183292	17.1086	4.19214	4.08111	4.4822e-05	0.00341958
Contig128673	#N/A	0.141053	17.1094	4.19647	4.07709	4.56027e-05	0.0034624
Contig89796	#N/A	0.141053	17.1094	4.19647	4.07709	4.56027e-05	0.0034624
Contig73750	#N/A	4.26307	17.1109	2.24005	7.63865	2.19509e-14	1.67203e-10
Contig27608	#N/A	0.154111	17.1264	4.19793	4.07972	4.50893e-05	0.00343079
Contig104257	#N/A	0.159329	17.1418	4.19721	4.0841	4.42479e-05	0.00338317
Contig131179	#N/A	0.159329	17.1418	4.19721	4.0841	4.42479e-05	0.00338317
Contig19935	#N/A	0.159329	17.1418	4.19721	4.0841	4.42479e-05	0.00338317
Contig93182	ref|XP_011629804.1| PREDICTED: LOW QUALITY PROTEIN: glutamate--cysteine ligase catalytic subunit [Pogonomyrmex barbatus]	0.260949	17.1537	4.20208	4.0822	4.46116e-05	0.00340545
Contig74117	ref|XP_011696914.1| PREDICTED: ubiquinone biosynthesis monooxygenase COQ6 isoform X1 [Wasmannia auropunctata]	0.616301	17.1644	4.20596	4.08099	4.48451e-05	0.00341958
Contig84362	#N/A	0.248296	17.165	4.20208	4.08489	4.40974e-05	0.00337715
Contig81849	ref|XP_011170766.1| PREDICTED: mitochondrial inner membrane protein COX18 isoform X1 [Solenopsis invicta]	2.50706	17.1658	2.53617	6.76838	1.30231e-11	1.65778e-08
Contig101276	#N/A	0.591547	17.1682	3.89052	4.41284	1.02023e-05	0.00120834
Contig142842	ref|XP_012538806.1| PREDICTED: probable multidrug resistance-associated protein lethal(2)03659 [Monomorium pharaonis]	1.32315	17.1777	4.19227	4.09747	4.17684e-05	0.00323916
Contig29775	#N/A	0.218413	17.1794	4.19622	4.09401	4.23979e-05	0.00327898
Contig105519	ref|XP_011878428.1| PREDICTED: uncharacterized protein LOC105567830 [Vollenhovia emeryi]	0.702092	17.1814	4.18473	4.10573	4.03046e-05	0.00316277
Contig114733	#N/A	0.173535	17.1853	4.19531	4.09631	4.19795e-05	0.00325196
Contig86792	#N/A	0.292149	17.1922	4.20596	4.08758	4.35893e-05	0.00335103
Contig131407	#N/A	0.16137	17.1963	4.19282	4.10138	4.10698e-05	0.0032008
Contig48662	ref|XP_011861886.1| PREDICTED: uncharacterized protein LOC105558678 [Vollenhovia emeryi]	0.25679	17.1999	4.18725	4.10768	3.99658e-05	0.00314074
Contig107129	#N/A	0.236841	17.2011	4.18669	4.10852	3.98206e-05	0.00313107
Contig51624	ref|XP_011875497.1| PREDICTED: PC4 and SFRS1-interacting protein [Vollenhovia emeryi]	0.306016	17.2016	4.20208	4.09358	4.2476e-05	0.00328143
Contig125160	ref|XP_011692182.1| PREDICTED: uncharacterized protein LOC105452605 isoform X1 [Wasmannia auropunctata]	0.145282	17.2032	4.19775	4.0982	4.16371e-05	0.00323075
Contig127620	#N/A	0.145282	17.2032	4.19775	4.0982	4.16371e-05	0.00323075
Contig135270	#N/A	0.145282	17.2032	4.19775	4.0982	4.16371e-05	0.00323075
Contig52119	#N/A	0.201934	17.2064	4.18729	4.10919	3.97044e-05	0.00312541
Contig82902	ref|XP_011054731.1| PREDICTED: coiled-coil domain-containing protein 103-like [Acromyrmex echinatior]	0.218852	17.207	4.19102	4.10568	4.03133e-05	0.00316277
Contig65962	ref|XP_011863830.1| PREDICTED: UDP-glucuronosyltransferase 2B15-like [Vollenhovia emeryi]	0.800762	17.2108	4.19908	4.09871	4.15457e-05	0.00322898
Contig117006	#N/A	0.163013	17.2216	4.19596	4.10432	4.05506e-05	0.00317124
Contig15638	ref|XP_011877995.1| PREDICTED: glutamyl aminopeptidase-like isoform X3 [Vollenhovia emeryi]	1.23714	17.2229	4.20105	4.09967	4.13732e-05	0.00321911
Contig62533	#N/A	0.371632	17.2321	4.20596	4.09706	4.1843e-05	0.00324316
Contig44463	ref|XP_011302448.1| PREDICTED: lysine--tRNA ligase isoform X2 [Fopius arisanus]	0.304608	17.233	4.20207	4.10106	4.11257e-05	0.00320338
Contig119322	#N/A	0.233278	17.2334	4.19013	4.11286	3.90786e-05	0.00308474
Contig149197	#N/A	0.215804	17.2386	4.20069	4.10375	4.06503e-05	0.00317686
Contig100847	ref|XP_012536476.1| PREDICTED: probable cytochrome P450 12a5, mitochondrial [Monomorium pharaonis]	0.471086	17.2485	4.20208	4.10476	4.04735e-05	0.00317006
Contig107189	ref|XP_011877260.1| PREDICTED: LOW QUALITY PROTEIN: uncharacterized aarF domain-containing protein kinase 5 [Vollenhovia emeryi]	1.16512	17.2562	4.19088	4.11756	3.82912e-05	0.00304368
Contig149231	#N/A	0.16159	17.2577	4.19625	4.11265	3.91151e-05	0.0030859
Contig117391	#N/A	0.156443	17.2634	4.19303	4.11716	3.83578e-05	0.00304368
Contig131231	#N/A	0.156443	17.2634	4.19303	4.11716	3.83578e-05	0.00304368
Contig148703	#N/A	0.156443	17.2634	4.19303	4.11716	3.83578e-05	0.00304368
Contig139814	ref|XP_011630143.1| PREDICTED: spondin-1-like [Pogonomyrmex barbatus]	0.345346	17.2635	4.17681	4.13318	3.57785e-05	0.00290373
Contig82504	#N/A	0.385171	17.267	4.20596	4.10537	4.03676e-05	0.00316527
Contig131749	#N/A	0.218618	17.2695	4.20069	4.11111	3.9376e-05	0.00310302
Contig70521	#N/A	0.175589	17.2826	4.19623	4.1186	3.81181e-05	0.00303606
Contig81627	ref|XP_011056669.1| PREDICTED: protein krueppel-like isoform X2 [Acromyrmex echinatior]	0.175589	17.2826	4.19623	4.1186	3.81181e-05	0.00303606
Contig73393	#N/A	0.244426	17.285	4.20596	4.10965	3.96256e-05	0.00312095
Contig111563	#N/A	0.151389	17.2911	4.19405	4.12277	3.74346e-05	0.00299682
Contig110660	#N/A	0.220691	17.2954	4.18627	4.13146	3.6047e-05	0.00291882
Contig95634	#N/A	0.202619	17.2975	4.20069	4.11779	3.82531e-05	0.00304368
Contig33231	ref|XP_011858518.1| PREDICTED: uncharacterized protein LOC105556060 [Vollenhovia emeryi]	0.165119	17.3033	4.19659	4.12319	3.73668e-05	0.00299479
Contig54020	ref|XP_011053630.1| PREDICTED: CBL-interacting protein kinase 16-like isoform X1 [Acromyrmex echinatior]	0.165119	17.3033	4.19659	4.12319	3.73668e-05	0.00299479
Contig63287	#N/A	0.165119	17.3033	4.19659	4.12319	3.73668e-05	0.00299479
Contig77326	ref|XP_011168055.1| PREDICTED: uncharacterized protein LOC105201654 [Solenopsis invicta]	0.165119	17.3033	4.19659	4.12319	3.73668e-05	0.00299479
Contig103459	#N/A	0.150045	17.3086	4.19338	4.1276	3.66564e-05	0.0029575
Contig119364	#N/A	0.150045	17.3086	4.19338	4.1276	3.66564e-05	0.0029575
Contig132838	#N/A	0.150045	17.3086	4.19338	4.1276	3.66564e-05	0.0029575
Contig94154	#N/A	0.540957	17.3318	4.19438	4.13213	3.5941e-05	0.00291357
Contig115682	#N/A	0.29581	17.3449	4.19958	4.13016	3.62509e-05	0.00293364
Contig99937	ref|XP_017033456.1| PREDICTED: calmodulin isoform X2 [Drosophila kikkawai]	0.245257	17.3451	4.2	4.12978	3.63111e-05	0.00293684
Contig119688	ref|XP_012532458.1| PREDICTED: uncharacterized protein LOC105834482 [Monomorium pharaonis]	2.14937	17.3503	4.19819	4.13279	3.58379e-05	0.00290688
Contig20829	#N/A	0.403079	17.3581	4.20106	4.13183	3.5988e-05	0.00291571
Contig70657	ref|XP_011871467.1| PREDICTED: protein rhomboid isoform X2 [Vollenhovia emeryi]	4.626	17.3642	4.18437	4.14977	3.32812e-05	0.0027436
Contig119387	#N/A	0.303903	17.3644	4.18569	4.14852	3.34633e-05	0.002757
Contig9561	ref|XP_011695050.1| PREDICTED: sapecin-C [Wasmannia auropunctata]	4.25453	17.3681	4.15693	4.17812	2.93934e-05	0.00249741
Contig43863	#N/A	0.542161	17.3695	4.18496	4.15045	3.31821e-05	0.00273703
Contig10468	ref|XP_011697921.1| PREDICTED: ZZ-type zinc finger-containing protein 3 [Wasmannia auropunctata]	1.64411	17.3702	4.19887	4.13688	3.52059e-05	0.00286714
Contig56719	#N/A	0.549987	17.3742	4.17494	4.16154	3.16107e-05	0.002632
Contig115903	ref|XP_016842656.1| PREDICTED: uncharacterized protein LOC107981383 [Nasonia vitripennis]	0.233333	17.3761	4.18635	4.15065	3.31531e-05	0.00273691
Contig138277	ref|XP_011697501.1| PREDICTED: cGMP-specific 3',5'-cyclic phosphodiesterase-like isoform X2 [Wasmannia auropunctata]	2.29438	17.3784	4.1986	4.13909	3.48682e-05	0.00285114
Contig78583	#N/A	0.251961	17.3922	4.20208	4.13896	3.48884e-05	0.00285114
Contig113695	ref|XP_011697057.1| PREDICTED: eukaryotic translation initiation factor 2-alpha kinase isoform X1 [Wasmannia auropunctata]	0.251184	17.3938	4.18667	4.15457	3.25898e-05	0.00270237
Contig48852	#N/A	0.22433	17.3946	4.2	4.14158	3.4492e-05	0.00282856
Contig124754	#N/A	0.312855	17.4006	4.18665	4.15621	3.23575e-05	0.00268468
Contig80653	ref|XP_012147661.1| PREDICTED: WD repeat-containing protein 89 [Megachile rotundata]	0.230533	17.4069	4.20208	4.14245	3.43609e-05	0.00281947
Contig136027	ref|XP_014300712.1| PREDICTED: transmembrane GTPase Marf [Microplitis demolitor]	0.276149	17.4085	4.18727	4.15749	3.21764e-05	0.00267279
Contig93636	#N/A	0.219541	17.4125	4.19451	4.15126	3.30653e-05	0.00273218
Contig81827	ref|XP_015378351.1| PREDICTED: uncharacterized protein LOC107172574 [Diuraphis noxia]	0.660347	17.4153	4.20208	4.14444	3.40643e-05	0.00280162
Contig118934	ref|XP_011695198.1| PREDICTED: actin-related protein 5 [Wasmannia auropunctata]	0.194679	17.4277	4.18674	4.16259	3.14659e-05	0.00262311
Contig123518	#N/A	0.167205	17.4422	4.19636	4.15651	3.23148e-05	0.00268271
Contig114756	#N/A	0.230067	17.4471	4.18827	4.1657	3.10397e-05	0.00259515
Contig46541	#N/A	0.326948	17.4487	4.20208	4.15239	3.29023e-05	0.0027221
Contig148852	#N/A	0.337981	17.4499	4.20208	4.15268	3.28601e-05	0.00272159
Contig114466	#N/A	0.192757	17.4614	4.18585	4.17153	3.02565e-05	0.00255538
Contig94454	#N/A	0.284437	17.4642	4.18673	4.17132	3.02846e-05	0.00255623
Contig116285	ref|XP_012540770.1| PREDICTED: iron-sulfur cluster co-chaperone protein HscB, mitochondrial [Monomorium pharaonis]	1.4208	17.4712	4.19337	4.1664	3.09453e-05	0.00259242
Contig138013	#N/A	0.259929	17.4744	4.18881	4.17168	3.02362e-05	0.00255519
Contig120890	#N/A	0.201659	17.475	4.19382	4.16684	3.08847e-05	0.00259242
Contig30973	ref|XP_011881115.1| PREDICTED: sarcoplasmic calcium-binding protein 1 [Vollenhovia emeryi]	0.182993	17.4819	4.19611	4.16621	3.09702e-05	0.00259242
Contig60641	#N/A	0.182993	17.4819	4.19611	4.16621	3.09702e-05	0.00259242
Contig105432	ref|XP_011056523.1| PREDICTED: FAD synthase-like isoform X1 [Acromyrmex echinatior]	1.67143	17.4832	4.19813	4.16451	3.12022e-05	0.00260566
Contig67834	ref|XP_011562943.1| PREDICTED: protein lin-52 homolog [Plutella xylostella]	0.227212	17.4884	4.18827	4.17557	2.97238e-05	0.00251641
Contig2605	#N/A	0.246055	17.4954	4.18912	4.17639	2.96172e-05	0.00250889
Contig36498	#N/A	0.329105	17.496	4.20208	4.16365	3.13198e-05	0.00261393
Contig100051	#N/A	0.179208	17.5017	4.19692	4.17014	3.04414e-05	0.00256334
Contig105469	#N/A	0.179208	17.5017	4.19692	4.17014	3.04414e-05	0.00256334
Contig111218	#N/A	0.229515	17.5021	4.18672	4.18039	2.91013e-05	0.00248992
Contig102314	#N/A	0.151182	17.5201	4.19303	4.17838	2.93596e-05	0.00249741
Contig128628	#N/A	0.151182	17.5201	4.19303	4.17838	2.93596e-05	0.00249741
Contig146932	#N/A	0.151182	17.5201	4.19303	4.17838	2.93596e-05	0.00249741
Contig148679	#N/A	0.151182	17.5201	4.19303	4.17838	2.93596e-05	0.00249741
Contig47825	#N/A	0.202734	17.5305	4.19562	4.17828	2.93717e-05	0.00249741
Contig144944	#N/A	0.180082	17.535	4.19303	4.18195	2.89021e-05	0.00247802
Contig83037	ref|XP_011864300.1| PREDICTED: short-chain dehydrogenase/reductase family 16C member 6 isoform X1 [Vollenhovia emeryi]	0.188064	17.5484	4.19269	4.18547	2.84576e-05	0.00244734
Contig128497	#N/A	0.197193	17.5497	4.19282	4.18565	2.84354e-05	0.00244692
Contig133872	#N/A	0.189788	17.5594	4.19591	4.18488	2.8532e-05	0.00245075
Contig31907	ref|XP_012533822.1| PREDICTED: cytochrome P450 6A1-like isoform X2 [Monomorium pharaonis]	1.48291	17.5619	4.19857	4.18283	2.87906e-05	0.00246996
Contig32029	#N/A	0.270448	17.5669	4.18571	4.19687	2.70625e-05	0.0023488
Contig11735	#N/A	0.546169	17.5677	4.19057	4.1922	2.76257e-05	0.00239474
Contig115217	#N/A	0.210368	17.573	4.1943	4.18973	2.79286e-05	0.00241064
Contig96688	#N/A	0.433053	17.5749	4.19343	4.19107	2.77642e-05	0.0024038
Contig145744	#N/A	0.189297	17.5803	4.19518	4.19059	2.78226e-05	0.00240444
Contig21784	#N/A	0.280952	17.5821	4.18872	4.1975	2.69877e-05	0.00234687
Contig75734	#N/A	0.192929	17.5833	4.18834	4.19816	2.69091e-05	0.00234413
Contig45923	#N/A	0.183536	17.584	4.19621	4.19045	2.78397e-05	0.00240444
Contig65931	#N/A	0.183536	17.584	4.19621	4.19045	2.78397e-05	0.00240444
Contig131519	#N/A	0.214994	17.5844	4.19543	4.19132	2.77332e-05	0.00240258
Contig124367	#N/A	0.180013	17.5987	4.19269	4.19748	2.69904e-05	0.00234687
Contig138009	ref|XP_011867771.1| PREDICTED: LOW QUALITY PROTEIN: cationic amino acid transporter 3 [Vollenhovia emeryi]	0.180013	17.5987	4.19269	4.19748	2.69904e-05	0.00234687
Contig55199	ref|XP_011880381.1| PREDICTED: uncharacterized protein LOC105568915 [Vollenhovia emeryi]	0.591774	17.6138	4.19454	4.19922	2.6783e-05	0.00233504
Contig50792	ref|XP_011066374.1| PREDICTED: multidrug resistance-associated protein 4-like [Acromyrmex echinatior]	0.317408	17.6229	4.20069	4.19525	2.72572e-05	0.00236425
Contig133002	#N/A	0.214936	17.6265	4.18714	4.20967	2.55747e-05	0.00225148
Contig91964	ref|XP_011059726.1| PREDICTED: A-kinase anchor protein 9-like isoform X4 [Acromyrmex echinatior]	2.98277	17.6345	3.76917	4.67861	2.88827e-06	0.000466404
Contig124635	#N/A	0.153955	17.6367	4.19303	4.20621	2.59694e-05	0.00227789
Contig149716	ref|XP_012220362.1| PREDICTED: atrial natriuretic peptide receptor 1 isoform X3 [Linepithema humile]	0.609307	17.6451	4.18826	4.21299	2.52009e-05	0.00222721
Contig137103	ref|XP_015793822.1| PREDICTED: uncharacterized protein LOC107370338, partial [Tetranychus urticae]	0.285333	17.6461	4.18619	4.21531	2.49432e-05	0.00221861
Contig14627	#N/A	0.294712	17.6521	4.18721	4.21573	2.48976e-05	0.00221813
Contig91389	#N/A	0.303147	17.6563	4.19683	4.20707	2.58708e-05	0.00227226
Contig81574	#N/A	0.293374	17.6616	4.20596	4.19918	2.67882e-05	0.00233504
Contig121192	#N/A	0.893758	17.6643	3.05202	5.78773	7.13455e-09	3.61323e-06
Contig103333	#N/A	0.14201	17.6659	4.19337	4.21282	2.52202e-05	0.00222721
Contig112920	#N/A	0.14201	17.6659	4.19337	4.21282	2.52202e-05	0.00222721
Contig130585	#N/A	0.14201	17.6659	4.19337	4.21282	2.52202e-05	0.00222721
Contig133507	ref|XP_011866247.1| PREDICTED: transmembrane protein 26-like [Vollenhovia emeryi]	0.14201	17.6659	4.19337	4.21282	2.52202e-05	0.00222721
Contig135890	ref|XP_011049569.1| PREDICTED: uncharacterized protein LOC105143178 [Acromyrmex echinatior]	0.14201	17.6659	4.19337	4.21282	2.52202e-05	0.00222721
Contig148078	#N/A	0.14201	17.6659	4.19337	4.21282	2.52202e-05	0.00222721
Contig142729	#N/A	0.231798	17.6693	4.18913	4.21789	2.46596e-05	0.00220248
Contig141428	ref|XP_012234502.1| PREDICTED: uncharacterized protein LOC105679183 isoform X2 [Linepithema humile]	0.232186	17.6756	4.18521	4.22335	2.407e-05	0.00216439
Contig8705	ref|XP_011864104.1| PREDICTED: proton-coupled amino acid transporter 1-like isoform X1 [Vollenhovia emeryi]	2.31029	17.6761	4.19147	4.21715	2.47413e-05	0.00220838
Contig70545	ref|XP_015122715.1| PREDICTED: uncharacterized protein K02A2.6-like [Diachasma alloeum]	0.200644	17.6794	4.19576	4.21364	2.51291e-05	0.00222721
Contig103438	#N/A	0.214023	17.6797	4.18647	4.22306	2.4101e-05	0.00216439
Contig116891	#N/A	0.203762	17.6884	4.18667	4.22494	2.39002e-05	0.00215234
Contig18964	ref|XP_011632255.1| PREDICTED: LOW QUALITY PROTEIN: uncharacterized protein LOC105423947, partial [Pogonomyrmex barbatus]	0.594268	17.6934	3.87489	4.56618	4.967e-06	0.000720562
Contig99246	#N/A	0.248295	17.6957	4.18662	4.22672	2.37121e-05	0.00214086
Contig62534	#N/A	0.284406	17.7001	4.20203	4.21228	2.52806e-05	0.00222976
Contig58250	ref|XP_011861716.1| PREDICTED: synaptic vesicle 2-related protein isoform X2 [Vollenhovia emeryi]	1.77713	17.7013	4.16836	4.24659	2.1705e-05	0.00202166
Contig81583	#N/A	0.207351	17.7027	4.19513	4.21984	2.44481e-05	0.00218774
Contig129366	#N/A	0.458883	17.7149	4.2042	4.21363	2.51301e-05	0.00222721
Contig69342	ref|XP_011689307.1| PREDICTED: uncharacterized protein LOC105450900 [Wasmannia auropunctata]	0.549489	17.716	4.19492	4.22321	2.40848e-05	0.00216439
Contig57679	ref|XP_012539442.1| PREDICTED: uncharacterized protein LOC105838433 isoform X2 [Monomorium pharaonis]	0.466653	17.7174	4.19778	4.22067	2.43581e-05	0.00218245
Contig27928	ref|XP_011700767.1| PREDICTED: uncharacterized protein LOC105457668 [Wasmannia auropunctata]	0.192262	17.7217	4.19531	4.22416	2.39835e-05	0.00215847
Contig67188	ref|XP_016917701.1| PREDICTED: mitochondrial glutamate carrier 1-like [Apis cerana]	0.273797	17.7236	4.1828	4.23727	2.26256e-05	0.00207372
Contig34985	#N/A	0.454388	17.7236	4.20596	4.21394	2.50955e-05	0.00222721
Contig51657	#N/A	0.269875	17.7254	4.18519	4.23527	2.28277e-05	0.00208499
Contig124243	ref|XP_011879210.1| PREDICTED: argininosuccinate lyase [Vollenhovia emeryi]	0.993161	17.7293	4.19208	4.22923	2.34492e-05	0.00212255
Contig95054	#N/A	0.358271	17.7325	4.18852	4.2336	2.2998e-05	0.00209648
Contig132244	ref|XP_014759086.1| uncharacterized protein Dana_GF27150 [Drosophila ananassae]	0.555798	17.7332	4.18383	4.2385	2.25021e-05	0.00206766
Contig37534	#N/A	0.388857	17.7357	4.18837	4.23452	2.2904e-05	0.00208926
Contig130660	#N/A	0.274567	17.7377	4.18598	4.23741	2.26111e-05	0.00207372
Contig124631	#N/A	0.203453	17.7384	4.192	4.23148	2.32162e-05	0.00210792
Contig64517	#N/A	0.249089	17.7394	4.20069	4.22297	2.41105e-05	0.00216439
Contig71032	ref|XP_011859599.1| PREDICTED: uncharacterized protein LOC105557065 [Vollenhovia emeryi]	0.506475	17.7426	4.19948	4.22496	2.38988e-05	0.00215234
Contig133930	ref|XP_011881589.1| PREDICTED: 60S acidic ribosomal protein P2 [Vollenhovia emeryi]	0.360093	17.7556	4.18587	4.2418	2.21739e-05	0.00204827
Contig113535	ref|XP_011861606.1| PREDICTED: uncharacterized protein LOC105558506 [Vollenhovia emeryi]	2.56548	17.7562	4.19082	4.23692	2.26602e-05	0.00207372
Contig136952	#N/A	0.335839	17.7591	4.18588	4.24263	2.20917e-05	0.00204688
Contig45983	ref|XP_012539824.1| PREDICTED: dual specificity tyrosine-phosphorylation-regulated kinase 4 isoform X3 [Monomorium pharaonis]	0.414035	17.7597	4.18433	4.24433	2.19245e-05	0.00203673
Contig102567	#N/A	0.355679	17.7618	4.18566	4.24348	2.2008e-05	0.00204315
Contig138516	ref|XP_011700200.1| PREDICTED: hexosaminidase D-like isoform X1 [Wasmannia auropunctata]	2.84227	17.7656	3.61392	4.91586	8.83926e-07	0.000174925
Contig102912	ref|XP_011878979.1| PREDICTED: intraflagellar transport protein 88 homolog [Vollenhovia emeryi]	0.410078	17.771	4.18631	4.24503	2.18562e-05	0.00203173
Contig110870	#N/A	0.1734	17.7722	4.19235	4.23921	2.24311e-05	0.00206478
Contig60722	#N/A	0.240735	17.7778	4.20208	4.23072	2.32949e-05	0.00211034
Contig145172	#N/A	0.537823	17.788	4.19744	4.23781	2.2571e-05	0.00207227
Contig150075	ref|XP_011704647.1| PREDICTED: rab3 GTPase-activating protein non-catalytic subunit [Wasmannia auropunctata]	0.183923	17.7884	4.19235	4.24307	2.20483e-05	0.00204554
Contig88340	#N/A	0.19384	17.7962	4.19564	4.2416	2.21936e-05	0.00204827
Contig94342	#N/A	0.19384	17.7962	4.19564	4.2416	2.21936e-05	0.00204827
Contig99198	#N/A	0.19384	17.7962	4.19564	4.2416	2.21936e-05	0.00204827
Contig134482	#N/A	0.28699	17.8033	4.18952	4.24948	2.14266e-05	0.00200101
Contig68656	#N/A	0.201952	17.8121	4.19594	4.24509	2.1851e-05	0.00203173
Contig90275	#N/A	0.201952	17.8121	4.19594	4.24509	2.1851e-05	0.00203173
Contig50372	ref|XP_014221324.1| PREDICTED: uncharacterized protein LOC106648759 [Trichogramma pretiosum]	1.58954	17.8137	4.1913	4.25015	2.13631e-05	0.00199771
Contig95037	#N/A	2.60676	17.8196	3.81801	4.66725	3.05263e-06	0.00048988
Contig149304	#N/A	0.319254	17.8207	4.18568	4.25754	2.06692e-05	0.00194312
Contig31936	#N/A	0.268631	17.8238	4.20208	4.24166	2.21877e-05	0.00204827
Contig146454	#N/A	0.269783	17.8313	4.18633	4.2594	2.04975e-05	0.00193455
Contig31908	ref|XP_011704423.1| PREDICTED: probable cytochrome P450 6a14 [Wasmannia auropunctata]	1.76415	17.8459	4.19843	4.25062	2.13184e-05	0.00199485
Contig118373	ref|XP_012215186.1| PREDICTED: protein sprint isoform X1 [Linepithema humile]	0.205214	17.853	4.1918	4.25904	2.05307e-05	0.00193455
Contig53565	#N/A	0.203633	17.8544	4.19606	4.25504	2.09013e-05	0.00195841
Contig41813	ref|XP_011688124.1| PREDICTED: progestin and adipoQ receptor family member 4 [Wasmannia auropunctata]	1.47642	17.8559	4.19211	4.25942	2.04962e-05	0.00193455
Contig46456	#N/A	0.684901	17.8579	4.18418	4.26796	1.97273e-05	0.00188267
Contig131873	ref|XP_012059797.1| PREDICTED: LOW QUALITY PROTEIN: tubulin-specific chaperone C-like [Atta cephalotes]	0.273149	17.8619	4.18568	4.26738	1.9778e-05	0.00188567
Contig139619	#N/A	0.209176	17.8663	4.19503	4.25892	2.05414e-05	0.00193455
Contig124407	#N/A	0.269732	17.8712	4.18536	4.26992	1.95543e-05	0.00187702
Contig101653	#N/A	0.203766	17.8829	4.19474	4.26317	2.01545e-05	0.00191254
Contig20350	ref|XP_011057750.1| PREDICTED: putative adenosylhomocysteinase 2 isoform X3 [Acromyrmex echinatior]	1.8377	17.8833	4.03184	4.43552	9.18493e-06	0.00112534
Contig141821	#N/A	0.190069	17.8838	4.19229	4.26588	1.99115e-05	0.00189457
Contig61638	ref|XP_011049845.1| PREDICTED: ATP-dependent RNA helicase DHX36 isoform X2 [Acromyrmex echinatior]	3.33965	17.8887	4.19126	4.26809	1.97154e-05	0.00188267
Contig88024	#N/A	0.326714	17.8923	4.18522	4.27512	1.91037e-05	0.00184378
Contig113773	#N/A	0.202222	17.893	4.19235	4.26802	1.97216e-05	0.00188267
Contig101942	ref|XP_011871807.1| PREDICTED: uncharacterized protein LOC105564200 [Vollenhovia emeryi]	0.214167	17.8938	4.19201	4.26855	1.96746e-05	0.00188267
Contig51052	#N/A	0.214167	17.8938	4.19201	4.26855	1.96746e-05	0.00188267
Contig133777	#N/A	0.372472	17.8987	4.18514	4.27672	1.89669e-05	0.00183559
Contig100827	#N/A	0.283157	17.8997	4.18532	4.27679	1.89608e-05	0.00183559
Contig100933	#N/A	0.203644	17.9013	4.19201	4.27034	1.95173e-05	0.00187502
Contig139688	#N/A	0.169507	17.9025	4.19304	4.26958	1.95842e-05	0.00187861
Contig20223	#N/A	0.313309	17.9039	4.1817	4.28149	1.85643e-05	0.00180777
Contig122011	#N/A	0.252864	17.9053	4.18872	4.27465	1.91436e-05	0.00184511
Contig92229	ref|XP_012339113.1| PREDICTED: alpha-actinin, sarcomeric-like isoform X2 [Apis florea]	0.342042	17.9054	4.19537	4.26789	1.97331e-05	0.00188267
Contig144362	#N/A	0.272374	17.9059	4.18568	4.27791	1.88659e-05	0.00183084
Contig141327	ref|XP_011706959.1| PREDICTED: GTP-binding protein GEM-like [Wasmannia auropunctata]	0.353275	17.9082	4.20169	4.26214	2.02474e-05	0.00192007
Contig110791	ref|XP_012063362.1| PREDICTED: lymphocyte antigen 6D [Atta cephalotes]	0.395373	17.9087	4.18633	4.27791	1.88657e-05	0.00183084
Contig68663	#N/A	0.294566	17.9179	4.20208	4.26405	2.0075e-05	0.00190756
Contig61050	ref|XP_011689473.1| PREDICTED: probable helicase with zinc finger domain [Wasmannia auropunctata]	0.64399	17.9188	4.18485	4.28182	1.8537e-05	0.00180761
Contig72226	#N/A	0.358403	17.9232	4.1856	4.28211	1.85125e-05	0.00180651
Contig59639	ref|XP_011163813.1| PREDICTED: dynein intermediate chain 3, ciliary [Solenopsis invicta]	0.542172	17.9337	4.18413	4.28612	1.8182e-05	0.00178407
Contig134519	ref|XP_012060974.1| PREDICTED: chromatin modification-related protein MEAF6 [Atta cephalotes]	1.50327	17.9375	4.18209	4.28912	1.79383e-05	0.00176752
Contig135256	#N/A	0.45808	17.9481	4.1973	4.2761	1.90196e-05	0.00183888
Contig114141	ref|XP_011635727.1| PREDICTED: protein spinster isoform X1 [Pogonomyrmex barbatus]	0.376642	17.9516	4.18445	4.29007	1.78616e-05	0.00176119
Contig123068	#N/A	0.522894	17.9524	4.17708	4.29784	1.72468e-05	0.00171856
Contig100473	#N/A	0.177592	17.9528	4.19235	4.28227	1.84998e-05	0.00180651
Contig99810	#N/A	0.177592	17.9528	4.19235	4.28227	1.84998e-05	0.00180651
Contig124872	ref|XP_011869364.1| PREDICTED: post-GPI attachment to proteins factor 3 isoform X2 [Vollenhovia emeryi]	0.164307	17.968	4.19282	4.28543	1.82388e-05	0.00178593
Contig149669	ref|XP_011164921.1| PREDICTED: putative nuclease HARBI1 [Solenopsis invicta]	0.164307	17.968	4.19282	4.28543	1.82388e-05	0.00178593
Contig99477	#N/A	0.269408	17.9704	4.18389	4.29514	1.74581e-05	0.00173384
Contig59432	#N/A	0.21406	17.9738	4.19836	4.28114	1.85938e-05	0.0018094
Contig108122	#N/A	0.319274	17.9752	4.17977	4.30051	1.70402e-05	0.00170399
Contig117575	ref|XP_012058965.1| PREDICTED: leukotriene A-4 hydrolase [Atta cephalotes]	0.350569	17.9778	4.18421	4.29657	1.73461e-05	0.00172602
Contig145082	ref|XP_011703069.1| PREDICTED: LOW QUALITY PROTEIN: Bardet-Biedl syndrome 5 protein homolog [Wasmannia auropunctata]	0.815344	17.9841	4.19969	4.28224	1.85023e-05	0.00180651
Contig131295	#N/A	0.320578	17.9856	4.18272	4.29997	1.70821e-05	0.00170641
Contig114432	#N/A	0.334368	17.9929	4.18354	4.30087	1.70129e-05	0.00170367
Contig45012	#N/A	0.257328	18.0038	4.19235	4.29443	1.75141e-05	0.00173662
Contig38305	ref|XP_012063880.1| PREDICTED: LOW QUALITY PROTEIN: gem-associated protein 5 [Atta cephalotes]	30.7904	18.0078	4.19038	4.29741	1.72808e-05	0.00172073
Contig144178	#N/A	0.285437	18.0078	4.18515	4.30279	1.68658e-05	0.00169494
Contig54050	#N/A	0.267477	18.014	4.20208	4.28693	1.81161e-05	0.00178067
Contig27272	#N/A	0.348315	18.0152	4.18659	4.30307	1.68446e-05	0.00169494
Contig39001	ref|XP_011860494.1| PREDICTED: uncharacterized protein LOC105557774 [Vollenhovia emeryi]	2.46904	18.0185	4.19108	4.29925	1.71377e-05	0.0017101
Contig116652	#N/A	0.242834	18.027	4.19174	4.30061	1.70332e-05	0.00170399
Contig143045	#N/A	0.231328	18.0287	4.19371	4.29897	1.71591e-05	0.00171103
Contig100114	#N/A	1.42007	18.0359	2.6566	6.78911	1.12829e-11	1.4626e-08
Contig107437	ref|XP_011860942.1| PREDICTED: exonuclease 1 isoform X2 [Vollenhovia emeryi]	0.465189	18.0386	4.18412	4.31119	1.62378e-05	0.00164942
Contig28650	ref|XP_011053933.1| PREDICTED: uncharacterized protein LOC105145810 isoform X1 [Acromyrmex echinatior]	0.294463	18.0531	4.18446	4.31432	1.60097e-05	0.0016349
Contig133683	#N/A	0.169369	18.0558	4.19303	4.30615	1.6612e-05	0.00167539
Contig141216	#N/A	0.169369	18.0558	4.19303	4.30615	1.6612e-05	0.00167539
Contig144065	ref|XP_011865072.1| PREDICTED: uncharacterized protein LOC105560510 isoform X1 [Vollenhovia emeryi]	0.169369	18.0558	4.19303	4.30615	1.6612e-05	0.00167539
Contig25457	#N/A	0.67482	18.0585	4.18991	4.31001	1.63246e-05	0.00165705
Contig103545	ref|XP_011633602.1| PREDICTED: zinc finger protein 239-like [Pogonomyrmex barbatus]	0.3739	18.0609	4.18635	4.31424	1.60152e-05	0.0016349
Contig149604	ref|XP_012528534.1| PREDICTED: ubiquitin-like modifier-activating enzyme 5 isoform X2 [Monomorium pharaonis]	0.207696	18.0639	4.19269	4.30842	1.64426e-05	0.00166664
Contig65989	ref|XP_011686206.1| PREDICTED: sodium-independent sulfate anion transporter-like [Wasmannia auropunctata]	1.88218	18.0846	4.19183	4.31424	1.60154e-05	0.0016349
Contig53500	ref|XP_012531132.1| PREDICTED: interleukin enhancer-binding factor 2 homolog [Monomorium pharaonis]	0.185311	18.0875	4.19303	4.31372	1.60529e-05	0.00163588
Contig103155	ref|XP_011883558.1| PREDICTED: uncharacterized protein K02A2.6-like [Vollenhovia emeryi]	0.203368	18.0923	4.192	4.31591	1.5895e-05	0.00162865
Contig143371	#N/A	0.213984	18.0982	4.19159	4.31774	1.57636e-05	0.00161871
Contig149190	ref|XP_011696169.1| PREDICTED: leukotriene A-4 hydrolase [Wasmannia auropunctata]	0.22958	18.1036	4.19201	4.31859	1.5703e-05	0.00161532
Contig142962	#N/A	0.786556	18.1134	3.68671	4.91316	8.96217e-07	0.000176369
Contig144262	#N/A	0.317169	18.1136	4.2	4.31276	1.61229e-05	0.00163946
Contig50435	#N/A	0.245494	18.1147	4.19367	4.31953	1.56362e-05	0.00161451
Contig125232	#N/A	0.224242	18.1174	4.1918	4.3221	1.54553e-05	0.00159984
Contig106771	ref|XP_011881556.1| PREDICTED: protein ovo isoform X1 [Vollenhovia emeryi]	0.864603	18.1267	4.19423	4.32182	1.54748e-05	0.00160069
Contig60361	#N/A	0.276414	18.1282	4.20208	4.3141	1.60254e-05	0.0016349
Contig80400	ref|XP_011687748.1| PREDICTED: O-glucosyltransferase rumi homolog isoform X1 [Wasmannia auropunctata]	3.02355	18.1362	4.1993	4.31886	1.56839e-05	0.00161523
Contig105033	ref|XP_011057618.1| PREDICTED: nuclear pore complex protein Nup155 isoform X1 [Acromyrmex echinatior]	0.252546	18.1386	4.18672	4.3324	1.47491e-05	0.0015506
Contig85128	#N/A	0.29827	18.1415	4.20208	4.31727	1.57974e-05	0.00162101
Contig95397	#N/A	0.416251	18.1449	4.18557	4.33511	1.45688e-05	0.00153736
Contig100644	ref|XP_014482026.1| PREDICTED: protein msta, isoform B [Dinoponera quadriceps]	0.335464	18.1453	4.20208	4.31818	1.57322e-05	0.00161666
Contig133859	#N/A	0.228706	18.1527	4.1945	4.32773	1.50651e-05	0.00156952
Contig125961	#N/A	0.201945	18.1553	4.19234	4.33059	1.48713e-05	0.00155996
Contig138426	ref|XP_011687010.1| PREDICTED: uncharacterized protein LOC105449455 [Wasmannia auropunctata]	0.288475	18.1574	4.18725	4.33636	1.4486e-05	0.00153206
Contig2196	#N/A	3.20075	18.1606	3.66716	4.95223	7.33684e-07	0.000150025
Contig56574	#N/A	0.283563	18.1619	4.20069	4.32354	1.53543e-05	0.00159289
Contig25802	ref|XP_011873945.1| PREDICTED: chymotrypsin-1-like [Vollenhovia emeryi]	5.70522	18.1653	4.20596	4.31895	1.56772e-05	0.00161523
Contig106295	#N/A	0.363858	18.1814	4.18825	4.34104	1.4181e-05	0.00150657
Contig129587	#N/A	0.307247	18.1859	4.2	4.32997	1.4913e-05	0.00156285
Contig122550	#N/A	0.402608	18.1886	4.18509	4.34606	1.38608e-05	0.0014837
Contig71794	#N/A	0.446341	18.1895	4.1813	4.35019	1.36017e-05	0.00146543
Contig115897	#N/A	0.219264	18.2034	4.19433	4.34	1.4248e-05	0.00151028
Contig134555	#N/A	0.221644	18.2084	4.19201	4.34359	1.40171e-05	0.00149591
Contig38090	ref|XP_011170571.1| PREDICTED: uncharacterized protein LOC105203472, partial [Solenopsis invicta]	0.202948	18.2101	4.19269	4.34329	1.40362e-05	0.00149681
Contig102673	#N/A	0.185181	18.2156	4.19269	4.3446	1.39527e-05	0.00149015
Contig125903	ref|XP_012541300.1| PREDICTED: uncharacterized protein LOC105839499 [Monomorium pharaonis]	0.596406	18.2156	4.20208	4.33491	1.45819e-05	0.0015376
Contig95478	#N/A	0.312609	18.2174	4.20209	4.33532	1.45548e-05	0.00153703
Contig42675	ref|XP_012538354.1| PREDICTED: THAP domain-containing protein 1 A-like [Monomorium pharaonis]	1.18705	18.2175	4.16832	4.37046	1.23983e-05	0.0013825
Contig121857	#N/A	0.212461	18.2268	4.19214	4.34786	1.37475e-05	0.00147691
Contig16784	ref|XP_015124375.1| PREDICTED: uncharacterized protein LOC107046295 [Diachasma alloeum]	0.989525	18.2289	4.18606	4.35467	1.33268e-05	0.00144849
Contig140797	ref|XP_011646024.1| PREDICTED: LOW QUALITY PROTEIN: trafficking protein particle complex subunit 11 [Pogonomyrmex barbatus]	0.34044	18.2325	4.18515	4.35648	1.32169e-05	0.00144432
Contig130457	#N/A	0.322605	18.2371	4.18662	4.35603	1.3244e-05	0.00144497
Contig106401	#N/A	0.224082	18.2406	4.19096	4.35238	1.34667e-05	0.00145781
Contig103254	ref|XP_012534025.1| PREDICTED: growth arrest-specific protein 8 [Monomorium pharaonis]	0.231201	18.2442	4.19234	4.3518	1.35024e-05	0.00145781
Contig49832	ref|XP_011684806.1| PREDICTED: anoctamin-4 [Wasmannia auropunctata]	0.422489	18.2517	4.18493	4.3613	1.29293e-05	0.0014228
Contig120306	#N/A	0.253051	18.2531	4.19428	4.35191	1.34956e-05	0.00145781
Contig139812	#N/A	0.169547	18.2547	4.19282	4.3538	1.33798e-05	0.00145202
Contig2848	ref|XP_011706366.1| PREDICTED: uncharacterized protein LOC105461562 [Wasmannia auropunctata]	1.75537	18.2606	4.18328	4.36514	1.27043e-05	0.00140351
Contig65953	#N/A	0.259523	18.2617	4.20069	4.3473	1.37826e-05	0.00147869
Contig43974	#N/A	0.313625	18.265	4.19341	4.35564	1.32681e-05	0.00144497
Contig77032	ref|XP_011883698.1| PREDICTED: Golgi reassembly-stacking protein 2 [Vollenhovia emeryi]	4.07376	18.267	3.88291	4.70447	2.54528e-06	0.000423107
Contig136019	ref|XP_012526392.1| PREDICTED: cubilin isoform X2 [Monomorium pharaonis]	0.737562	18.2737	4.18361	4.36794	1.25425e-05	0.00139216
Contig149470	#N/A	0.213805	18.2774	4.1918	4.36028	1.29898e-05	0.00142835
Contig60886	#N/A	0.189615	18.278	4.19337	4.35879	1.30786e-05	0.00143253
Contig94488	#N/A	0.189615	18.278	4.19337	4.35879	1.30786e-05	0.00143253
Contig26659	#N/A	0.311773	18.2786	4.18312	4.36961	1.24467e-05	0.00138587
Contig44943	ref|XP_975095.1| PREDICTED: mitochondrial 2-oxoglutarate/malate carrier protein [Tribolium castaneum]	0.527191	18.2864	4.20208	4.35175	1.35054e-05	0.00145781
Contig127259	ref|XP_011059565.1| PREDICTED: slowpoke-binding protein isoform X2 [Acromyrmex echinatior]	0.561002	18.2886	4.18397	4.37112	1.23611e-05	0.00138179
Contig42464	#N/A	0.215624	18.2912	4.19283	4.36249	1.28589e-05	0.00141726
Contig148737	ref|XP_011166816.1| PREDICTED: tetratricopeptide repeat protein 5-like [Solenopsis invicta]	2.73929	18.2952	4.17954	4.37732	1.20146e-05	0.00135702
Contig139899	ref|XP_011865370.1| PREDICTED: 1-phosphatidylinositol 4,5-bisphosphate phosphodiesterase gamma-1 isoform X3 [Vollenhovia emeryi]	0.539468	18.3016	4.19436	4.36338	1.28068e-05	0.00141261
Contig90397	ref|XP_011878453.1| PREDICTED: uncharacterized protein LOC105567848 isoform X1 [Vollenhovia emeryi]	0.383139	18.3023	4.20208	4.35554	1.3274e-05	0.00144497
Contig12650	ref|XP_011690198.1| PREDICTED: protein EFR3 homolog cmp44E [Wasmannia auropunctata]	4.73238	18.3056	3.47876	5.26211	1.42411e-07	3.85686e-05
Contig75156	ref|XP_011695401.1| PREDICTED: homeobox protein rough [Wasmannia auropunctata]	0.547954	18.3102	4.19558	4.36416	1.27611e-05	0.00140868
Contig67754	#N/A	0.319932	18.3174	4.20205	4.35916	1.30562e-05	0.00143253
Contig20172	ref|XP_011695131.1| PREDICTED: bipolar kinesin KRP-130-like [Wasmannia auropunctata]	1.79759	18.3176	4.19272	4.3689	1.24873e-05	0.00138821
Contig49908	ref|XP_011697267.1| PREDICTED: uncharacterized protein CG7065-like [Wasmannia auropunctata]	0.25719	18.3216	4.18871	4.37405	1.21964e-05	0.00137098
Contig128494	#N/A	0.52425	18.3288	4.18408	4.38062	1.18344e-05	0.0013431
Contig112806	#N/A	0.251681	18.3308	4.19166	4.37316	1.22461e-05	0.00137258
Contig57847	ref|XP_015588059.1| PREDICTED: knirps-related protein-like isoform X1 [Cephus cinctus]	4.48939	18.3313	3.72844	4.91661	8.80561e-07	0.000174748
Contig130780	#N/A	0.249151	18.3313	4.19409	4.37074	1.23827e-05	0.00138246
Contig133015	#N/A	0.305297	18.3346	4.2	4.36537	1.26906e-05	0.00140309
Contig103021	#N/A	0.231241	18.3433	4.1857	4.38237	1.17393e-05	0.00133445
Contig47415	ref|XP_011876905.1| PREDICTED: coiled-coil domain-containing protein 132 [Vollenhovia emeryi]	0.84431	18.3454	4.18579	4.38277	1.17178e-05	0.00133445
Contig46599	#N/A	0.249458	18.3634	4.18942	4.38327	1.16909e-05	0.00133324
Contig30076	#N/A	5.02934	18.3653	4.20596	4.36649	1.26258e-05	0.00139858
Contig120457	ref|XP_011704965.1| PREDICTED: LOW QUALITY PROTEIN: cardioacceleratory peptide receptor, partial [Wasmannia auropunctata]	0.323096	18.3669	4.18509	4.38865	1.14055e-05	0.00131383
Contig62835	ref|XP_011701836.1| PREDICTED: chymotrypsin-1-like [Wasmannia auropunctata]	0.667687	18.3825	4.18364	4.39391	1.11332e-05	0.0012873
Contig109585	ref|XP_011629509.1| PREDICTED: N(G),N(G)-dimethylarginine dimethylaminohydrolase 1 isoform X1 [Pogonomyrmex barbatus]	0.215278	18.398	4.19282	4.38798	1.14409e-05	0.00131481
Contig134827	ref|XP_011870975.1| PREDICTED: histone acetyltransferase KAT2A-like [Vollenhovia emeryi]	6.99264	18.3993	3.67502	5.00657	5.54081e-07	0.000118084
Contig103116	#N/A	0.196727	18.4006	4.19282	4.38859	1.14091e-05	0.00131383
Contig61753	#N/A	0.274765	18.4031	4.20596	4.37548	1.21164e-05	0.00136359
Contig32430	#N/A	0.445539	18.4031	4.1979	4.38389	1.1658e-05	0.00133271
Contig95346	#N/A	0.307322	18.4096	4.20208	4.38107	1.18098e-05	0.00134139
Contig65690	#N/A	0.289276	18.4246	4.20069	4.38608	1.15412e-05	0.00132365
Contig63396	ref|XP_011159238.1| PREDICTED: arf-GAP with SH3 domain, ANK repeat and PH domain-containing protein 2 isoform X2 [Solenopsis invicta]	0.302084	18.4289	4.19559	4.39243	1.1209e-05	0.00129327
Contig109017	ref|XP_011862155.1| PREDICTED: dynein heavy chain 2, axonemal [Vollenhovia emeryi]	0.646443	18.4412	4.18517	4.40631	1.05144e-05	0.00124011
Contig71003	ref|XP_011051107.1| PREDICTED: uncharacterized protein LOC105144108 [Acromyrmex echinatior]	0.842876	18.4442	4.17749	4.41514	1.00944e-05	0.00120262
Contig67500	#N/A	0.275617	18.4469	4.19537	4.39697	1.09772e-05	0.00127448
Contig79275	#N/A	0.275617	18.4469	4.19537	4.39697	1.09772e-05	0.00127448
Contig106450	#N/A	0.231913	18.4554	4.19214	4.40239	1.07065e-05	0.00125856
Contig125395	#N/A	0.231913	18.4554	4.19214	4.40239	1.07065e-05	0.00125856
Contig45609	ref|XP_011706366.1| PREDICTED: uncharacterized protein LOC105461562 [Wasmannia auropunctata]	2.33141	18.4684	4.18293	4.41518	1.00925e-05	0.00120262
Contig138074	ref|XP_011861727.1| PREDICTED: uncharacterized protein LOC105558579 [Vollenhovia emeryi]	1.67332	18.4745	4.18469	4.41479	1.01109e-05	0.00120358
Contig78431	ref|XP_011866471.1| PREDICTED: probable maleylacetoacetate isomerase 2 [Vollenhovia emeryi]	0.256287	18.4748	4.19083	4.40838	1.04145e-05	0.00122953
Contig68627	ref|XP_011688622.1| PREDICTED: uncharacterized protein LOC105450468 [Wasmannia auropunctata]	0.252969	18.4839	4.2	4.40094	1.07785e-05	0.00126103
Contig53459	ref|XP_011687947.1| PREDICTED: malate dehydrogenase, cytoplasmic [Wasmannia auropunctata]	1.15025	18.4894	4.20208	4.40006	1.08221e-05	0.00126375
Contig132139	#N/A	0.470883	18.4901	4.17314	4.43074	9.39119e-06	0.00114589
Contig123110	ref|XP_011861118.1| PREDICTED: uncharacterized protein LOC105558172 [Vollenhovia emeryi]	3.49751	18.4935	3.53243	5.23534	1.64682e-07	4.30113e-05
Contig43058	#N/A	0.266996	18.4968	4.18833	4.41626	1.00421e-05	0.00120007
Contig143099	#N/A	0.23468	18.4986	4.19166	4.41318	1.01862e-05	0.00120744
Contig137364	ref|XP_011879589.1| PREDICTED: vacuolar protein sorting-associated protein 35 isoform X1 [Vollenhovia emeryi]	2.0563	18.502	3.85662	4.79746	1.60693e-06	0.000293732
Contig47940	#N/A	0.247628	18.5029	4.18915	4.41685	1.00148e-05	0.0011992
Contig123853	ref|XP_011696082.1| PREDICTED: annexin B9-like isoform X2 [Wasmannia auropunctata]	0.292086	18.5051	4.20069	4.40524	1.05666e-05	0.00124522
Contig46927	#N/A	1.20538	18.5093	3.03116	6.10634	1e-09	7.42488e-07
Contig39951	ref|XP_011860711.1| PREDICTED: ralA-binding protein 1 [Vollenhovia emeryi]	2.54624	18.5116	4.191	4.417	1.00081e-05	0.0011992
Contig66956	ref|XP_011878002.1| PREDICTED: uncharacterized protein LOC105567617 [Vollenhovia emeryi]	50.1153	18.5117	2.29818	8.05494	7.95163e-16	9.59687e-12
Contig140988	ref|XP_011646670.1| PREDICTED: mushroom body large-type Kenyon cell-specific protein 1-like [Pogonomyrmex barbatus]	0.423112	18.5125	4.18387	4.42474	9.656e-06	0.00116911
Contig41292	#N/A	0.7494	18.5148	4.19248	4.41618	1.00461e-05	0.00120007
Contig124925	#N/A	0.5243	18.5184	4.18911	4.42059	9.84305e-06	0.00118265
Contig28869	ref|XP_015523501.1| PREDICTED: uncharacterized protein LOC107227008 [Neodiprion lecontei]	2.72027	18.5215	3.6719	5.04411	4.55628e-07	0.000100435
Contig58408	ref|XP_011872993.1| PREDICTED: uncharacterized protein LOC105564867 [Vollenhovia emeryi]	0.359956	18.5401	4.19136	4.42341	9.71558e-06	0.00117432
Contig141690	#N/A	0.221437	18.5455	4.192	4.42401	9.68842e-06	0.00117204
Contig127891	#N/A	0.693558	18.55	3.88934	4.76944	1.84739e-06	0.000329584
Contig137664	ref|XP_012057068.1| PREDICTED: outer dense fiber protein 3-like [Atta cephalotes]	0.487117	18.5514	4.1812	4.43686	9.12791e-06	0.00112249
Contig63743	#N/A	22.9877	18.5611	4.19099	4.42881	9.47549e-06	0.0011522
Contig16058	ref|XP_011880976.1| PREDICTED: uncharacterized protein LOC105569261 isoform X2 [Vollenhovia emeryi]	0.210058	18.567	4.19618	4.42474	9.65574e-06	0.00116911
Contig95293	ref|XP_012063773.1| PREDICTED: TNF receptor-associated factor 4 [Atta cephalotes]	2.44613	18.5758	3.33465	5.57055	2.53939e-08	9.83038e-06
Contig51662	ref|XP_011068685.1| PREDICTED: uncharacterized protein LOC105154694 [Acromyrmex echinatior]	0.312449	18.5823	4.19546	4.42914	9.46116e-06	0.00115145
Contig72899	#N/A	0.312449	18.5823	4.19546	4.42914	9.46116e-06	0.00115145
Contig144369	ref|XP_011701378.1| PREDICTED: alpha-tocopherol transfer protein-like isoform X4 [Wasmannia auropunctata]	0.335491	18.5837	4.20207	4.42251	9.756e-06	0.00117496
Contig271	#N/A	0.335491	18.5837	4.20207	4.42251	9.756e-06	0.00117496
Contig139399	ref|XP_011058994.1| PREDICTED: methyltransferase-like protein 4 [Acromyrmex echinatior]	1.74109	18.5848	4.17616	4.45021	8.5787e-06	0.0010746
Contig45374	#N/A	0.302909	18.5855	4.20208	4.42294	9.73649e-06	0.00117484
Contig14797	ref|XP_012248349.1| PREDICTED: uncharacterized protein LOC100745157 [Bombus impatiens]	1.04669	18.5951	4.18397	4.44437	8.815e-06	0.00108971
Contig120687	#N/A	0.228196	18.5981	4.19191	4.43667	9.13626e-06	0.00112254
Contig132331	ref|XP_012530338.1| PREDICTED: loss of heterozygosity 12 chromosomal region 1 protein homolog [Monomorium pharaonis]	1.26972	18.6078	4.19905	4.43144	9.36066e-06	0.00114415
Contig81357	#N/A	0.274963	18.613	4.20208	4.42946	9.44677e-06	0.00115145
Contig132593	ref|XP_011701495.1| PREDICTED: uncharacterized protein LOC105458122 [Wasmannia auropunctata]	0.259271	18.617	4.1918	4.44128	8.94239e-06	0.00110256
Contig118026	#N/A	0.321032	18.6246	4.18775	4.44741	8.691e-06	0.001081
Contig109118	ref|XP_011882433.1| PREDICTED: uncharacterized protein LOC105570082, partial [Vollenhovia emeryi]	0.264793	18.6315	4.18301	4.45409	8.425e-06	0.00106574
Contig100429	ref|XP_011872040.1| PREDICTED: uncharacterized protein LOC105564342 [Vollenhovia emeryi]	4.93334	18.6315	4.18574	4.45119	8.53956e-06	0.00107159
Contig103321	#N/A	0.256662	18.6319	4.1918	4.44485	8.79526e-06	0.00108883
Contig51675	ref|XP_011684644.1| PREDICTED: tetratricopeptide repeat protein 39B-like [Wasmannia auropunctata]	2.24342	18.6333	4.1684	4.47013	7.81718e-06	0.00100659
Contig95640	#N/A	0.278572	18.6384	4.18967	4.44866	8.64066e-06	0.00107758
Contig144907	ref|XP_011865507.1| PREDICTED: leucine-rich repeat-containing protein 48-like [Vollenhovia emeryi]	0.23381	18.6494	4.19156	4.44926	8.61656e-06	0.00107648
Contig95493	ref|XP_012542162.1| PREDICTED: transcription elongation factor SPT4 [Monomorium pharaonis]	0.210118	18.6513	4.19283	4.44837	8.6523e-06	0.00107808
Contig102984	ref|XP_011874599.1| PREDICTED: protein timeless homolog isoform X2 [Vollenhovia emeryi]	0.976516	18.6653	4.18325	4.46191	8.12323e-06	0.00103591
Contig123696	ref|XP_011165431.1| PREDICTED: putative fatty acyl-CoA reductase CG5065 [Solenopsis invicta]	0.313785	18.6666	4.1916	4.45334	8.45442e-06	0.00106769
Contig65647	#N/A	0.235847	18.6726	4.18946	4.45705	8.30956e-06	0.00105491
Contig53432	#N/A	1.34582	18.6752	4.18314	4.46441	8.029e-06	0.00102668
Contig86752	#N/A	0.286927	18.678	4.20208	4.44494	8.79166e-06	0.00108883
Contig132486	ref|XP_012532616.1| PREDICTED: uncharacterized protein LOC105834579 isoform X2 [Monomorium pharaonis]	3.26728	18.6832	4.18299	4.46647	7.95217e-06	0.00102054
Contig132776	ref|XP_011872717.1| PREDICTED: uncharacterized protein LOC105564717 [Vollenhovia emeryi]	0.721673	18.6895	4.17774	4.47358	7.6919e-06	0.000995277
Contig44321	#N/A	0.377102	18.6988	4.18225	4.47099	7.78591e-06	0.0010056
Contig54721	#N/A	0.215054	18.7014	4.20208	4.45051	8.56672e-06	0.00107405
Contig66812	#N/A	0.327623	18.706	4.20208	4.45161	8.52291e-06	0.00107045
Contig67365	#N/A	0.327623	18.706	4.20208	4.45161	8.52291e-06	0.00107045
Contig102104	#N/A	0.472867	18.7069	4.20409	4.44969	8.59948e-06	0.00107624
Contig85883	ref|XP_012059196.1| PREDICTED: translocating chain-associated membrane protein 1 [Atta cephalotes]	0.306724	18.7169	4.18516	4.47221	7.7415e-06	0.00100078
Contig93221	#N/A	0.224118	18.7337	4.18287	4.47867	7.51088e-06	0.000975365
Contig97563	#N/A	0.531634	18.7533	4.19532	4.47005	7.82e-06	0.00100659
Contig132785	#N/A	0.249712	18.7552	4.2	4.46553	7.98723e-06	0.00102318
Contig90970	#N/A	0.346445	18.7801	4.19046	4.48164	7.40724e-06	0.000966409
Contig120741	#N/A	0.452746	18.7828	4.17922	4.49432	6.97935e-06	0.000925973
Contig146303	#N/A	0.299078	18.7921	4.19303	4.48176	7.403e-06	0.000966409
Contig123332	ref|XP_011159479.1| PREDICTED: D-beta-hydroxybutyrate dehydrogenase, mitochondrial [Solenopsis invicta]	0.258019	18.7972	4.2	4.47553	7.62224e-06	0.000987647
Contig100132	ref|XP_011866826.1| PREDICTED: uncharacterized protein LOC105561445 isoform X1 [Vollenhovia emeryi]	0.61774	18.7988	4.19116	4.48534	7.27961e-06	0.000954162
Contig85183	#N/A	0.385224	18.7999	4.20069	4.47543	7.62594e-06	0.000987647
Contig74034	ref|XP_011858704.1| PREDICTED: uncharacterized protein LOC105556230, partial [Vollenhovia emeryi]	0.19115	18.8115	4.18736	4.49246	7.04047e-06	0.000932331
Contig93400	ref|XP_012147785.1| PREDICTED: uncharacterized protein LOC105663456 [Megachile rotundata]	0.305467	18.8158	4.1863	4.49463	6.96917e-06	0.000925491
Contig9599	#N/A	0.342367	18.8185	4.19955	4.48109	7.42639e-06	0.000967604
Contig118530	ref|XP_011870563.1| PREDICTED: DNA polymerase epsilon subunit 2 [Vollenhovia emeryi]	0.33963	18.8243	4.19171	4.49083	7.09452e-06	0.000937731
Contig130930	#N/A	0.28636	18.8328	4.19846	4.48566	7.26893e-06	0.000953647
Contig69282	ref|XP_012540538.1| PREDICTED: metabotropic glutamate receptor 8-like isoform X1 [Monomorium pharaonis]	0.263365	18.8336	4.20069	4.48345	7.34475e-06	0.000960917
Contig16225	#N/A	0.583312	18.8394	4.17874	4.50839	6.53229e-06	0.000878575
Contig35114	ref|XP_011870342.1| PREDICTED: latrophilin Cirl-like isoform X2 [Vollenhovia emeryi]	1.59253	18.8656	3.56752	5.28816	1.23551e-07	3.44494e-05
Contig24610	#N/A	0.553207	18.8707	4.18028	4.51421	6.35527e-06	0.000864274
Contig140243	ref|XP_011859456.1| PREDICTED: uncharacterized protein LOC105556950 [Vollenhovia emeryi]	0.227214	18.8757	4.18425	4.51114	6.448e-06	0.000871667
Contig104801	#N/A	0.547821	18.8831	4.20596	4.48962	7.13509e-06	0.000942212
Contig119915	ref|XP_011170369.1| PREDICTED: uncharacterized protein LOC105203292 [Solenopsis invicta]	0.724073	18.8844	4.18362	4.51389	6.36486e-06	0.000864746
Contig78133	ref|XP_011173125.1| PREDICTED: uncharacterized protein LOC105205454 [Solenopsis invicta]	0.508062	18.8852	4.1831	4.51463	6.34265e-06	0.000863389
Contig111071	ref|XP_011875469.1| PREDICTED: disintegrin and metalloproteinase domain-containing protein 22 isoform X6 [Vollenhovia emeryi]	0.255972	18.8987	4.18995	4.51048	6.4682e-06	0.00087291
Contig77670	#N/A	0.364617	18.9207	4.18364	4.52254	6.11008e-06	0.000834948
Contig17184	#N/A	0.286482	18.9271	4.19577	4.51098	6.45282e-06	0.000871667
Contig126323	ref|XP_012219887.1| PREDICTED: uncharacterized protein LOC105670763 isoform X1 [Linepithema humile]	0.51066	18.928	4.19542	4.51159	6.43422e-06	0.000871632
Contig129392	#N/A	0.290638	18.9343	4.1919	4.51687	6.27616e-06	0.000855161
Contig34571	#N/A	0.339471	18.944	4.20596	4.50409	6.66593e-06	0.000891928
Contig58861	#N/A	0.278397	19.0043	4.192	4.53346	5.80253e-06	0.000799883
Contig143680	ref|XP_011865165.1| PREDICTED: axonemal 84 kDa protein-like [Vollenhovia emeryi]	0.467689	19.0166	4.19095	4.53755	5.69119e-06	0.00078838
Contig133053	#N/A	0.337707	19.0183	4.19122	4.53766	5.68827e-06	0.00078838
Contig121052	ref|XP_011865402.1| PREDICTED: probable cation-transporting ATPase 13A3 [Vollenhovia emeryi]	4.80361	19.0246	4.15334	4.58056	4.63728e-06	0.000681117
Contig86418	#N/A	0.284239	19.0256	4.19958	4.53036	5.88842e-06	0.000809354
Contig124176	ref|XP_011066301.1| PREDICTED: LOW QUALITY PROTEIN: protein real-time [Acromyrmex echinatior]	0.505731	19.0278	4.19087	4.54028	5.61786e-06	0.000782662
Contig47867	#N/A	0.263114	19.0316	4.18132	4.55157	5.32468e-06	0.00075346
Contig21522	#N/A	0.368725	19.0368	4.18672	4.54695	5.44294e-06	0.000764484
Contig64900	#N/A	0.34399	19.0398	4.20208	4.53104	5.86947e-06	0.000808322
Contig115224	ref|XP_012536971.1| PREDICTED: 5-hydroxytryptamine receptor 1-like isoform X1 [Monomorium pharaonis]	0.365856	19.0403	4.19545	4.53833	5.67022e-06	0.000787019
Contig72399	#N/A	1.32855	19.0422	4.18469	4.55044	5.35332e-06	0.000754898
Contig52959	#N/A	0.43403	19.0431	4.18917	4.54579	5.473e-06	0.000767183
Contig35048	#N/A	0.39588	19.0513	4.20208	4.53379	5.79345e-06	0.000799883
Contig34359	#N/A	0.241754	19.0551	4.19463	4.54274	5.5527e-06	0.000776044
Contig29953	ref|XP_013190478.1| PREDICTED: retrovirus-related Pol polyprotein from transposon TNT 1-94 [Amyelois transitella]	0.516412	19.0576	4.19122	4.54703	5.44079e-06	0.000764484
Contig73653	ref|XP_011877556.1| PREDICTED: polypyrimidine tract-binding protein 1 isoform X6 [Vollenhovia emeryi]	0.430806	19.0657	4.19958	4.53991	5.62775e-06	0.000782662
Contig54408	ref|XP_011865488.1| PREDICTED: uncharacterized protein LOC105560735 [Vollenhovia emeryi]	0.652432	19.0699	4.18358	4.55828	5.1575e-06	0.000741247
Contig42645	ref|XP_011860409.1| PREDICTED: uncharacterized protein LOC105557704 [Vollenhovia emeryi]	1.48975	19.07	4.18457	4.55721	5.18388e-06	0.000741247
Contig64874	ref|XP_011869361.1| PREDICTED: integrin alpha-PS1 isoform X2 [Vollenhovia emeryi]	5.20304	19.0761	4.1849	4.55832	5.15644e-06	0.000741247
Contig98512	ref|XP_011872886.1| PREDICTED: protein NETWORKED 1D-like isoform X2 [Vollenhovia emeryi]	0.323238	19.0795	4.19149	4.55196	5.31475e-06	0.000753217
Contig140286	ref|XP_012542672.1| PREDICTED: uncharacterized protein K02A2.6-like [Monomorium pharaonis]	0.324661	19.0797	4.19122	4.5523	5.30622e-06	0.000752763
Contig89567	ref|XP_011860147.1| PREDICTED: uncharacterized protein LOC105557504 isoform X2 [Vollenhovia emeryi]	0.385857	19.0834	4.1919	4.55245	5.3026e-06	0.000752763
Contig142105	#N/A	0.232258	19.0843	4.19215	4.55239	5.304e-06	0.000752763
Contig117057	ref|XP_011869259.1| PREDICTED: UNC93-like protein [Vollenhovia emeryi]	0.201551	19.0897	4.18573	4.56065	5.09944e-06	0.00073524
Contig69986	ref|XP_012541109.1| PREDICTED: ATP-dependent DNA helicase Q5-like isoform X2 [Monomorium pharaonis]	0.572692	19.0916	4.20596	4.53917	5.6475e-06	0.000784635
Contig108517	ref|XP_012231231.1| PREDICTED: alpha-aminoadipic semialdehyde synthase, mitochondrial isoform X2 [Linepithema humile]	0.843	19.0994	4.18352	4.56539	4.98563e-06	0.000721778
Contig73827	ref|XP_012532151.1| PREDICTED: uncharacterized protein LOC105834307 isoform X1 [Monomorium pharaonis]	0.757136	19.102	4.19843	4.54981	5.36952e-06	0.000756428
Contig64057	ref|XP_012056421.1| PREDICTED: 39S ribosomal protein L50, mitochondrial [Atta cephalotes]	0.88924	19.1032	4.19398	4.5549	5.24107e-06	0.00074652
Contig77002	ref|XP_011699507.1| PREDICTED: uncharacterized protein LOC105456864 [Wasmannia auropunctata]	0.34054	19.1058	4.19312	4.55646	5.20221e-06	0.000742482
Contig105418	ref|XP_012153868.1| PREDICTED: 52 kDa repressor of the inhibitor of the protein kinase-like isoform X2 [Megachile rotundata]	1.57346	19.1071	4.19812	4.55134	5.33052e-06	0.00075346
Contig138230	ref|XP_011871985.1| PREDICTED: uncharacterized protein LOC105564310 [Vollenhovia emeryi]	0.318252	19.1205	4.19584	4.55703	5.18832e-06	0.000741247
Contig93764	ref|XP_012535632.1| PREDICTED: uncharacterized protein LOC105836254 isoform X2 [Monomorium pharaonis]	0.386711	19.1339	4.20208	4.55344	5.27761e-06	0.000750967
Contig41210	#N/A	1.17897	19.1376	2.65509	7.2079	5.68193e-13	2.28818e-09
Contig37505	#N/A	0.424401	19.1377	4.20069	4.55584	5.21769e-06	0.000743939
Contig71842	#N/A	0.474649	19.1436	4.20035	4.55762	5.17361e-06	0.000741247
Contig71718	ref|XP_012522206.1| PREDICTED: LOW QUALITY PROTEIN: uncharacterized protein LOC105828431 [Monomorium pharaonis]	0.316192	19.1574	4.19166	4.57036	4.86883e-06	0.000709869
Contig39417	#N/A	0.286225	19.1582	4.192	4.57017	4.87323e-06	0.000709869
Contig66416	ref|XP_011866459.1| PREDICTED: uncharacterized protein LOC105561260 isoform X2 [Vollenhovia emeryi]	2.10436	19.1768	4.20042	4.56545	4.98427e-06	0.000721778
Contig63714	#N/A	0.266409	19.1803	4.20449	4.56186	5.07036e-06	0.000731794
Contig37557	#N/A	0.374724	19.1831	4.19958	4.56785	4.9275e-06	0.000716298
Contig128190	ref|XP_011881883.1| PREDICTED: uncharacterized protein LOC105569771 [Vollenhovia emeryi]	0.349174	19.1903	4.19149	4.57839	4.68566e-06	0.000687508
Contig52369	#N/A	0.733882	19.2094	4.18251	4.5928	4.37346e-06	0.000649797
Contig79480	ref|XP_011867280.1| PREDICTED: transmembrane protein 53 isoform X1 [Vollenhovia emeryi]	2.78227	19.2118	3.78571	5.07483	3.87843e-07	8.78026e-05
Contig87743	ref|XP_011161143.1| PREDICTED: apyrase-like [Solenopsis invicta]	0.431451	19.2299	4.19284	4.58637	4.51011e-06	0.000665898
Contig127323	#N/A	1.13326	19.2597	4.18814	4.59863	4.25283e-06	0.000634543
Contig81230	#N/A	0.403673	19.2615	4.19224	4.59457	4.33652e-06	0.000644987
Contig45058	ref|XP_011632041.1| PREDICTED: uncharacterized protein LOC105423824 [Pogonomyrmex barbatus]	0.298938	19.2705	4.18792	4.60146	4.19541e-06	0.0006273
Contig121566	#N/A	0.273591	19.2777	4.18076	4.61106	4.00623e-06	0.000604751
Contig146378	#N/A	0.191935	19.2803	4.18594	4.60597	4.10541e-06	0.000617108
Contig28050	ref|XP_011883867.1| PREDICTED: uncharacterized protein LOC105571009 isoform X2 [Vollenhovia emeryi]	0.516106	19.283	4.17749	4.61593	3.91339e-06	0.000595851
Contig51681	#N/A	0.322754	19.2837	4.20208	4.58909	4.45189e-06	0.00065937
Contig70495	#N/A	0.525299	19.2857	4.19449	4.59787	4.26833e-06	0.000636183
Contig78378	ref|XP_011173920.1| PREDICTED: glycogen [starch] synthase [Solenopsis invicta]	0.404493	19.2882	4.17995	4.61446	3.94125e-06	0.000598804
Contig134781	ref|XP_011643512.1| PREDICTED: uncharacterized protein LOC105431179 [Pogonomyrmex barbatus]	0.515247	19.2904	4.18991	4.60402	4.14421e-06	0.000621619
Contig131474	ref|XP_011157910.1| PREDICTED: uncharacterized protein LOC105194608 isoform X2 [Solenopsis invicta]	5.40482	19.2928	4.20596	4.58702	4.49621e-06	0.000664541
Contig114016	ref|XP_011876437.1| PREDICTED: short/branched chain specific acyl-CoA dehydrogenase, mitochondrial-like [Vollenhovia emeryi]	0.310321	19.2933	4.19251	4.60185	4.18759e-06	0.000626794
Contig31045	#N/A	0.339992	19.2978	4.18511	4.61107	4.0061e-06	0.000604751
Contig38840	#N/A	0.326563	19.3283	4.2	4.60197	4.18508e-06	0.000626794
Contig102865	#N/A	0.726487	19.3326	4.17976	4.62528	3.74094e-06	0.000575799
Contig19512	#N/A	0.99751	19.3469	4.18404	4.62398	3.76444e-06	0.000578785
Contig15535	#N/A	0.365834	19.3613	4.19135	4.61935	3.84947e-06	0.000587397
Contig59978	ref|XP_011704616.1| PREDICTED: structural maintenance of chromosomes protein 1A-like [Wasmannia auropunctata]	0.438533	19.3716	4.1908	4.62241	3.79309e-06	0.000581924
Contig31512	ref|XP_015119031.1| PREDICTED: uncharacterized protein LOC107042485 [Diachasma alloeum]	0.636032	19.3766	3.90637	4.96027	7.03949e-07	0.000145418
Contig33708	#N/A	0.42409	19.3804	4.20596	4.60785	4.06853e-06	0.000612869
Contig72774	#N/A	0.513687	19.3877	4.19735	4.61905	3.855e-06	0.0005876
Contig59677	#N/A	0.603317	19.3928	4.19687	4.62078	3.823e-06	0.000584884
Contig51127	ref|XP_011866432.1| PREDICTED: RE1-silencing transcription factor B-like isoform X2 [Vollenhovia emeryi]	0.372345	19.3932	4.19118	4.62715	3.70728e-06	0.000573116
Contig23927	ref|XP_011861004.1| PREDICTED: elongator complex protein 4 [Vollenhovia emeryi]	2.31477	19.3974	3.83918	5.05249	4.36097e-07	9.628e-05
Contig2070	#N/A	5.471	19.4044	4.17119	4.652	3.28724e-06	0.000517811
Contig63512	#N/A	0.337201	19.4067	4.17986	4.64289	3.43564e-06	0.000535221
Contig103641	#N/A	0.24905	19.415	4.18793	4.63595	3.553e-06	0.000552289
Contig107616	ref|XP_011061435.1| PREDICTED: very low-density lipoprotein receptor-like isoform X4 [Acromyrmex echinatior]	0.60145	19.4284	3.78997	5.12628	2.95521e-07	6.98264e-05
Contig139111	#N/A	0.379141	19.4285	4.19958	4.6263	3.72262e-06	0.00057369
Contig55714	#N/A	0.397232	19.4496	4.1845	4.64801	3.35155e-06	0.000525598
Contig126765	#N/A	1.01849	19.4502	4.17683	4.65668	3.21342e-06	0.000508451
Contig76526	ref|XP_011877022.1| PREDICTED: sodium/potassium/calcium exchanger 4-like [Vollenhovia emeryi]	0.438408	19.4527	4.20069	4.63083	3.642e-06	0.000564264
Contig80965	#N/A	0.749144	19.4614	4.17631	4.65996	3.16264e-06	0.000503234
Contig103133	#N/A	0.310004	19.4711	4.17769	4.66074	3.1508e-06	0.000501915
Contig78407	#N/A	0.426017	19.4755	4.19275	4.64504	3.40013e-06	0.00053086
Contig122272	ref|XP_012060634.1| PREDICTED: uncharacterized protein LOC105623871 [Atta cephalotes]	0.772091	19.4765	4.16849	4.67231	2.97825e-06	0.000480386
Contig102074	ref|XP_011647903.1| PREDICTED: sterile alpha and TIR motif-containing protein 1 isoform X2 [Pogonomyrmex barbatus]	0.361016	19.4765	4.19135	4.64684	3.3706e-06	0.000528
Contig134758	#N/A	0.277668	19.4777	4.18999	4.64864	3.34138e-06	0.000524586
Contig80126	#N/A	0.383624	19.5093	4.20069	4.6443	3.41227e-06	0.000532168
Contig89370	ref|XP_012538725.1| PREDICTED: sialin-like isoform X1 [Monomorium pharaonis]	1.26258	19.512	4.18562	4.66168	3.13644e-06	0.000500273
Contig68530	ref|XP_011159145.1| PREDICTED: uncharacterized protein LOC105195450 isoform X2 [Solenopsis invicta]	1.11762	19.5163	4.20071	4.64595	3.38512e-06	0.0005291
Contig43976	#N/A	0.298384	19.5168	4.2007	4.64609	3.38284e-06	0.0005291
Contig42466	#N/A	0.20682	19.5184	4.18623	4.66253	3.12344e-06	0.000499501
Contig3596	ref|XP_012064464.1| PREDICTED: anoctamin-4 [Atta cephalotes]	1.37325	19.5204	4.194	4.65436	3.24994e-06	0.000513653
Contig6553	ref|XP_011170160.1| PREDICTED: UPF0553 protein C9orf64-like [Solenopsis invicta]	0.799163	19.528	4.18443	4.66682	3.05891e-06	0.000490039
Contig25361	ref|XP_011865369.1| PREDICTED: 1-phosphatidylinositol 4,5-bisphosphate phosphodiesterase gamma-1 isoform X2 [Vollenhovia emeryi]	0.522712	19.5304	4.1924	4.65853	3.18479e-06	0.000505052
Contig148932	ref|XP_011637758.1| PREDICTED: LOW QUALITY PROTEIN: E3 ubiquitin-protein ligase TRAIP [Pogonomyrmex barbatus]	2.40973	19.5325	4.19364	4.65764	3.19847e-06	0.000506653
Contig140397	#N/A	0.65815	19.536	4.20216	4.64905	3.33473e-06	0.000524124
Contig14733	ref|XP_012150756.1| PREDICTED: longitudinals lacking protein, isoforms A/B/D/L-like isoform X29 [Megachile rotundata]	0.724046	19.5626	4.17233	4.68865	2.75018e-06	0.000447687
Contig97287	ref|XP_011870210.1| PREDICTED: C2 domain-containing protein 3 isoform X1 [Vollenhovia emeryi]	0.756251	19.5674	4.20596	4.65231	3.28231e-06	0.000517612
Contig111492	#N/A	0.255334	19.5747	4.18129	4.68149	2.848e-06	0.000460949
Contig96513	#N/A	0.345116	19.5948	4.18132	4.68627	2.78229e-06	0.000451873
Contig84884	ref|XP_011881898.1| PREDICTED: DNA polymerase zeta catalytic subunit [Vollenhovia emeryi]	0.380255	19.6052	4.20069	4.66712	3.05445e-06	0.00048988
Contig103693	ref|XP_011861520.1| PREDICTED: jerky protein homolog-like isoform X1 [Vollenhovia emeryi]	0.300084	19.6115	4.17921	4.69263	2.69718e-06	0.000442276
Contig98638	#N/A	0.360707	19.6162	4.18969	4.68201	2.84078e-06	0.000460314
Contig134064	ref|XP_012236297.1| PREDICTED: guanylate cyclase 32E [Bombus impatiens]	1.34292	19.6176	4.17888	4.69447	2.673e-06	0.000440195
Contig141406	#N/A	0.304821	19.6249	4.18624	4.68794	2.7597e-06	0.000448719
Contig114848	#N/A	5.1903	19.6419	2.88764	6.80207	1.03128e-11	1.34923e-08
Contig116524	#N/A	0.539653	19.6421	4.18352	4.69512	2.66451e-06	0.000439308
Contig35807	ref|XP_011055438.1| PREDICTED: glutamyl aminopeptidase-like [Acromyrmex echinatior]	0.29045	19.6545	4.18061	4.70135	2.58453e-06	0.000428287
Contig141576	ref|XP_012054768.1| PREDICTED: methionyl-tRNA formyltransferase, mitochondrial [Atta cephalotes]	0.528311	19.656	4.19118	4.68984	2.73415e-06	0.000446105
Contig138448	ref|XP_011060865.1| PREDICTED: arrestin domain-containing protein 2-like [Acromyrmex echinatior]	2.21756	19.6593	3.48632	5.63899	1.7105e-08	7.2362e-06
Contig34739	ref|XP_011875992.1| PREDICTED: decaprenyl-diphosphate synthase subunit 1 [Vollenhovia emeryi]	3.12417	19.6618	4.19208	4.69023	2.729e-06	0.000446045
Contig133537	ref|XP_011167444.1| PREDICTED: translation initiation factor IF-2, mitochondrial isoform X2 [Solenopsis invicta]	0.428758	19.6672	4.19097	4.69276	2.69544e-06	0.000442276
Contig103799	ref|XP_011879460.1| PREDICTED: Kv channel-interacting protein 2-like isoform X4 [Vollenhovia emeryi]	2.60956	19.6725	3.75285	5.24202	1.5883e-07	4.21473e-05
Contig48397	#N/A	0.248642	19.6858	4.18144	4.70789	2.5029e-06	0.000417042
Contig113397	#N/A	0.454274	19.686	4.19077	4.69748	2.63393e-06	0.000435282
Contig145368	ref|XP_011168289.1| PREDICTED: integrator complex subunit 8-like [Solenopsis invicta]	0.313934	19.689	4.18802	4.70127	2.58554e-06	0.000428287
Contig139002	#N/A	0.394897	19.697	4.18155	4.71045	2.47175e-06	0.000414296
Contig135982	ref|XP_011057164.1| PREDICTED: glucose dehydrogenase [FAD, quinone]-like [Acromyrmex echinatior]	3.75467	19.6986	3.55267	5.54472	2.94425e-08	1.10056e-05
Contig66089	ref|XP_011067304.1| PREDICTED: isopentenyl-diphosphate Delta-isomerase 1 [Acromyrmex echinatior]	0.351223	19.7117	4.2	4.69326	2.68886e-06	0.000442276
Contig42284	ref|XP_011687190.1| PREDICTED: TRAF3-interacting protein 1 [Wasmannia auropunctata]	0.345469	19.7201	4.18799	4.70873	2.49265e-06	0.000416809
Contig68649	#N/A	0.324831	19.7241	4.2	4.69623	2.65013e-06	0.000437448
Contig62366	#N/A	1.65836	19.7295	3.36431	5.86436	4.50859e-09	2.47879e-06
Contig110036	ref|XP_011875147.1| PREDICTED: recQ-mediated genome instability protein 1-like isoform X2 [Vollenhovia emeryi]	2.11641	19.7361	3.0697	6.42933	1.28166e-10	1.35145e-07
Contig83127	ref|XP_011696169.1| PREDICTED: leukotriene A-4 hydrolase [Wasmannia auropunctata]	0.816361	19.7368	4.19048	4.70991	2.47825e-06	0.000414893
Contig17853	ref|XP_011051086.1| PREDICTED: bifunctional arginine demethylase and lysyl-hydroxylase PSR [Acromyrmex echinatior]	0.295044	19.7414	4.18276	4.71971	2.3618e-06	0.000401582
Contig103522	#N/A	0.684417	19.7444	4.18744	4.71516	2.41525e-06	0.000405895
Contig132535	#N/A	0.237661	19.7556	4.18823	4.71693	2.39427e-06	0.000404548
Contig144568	ref|XP_011174651.1| PREDICTED: uncharacterized protein LOC105206894, partial [Solenopsis invicta]	0.437185	19.7677	4.19118	4.7165	2.39936e-06	0.000404548
Contig147784	ref|XP_012345296.1| PREDICTED: collagen alpha chain CG42342-like isoform X12 [Apis florea]	0.334953	19.7693	4.18988	4.71835	2.37764e-06	0.000403227
Contig2912	#N/A	0.180164	19.7934	4.19107	4.72277	2.32656e-06	0.000397067
Contig91650	ref|XP_012058883.1| PREDICTED: alpha-protein kinase 1 [Atta cephalotes]	0.331692	19.8022	4.19144	4.72444	2.3075e-06	0.000395204
Contig8300	#N/A	79.0483	19.8144	2.07459	9.55098	1.28475e-21	3.63063e-17
Contig103373	ref|XP_011863786.1| PREDICTED: saccharopine dehydrogenase-like oxidoreductase [Vollenhovia emeryi]	0.371687	19.817	4.18295	4.73756	2.163e-06	0.000373629
Contig109545	ref|XP_016840399.1| PREDICTED: kappa-theraphotoxin-Gr3a-like [Nasonia vitripennis]	7.79612	19.82	4.19831	4.72094	2.34757e-06	0.000399723
Contig64505	ref|XP_011869290.1| PREDICTED: tyrosine-protein phosphatase 10D isoform X1 [Vollenhovia emeryi]	0.381127	19.826	4.17947	4.74366	2.09887e-06	0.000364778
Contig83026	ref|XP_011637194.1| PREDICTED: intraflagellar transport protein 88 homolog [Pogonomyrmex barbatus]	2.88506	19.8279	3.84484	5.15702	2.50917e-07	6.11273e-05
Contig148089	#N/A	0.248734	19.8302	4.18525	4.73813	2.157e-06	0.000373046
Contig134948	#N/A	0.420089	19.8319	4.19709	4.72517	2.29927e-06	0.000394271
Contig40702	#N/A	0.440715	19.8355	4.2	4.72275	2.32681e-06	0.000397067
Contig74934	ref|XP_014664010.1| PREDICTED: LOW QUALITY PROTEIN: 60S acidic ribosomal protein P2-like [Priapulus caudatus]	0.507433	19.8443	4.20596	4.71814	2.38005e-06	0.000403227
Contig97862	ref|XP_012540636.1| PREDICTED: uncharacterized protein LOC105839115, partial [Monomorium pharaonis]	0.610728	19.8512	4.19094	4.7367	2.17224e-06	0.000374763
Contig142507	#N/A	0.445268	19.8638	4.18235	4.74942	2.04e-06	0.000355417
Contig33939	#N/A	0.578558	19.8678	4.20205	4.72813	2.266e-06	0.000389041
Contig131035	#N/A	0.379334	19.8768	4.18416	4.75048	2.02934e-06	0.000354
Contig100492	#N/A	0.274712	19.8894	4.18534	4.75216	2.01257e-06	0.000351779
Contig19528	#N/A	0.28457	19.9073	4.18924	4.752	2.01412e-06	0.000351779
Contig99269	#N/A	0.390816	19.9083	4.1853	4.75673	1.96752e-06	0.000345777
Contig124109	#N/A	0.199543	19.9097	4.19235	4.74905	2.04376e-06	0.000355636
Contig62537	ref|XP_011160899.1| PREDICTED: uncharacterized protein LOC105196580 [Solenopsis invicta]	0.298297	19.9101	4.19902	4.74161	2.12022e-06	0.000367584
Contig36949	ref|XP_011872867.1| PREDICTED: G protein-coupled receptor kinase 1 [Vollenhovia emeryi]	2.13126	19.9113	3.54314	5.61968	1.91314e-08	7.97407e-06
Contig139266	#N/A	0.367768	19.9171	4.19078	4.75259	2.00823e-06	0.000351619
Contig41515	ref|XP_011874752.1| PREDICTED: DDB1- and CUL4-associated factor 11 [Vollenhovia emeryi]	0.814806	19.9244	4.17449	4.77288	1.81607e-06	0.000325229
Contig130635	#N/A	0.286495	19.9304	4.1806	4.76736	1.86657e-06	0.000332586
Contig100307	ref|XP_011159048.1| PREDICTED: L-galactose dehydrogenase-like isoform X1 [Solenopsis invicta]	1.9204	19.9471	4.1947	4.75531	1.98145e-06	0.000347792
Contig85757	ref|XP_011686372.1| PREDICTED: intraflagellar transport protein 80 homolog [Wasmannia auropunctata]	2.45803	19.9537	4.19429	4.75735	1.96155e-06	0.000345157
Contig95605	#N/A	0.346197	19.9607	4.19432	4.75899	1.94568e-06	0.000343509
Contig57204	ref|XP_012064161.1| PREDICTED: protein MMS22-like [Atta cephalotes]	0.713828	19.9609	4.1993	4.75338	2.00042e-06	0.000350686
Contig137608	ref|XP_014609021.1| PREDICTED: nuclear factor 1 X-type isoform X3 [Polistes canadensis]	1.17642	19.9667	4.19183	4.76323	1.90516e-06	0.000337759
Contig81632	ref|XP_014477283.1| PREDICTED: uncharacterized protein LOC106745835 [Dinoponera quadriceps]	0.321905	19.9736	4.19189	4.76481	1.89032e-06	0.000335548
Contig131454	#N/A	0.188193	20.0037	4.18643	4.77822	1.76853e-06	0.000318159
Contig129833	#N/A	0.494855	20.0104	4.17223	4.7961	1.61783e-06	0.000295341
Contig81958	#N/A	0.576883	20.02	4.19661	4.77051	1.83759e-06	0.000328251
Contig150198	ref|XP_014296508.1| PREDICTED: uncharacterized protein LOC103571862 [Microplitis demolitor]	0.299073	20.0203	4.18698	4.78156	1.73943e-06	0.00031389
Contig52909	ref|XP_012539354.1| PREDICTED: S phase cyclin A-associated protein in the endoplasmic reticulum [Monomorium pharaonis]	1.79573	20.0227	4.17779	4.79264	1.646e-06	0.000299716
Contig32075	ref|XP_011169190.1| PREDICTED: uncharacterized protein KIAA0195 isoform X5 [Solenopsis invicta]	0.494198	20.023	4.19087	4.77778	1.77242e-06	0.000318219
Contig84897	#N/A	0.287365	20.0406	4.19214	4.78051	1.74853e-06	0.00031513
Contig105827	ref|XP_011874752.1| PREDICTED: DDB1- and CUL4-associated factor 11 [Vollenhovia emeryi]	0.515073	20.0437	4.19081	4.78277	1.729e-06	0.000312407
Contig100843	ref|XP_012536476.1| PREDICTED: probable cytochrome P450 12a5, mitochondrial [Monomorium pharaonis]	0.897555	20.0437	4.20596	4.76555	1.88335e-06	0.000334732
Contig103422	#N/A	0.209935	20.0524	4.18729	4.78886	1.67729e-06	0.000303452
Contig138336	#N/A	0.262501	20.0663	4.18846	4.79086	1.66065e-06	0.000301213
Contig25352	ref|XP_011877232.1| PREDICTED: tRNA (guanine-N(7)-)-methyltransferase isoform X1 [Vollenhovia emeryi]	3.03914	20.0833	4.19125	4.79173	1.65348e-06	0.000300685
Contig83466	ref|XP_011647984.1| PREDICTED: THO complex subunit 3 [Pogonomyrmex barbatus]	7.72671	20.0928	4.16854	4.82011	1.43476e-06	0.000266746
Contig122630	#N/A	0.199031	20.1116	4.18637	4.80407	1.55475e-06	0.000285301
Contig101881	ref|XP_014488017.1| PREDICTED: uncharacterized protein LOC106751597 [Dinoponera quadriceps]	0.227291	20.1155	4.19269	4.79776	1.60448e-06	0.000293664
Contig72583	#N/A	0.277697	20.116	4.19123	4.79955	1.59022e-06	0.000291432
Contig102558	#N/A	0.282384	20.1381	4.18128	4.81625	1.4628e-06	0.000270536
Contig127572	#N/A	0.407965	20.1382	4.17998	4.81778	1.45161e-06	0.000269171
Contig68598	#N/A	0.404719	20.1427	4.18648	4.81138	1.49891e-06	0.00027649
Contig83744	ref|XP_011155487.1| PREDICTED: ubiquitin domain-containing protein UBFD1-like [Solenopsis invicta]	0.379878	20.1522	4.17807	4.82333	1.41181e-06	0.000263172
Contig138696	ref|XP_014480450.1| PREDICTED: sterile alpha and TIR motif-containing protein 1 isoform X5 [Dinoponera quadriceps]	0.557684	20.1539	4.18216	4.81903	1.44261e-06	0.000267853
Contig12191	ref|XP_012526213.1| PREDICTED: proto-oncogene tyrosine-protein kinase ROS isoform X3 [Monomorium pharaonis]	0.646542	20.1682	4.17092	4.83545	1.32848e-06	0.000250343
Contig140512	ref|XP_011695770.1| PREDICTED: serine/threonine-protein kinase ICK isoform X3 [Wasmannia auropunctata]	0.634694	20.1784	4.19087	4.81486	1.47306e-06	0.000272078
Contig129271	ref|XP_014478543.1| PREDICTED: uncharacterized protein LOC106746451 [Dinoponera quadriceps]	0.226902	20.1943	4.19215	4.81717	1.45608e-06	0.000269646
Contig142711	ref|XP_014249829.1| PREDICTED: uncharacterized protein K02A2.6-like [Cimex lectularius]	0.33524	20.1977	4.18052	4.83139	1.3558e-06	0.00025441
Contig100976	#N/A	0.316686	20.2059	4.18278	4.83073	1.36033e-06	0.000254921
Contig134977	ref|XP_012239765.1| PREDICTED: acetylcholine receptor subunit alpha-like, partial [Bombus impatiens]	0.310656	20.2148	4.17942	4.83674	1.31985e-06	0.000249319
Contig79143	#N/A	0.6331	20.2307	4.20596	4.81001	1.50923e-06	0.000277669
Contig36323	#N/A	0.232701	20.234	4.19011	4.82898	1.37235e-06	0.000256833
Contig81343	#N/A	0.458781	20.2611	4.19352	4.83152	1.35494e-06	0.00025441
Contig139902	ref|XP_011865370.1| PREDICTED: 1-phosphatidylinositol 4,5-bisphosphate phosphodiesterase gamma-1 isoform X3 [Vollenhovia emeryi]	0.333275	20.2667	4.18529	4.84237	1.283e-06	0.000243662
Contig83973	ref|XP_011865761.1| PREDICTED: protein pelota [Vollenhovia emeryi]	0.656165	20.2736	4.1993	4.82785	1.38018e-06	0.000257958
Contig113878	ref|XP_011859007.1| PREDICTED: uncharacterized protein LOC105556520 [Vollenhovia emeryi]	0.5206	20.2767	4.18682	4.84299	1.279e-06	0.000243226
Contig71982	ref|XP_011870318.1| PREDICTED: cytochrome b561 domain-containing protein 2-like isoform X1 [Vollenhovia emeryi]	0.81281	20.2783	4.20208	4.82577	1.39461e-06	0.00026031
Contig65436	#N/A	0.353682	20.3146	4.18103	4.85875	1.18129e-06	0.000226784
Contig16866	#N/A	0.604344	20.3193	4.19224	4.84689	1.25412e-06	0.00023914
Contig16240	ref|XP_011640358.1| PREDICTED: uncharacterized protein LOC105429225 [Pogonomyrmex barbatus]	1.20376	20.3239	4.19884	4.84037	1.296e-06	0.000245136
Contig5499	ref|XP_011861492.1| PREDICTED: dynein intermediate chain 2, axonemal [Vollenhovia emeryi]	0.960714	20.3398	4.17383	4.87318	1.09817e-06	0.000212269
Contig140550	#N/A	0.437741	20.3504	4.17989	4.86865	1.12366e-06	0.000216307
Contig110591	ref|XP_012224668.1| PREDICTED: maltase 1-like [Linepithema humile]	3.0158	20.3983	4.18806	4.87059	1.11265e-06	0.000214774
Contig34063	#N/A	0.168625	20.423	4.19088	4.8732	1.098e-06	0.000212269
Contig102400	#N/A	0.170831	20.4254	4.18963	4.87523	1.08681e-06	0.000210649
Contig121725	ref|XP_011052092.1| PREDICTED: protein cramped-like [Acromyrmex echinatior]	5.30182	20.4449	2.86704	7.13101	9.96361e-13	2.42729e-09
Contig119966	ref|XP_011685299.1| PREDICTED: putative fatty acyl-CoA reductase CG5065 [Wasmannia auropunctata]	2.1107	20.4515	4.03611	5.06714	4.03837e-07	9.05729e-05
Contig140573	#N/A	0.279104	20.4709	4.18054	4.89671	9.74564e-07	0.000189935
Contig82327	#N/A	0.38627	20.4741	4.19958	4.87526	1.08664e-06	0.000210649
Contig128997	ref|XP_011687766.1| PREDICTED: LOW QUALITY PROTEIN: A disintegrin and metalloproteinase with thrombospondin motifs 2-like [Wasmannia auropunctata]	0.935366	20.5197	4.18395	4.90438	9.37249e-07	0.000183676
Contig97100	#N/A	1.08559	20.541	4.18038	4.91366	8.9392e-07	0.000176162
Contig128831	#N/A	0.551974	20.5656	4.18259	4.91696	8.79e-07	0.000174684
Contig66421	ref|XP_011866458.1| PREDICTED: uncharacterized protein LOC105561260 isoform X1 [Vollenhovia emeryi]	1.0835	20.5676	4.1904	4.90827	9.18838e-07	0.000180318
Contig148884	ref|XP_011699038.1| PREDICTED: mucin-6 isoform X2 [Wasmannia auropunctata]	0.185557	20.5891	4.18922	4.91479	8.88755e-07	0.000175634
Contig92407	#N/A	0.371115	20.6021	4.17856	4.93043	8.20467e-07	0.000164439
Contig68645	#N/A	0.213699	20.6068	4.18956	4.9186	8.71651e-07	0.000173467
Contig62231	ref|XP_011879719.1| PREDICTED: endoplasmic reticulum mannosyl-oligosaccharide 1,2-alpha-mannosidase [Vollenhovia emeryi]	0.35265	20.6172	4.19393	4.91596	8.83502e-07	0.000174925
Contig131756	#N/A	0.298974	20.6513	4.18281	4.93719	7.92576e-07	0.000159984
Contig127814	#N/A	0.496286	20.6726	4.17964	4.94601	7.57499e-07	0.000153561
Contig149533	#N/A	0.585641	20.69	4.17515	4.95551	7.21413e-07	0.000148584
Contig117020	#N/A	0.179943	20.699	4.19304	4.9365	7.95366e-07	0.00016009
Contig150241	#N/A	0.179943	20.699	4.19304	4.9365	7.95366e-07	0.00016009
Contig15635	#N/A	0.575761	20.7059	4.19559	4.93516	8.00844e-07	0.000160963
Contig109220	#N/A	0.345041	20.721	4.1832	4.9534	7.29291e-07	0.000149777
Contig48265	ref|XP_012223976.1| PREDICTED: LOW QUALITY PROTEIN: transient receptor potential cation channel protein painless [Linepithema humile]	0.272758	20.7211	4.18574	4.95039	7.4064e-07	0.000150576
Contig45553	#N/A	0.566484	20.7409	4.17878	4.9634	6.9271e-07	0.000143938
Contig134528	ref|XP_011686458.1| PREDICTED: sugar transporter SWEET1 [Wasmannia auropunctata]	0.847866	20.7474	4.19097	4.95051	7.40183e-07	0.000150576
Contig136839	ref|XP_011633500.1| PREDICTED: la-related protein 6 isoform X3 [Pogonomyrmex barbatus]	0.617704	20.7522	4.174	4.97178	6.63406e-07	0.000138665
Contig74130	ref|XP_011175179.1| PREDICTED: tubulin epsilon chain-like [Solenopsis invicta]	0.395066	20.7767	4.19958	4.94732	7.52426e-07	0.000152752
Contig107152	ref|XP_011643846.1| PREDICTED: facilitated trehalose transporter Tret1-2 homolog [Pogonomyrmex barbatus]	0.449341	20.7878	4.18463	4.96766	6.77672e-07	0.000141229
Contig44428	#N/A	0.431889	20.7894	4.1991	4.95092	7.38625e-07	0.000150576
Contig118870	#N/A	0.238882	20.7942	4.18522	4.96849	6.7476e-07	0.00014083
Contig143473	#N/A	0.277269	20.8209	4.1848	4.97535	6.5131e-07	0.00013654
Contig107946	ref|XP_011869153.1| PREDICTED: resistance to inhibitors of cholinesterase protein 3-like isoform X3 [Vollenhovia emeryi]	0.6618	20.8441	4.2	4.96288	6.9457e-07	0.000144113
Contig124186	#N/A	0.391131	20.8555	4.18681	4.98125	6.31737e-07	0.000133311
Contig112438	ref|XP_011865392.1| PREDICTED: uncharacterized protein KIAA0556-like isoform X2 [Vollenhovia emeryi]	1.74438	20.8655	4.0744	5.12112	3.03732e-07	7.14084e-05
Contig92812	#N/A	0.275466	20.883	4.19383	4.97945	6.37642e-07	0.000134073
Contig135178	ref|XP_011063755.1| PREDICTED: dihydroxyacetone phosphate acyltransferase [Acromyrmex echinatior]	0.595513	20.9426	4.18047	5.00963	5.45353e-07	0.000116576
Contig115911	ref|XP_011883987.1| PREDICTED: uncharacterized protein K02A2.6-like [Vollenhovia emeryi]	0.510917	20.9459	4.17896	5.01223	5.38e-07	0.000115536
Contig41718	ref|XP_011155821.1| PREDICTED: protein amalgam-like isoform X2 [Solenopsis invicta]	0.82251	20.9519	4.17935	5.0132	5.35327e-07	0.000115129
Contig32011	#N/A	0.365647	20.9675	4.17668	5.02015	5.16307e-07	0.000111719
Contig140314	#N/A	0.219804	20.9752	4.18652	5.01017	5.43821e-07	0.000116425
Contig288	#N/A	0.353507	20.9932	4.18135	5.02067	5.14927e-07	0.000111592
Contig79238	#N/A	0.227361	21.0067	4.18955	5.01408	5.32875e-07	0.000114777
Contig83974	ref|XP_011865761.1| PREDICTED: protein pelota [Vollenhovia emeryi]	0.405818	21.0313	4.2	5.00745	5.51556e-07	0.000117724
Contig26141	ref|XP_011875516.1| PREDICTED: RNA polymerase II subunit A C-terminal domain phosphatase isoform X1 [Vollenhovia emeryi]	3.19889	21.0391	3.86018	5.4503	5.0286e-08	1.69173e-05
Contig113087	#N/A	0.318936	21.0597	4.19641	5.0185	5.20764e-07	0.000112511
Contig126804	#N/A	0.231	21.0632	4.18823	5.02915	4.92647e-07	0.000107422
Contig96048	#N/A	0.512307	21.0691	4.19958	5.01695	5.25e-07	0.000113252
Contig76631	#N/A	0.282127	21.076	4.18531	5.03572	4.76e-07	0.000104125
Contig9562	ref|XP_011162761.1| PREDICTED: protein fem-1 homolog B, partial [Solenopsis invicta]	0.812947	21.0974	4.1993	5.02403	5.06e-07	0.00011016
Contig22805	ref|XP_011876551.1| PREDICTED: uncharacterized protein LOC105566822 [Vollenhovia emeryi]	1.33013	21.1083	4.19243	5.03486	4.78191e-07	0.000104431
Contig70935	#N/A	1.04377	21.1644	4.19995	5.0392	4.67494e-07	0.000102571
Contig52254	ref|XP_011861775.1| PREDICTED: uncharacterized protein LOC105558607 isoform X2 [Vollenhovia emeryi]	0.810515	21.1826	4.20596	5.03634	4.74519e-07	0.000103951
Contig113080	ref|XP_012055059.1| PREDICTED: serine protease nudel [Atta cephalotes]	1.18687	21.1864	4.19028	5.05608	4.28e-07	9.49278e-05
Contig78691	#N/A	0.4091	21.1864	4.19162	5.05447	4.31592e-07	9.55841e-05
Contig82559	#N/A	0.184859	21.1994	4.18953	5.06011	4.19e-07	9.32386e-05
Contig29970	#N/A	0.415227	21.2037	4.17843	5.07457	3.88378e-07	8.78026e-05
Contig54674	ref|XP_011069309.1| PREDICTED: F-box/WD repeat-containing protein 9-like [Acromyrmex echinatior]	0.228313	21.2218	4.18626	5.0694	3.99069e-07	8.96459e-05
Contig147126	ref|XP_011054804.1| PREDICTED: multiple inositol polyphosphate phosphatase 1 [Acromyrmex echinatior]	0.522798	21.223	4.19087	5.0641	4.10343e-07	9.17409e-05
Contig106995	#N/A	0.29082	21.2246	4.1864	5.06989	3.98053e-07	8.95601e-05
Contig26738	ref|XP_011687884.1| PREDICTED: gamma-glutamyltranspeptidase 1-like [Wasmannia auropunctata]	0.98672	21.2284	4.16872	5.0923	3.53737e-07	8.12714e-05
Contig149943	#N/A	0.185012	21.2563	4.1883	5.07515	3.87183e-07	8.78026e-05
Contig133293	ref|XP_015124771.1| PREDICTED: uncharacterized protein LOC107046627 [Diachasma alloeum]	0.270888	21.2671	4.18513	5.08158	3.74314e-07	8.53055e-05
Contig46640	ref|XP_011708000.1| PREDICTED: HAUS augmin-like complex subunit 3 [Wasmannia auropunctata]	2.84303	21.2973	4.19175	5.08077	3.75902e-07	8.55295e-05
Contig49923	ref|XP_011697214.1| PREDICTED: stromelysin-3-like [Wasmannia auropunctata]	2.01638	21.3267	4.17395	5.10948	3.23e-07	7.51992e-05
Contig124788	ref|XP_011693189.1| PREDICTED: putative Golgi pH regulator C [Wasmannia auropunctata]	0.425291	21.3312	4.19181	5.08878	3.6037e-07	8.26611e-05
Contig25067	ref|XP_011872380.1| PREDICTED: uncharacterized protein LOC105564547 [Vollenhovia emeryi]	51.6726	21.3417	4.19568	5.08659	3.64557e-07	8.33508e-05
Contig67643	ref|XP_012522862.1| PREDICTED: SCY1-like protein 2 isoform X2 [Monomorium pharaonis]	0.819914	21.3606	4.1993	5.08671	3.64322e-07	8.33508e-05
Contig40255	#N/A	0.378981	21.3779	4.18479	5.10848	3.24767e-07	7.54747e-05
Contig37858	ref|XP_011056923.1| PREDICTED: inhibitor of nuclear factor kappa-B kinase subunit beta-like isoform X1 [Acromyrmex echinatior]	1.03732	21.3972	4.19241	5.10379	3.32922e-07	7.69899e-05
Contig126134	ref|XP_011164546.1| PREDICTED: probable nuclear transport factor 2 isoform X1 [Solenopsis invicta]	0.571723	21.4053	4.19851	5.09832	3.4268e-07	7.8988e-05
Contig31937	#N/A	0.527416	21.408	4.18111	5.12017	3.05262e-07	7.16489e-05
Contig89657	ref|XP_011163078.1| PREDICTED: putative nuclease HARBI1 [Solenopsis invicta]	0.912955	21.4119	4.1775	5.12553	2.967e-07	6.99881e-05
Contig4316	#N/A	0.491854	21.4205	4.18038	5.12405	2.99e-07	7.04245e-05
Contig41272	ref|XP_011156932.1| PREDICTED: uncharacterized protein LOC105193941 [Solenopsis invicta]	0.848398	21.4373	4.17441	5.13541	2.81526e-07	6.71939e-05
Contig47670	#N/A	0.658969	21.4484	4.18392	5.12638	2.95363e-07	6.98264e-05
Contig79859	#N/A	0.318063	21.4697	4.20069	5.11099	3.20477e-07	7.47236e-05
Contig64048	ref|XP_003695175.1| PREDICTED: formin-like protein CG32138, partial [Apis florea]	1.22792	21.5019	4.16878	5.15783	2.49823e-07	6.10714e-05
Contig134185	#N/A	0.230449	21.5125	4.18568	5.13955	2.75401e-07	6.6055e-05
Contig38951	#N/A	0.384388	21.521	4.18757	5.13926	2.75819e-07	6.6055e-05
Contig51748	#N/A	0.365018	21.5406	4.18128	5.15167	2.58176e-07	6.2712e-05
Contig71764	#N/A	0.258712	21.5469	4.18711	5.14601	2.66081e-07	6.40486e-05
Contig91226	#N/A	0.234179	21.5486	4.18711	5.14641	2.65514e-07	6.4021e-05
Contig144485	ref|XP_011692346.1| PREDICTED: bifunctional glutamate/proline--tRNA ligase [Wasmannia auropunctata]	3.48425	21.5496	4.19794	5.13337	2.84603e-07	6.76997e-05
Contig45013	#N/A	0.516359	21.5595	4.1856	5.15087	2.59284e-07	6.28406e-05
Contig135035	#N/A	0.189148	21.5597	4.18728	5.14886	2.62076e-07	6.34084e-05
Contig107130	#N/A	0.208953	21.5683	4.18674	5.15157	2.5831e-07	6.2712e-05
Contig58412	ref|XP_011063608.1| PREDICTED: uncharacterized protein LOC105151536 [Acromyrmex echinatior]	0.219671	21.5716	4.18285	5.15714	2.50746e-07	6.11273e-05
Contig73244	#N/A	4.10169	21.5939	4.19428	5.14842	2.62697e-07	6.345e-05
Contig67758	#N/A	0.469647	21.5949	4.2	5.14164	2.72354e-07	6.5447e-05
Contig37922	#N/A	0.223964	21.61	4.18668	5.16161	2.44837e-07	6.00604e-05
Contig132681	ref|XP_012142856.1| PREDICTED: ankyrin repeat and death domain-containing protein 1A-like isoform X2 [Megachile rotundata]	1.21893	21.6405	4.17564	5.18256	2.18863e-07	5.49097e-05
Contig33672	ref|XP_012541827.1| PREDICTED: insulin-degrading enzyme isoform X1 [Monomorium pharaonis]	0.411397	21.6427	4.18043	5.17716	2.25289e-07	5.5945e-05
Contig115961	ref|XP_014680357.1| PREDICTED: LOW QUALITY PROTEIN: NADH-quinone oxidoreductase subunit F-like, partial [Priapulus caudatus]	0.284118	21.6564	4.18489	5.1749	2.28e-07	5.63292e-05
Contig139829	#N/A	0.254647	21.6634	4.18512	5.1763	2.2633e-07	5.61049e-05
Contig16320	ref|XP_012538989.1| PREDICTED: uncharacterized protein LOC105838180 isoform X2 [Monomorium pharaonis]	0.392842	21.6693	4.18453	5.17842	2.23777e-07	5.56673e-05
Contig72562	ref|XP_011171576.1| PREDICTED: uncharacterized protein LOC105204222 [Solenopsis invicta]	0.32986	21.6709	4.19973	5.16007	2.46855e-07	6.04503e-05
Contig99206	#N/A	0.410674	21.7065	4.19085	5.17949	2.22497e-07	5.54466e-05
Contig55423	#N/A	0.223238	21.7129	4.18983	5.18229	2.19177e-07	5.49097e-05
Contig92129	#N/A	4.8928	21.7251	4.19795	5.17517	2.27709e-07	5.63292e-05
Contig114776	ref|XP_012543251.1| PREDICTED: LOW QUALITY PROTEIN: dynein heavy chain 8, axonemal-like [Monomorium pharaonis]	0.413864	21.7291	4.18249	5.19524	2.04451e-07	5.15862e-05
Contig16660	ref|XP_012534556.1| PREDICTED: putative thiamine transporter SLC35F3 isoform X1 [Monomorium pharaonis]	0.656713	21.736	4.17999	5.20002	1.99271e-07	5.03692e-05
Contig101529	ref|XP_011874117.1| PREDICTED: rac GTPase-activating protein 1-like [Vollenhovia emeryi]	0.830085	21.737	4.17506	5.20639	1.92555e-07	4.89342e-05
Contig43919	#N/A	0.515956	21.7853	4.18654	5.20366	1.954e-07	4.94792e-05
Contig51513	ref|XP_011875779.1| PREDICTED: G protein-activated inward rectifier potassium channel 3-like isoform X4 [Vollenhovia emeryi]	0.78387	21.8109	4.17677	5.22195	1.77e-07	4.5238e-05
Contig49667	#N/A	0.544564	21.8122	4.17914	5.2193	1.79602e-07	4.58072e-05
Contig27254	ref|XP_012531032.1| PREDICTED: uncharacterized protein LOC105833673 [Monomorium pharaonis]	0.530569	21.8436	4.18187	5.22339	1.75672e-07	4.5049e-05
Contig68060	ref|XP_011059498.1| PREDICTED: uncharacterized protein LOC105149058, partial [Acromyrmex echinatior]	0.322392	21.8439	4.18241	5.22279	1.76243e-07	4.51133e-05
Contig87484	#N/A	0.816879	21.8777	4.18252	5.23074	1.68829e-07	4.39319e-05
Contig66984	ref|XP_012056988.1| PREDICTED: protein aurora borealis [Atta cephalotes]	2.02304	21.8818	3.92905	5.56924	2.55846e-08	9.85022e-06
Contig150162	#N/A	0.368362	21.8845	4.18757	5.22607	1.73154e-07	4.46463e-05
Contig31593	ref|XP_015438414.1| PREDICTED: LOW QUALITY PROTEIN: adenylate cyclase type 8-like [Dufourea novaeangliae]	0.323312	21.9074	4.1857	5.23387	1.66e-07	4.32737e-05
Contig119304	ref|XP_012540649.1| PREDICTED: neogenin isoform X5 [Monomorium pharaonis]	7.00999	21.9182	4.18495	5.23739	1.62864e-07	4.2762e-05
Contig81039	ref|XP_014470757.1| PREDICTED: guanine nucleotide-binding protein subunit beta-5 [Dinoponera quadriceps]	1.56828	21.9393	4.19833	5.22572	1.73475e-07	4.46475e-05
Contig103995	#N/A	0.266569	21.9534	4.19183	5.23719	1.63e-07	4.2762e-05
Contig42285	ref|XP_011162654.1| PREDICTED: TRAF3-interacting protein 1 [Solenopsis invicta]	0.405215	21.9616	4.1846	5.2482	1.5359e-07	4.09469e-05
Contig54310	ref|XP_008546343.2| PREDICTED: uncharacterized protein LOC103570404 isoform X2 [Microplitis demolitor]	0.598252	21.9842	4.19455	5.24114	1.59585e-07	4.21473e-05
Contig124057	#N/A	0.235212	21.9909	4.18612	5.2533	1.49401e-07	4.00569e-05
Contig119710	ref|XP_011700874.1| PREDICTED: receptor-type tyrosine-protein phosphatase S-like [Wasmannia auropunctata]	0.919603	22.0207	4.17565	5.27359	1.33784e-07	3.65633e-05
Contig96447	#N/A	0.905333	22.0255	4.17147	5.28004	1.29157e-07	3.57134e-05
Contig127397	#N/A	0.194167	22.0259	4.18827	5.25896	1.44869e-07	3.91387e-05
Contig141878	#N/A	0.259275	22.0317	4.18518	5.26422	1.40788e-07	3.82556e-05
Contig145143	ref|XP_012541803.1| PREDICTED: ELAV-like protein 3 isoform X9 [Monomorium pharaonis]	1.45407	22.0342	4.02565	5.47345	4.41349e-08	1.51362e-05
Contig23566	ref|XP_011873923.1| PREDICTED: LOW QUALITY PROTEIN: dynein heavy chain 1, axonemal-like [Vollenhovia emeryi]	0.920312	22.0376	4.18087	5.27104	1.3565e-07	3.70018e-05
Contig73049	ref|XP_012539938.1| PREDICTED: DCN1-like protein 1 [Monomorium pharaonis]	1.62136	22.0513	4.17736	5.27876	1.30064e-07	3.58337e-05
Contig101531	ref|XP_011874117.1| PREDICTED: rac GTPase-activating protein 1-like [Vollenhovia emeryi]	3.17417	22.0688	4.17679	5.28368	1.26615e-07	3.5148e-05
Contig37559	ref|XP_011050186.1| PREDICTED: uncharacterized protein LOC105143509 isoform X1 [Acromyrmex echinatior]	0.238788	22.0707	4.18822	5.26972	1.3663e-07	3.71973e-05
Contig72218	#N/A	0.361679	22.0922	4.18056	5.2845	1.26e-07	3.50595e-05
Contig52192	ref|XP_012224457.1| PREDICTED: uncharacterized protein LOC105673392 [Linepithema humile]	0.559887	22.095	4.19895	5.26201	1.42486e-07	3.85686e-05
Contig136754	#N/A	0.211167	22.1012	4.18715	5.27835	1.30353e-07	3.58337e-05
Contig74827	ref|XP_011168766.1| PREDICTED: nose resistant to fluoxetine protein 6-like isoform X2 [Solenopsis invicta]	0.627421	22.1059	4.17979	5.28875	1.23153e-07	3.44494e-05
Contig107460	ref|XP_011696904.1| PREDICTED: leupaxin isoform X4 [Wasmannia auropunctata]	0.674706	22.1116	4.17682	5.29388	1.19746e-07	3.37047e-05
Contig83032	ref|XP_011637194.1| PREDICTED: intraflagellar transport protein 88 homolog [Pogonomyrmex barbatus]	1.14077	22.1202	4.19054	5.2786	1.30174e-07	3.58337e-05
Contig107840	ref|XP_011873954.1| PREDICTED: pre-mRNA-splicing regulator female-lethal(2)D isoform X2 [Vollenhovia emeryi]	0.474427	22.1416	4.18489	5.29085	1.21748e-07	3.41321e-05
Contig139561	#N/A	0.385466	22.165	4.18798	5.29252	1.20641e-07	3.3889e-05
Contig116649	ref|XP_011635254.1| PREDICTED: serine/threonine-protein kinase SIK3-like isoform X1 [Pogonomyrmex barbatus]	1.06683	22.1818	4.18322	5.30257	1.14185e-07	3.23976e-05
Contig111016	#N/A	0.191985	22.1908	4.19025	5.29581	1.18488e-07	3.35511e-05
Contig55322	ref|XP_012235691.1| PREDICTED: uncharacterized protein LOC105679930 [Linepithema humile]	1.0491	22.1922	4.18234	5.30618	1.11949e-07	3.18913e-05
Contig78817	#N/A	0.548833	22.232	4.18844	5.30793	1.10876e-07	3.17133e-05
Contig107198	ref|XP_011632330.1| PREDICTED: LOW QUALITY PROTEIN: serine/threonine-protein kinase minibrain [Pogonomyrmex barbatus]	6.32371	22.2347	4.16718	5.33568	9.51874e-08	2.79039e-05
Contig140371	ref|XP_011864749.1| PREDICTED: uncharacterized protein LOC105560328 [Vollenhovia emeryi]	0.651267	22.2673	4.18363	5.32249	1.02358e-07	2.96978e-05
Contig65525	#N/A	0.286756	22.287	4.18711	5.32276	1.02202e-07	2.96978e-05
Contig64138	ref|XP_011861500.1| PREDICTED: polycomb protein suz12-B [Vollenhovia emeryi]	1.19707	22.2931	4.19847	5.30981	1.09739e-07	3.1573e-05
Contig119930	ref|XP_011064563.1| PREDICTED: kinesin-like protein KIF16B isoform X1 [Acromyrmex echinatior]	1.12196	22.2951	4.1991	5.30948	1.09938e-07	3.1573e-05
Contig102921	#N/A	2.89138	22.2986	4.20069	5.30832	1.10642e-07	3.17108e-05
Contig142217	ref|XP_011684509.1| PREDICTED: splicing factor, suppressor of white-apricot homolog isoform X2 [Wasmannia auropunctata]	2.39466	22.3138	4.20208	5.31019	1.09512e-07	3.1573e-05
Contig136934	#N/A	0.680529	22.3174	4.19088	5.32523	1.00826e-07	2.93741e-05
Contig33293	ref|XP_011867784.1| PREDICTED: putative methyltransferase NSUN6 isoform X1 [Vollenhovia emeryi]	0.517866	22.3178	4.17695	5.34309	9.13739e-08	2.70102e-05
Contig32269	ref|XP_011171674.1| PREDICTED: uncharacterized protein LOC105204324 [Solenopsis invicta]	0.227138	22.3307	4.19091	5.32837	9.90994e-08	2.89307e-05
Contig107375	#N/A	0.575213	22.3502	4.17778	5.34978	8.80624e-08	2.64182e-05
Contig116475	ref|XP_011867736.1| PREDICTED: PCTP-like protein isoform X5 [Vollenhovia emeryi]	1.06905	22.3568	4.17524	5.35462	8.57375e-08	2.58304e-05
Contig64018	ref|XP_011687460.1| PREDICTED: uncharacterized protein LOC105449774 [Wasmannia auropunctata]	0.253568	22.3674	4.18654	5.3427	9.15708e-08	2.70119e-05
Contig99177	#N/A	0.760257	22.3814	4.18614	5.34655	8.96481e-08	2.67237e-05
Contig111512	#N/A	0.453649	22.3871	4.17837	5.35785	8.42176e-08	2.55358e-05
Contig29389	#N/A	1.38804	22.4066	4.17641	5.36505	8.09275e-08	2.47949e-05
Contig133474	ref|XP_011647212.1| PREDICTED: LOW QUALITY PROTEIN: vacuolar protein sorting-associated protein 51 homolog [Pogonomyrmex barbatus]	1.58564	22.4089	4.19817	5.33779	9.40876e-08	2.76389e-05
Contig41320	#N/A	0.394658	22.4183	4.18595	5.3556	8.52734e-08	2.57455e-05
Contig113765	ref|XP_011867503.1| PREDICTED: uncharacterized protein LOC105561796 isoform X2 [Vollenhovia emeryi]	2.72787	22.4184	3.81018	5.88381	4e-09	2.28421e-06
Contig135668	ref|XP_011051107.1| PREDICTED: uncharacterized protein LOC105144108 [Acromyrmex echinatior]	2.19194	22.4188	4.04956	5.5361	3.09282e-08	1.13967e-05
Contig118865	ref|XP_011642346.1| PREDICTED: LOW QUALITY PROTEIN: uncharacterized protein LOC105430465 [Pogonomyrmex barbatus]	0.895254	22.4375	4.17216	5.3779	7.53583e-08	2.33507e-05
Contig105089	ref|XP_011860219.1| PREDICTED: myotubularin-related protein 10-B isoform X2 [Vollenhovia emeryi]	3.22096	22.4384	3.32761	6.74311	1.55035e-11	1.95589e-08
Contig74280	ref|XP_011882433.1| PREDICTED: uncharacterized protein LOC105570082, partial [Vollenhovia emeryi]	5.94452	22.439	4.19794	5.34525	9.02944e-08	2.68032e-05
Contig113092	ref|XP_011160183.1| PREDICTED: protein kinase C isoform X1 [Solenopsis invicta]	1.57962	22.4403	3.89569	5.7603	8.39669e-09	4.0915e-06
Contig39636	#N/A	5.8988	22.4406	4.19794	5.34562	9.01061e-08	2.68032e-05
Contig17145	ref|XP_011864539.1| PREDICTED: cytochrome P450 4c3-like [Vollenhovia emeryi]	0.755744	22.4507	4.19867	5.3471	8.93758e-08	2.66988e-05
Contig121590	#N/A	0.257093	22.4626	4.189	5.36228	8.21798e-08	2.50794e-05
Contig123916	ref|XP_016655824.1| PREDICTED: uncharacterized protein LOC103311964 [Acyrthosiphon pisum]	0.216734	22.4635	4.18726	5.36473	8.10721e-08	2.47949e-05
Contig14606	ref|XP_011065794.1| PREDICTED: probable nuclear hormone receptor HR3 isoform X2 [Acromyrmex echinatior]	0.69948	22.4739	4.1768	5.38065	7.42194e-08	2.31501e-05
Contig134195	ref|XP_011061518.1| PREDICTED: embryonic polyadenylate-binding protein B-like [Acromyrmex echinatior]	0.581216	22.4797	3.75137	5.9924	2.06765e-09	1.35256e-06
Contig110922	ref|XP_011880242.1| PREDICTED: jmjC domain-containing histone demethylation protein 1-like [Vollenhovia emeryi]	1.97118	22.4803	3.49549	6.43123	1.26576e-10	1.34472e-07
Contig50298	#N/A	0.393024	22.4845	4.2	5.35344	8.62955e-08	2.59432e-05
Contig65589	ref|XP_011635144.1| PREDICTED: nephrin [Pogonomyrmex barbatus]	0.496319	22.5157	4.17561	5.3922	6.95992e-08	2.19024e-05
Contig3398	#N/A	0.235077	22.5214	4.18139	5.38609	7.2e-08	2.25094e-05
Contig100450	#N/A	0.630153	22.5409	4.19884	5.36836	7.94568e-08	2.44065e-05
Contig115550	ref|XP_012234439.1| PREDICTED: uncharacterized protein LOC105679152 [Linepithema humile]	0.980594	22.557	3.62692	6.21931	4.99355e-10	4.10217e-07
Contig29237	ref|XP_011871144.1| PREDICTED: hemicentin-2 [Vollenhovia emeryi]	4.85335	22.5597	4.18251	5.39382	6.9e-08	2.18033e-05
Contig93244	#N/A	0.505523	22.562	4.18569	5.39027	7.035e-08	2.20894e-05
Contig54562	ref|XP_011877461.1| PREDICTED: chromosome transmission fidelity protein 18 homolog [Vollenhovia emeryi]	3.81378	22.5679	4.16797	5.41461	6.14225e-08	1.99513e-05
Contig104509	#N/A	0.437053	22.5697	4.19502	5.38013	7.44338e-08	2.31658e-05
Contig70110	ref|XP_011866691.1| PREDICTED: activating signal cointegrator 1 complex subunit 2-like isoform X2 [Vollenhovia emeryi]	0.945727	22.5708	4.17888	5.40115	6.62144e-08	2.10245e-05
Contig107110	#N/A	0.253614	22.5729	4.18566	5.39292	6.93207e-08	2.18634e-05
Contig83809	ref|XP_011643824.1| PREDICTED: ATPase WRNIP1-like [Pogonomyrmex barbatus]	0.843456	22.5859	4.18283	5.39966	6.67679e-08	2.11527e-05
Contig22183	ref|XP_011686973.1| PREDICTED: guanylate cyclase 32E isoform X1 [Wasmannia auropunctata]	1.07164	22.5904	4.16796	5.42002	5.95939e-08	1.96281e-05
Contig52030	ref|XP_011053020.1| PREDICTED: trithorax group protein osa-like [Acromyrmex echinatior]	2.53166	22.6174	4.16871	5.42552	5.77864e-08	1.92042e-05
Contig108094	#N/A	0.52562	22.6266	4.17214	5.42327	5.85186e-08	1.93189e-05
Contig86305	#N/A	0.824457	22.6739	4.17939	5.42517	5.78993e-08	1.92042e-05
Contig111585	#N/A	9.19121	22.6971	4.19792	5.40676	6.41759e-08	2.05155e-05
Contig108996	#N/A	6.31423	22.6973	4.19002	5.41698	6.06154e-08	1.98259e-05
Contig135077	ref|XP_011702725.1| PREDICTED: molybdenum cofactor sulfurase 3 [Wasmannia auropunctata]	1.67692	22.7157	4.18775	5.42431	5.81784e-08	1.92516e-05
Contig25263	#N/A	0.540328	22.7169	4.19652	5.41327	6.18825e-08	1.9963e-05
Contig124585	ref|XP_011872665.1| PREDICTED: probable Ras GTPase-activating protein isoform X5 [Vollenhovia emeryi]	1.11186	22.732	3.55118	6.40123	1.54126e-10	1.56673e-07
Contig76784	#N/A	0.524706	22.752	4.2	5.41715	6.05576e-08	1.98259e-05
Contig84523	ref|XP_011865236.1| PREDICTED: vacuolar protein sorting-associated protein 13A-like isoform X2 [Vollenhovia emeryi]	0.321881	22.7579	4.19958	5.41908	5.99062e-08	1.9685e-05
Contig37654	ref|XP_012522496.1| PREDICTED: putative adenosylhomocysteinase 2 isoform X2 [Monomorium pharaonis]	1.0794	22.7933	4.1993	5.42788	5.7e-08	1.90045e-05
Contig84389	#N/A	0.310257	22.8027	4.17891	5.45661	4.85304e-08	1.64048e-05
Contig129586	#N/A	0.299319	22.8177	4.18948	5.44643	5.13895e-08	1.72475e-05
Contig119836	ref|XP_011163964.1| PREDICTED: putative aminopeptidase W07G4.4 [Solenopsis invicta]	1.7557	22.8528	4.19958	5.44168	5.27813e-08	1.76726e-05
Contig95191	ref|XP_012532713.1| PREDICTED: Bardet-Biedl syndrome 7 protein homolog [Monomorium pharaonis]	1.41147	22.8548	4.17717	5.47135	4.46614e-08	1.52428e-05
Contig50375	ref|XP_011859613.1| PREDICTED: uncharacterized protein LOC105557079 [Vollenhovia emeryi]	0.277318	22.8777	4.18509	5.46648	4.59067e-08	1.56131e-05
Contig71817	#N/A	0.352197	22.8799	4.18568	5.46624	4.6e-08	1.56131e-05
Contig119063	ref|XP_011877453.1| PREDICTED: protein transport protein Sec23A isoform X2 [Vollenhovia emeryi]	1.98849	22.8814	3.8376	5.96242	2.48531e-09	1.589e-06
Contig131462	#N/A	0.680392	22.8948	4.17419	5.48484	4.13842e-08	1.43672e-05
Contig77982	#N/A	0.283125	22.9056	4.18613	5.47178	4.45535e-08	1.52428e-05
Contig138132	ref|XP_011695879.1| PREDICTED: lipase 3-like [Wasmannia auropunctata]	1.00761	22.9255	4.1752	5.49086	4e-08	1.39546e-05
Contig58364	#N/A	0.314541	22.9397	4.18622	5.47982	4.25767e-08	1.46374e-05
Contig54379	#N/A	0.470522	22.9457	4.17761	5.49253	3.96226e-08	1.38578e-05
Contig122836	ref|XP_012522712.1| PREDICTED: TM2 domain-containing protein CG10795 [Monomorium pharaonis]	1.23309	22.9774	4.17432	5.50447	3.7e-08	1.32012e-05
Contig116865	ref|XP_002169704.3| PREDICTED: uncharacterized protein LOC100209634 [Hydra vulgaris]	0.276276	22.9867	4.18022	5.49891	3.82143e-08	1.34652e-05
Contig89875	#N/A	0.347248	23.0081	4.18668	5.49554	3.9e-08	1.36908e-05
Contig11468	ref|XP_011875542.1| PREDICTED: uncharacterized protein LOC105566272 [Vollenhovia emeryi]	17.2127	23.0221	4.18209	5.50493	3.69312e-08	1.32012e-05
Contig96778	#N/A	0.622559	23.0268	4.19895	5.48393	4.15972e-08	1.44058e-05
Contig40737	#N/A	0.234566	23.0432	4.18821	5.50191	3.75706e-08	1.33048e-05
Contig2560	#N/A	0.864942	23.0437	4.19047	5.49907	3.81804e-08	1.34652e-05
Contig148903	#N/A	0.577967	23.0526	4.1782	5.51736	3.44139e-08	1.24363e-05
Contig136630	#N/A	0.265613	23.0699	4.18567	5.51165	3.55479e-08	1.27483e-05
Contig149631	#N/A	0.306445	23.0892	4.18586	5.516	3.46793e-08	1.24684e-05
Contig1769	#N/A	0.447047	23.0993	4.17887	5.52765	3.24553e-08	1.18804e-05
Contig34694	#N/A	0.405871	23.1	4.18514	5.51952	3.4e-08	1.23473e-05
Contig12620	#N/A	0.292931	23.1347	4.18465	5.52847	3.23044e-08	1.18559e-05
Contig61082	ref|XP_014473234.1| PREDICTED: uncharacterized protein LOC106743678, partial [Dinoponera quadriceps]	11.1574	23.1652	4.19793	5.51824	3.42406e-08	1.24054e-05
Contig41727	ref|XP_011159588.1| PREDICTED: ATP-dependent DNA helicase 2 subunit 1-like [Solenopsis invicta]	11.5232	23.1796	4.19792	5.52168	3.35776e-08	1.22521e-05
Contig43971	#N/A	0.374405	23.1927	4.17577	5.55411	2.79025e-08	1.05134e-05
Contig36663	#N/A	0.328575	23.2015	4.17857	5.5525	2.81615e-08	1.05828e-05
Contig149731	ref|XP_012225889.1| PREDICTED: uncharacterized protein LOC105674266 [Linepithema humile]	0.399129	23.2168	4.17689	5.55838	2.72283e-08	1.03144e-05
Contig29930	ref|XP_012533065.1| PREDICTED: potassium voltage-gated channel protein Shal isoform X2 [Monomorium pharaonis]	2.13523	23.2438	4.16855	5.57599	2.46129e-08	9.58051e-06
Contig104697	ref|XP_011684310.1| PREDICTED: uncharacterized protein LOC105447802 [Wasmannia auropunctata]	0.366874	23.2552	4.18962	5.55067	2.84575e-08	1.06657e-05
Contig2998	#N/A	0.26168	23.2588	4.18657	5.55558	2.76685e-08	1.04531e-05
Contig34077	#N/A	0.634499	23.2603	4.1804	5.56413	2.63468e-08	1.00073e-05
Contig23125	ref|XP_011173491.1| PREDICTED: transient receptor potential cation channel protein painless-like [Solenopsis invicta]	13.9451	23.2649	4.19809	5.54179	2.99391e-08	1.11091e-05
Contig104470	#N/A	0.41003	23.2665	4.20002	5.53962	3.03132e-08	1.12125e-05
Contig65666	#N/A	0.344336	23.2911	4.18259	5.56859	2.56814e-08	9.86061e-06
Contig70208	ref|XP_012533218.1| PREDICTED: acidic fibroblast growth factor intracellular-binding protein [Monomorium pharaonis]	3.42352	23.3066	2.89454	8.05192	8.15038e-16	9.59687e-12
Contig130523	#N/A	0.233925	23.3274	4.18824	5.56974	2.55125e-08	9.84929e-06
Contig73516	#N/A	0.458628	23.3303	4.18458	5.5753	2.47109e-08	9.59224e-06
Contig11469	ref|XP_011860245.1| PREDICTED: uncharacterized protein LOC105557580 isoform X2 [Vollenhovia emeryi]	34.4545	23.3327	4.17537	5.58819	2.29453e-08	9.107e-06
Contig88988	ref|XP_015119540.1| PREDICTED: uncharacterized protein LOC107042851 [Diachasma alloeum]	0.423353	23.3516	4.18616	5.57829	2.42896e-08	9.50707e-06
Contig108581	ref|XP_012532591.1| PREDICTED: diacylglycerol kinase 1 [Monomorium pharaonis]	1.11449	23.3519	4.17624	5.59161	2.24971e-08	8.95429e-06
Contig95163	ref|XP_011864288.1| PREDICTED: integrin beta-nu isoform X1 [Vollenhovia emeryi]	3.61774	23.3535	4.16904	5.60165	2.12322e-08	8.53431e-06
Contig112776	#N/A	0.352824	23.3557	4.18456	5.5814	2.38592e-08	9.36454e-06
Contig109608	ref|XP_011056082.1| PREDICTED: set1/Ash2 histone methyltransferase complex subunit ASH2 isoform X1 [Acromyrmex echinatior]	2.9444	23.3713	4.19874	5.56625	2.6e-08	9.93977e-06
Contig137645	ref|XP_011881225.1| PREDICTED: glucagon receptor-like isoform X1 [Vollenhovia emeryi]	6.04248	23.3829	4.17235	5.60425	2.09163e-08	8.50577e-06
Contig60989	ref|XP_012540424.1| PREDICTED: transcriptional adapter 2B isoform X2 [Monomorium pharaonis]	1.8389	23.3995	4.17704	5.60193	2.11974e-08	8.53431e-06
Contig17456	ref|XP_012056871.1| PREDICTED: F-box/LRR-repeat protein 4-like [Atta cephalotes]	0.437713	23.4078	4.1847	5.59367	2.22323e-08	8.87389e-06
Contig35225	#N/A	0.59925	23.4187	4.18085	5.60142	2.12607e-08	8.53431e-06
Contig84027	#N/A	1.08856	23.4238	4.2007	5.57618	2.45863e-08	9.58051e-06
Contig115981	#N/A	0.289749	23.4525	4.18569	5.60302	2.10648e-08	8.52834e-06
Contig128620	#N/A	0.179645	23.4737	4.18829	5.60459	2.08743e-08	8.50577e-06
Contig138702	#N/A	0.179645	23.4737	4.18829	5.60459	2.08743e-08	8.50577e-06
Contig30756	ref|XP_011686459.1| PREDICTED: uncharacterized protein LOC105449160 isoform X1 [Wasmannia auropunctata]	0.353588	23.491	4.18483	5.61336	1.9843e-08	8.17423e-06
Contig76834	#N/A	0.304002	23.5162	4.18565	5.61828	1.92865e-08	8.01131e-06
Contig76788	ref|XP_015114275.1| PREDICTED: 60S ribosomal protein L30 [Diachasma alloeum]	0.895276	23.5205	3.1576	7.44885	9.4156e-14	6.04725e-10
Contig132689	ref|XP_012526984.1| PREDICTED: GRAM domain-containing protein 1B-like [Monomorium pharaonis]	2.5332	23.5282	3.73601	6.29769	3.02122e-10	2.86124e-07
Contig20704	ref|XP_012232433.1| PREDICTED: microtubule organizer protein 1-like [Linepithema humile]	0.423203	23.5403	4.1853	5.62451	1.8604e-08	7.80026e-06
Contig115494	#N/A	0.327	23.5661	4.19099	5.62305	1.87614e-08	7.843e-06
Contig119452	#N/A	0.279691	23.6357	4.18618	5.64611	1.64115e-08	6.98464e-06
Contig66474	ref|XP_011879931.1| PREDICTED: glutamate receptor ionotropic, kainate 2-like [Vollenhovia emeryi]	9.48299	23.6677	2.45652	9.63469	5.70665e-22	2.01583e-17
Contig73670	ref|XP_011882902.1| PREDICTED: rho GTPase-activating protein 26 isoform X1 [Vollenhovia emeryi]	0.808159	23.6703	4.18404	5.65727	1.53795e-08	6.5652e-06
Contig107811	ref|XP_012224292.1| PREDICTED: glutamate-gated chloride channel isoform X9 [Linepithema humile]	2.18144	23.6751	4.17539	5.67015	1.42673e-08	6.20287e-06
Contig106338	#N/A	0.32466	23.6789	4.17685	5.66907	1.43573e-08	6.22282e-06
Contig147542	ref|XP_012525196.1| PREDICTED: zinc finger protein 850-like isoform X1 [Monomorium pharaonis]	0.363942	23.6832	4.17858	5.66776	1.44673e-08	6.25133e-06
Contig11834	ref|XP_012559998.1| PREDICTED: uncharacterized protein LOC105846126 [Hydra vulgaris]	1.4336	23.6959	4.1764	5.67376	1.4e-08	6.11121e-06
Contig24034	#N/A	0.390098	23.6959	4.176	5.67431	1.39248e-08	6.11089e-06
Contig99226	#N/A	0.217871	23.7268	4.18728	5.66639	1.45834e-08	6.2823e-06
Contig17154	ref|XP_011174795.1| PREDICTED: LOW QUALITY PROTEIN: putative epidermal cell surface receptor [Solenopsis invicta]	0.980073	23.7321	4.19347	5.6593	1.51989e-08	6.50774e-06
Contig38848	#N/A	0.582941	23.7406	4.17709	5.68352	1.31948e-08	5.88136e-06
Contig32443	ref|XP_014480864.1| PREDICTED: microtubule-associated serine/threonine-protein kinase 3 isoform X2 [Dinoponera quadriceps]	0.389018	23.7735	4.18595	5.67936	1.35198e-08	5.98842e-06
Contig76818	ref|XP_012522226.1| PREDICTED: serine protease 27-like [Monomorium pharaonis]	0.857141	23.7929	4.19153	5.67642	1.37544e-08	6.07329e-06
Contig29921	ref|XP_011875537.1| PREDICTED: U2 snRNP-associated SURP motif-containing protein isoform X1 [Vollenhovia emeryi]	1.24615	23.7995	4.17569	5.69953	1.2e-08	5.38884e-06
Contig133529	ref|XP_011878775.1| PREDICTED: trace amine-associated receptor 9 [Vollenhovia emeryi]	1.37332	23.8098	4.17533	5.70249	1.18069e-08	5.36425e-06
Contig42878	#N/A	0.333604	23.8242	4.18712	5.68987	1.27134e-08	5.68471e-06
Contig51551	ref|XP_011631511.1| PREDICTED: uncharacterized protein LOC105423464 [Pogonomyrmex barbatus]	0.579867	23.832	4.2	5.6743	1.3926e-08	6.11089e-06
Contig75159	ref|XP_011176247.1| PREDICTED: homeobox protein rough [Solenopsis invicta]	1.48108	23.8606	4.17783	5.71124	1.12159e-08	5.16093e-06
Contig35124	ref|XP_011691488.1| PREDICTED: regulating synaptic membrane exocytosis protein 2 [Wasmannia auropunctata]	2.26053	23.8642	4.18598	5.70099	1.19117e-08	5.38268e-06
Contig98612	ref|XP_012528722.1| PREDICTED: kinesin-related protein 4 isoform X1 [Monomorium pharaonis]	4.69099	23.8866	4.19027	5.70048	1.19472e-08	5.38268e-06
Contig138037	ref|XP_012217769.1| PREDICTED: uncharacterized SDCCAG3 family protein-like [Linepithema humile]	0.365925	23.8868	4.18507	5.70763	1.14559e-08	5.22156e-06
Contig144129	ref|XP_012059313.1| PREDICTED: zinc finger protein 16-like [Atta cephalotes]	2.54882	23.8999	4.16361	5.74019	9.45721e-09	4.46915e-06
Contig134128	ref|XP_011861835.1| PREDICTED: dnaJ homolog subfamily C member 13, partial [Vollenhovia emeryi]	1.46742	23.9355	4.19174	5.71017	1.12864e-08	5.16093e-06
Contig45567	ref|XP_012543383.1| PREDICTED: uncharacterized protein LOC105840848 [Monomorium pharaonis]	0.387548	23.9425	4.18465	5.7215	1.05587e-08	4.87553e-06
Contig144396	#N/A	0.334231	23.97	4.18564	5.72673	1.02385e-08	4.7745e-06
Contig66952	ref|XP_011877076.1| PREDICTED: uncharacterized protein LOC105567114 isoform X1 [Vollenhovia emeryi]	1.34721	23.9896	4.17536	5.74551	9.16417e-09	4.37456e-06
Contig118044	#N/A	0.220536	24.0022	4.18916	5.72958	1.00679e-08	4.71049e-06
Contig24167	ref|XP_011646195.1| PREDICTED: retinoid-inducible serine carboxypeptidase-like isoform X1 [Pogonomyrmex barbatus]	32.4025	24.0188	4.20596	5.71066	1.12541e-08	5.16093e-06
Contig122362	ref|XP_011879066.1| PREDICTED: aminopeptidase N-like isoform X1 [Vollenhovia emeryi]	2.63473	24.0284	4.1914	5.73278	9.87993e-09	4.63789e-06
Contig94914	#N/A	3.92551	24.0343	4.16181	5.77496	7.69715e-09	3.85668e-06
Contig118414	ref|XP_011161834.1| PREDICTED: uncharacterized protein C05D11.1-like isoform X1 [Solenopsis invicta]	0.416034	24.0433	4.18375	5.74684	9.09268e-09	4.35515e-06
Contig101813	#N/A	0.221584	24.0615	4.18912	5.74381	9.25708e-09	4.404e-06
Contig131823	#N/A	0.38117	24.0866	4.18474	5.75581	8.62251e-09	4.15814e-06
Contig37294	ref|XP_011688058.1| PREDICTED: FAD synthase-like [Wasmannia auropunctata]	1.37837	24.1098	4.1991	5.74165	9.37597e-09	4.44563e-06
Contig109201	#N/A	0.442509	24.1232	4.17796	5.77392	7.74478e-09	3.86375e-06
Contig86635	ref|XP_008203449.1| PREDICTED: uncharacterized protein LOC103315584 [Nasonia vitripennis]	1.19804	24.1252	4.1914	5.75588	8.61937e-09	4.15814e-06
Contig126917	ref|XP_012064166.1| PREDICTED: uncharacterized protein LOC105627497 [Atta cephalotes]	4.69009	24.1291	3.04765	7.91728	2.42755e-15	2.45004e-11
Contig78050	ref|XP_011868073.1| PREDICTED: dehydrogenase/reductase SDR family member on chromosome X-like [Vollenhovia emeryi]	1.45129	24.1313	4.17343	5.78214	7.37578e-09	3.7165e-06
Contig62627	ref|XP_011687158.1| PREDICTED: 4-nitrophenylphosphatase-like [Wasmannia auropunctata]	0.366352	24.1323	4.18513	5.76619	8.10846e-09	3.97813e-06
Contig146213	ref|XP_011159909.1| PREDICTED: protein quiver [Solenopsis invicta]	0.455804	24.1554	4.18505	5.77182	7.84204e-09	3.88792e-06
Contig42347	#N/A	3.02645	24.1679	4.20106	5.75282	8.7768e-09	4.21815e-06
Contig49041	#N/A	0.565462	24.1973	4.17864	5.79071	7e-09	3.57535e-06
Contig112098	ref|XP_011871397.1| PREDICTED: A disintegrin and metalloproteinase with thrombospondin motifs 18 isoform X1 [Vollenhovia emeryi]	1.81316	24.2147	4.19414	5.77346	7.76595e-09	3.86375e-06
Contig13054	ref|XP_011859191.1| PREDICTED: uncharacterized protein LOC105556710 [Vollenhovia emeryi]	0.896859	24.2164	4.19867	5.76765	8e-09	3.97146e-06
Contig52829	ref|XP_012539445.1| PREDICTED: xenotropic and polytropic retrovirus receptor 1-like isoform X2 [Monomorium pharaonis]	0.428127	24.2266	4.18469	5.78933	7.06694e-09	3.59186e-06
Contig42403	ref|XP_011689564.1| PREDICTED: AN1-type zinc finger protein 2A [Wasmannia auropunctata]	1.19823	24.2464	4.19359	5.78179	7.39106e-09	3.7165e-06
Contig690	#N/A	12.5937	24.3046	4.15981	5.84273	5.13526e-09	2.75892e-06
Contig130289	ref|XP_012227107.1| PREDICTED: LOW QUALITY PROTEIN: uncharacterized protein LOC105674960 [Linepithema humile]	0.653024	24.3091	4.18532	5.80818	6.31556e-09	3.245e-06
Contig63892	#N/A	1.16584	24.3234	3.07854	7.90094	2.76801e-15	2.60741e-11
Contig126530	#N/A	1.82205	24.3259	4.17387	5.82815	5.60466e-09	2.94395e-06
Contig129174	ref|XP_012533032.1| PREDICTED: regulating synaptic membrane exocytosis protein 2 isoform X2 [Monomorium pharaonis]	2.0756	24.3445	4.17498	5.83103	5.5085e-09	2.914e-06
Contig51956	ref|XP_011170764.1| PREDICTED: uncharacterized protein LOC105203618 [Solenopsis invicta]	0.524741	24.3527	4.17381	5.83464	5.39056e-09	2.86342e-06
Contig128685	ref|XP_011175070.1| PREDICTED: craniofacial development protein 2-like [Solenopsis invicta]	0.670379	24.3644	4.17379	5.83747	5.3001e-09	2.826e-06
Contig18321	ref|XP_011879621.1| PREDICTED: voltage-dependent calcium channel type A subunit alpha-1-like isoform X6 [Vollenhovia emeryi]	0.364091	24.394	4.18614	5.82733	5.63207e-09	2.94739e-06
Contig144951	ref|XP_014246261.1| PREDICTED: retrovirus-related Pol polyprotein from transposon TNT 1-94 [Cimex lectularius]	0.211374	24.3947	4.18719	5.82604	5.67576e-09	2.94841e-06
Contig55533	#N/A	0.227081	24.4089	4.19532	5.81813	6e-09	3.06883e-06
Contig86329	ref|XP_011882453.1| PREDICTED: uncharacterized protein LOC105570099 [Vollenhovia emeryi]	1.58232	24.4418	2.50387	9.7616	1.64541e-22	7.74971e-18
Contig71088	#N/A	0.281829	24.4437	4.1924	5.83047	5.52709e-09	2.914e-06
Contig109882	ref|XP_011866622.1| PREDICTED: DNA topoisomerase 2 isoform X2 [Vollenhovia emeryi]	4.22997	24.4568	4.16793	5.86785	4.41474e-09	2.44623e-06
Contig130896	ref|XP_012552318.1| PREDICTED: uncharacterized protein LOC105842679 [Bombyx mori]	0.467706	24.486	4.18041	5.85731	4.70431e-09	2.57638e-06
Contig104179	#N/A	0.345516	24.5006	4.18562	5.85351	4.81304e-09	2.61565e-06
Contig106630	#N/A	0.332196	24.5063	4.18755	5.85219	4.85142e-09	2.6264e-06
Contig116271	ref|XP_011638968.1| PREDICTED: palmitoyltransferase ZDHHC3 isoform X1 [Pogonomyrmex barbatus]	1.44182	24.522	4.17229	5.87735	4.16874e-09	2.33742e-06
Contig50230	ref|XP_011881997.1| PREDICTED: thyrotropin-releasing hormone-degrading ectoenzyme-like [Vollenhovia emeryi]	3.55085	24.5887	3.56111	6.90478	5.02821e-12	7.7225e-09
Contig143846	ref|XP_011883140.1| PREDICTED: uncharacterized protein LOC105570507 [Vollenhovia emeryi]	0.694678	24.5975	4.17728	5.88839	3.89972e-09	2.24905e-06
Contig84077	ref|XP_011066196.1| PREDICTED: uncharacterized protein LOC105153184 [Acromyrmex echinatior]	0.26062	24.5979	4.18719	5.87456	4.23975e-09	2.36784e-06
Contig113756	#N/A	0.69025	24.5992	4.18288	5.88091	4.08028e-09	2.31538e-06
Contig131757	#N/A	0.431554	24.6101	4.17869	5.88943	3.87541e-09	2.24905e-06
Contig115508	#N/A	0.380166	24.6428	4.18492	5.88849	3.89743e-09	2.24905e-06
Contig126217	#N/A	0.230299	24.6444	4.18621	5.88705	3.93161e-09	2.25823e-06
Contig135925	#N/A	0.309651	24.648	4.19301	5.87834	4.14395e-09	2.33278e-06
Contig96591	#N/A	2.00606	24.6559	3.13582	7.86266	3.76066e-15	3.12571e-11
Contig144442	#N/A	0.418412	24.6709	4.18636	5.89316	3.78868e-09	2.23054e-06
Contig74251	ref|XP_011162439.1| PREDICTED: regulatory protein MIG1-like [Solenopsis invicta]	1.35673	24.6853	4.1982	5.87997	4.10329e-09	2.31913e-06
Contig147953	ref|XP_012535774.1| PREDICTED: putative inorganic phosphate cotransporter [Monomorium pharaonis]	3.62147	24.7304	2.83769	8.71497	2.90826e-18	5.1366e-14
Contig105643	ref|XP_014209289.1| PREDICTED: uncharacterized protein LOC106639961 [Copidosoma floridanum]	0.655969	24.7419	4.17963	5.91963	3.22667e-09	1.93186e-06
Contig61013	ref|XP_011875539.1| PREDICTED: U2 snRNP-associated SURP motif-containing protein isoform X3 [Vollenhovia emeryi]	0.67674	24.7438	4.17631	5.92479	3.12698e-09	1.90445e-06
Contig68229	#N/A	0.392796	24.7492	4.1846	5.91435	3.3318e-09	1.978e-06
Contig106736	ref|XP_011066922.1| PREDICTED: uncharacterized protein LOC105153653 [Acromyrmex echinatior]	0.819793	24.768	4.17303	5.93526	2.93372e-09	1.81809e-06
Contig115977	#N/A	0.304795	24.8022	4.18598	5.92505	3.12199e-09	1.90445e-06
Contig2799	#N/A	1.88706	24.8252	4.17653	5.94396	2.78212e-09	1.75493e-06
Contig138312	#N/A	0.433758	24.8504	4.18566	5.93703	2.9023e-09	1.81173e-06
Contig15984	ref|XP_012539622.1| PREDICTED: tubulin epsilon chain-like isoform X2 [Monomorium pharaonis]	0.789742	24.8782	4.18368	5.94647	2.73985e-09	1.736e-06
Contig94887	ref|XP_011175625.1| PREDICTED: protein arginine N-methyltransferase 7 [Solenopsis invicta]	10.0388	24.8835	4.198	5.92747	3.07632e-09	1.88989e-06
Contig89927	ref|XP_011696005.1| PREDICTED: peptide-N(4)-(N-acetyl-beta-glucosaminyl)asparagine amidase [Wasmannia auropunctata]	1.17425	24.8873	3.01877	8.24419	1.66278e-16	2.34946e-12
Contig73264	ref|XP_011058726.1| PREDICTED: transmembrane protein 39A isoform X2 [Acromyrmex echinatior]	0.738451	24.8961	4.1835	5.95101	2.66487e-09	1.69611e-06
Contig132560	#N/A	0.264476	24.9091	4.19588	5.93656	2.91062e-09	1.81173e-06
Contig96026	#N/A	1.22829	24.9263	4.16646	5.98261	2.19596e-09	1.42987e-06
Contig137296	ref|XP_011879569.1| PREDICTED: uncharacterized protein LOC105568477 isoform X1 [Vollenhovia emeryi]	0.882415	24.9423	4.18324	5.96244	2.48493e-09	1.589e-06
Contig116632	ref|XP_015588059.1| PREDICTED: knirps-related protein-like isoform X1 [Cephus cinctus]	1.21644	24.9801	4.18457	5.96957	2.37884e-09	1.53481e-06
Contig122791	ref|XP_011863149.1| PREDICTED: uncharacterized protein LOC105559464 [Vollenhovia emeryi]	0.4632	24.9877	4.17785	5.981	2.21777e-09	1.43745e-06
Contig119377	#N/A	0.261289	25.0879	4.18658	5.99246	2.06684e-09	1.35256e-06
Contig132912	ref|XP_011686750.1| PREDICTED: POC1 centriolar protein homolog A-like isoform X1 [Wasmannia auropunctata]	0.440791	25.0924	4.18443	5.9966	2e-09	1.33034e-06
Contig115879	ref|XP_011156130.1| PREDICTED: epidermal growth factor receptor-like [Solenopsis invicta]	1.15823	25.0976	2.94417	8.52449	1.53487e-17	2.40969e-13
Contig119928	ref|XP_011064563.1| PREDICTED: kinesin-like protein KIF16B isoform X1 [Acromyrmex echinatior]	0.54814	25.1716	4.184	6.01616	1.78606e-09	1.18991e-06
Contig97190	ref|XP_011691843.1| PREDICTED: protein CIP2A isoform X2 [Wasmannia auropunctata]	16.9237	25.2079	4.19052	6.01546	1.79375e-09	1.18991e-06
Contig104510	#N/A	0.407284	25.2539	4.18653	6.03219	1.61753e-09	1.09355e-06
Contig141442	ref|XP_014477733.1| PREDICTED: cyclin-dependent kinase 10 isoform X2 [Dinoponera quadriceps]	1.79541	25.2551	4.05144	6.2336	4.55825e-10	3.81105e-07
Contig74599	ref|XP_012526170.1| PREDICTED: alpha-1,6-mannosyl-glycoprotein 2-beta-N-acetylglucosaminyltransferase isoform X2 [Monomorium pharaonis]	2.13689	25.2563	4.17536	6.04888	1.45858e-09	1.00533e-06
Contig104762	ref|XP_012524115.1| PREDICTED: uncharacterized protein LOC105829641 [Monomorium pharaonis]	0.74385	25.2899	4.18499	6.04301	1.51269e-09	1.03756e-06
Contig66472	ref|XP_011879931.1| PREDICTED: glutamate receptor ionotropic, kainate 2-like [Vollenhovia emeryi]	1.36939	25.3278	4.19304	6.04042	1.53709e-09	1.04921e-06
Contig133821	#N/A	0.229199	25.3518	4.18821	6.05314	1.42046e-09	9.88706e-07
Contig103500	ref|XP_011705104.1| PREDICTED: uncharacterized protein LOC105460357 [Wasmannia auropunctata]	0.189504	25.4386	4.19544	6.0634	1.33272e-09	9.32226e-07
Contig105543	#N/A	0.189504	25.4386	4.19544	6.0634	1.33272e-09	9.32226e-07
Contig92159	#N/A	0.209181	25.4855	4.18825	6.085	1.1649e-09	8.39778e-07
Contig105024	#N/A	1.62589	25.4941	4.19819	6.07265	1.2582e-09	8.93369e-07
Contig130322	#N/A	0.169625	25.5116	4.19585	6.08021	1.20027e-09	8.56537e-07
Contig45912	#N/A	0.169625	25.5116	4.19585	6.08021	1.20027e-09	8.56537e-07
Contig54047	#N/A	0.240377	25.6035	4.19002	6.11059	1e-09	7.30481e-07
Contig133666	ref|XP_011175070.1| PREDICTED: craniofacial development protein 2-like [Solenopsis invicta]	0.269249	25.7457	4.18715	6.14874	7.81006e-10	5.933e-07
Contig91609	ref|XP_011703131.1| PREDICTED: frataxin homolog, mitochondrial [Wasmannia auropunctata]	0.713022	25.7565	4.19958	6.13311	8.61801e-10	6.40894e-07
Contig100731	ref|XP_011869979.1| PREDICTED: type-1 angiotensin II receptor-associated protein isoform X2 [Vollenhovia emeryi]	0.660359	25.7638	4.18323	6.15884	7.32793e-10	5.62725e-07
Contig139165	#N/A	0.239419	25.7665	4.19415	6.14344	8.07513e-10	6.0691e-07
Contig140457	#N/A	0.239419	25.7665	4.19415	6.14344	8.07513e-10	6.0691e-07
Contig82190	#N/A	1.1193	25.7937	4.18739	6.15984	7.28172e-10	5.62232e-07
Contig16247	ref|XP_011860974.1| PREDICTED: beta-1,4-glucuronyltransferase 1-like [Vollenhovia emeryi]	1.87398	25.8099	4.17536	6.18149	6.34982e-10	5.09779e-07
Contig139506	#N/A	0.432748	25.8909	4.19477	6.17219	6.73508e-10	5.25771e-07
Contig122465	#N/A	0.159467	25.9119	4.19744	6.17327	6.68929e-10	5.25419e-07
Contig136743	#N/A	0.159467	25.9119	4.19744	6.17327	6.68929e-10	5.25419e-07
Contig105787	ref|XP_011646738.1| PREDICTED: RNA-directed DNA polymerase from mobile element jockey-like [Pogonomyrmex barbatus]	8.39421	25.9145	4.19793	6.17317	6.69338e-10	5.25419e-07
Contig120688	#N/A	0.313542	25.9471	4.18622	6.19821	5.7109e-10	4.66436e-07
Contig149793	ref|XP_011692179.1| PREDICTED: tectonin beta-propeller repeat-containing protein isoform X1 [Wasmannia auropunctata]	5.33546	26.061	4.16827	6.25224	4.04613e-10	3.48601e-07
Contig97502	ref|XP_011691082.1| PREDICTED: Bardet-Biedl syndrome 1 protein isoform X1 [Wasmannia auropunctata]	0.547768	26.0655	4.18432	6.22934	4.68404e-10	3.89318e-07
Contig66948	ref|XP_011877076.1| PREDICTED: uncharacterized protein LOC105567114 isoform X1 [Vollenhovia emeryi]	1.67805	26.1556	4.1771	6.26167	3.80879e-10	3.34268e-07
Contig59572	ref|XP_011858256.1| PREDICTED: probable cytochrome P450 4p3 [Vollenhovia emeryi]	0.354055	26.1666	4.18173	6.25736	3.91542e-10	3.39409e-07
Contig22242	#N/A	0.192496	26.1847	4.19445	6.24269	4.30111e-10	3.65438e-07
Contig101747	#N/A	0.179346	26.1948	4.19714	6.2411	4.345e-10	3.65438e-07
Contig132093	#N/A	0.179346	26.1948	4.19714	6.2411	4.345e-10	3.65438e-07
Contig139670	#N/A	0.179346	26.1948	4.19714	6.2411	4.345e-10	3.65438e-07
Contig37875	ref|XP_015121222.1| PREDICTED: uncharacterized protein LOC107044011 [Diachasma alloeum]	21.8184	26.2264	4.19057	6.25842	3.88894e-10	3.39195e-07
Contig56086	#N/A	0.746804	26.2313	4.17894	6.27703	3.45107e-10	3.12581e-07
Contig92927	ref|XP_011870938.1| PREDICTED: uncharacterized protein KIAA1109 isoform X5 [Vollenhovia emeryi]	4.28132	26.2658	4.17508	6.2911	3.15232e-10	2.93e-07
Contig37857	ref|XP_011056923.1| PREDICTED: inhibitor of nuclear factor kappa-B kinase subunit beta-like isoform X1 [Acromyrmex echinatior]	0.566664	26.2817	4.1845	6.28072	3.37002e-10	3.09204e-07
Contig149191	#N/A	0.512573	26.345	4.18452	6.29582	3.05772e-10	2.86124e-07
Contig133921	ref|XP_011872126.1| PREDICTED: uncharacterized protein LOC105564406 isoform X1 [Vollenhovia emeryi]	0.798821	26.4756	4.17044	6.34839	2.17575e-10	2.13491e-07
Contig146030	#N/A	0.236495	26.5759	4.19382	6.33691	2.34411e-10	2.27445e-07
Contig9923	#N/A	0.491297	26.6456	4.17883	6.37632	1.8139e-10	1.7923e-07
Contig137031	ref|XP_012056000.1| PREDICTED: sodium- and chloride-dependent GABA transporter 1 [Atta cephalotes]	1.07527	26.6883	4.18307	6.38008	1.76996e-10	1.76119e-07
Contig134953	ref|XP_011631748.1| PREDICTED: anoctamin-4 [Pogonomyrmex barbatus]	0.507975	26.7586	4.19303	6.38169	1.75141e-10	1.7551e-07
Contig121255	ref|XP_011861842.1| PREDICTED: transmembrane and TPR repeat-containing protein 4 isoform X1 [Vollenhovia emeryi]	4.5548	26.828	4.1749	6.42602	1.30987e-10	1.36089e-07
Contig141166	ref|XP_011693188.1| PREDICTED: E3 ubiquitin-protein ligase NEDD4 isoform X3 [Wasmannia auropunctata]	3.25606	26.8372	4.19808	6.39273	1.62951e-10	1.6446e-07
Contig68492	#N/A	0.602529	26.9341	4.1902	6.42787	1.29403e-10	1.35439e-07
Contig97816	#N/A	5.85551	26.9518	4.17474	6.45593	1.0756e-10	1.16929e-07
Contig72432	ref|XP_011875667.1| PREDICTED: DNA repair and recombination protein RAD54B-like isoform X3 [Vollenhovia emeryi]	0.795533	26.9559	4.1856	6.44016	1.19351e-10	1.28615e-07
Contig62766	#N/A	0.399084	26.9757	4.17845	6.4559	1.0758e-10	1.16929e-07
Contig104289	#N/A	0.345184	26.9899	4.17993	6.45702	1.06788e-10	1.16929e-07
Contig9838	ref|XP_015378351.1| PREDICTED: uncharacterized protein LOC107172574 [Diuraphis noxia]	1.67405	27.1069	4.17533	6.49216	8.46154e-11	9.56472e-08
Contig46906	ref|XP_011883916.1| PREDICTED: uncharacterized protein LOC105571054 isoform X2 [Vollenhovia emeryi]	1.87848	27.2417	4.17607	6.52329	6.8782e-11	7.9e-08
Contig119477	ref|XP_013196887.1| PREDICTED: polyubiquitin, partial [Amyelois transitella]	0.31601	27.3564	4.2	6.51342	7.34582e-11	8.3705e-08
Contig104214	ref|XP_011866029.1| PREDICTED: dynein beta chain, ciliary [Vollenhovia emeryi]	1.28702	27.3812	4.17608	6.55667	5.50209e-11	6.37237e-08
Contig69591	ref|XP_011065034.1| PREDICTED: cytochrome P450 9e2-like [Acromyrmex echinatior]	0.31303	27.4135	4.17887	6.56003	5.37959e-11	6.28199e-08
Contig32843	#N/A	0.450628	27.4647	4.18627	6.56067	5.35663e-11	6.28199e-08
Contig68613	ref|XP_012055196.1| PREDICTED: mitochondrial ribosome-associated GTPase 2 [Atta cephalotes]	1.66737	27.5438	2.623	10.5009	8.55991e-26	8.26265e-21
Contig48233	ref|XP_011858511.1| PREDICTED: putative nuclease HARBI1 isoform X5 [Vollenhovia emeryi]	1.12559	27.5506	4.18284	6.58659	4.50057e-11	5.38913e-08
Contig137306	ref|XP_012522436.1| PREDICTED: glycerol-3-phosphate dehydrogenase [NAD(+)], cytoplasmic-like isoform X2 [Monomorium pharaonis]	1.32651	27.6043	4.18271	6.59963	4.12191e-11	4.9779e-08
Contig60825	#N/A	0.744497	27.8704	3.72199	7.48804	6.99118e-14	4.70397e-10
Contig131089	ref|XP_011644821.1| PREDICTED: transcription factor Sox-2-like isoform X4 [Pogonomyrmex barbatus]	0.724593	27.8814	3.16347	8.81354	1.21257e-18	2.4476e-14
Contig137028	ref|XP_011058460.1| PREDICTED: sodium- and chloride-dependent GABA transporter 1 isoform X2 [Acromyrmex echinatior]	1.28857	28.1332	4.18398	6.72401	1.76789e-11	2.1912e-08
Contig87838	ref|XP_012061274.1| PREDICTED: ribosomal protein S6 kinase 2 beta [Atta cephalotes]	1.1928	28.1429	4.18513	6.72449	1.76209e-11	2.1912e-08
Contig61132	ref|XP_011874240.1| PREDICTED: solute carrier family 12 member 7 isoform X1 [Vollenhovia emeryi]	4.05438	28.3808	3.88774	7.30008	2.87591e-13	1.76677e-09
Contig126924	ref|XP_011695227.1| PREDICTED: bifunctional heparan sulfate N-deacetylase/N-sulfotransferase [Wasmannia auropunctata]	2.81748	28.4299	4.19843	6.77154	1.27415e-11	1.63667e-08
Contig26978	ref|XP_015438108.1| PREDICTED: uncharacterized protein LOC107193217, partial [Dufourea novaeangliae]	7.14067	28.5057	4.18279	6.81501	9.42549e-12	1.24467e-08
Contig81105	#N/A	0.769367	28.5314	4.17823	6.82858	8.57574e-12	1.16512e-08
Contig45479	ref|XP_011173391.1| PREDICTED: probable cytochrome P450 6a13 [Solenopsis invicta]	1.56931	28.5443	4.18485	6.82088	9.04827e-12	1.20613e-08
Contig74628	ref|XP_011051793.1| PREDICTED: probable GPI-anchored adhesin-like protein PGA55 isoform X2 [Acromyrmex echinatior]	1.41932	28.5618	4.1764	6.83886	7.9825e-12	1.1e-08
Contig72762	ref|XP_012533484.1| PREDICTED: histone-lysine N-methyltransferase E(z) isoform X1 [Monomorium pharaonis]	3.1956	28.6636	4.17641	6.86321	6.73287e-12	9.51334e-09
Contig67857	ref|XP_011858612.1| PREDICTED: putative nuclease HARBI1 isoform X1 [Vollenhovia emeryi]	15.2117	28.7438	4.17472	6.88521	5.77016e-12	8.49277e-09
Contig36039	ref|XP_011701811.1| PREDICTED: exportin-4-like isoform X1 [Wasmannia auropunctata]	3.02444	28.7579	4.18343	6.87423	6.23263e-12	9.07889e-09
Contig143527	ref|XP_011689749.1| PREDICTED: sodium channel protein para [Wasmannia auropunctata]	2.58933	28.7654	4.18854	6.86764	6.52727e-12	9.41106e-09
Contig48324	ref|XP_012057922.1| PREDICTED: uncharacterized protein LOC105621060 [Atta cephalotes]	0.217708	28.7704	4.20209	6.84669	7.55796e-12	1.04698e-08
Contig54560	ref|XP_011859678.1| PREDICTED: DNA excision repair protein ERCC-1 [Vollenhovia emeryi]	0.669805	28.7817	4.19298	6.86427	6.68333e-12	9.51334e-09
Contig33859	#N/A	0.241975	28.7824	4.20208	6.84956	7.40758e-12	1.03631e-08
Contig109536	ref|XP_014485513.1| PREDICTED: LOW QUALITY PROTEIN: collagen alpha-1(II) chain-like [Dinoponera quadriceps]	1.24863	28.8324	4.18369	6.89162	5.51604e-12	8.29149e-09
Contig105290	ref|XP_011707950.1| PREDICTED: uncharacterized protein LOC105462798 [Wasmannia auropunctata]	0.511564	28.9176	4.19293	6.89675	5.32075e-12	8.08393e-09
Contig55745	ref|XP_011880143.1| PREDICTED: stress response protein NST1-like isoform X9 [Vollenhovia emeryi]	0.700949	29.0322	4.17774	6.94928	3.67161e-12	5.89532e-09
Contig34273	ref|XP_012523787.1| PREDICTED: ATP-binding cassette sub-family G member 4 [Monomorium pharaonis]	4.53959	29.0707	3.61851	8.03389	9.44297e-16	1.02636e-11
Contig146447	#N/A	0.207971	29.1702	4.20596	6.93545	4.04942e-12	6.35745e-09
Contig141627	#N/A	0.484945	29.1722	4.1739	6.98919	2.76477e-12	4.88317e-09
Contig82032	#N/A	0.335232	29.1815	4.20209	6.94453	3.79725e-12	6e-09
Contig149653	ref|XP_011640702.1| PREDICTED: tubulin polyglutamylase TTLL5 isoform X2 [Pogonomyrmex barbatus]	1.66926	29.1924	4.18302	6.97879	2.97739e-12	5.06911e-09
Contig25133	ref|XP_015523959.1| PREDICTED: uncharacterized protein LOC107227357 [Neodiprion lecontei]	0.572625	29.1988	4.19676	6.95748	3.46423e-12	5.62626e-09
Contig105810	ref|XP_011868062.1| PREDICTED: transient receptor potential-gamma protein isoform X2 [Vollenhovia emeryi]	1.4655	29.2018	4.16988	7.00303	2.5049e-12	4.88317e-09
Contig95250	ref|XP_011694694.1| PREDICTED: soluble guanylate cyclase 88E [Wasmannia auropunctata]	1.1179	29.2093	4.1768	6.99322	2.6864e-12	4.88317e-09
Contig61320	ref|XP_011065370.1| PREDICTED: coiled-coil domain-containing protein 142 [Acromyrmex echinatior]	0.340056	29.2327	4.20001	6.96017	3.39869e-12	5.62566e-09
Contig127542	ref|XP_011866150.1| PREDICTED: putative serine protease K12H4.7 [Vollenhovia emeryi]	0.424151	29.2332	4.2007	6.95912	3.42404e-12	5.62566e-09
Contig46907	ref|XP_011883915.1| PREDICTED: uncharacterized protein LOC105571054 isoform X1 [Vollenhovia emeryi]	1.5551	29.2453	4.18364	6.99039	2.74131e-12	4.88317e-09
Contig54230	ref|XP_011865391.1| PREDICTED: uncharacterized protein KIAA0556-like isoform X1 [Vollenhovia emeryi]	2.54114	29.2567	4.1853	6.99035	2.74202e-12	4.88317e-09
Contig75149	ref|XP_011174930.1| PREDICTED: uncharacterized protein LOC105207195, partial [Solenopsis invicta]	0.347001	29.2992	4.2007	6.97484	3.06219e-12	5.15094e-09
Contig85073	ref|XP_011859609.1| PREDICTED: uncharacterized protein LOC105557074 [Vollenhovia emeryi]	0.220541	29.3157	4.2007	6.97877	2.97767e-12	5.06911e-09
Contig36970	ref|XP_011159419.1| PREDICTED: pleiotropic regulator 1 [Solenopsis invicta]	2.78717	29.3438	4.17618	7.02648	2.11808e-12	4.40116e-09
Contig51009	#N/A	0.370832	29.3548	4.19959	6.98994	2.75012e-12	4.88317e-09
Contig71584	ref|XP_011687046.1| PREDICTED: zinc finger protein 808-like [Wasmannia auropunctata]	0.356332	29.3643	4.2007	6.99034	2.74222e-12	4.88317e-09
Contig49805	ref|XP_011866663.1| PREDICTED: uncharacterized protein LOC105561363 isoform X1 [Vollenhovia emeryi]	2.88801	29.37	4.18266	7.02185	2.18956e-12	4.47665e-09
Contig19402	ref|XP_012224753.1| PREDICTED: LOW QUALITY PROTEIN: transcription factor IIIB 90 kDa subunit [Linepithema humile]	0.572393	29.3743	4.19958	6.99456	2.66084e-12	4.88317e-09
Contig88694	ref|XP_011881241.1| PREDICTED: constitutive coactivator of PPAR-gamma-like protein 1 homolog isoform X2 [Vollenhovia emeryi]	0.640113	29.376	4.18458	7.02006	2.21778e-12	4.47665e-09
Contig49657	#N/A	0.317028	29.4246	4.20596	6.99593	2.635e-12	4.88317e-09
Contig65019	ref|XP_011878696.1| PREDICTED: protein unc-13 homolog D isoform X8 [Vollenhovia emeryi]	0.381887	29.4282	4.19545	7.01431	2.31084e-12	4.59879e-09
Contig139439	ref|XP_011161679.1| PREDICTED: sodium-coupled monocarboxylate transporter 1-like isoform X2 [Solenopsis invicta]	1.30128	29.5255	4.18312	7.05824	1.68622e-12	3.66551e-09
Contig37902	ref|XP_011871053.1| PREDICTED: nitrate reductase [NADH] isoform X1 [Vollenhovia emeryi]	0.505877	29.5363	4.19168	7.04642	1.83582e-12	3.93024e-09
Contig41383	ref|XP_011871770.1| PREDICTED: Hermansky-Pudlak syndrome 1 protein homolog isoform X1 [Vollenhovia emeryi]	0.815015	29.5672	4.19843	7.04243	1.8892e-12	4e-09
Contig60205	ref|XP_015512049.1| PREDICTED: uncharacterized protein LOC107218636 [Neodiprion lecontei]	0.903943	29.6293	4.18035	7.08776	1.36296e-12	3.15708e-09
Contig65982	ref|XP_011873888.1| PREDICTED: thyrotropin-releasing hormone receptor-like isoform X2 [Vollenhovia emeryi]	5.6933	29.6295	4.17464	7.0975	1.27035e-12	3e-09
Contig77478	ref|XP_012234412.1| PREDICTED: cysteine-rich hydrophobic domain-containing protein 2 [Linepithema humile]	1.43107	29.6398	4.19855	7.05952	1.67073e-12	3.66551e-09
Contig61936	ref|XP_011170893.1| PREDICTED: SCAN domain-containing protein 3-like [Solenopsis invicta]	0.700878	29.6935	4.19867	7.07212	1.52587e-12	3.42223e-09
Contig83545	ref|XP_012522205.1| PREDICTED: 40S ribosomal protein S9 [Monomorium pharaonis]	0.857464	29.7046	4.19931	7.0737	1.50851e-12	3.42223e-09
Contig32208	ref|XP_011644516.1| PREDICTED: splicing factor 1 [Pogonomyrmex barbatus]	2.42867	29.7906	4.18116	7.12496	1.04112e-12	2.49335e-09
Contig135166	ref|XP_012539411.1| PREDICTED: uncharacterized protein LOC105838413 [Monomorium pharaonis]	1.05803	29.8185	4.16318	7.16244	7.9255e-13	2.28818e-09
Contig41529	#N/A	0.570515	29.9036	4.18937	7.13798	9.47134e-13	2.40033e-09
Contig40662	#N/A	0.615519	29.9218	4.17746	7.16267	7.91221e-13	2.28818e-09
Contig3007	#N/A	0.850415	29.9444	4.17534	7.17173	7.40579e-13	2.28818e-09
Contig110440	ref|XP_011158109.1| PREDICTED: LOW QUALITY PROTEIN: uncharacterized protein LOC105194736 [Solenopsis invicta]	4.37972	29.9514	4.16728	7.18726	6.61031e-13	2.28818e-09
Contig93024	ref|XP_011862134.1| PREDICTED: xaa-Pro aminopeptidase 1-like [Vollenhovia emeryi]	0.269618	29.9576	4.19337	7.14403	9.06358e-13	2.37159e-09
Contig85700	ref|XP_012537230.1| PREDICTED: myelin expression factor 2-like isoform X1 [Monomorium pharaonis]	1.50298	29.9646	4.18311	7.16322	7.88048e-13	2.28818e-09
Contig76519	ref|XP_011881054.1| PREDICTED: uncharacterized protein LOC105569309 [Vollenhovia emeryi]	0.398797	29.9735	4.18486	7.16238	7.92908e-13	2.28818e-09
Contig19429	#N/A	2.02371	29.9761	4.17987	7.17154	7.41612e-13	2.28818e-09
Contig110625	#N/A	1.0559	29.9766	4.16823	7.19169	6.39964e-13	2.28818e-09
Contig98347	ref|XP_011156487.1| PREDICTED: mitotic spindle assembly checkpoint protein MAD2B [Solenopsis invicta]	0.78658	29.978	4.17223	7.18512	6.71498e-13	2.28818e-09
Contig20898	#N/A	0.720929	29.9838	4.1828	7.16836	7.59005e-13	2.28818e-09
Contig45634	ref|XP_011873845.1| PREDICTED: transcription factor SPT20 homolog isoform X2 [Vollenhovia emeryi]	2.03871	29.9931	4.17647	7.18145	6.89775e-13	2.28818e-09
Contig111997	ref|XP_011874806.1| PREDICTED: uncharacterized protein LOC105565871 [Vollenhovia emeryi]	3.14911	29.9963	4.189	7.16073	8.0251e-13	2.28818e-09
Contig147686	ref|XP_011875537.1| PREDICTED: U2 snRNP-associated SURP motif-containing protein isoform X1 [Vollenhovia emeryi]	1.6834	29.9969	4.17623	7.18277	6.83127e-13	2.28818e-09
Contig135540	ref|XP_011168205.1| PREDICTED: villin-1 [Solenopsis invicta]	0.472816	29.997	4.17651	7.1823	6.85502e-13	2.28818e-09
Contig119888	ref|XP_011170369.1| PREDICTED: uncharacterized protein LOC105203292 [Solenopsis invicta]	8.27863	30	4.16359	7.20532	5.79069e-13	2.28818e-09
Contig149794	ref|XP_011692191.1| PREDICTED: tectonin beta-propeller repeat-containing protein isoform X2 [Wasmannia auropunctata]	2.80865	30	4.1829	7.17206	7.38758e-13	2.28818e-09
Contig80726	ref|XP_011880446.1| PREDICTED: caspase-1-like [Vollenhovia emeryi]	11.4509	30	3.33057	9.00748	2.10848e-19	4.96536e-15

## Sheet: b)
Contig	Annotation	baseMean	log2FoldChange	lfcSE	stat	pvalue	padj
Contig17949	ref|XP_015523501.1| PREDICTED: uncharacterized protein LOC107227008 [Neodiprion lecontei]	2.86015	-30	4.19813	-7.14603	8.93215e-13	2.37159e-09
Contig69729	#N/A	0.742605	-30	4.18357	-7.17091	7.45018e-13	2.28818e-09
Contig97810	ref|XP_011162612.1| PREDICTED: small VCP/p97-interacting protein [Solenopsis invicta]	1.05039	-30	4.19329	-7.15429	8.4107e-13	2.28818e-09
Contig45348	#N/A	0.324049	-29.9996	4.18517	-7.16808	7.60549e-13	2.28818e-09
Contig91636	ref|XP_015438077.1| PREDICTED: RNA-directed DNA polymerase from mobile element jockey-like [Dufourea novaeangliae]	1.85494	-29.9981	4.17512	-7.18496	6.72247e-13	2.28818e-09
Contig45773	#N/A	0.377079	-29.9978	4.18512	-7.16772	7.62547e-13	2.28818e-09
Contig43114	#N/A	0.518879	-29.9962	4.18484	-7.16781	7.62049e-13	2.28818e-09
Contig46655	#N/A	0.269283	-29.9935	4.18719	-7.16314	7.88477e-13	2.28818e-09
Contig146663	ref|XP_006570971.1| PREDICTED: LOW QUALITY PROTEIN: probable tRNA(His) guanylyltransferase [Apis mellifera]	0.789269	-29.9924	4.18065	-7.17409	7.27888e-13	2.28818e-09
Contig53474	ref|XP_011696169.1| PREDICTED: leukotriene A-4 hydrolase [Wasmannia auropunctata]	0.572684	-29.984	4.17467	-7.18237	6.85152e-13	2.28818e-09
Contig118739	#N/A	0.402888	-29.9798	4.20208	-7.13451	9.71328e-13	2.40782e-09
Contig40276	#N/A	0.441386	-29.9791	4.19047	-7.15412	8.42096e-13	2.28818e-09
Contig75161	ref|XP_011066082.1| PREDICTED: homeobox protein Hox-B4 [Acromyrmex echinatior]	0.332808	-29.9757	4.18989	-7.15428	8.41107e-13	2.28818e-09
Contig53911	#N/A	0.341228	-29.9518	4.18314	-7.16012	8.06091e-13	2.28818e-09
Contig57153	#N/A	1.28694	-29.8061	4.17606	-7.13737	9.5132e-13	2.40033e-09
Contig21716	#N/A	901.915	-29.7865	2.84457	-10.4714	1.16954e-25	8.26265e-21
Contig32846	#N/A	0.417544	-28.9108	4.18488	-6.90839	4.90178e-12	7.61107e-09
Contig119262	ref|XP_011883028.1| PREDICTED: centrosomal protein of 135 kDa [Vollenhovia emeryi]	0.901171	-27.7613	4.1993	-6.61094	3.81884e-11	4.65164e-08
Contig33012	#N/A	0.443746	-27.505	4.18661	-6.56975	5.03993e-11	5.98426e-08
Contig60023	ref|XP_012148636.1| PREDICTED: uncharacterized protein LOC105663570, partial [Megachile rotundata]	0.691036	-27.2138	4.19931	-6.48054	9.13925e-11	1.02488e-07
Contig52759	#N/A	0.267372	-27.0797	4.18723	-6.4672	9.98359e-11	1.11075e-07
Contig68166	#N/A	0.316458	-26.8002	4.18532	-6.40339	1.51968e-10	1.55599e-07
Contig36914	#N/A	13.6941	-26.7872	4.04111	-6.62868	3.38703e-11	4.16154e-08
Contig34532	#N/A	0.455955	-26.7867	4.1763	-6.41398	1.41765e-10	1.46212e-07
Contig103257	ref|XP_012534025.1| PREDICTED: growth arrest-specific protein 8 [Monomorium pharaonis]	0.753909	-26.6108	4.19959	-6.33652	2.35015e-10	2.27445e-07
Contig43093	#N/A	1.07437	-26.3019	4.17726	-6.29646	3.04524e-10	2.86124e-07
Contig143529	ref|XP_011689749.1| PREDICTED: sodium channel protein para [Wasmannia auropunctata]	4.22001	-26.2765	4.16922	-6.30249	2.92899e-10	2.79634e-07
Contig30827	ref|XP_014483635.1| PREDICTED: nesprin-1 isoform X7 [Dinoponera quadriceps]	0.787023	-26.2635	4.18342	-6.278	3.4295e-10	3.12581e-07
Contig23044	ref|XP_011170570.1| PREDICTED: glucose dehydrogenase [FAD, quinone]-like [Solenopsis invicta]	0.279006	-26.2623	4.1862	-6.27355	3.52904e-10	3.14585e-07
Contig134393	ref|XP_011173907.1| PREDICTED: uncharacterized protein LOC105206077, partial [Solenopsis invicta]	1.14506	-26.2576	4.17628	-6.28732	3.22988e-10	2.98282e-07
Contig68787	#N/A	0.92781	-26.2571	4.18421	-6.27527	3.49028e-10	3.14119e-07
Contig59801	ref|XP_017128962.1| PREDICTED: nicotinate-nucleotide--dimethylbenzimidazole phosphoribosyltransferase-like [Drosophila elegans]	0.582945	-26.2558	4.18548	-6.27307	3.53999e-10	3.14585e-07
Contig59946	#N/A	1.32459	-26.1767	4.17571	-6.26881	3.63822e-10	3.21294e-07
Contig71117	ref|XP_011881781.1| PREDICTED: RNA binding protein fox-1 homolog 2 isoform X3 [Vollenhovia emeryi]	1.05776	-25.9988	4.17563	-6.22632	4.7752e-10	3.94574e-07
Contig44602	ref|XP_012055168.1| PREDICTED: phosphatidate cytidylyltransferase, photoreceptor-specific [Atta cephalotes]	6.45295	-25.9181	4.19033	-6.18522	6.2014e-10	5.00708e-07
Contig56743	ref|XP_011705409.1| PREDICTED: serine/threonine-protein kinase 11-interacting protein isoform X2 [Wasmannia auropunctata]	2.37743	-25.9153	4.18341	-6.19478	5.83651e-10	4.74e-07
Contig67362	ref|XP_011638658.1| PREDICTED: uncharacterized protein LOC105428197 isoform X2 [Pogonomyrmex barbatus]	0.852076	-25.7687	4.17244	-6.17594	6.57706e-10	5.25e-07
Contig67071	ref|XP_011698950.1| PREDICTED: carboxypeptidase Q-like [Wasmannia auropunctata]	0.479198	-25.7643	4.20001	-6.13435	8.55072e-10	6.39255e-07
Contig98545	#N/A	0.319507	-25.7483	4.1852	-6.15223	7.63998e-10	5.83517e-07
Contig16338	ref|XP_011055914.1| PREDICTED: tryptophan 2,3-dioxygenase isoform X2 [Acromyrmex echinatior]	1.04494	-25.5765	4.18304	-6.11433	1e-09	7.17332e-07
Contig41542	ref|XP_011877585.1| PREDICTED: procollagen-lysine,2-oxoglutarate 5-dioxygenase 3 [Vollenhovia emeryi]	0.71367	-25.4613	4.18074	-6.09016	1.128e-09	8.17352e-07
Contig76544	ref|XP_012214839.1| PREDICTED: putative golgin subfamily A member 6-like protein 6 [Linepithema humile]	0.237842	-25.3837	4.18618	-6.06369	1.33034e-09	9.32226e-07
Contig38561	ref|XP_012248293.1| PREDICTED: ABC transporter H family member 2-like [Bombus impatiens]	0.596853	-25.265	4.18424	-6.03813	1.55909e-09	1.05911e-06
Contig140183	ref|XP_008189586.1| PREDICTED: ATP-dependent DNA helicase PIF1-like [Acyrthosiphon pisum]	0.349674	-25.1887	4.18563	-6.01789	1.76704e-09	1.18331e-06
Contig69901	#N/A	0.338044	-24.8533	4.18567	-5.9377	2.89055e-09	1.81173e-06
Contig128369	#N/A	0.384833	-24.8346	4.18563	-5.93329	3e-09	1.832e-06
Contig43605	#N/A	0.42324	-24.7851	4.18495	-5.92243	3.17224e-09	1.91551e-06
Contig71057	#N/A	0.449626	-24.7831	4.18418	-5.92305	3.1603e-09	1.91551e-06
Contig150061	#N/A	0.42255	-24.7538	4.18482	-5.91513	3.31615e-09	1.97705e-06
Contig76706	#N/A	0.504958	-24.7446	4.17949	-5.92048	3.21002e-09	1.93007e-06
Contig148986	#N/A	0.352442	-24.7394	4.2007	-5.88936	3.87704e-09	2.24905e-06
Contig126373	#N/A	0.349328	-24.6346	4.18656	-5.88421	4e-09	2.28421e-06
Contig141115	ref|XP_011696169.1| PREDICTED: leukotriene A-4 hydrolase [Wasmannia auropunctata]	1.74327	-24.5994	4.17689	-5.88941	3.87585e-09	2.24905e-06
Contig99671	#N/A	0.479404	-24.5527	4.1858	-5.86571	4.47225e-09	2.46842e-06
Contig68550	ref|XP_015596585.1| PREDICTED: uncharacterized protein LOC107268379 [Cephus cinctus]	39.1081	-24.5216	4.1964	-5.84348	5.11217e-09	2.757e-06
Contig137784	#N/A	0.374692	-24.4961	4.18456	-5.85391	4.80136e-09	2.61565e-06
Contig124401	#N/A	0.360128	-24.4413	4.1866	-5.83799	5.28349e-09	2.826e-06
Contig140133	ref|XP_011172194.1| PREDICTED: cholesterol desaturase daf-36 [Solenopsis invicta]	2.76527	-24.4335	4.16126	-5.87166	4.31459e-09	2.40015e-06
Contig88838	ref|XP_011868745.1| PREDICTED: uncharacterized protein LOC105562482 [Vollenhovia emeryi]	0.327085	-24.3682	4.19728	-5.80571	6.40934e-09	3.28123e-06
Contig98641	ref|XP_011168661.1| PREDICTED: tectonin beta-propeller repeat-containing protein isoform X2 [Solenopsis invicta]	2.0656	-24.3274	4.1756	-5.82608	5.67458e-09	2.94841e-06
Contig136406	ref|XP_011874742.1| PREDICTED: uncharacterized protein LOC105565807, partial [Vollenhovia emeryi]	0.287242	-24.1868	4.20209	-5.75591	8.61781e-09	4.15814e-06
Contig76343	#N/A	0.333419	-24.1364	4.18523	-5.76704	8.06761e-09	3.97188e-06
Contig57906	ref|XP_011166588.1| PREDICTED: putative fatty acyl-CoA reductase CG5065 [Solenopsis invicta]	0.372252	-24.106	4.18487	-5.76028	8.39745e-09	4.0915e-06
Contig112319	ref|XP_011640611.1| PREDICTED: protein unc-45 homolog B isoform X1 [Pogonomyrmex barbatus]	0.311344	-24.0453	4.18989	-5.73889	9.53013e-09	4.48859e-06
Contig57789	ref|XP_011686422.1| PREDICTED: uncharacterized protein LOC105449120 [Wasmannia auropunctata]	4.89952	-23.9074	4.17747	-5.72292	1.04706e-08	4.86664e-06
Contig113834	ref|XP_012216703.1| PREDICTED: C-1-tetrahydrofolate synthase, cytoplasmic [Linepithema humile]	0.344903	-23.8575	4.18533	-5.70027	1.2e-08	5.38268e-06
Contig120165	#N/A	0.526878	-23.7456	4.19412	-5.66165	1.5e-08	6.4388e-06
Contig81768	#N/A	0.485031	-23.727	4.1842	-5.67061	1.42293e-08	6.20287e-06
Contig76723	ref|XP_011702375.1| PREDICTED: protein SPT2 homolog isoform X2 [Wasmannia auropunctata]	2.22788	-23.7179	4.17533	-5.68048	1.34317e-08	5.96811e-06
Contig144925	ref|XP_011159727.1| PREDICTED: DNA polymerase zeta catalytic subunit [Solenopsis invicta]	0.218796	-23.5599	4.20208	-5.60673	2.06187e-08	8.46907e-06
Contig148266	ref|XP_011870333.1| PREDICTED: exonuclease mut-7 homolog isoform X1 [Vollenhovia emeryi]	3.224	-23.5515	3.8552	-6.10902	1e-09	7.33906e-07
Contig113375	ref|XP_012137361.1| PREDICTED: uncharacterized protein LOC105662063 [Megachile rotundata]	0.257254	-23.5484	4.20208	-5.60398	2.09488e-08	8.50577e-06
Contig146849	ref|XP_011050387.1| PREDICTED: putative uncharacterized protein DDB_G0282133 [Acromyrmex echinatior]	1.05333	-23.5321	4.18084	-5.62856	1.81723e-08	7.64193e-06
Contig92656	ref|XP_013413968.1| PREDICTED: LOW QUALITY PROTEIN: catalase-like [Lingula anatina]	4.84734	-23.5214	4.174	-5.6352	1.74855e-08	7.37507e-06
Contig113828	#N/A	0.229912	-23.5207	4.18678	-5.61786	1.93341e-08	8.01131e-06
Contig61726	#N/A	1.80554	-23.4715	4.03322	-5.81954	5.90095e-09	3.05416e-06
Contig136577	ref|XP_012064383.1| PREDICTED: TATA box-binding protein-like protein 1 [Atta cephalotes]	1.15202	-23.4253	4.1846	-5.59797	2.16871e-08	8.68079e-06
Contig108138	#N/A	0.319358	-23.3873	4.18623	-5.58673	2.31391e-08	9.15359e-06
Contig80424	#N/A	2.68939	-23.375	4.16177	-5.61661	1.94736e-08	8.04549e-06
Contig84744	ref|XP_011052524.1| PREDICTED: activating signal cointegrator 1 complex subunit 1 isoform X1 [Acromyrmex echinatior]	1.0932	-23.3564	4.18454	-5.5816	2.38316e-08	9.36454e-06
Contig33376	ref|XP_011705674.1| PREDICTED: transmembrane protein 43 homolog isoform X1 [Wasmannia auropunctata]	25.9168	-23.2441	2.95009	-7.87912	3.29706e-15	2.91165e-11
Contig97832	ref|XP_011702118.1| PREDICTED: COMM domain-containing protein 8-like [Wasmannia auropunctata]	2.18976	-23.1967	4.16682	-5.56699	2.59178e-08	9.92442e-06
Contig104447	#N/A	0.32172	-23.1818	4.18759	-5.53585	3.1e-08	1.13967e-05
Contig73798	ref|XP_011165969.1| PREDICTED: cohesin subunit SA-2-like [Solenopsis invicta]	1.61843	-23.1147	4.16949	-5.54378	2.96009e-08	1.10357e-05
Contig17532	ref|XP_011169209.1| PREDICTED: kinesin-like protein Klp10A isoform X3 [Solenopsis invicta]	1.6592	-23.0665	4.17771	-5.52133	3.36441e-08	1.22521e-05
Contig133826	#N/A	0.247479	-22.963	4.18931	-5.48133	4.22135e-08	1.45479e-05
Contig102497	ref|XP_015523501.1| PREDICTED: uncharacterized protein LOC107227008 [Neodiprion lecontei]	10.3652	-22.9559	4.18224	-5.48889	4.04458e-08	1.4076e-05
Contig84836	#N/A	0.250954	-22.6631	4.18628	-5.41368	6.1744e-08	1.9963e-05
Contig92334	ref|XP_012542927.1| PREDICTED: branched-chain-amino-acid aminotransferase 5, chloroplastic-like, partial [Monomorium pharaonis]	0.573751	-22.6395	4.18316	-5.41205	6.23067e-08	2.00541e-05
Contig126248	#N/A	0.448489	-22.6338	4.18959	-5.40239	6.57578e-08	2.09265e-05
Contig89045	ref|XP_011565640.1| PREDICTED: uncharacterized protein LOC105395382 [Plutella xylostella]	0.693585	-22.6298	4.18494	-5.40743	6.39341e-08	2.04846e-05
Contig61491	ref|XP_017023551.1| PREDICTED: cyclopentanol dehydrogenase-like [Drosophila kikkawai]	0.979419	-22.6179	4.17778	-5.41386	6.16818e-08	1.9963e-05
Contig134630	ref|XP_011704506.1| PREDICTED: uncharacterized protein LOC105459867 [Wasmannia auropunctata]	17.82	-22.6076	4.16146	-5.43261	5.55349e-08	1.85506e-05
Contig91452	ref|XP_012525761.1| PREDICTED: origin recognition complex subunit 3 isoform X2 [Monomorium pharaonis]	5.08051	-22.5315	4.1605	-5.41559	6.1088e-08	1.98884e-05
Contig28364	ref|XP_011879837.1| PREDICTED: peptidylprolyl isomerase domain and WD repeat-containing protein 1 [Vollenhovia emeryi]	5.86433	-22.5171	4.16739	-5.40317	6.54733e-08	2.0883e-05
Contig51341	#N/A	0.95505	-22.4745	4.18251	-5.37345	7.72422e-08	2.38299e-05
Contig104520	ref|XP_011686585.1| PREDICTED: longitudinals lacking protein, isoforms H/M/V isoform X20 [Wasmannia auropunctata]	0.934251	-22.4257	4.1766	-5.36936	7.9e-08	2.43243e-05
Contig39457	#N/A	0.583803	-22.3804	4.17438	-5.36135	8.26003e-08	2.51534e-05
Contig87331	#N/A	0.537971	-22.3794	4.18441	-5.34827	8.87971e-08	2.65821e-05
Contig147468	#N/A	0.466073	-22.3775	4.18692	-5.34462	9.06045e-08	2.68389e-05
Contig139974	ref|XP_011696328.1| PREDICTED: glutamate receptor ionotropic, kainate 2-like isoform X3 [Wasmannia auropunctata]	3.22373	-22.3263	4.16845	-5.35602	8.50753e-08	2.57407e-05
Contig48160	#N/A	0.82853	-22.268	4.18432	-5.32176	1.02766e-07	2.97553e-05
Contig63237	ref|XP_011049392.1| PREDICTED: pyroglutamylated RFamide peptide receptor-like isoform X1 [Acromyrmex echinatior]	0.920593	-22.2242	4.17761	-5.31983	1.03866e-07	3.00121e-05
Contig22269	#N/A	0.431018	-22.1912	4.18184	-5.30657	1.1171e-07	3.18875e-05
Contig130324	#N/A	0.179911	-22.1873	4.19016	-5.2951	1.19e-07	3.36154e-05
Contig97879	#N/A	54.4951	-22.1668	3.44251	-6.43914	1.20153e-10	1.28615e-07
Contig119254	#N/A	0.839144	-22.1385	4.17438	-5.30342	1.13655e-07	3.2312e-05
Contig72516	ref|XP_012540789.1| PREDICTED: WASH complex subunit strumpellin [Monomorium pharaonis]	0.342084	-22.1194	4.19097	-5.27787	1.30694e-07	3.58575e-05
Contig56771	#N/A	0.464695	-22.0985	4.18327	-5.2826	1.27363e-07	3.52863e-05
Contig5965	ref|XP_011873944.1| PREDICTED: chymotrypsin-1-like [Vollenhovia emeryi]	65.0601	-22.0296	4.19301	-5.25388	1.48926e-07	4.00052e-05
Contig57902	ref|XP_011166588.1| PREDICTED: putative fatty acyl-CoA reductase CG5065 [Solenopsis invicta]	0.543515	-22.0216	4.19118	-5.25426	1.48622e-07	3.99998e-05
Contig103651	#N/A	0.283938	-21.9902	4.19645	-5.24019	1.60414e-07	4.22874e-05
Contig99707	#N/A	0.872589	-21.9855	4.1907	-5.24626	1.55216e-07	4.13024e-05
Contig131054	#N/A	0.342043	-21.9561	4.19242	-5.2371	1.63123e-07	4.2762e-05
Contig116306	ref|XP_011867770.1| PREDICTED: general transcription factor IIH subunit 2 [Vollenhovia emeryi]	3.69953	-21.9142	4.17474	-5.24922	1.52744e-07	4.07982e-05
Contig60597	#N/A	0.532713	-21.9075	4.1898	-5.22878	1.7063e-07	4.42375e-05
Contig46756	ref|XP_011883429.1| PREDICTED: ubiquitin carboxyl-terminal hydrolase 30 homolog [Vollenhovia emeryi]	4.03006	-21.8998	4.18243	-5.23615	1.64e-07	4.29015e-05
Contig82326	ref|XP_012349661.1| PREDICTED: carbamoyl-phosphate synthase small chain-like [Apis florea]	0.675122	-21.8636	4.18516	-5.22409	1.75e-07	4.49613e-05
Contig132469	#N/A	0.226778	-21.8287	4.18936	-5.2105	1.88337e-07	4.79485e-05
Contig30190	#N/A	3.41257	-21.8125	4.17297	-5.22711	1.72184e-07	4.44774e-05
Contig40282	#N/A	0.335207	-21.7314	4.18631	-5.19107	2.09086e-07	5.26617e-05
Contig117369	ref|XP_011876854.1| PREDICTED: meiosis-specific with OB domain-containing protein isoform X2 [Vollenhovia emeryi]	0.177529	-21.706	4.19005	-5.18038	2.2143e-07	5.5278e-05
Contig134139	ref|XP_011863531.1| PREDICTED: putative homeodomain transcription factor isoform X1 [Vollenhovia emeryi]	9.30241	-21.6943	4.16788	-5.20511	1.93882e-07	4.91831e-05
Contig123548	#N/A	0.859003	-21.6534	4.17719	-5.18373	2.17487e-07	5.46801e-05
Contig35001	ref|XP_012522537.1| PREDICTED: uncharacterized protein LOC105828627 [Monomorium pharaonis]	0.57211	-21.6436	4.19086	-5.16447	2.41127e-07	5.93564e-05
Contig57443	ref|XP_011566096.1| PREDICTED: glutamate-1-semialdehyde 2,1-aminomutase 2, chloroplastic-like [Plutella xylostella]	1.99379	-21.6412	3.96041	-5.46439	4.64508e-08	1.57395e-05
Contig97499	#N/A	0.916768	-21.615	4.17175	-5.18127	2.2038e-07	5.51134e-05
Contig73305	ref|XP_012249091.1| PREDICTED: probable proline--tRNA ligase, mitochondrial [Bombus impatiens]	0.536646	-21.6012	4.17776	-5.17052	2.33444e-07	5.75653e-05
Contig144689	#N/A	0.378672	-21.5845	4.18169	-5.16167	2.44758e-07	6.00604e-05
Contig83058	ref|XP_011692840.1| PREDICTED: dystrobrevin beta-like isoform X4 [Wasmannia auropunctata]	2.36868	-21.5752	3.87643	-5.56572	2.61069e-08	9.94294e-06
Contig129466	ref|XP_011697244.1| PREDICTED: cGMP-dependent protein kinase, isozyme 2 forms cD4/T1/T3A/T3B isoform X3 [Wasmannia auropunctata]	0.4254	-21.5275	4.19316	-5.13397	2.83695e-07	6.75975e-05
Contig80639	#N/A	0.428377	-21.4801	4.18528	-5.13229	2.86234e-07	6.7973e-05
Contig77041	#N/A	0.538233	-21.4699	4.19925	-5.11278	3.17448e-07	7.42624e-05
Contig23651	#N/A	0.678195	-21.4675	4.17825	-5.13793	2.77782e-07	6.64125e-05
Contig7287	ref|XP_011863932.1| PREDICTED: disintegrin and metalloproteinase domain-containing protein 10 isoform X1 [Vollenhovia emeryi]	2.15869	-21.4559	4.18171	-5.13089	2.88375e-07	6.83667e-05
Contig103244	ref|XP_012534025.1| PREDICTED: growth arrest-specific protein 8 [Monomorium pharaonis]	1.29433	-21.4392	4.1984	-5.10652	3.28153e-07	7.61364e-05
Contig86530	ref|XP_011050423.1| PREDICTED: uncharacterized protein LOC105143670 [Acromyrmex echinatior]	2.00011	-21.3801	4.18301	-5.11117	3.20171e-07	7.47236e-05
Contig116476	ref|XP_015586703.1| PREDICTED: PCTP-like protein [Cephus cinctus]	0.716888	-21.3173	4.1685	-5.1139	3.15574e-07	7.39463e-05
Contig59645	ref|XP_012530808.1| PREDICTED: zinc finger protein 431-like [Monomorium pharaonis]	17.204	-21.3119	4.17448	-5.10529	3.30296e-07	7.6508e-05
Contig4026	ref|XP_011880629.1| PREDICTED: endothelin-converting enzyme 1 [Vollenhovia emeryi]	4.87199	-21.2727	4.169	-5.10258	3.35e-07	7.73547e-05
Contig40462	ref|YP_009158746.1| NADH dehydrogenase subunit 4L (mitochondrion) [Petrosia ficiformis]	0.693429	-21.2557	4.19157	-5.07106	3.95597e-07	8.91494e-05
Contig15487	ref|XP_011700151.1| PREDICTED: V-type proton ATPase 116 kDa subunit a isoform 1 [Wasmannia auropunctata]	6.70112	-21.2339	4.16733	-5.09534	3.48116e-07	8.01103e-05
Contig85992	#N/A	0.778896	-21.2298	4.17742	-5.08203	3.73422e-07	8.52398e-05
Contig47969	#N/A	0.387664	-21.2225	4.17815	-5.0794	3.78632e-07	8.60123e-05
Contig14286	ref|XP_015785005.1| PREDICTED: elongation factor 1-alpha [Tetranychus urticae]	6.00625	-21.1878	4.18851	-5.05856	4.22435e-07	9.38502e-05
Contig137407	ref|XP_011858099.1| PREDICTED: uncharacterized protein LOC105555682 isoform X2 [Vollenhovia emeryi]	0.758757	-21.1404	4.17357	-5.06531	4.0774e-07	9.13034e-05
Contig2192	#N/A	19.3391	-21.14	4.17662	-5.06152	4.1592e-07	9.26944e-05
Contig118430	ref|XP_011173487.1| PREDICTED: vacuolar protein sorting-associated protein 16 homolog [Solenopsis invicta]	4.67365	-21.0923	4.1569	-5.07404	3.89448e-07	8.79039e-05
Contig22322	ref|XP_011631935.1| PREDICTED: DNA (cytosine-5)-methyltransferase PliMCI-like [Pogonomyrmex barbatus]	3.01582	-21.0504	4.17508	-5.04192	4.60896e-07	0.00010128
Contig46551	#N/A	0.360688	-21.025	4.18597	-5.02273	5.0941e-07	0.000110735
Contig72135	#N/A	0.338953	-21.0225	4.18714	-5.02074	5.14738e-07	0.000111592
Contig80953	ref|XP_011862229.1| PREDICTED: methyltransferase-like protein 16 homolog [Vollenhovia emeryi]	13.7085	-21.0209	4.16849	-5.0428	4.58769e-07	0.00010097
Contig136925	ref|XP_011860511.1| PREDICTED: activating transcription factor 7-interacting protein 1 isoform X2 [Vollenhovia emeryi]	5.23438	-21.0019	4.19094	-5.01126	5.40752e-07	0.000115943
Contig60492	#N/A	0.641233	-20.8799	4.18262	-4.99207	5.97342e-07	0.000126731
Contig31895	ref|XP_011867780.1| PREDICTED: cleft lip and palate transmembrane protein 1-like protein [Vollenhovia emeryi]	0.624253	-20.86	4.18027	-4.99012	6.0343e-07	0.00012783
Contig137006	#N/A	0.454556	-20.8432	4.18654	-4.97861	6.40438e-07	0.000134461
Contig7095	ref|XP_012249045.1| PREDICTED: 3,4-dihydroxy-2-butanone 4-phosphate synthase-like [Bombus impatiens]	0.957393	-20.8357	4.1716	-4.99465	5.89437e-07	0.00012543
Contig71830	#N/A	8.13778	-20.8293	4.17239	-4.99217	5.97e-07	0.000126731
Contig61947	ref|XP_011877725.1| PREDICTED: endothelin-converting enzyme 1-like [Vollenhovia emeryi]	1.60985	-20.8036	4.18365	-4.9726	6.60596e-07	0.000138282
Contig94777	ref|XP_011882029.1| PREDICTED: aminopeptidase N-like isoform X1 [Vollenhovia emeryi]	1.69693	-20.8009	4.17618	-4.98084	6.33076e-07	0.000133311
Contig126185	ref|XP_011172550.1| PREDICTED: uncharacterized protein LOC105204964 [Solenopsis invicta]	5.93594	-20.7525	2.71787	-7.63556	2.24835e-14	1.67203e-10
Contig69192	ref|XP_011155716.1| PREDICTED: proteasome-associated protein ECM29 homolog [Solenopsis invicta]	2.1886	-20.7496	4.19843	-4.94223	7.7233e-07	0.00015612
Contig33413	#N/A	0.634155	-20.7338	4.17821	-4.96236	6.96416e-07	0.000144284
Contig9427	#N/A	1.21481	-20.7241	4.17262	-4.96669	6.81e-07	0.000141721
Contig121206	ref|XP_012527420.1| PREDICTED: uncharacterized protein LOC105831671 [Monomorium pharaonis]	2.40264	-20.7048	4.17572	-4.95838	7.10842e-07	0.000146627
Contig104199	#N/A	15.1225	-20.6952	4.1788	-4.95244	7.32899e-07	0.000150025
Contig91081	ref|XP_013078548.1| PREDICTED: phoH-like protein [Biomphalaria glabrata]	0.953403	-20.693	4.17139	-4.9607	7.02398e-07	0.00014531
Contig55087	ref|XP_011566844.1| PREDICTED: ATP-dependent DNA helicase srs2-like [Plutella xylostella]	0.713726	-20.6899	4.1784	-4.95163	7.35933e-07	0.000150268
Contig86452	ref|XP_012539260.1| PREDICTED: uncharacterized protein LOC105838320 [Monomorium pharaonis]	1.944	-20.6792	4.17507	-4.95303	7.30662e-07	0.000149841
Contig137723	ref|XP_011067182.1| PREDICTED: mitochondrial import receptor subunit TOM40 homolog 1 [Acromyrmex echinatior]	0.433273	-20.6605	4.19149	-4.92914	8.25905e-07	0.000165294
Contig123416	ref|XP_011172203.1| PREDICTED: adenosine 3'-phospho 5'-phosphosulfate transporter 1-like [Solenopsis invicta]	0.629883	-20.655	4.17801	-4.94375	7.66348e-07	0.000155133
Contig76221	ref|XP_012523460.1| PREDICTED: pyridoxal kinase [Monomorium pharaonis]	3.25455	-20.6508	4.16748	-4.95523	7.22432e-07	0.000148584
Contig121174	ref|XP_011687748.1| PREDICTED: O-glucosyltransferase rumi homolog isoform X1 [Wasmannia auropunctata]	1.13894	-20.6447	4.18354	-4.93475	8.02552e-07	0.000161077
Contig127047	ref|XP_011057796.1| PREDICTED: LOW QUALITY PROTEIN: S phase cyclin A-associated protein in the endoplasmic reticulum [Acromyrmex echinatior]	0.506377	-20.5971	4.18442	-4.92233	8.55212e-07	0.000170436
Contig67094	ref|XP_011859285.1| PREDICTED: uncharacterized protein LOC105556783 [Vollenhovia emeryi]	5.08852	-20.5754	4.19144	-4.9089	9.15906e-07	0.000179993
Contig45040	ref|XP_009016465.1| hypothetical protein HELRODRAFT_105094 [Helobdella robusta]	16.7483	-20.5753	4.17532	-4.92784	8.31433e-07	0.000166166
Contig80584	ref|XP_011172617.1| PREDICTED: nuclear pore complex protein Nup205 [Solenopsis invicta]	0.672449	-20.5667	4.17775	-4.92292	8.52615e-07	0.000170158
Contig139365	ref|XP_012223069.1| PREDICTED: mitogen-activated protein kinase 14A-like isoform X3 [Linepithema humile]	0.560112	-20.5549	4.19166	-4.90376	9.40172e-07	0.000183994
Contig131221	ref|XP_005112930.1| PREDICTED: 60S ribosomal protein L7a [Aplysia californica]	1.45015	-20.5001	4.18507	-4.89839	9.66261e-07	0.000188577
Contig85197	#N/A	0.466494	-20.4178	4.17869	-4.88618	1.02812e-06	0.000200098
Contig122083	#N/A	0.217406	-20.4148	4.19304	-4.86874	1.12314e-06	0.000216307
Contig133269	#N/A	0.256172	-20.3907	4.1896	-4.86697	1.13322e-06	0.000217852
Contig46744	ref|XP_011866107.1| PREDICTED: succinyl-CoA ligase [ADP/GDP-forming] subunit alpha, mitochondrial isoform X3 [Vollenhovia emeryi]	0.715038	-20.3663	4.17102	-4.8828	1.0459e-06	0.000203277
Contig79229	#N/A	0.388998	-20.3576	4.19451	-4.8534	1.21361e-06	0.000232042
Contig49220	ref|XP_015608840.1| PREDICTED: phosphate import ATP-binding protein PstB-like [Cephus cinctus]	0.963307	-20.3085	4.19442	-4.84179	1.28673e-06	0.000244042
Contig38619	ref|XP_011169209.1| PREDICTED: kinesin-like protein Klp10A isoform X3 [Solenopsis invicta]	0.767496	-20.3036	4.19895	-4.8354	1.32881e-06	0.000250343
Contig97670	#N/A	0.409224	-20.298	4.18479	-4.85043	1.232e-06	0.000235232
Contig134818	ref|XP_011866885.1| PREDICTED: sodium-independent sulfate anion transporter [Vollenhovia emeryi]	3.51684	-20.2805	4.17574	-4.85675	1.19328e-06	0.000228775
Contig63451	#N/A	0.617499	-20.2795	4.1771	-4.85492	1.20435e-06	0.000230584
Contig34002	ref|XP_013783884.1| PREDICTED: superoxide dismutase [Cu-Zn] 2-like [Limulus polyphemus]	1.04961	-20.2662	3.68221	-5.5038	3.7169e-08	1.32012e-05
Contig107569	ref|XP_013772296.1| PREDICTED: 60S ribosomal protein L15-like [Limulus polyphemus]	1.23456	-20.2618	4.18567	-4.84075	1.29349e-06	0.000244995
Contig54232	ref|XP_011865391.1| PREDICTED: uncharacterized protein KIAA0556-like isoform X1 [Vollenhovia emeryi]	2.16974	-20.2537	3.83835	-5.27665	1.31565e-07	3.60266e-05
Contig60688	#N/A	0.288634	-20.2053	4.20039	-4.81035	1.50664e-06	0.000277554
Contig121189	ref|XP_012056871.1| PREDICTED: F-box/LRR-repeat protein 4-like [Atta cephalotes]	1.20704	-20.1753	4.1831	-4.82304	1.41384e-06	0.000263203
Contig34886	ref|XP_011050843.1| PREDICTED: uncharacterized protein LOC105143938 [Acromyrmex echinatior]	0.885746	-20.1705	4.17209	-4.83462	1.334e-06	0.000250981
Contig112255	ref|XP_011176144.1| PREDICTED: lys-63-specific deubiquitinase BRCC36-like [Solenopsis invicta]	0.537832	-20.0629	4.19895	-4.77807	1.76984e-06	0.000318159
Contig56366	#N/A	1.16713	-20.0413	4.171	-4.80491	1.54819e-06	0.000284466
Contig128609	#N/A	0.28714	-20.0185	4.19214	-4.77525	1.79485e-06	0.000321836
Contig105833	ref|XP_012542391.1| PREDICTED: DDB1- and CUL4-associated factor 11 [Monomorium pharaonis]	3.26976	-19.9938	4.1695	-4.79525	1.62473e-06	0.000296218
Contig27149	ref|XP_011165630.1| PREDICTED: transient receptor potential cation channel subfamily V member 5 isoform X1 [Solenopsis invicta]	1.0417	-19.9861	4.1715	-4.7911	1.65866e-06	0.000301213
Contig84530	#N/A	0.843851	-19.9157	4.18523	-4.75856	1.94975e-06	0.000343509
Contig64504	ref|XP_011869290.1| PREDICTED: tyrosine-protein phosphatase 10D isoform X1 [Vollenhovia emeryi]	1.19219	-19.9088	4.17746	-4.76577	1.8813e-06	0.000334732
Contig31814	#N/A	0.609178	-19.9037	4.17982	-4.76186	1.91816e-06	0.000339638
Contig148964	ref|XP_011868733.1| PREDICTED: gamma-aminobutyric acid type B receptor subunit 1 isoform X2 [Vollenhovia emeryi]	1.03433	-19.8778	4.17684	-4.75906	1.945e-06	0.000343509
Contig145568	ref|XP_011879409.1| PREDICTED: thyroid adenoma-associated protein homolog isoform X1 [Vollenhovia emeryi]	0.989772	-19.8646	4.19161	-4.73913	2.14635e-06	0.000371658
Contig68437	#N/A	8.28826	-19.8644	4.19806	-4.73181	2.22527e-06	0.000382977
Contig87259	ref|XP_003484469.1| PREDICTED: translationally-controlled tumor protein homolog [Bombus impatiens]	1.45121	-19.8241	4.17958	-4.74307	2.105e-06	0.0003654
Contig23677	ref|YP_008999618.1| cytochrome c oxidase subunit II (mitochondrion) [Antricola mexicanus]	0.800033	-19.8064	4.18369	-4.73419	2.19933e-06	0.000378974
Contig82781	ref|XP_011050396.1| PREDICTED: zinc finger protein 346-like [Acromyrmex echinatior]	0.60266	-19.7934	4.18516	-4.72941	2.25173e-06	0.00038706
Contig48098	#N/A	9.27965	-19.7546	4.18633	-4.71882	2.37212e-06	0.000402853
Contig97239	ref|XP_011860781.1| PREDICTED: rho guanine nucleotide exchange factor 18-like isoform X9 [Vollenhovia emeryi]	3.63401	-19.7539	4.18263	-4.72285	2.32561e-06	0.000397067
Contig81745	ref|XP_011644962.1| PREDICTED: UPF0668 protein C10orf76 homolog [Pogonomyrmex barbatus]	2.97809	-19.7493	3.70248	-5.33406	9.6e-08	2.80956e-05
Contig29771	#N/A	0.362395	-19.7382	4.18617	-4.7151	2.41589e-06	0.000405895
Contig32216	#N/A	0.447033	-19.72	4.17982	-4.7179	2.38288e-06	0.000403227
Contig37753	ref|XP_011688540.1| PREDICTED: maternal protein pumilio-like [Wasmannia auropunctata]	1.42192	-19.7138	4.17585	-4.7209	2.348e-06	0.000399723
Contig53290	#N/A	0.686364	-19.7063	4.18536	-4.70838	2.497e-06	0.000417036
Contig17195	ref|XP_009055569.1| hypothetical protein LOTGIDRAFT_209470, partial [Lottia gigantea]	2.25858	-19.6854	4.1822	-4.70695	2.51453e-06	0.000418487
Contig145409	ref|XP_014787008.1| PREDICTED: ubiquitin-40S ribosomal protein S27a [Octopus bimaculoides]	0.685	-19.6832	4.18631	-4.7018	2.57878e-06	0.000428171
Contig33503	ref|XP_011876720.1| PREDICTED: cytoplasmic dynein 2 heavy chain 1 [Vollenhovia emeryi]	1.00227	-19.6787	4.17973	-4.70813	2.5e-06	0.000417042
Contig81440	#N/A	1.04252	-19.6701	4.1707	-4.71626	2.40215e-06	0.000404548
Contig24430	ref|XP_011858347.1| PREDICTED: putative nuclease HARBI1 [Vollenhovia emeryi]	1.17807	-19.6526	3.57728	-5.49371	3.93566e-08	1.37989e-05
Contig63917	#N/A	0.593462	-19.6503	4.18052	-4.70043	2.59613e-06	0.000429538
Contig69554	ref|XP_012531093.1| PREDICTED: eukaryotic peptide chain release factor subunit 1 isoform X1 [Monomorium pharaonis]	0.611648	-19.6326	4.18587	-4.6902	2.72934e-06	0.000446045
Contig74338	ref|XP_011051107.1| PREDICTED: uncharacterized protein LOC105144108 [Acromyrmex echinatior]	5.40754	-19.6269	4.18256	-4.69255	2.69816e-06	0.000442276
Contig45821	#N/A	0.368856	-19.6006	4.18617	-4.68222	2.83787e-06	0.000460314
Contig62265	#N/A	0.69637	-19.599	4.17879	-4.69011	2.73062e-06	0.000446045
Contig44241	#N/A	0.373298	-19.5897	4.19365	-4.67128	2.99322e-06	0.00048225
Contig69046	ref|XP_012059366.1| PREDICTED: solute carrier family 17 member 9 [Atta cephalotes]	1.14477	-19.5817	4.17607	-4.68903	2.745e-06	0.000447363
Contig44043	ref|XP_011879917.1| PREDICTED: autophagy protein 5 [Vollenhovia emeryi]	1.19311	-19.5458	4.17769	-4.67861	2.88819e-06	0.000466404
Contig87661	#N/A	0.557317	-19.5064	4.18444	-4.66164	3.137e-06	0.000500273
Contig127543	ref|XP_011866150.1| PREDICTED: putative serine protease K12H4.7 [Vollenhovia emeryi]	20.4085	-19.5009	4.19411	-4.64958	3.3261e-06	0.00052335
Contig71908	ref|XP_011054675.1| PREDICTED: inositol-phosphate phosphatase-like [Acromyrmex echinatior]	1.03983	-19.4903	4.18029	-4.66243	3.125e-06	0.000499501
Contig104450	#N/A	0.525432	-19.48	4.17264	-4.6685	3.03406e-06	0.000487717
Contig29594	#N/A	0.459163	-19.4738	4.1708	-4.66906	3.02575e-06	0.000486935
Contig128917	ref|XP_011172985.1| PREDICTED: insulin-degrading enzyme-like [Solenopsis invicta]	0.332341	-19.4709	4.17881	-4.65945	3.17061e-06	0.000503368
Contig10840	ref|XP_005094961.1| PREDICTED: probable imidazolonepropionase [Aplysia californica]	1.05696	-19.4516	4.17967	-4.65386	3.25777e-06	0.000514316
Contig79456	ref|XP_011066550.1| PREDICTED: uncharacterized protein PFB0765w-like [Acromyrmex echinatior]	0.690054	-19.3812	4.1843	-4.63188	3.62354e-06	0.000562014
Contig53289	ref|XP_012525293.1| PREDICTED: coiled-coil domain-containing protein 8 homolog [Monomorium pharaonis]	1.35783	-19.3775	4.1993	-4.61446	3.94116e-06	0.000598804
Contig105550	#N/A	0.206383	-19.3747	4.19303	-4.62068	3.8248e-06	0.000584884
Contig91781	#N/A	1.62149	-19.3738	4.15783	-4.65958	3.16853e-06	0.000503368
Contig86824	#N/A	0.701452	-19.3701	4.1786	-4.63554	3.56014e-06	0.000552788
Contig88274	ref|XP_009064700.1| hypothetical protein LOTGIDRAFT_148309 [Lottia gigantea]	26.5419	-19.3524	4.18317	-4.62627	3.72318e-06	0.00057369
Contig147826	ref|XP_011066133.1| PREDICTED: probable elongator complex protein 3 [Acromyrmex echinatior]	0.518841	-19.3485	4.18557	-4.62267	3.78839e-06	0.000581834
Contig64852	ref|XP_011876417.1| PREDICTED: protein trachealess isoform X8 [Vollenhovia emeryi]	0.789607	-19.3415	4.18706	-4.61934	3.84955e-06	0.000587397
Contig69976	ref|XP_011696169.1| PREDICTED: leukotriene A-4 hydrolase [Wasmannia auropunctata]	3.05419	-19.3404	4.16935	-4.63871	3.50594e-06	0.000545572
Contig98496	#N/A	0.901736	-19.338	4.17988	-4.62644	3.72012e-06	0.00057369
Contig68489	ref|XP_017063244.1| PREDICTED: LOW QUALITY PROTEIN: bifunctional purine biosynthesis protein PurH-like [Drosophila eugracilis]	1.28629	-19.3328	4.05101	-4.77234	1.821e-06	0.000325702
Contig77059	#N/A	0.931454	-19.3051	4.17769	-4.621	3.81886e-06	0.000584884
Contig66462	ref|XP_011879931.1| PREDICTED: glutamate receptor ionotropic, kainate 2-like [Vollenhovia emeryi]	4.12364	-19.3005	3.67079	-5.25786	1.45739e-07	3.92987e-05
Contig55780	ref|XP_012542484.1| PREDICTED: U1 small nuclear ribonucleoprotein A [Monomorium pharaonis]	1.52101	-19.2916	4.18292	-4.612	3.98819e-06	0.000603339
Contig33449	ref|XP_001605621.1| PREDICTED: ATP-binding cassette sub-family F member 3 [Nasonia vitripennis]	0.397054	-19.2887	4.18185	-4.61249	3.97881e-06	0.000603145
Contig104237	#N/A	0.267041	-19.2754	4.18545	-4.60533	4.11808e-06	0.000618355
Contig93125	ref|XP_017032415.1| PREDICTED: protein jag-like [Drosophila kikkawai]	0.701877	-19.2719	4.17682	-4.61401	3.94975e-06	0.000599451
Contig53701	#N/A	0.71562	-19.2493	4.18522	-4.59936	4.23792e-06	0.000632987
Contig27940	ref|XP_011687654.1| PREDICTED: high affinity copper uptake protein 1 [Wasmannia auropunctata]	2.62986	-19.2463	4.20164	-4.58066	4.63508e-06	0.000681117
Contig49562	#N/A	0.444028	-19.2396	4.17672	-4.60638	4.09738e-06	0.000616558
Contig137927	#N/A	0.195336	-19.2196	4.1955	-4.581	4.62756e-06	0.000681105
Contig138794	#N/A	0.195336	-19.2196	4.1955	-4.581	4.62756e-06	0.000681105
Contig128500	#N/A	0.562684	-19.2095	4.1834	-4.59184	4.39356e-06	0.000652097
Contig38861	#N/A	0.741334	-19.202	4.17673	-4.59737	4.27853e-06	0.000637033
Contig37548	#N/A	0.37199	-19.1922	4.18115	-4.59018	4.42861e-06	0.00065661
Contig43090	#N/A	0.419108	-19.1818	4.19958	-4.56756	4.93438e-06	0.00071656
Contig99131	ref|XP_006814771.1| PREDICTED: DNA polymerase subunit gamma-2, mitochondrial-like [Saccoglossus kowalevskii]	0.559979	-19.1784	4.18415	-4.58359	4.57069e-06	0.000674138
Contig33784	#N/A	0.520014	-19.1763	4.17964	-4.58803	4.47454e-06	0.00066203
Contig84408	#N/A	0.217768	-19.1484	4.18725	-4.57302	4.8075e-06	0.000702466
Contig109370	#N/A	6.69703	-19.1483	4.18434	-4.57617	4.73565e-06	0.000693403
Contig59012	ref|XP_011647720.1| PREDICTED: uridine-cytidine kinase-like 1 isoform X2 [Pogonomyrmex barbatus]	0.410933	-19.1478	4.18382	-4.57664	4.725e-06	0.000692559
Contig60809	ref|XP_012794736.1| ADP,ATP carrier protein [Schistosoma haematobium]	0.411601	-19.1364	4.18625	-4.57126	4.848e-06	0.000707647
Contig126434	#N/A	0.472702	-19.1217	4.18433	-4.56985	4.88074e-06	0.00071023
Contig75571	#N/A	0.692997	-19.0932	4.18367	-4.56375	5.02477e-06	0.000726698
Contig49256	#N/A	1.55358	-19.0872	3.46021	-5.51619	3.46421e-08	1.24684e-05
Contig93736	#N/A	0.400714	-19.0865	4.18657	-4.55897	5.1405e-06	0.000740405
Contig140654	ref|XP_011860074.1| PREDICTED: aminopeptidase N-like isoform X1 [Vollenhovia emeryi]	0.350673	-19.0822	4.18652	-4.55802	5.16374e-06	0.000741247
Contig72020	ref|XP_011864070.1| PREDICTED: innexin inx7 isoform X2 [Vollenhovia emeryi]	1.76468	-19.0719	4.18451	-4.55774	5.1708e-06	0.000741247
Contig54362	#N/A	0.891694	-19.0654	4.17795	-4.56333	5.03476e-06	0.0007274
Contig75928	ref|XP_014085430.1| PREDICTED: probable 60S ribosomal protein L37-A [Bactrocera oleae]	0.677212	-19.0589	4.19729	-4.54077	5.605e-06	0.000781808
Contig49419	#N/A	13.0225	-19.0574	4.19019	-4.54809	5.41353e-06	0.000761868
Contig102553	#N/A	0.567167	-19.0491	4.18	-4.55721	5.18371e-06	0.000741247
Contig75115	ref|XP_011877267.1| PREDICTED: inositol polyphosphate 5-phosphatase OCRL-1 [Vollenhovia emeryi]	1.85231	-19.0199	4.18932	-4.5401	5.62277e-06	0.000782662
Contig75480	#N/A	0.694441	-19.0123	4.17737	-4.55126	5.33245e-06	0.00075346
Contig85361	ref|XP_012219927.1| PREDICTED: probable ATP-dependent RNA helicase DHX35 [Linepithema humile]	0.310901	-18.9962	4.18121	-4.54323	5.54e-06	0.000775798
Contig67821	ref|XP_012340548.1| PREDICTED: uncharacterized protein LOC105735132, partial [Apis florea]	0.67774	-18.9926	4.17768	-4.54622	5.46184e-06	0.000766377
Contig115259	#N/A	0.288888	-18.9844	4.18	-4.54173	5.57956e-06	0.000779027
Contig64043	ref|XP_003695175.1| PREDICTED: formin-like protein CG32138, partial [Apis florea]	1.20615	-18.9805	4.19029	-4.52963	5.90868e-06	0.000811124
Contig100740	#N/A	0.448682	-18.9745	4.18534	-4.53357	5.79954e-06	0.000799883
Contig54785	#N/A	0.339527	-18.9666	4.18171	-4.5356	5.744e-06	0.000794139
Contig83978	#N/A	0.316181	-18.9659	4.18618	-4.53059	5.8819e-06	0.000809245
Contig72594	#N/A	0.43412	-18.961	4.18664	-4.52893	5.92844e-06	0.000812483
Contig45765	#N/A	0.338498	-18.9582	4.18822	-4.52656	5.99528e-06	0.000820054
Contig87620	ref|XP_011052512.1| PREDICTED: uncharacterized protein LOC105144948 [Acromyrmex echinatior]	0.666686	-18.9447	4.17541	-4.5372	5.70067e-06	0.00078892
Contig88219	#N/A	6.90914	-18.9421	4.19793	-4.51226	6.41418e-06	0.000869774
Contig135266	#N/A	0.5851	-18.9367	4.18219	-4.52795	5.95588e-06	0.000815454
Contig82044	ref|XP_015918911.1| PREDICTED: uncharacterized protein LOC107448283 [Parasteatoda tepidariorum]	0.556583	-18.9294	4.16679	-4.54292	5.548e-06	0.000776044
Contig62593	#N/A	0.366152	-18.9116	4.20069	-4.50201	6.73138e-06	0.000898983
Contig149757	ref|XP_011866219.1| PREDICTED: folliculin-interacting protein 2 isoform X7 [Vollenhovia emeryi]	0.950135	-18.9023	4.17316	-4.52948	5.91278e-06	0.000811124
Contig61260	ref|XP_015436739.1| PREDICTED: cystathionine beta-synthase [Dufourea novaeangliae]	0.625426	-18.8924	4.18771	-4.5114	6.44022e-06	0.000871632
Contig51787	#N/A	0.480933	-18.8915	4.18033	-4.51914	6.20909e-06	0.000847658
Contig82299	#N/A	0.760839	-18.8733	4.17782	-4.51749	6.25784e-06	0.000853488
Contig62462	#N/A	0.275425	-18.8692	4.18065	-4.51347	6.37759e-06	0.000865643
Contig136771	ref|XP_011157186.1| PREDICTED: restin homolog [Solenopsis invicta]	0.402087	-18.8649	4.18453	-4.50825	6.53656e-06	0.000878575
Contig52048	ref|XP_011880629.1| PREDICTED: endothelin-converting enzyme 1 [Vollenhovia emeryi]	0.418842	-18.8647	4.18462	-4.50809	6.54126e-06	0.000878575
Contig149567	ref|XP_011685987.1| PREDICTED: conserved oligomeric Golgi complex subunit 5-like [Wasmannia auropunctata]	3.87773	-18.8559	3.4566	-5.45504	4.9e-08	1.65111e-05
Contig126209	#N/A	0.291506	-18.8485	4.18314	-4.50582	6.61158e-06	0.000885885
Contig61599	#N/A	0.463395	-18.8336	4.18447	-4.50083	6.76875e-06	0.000901418
Contig75590	ref|XP_016664628.1| PREDICTED: ferric enterobactin transport ATP-binding protein FepC-like, partial [Acyrthosiphon pisum]	0.896407	-18.8318	4.18333	-4.50162	6.74368e-06	0.000899412
Contig17442	ref|XP_011049164.1| PREDICTED: zinc finger protein 330 homolog [Acromyrmex echinatior]	0.553877	-18.8283	4.18366	-4.50044	6.7814e-06	0.000902252
Contig107912	#N/A	0.405383	-18.825	4.1739	-4.51017	6.47769e-06	0.000873357
Contig18100	ref|XP_011057028.1| PREDICTED: hormone receptor 4 isoform X1 [Acromyrmex echinatior]	0.389654	-18.8217	4.17907	-4.50381	6.67454e-06	0.000892235
Contig57598	#N/A	0.333463	-18.8208	4.18516	-4.49704	6.89055e-06	0.000915912
Contig65368	#N/A	0.307483	-18.8088	4.18718	-4.492	7.05565e-06	0.000933467
Contig136681	#N/A	0.774313	-18.807	4.17794	-4.50151	6.74733e-06	0.000899412
Contig6658	#N/A	0.644968	-18.8066	4.17006	-4.50992	6.48525e-06	0.000873542
Contig89878	ref|XP_011565865.1| PREDICTED: uncharacterized hydrolase C215.10-like [Plutella xylostella]	0.355052	-18.7887	4.18512	-4.48942	7.14189e-06	0.00094223
Contig139627	ref|XP_012521562.1| PREDICTED: peroxiredoxin-2B-like [Monomorium pharaonis]	0.862015	-18.7814	4.18411	-4.48875	7.16408e-06	0.000944275
Contig66713	ref|XP_017091282.1| PREDICTED: C-1-tetrahydrofolate synthase, cytoplasmic isoform X2 [Drosophila bipectinata]	0.509699	-18.7658	4.18549	-4.48353	7.34192e-06	0.000960917
Contig121945	#N/A	0.373447	-18.7623	4.18139	-4.48709	7.22025e-06	0.000949907
Contig34526	#N/A	0.679238	-18.7538	4.18519	-4.48098	7.43009e-06	0.000967604
Contig28722	ref|XP_013295799.1| translation elongation factor EF-1, subunit alpha [Necator americanus]	0.544922	-18.75	4.19958	-4.46474	8.01676e-06	0.00102604
Contig60033	#N/A	0.34889	-18.7483	4.20069	-4.46315	8.07629e-06	0.00103179
Contig62543	#N/A	0.312121	-18.7447	4.18225	-4.48196	7.3961e-06	0.000966409
Contig109971	#N/A	1.0454	-18.743	4.18512	-4.47849	7.5173e-06	0.000975365
Contig91645	ref|XP_011874188.1| PREDICTED: uncharacterized protein LOC105565527 [Vollenhovia emeryi]	4.77411	-18.7279	2.49859	-7.49539	6.61038e-14	4.67014e-10
Contig127673	ref|XP_011859007.1| PREDICTED: uncharacterized protein LOC105556520 [Vollenhovia emeryi]	2.37456	-18.7266	4.16772	-4.49325	7.01447e-06	0.00092976
Contig9816	#N/A	0.420509	-18.725	4.1802	-4.47945	7.48363e-06	0.000972783
Contig82023	#N/A	0.468962	-18.7238	4.17387	-4.48597	7.25844e-06	0.000953156
Contig69283	#N/A	0.721784	-18.7012	4.1839	-4.4698	7.82923e-06	0.00100659
Contig55966	ref|XP_015751239.1| PREDICTED: delta(8)-fatty-acid desaturase 2-like [Acropora digitifera]	4.4969	-18.6991	4.19794	-4.45435	8.41487e-06	0.00106541
Contig47532	#N/A	1.18227	-18.6907	4.1718	-4.48023	7.45614e-06	0.000970102
Contig71469	#N/A	0.434858	-18.6888	4.18108	-4.46985	7.82745e-06	0.00100659
Contig39582	#N/A	0.33322	-18.6878	4.18378	-4.46672	7.94272e-06	0.00102026
Contig5232	ref|XP_011705446.1| PREDICTED: protein spire homolog 1-like isoform X1 [Wasmannia auropunctata]	2.92431	-18.684	4.184	-4.46558	7.98529e-06	0.00102318
Contig108127	#N/A	0.493295	-18.6808	4.17862	-4.47056	7.80149e-06	0.00100659
Contig47235	#N/A	0.313142	-18.679	4.18539	-4.46291	8.08556e-06	0.00103204
Contig5085	#N/A	1.15559	-18.6723	3.44781	-5.41571	6.1e-08	1.98884e-05
Contig77448	ref|XP_011638288.1| PREDICTED: chondroitin sulfate synthase 1-like [Pogonomyrmex barbatus]	0.30451	-18.6679	4.2	-4.44473	8.80018e-06	0.00108883
Contig91401	ref|XP_011705119.1| PREDICTED: cytochrome P450 6g1-like, partial [Wasmannia auropunctata]	0.35808	-18.664	4.18606	-4.45862	8.249e-06	0.00105006
Contig94157	#N/A	0.358807	-18.662	4.18534	-4.4589	8.238e-06	0.00104959
Contig104546	#N/A	4.12444	-18.6585	4.191	-4.45204	8.50587e-06	0.00107022
Contig110230	ref|XP_012539052.1| PREDICTED: glutamate receptor ionotropic, kainate 2 isoform X3 [Monomorium pharaonis]	0.638578	-18.6534	4.18433	-4.45793	8.27539e-06	0.00105246
Contig94123	ref|XP_011881004.1| PREDICTED: pyridoxal-dependent decarboxylase domain-containing protein 1 [Vollenhovia emeryi]	0.603265	-18.6511	4.18435	-4.45735	8.29806e-06	0.0010544
Contig53394	ref|XP_011878775.1| PREDICTED: trace amine-associated receptor 9 [Vollenhovia emeryi]	0.599935	-18.6476	4.18485	-4.45598	8.351e-06	0.00105826
Contig143964	ref|XP_014208752.1| PREDICTED: ubiquitin-conjugating enzyme E2 J1-like isoform X2 [Copidosoma floridanum]	0.507782	-18.6463	4.18432	-4.45623	8.3414e-06	0.001058
Contig140383	#N/A	0.304996	-18.6441	4.18718	-4.45267	8.48092e-06	0.00106994
Contig33890	#N/A	0.436929	-18.6353	4.18557	-4.45228	8.49639e-06	0.00106998
Contig74783	ref|XP_011694699.1| PREDICTED: post-GPI attachment to proteins factor 3 isoform X2 [Wasmannia auropunctata]	0.941448	-18.6279	4.18673	-4.44927	8.61608e-06	0.00107648
Contig33936	ref|XP_011872302.1| PREDICTED: EH domain-containing protein 3 isoform X1 [Vollenhovia emeryi]	0.344236	-18.6267	4.18267	-4.45331	8.45558e-06	0.00106769
Contig88849	#N/A	0.317896	-18.61	4.18607	-4.4457	8.76065e-06	0.0010887
Contig79901	ref|XP_011164672.1| PREDICTED: alpha-tocopherol transfer protein-like isoform X2 [Solenopsis invicta]	0.35816	-18.6034	4.18496	-4.4453	8.777e-06	0.00108883
Contig45933	#N/A	0.407305	-18.6027	4.18131	-4.44903	8.6261e-06	0.00107672
Contig83020	ref|XP_015921374.1| PREDICTED: uncharacterized protein LOC107450151 [Parasteatoda tepidariorum]	0.594715	-18.5982	4.18418	-4.44488	8.79407e-06	0.00108883
Contig1141	ref|XP_012540397.1| PREDICTED: uncharacterized protein LOC105838973 [Monomorium pharaonis]	9.14543	-18.5943	4.03273	-4.61084	4.01036e-06	0.000604751
Contig51242	#N/A	0.311506	-18.5903	4.18634	-4.4407	8.9666e-06	0.00110458
Contig103822	ref|XP_011645733.1| PREDICTED: uncharacterized protein LOC105432571 [Pogonomyrmex barbatus]	0.478808	-18.5851	4.17855	-4.44774	8.67783e-06	0.00108031
Contig21614	ref|XP_011864718.1| PREDICTED: general odorant-binding protein 69a-like [Vollenhovia emeryi]	0.330206	-18.5697	4.18595	-4.43621	9.15568e-06	0.00112395
Contig44260	#N/A	0.184466	-18.5655	4.18743	-4.43362	9.26647e-06	0.00113361
Contig44737	ref|XP_011880619.1| PREDICTED: uncharacterized protein LOC105569073 isoform X2 [Vollenhovia emeryi]	1.50687	-18.5644	4.16951	-4.45241	8.49115e-06	0.00106998
Contig39382	#N/A	0.335177	-18.5615	4.18487	-4.43538	9.19084e-06	0.00112534
Contig65127	ref|XP_011160390.1| PREDICTED: ATP-dependent Clp protease proteolytic subunit, mitochondrial [Solenopsis invicta]	3.05377	-18.5584	4.1759	-4.44418	8.82278e-06	0.00108971
Contig78720	ref|XP_014237487.1| PREDICTED: aspartate--tRNA ligase, mitochondrial [Trichogramma pretiosum]	0.996742	-18.5467	4.18001	-4.437	9.12233e-06	0.00112249
Contig33206	#N/A	0.426529	-18.5452	4.18916	-4.42694	9.55791e-06	0.00116023
Contig134009	ref|XP_011163252.1| PREDICTED: ribosomal protein S6 kinase 2 beta-like, partial [Solenopsis invicta]	0.339776	-18.5432	4.18978	-4.42582	9.6076e-06	0.00116526
Contig5234	ref|XP_011705448.1| PREDICTED: protein spire homolog 1-like isoform X3 [Wasmannia auropunctata]	0.768192	-18.5357	4.19067	-4.4231	9.72957e-06	0.00117484
Contig129404	#N/A	0.360384	-18.5356	4.17851	-4.43594	9.16723e-06	0.00112439
Contig117672	ref|XP_012222572.1| PREDICTED: lysosomal alpha-mannosidase isoform X1 [Linepithema humile]	0.26168	-18.534	4.18264	-4.43116	9.37253e-06	0.00114461
Contig97286	ref|XP_011870210.1| PREDICTED: C2 domain-containing protein 3 isoform X1 [Vollenhovia emeryi]	6.97909	-18.5334	4.19083	-4.42237	9.76244e-06	0.00117496
Contig81038	#N/A	2.94829	-18.532	4.19178	-4.42103	9.823e-06	0.00118124
Contig58771	#N/A	2.04366	-18.5113	4.1919	-4.41597	1.0056e-05	0.00120007
Contig37641	ref|XP_011639327.1| PREDICTED: LOW QUALITY PROTEIN: zinc finger protein on ecdysone puffs [Pogonomyrmex barbatus]	5.01289	-18.494	4.17671	-4.4279	9.5155e-06	0.00115607
Contig145333	ref|XP_013067388.1| PREDICTED: laccase-4-like [Biomphalaria glabrata]	0.641667	-18.493	4.18441	-4.4195	9.893e-06	0.00118764
Contig40883	ref|XP_011704989.1| PREDICTED: uncharacterized protein LOC105460252 isoform X2 [Wasmannia auropunctata]	0.468258	-18.4887	4.18451	-4.41837	9.94492e-06	0.00119286
Contig90286	ref|XP_013411172.1| PREDICTED: ATP-binding cassette sub-family A member 3-like isoform X2 [Lingula anatina]	0.528583	-18.4791	4.18445	-4.41614	1.00481e-05	0.00120007
Contig32959	#N/A	0.313377	-18.4753	4.18607	-4.41352	1.01702e-05	0.00120656
Contig93558	#N/A	0.346461	-18.4725	4.18516	-4.41382	1.01565e-05	0.00120595
Contig75804	ref|XP_011880563.1| PREDICTED: 3-hydroxyisobutyryl-CoA hydrolase, mitochondrial isoform X2 [Vollenhovia emeryi]	0.856946	-18.4652	4.18336	-4.41396	1.01496e-05	0.00120595
Contig129353	ref|XP_011858818.1| PREDICTED: uncharacterized protein LOC105556344 [Vollenhovia emeryi]	0.275662	-18.4618	4.18669	-4.40964	1.03543e-05	0.00122429
Contig142186	ref|XP_011169215.1| PREDICTED: uncharacterized protein LOC105202410 [Solenopsis invicta]	0.378625	-18.4505	4.18534	-4.40835	1.0416e-05	0.00122953
Contig129472	ref|XP_011164368.1| PREDICTED: synembryn [Solenopsis invicta]	1.04624	-18.4407	4.1791	-4.41261	1.02133e-05	0.00120863
Contig71227	#N/A	0.425925	-18.4404	4.17776	-4.41393	1.01509e-05	0.00120595
Contig64265	#N/A	0.322556	-18.4238	4.18568	-4.40163	1.07442e-05	0.0012609
Contig62859	#N/A	0.433164	-18.422	4.18484	-4.40208	1.07216e-05	0.00125929
Contig128112	ref|XP_011860409.1| PREDICTED: uncharacterized protein LOC105557704 [Vollenhovia emeryi]	0.246703	-18.4191	4.18675	-4.39939	1.08556e-05	0.00126661
Contig38152	ref|XP_011169061.1| PREDICTED: prohormone-4 [Solenopsis invicta]	0.574838	-18.4176	4.18472	-4.40116	1.07672e-05	0.00126103
Contig65462	#N/A	0.228938	-18.4144	4.19665	-4.38789	1.14455e-05	0.00131481
Contig103354	#N/A	0.702624	-18.4123	4.18408	-4.40056	1.07972e-05	0.00126187
Contig70082	#N/A	14.9698	-18.412	4.19008	-4.39418	1.11194e-05	0.00128676
Contig17556	ref|XP_011872944.1| PREDICTED: sodium- and chloride-dependent glycine transporter 1-like isoform X1 [Vollenhovia emeryi]	30.1815	-18.4112	4.19095	-4.39308	1.11757e-05	0.00129116
Contig99968	#N/A	0.235281	-18.4023	4.18723	-4.39486	1.10843e-05	0.00128375
Contig8174	ref|XP_011703931.1| PREDICTED: protein FAN isoform X2 [Wasmannia auropunctata]	0.52012	-18.4013	4.18567	-4.39625	1.10137e-05	0.00127767
Contig75922	#N/A	1.27783	-18.4006	4.18429	-4.39755	1.09482e-05	0.00127321
Contig96592	#N/A	2.0405	-18.3919	3.63972	-5.05311	4.34664e-07	9.61138e-05
Contig82883	#N/A	0.48131	-18.3909	4.20208	-4.37662	1.20535e-05	0.00135892
Contig24630	#N/A	0.307466	-18.3875	4.18121	-4.39764	1.09435e-05	0.00127321
Contig86373	ref|XP_011880603.1| PREDICTED: GPI ethanolamine phosphate transferase 1-like [Vollenhovia emeryi]	0.518927	-18.3791	4.18432	-4.39237	1.12123e-05	0.00129327
Contig60574	ref|XP_017042292.1| PREDICTED: chaperone protein ClpB-like, partial [Drosophila ficusphila]	1.06069	-18.3767	4.17569	-4.40089	1.0781e-05	0.00126103
Contig43980	#N/A	0.489454	-18.3762	4.17822	-4.39808	1.09211e-05	0.00127215
Contig96419	#N/A	0.391252	-18.3629	4.18484	-4.38796	1.1442e-05	0.00131481
Contig149201	#N/A	0.218156	-18.3626	4.18825	-4.38431	1.16353e-05	0.0013312
Contig78582	#N/A	0.263733	-18.3608	4.18722	-4.38497	1.16e-05	0.00132824
Contig28053	#N/A	0.498784	-18.3607	4.17428	-4.39853	1.08987e-05	0.00127059
Contig97269	ref|XP_015375101.1| PREDICTED: uncharacterized protein LOC107169770 [Diuraphis noxia]	6.37563	-18.3581	4.19797	-4.3731	1.22496e-05	0.00137258
Contig54821	#N/A	0.412495	-18.3541	4.18485	-4.38585	1.15536e-05	0.001324
Contig139808	#N/A	0.279737	-18.3475	4.1857	-4.38339	1.16849e-05	0.00133324
Contig88012	ref|XP_017067260.1| PREDICTED: ferrous iron transport protein B homolog [Drosophila eugracilis]	0.350908	-18.3458	4.18508	-4.38361	1.16731e-05	0.00133324
Contig88290	#N/A	0.33158	-18.3345	4.18599	-4.37998	1.1869e-05	0.00134595
Contig142156	#N/A	1.10695	-18.3315	4.18863	-4.37649	1.20603e-05	0.00135892
Contig20022	ref|XP_012543046.1| PREDICTED: uncharacterized protein LOC105840611 isoform X1 [Monomorium pharaonis]	1.11224	-18.329	4.16456	-4.40118	1.07662e-05	0.00126103
Contig96899	#N/A	0.319901	-18.3279	4.18624	-4.37813	1.197e-05	0.00135341
Contig87318	ref|XP_013199906.1| PREDICTED: spermatogenesis-associated protein 20 isoform X4 [Amyelois transitella]	0.401082	-18.3232	4.18087	-4.38263	1.17254e-05	0.00133445
Contig71937	#N/A	0.366708	-18.3222	4.18085	-4.38241	1.17373e-05	0.00133445
Contig93830	#N/A	0.530202	-18.3156	4.16736	-4.39502	1.10762e-05	0.00128375
Contig70644	#N/A	0.270882	-18.3126	4.18719	-4.37347	1.22285e-05	0.00137239
Contig85143	#N/A	0.270882	-18.3126	4.18719	-4.37347	1.22285e-05	0.00137239
Contig90044	ref|XP_011158740.1| PREDICTED: LIM/homeobox protein Lhx5-like isoform X2 [Solenopsis invicta]	0.34787	-18.3069	4.18112	-4.37846	1.1952e-05	0.00135319
Contig71706	#N/A	0.568103	-18.3044	4.18093	-4.37808	1.19731e-05	0.00135341
Contig89910	#N/A	0.497524	-18.3042	4.18204	-4.37687	1.20397e-05	0.00135877
Contig39952	ref|XP_011860711.1| PREDICTED: ralA-binding protein 1 [Vollenhovia emeryi]	3.02051	-18.3027	4.19013	-4.36806	1.25355e-05	0.00139216
Contig91372	#N/A	0.234759	-18.2941	4.18725	-4.36901	1.24814e-05	0.00138821
Contig116009	#N/A	0.433887	-18.2924	4.17728	-4.37902	1.19213e-05	0.0013508
Contig145808	#N/A	0.450104	-18.2882	4.18333	-4.37168	1.23296e-05	0.00138045
Contig87834	ref|XP_011860408.1| PREDICTED: ribosomal protein S6 kinase 2 beta [Vollenhovia emeryi]	1.50961	-18.2811	4.18269	-4.37067	1.23867e-05	0.00138246
Contig135465	#N/A	0.235395	-18.2808	4.18294	-4.37032	1.24065e-05	0.0013825
Contig45172	ref|XP_012246086.1| PREDICTED: synaptic vesicle 2-related protein-like [Bombus impatiens]	0.46901	-18.2745	4.18564	-4.36601	1.26536e-05	0.00140009
Contig45745	#N/A	0.270574	-18.2668	4.1827	-4.36723	1.25835e-05	0.00139561
Contig12754	#N/A	1.0731	-18.2646	4.17823	-4.37137	1.23472e-05	0.00138133
Contig88888	#N/A	0.311627	-18.2608	4.1862	-4.36214	1.28796e-05	0.00141843
Contig31489	#N/A	0.513623	-18.2593	4.17317	-4.3754	1.2121e-05	0.00136359
Contig134129	ref|XP_011067144.1| PREDICTED: dnaJ homolog subfamily C member 13 [Acromyrmex echinatior]	5.05165	-18.2519	4.19018	-4.35588	1.32532e-05	0.00144497
Contig45876	#N/A	0.342261	-18.2462	4.18583	-4.35904	1.30632e-05	0.00143253
Contig32106	#N/A	0.30902	-18.2377	4.18609	-4.35673	1.32018e-05	0.00144379
Contig68801	#N/A	0.250807	-18.2372	4.18901	-4.35358	1.33931e-05	0.00145234
Contig81373	#N/A	0.300221	-18.2339	4.18619	-4.35574	1.32619e-05	0.00144497
Contig46548	ref|XP_011859467.1| PREDICTED: uncharacterized protein LOC105556962 [Vollenhovia emeryi]	0.370892	-18.2248	4.18587	-4.35389	1.33745e-05	0.00145202
Contig91555	ref|XP_011636880.1| PREDICTED: uncharacterized protein LOC105427043 [Pogonomyrmex barbatus]	0.29919	-18.2197	4.18069	-4.35807	1.31217e-05	0.00143614
Contig81005	ref|XP_011162055.1| PREDICTED: PDZ domain-containing protein GIPC3 isoform X1 [Solenopsis invicta]	0.795231	-18.2193	4.18371	-4.35481	1.33181e-05	0.00144849
Contig67309	#N/A	0.333005	-18.2126	4.18532	-4.35154	1.35184e-05	0.0014581
Contig25423	#N/A	0.85123	-18.212	4.17742	-4.35963	1.30282e-05	0.00143145
Contig81992	ref|XP_011702828.1| PREDICTED: probable E3 ubiquitin-protein ligase HERC3 [Wasmannia auropunctata]	0.387836	-18.2119	4.18483	-4.35187	1.34981e-05	0.00145781
Contig45692	#N/A	0.399314	-18.2027	4.18822	-4.34617	1.38534e-05	0.0014837
Contig65307	#N/A	0.362136	-18.2012	4.18636	-4.34774	1.37546e-05	0.00147691
Contig75917	#N/A	0.236765	-18.1974	4.18824	-4.34487	1.39358e-05	0.00148948
Contig90693	ref|XP_011698761.1| PREDICTED: nitric oxide-associated protein 1 [Wasmannia auropunctata]	0.236765	-18.1974	4.18824	-4.34487	1.39358e-05	0.00148948
Contig149948	#N/A	0.255833	-18.1955	4.18278	-4.35011	1.36071e-05	0.00146543
Contig46204	#N/A	0.253876	-18.1938	4.18446	-4.34794	1.37423e-05	0.00147691
Contig99054	#N/A	0.284836	-18.1866	4.18301	-4.34773	1.37555e-05	0.00147691
Contig81328	#N/A	0.297625	-18.1812	4.20208	-4.32672	1.51347e-05	0.00157358
Contig82333	#N/A	0.341742	-18.1757	4.18582	-4.34221	1.41059e-05	0.00150232
Contig80088	#N/A	0.352807	-18.1752	4.19184	-4.33586	1.45193e-05	0.00153443
Contig63389	#N/A	0.279138	-18.1736	4.18721	-4.34028	1.42304e-05	0.00150955
Contig22966	#N/A	0.344666	-18.1729	4.18058	-4.34699	1.38016e-05	0.00147961
Contig34931	ref|XP_011867475.1| PREDICTED: spermatogenesis-associated protein 6 [Vollenhovia emeryi]	0.306261	-18.1679	4.18717	-4.33895	1.43167e-05	0.00151601
Contig67074	#N/A	0.451225	-18.1673	4.18426	-4.34183	1.41304e-05	0.00150232
Contig33372	ref|XP_011705675.1| PREDICTED: transmembrane protein 43 homolog isoform X2 [Wasmannia auropunctata]	0.723847	-18.1602	4.1839	-4.3405	1.4216e-05	0.00150915
Contig96998	#N/A	0.524398	-18.1585	4.17181	-4.35267	1.34492e-05	0.00145731
Contig87239	#N/A	0.310355	-18.1521	4.20069	-4.32123	1.55162e-05	0.0016038
Contig86271	#N/A	0.277556	-18.1498	4.18018	-4.34187	1.41276e-05	0.00150232
Contig40043	#N/A	0.284247	-18.1412	4.1852	-4.33462	1.46013e-05	0.00153795
Contig90877	#N/A	0.538291	-18.1379	4.1845	-4.33453	1.46071e-05	0.00153795
Contig74823	#N/A	0.276915	-18.1298	4.18934	-4.32761	1.50735e-05	0.00156952
Contig22066	ref|XP_009055741.1| hypothetical protein LOTGIDRAFT_215945 [Lottia gigantea]	0.465722	-18.1235	4.18432	-4.3313	1.48234e-05	0.00155609
Contig46198	#N/A	0.329264	-18.1215	4.18865	-4.32634	1.51609e-05	0.00157514
Contig45519	#N/A	0.333591	-18.1208	4.18655	-4.32834	1.50239e-05	0.00156952
Contig138337	ref|XP_011874272.1| PREDICTED: probable GPI-anchored adhesin-like protein PGA55 [Vollenhovia emeryi]	0.327165	-18.1188	4.18519	-4.32927	1.49604e-05	0.00156582
Contig56156	ref|XP_011860276.1| PREDICTED: uncharacterized protein LOC105557606 [Vollenhovia emeryi]	0.268745	-18.116	4.18658	-4.32716	1.51047e-05	0.00157161
Contig138555	ref|XP_011696806.1| PREDICTED: ankyrin repeat and zinc finger domain-containing protein 1-like isoform X1 [Wasmannia auropunctata]	0.740608	-18.1104	4.18363	-4.32888	1.49872e-05	0.00156747
Contig96144	ref|XP_011568119.1| PREDICTED: uncharacterized protein LOC105397800 [Plutella xylostella]	0.472182	-18.1075	4.18405	-4.32775	1.50641e-05	0.00156952
Contig76881	ref|XP_017063185.1| PREDICTED: uncharacterized protein HI_1663-like [Drosophila eugracilis]	0.682217	-18.1066	4.18366	-4.32793	1.50516e-05	0.00156952
Contig33072	#N/A	0.329697	-18.1022	4.1872	-4.32322	1.53768e-05	0.00159405
Contig71662	#N/A	0.354623	-18.0973	4.17719	-4.33241	1.47488e-05	0.0015506
Contig131644	#N/A	0.343276	-18.0911	4.20069	-4.3067	1.65711e-05	0.00167517
Contig65387	#N/A	0.373947	-18.0897	4.18459	-4.32294	1.53967e-05	0.00159494
Contig70403	ref|XP_017090312.1| PREDICTED: tyrosine--tRNA ligase-like [Drosophila bipectinata]	0.40084	-18.0868	4.18818	-4.31852	1.57077e-05	0.00161532
Contig79174	#N/A	0.772945	-18.084	4.17659	-4.32985	1.4921e-05	0.00156285
Contig85965	#N/A	0.39651	-18.0793	4.18556	-4.31944	1.56427e-05	0.00161451
Contig42576	#N/A	0.245748	-18.07	4.18673	-4.31602	1.58867e-05	0.00162865
Contig44364	ref|XP_012525531.1| PREDICTED: uncharacterized protein LOC105830633 [Monomorium pharaonis]	0.243388	-18.0683	4.18864	-4.31365	1.60582e-05	0.00163588
Contig136837	ref|XP_011864607.1| PREDICTED: la-related protein 6 [Vollenhovia emeryi]	2.58541	-18.0641	4.1771	-4.32457	1.52833e-05	0.00158668
Contig81585	#N/A	0.301005	-18.0626	4.18536	-4.31566	1.59126e-05	0.00162928
Contig80216	#N/A	0.260073	-18.0565	4.18071	-4.319	1.56737e-05	0.00161523
Contig90616	ref|XP_011694348.1| PREDICTED: transmembrane protein adipocyte-associated 1 homolog isoform X2 [Wasmannia auropunctata]	4.43117	-18.0518	4.0635	-4.44242	8.89508e-06	0.00109768
Contig55476	#N/A	0.33482	-18.0505	4.18534	-4.31279	1.61208e-05	0.00163946
Contig46782	#N/A	0.363536	-18.0463	4.18772	-4.30934	1.63739e-05	0.00166087
Contig45871	#N/A	0.2391	-18.0448	4.18998	-4.30665	1.65742e-05	0.00167517
Contig69105	ref|XP_012535186.1| PREDICTED: glutamate-gated chloride channel-like isoform X10 [Monomorium pharaonis]	0.276656	-18.0344	4.18883	-4.30534	1.66726e-05	0.00167911
Contig85202	ref|XP_011665893.1| PREDICTED: uncharacterized protein K02A2.6-like [Strongylocentrotus purpuratus]	0.26323	-18.0334	4.18147	-4.31269	1.61281e-05	0.00163946
Contig103127	#N/A	0.52257	-18.0298	4.18527	-4.30791	1.64803e-05	0.00166926
Contig127368	#N/A	0.330081	-18.0291	4.18562	-4.30738	1.65198e-05	0.00167206
Contig41216	#N/A	0.345171	-18.0241	4.19958	-4.29189	1.7716e-05	0.0017505
Contig75612	#N/A	0.422933	-18.0189	4.18508	-4.30551	1.66605e-05	0.00167908
Contig38878	#N/A	0.773298	-18.0113	4.17374	-4.31537	1.59334e-05	0.00163022
Contig95983	#N/A	0.364687	-18.0031	4.18511	-4.3017	1.69491e-05	0.0017009
Contig67456	ref|XP_011870333.1| PREDICTED: exonuclease mut-7 homolog isoform X1 [Vollenhovia emeryi]	1.27323	-18.0027	4.19032	-4.29626	1.73702e-05	0.0017272
Contig148586	#N/A	0.298904	-17.9997	4.2	-4.28566	1.82201e-05	0.00178593
Contig13498	#N/A	0.789737	-17.9957	4.1918	-4.29306	1.76225e-05	0.0017437
Contig92864	#N/A	0.298536	-17.9913	4.18231	-4.30175	1.69457e-05	0.0017009
Contig32392	#N/A	0.276951	-17.9836	4.18722	-4.29487	1.74793e-05	0.00173439
Contig120514	#N/A	0.416521	-17.9827	4.18115	-4.3009	1.70105e-05	0.00170367
Contig38043	#N/A	0.224146	-17.9786	4.18726	-4.29363	1.75774e-05	0.00174046
Contig70115	ref|XP_011879644.1| PREDICTED: uncharacterized protein LOC105568521, partial [Vollenhovia emeryi]	0.913196	-17.9759	4.19844	-4.28157	1.85581e-05	0.00180777
Contig45510	ref|XP_011865370.1| PREDICTED: 1-phosphatidylinositol 4,5-bisphosphate phosphodiesterase gamma-1 isoform X3 [Vollenhovia emeryi]	0.366092	-17.9754	4.19177	-4.28826	1.80078e-05	0.00177314
Contig68724	#N/A	0.829791	-17.9747	4.17731	-4.30294	1.68544e-05	0.00169494
Contig65362	ref|XP_012223904.1| PREDICTED: LOW QUALITY PROTEIN: sterile alpha and TIR motif-containing protein 1 [Linepithema humile]	0.210347	-17.9646	4.18726	-4.29031	1.78426e-05	0.00176055
Contig93734	#N/A	0.210347	-17.9646	4.18726	-4.29031	1.78426e-05	0.00176055
Contig84115	ref|XP_011702509.1| PREDICTED: run domain Beclin-1 interacting and cysteine-rich containing protein [Wasmannia auropunctata]	1.40771	-17.9622	4.19038	-4.28653	1.81489e-05	0.00178206
Contig47559	ref|XP_014228684.1| PREDICTED: aspartate aminotransferase, mitochondrial [Trichogramma pretiosum]	0.271345	-17.9502	4.18726	-4.28685	1.81221e-05	0.00178067
Contig105696	ref|XP_011695841.1| PREDICTED: adenomatous polyposis coli protein-like [Wasmannia auropunctata]	0.488397	-17.9469	4.19115	-4.28211	1.8513e-05	0.00180651
Contig127176	#N/A	0.286269	-17.9439	4.18571	-4.28694	1.8115e-05	0.00178067
Contig46578	ref|XP_004925487.1| PREDICTED: aminoacylase-1-like isoform X1 [Bombyx mori]	1.32395	-17.942	4.17731	-4.2951	1.74615e-05	0.00173384
Contig134456	ref|XP_011161570.1| PREDICTED: solute carrier family 2, facilitated glucose transporter member 8 [Solenopsis invicta]	0.470119	-17.9413	4.18017	-4.29201	1.77062e-05	0.0017505
Contig112004	ref|XP_011874806.1| PREDICTED: uncharacterized protein LOC105565871 [Vollenhovia emeryi]	1.0359	-17.9365	4.19213	-4.27863	1.88049e-05	0.00182799
Contig128127	ref|XP_011874297.1| PREDICTED: testis-expressed sequence 9 protein [Vollenhovia emeryi]	1.78012	-17.9293	4.16972	-4.29989	1.70886e-05	0.00170641
Contig119230	ref|XP_012543515.1| PREDICTED: uncharacterized protein LOC105840971, partial [Monomorium pharaonis]	0.206579	-17.9242	4.19303	-4.27477	1.91336e-05	0.00184511
Contig394	#N/A	1.11516	-17.9231	4.19069	-4.27689	1.89519e-05	0.00183559
Contig148749	ref|XP_012218253.1| PREDICTED: THAP domain-containing protein 4-like [Linepithema humile]	0.403003	-17.9217	4.19135	-4.27586	1.90399e-05	0.00183888
Contig53226	ref|XP_011566640.1| PREDICTED: uncharacterized protein LOC105396341 [Plutella xylostella]	0.662081	-17.9132	4.17145	-4.29423	1.753e-05	0.00173698
Contig128534	#N/A	0.384792	-17.9087	4.1857	-4.27856	1.88107e-05	0.00182799
Contig96911	ref|XP_011706332.1| PREDICTED: pilosulin-3a-like [Wasmannia auropunctata]	1.218	-17.905	4.20208	-4.26098	2.03535e-05	0.00192625
Contig48449	ref|XP_003699101.1| PREDICTED: 50S ribosomal protein L14, chloroplastic-like [Apis florea]	0.230655	-17.904	4.18722	-4.27587	1.90393e-05	0.00183888
Contig117255	#N/A	0.449349	-17.9027	4.19115	-4.27154	1.94126e-05	0.001868
Contig129351	#N/A	0.224701	-17.8989	4.1893	-4.27253	1.93268e-05	0.0018615
Contig44901	ref|XP_012542951.1| PREDICTED: elongation factor Tu, cyanelle-like [Monomorium pharaonis]	0.752124	-17.8914	4.18267	-4.27751	1.88992e-05	0.00183281
Contig112118	#N/A	1.66665	-17.8903	3.3262	-5.37862	7.50598e-08	2.33093e-05
Contig67006	ref|XP_011871560.1| PREDICTED: helicase POLQ-like [Vollenhovia emeryi]	1.01781	-17.8893	4.19053	-4.26898	1.9637e-05	0.0018824
Contig74969	#N/A	0.44333	-17.8734	4.1855	-4.27031	1.95202e-05	0.00187502
Contig48195	#N/A	0.274285	-17.8718	4.18881	-4.26656	1.98514e-05	0.00189013
Contig128316	#N/A	0.303969	-17.8698	4.18669	-4.26824	1.97018e-05	0.00188267
Contig118001	#N/A	0.417784	-17.8588	4.18515	-4.26718	1.97961e-05	0.00188613
Contig120204	#N/A	2.21789	-17.858	4.18825	-4.26383	2.00949e-05	0.00190816
Contig135370	#N/A	0.294072	-17.8566	4.1861	-4.26568	1.99295e-05	0.00189501
Contig135412	#N/A	0.253942	-17.8548	4.2	-4.25116	2.12669e-05	0.00199135
Contig147737	ref|XP_011873116.1| PREDICTED: golgin subfamily A member 2 [Vollenhovia emeryi]	0.954977	-17.8503	4.19079	-4.25941	2.04969e-05	0.00193455
Contig71797	ref|XP_005095160.2| PREDICTED: long-chain-fatty-acid--CoA ligase 5-like [Aplysia californica]	1.28316	-17.8336	4.18487	-4.26145	2.03106e-05	0.00192477
Contig33001	#N/A	0.258268	-17.8333	4.18667	-4.25955	2.04837e-05	0.00193455
Contig120694	#N/A	0.372387	-17.8297	4.18419	-4.2612	2.03329e-05	0.00192559
Contig37804	#N/A	0.404572	-17.8236	4.18485	-4.25908	2.05266e-05	0.00193455
Contig27970	ref|XP_011646196.1| PREDICTED: retinoid-inducible serine carboxypeptidase-like isoform X2 [Pogonomyrmex barbatus]	11.0882	-17.8227	4.18775	-4.25592	2.08191e-05	0.0019533
Contig86689	ref|XP_011064087.1| PREDICTED: mannose-6-phosphate isomerase isoform X2 [Acromyrmex echinatior]	0.306503	-17.8202	4.18538	-4.25773	2.06509e-05	0.00194268
Contig88903	#N/A	0.373374	-17.8132	4.18438	-4.25707	2.07125e-05	0.00194589
Contig133423	ref|XP_011684841.1| PREDICTED: FAD synthase-like isoform X1 [Wasmannia auropunctata]	2.8865	-17.8124	3.97018	-4.48656	7.23827e-06	0.000951391
Contig143229	#N/A	0.286268	-17.8119	4.20208	-4.23883	2.2469e-05	0.00206693
Contig147503	#N/A	24.8559	-17.8033	4.19903	-4.23986	2.23661e-05	0.00206148
Contig80280	ref|XP_011859007.1| PREDICTED: uncharacterized protein LOC105556520 [Vollenhovia emeryi]	0.306894	-17.7944	4.18718	-4.24973	2.14031e-05	0.00200013
Contig79304	#N/A	0.327635	-17.7803	4.18634	-4.24722	2.1644e-05	0.00201943
Contig82051	ref|XP_017064326.1| PREDICTED: transcriptional repressor NrdR-like [Drosophila eugracilis]	0.611981	-17.7754	4.17624	-4.25631	2.07825e-05	0.00195117
Contig76777	ref|XP_011862944.1| PREDICTED: uncharacterized protein LOC105559342 [Vollenhovia emeryi]	27.0597	-17.7637	4.19753	-4.23194	2.31682e-05	0.00210656
Contig69182	ref|XP_011171829.1| PREDICTED: uncharacterized protein LOC105204448 isoform X5 [Solenopsis invicta]	0.255626	-17.7615	4.18946	-4.23958	2.23942e-05	0.00206273
Contig126724	ref|XP_011060185.1| PREDICTED: uncharacterized protein LOC105149451 [Acromyrmex echinatior]	3.34693	-17.7615	4.17052	-4.25882	2.05508e-05	0.00193455
Contig65853	#N/A	0.737032	-17.7573	4.17278	-4.2555	2.08585e-05	0.0019557
Contig82718	ref|XP_016915682.1| PREDICTED: ubiquitin-conjugating enzyme E2-24 kDa [Apis cerana]	0.917345	-17.756	4.19074	-4.23697	2.26555e-05	0.00207372
Contig54055	#N/A	0.319511	-17.7491	4.18598	-4.24015	2.23375e-05	0.0020602
Contig130927	#N/A	0.215795	-17.7402	4.19269	-4.23122	2.32428e-05	0.00210792
Contig51765	#N/A	0.257372	-17.7378	4.18717	-4.23623	2.27302e-05	0.00207877
Contig137534	ref|XP_011638785.1| PREDICTED: cytochrome P450 4C1-like [Pogonomyrmex barbatus]	0.477594	-17.7351	4.18116	-4.24168	2.21857e-05	0.00204827
Contig65220	ref|XP_011566844.1| PREDICTED: ATP-dependent DNA helicase srs2-like [Plutella xylostella]	0.768018	-17.7271	4.17806	-4.2429	2.20653e-05	0.00204578
Contig82185	ref|XP_012063794.1| PREDICTED: B-cell CLL/lymphoma 7 protein family member B [Atta cephalotes]	0.917988	-17.7264	4.19237	-4.22826	2.35502e-05	0.00212761
Contig147177	ref|XP_011690764.1| PREDICTED: hydrocephalus-inducing protein homolog [Wasmannia auropunctata]	0.238556	-17.7254	4.18909	-4.23133	2.32314e-05	0.00210792
Contig96490	#N/A	0.223411	-17.7191	4.19024	-4.22866	2.35082e-05	0.00212568
Contig41228	#N/A	0.250146	-17.719	4.18641	-4.2325	2.31105e-05	0.00210402
Contig144340	ref|XP_011063962.1| PREDICTED: LOW QUALITY PROTEIN: uncharacterized protein LOC105151764 [Acromyrmex echinatior]	0.286447	-17.7172	4.2	-4.21839	2.46054e-05	0.00219903
Contig65508	#N/A	0.226396	-17.711	4.18632	-4.23067	2.32994e-05	0.00211034
Contig87349	#N/A	0.711778	-17.7064	4.18381	-4.23212	2.31495e-05	0.00210621
Contig63482	ref|XP_011699799.1| PREDICTED: SUN domain-containing ossification factor isoform X2 [Wasmannia auropunctata]	0.325185	-17.7018	4.1862	-4.22861	2.35138e-05	0.00212568
Contig66303	#N/A	0.787661	-17.6949	4.17771	-4.23555	2.27998e-05	0.00208379
Contig94271	ref|XP_012062045.1| PREDICTED: odorant receptor 43a-like [Atta cephalotes]	0.895569	-17.6916	4.17544	-4.23707	2.26457e-05	0.00207372
Contig45363	ref|XP_001949604.2| PREDICTED: maltase 1 [Acyrthosiphon pisum]	0.285394	-17.6897	4.18623	-4.22569	2.38214e-05	0.00214935
Contig66806	#N/A	0.264285	-17.6892	4.18898	-4.2228	2.41289e-05	0.00216457
Contig13189	#N/A	1.60266	-17.6827	4.18757	-4.22266	2.41432e-05	0.00216457
Contig75990	ref|XP_017118195.1| PREDICTED: probable DNA helicase II homolog [Drosophila elegans]	0.187357	-17.6819	4.19303	-4.21698	2.47599e-05	0.00220865
Contig49100	#N/A	0.44547	-17.6775	4.17631	-4.23281	2.30785e-05	0.00210246
Contig121868	ref|XP_014240031.1| PREDICTED: protein transport protein Sec61 subunit gamma [Cimex lectularius]	0.657013	-17.6744	4.17382	-4.23458	2.28978e-05	0.00208926
Contig65394	#N/A	0.200253	-17.6732	4.19269	-4.21525	2.49501e-05	0.00221861
Contig67885	#N/A	0.200253	-17.6732	4.19269	-4.21525	2.49501e-05	0.00221861
Contig37304	#N/A	0.260709	-17.6719	4.20208	-4.20552	2.60484e-05	0.00228181
Contig48948	#N/A	0.515923	-17.6672	4.17526	-4.2314	2.32236e-05	0.00210792
Contig90901	#N/A	0.262642	-17.659	4.18569	-4.2189	2.455e-05	0.00219547
Contig54017	#N/A	0.308492	-17.6505	4.19191	-4.21061	2.54683e-05	0.00224351
Contig46051	#N/A	0.566426	-17.6498	4.18197	-4.22045	2.43819e-05	0.0021832
Contig103346	ref|XP_012234439.1| PREDICTED: uncharacterized protein LOC105679152 [Linepithema humile]	0.628334	-17.649	4.19077	-4.21139	2.53802e-05	0.00223715
Contig96041	ref|XP_011879133.1| PREDICTED: pre-mRNA-splicing factor CWC25 homolog [Vollenhovia emeryi]	1.99968	-17.6483	4.17686	-4.22526	2.38661e-05	0.00215201
Contig57548	#N/A	0.649769	-17.6468	3.74423	-4.71307	2.44015e-06	0.000409484
Contig54700	ref|XP_017071107.1| PREDICTED: signal peptidase I-like, partial [Drosophila eugracilis]	0.722913	-17.6432	4.18656	-4.21426	2.506e-05	0.00222698
Contig16018	ref|XP_011871903.1| PREDICTED: uncharacterized protein LOC105564262 isoform X2 [Vollenhovia emeryi]	0.825855	-17.6303	4.19067	-4.20703	2.58751e-05	0.00227226
Contig40050	ref|XP_011163099.1| PREDICTED: uncharacterized protein LOC105198146 isoform X1 [Solenopsis invicta]	0.738812	-17.6239	4.19221	-4.20395	2.62294e-05	0.00229571
Contig142426	#N/A	0.248551	-17.6209	4.20596	-4.18951	2.79556e-05	0.00241151
Contig144227	#N/A	0.33509	-17.6196	4.18715	-4.20802	2.57616e-05	0.00226511
Contig95774	ref|YP_009019283.1| cytochrome b (mitochondrion) [Strongylocentrotus intermedius]	0.28649	-17.6123	4.18723	-4.20619	2.59714e-05	0.00227789
Contig72506	ref|XP_011176176.1| PREDICTED: uncharacterized protein LOC105208112 [Solenopsis invicta]	0.208962	-17.608	4.18991	-4.20248	2.64001e-05	0.0023069
Contig68032	#N/A	0.233813	-17.6079	4.18679	-4.20559	2.60399e-05	0.00228181
Contig111725	#N/A	0.263841	-17.5964	4.18576	-4.20386	2.62396e-05	0.00229571
Contig50791	#N/A	0.379213	-17.5893	4.18531	-4.20262	2.63849e-05	0.0023069
Contig78180	#N/A	0.26967	-17.5821	4.18546	-4.20076	2.66025e-05	0.00232315
Contig104671	#N/A	0.427767	-17.5807	4.18869	-4.19718	2.70261e-05	0.00234726
Contig65625	#N/A	0.374359	-17.5672	4.19178	-4.19088	2.7787e-05	0.0024043
Contig38902	#N/A	0.202631	-17.5476	4.19126	-4.18672	2.83011e-05	0.00243982
Contig3718	ref|XP_009019792.1| hypothetical protein HELRODRAFT_184986 [Helobdella robusta]	0.500167	-17.541	4.17705	-4.19939	2.6764e-05	0.00233504
Contig138307	ref|XP_011858724.1| PREDICTED: uncharacterized protein LOC105556248 isoform X2 [Vollenhovia emeryi]	0.275225	-17.5239	4.19214	-4.18017	2.9129e-05	0.00248992
Contig139526	#N/A	0.275225	-17.5239	4.19214	-4.18017	2.9129e-05	0.00248992
Contig147495	#N/A	0.275225	-17.5239	4.19214	-4.18017	2.9129e-05	0.00248992
Contig67783	#N/A	0.563801	-17.5222	4.17477	-4.19716	2.70281e-05	0.00234726
Contig69855	#N/A	0.746892	-17.518	4.1849	-4.18601	2.83901e-05	0.002446
Contig111584	ref|XP_011697972.1| PREDICTED: carnitine O-palmitoyltransferase 1, muscle isoform isoform X1 [Wasmannia auropunctata]	8.39995	-17.5148	4.19802	-4.17215	3.0174e-05	0.00255146
Contig123220	#N/A	0.279403	-17.514	4.19201	-4.17796	2.94141e-05	0.00249767
Contig115102	#N/A	0.250653	-17.5069	4.20208	-4.16626	3.09635e-05	0.00259242
Contig41611	ref|XP_011684841.1| PREDICTED: FAD synthase-like isoform X1 [Wasmannia auropunctata]	1.95914	-17.5065	4.19125	-4.17693	2.95474e-05	0.00250598
Contig39855	ref|XP_011696432.1| PREDICTED: uncharacterized protein C4orf29 isoform X1 [Wasmannia auropunctata]	0.200605	-17.5042	4.1883	-4.17931	2.92399e-05	0.00249638
Contig124023	#N/A	0.226806	-17.504	4.18719	-4.18036	2.91047e-05	0.00248992
Contig93853	ref|XP_011169438.1| PREDICTED: fatty acid synthase-like [Solenopsis invicta]	0.323977	-17.4914	4.18703	-4.17751	2.94712e-05	0.00250102
Contig41485	#N/A	1.9154	-17.4883	4.11768	-4.24713	2.16525e-05	0.00201943
Contig120060	#N/A	0.461101	-17.4874	4.17863	-4.18496	2.85218e-05	0.00245075
Contig77053	ref|XP_011691989.1| PREDICTED: protein lap4 isoform X2 [Wasmannia auropunctata]	0.64865	-17.4867	4.17775	-4.18567	2.84327e-05	0.00244692
Contig66473	ref|XP_011879931.1| PREDICTED: glutamate receptor ionotropic, kainate 2-like [Vollenhovia emeryi]	0.456654	-17.4767	4.19118	-4.16987	3.04777e-05	0.00256486
Contig85907	#N/A	0.202318	-17.4721	4.18728	-4.17266	3.01067e-05	0.0025473
Contig128551	#N/A	0.234239	-17.4665	4.19235	-4.16627	3.09617e-05	0.00259242
Contig103904	#N/A	0.550537	-17.4621	4.19108	-4.16649	3.09331e-05	0.00259242
Contig63951	ref|XP_012055967.1| PREDICTED: nucleosome assembly protein 1-like 1-B [Atta cephalotes]	0.588489	-17.4614	4.17354	-4.18384	2.86622e-05	0.00246044
Contig33496	#N/A	0.208057	-17.461	4.18688	-4.17041	3.04049e-05	0.00256334
Contig1525	ref|XP_012532092.1| PREDICTED: uncharacterized protein LOC105834282 [Monomorium pharaonis]	0.17645	-17.4606	4.18995	-4.16725	3.0829e-05	0.00259134
Contig115212	#N/A	0.436527	-17.4572	4.1764	-4.17997	2.91545e-05	0.00249059
Contig125031	ref|XP_011708245.1| PREDICTED: FAS-associated factor 1 isoform X3 [Wasmannia auropunctata]	0.633047	-17.455	4.19104	-4.16484	3.11571e-05	0.00260344
Contig78274	#N/A	0.813693	-17.4531	4.17722	-4.17817	2.93861e-05	0.00249741
Contig119044	ref|XP_004213329.1| PREDICTED: histone-lysine N-methyltransferase SETMAR-like, partial [Hydra vulgaris]	0.628715	-17.4513	4.1784	-4.17657	2.95942e-05	0.00250844
Contig101793	ref|XP_011858452.1| PREDICTED: uncharacterized protein LOC105556005, partial [Vollenhovia emeryi]	0.246337	-17.4417	4.18661	-4.16608	3.09889e-05	0.00259244
Contig122756	ref|XP_012527246.1| PREDICTED: integrator complex subunit 9 [Monomorium pharaonis]	0.302256	-17.4385	4.18985	-4.16207	3.15371e-05	0.00262741
Contig54367	ref|XP_012349699.1| PREDICTED: uncharacterized glycosyl hydrolase C11E10.09c-like, partial [Apis florea]	0.55952	-17.4378	4.18413	-4.1676	3.07821e-05	0.00258894
Contig90856	#N/A	0.406658	-17.4354	4.20069	-4.15059	3.31613e-05	0.00273691
Contig46839	#N/A	0.237693	-17.4276	4.18911	-4.16021	3.17955e-05	0.00264298
Contig73079	ref|XP_011702293.1| PREDICTED: neuropeptide-like protein 32 [Wasmannia auropunctata]	0.227038	-17.4216	4.1865	-4.16138	3.16329e-05	0.0026323
Contig62577	#N/A	0.85945	-17.4212	4.20405	-4.14392	3.4142e-05	0.00280637
Contig87553	ref|XP_011873544.1| PREDICTED: hybrid signal transduction histidine kinase L isoform X1 [Vollenhovia emeryi]	3.60846	-17.4104	4.1826	-4.16258	3.14669e-05	0.00262311
Contig80274	ref|XP_012236001.1| PREDICTED: uncharacterized protein LOC105680119 [Linepithema humile]	0.452857	-17.4064	4.17389	-4.17031	3.04182e-05	0.00256334
Contig95980	#N/A	0.207795	-17.3988	4.1901	-4.15237	3.29048e-05	0.0027221
Contig34586	#N/A	0.411518	-17.3949	4.18128	-4.16019	3.17988e-05	0.00264298
Contig41842	#N/A	0.24317	-17.3887	4.1863	-4.15371	3.27121e-05	0.00271092
Contig76830	#N/A	0.25285	-17.3691	4.19283	-4.14257	3.43432e-05	0.00281947
Contig32544	#N/A	0.293065	-17.3685	4.18916	-4.14605	3.38266e-05	0.00278369
Contig106022	#N/A	0.208693	-17.3569	4.19303	-4.13946	3.48131e-05	0.00284993
Contig33530	ref|XP_016037401.1| ATPsyn-beta [Drosophila simulans]	0.891017	-17.3568	4.19149	-4.14096	3.45849e-05	0.00283454
Contig92133	ref|XP_009048959.1| hypothetical protein LOTGIDRAFT_140877, partial [Lottia gigantea]	1.65087	-17.3528	3.31075	-5.24136	1.59399e-07	4.21473e-05
Contig80308	#N/A	0.310816	-17.3515	4.19191	-4.13928	3.48394e-05	0.00285043
Contig63539	#N/A	0.611049	-17.3469	4.18355	-4.14647	3.37646e-05	0.00278021
Contig136592	ref|XP_012221592.1| PREDICTED: leishmanolysin-like peptidase [Linepithema humile]	0.446783	-17.3461	4.19132	-4.13858	3.4946e-05	0.0028542
Contig104793	ref|XP_011172510.1| PREDICTED: uncharacterized protein LOC105204926, partial [Solenopsis invicta]	0.234914	-17.3416	4.19269	-4.13616	3.53167e-05	0.0028745
Contig63286	#N/A	0.312676	-17.3412	4.18813	-4.14056	3.46457e-05	0.00283788
Contig72891	#N/A	0.482988	-17.3347	4.17514	-4.15189	3.2974e-05	0.00272623
Contig86934	#N/A	0.527204	-17.3308	4.18809	-4.13812	3.50164e-05	0.00285665
Contig99521	ref|XP_012057279.1| PREDICTED: small integral membrane protein 13 [Atta cephalotes]	0.496584	-17.3302	4.1993	-4.12692	3.67654e-05	0.00295897
Contig102565	ref|XP_012055686.1| PREDICTED: LOW QUALITY PROTEIN: elongation factor 1-gamma [Atta cephalotes]	0.281206	-17.33	4.18825	-4.13777	3.50705e-05	0.00285941
Contig79156	ref|XP_011566994.1| PREDICTED: methylthioribulose-1-phosphate dehydratase-like [Plutella xylostella]	0.848292	-17.3253	4.19083	-4.1341	3.56347e-05	0.00289372
Contig97570	ref|XP_017045460.1| PREDICTED: uvrABC system protein A-like [Drosophila ficusphila]	0.477063	-17.3064	4.19105	-4.12937	3.63754e-05	0.00294035
Contig90400	ref|XP_012217815.1| PREDICTED: uncharacterized protein LOC105669428 [Linepithema humile]	0.57759	-17.3009	4.20208	-4.11722	3.8347e-05	0.00304368
Contig94463	#N/A	0.371188	-17.3008	4.18405	-4.13494	3.55042e-05	0.00288644
Contig70346	#N/A	0.403687	-17.3004	4.19149	-4.12751	3.66713e-05	0.0029575
Contig49611	#N/A	0.319989	-17.299	4.18015	-4.13836	3.4979e-05	0.00285525
Contig103757	#N/A	0.495358	-17.2974	4.19111	-4.12716	3.67266e-05	0.00295897
Contig85754	ref|XP_012528039.1| PREDICTED: intraflagellar transport protein 80 homolog [Monomorium pharaonis]	1.70002	-17.2969	4.17552	-4.14245	3.43611e-05	0.00281947
Contig91351	#N/A	0.688971	-17.2966	4.19104	-4.12704	3.67469e-05	0.00295897
Contig53220	#N/A	0.63791	-17.2961	3.8387	-4.50573	6.6145e-06	0.000885885
Contig98658	#N/A	0.202787	-17.293	4.19269	-4.12455	3.71461e-05	0.00298557
Contig12245	ref|XP_017117665.1| PREDICTED: S-(hydroxymethyl)glutathione dehydrogenase [Drosophila elegans]	0.755877	-17.2919	4.1912	-4.12576	3.69512e-05	0.0029716
Contig59140	ref|XP_011865488.1| PREDICTED: uncharacterized protein LOC105560735 [Vollenhovia emeryi]	0.15324	-17.2907	4.19506	-4.12169	3.76099e-05	0.00300235
Contig61750	#N/A	0.15324	-17.2907	4.19506	-4.12169	3.76099e-05	0.00300235
Contig62580	ref|XP_008188885.1| PREDICTED: mannonate dehydratase-like, partial [Acyrthosiphon pisum]	0.15324	-17.2907	4.19506	-4.12169	3.76099e-05	0.00300235
Contig109595	ref|XP_011861203.1| PREDICTED: intraflagellar transport protein 80 homolog isoform X1 [Vollenhovia emeryi]	0.261899	-17.2875	4.192	-4.12392	3.72474e-05	0.00299201
Contig49069	#N/A	0.594045	-17.2846	4.17751	-4.13754	3.51045e-05	0.00286053
Contig62890	ref|XP_012249030.1| PREDICTED: uncharacterized protein LOC105681967 [Bombus impatiens]	0.659027	-17.2834	4.18062	-4.13417	3.5624e-05	0.00289372
Contig98900	#N/A	0.247251	-17.2829	4.20208	-4.11295	3.90641e-05	0.00308474
Contig46529	#N/A	0.196271	-17.2825	4.19269	-4.12205	3.7552e-05	0.00300235
Contig51970	ref|XP_014212662.1| PREDICTED: uncharacterized protein LOC106642398 [Copidosoma floridanum]	0.196271	-17.2825	4.19269	-4.12205	3.7552e-05	0.00300235
Contig92199	#N/A	1.23002	-17.2777	4.17738	-4.13601	3.53397e-05	0.00287472
Contig59617	#N/A	0.438797	-17.2663	4.19196	-4.11891	3.80674e-05	0.00303544
Contig38222	#N/A	0.48427	-17.2636	4.19123	-4.11898	3.80549e-05	0.00303544
Contig59743	ref|XP_012542909.1| PREDICTED: type-1 glutamine synthetase 1-like [Monomorium pharaonis]	0.313687	-17.2528	4.1918	-4.11584	3.8577e-05	0.0030571
Contig86769	#N/A	0.313687	-17.2528	4.1918	-4.11584	3.8577e-05	0.0030571
Contig77917	ref|XP_011875304.1| PREDICTED: fatty acid synthase-like [Vollenhovia emeryi]	2.29163	-17.2514	3.20844	-5.37689	7.57837e-08	2.34311e-05
Contig98019	ref|XP_011871575.1| PREDICTED: major facilitator superfamily domain-containing protein 6 [Vollenhovia emeryi]	2.34675	-17.249	4.18958	-4.11711	3.83646e-05	0.00304368
Contig10446	#N/A	0.210009	-17.2469	4.19303	-4.11324	3.90145e-05	0.00308474
Contig47800	ref|XP_003691695.1| PREDICTED: hypoxanthine-guanine phosphoribosyltransferase-like [Apis florea]	0.210009	-17.2469	4.19303	-4.11324	3.90145e-05	0.00308474
Contig68712	ref|XP_014259937.1| PREDICTED: glycerol kinase-like [Cimex lectularius]	0.210009	-17.2469	4.19303	-4.11324	3.90145e-05	0.00308474
Contig62402	#N/A	0.566527	-17.2465	4.20208	-4.10429	4.05559e-05	0.00317124
Contig40518	#N/A	0.738747	-17.2325	4.17977	-4.12283	3.74248e-05	0.00299682
Contig82314	#N/A	0.294627	-17.2157	4.18389	-4.11475	3.87596e-05	0.00306985
Contig104092	ref|XP_011865196.1| PREDICTED: uncharacterized protein LOC105560578 isoform X1 [Vollenhovia emeryi]	0.30955	-17.214	4.1865	-4.11179	3.92605e-05	0.00309564
Contig69773	ref|XP_011173162.1| PREDICTED: calpain-C [Solenopsis invicta]	0.287539	-17.2135	4.19191	-4.10637	4.01918e-05	0.00315675
Contig101413	#N/A	0.178822	-17.2055	4.19338	-4.10301	4.07804e-05	0.00318351
Contig140326	#N/A	0.226026	-17.2031	4.1868	-4.1089	3.97545e-05	0.00312761
Contig72909	#N/A	0.342521	-17.2031	4.19136	-4.10442	4.05332e-05	0.00317124
Contig75786	#N/A	0.173867	-17.1906	4.19	-4.10276	4.08254e-05	0.00318526
Contig43611	#N/A	0.524389	-17.181	4.18525	-4.10513	4.04092e-05	0.00316678
Contig46966	#N/A	0.221622	-17.179	4.18672	-4.10322	4.07435e-05	0.00318238
Contig68767	#N/A	0.439232	-17.1652	4.19173	-4.09502	4.2213e-05	0.00326826
Contig81493	#N/A	0.69755	-17.1627	4.18452	-4.10148	4.10525e-05	0.0032008
Contig90941	#N/A	0.231118	-17.1595	4.19234	-4.09306	4.25726e-05	0.00328709
Contig145389	ref|XP_011173019.1| PREDICTED: uncharacterized protein LOC105205364 [Solenopsis invicta]	0.20896	-17.1568	4.19282	-4.09193	4.27789e-05	0.00330122
Contig72947	#N/A	0.413166	-17.1461	4.19122	-4.09096	4.29592e-05	0.00331152
Contig104532	#N/A	0.168569	-17.1451	4.19018	-4.09174	4.2814e-05	0.00330213
Contig88789	#N/A	0.352262	-17.1409	4.19191	-4.08903	4.33177e-05	0.00333369
Contig76116	ref|XP_003705410.2| PREDICTED: uncharacterized protein LOC100879013 [Megachile rotundata]	0.657994	-17.1381	4.1811	-4.09894	4.15049e-05	0.00322758
Contig144560	ref|XP_011163378.1| PREDICTED: phosphatidylserine decarboxylase proenzyme [Solenopsis invicta]	0.687971	-17.1376	4.17967	-4.10024	4.12729e-05	0.00321308
Contig74381	ref|XP_012521463.1| PREDICTED: myrosinase 1 [Monomorium pharaonis]	0.219792	-17.137	4.19283	-4.08722	4.36582e-05	0.00335225
Contig82866	#N/A	0.219792	-17.137	4.19283	-4.08722	4.36582e-05	0.00335225
Contig115668	#N/A	0.471258	-17.1362	4.18587	-4.09382	4.24322e-05	0.00327984
Contig91141	ref|XP_011861558.1| PREDICTED: phenylalanine--tRNA ligase beta subunit, chloroplastic-like [Vollenhovia emeryi]	0.336882	-17.1347	4.19191	-4.08758	4.35904e-05	0.00335103
Contig54817	#N/A	0.232568	-17.1306	4.19235	-4.08615	4.38592e-05	0.00336072
Contig128836	ref|XP_012527700.1| PREDICTED: dystrophin, isoform E isoform X2 [Monomorium pharaonis]	1.71078	-17.13	4.19121	-4.08711	4.36775e-05	0.00335225
Contig86211	ref|XP_011873842.1| PREDICTED: transcription factor SPT20 homolog isoform X1 [Vollenhovia emeryi]	0.65883	-17.126	3.76349	-4.55057	5.35015e-06	0.000754898
Contig66608	#N/A	0.234443	-17.1231	4.18981	-4.08683	4.37301e-05	0.00335353
Contig32609	ref|XP_011158659.1| PREDICTED: mucosa-associated lymphoid tissue lymphoma translocation protein 1-like isoform X2 [Solenopsis invicta]	0.392327	-17.1192	4.18485	-4.09076	4.2996e-05	0.00331255
Contig15589	ref|XP_011862943.1| PREDICTED: CD59 glycoprotein-like [Vollenhovia emeryi]	42.4168	-17.1121	4.1981	-4.07616	4.57857e-05	0.00347097
Contig50492	#N/A	0.166198	-17.0958	4.19016	-4.07997	4.5041e-05	0.00342897
Contig26323	#N/A	0.249283	-17.089	4.18154	-4.08677	4.37416e-05	0.00335353
Contig33058	#N/A	0.211518	-17.0865	4.19283	-4.07518	4.59797e-05	0.00347981
Contig80741	ref|XP_014298245.1| PREDICTED: uncharacterized protein LOC103569414 isoform X2 [Microplitis demolitor]	0.847799	-17.0859	4.17327	-4.09413	4.23762e-05	0.00327898
Contig146041	#N/A	4.18366	-17.0826	2.5029	-6.82515	8.78319e-12	1.18194e-08
Contig40306	ref|XP_011860484.1| PREDICTED: lipoyl synthase, organellar chromatophore-like [Vollenhovia emeryi]	1.12336	-17.0819	4.1759	-4.09058	4.3029e-05	0.00331328
Contig35078	#N/A	0.223709	-17.0742	4.20596	-4.05953	4.91724e-05	0.00366644
Contig103420	#N/A	0.216637	-17.0741	4.19303	-4.07201	4.66084e-05	0.00351796
Contig47091	#N/A	0.65375	-17.0551	4.19149	-4.06898	4.72199e-05	0.00355652
Contig84729	ref|XP_011686746.1| PREDICTED: cell division cycle protein 123 homolog [Wasmannia auropunctata]	1.72314	-17.0497	4.17821	-4.08062	4.49156e-05	0.00342126
Contig79961	#N/A	0.194753	-17.048	4.19303	-4.0658	4.78682e-05	0.0035996
Contig88169	ref|XP_012535848.1| PREDICTED: replication factor C subunit 1 [Monomorium pharaonis]	0.194753	-17.048	4.19303	-4.0658	4.78682e-05	0.0035996
Contig48087	#N/A	1.44863	-17.0457	4.17537	-4.08243	4.45673e-05	0.00340391
Contig144939	#N/A	0.196424	-17.045	4.19269	-4.0654	4.79503e-05	0.00360002
Contig150225	ref|XP_011860387.1| PREDICTED: uncharacterized protein LOC105557685, partial [Vollenhovia emeryi]	0.196424	-17.045	4.19269	-4.0654	4.79503e-05	0.00360002
Contig88043	ref|XP_012942128.1| PREDICTED: probable beta-D-xylosidase 7 [Aplysia californica]	0.618083	-17.0377	4.19159	-4.06474	4.8085e-05	0.0036063
Contig83794	ref|XP_012527698.1| PREDICTED: probable cytochrome P450 6a20 [Monomorium pharaonis]	0.339799	-17.0341	4.19183	-4.06365	4.83123e-05	0.0036195
Contig47471	ref|XP_011068454.1| PREDICTED: xylosyltransferase oxt [Acromyrmex echinatior]	0.96893	-17.034	4.18089	-4.07426	4.61618e-05	0.00348985
Contig117290	ref|XP_011870716.1| PREDICTED: uncharacterized protein LOC105563606 [Vollenhovia emeryi]	1.30184	-17.0332	4.19291	-4.06237	4.85765e-05	0.0036366
Contig72914	#N/A	0.276916	-17.0238	4.19214	-4.06089	4.88861e-05	0.00365564
Contig34546	#N/A	0.225455	-17.022	4.19235	-4.06025	4.90212e-05	0.0036571
Contig51717	#N/A	0.225455	-17.022	4.19235	-4.06025	4.90212e-05	0.0036571
Contig55220	ref|XP_011883318.1| PREDICTED: DNA excision repair protein ERCC-6-like [Vollenhovia emeryi]	6.33793	-17.0215	4.17126	-4.08066	4.49087e-05	0.00342126
Contig36492	#N/A	0.31236	-17.0212	4.1918	-4.06059	4.89498e-05	0.00365564
Contig56058	#N/A	0.31236	-17.0212	4.1918	-4.06059	4.89498e-05	0.00365564
Contig75620	#N/A	0.228991	-17.0204	4.18985	-4.0623	4.85919e-05	0.0036366
Contig95053	#N/A	0.242799	-17.0182	4.19235	-4.05934	4.92111e-05	0.0036674
Contig58770	#N/A	1.11553	-17.0179	4.17842	-4.07279	4.64525e-05	0.00350807
Contig116155	#N/A	0.236363	-17.0134	4.19214	-4.05841	4.94085e-05	0.00368016
Contig91306	#N/A	0.347803	-17.0014	4.19159	-4.05607	4.9905e-05	0.00370738
Contig58502	#N/A	0.315339	-16.997	4.19166	-4.05496	5.01422e-05	0.00372304
Contig131907	#N/A	0.244198	-16.9942	4.19235	-4.05361	5.04329e-05	0.00374069
Contig149148	#N/A	0.244198	-16.9942	4.19235	-4.05361	5.04329e-05	0.00374069
Contig38100	#N/A	0.342793	-16.9841	4.19156	-4.05197	5.07886e-05	0.00375994
Contig32646	#N/A	0.365001	-16.9826	4.19136	-4.05181	5.0823e-05	0.00375994
Contig33940	ref|XP_004207545.1| PREDICTED: uncharacterized protein LOC101236413 [Hydra vulgaris]	0.251254	-16.9681	4.19214	-4.04761	5.17436e-05	0.00381986
Contig48721	#N/A	0.251254	-16.9681	4.19214	-4.04761	5.17436e-05	0.00381986
Contig51774	ref|XP_017067009.1| PREDICTED: siroheme synthase-like [Drosophila eugracilis]	0.251254	-16.9681	4.19214	-4.04761	5.17436e-05	0.00381986
Contig147341	#N/A	0.333404	-16.9626	4.19245	-4.04597	5.21061e-05	0.00384026
Contig118072	#N/A	0.310997	-16.9613	4.19166	-4.04644	5.20022e-05	0.00383695
Contig61746	ref|XP_011871685.1| PREDICTED: uncharacterized protein LOC105564130 [Vollenhovia emeryi]	1.47145	-16.9535	4.02144	-4.21578	2.48918e-05	0.00221813
Contig40397	ref|XP_392583.3| PREDICTED: uncharacterized protein LOC409057 isoform X2 [Apis mellifera]	0.170335	-16.9455	4.18835	-4.04587	5.21286e-05	0.00384026
Contig48976	#N/A	0.170335	-16.9455	4.18835	-4.04587	5.21286e-05	0.00384026
Contig101841	ref|XP_009030137.1| hypothetical protein HELRODRAFT_70460, partial [Helobdella robusta]	7.79306	-16.9433	4.19317	-4.04068	5.32966e-05	0.00391406
Contig95421	ref|XP_015050400.1| uncharacterized protein Dyak_GE21989, isoform B [Drosophila yakuba]	0.315152	-16.9399	4.19166	-4.04134	5.31474e-05	0.00390616
Contig47394	#N/A	0.353684	-16.9342	4.19156	-4.04006	5.34379e-05	0.0039224
Contig20914	ref|XP_015125965.1| PREDICTED: PTS system alpha-glucoside-specific EIICB component-like, partial [Diachasma alloeum]	0.764567	-16.9325	4.18661	-4.04445	5.24464e-05	0.00385965
Contig47777	#N/A	0.285371	-16.9176	4.1918	-4.03587	5.43999e-05	0.00397767
Contig65295	#N/A	0.451194	-16.9172	4.1858	-4.04158	5.30929e-05	0.00390519
Contig89105	#N/A	0.20439	-16.9131	4.19303	-4.03363	5.4921e-05	0.00400629
Contig37651	ref|XP_012151618.1| PREDICTED: putative adenosylhomocysteinase 3 isoform X6 [Megachile rotundata]	1.82021	-16.9107	2.67482	-6.32219	2.57878e-10	2.47873e-07
Contig69308	#N/A	0.507136	-16.8993	4.1924	-4.03093	5.55555e-05	0.00404839
Contig120713	ref|XP_013294803.1| hypothetical protein NECAME_18785 [Necator americanus]	0.389204	-16.8923	4.19143	-4.03019	5.57306e-05	0.00405906
Contig75543	#N/A	0.416108	-16.8922	4.18653	-4.03488	5.46293e-05	0.00399118
Contig116309	ref|XP_011867770.1| PREDICTED: general transcription factor IIH subunit 2 [Vollenhovia emeryi]	2.79684	-16.8854	3.1614	-5.34112	9.23762e-08	2.71927e-05
Contig34798	ref|XP_014790039.1| PREDICTED: polygalacturonase-like, partial [Octopus bimaculoides]	2.36294	-16.8738	4.19864	-4.01886	5.84804e-05	0.00422018
Contig53662	#N/A	0.202726	-16.8691	4.18724	-4.02868	5.60911e-05	0.0040811
Contig77901	#N/A	0.683314	-16.8648	4.18021	-4.03445	5.4731e-05	0.00399655
Contig69835	#N/A	0.174089	-16.8638	4.19261	-4.02226	5.76416e-05	0.00417885
Contig41519	ref|XP_011874752.1| PREDICTED: DDB1- and CUL4-associated factor 11 [Vollenhovia emeryi]	0.290192	-16.8561	4.192	-4.02102	5.79476e-05	0.00419029
Contig108235	#N/A	0.330647	-16.8452	4.18064	-4.02933	5.59369e-05	0.00407198
Contig87368	ref|XP_011882673.1| PREDICTED: protein maelstrom 2-like [Vollenhovia emeryi]	1.83521	-16.8365	4.1758	-4.03193	5.53214e-05	0.00403341
Contig36687	#N/A	0.296375	-16.833	4.20207	-4.00587	6.17886e-05	0.00442276
Contig131995	ref|XP_011862845.1| PREDICTED: dehydrogenase/reductase SDR family member 4-like [Vollenhovia emeryi]	0.156938	-16.8309	4.19506	-4.01207	6.01887e-05	0.00432578
Contig102153	#N/A	0.294076	-16.8219	4.18778	-4.0169	5.89692e-05	0.00425328
Contig77766	#N/A	0.25361	-16.8215	4.19235	-4.01242	6.00997e-05	0.00432158
Contig125600	#N/A	0.279657	-16.8095	4.1918	-4.0101	6.06942e-05	0.00435989
Contig60772	#N/A	0.666468	-16.8039	4.17881	-4.02121	5.78996e-05	0.00419029
Contig19452	#N/A	0.239841	-16.8021	4.19235	-4.0078	6.12872e-05	0.00439029
Contig63561	ref|XP_011866719.1| PREDICTED: mediator of RNA polymerase II transcription subunit 1 [Vollenhovia emeryi]	0.239841	-16.8021	4.19235	-4.0078	6.12872e-05	0.00439029
Contig71004	#N/A	0.734389	-16.799	4.19124	-4.00812	6.12038e-05	0.0043898
Contig113011	#N/A	0.441363	-16.7815	4.19128	-4.00392	6.23025e-05	0.00445053
Contig41338	#N/A	0.447183	-16.7652	4.1869	-4.0042	6.22274e-05	0.00444742
Contig86707	ref|XP_011635728.1| PREDICTED: protein spinster isoform X2 [Pogonomyrmex barbatus]	0.230388	-16.7614	4.19235	-3.99809	6.38553e-05	0.00455225
Contig4064	ref|XP_015114316.1| PREDICTED: DNA-directed RNA polymerases I, II, and III subunit RPABC4 [Diachasma alloeum]	0.389585	-16.7543	4.18049	-4.00774	6.13038e-05	0.00439029
Contig117456	#N/A	0.463309	-16.7511	4.18701	-4.00073	6.3148e-05	0.00450866
Contig32290	#N/A	0.289707	-16.7508	4.1918	-3.99609	6.43979e-05	0.00457938
Contig48939	#N/A	0.289707	-16.7508	4.1918	-3.99609	6.43979e-05	0.00457938
Contig97602	ref|XP_012248209.1| PREDICTED: ethylene receptor-like [Bombus impatiens]	0.289707	-16.7508	4.1918	-3.99609	6.43979e-05	0.00457938
Contig142315	#N/A	0.191986	-16.735	4.19269	-3.99147	6.56641e-05	0.00466238
Contig121935	#N/A	0.21151	-16.7318	4.19269	-3.9907	6.58799e-05	0.00467536
Contig60766	ref|XP_011163224.1| PREDICTED: homeobox protein OTX2-A-like isoform X2 [Solenopsis invicta]	0.122572	-16.7228	4.19773	-3.98377	6.78296e-05	0.00478967
Contig70961	ref|XP_012536311.1| PREDICTED: uncharacterized protein LOC105836666 isoform X1 [Monomorium pharaonis]	0.122572	-16.7228	4.19773	-3.98377	6.78296e-05	0.00478967
Contig97608	#N/A	0.379266	-16.7147	4.19183	-3.98745	6.67873e-05	0.00472788
Contig80957	ref|XP_011631790.1| PREDICTED: gamma-aminobutyric acid receptor subunit beta isoform X1 [Pogonomyrmex barbatus]	0.181678	-16.7118	4.19337	-3.98528	6.74004e-05	0.0047665
Contig63294	#N/A	0.23399	-16.6872	4.192	-3.98073	6.87047e-05	0.00483881
Contig144127	ref|XP_012530377.1| PREDICTED: zinc finger protein 85-like [Monomorium pharaonis]	0.360143	-16.6846	4.19132	-3.98075	6.8699e-05	0.00483881
Contig53638	#N/A	0.222148	-16.683	4.19303	-3.97874	6.92801e-05	0.00487018
Contig97737	#N/A	0.263522	-16.6726	4.20207	-3.96772	7.25641e-05	0.00506575
Contig69600	ref|XP_011871782.1| PREDICTED: uncharacterized protein LOC105564181, partial [Vollenhovia emeryi]	8.64201	-16.6682	4.10088	-4.06455	4.81256e-05	0.00360743
Contig99517	ref|XP_011879875.1| PREDICTED: uncharacterized protein C11orf70 homolog [Vollenhovia emeryi]	2.42129	-16.668	3.2919	-5.06335	4.12e-07	9.19557e-05
Contig129894	ref|XP_011874311.1| PREDICTED: biogenesis of lysosome-related organelles complex 1 subunit 6-like [Vollenhovia emeryi]	0.171709	-16.6606	4.19337	-3.97309	7.09466e-05	0.00497249
Contig83787	#N/A	0.171709	-16.6606	4.19337	-3.97309	7.09466e-05	0.00497249
Contig124646	#N/A	0.266394	-16.6552	4.19259	-3.97254	7.11108e-05	0.00498153
Contig71556	#N/A	0.197095	-16.6548	4.19303	-3.97202	7.12672e-05	0.00498754
Contig62529	ref|XP_012248351.1| PREDICTED: probable tRNA N6-adenosine threonylcarbamoyltransferase, mitochondrial [Bombus impatiens]	1.60624	-16.6499	4.17429	-3.98866	6.64465e-05	0.00470847
Contig42929	#N/A	0.193367	-16.6489	4.19303	-3.97061	7.16901e-05	0.00500969
Contig78223	#N/A	0.406435	-16.6453	4.18408	-3.97825	6.94243e-05	0.0048779
Contig46132	#N/A	0.492787	-16.6426	4.18391	-3.97778	6.95629e-05	0.00488521
Contig51290	ref|XP_011066101.1| PREDICTED: chymotrypsin-like elastase family member 2A [Acromyrmex echinatior]	0.235697	-16.6422	4.19235	-3.96967	7.1972e-05	0.0050269
Contig68198	ref|XP_011871954.1| PREDICTED: probable 2-oxoglutarate dehydrogenase E1 component DHKTD1 homolog, mitochondrial [Vollenhovia emeryi]	1.68048	-16.6399	4.18386	-3.97716	6.97447e-05	0.00489554
Contig52512	#N/A	0.168946	-16.6345	4.19337	-3.96686	7.28268e-05	0.0050711
Contig61812	#N/A	0.168946	-16.6345	4.19337	-3.96686	7.28268e-05	0.0050711
Contig84422	#N/A	0.168946	-16.6345	4.19337	-3.96686	7.28268e-05	0.0050711
Contig96732	ref|XP_011868073.1| PREDICTED: dehydrogenase/reductase SDR family member on chromosome X-like [Vollenhovia emeryi]	1.24426	-16.6333	4.19479	-3.96523	7.33258e-05	0.00509762
Contig51179	#N/A	0.190011	-16.6327	4.19303	-3.96676	7.2856e-05	0.0050711
Contig54044	#N/A	0.190011	-16.6327	4.19303	-3.96676	7.2856e-05	0.0050711
Contig89877	#N/A	0.190011	-16.6327	4.19303	-3.96676	7.2856e-05	0.0050711
Contig94346	#N/A	0.181737	-16.6209	4.19303	-3.96395	7.37206e-05	0.00511868
Contig45594	ref|XP_011695054.1| PREDICTED: dedicator of cytokinesis protein 7 [Wasmannia auropunctata]	0.588273	-16.6191	4.19127	-3.96516	7.33452e-05	0.00509762
Contig51312	#N/A	0.16487	-16.6139	4.1902	-3.96493	7.34166e-05	0.00510007
Contig22741	ref|XP_011703814.1| PREDICTED: uncharacterized protein LOC105459462 [Wasmannia auropunctata]	0.318233	-16.6107	4.1877	-3.96655	7.2921e-05	0.00507312
Contig130519	#N/A	0.373292	-16.596	4.17924	-3.97105	7.15551e-05	0.00500521
Contig39640	#N/A	0.163765	-16.5782	4.19337	-3.95342	7.70422e-05	0.00532836
Contig59784	#N/A	0.378137	-16.575	4.19252	-3.95347	7.70258e-05	0.00532836
Contig141971	ref|XP_015765263.1| PREDICTED: omega-6 fatty acid desaturase, endoplasmic reticulum isozyme 1-like [Acropora digitifera]	0.241649	-16.5675	4.19214	-3.95205	7.7486e-05	0.00535643
Contig54765	#N/A	0.110043	-16.5639	4.19928	-3.94447	7.99773e-05	0.00550441
Contig76674	#N/A	0.110043	-16.5639	4.19928	-3.94447	7.99773e-05	0.00550441
Contig83572	ref|XP_011639943.1| PREDICTED: serine/threonine-protein phosphatase 4 regulatory subunit 1-like isoform X2 [Pogonomyrmex barbatus]	0.110043	-16.5639	4.19928	-3.94447	7.99773e-05	0.00550441
Contig88668	#N/A	0.110043	-16.5639	4.19928	-3.94447	7.99773e-05	0.00550441
Contig92022	ref|XP_011689403.1| PREDICTED: ecto-NOX disulfide-thiol exchanger 2 [Wasmannia auropunctata]	5.15643	-16.5556	4.18145	-3.95931	7.51673e-05	0.00520889
Contig57799	ref|XP_011068076.1| PREDICTED: centromere protein L-like isoform X1 [Acromyrmex echinatior]	0.166286	-16.5503	4.19681	-3.94355	8.02848e-05	0.00551789
Contig80041	#N/A	0.166286	-16.5503	4.19681	-3.94355	8.02848e-05	0.00551789
Contig119374	#N/A	0.304861	-16.5233	4.19077	-3.94279	8.05407e-05	0.00552896
Contig50951	ref|XP_011689253.1| PREDICTED: histone-lysine N-methyltransferase ash1 [Wasmannia auropunctata]	1.38153	-16.5231	4.18373	-3.94937	7.83563e-05	0.00540865
Contig77564	#N/A	0.362153	-16.5203	4.18946	-3.9433	8.03696e-05	0.00552065
Contig123036	ref|XP_011880646.1| PREDICTED: CAS1 domain-containing protein 1 [Vollenhovia emeryi]	3.78687	-16.5197	3.81376	-4.33161	1.4802e-05	0.001555
Contig136707	#N/A	0.301238	-16.4997	4.18871	-3.93909	8.17923e-05	0.00560748
Contig135660	ref|XP_011861392.1| PREDICTED: uncharacterized protein LOC105558377, partial [Vollenhovia emeryi]	0.721549	-16.4977	4.19261	-3.93495	8.32131e-05	0.00568832
Contig64161	#N/A	0.239834	-16.4975	4.19282	-3.93471	8.32973e-05	0.00569132
Contig70467	ref|XP_011706302.1| PREDICTED: LOW QUALITY PROTEIN: uncharacterized protein LOC105461502 [Wasmannia auropunctata]	0.174565	-16.4975	4.19337	-3.93419	8.34771e-05	0.0056981
Contig82052	ref|XP_011504129.1| PREDICTED: proline synthase co-transcribed bacterial homolog protein-like [Ceratosolen solmsi marchali]	0.174565	-16.4975	4.19337	-3.93419	8.34771e-05	0.0056981
Contig70585	#N/A	0.252421	-16.4932	4.18819	-3.93803	8.21542e-05	0.0056241
Contig57643	#N/A	0.146783	-16.4912	4.19505	-3.93112	8.45509e-05	0.00576582
Contig70413	#N/A	0.15043	-16.4773	4.19505	-3.9278	8.57252e-05	0.00584027
Contig136997	ref|XP_012055692.1| PREDICTED: potassium voltage-gated channel protein eag isoform X1 [Atta cephalotes]	1.95895	-16.4628	2.72153	-6.04911	1.45652e-09	1.00533e-06
Contig62813	ref|XP_015930380.1| PREDICTED: lysosomal protective protein-like [Parasteatoda tepidariorum]	3.84769	-16.4511	3.14683	-5.22783	1.7151e-07	4.43843e-05
Contig41410	#N/A	0.234532	-16.4502	4.19235	-3.92386	8.71429e-05	0.00592542
Contig64939	#N/A	0.24323	-16.45	4.19554	-3.92083	8.82447e-05	0.00599457
Contig92276	ref|XP_003494250.1| PREDICTED: bifunctional aspartokinase/homoserine dehydrogenase 1, chloroplastic-like [Bombus impatiens]	0.79798	-16.4466	4.19562	-3.91994	8.85706e-05	0.00601093
Contig38429	ref|XP_012540119.1| PREDICTED: nucleosome-remodeling factor subunit NURF301, partial [Monomorium pharaonis]	2.95124	-16.4408	4.19334	-3.92068	8.82978e-05	0.0059953
Contig70171	ref|XP_011170193.1| PREDICTED: uncharacterized protein K02A2.6-like [Solenopsis invicta]	0.584246	-16.4379	4.18302	-3.92968	8.50602e-05	0.00579775
Contig128199	#N/A	0.449879	-16.3997	4.18493	-3.91875	8.90104e-05	0.00603498
Contig148664	#N/A	0.1845	-16.3983	4.19303	-3.91084	9.19774e-05	0.00621527
Contig26458	#N/A	0.878093	-16.3917	4.19305	-3.90925	9.25832e-05	0.00624426
Contig44000	ref|XP_012349676.1| PREDICTED: LOW QUALITY PROTEIN: putative leucine--tRNA ligase, mitochondrial, partial [Apis florea]	1.16373	-16.3727	3.05462	-5.35996	8.32398e-08	2.52936e-05
Contig40487	#N/A	0.496942	-16.3724	4.191	-3.90656	9.36199e-05	0.00630437
Contig139659	#N/A	0.369524	-16.3644	4.19751	-3.89858	9.67566e-05	0.00648549
Contig47393	#N/A	1.08083	-16.36	4.18736	-3.90701	9.34462e-05	0.00629946
Contig127398	#N/A	0.472123	-16.3414	4.19426	-3.89614	9.7736e-05	0.00654183
Contig97892	#N/A	0.943981	-16.3322	4.20203	-3.88674	0.000101599	0.00674606
Contig62263	ref|XP_003493074.1| PREDICTED: acetolactate synthase large subunit-like [Bombus impatiens]	0.370848	-16.3213	4.19274	-3.89276	9.91119e-05	0.00662138
Contig48846	#N/A	0.217137	-16.3177	4.19282	-3.89182	9.94946e-05	0.00664066
Contig19916	ref|XP_017022416.1| PREDICTED: ribose operon repressor-like [Drosophila kikkawai]	0.72273	-16.3161	4.19826	-3.8864	0.000101742	0.00675235
Contig132813	#N/A	0.245503	-16.3073	4.19111	-3.89093	9.98589e-05	0.00665006
Contig66327	ref|XP_017128922.1| PREDICTED: cobalamin biosynthesis protein CobD-like [Drosophila elegans]	1.09653	-16.2997	4.1839	-3.89582	9.78662e-05	0.00654702
Contig105540	#N/A	0.25215	-16.2891	4.2007	-3.87771	0.000105442	0.006962
Contig64299	#N/A	0.505365	-16.2886	4.18512	-3.89202	9.94118e-05	0.00663827
Contig94622	#N/A	0.55366	-16.286	4.18288	-3.89348	9.88146e-05	0.00660464
Contig41462	#N/A	0.797047	-16.2835	4.1986	-3.87831	0.000105184	0.00695472
Contig92387	#N/A	0.394201	-16.2826	4.19444	-3.88195	0.000103623	0.00685792
Contig42202	#N/A	6.62488	-16.2743	4.19093	-3.88321	0.000103085	0.0068255
Contig89349	ref|XP_011068010.1| PREDICTED: cytosolic carboxypeptidase 1-like isoform X4 [Acromyrmex echinatior]	0.960641	-16.2743	4.18944	-3.88459	0.000102505	0.00679343
Contig47604	ref|XP_011876983.1| PREDICTED: baculoviral IAP repeat-containing protein 7-B-like [Vollenhovia emeryi]	0.674567	-16.2667	4.18335	-3.88844	0.000100889	0.00670521
Contig70533	ref|XP_009059992.1| hypothetical protein LOTGIDRAFT_154010 [Lottia gigantea]	1.43214	-16.2555	4.19362	-3.87623	0.000106088	0.00700134
Contig147918	ref|XP_005089741.1| PREDICTED: acyl-CoA-binding protein [Aplysia californica]	0.510302	-16.2502	4.18435	-3.88356	0.000102937	0.0068189
Contig53653	#N/A	0.204758	-16.2373	4.19612	-3.8696	0.000109016	0.00717447
Contig79373	#N/A	0.204758	-16.2373	4.19612	-3.8696	0.000109016	0.00717447
Contig85174	#N/A	0.369961	-16.2133	4.19303	-3.86673	0.000110306	0.00724591
Contig79099	ref|XP_011563249.1| PREDICTED: 6-phosphogluconolactonase [Plutella xylostella]	0.644767	-16.2124	4.18277	-3.87601	0.000106185	0.00700449
Contig86926	#N/A	0.483107	-16.1973	4.17953	-3.87539	0.000106456	0.00701911
Contig117645	ref|XP_011706357.1| PREDICTED: uncharacterized protein LOC105461553 isoform X2 [Wasmannia auropunctata]	24.0365	-16.1941	4.18623	-3.86842	0.000109545	0.00720258
Contig145599	ref|XP_012059832.1| PREDICTED: protein smoothened [Atta cephalotes]	4.75403	-16.1883	4.19837	-3.85586	0.000115324	0.00753695
Contig45274	ref|XP_014680357.1| PREDICTED: LOW QUALITY PROTEIN: NADH-quinone oxidoreductase subunit F-like, partial [Priapulus caudatus]	0.276059	-16.1867	4.19381	-3.85965	0.000113548	0.00743465
Contig88678	ref|XP_013171214.1| PREDICTED: UPF0073 membrane protein Mb1114c-like [Papilio xuthus]	0.598939	-16.1334	4.18545	-3.85464	0.000115898	0.00757099
Contig83036	ref|XP_011637194.1| PREDICTED: intraflagellar transport protein 88 homolog [Pogonomyrmex barbatus]	0.543171	-16.1275	4.18454	-3.85407	0.00011617	0.00758172
Contig97462	ref|XP_011858072.1| PREDICTED: uncharacterized protein LOC105555657 [Vollenhovia emeryi]	0.557011	-16.1068	4.18223	-3.85126	0.000117512	0.0076658
Contig96919	ref|XP_015584961.1| PREDICTED: metastasis-associated protein MTA3 isoform X3 [Cephus cinctus]	0.496589	-16.0991	4.18365	-3.84809	0.000119041	0.00776195
Contig40791	ref|XP_001946617.2| PREDICTED: alpha-tocopherol transfer protein [Acyrthosiphon pisum]	11.602	-16.098	4.19807	-3.83462	0.000125758	0.00815476
Contig129824	#N/A	0.440289	-16.0972	4.18686	-3.8447	0.000120699	0.00786086
Contig72550	ref|XP_011866071.1| PREDICTED: uncharacterized protein LOC105561039 [Vollenhovia emeryi]	0.663657	-16.0934	4.18828	-3.8425	0.00012179	0.00791561
Contig92820	ref|XP_012536579.1| PREDICTED: 30S ribosomal protein S12, chloroplastic-like [Monomorium pharaonis]	0.191451	-16.0862	4.20596	-3.82463	0.000130969	0.00843847
Contig116241	#N/A	0.370611	-16.0819	4.19462	-3.83393	0.000126112	0.00817396
Contig32036	#N/A	0.25474	-16.0524	4.2007	-3.82136	0.000132715	0.00853539
Contig41001	ref|XP_013175214.1| PREDICTED: protein turtle-like [Papilio xuthus]	1.46635	-16.049	4.19297	-3.8276	0.000129397	0.00836768
Contig10978	#N/A	0.509437	-16.0423	4.19883	-3.82066	0.000133096	0.008556
Contig65430	ref|XP_012349669.1| PREDICTED: cyanelle 30S ribosomal protein S4-like, partial [Apis florea]	0.691021	-16.03	4.1845	-3.83079	0.00012773	0.00826858
Contig105688	ref|XP_011169522.1| PREDICTED: putative nuclease HARBI1 [Solenopsis invicta]	0.815095	-16.0255	4.18754	-3.82695	0.000129742	0.00838232
Contig111213	ref|XP_011864963.1| PREDICTED: probable ATP-dependent RNA helicase Dbp73D [Vollenhovia emeryi]	0.449936	-16.0188	4.18538	-3.82733	0.00012954	0.0083731
Contig93566	ref|XP_011630787.1| PREDICTED: thiamine transporter 2-like [Pogonomyrmex barbatus]	0.549365	-16.0107	4.18828	-3.82275	0.00013197	0.00849906
Contig143296	#N/A	0.634418	-15.9929	4.17922	-3.82678	0.000129833	0.00838438
Contig54314	#N/A	0.877546	-15.9877	4.19161	-3.81421	0.000136618	0.00875851
Contig142838	ref|XP_012538806.1| PREDICTED: probable multidrug resistance-associated protein lethal(2)03659 [Monomorium pharaonis]	4.20344	-15.9781	3.0552	-5.22981	1.69688e-07	4.40744e-05
Contig88036	#N/A	0.690264	-15.9698	4.18559	-3.81543	0.000135945	0.00872328
Contig17651	ref|XP_008188257.1| PREDICTED: uncharacterized protein LOC100160950 [Acyrthosiphon pisum]	0.333545	-15.9569	4.18739	-3.8107	0.000138575	0.00886783
Contig106000	#N/A	0.229977	-15.9261	4.19545	-3.79603	0.000147032	0.00935908
Contig104545	#N/A	4.59424	-15.9218	4.19082	-3.7992	0.000145162	0.00925587
Contig78921	ref|XP_011161160.1| PREDICTED: solute carrier family 28 member 3 isoform X1 [Solenopsis invicta]	3.7923	-15.92	3.66917	-4.33884	1.43235e-05	0.00151601
Contig75876	#N/A	0.409983	-15.9144	4.19103	-3.79726	0.000146302	0.00932015
Contig106341	#N/A	0.45495	-15.8971	4.19632	-3.78834	0.000151659	0.00961374
Contig35588	ref|XP_011874360.1| PREDICTED: uncharacterized protein CG5098 isoform X1 [Vollenhovia emeryi]	5.46339	-15.897	4.19874	-3.78613	0.000153009	0.00966893
Contig23017	#N/A	0.88031	-15.8918	4.19695	-3.7865	0.000152784	0.00966336
Contig75048	#N/A	0.899669	-15.8842	4.19392	-3.78743	0.000152212	0.00964013
Contig75945	#N/A	0.364794	-15.8689	4.19122	-3.78621	0.000152961	0.00966893
Contig49557	#N/A	0.228587	-15.8688	4.20031	-3.77802	0.000158081	0.00993611
Contig29711	ref|XP_012530428.1| PREDICTED: THAP domain-containing protein 2-like [Monomorium pharaonis]	1.21072	-15.8654	4.18471	-3.79127	0.000149881	0.00951807
Contig78757	#N/A	0.288799	-15.8625	4.19322	-3.78288	0.000155022	0.00977863
Contig83618	#N/A	10.9749	-15.8551	4.19218	-3.78206	0.000155534	0.00980221
Contig62185	ref|XP_017118381.1| PREDICTED: ribosome-associated ATPase-like [Drosophila elegans]	0.289329	-15.8546	4.19195	-3.78214	0.000155485	0.00980221
Contig114606	ref|XP_011696169.1| PREDICTED: leukotriene A-4 hydrolase [Wasmannia auropunctata]	0.583353	-15.8507	4.18116	-3.79099	0.000150049	0.00952446
Contig119909	ref|XP_011170369.1| PREDICTED: uncharacterized protein LOC105203292 [Solenopsis invicta]	1.38087	-15.8396	4.1924	-3.77816	0.00015799	0.00993478
Contig5698	ref|XP_012546702.1| PREDICTED: cytochrome P450 9e2-like [Bombyx mori]	0.3515	-15.8387	4.1884	-3.78156	0.00015585	0.00981774
Contig120740	#N/A	0.203541	-15.8361	4.19493	-3.77506	0.000159971	0.010046
Contig150170	#N/A	0.203541	-15.8361	4.19493	-3.77506	0.000159971	0.010046
Contig81145	#N/A	2.35884	-15.8347	2.26797	-6.98191	2.91191e-12	5.06911e-09
Contig52298	#N/A	0.29696	-15.831	4.1871	-3.78089	0.000156266	0.00983955
Contig123826	ref|XP_011860138.1| PREDICTED: cationic amino acid transporter 2 isoform X1 [Vollenhovia emeryi]	3.68146	-15.815	3.88487	-4.07092	4.68272e-05	0.00353259
Contig55457	#N/A	0.88384	-15.8134	4.18456	-3.77898	0.000157473	0.00991113
Contig100016	#N/A	0.481683	-15.813	4.19078	-3.77327	0.00016112	0.0101136
Contig61456	ref|XP_012533188.1| PREDICTED: nephrin isoform X3 [Monomorium pharaonis]	2.18485	-15.8102	4.08689	-3.86851	0.000109503	0.00720258
Contig86695	ref|XP_017091895.1| PREDICTED: transcription termination/antitermination protein NusA-like [Drosophila bipectinata]	1.0854	-15.8035	4.19247	-3.76949	0.000163584	0.010241
Contig75600	ref|XP_011880898.1| PREDICTED: uncharacterized protein LOC105569228, partial [Vollenhovia emeryi]	0.516647	-15.7997	4.19176	-3.76923	0.000163754	0.0102471
Contig101582	ref|XP_011865163.1| PREDICTED: putative protein MSS51 homolog, mitochondrial [Vollenhovia emeryi]	0.613763	-15.7965	4.18727	-3.77252	0.000161609	0.0101398
Contig81761	#N/A	0.427705	-15.7956	4.19166	-3.76834	0.000164337	0.0102745
Contig97620	#N/A	1.83948	-15.7914	4.19031	-3.76854	0.000164205	0.0102708
Contig98165	#N/A	0.455407	-15.7783	4.19195	-3.76396	0.000167246	0.0104379
Contig37964	#N/A	0.479048	-15.7742	4.18374	-3.77036	0.000163015	0.010219
Contig47422	ref|XP_011049539.1| PREDICTED: protein wntless [Acromyrmex echinatior]	0.733497	-15.772	4.19827	-3.75677	0.000172119	0.0106901
Contig95407	#N/A	0.473771	-15.764	4.19947	-3.75382	0.000174163	0.0108027
Contig100756	#N/A	0.879697	-15.7593	4.18014	-3.77004	0.000163223	0.0102229
Contig13300	ref|XP_014238399.1| PREDICTED: 60S ribosomal protein L11-like [Trichogramma pretiosum]	0.985184	-15.7518	4.18833	-3.76089	0.00016931	0.0105481
Contig29224	ref|XP_012527508.1| PREDICTED: inactive peptidyl-prolyl cis-trans isomerase FKBP6-like [Monomorium pharaonis]	0.641144	-15.7387	4.19559	-3.75125	0.000175955	0.0108852
Contig129306	#N/A	0.267274	-15.7359	4.20411	-3.74297	0.000181856	0.0111964
Contig84482	ref|XP_011059082.1| PREDICTED: uncharacterized protein LOC105148835 [Acromyrmex echinatior]	0.804728	-15.7231	4.19398	-3.74896	0.000177566	0.0109753
Contig35645	#N/A	0.544419	-15.7107	3.94678	-3.98064	6.87311e-05	0.00483881
Contig17965	ref|XP_011703661.1| PREDICTED: folliculin isoform X1 [Wasmannia auropunctata]	1.51615	-15.6998	4.19095	-3.74613	0.000179584	0.0110903
Contig32879	#N/A	1.65335	-15.6927	4.19869	-3.73751	0.00018585	0.0114125
Contig5677	ref|XP_015786741.1| PREDICTED: ATP-binding cassette sub-family A member 1-like [Tetranychus urticae]	0.792057	-15.6851	4.18788	-3.74536	0.000180133	0.0111097
Contig39697	ref|XP_011693815.1| PREDICTED: WD repeat-containing protein mio-B [Wasmannia auropunctata]	2.1641	-15.6602	4.18626	-3.74087	0.000183387	0.0112808
Contig24863	#N/A	0.842654	-15.6586	4.18751	-3.73935	0.000184499	0.0113443
Contig141550	#N/A	0.514659	-15.652	4.20027	-3.72643	0.000194214	0.0118591
Contig35867	ref|XP_011858733.1| PREDICTED: uncharacterized protein LOC105556257, partial [Vollenhovia emeryi]	0.368892	-15.644	4.18543	-3.73772	0.000185697	0.0114095
Contig82258	ref|XP_011882433.1| PREDICTED: uncharacterized protein LOC105570082, partial [Vollenhovia emeryi]	0.302172	-15.6379	4.18709	-3.73479	0.00018787	0.0115115
Contig64284	#N/A	0.264508	-15.6365	4.18834	-3.73335	0.000188952	0.0115678
Contig83602	ref|XP_012532235.1| PREDICTED: NF-kappa-B-repressing factor [Monomorium pharaonis]	1.88351	-15.6267	3.37503	-4.63009	3.65515e-06	0.000565676
Contig86369	ref|XP_016842819.1| PREDICTED: uncharacterized protein LOC107981417 [Nasonia vitripennis]	0.62359	-15.6248	4.19843	-3.72157	0.000197986	0.0120566
Contig27241	#N/A	0.573201	-15.6228	4.19875	-3.72083	0.000198568	0.0120727
Contig68673	ref|XP_011883372.1| PREDICTED: protein tramtrack, alpha isoform isoform X1 [Vollenhovia emeryi]	0.376374	-15.6211	4.19172	-3.72667	0.00019403	0.0118529
Contig20767	#N/A	0.912706	-15.6198	4.18658	-3.73091	0.000190789	0.0116701
Contig65703	ref|XP_003731900.2| PREDICTED: histidine ammonia-lyase, partial [Strongylocentrotus purpuratus]	0.961676	-15.6141	4.17795	-3.73725	0.000186043	0.0114193
Contig46604	#N/A	0.446039	-15.6107	4.18662	-3.72872	0.000192459	0.011762
Contig32962	#N/A	0.420739	-15.6045	4.18147	-3.73182	0.0001901	0.011633
Contig65091	#N/A	0.262246	-15.6041	4.19121	-3.72306	0.000196825	0.0119978
Contig97000	#N/A	0.236622	-15.6023	4.20391	-3.71137	0.000206138	0.0124793
Contig94258	ref|XP_011861565.1| PREDICTED: uncharacterized protein LOC105558474 [Vollenhovia emeryi]	0.795518	-15.5993	4.18722	-3.72545	0.000194968	0.0119
Contig146379	#N/A	6.79455	-15.5943	4.19613	-3.71634	0.000202129	0.012261
Contig37807	#N/A	0.194818	-15.593	4.19587	-3.71627	0.000202186	0.012261
Contig67727	#N/A	0.194818	-15.593	4.19587	-3.71627	0.000202186	0.012261
Contig112740	ref|XP_013402251.1| PREDICTED: prostaglandin reductase 1-like [Lingula anatina]	0.441575	-15.582	4.19224	-3.71688	0.000201702	0.0122527
Contig95678	#N/A	0.456704	-15.5732	4.18474	-3.72143	0.000198094	0.0120566
Contig46078	ref|XP_011861118.1| PREDICTED: uncharacterized protein LOC105558172 [Vollenhovia emeryi]	0.285801	-15.5644	4.19221	-3.7127	0.000205058	0.0124245
Contig131537	#N/A	0.207165	-15.5601	4.19468	-3.70948	0.000207687	0.0125598
Contig77811	#N/A	2.11792	-15.5571	3.95041	-3.93809	8.21328e-05	0.0056241
Contig69321	ref|XP_017064538.1| PREDICTED: K(+)/H(+) antiporter NhaP2-like [Drosophila eugracilis]	0.397413	-15.5561	4.18802	-3.71443	0.000203666	0.0123455
Contig84938	#N/A	0.535983	-15.5514	4.19454	-3.70753	0.000209293	0.012627
Contig18031	#N/A	0.383248	-15.5294	4.19483	-3.70202	0.000213889	0.0128768
Contig33050	#N/A	0.151444	-15.5181	4.19658	-3.69779	0.000217481	0.0130653
Contig33857	#N/A	0.151444	-15.5181	4.19658	-3.69779	0.000217481	0.0130653
Contig60920	#N/A	0.151444	-15.5181	4.19658	-3.69779	0.000217481	0.0130653
Contig62527	#N/A	0.813298	-15.5115	4.19901	-3.69408	0.000220682	0.0132342
Contig131329	#N/A	0.150025	-15.5095	4.19729	-3.69513	0.000219772	0.013186
Contig78950	ref|XP_012060794.1| PREDICTED: ATP-binding cassette sub-family B member 7, mitochondrial [Atta cephalotes]	1.09098	-15.5014	4.18003	-3.70845	0.000208532	0.0125972
Contig78579	#N/A	0.641321	-15.5005	4.20203	-3.6888	0.000225311	0.0134446
Contig115108	#N/A	0.185184	-15.4973	4.19576	-3.69356	0.000221137	0.0132342
Contig129323	#N/A	0.185184	-15.4973	4.19576	-3.69356	0.000221137	0.0132342
Contig130690	#N/A	0.185184	-15.4973	4.19576	-3.69356	0.000221137	0.0132342
Contig39971	ref|XP_011696238.1| PREDICTED: nuclear transcription factor Y subunit alpha [Wasmannia auropunctata]	0.185184	-15.4973	4.19576	-3.69356	0.000221137	0.0132342
Contig79752	#N/A	2.23247	-15.4914	4.19228	-3.69521	0.000219707	0.013186
Contig120499	ref|XP_011871062.1| PREDICTED: RB1-inducible coiled-coil protein 1 isoform X3 [Vollenhovia emeryi]	0.364072	-15.4904	4.18633	-3.70023	0.000215407	0.0129627
Contig108654	ref|XP_011067718.1| PREDICTED: neutral ceramidase isoform X1 [Acromyrmex echinatior]	1.57687	-15.4866	4.17903	-3.70578	0.000210739	0.012698
Contig90782	ref|XP_011861809.1| PREDICTED: enolase-like [Vollenhovia emeryi]	0.226998	-15.4795	4.19637	-3.68879	0.000225319	0.0134446
Contig96163	#N/A	0.605268	-15.4638	4.19282	-3.68815	0.000225892	0.0134618
Contig129994	ref|XP_006622629.1| PREDICTED: 40S ribosomal protein S4-like [Apis dorsata]	0.54883	-15.4523	4.00314	-3.86006	0.000113361	0.00742587
Contig126049	#N/A	0.332044	-15.4429	4.18701	-3.6883	0.00022576	0.0134596
Contig128038	#N/A	0.283735	-15.4418	4.18909	-3.68619	0.000227638	0.0135544
Contig47108	ref|XP_017117958.1| PREDICTED: UPF0053 protein sll0260-like [Drosophila elegans]	0.508225	-15.4387	4.18521	-3.68886	0.000225258	0.0134446
Contig46100	#N/A	0.487034	-15.4361	4.19192	-3.68234	0.0002311	0.0137548
Contig58548	#N/A	0.290448	-15.4223	4.18971	-3.68101	0.000232315	0.0138212
Contig31603	#N/A	0.635594	-15.4178	4.19122	-3.67861	0.000234513	0.0139402
Contig117397	ref|XP_012522724.1| PREDICTED: cytochrome P450 4c3-like, partial [Monomorium pharaonis]	0.196758	-15.4157	4.19518	-3.67464	0.000238189	0.014135
Contig85342	#N/A	0.306504	-15.4007	4.19289	-3.67306	0.000239659	0.0142043
Contig70483	ref|XP_012248206.1| PREDICTED: LOW QUALITY PROTEIN: uncharacterized protein LOC100740922 [Bombus impatiens]	0.876879	-15.3938	4.18555	-3.67783	0.000235223	0.0139766
Contig37190	#N/A	1.0279	-15.3854	4.19243	-3.66979	0.000242746	0.0143572
Contig112540	#N/A	0.678518	-15.3843	3.77316	-4.07729	4.55627e-05	0.0034624
Contig80029	ref|XP_003493008.1| PREDICTED: putative GTPase Obg [Bombus impatiens]	0.540117	-15.3701	4.19173	-3.66677	0.000245631	0.0145035
Contig45323	#N/A	0.337594	-15.3607	4.19455	-3.66208	0.00025018	0.0147388
Contig145098	#N/A	0.151292	-15.357	4.19707	-3.65897	0.000253232	0.0148901
Contig145772	#N/A	0.151292	-15.357	4.19707	-3.65897	0.000253232	0.0148901
Contig99376	ref|XP_011879313.1| PREDICTED: peroxisome assembly factor 2 [Vollenhovia emeryi]	5.32127	-15.3506	2.68265	-5.72217	1.05175e-08	4.87241e-06
Contig24166	ref|XP_011646195.1| PREDICTED: retinoid-inducible serine carboxypeptidase-like isoform X1 [Pogonomyrmex barbatus]	46.7745	-15.3478	4.20596	-3.64905	0.000263207	0.0153616
Contig99180	#N/A	0.492962	-15.3401	4.19243	-3.659	0.000253206	0.0148901
Contig78257	ref|XP_011167467.1| PREDICTED: TBC1 domain family member 4 isoform X1 [Solenopsis invicta]	0.622041	-15.3397	4.19797	-3.65408	0.000258104	0.0151388
Contig96279	#N/A	0.920315	-15.3355	4.1841	-3.66519	0.000247156	0.0145753
Contig75948	ref|XP_012799636.1| ATP-binding cassette sub-family F member 2 [Schistosoma haematobium]	0.454854	-15.3241	4.1883	-3.65878	0.000253422	0.0148951
Contig60723	#N/A	0.317361	-15.3198	4.20068	-3.64699	0.000265327	0.0154718
Contig56275	#N/A	0.881284	-15.3018	4.19108	-3.65104	0.000261182	0.0152813
Contig128401	#N/A	0.343533	-15.2992	4.18658	-3.65434	0.00025784	0.0151296
Contig45596	ref|XP_012527438.1| PREDICTED: uncharacterized protein LOC105831678 [Monomorium pharaonis]	14.3005	-15.2818	2.7576	-5.5417	3e-08	1.11091e-05
Contig79369	#N/A	0.598763	-15.2791	4.18436	-3.65149	0.000260728	0.0152674
Contig95805	#N/A	0.245477	-15.2759	4.19375	-3.64254	0.000269959	0.0157013
Contig93300	#N/A	0.818081	-15.2753	4.18857	-3.6469	0.000265424	0.0154718
Contig141136	ref|XP_011696169.1| PREDICTED: leukotriene A-4 hydrolase [Wasmannia auropunctata]	0.577852	-15.2714	4.18103	-3.65254	0.000259656	0.0152109
Contig90389	#N/A	0.253477	-15.2663	4.1938	-3.6402	0.000272431	0.0158215
Contig127817	ref|XP_011166822.1| PREDICTED: torso-like protein [Solenopsis invicta]	0.190163	-15.2584	4.19806	-3.63463	0.000278384	0.0161274
Contig126210	#N/A	0.308512	-15.2555	4.19332	-3.63804	0.000274716	0.0159346
Contig40277	#N/A	0.186986	-15.2541	4.1958	-3.63556	0.000277381	0.0160759
Contig46194	#N/A	0.186986	-15.2541	4.1958	-3.63556	0.000277381	0.0160759
Contig136507	ref|XP_012534315.1| PREDICTED: uncharacterized protein LOC105835508 isoform X1 [Monomorium pharaonis]	1.86292	-15.2437	4.19758	-3.63154	0.000281738	0.0162786
Contig55640	ref|XP_001651061.1| AAEL015233-PA [Aedes aegypti]	0.307074	-15.2378	4.19289	-3.63419	0.000278859	0.0161483
Contig5286	ref|XP_012060796.1| PREDICTED: lysM and putative peptidoglycan-binding domain-containing protein 2 [Atta cephalotes]	1.61606	-15.2366	4.18342	-3.64213	0.000270388	0.0157158
Contig102813	ref|XP_011171501.1| PREDICTED: uncharacterized protein LOC105204134 [Solenopsis invicta]	0.338649	-15.2307	4.19386	-3.63167	0.000281594	0.0162786
Contig31480	#N/A	0.397971	-15.23	4.19499	-3.63052	0.000282854	0.0163136
Contig57633	#N/A	0.74742	-15.2253	2.7767	-5.48323	4.17638e-08	1.44281e-05
Contig93231	#N/A	0.23758	-15.2174	4.19622	-3.62646	0.000287337	0.0165242
Contig123331	ref|XP_011159479.1| PREDICTED: D-beta-hydroxybutyrate dehydrogenase, mitochondrial [Solenopsis invicta]	0.41047	-15.2162	4.19906	-3.62372	0.000290397	0.0166527
Contig50513	#N/A	0.277218	-15.2121	4.19354	-3.62752	0.000286156	0.0164749
Contig55783	#N/A	0.60269	-15.2106	4.19499	-3.6259	0.000287962	0.0165466
Contig85366	#N/A	0.377507	-15.2079	4.19247	-3.62744	0.000286247	0.0164749
Contig92420	ref|XP_012249056.1| PREDICTED: uncharacterized protein LOC105681983 [Bombus impatiens]	0.377507	-15.2079	4.19247	-3.62744	0.000286247	0.0164749
Contig56075	#N/A	0.278286	-15.2022	4.20144	-3.61833	0.000296506	0.0169343
Contig20854	ref|XP_011671730.1| PREDICTED: prostaglandin reductase 1 isoform X1 [Strongylocentrotus purpuratus]	4.04667	-15.1962	3.13644	-4.84503	1.2659e-06	0.000241061
Contig44672	#N/A	0.497419	-15.1899	4.18397	-3.6305	0.000282868	0.0163136
Contig65817	ref|XP_013294314.1| ABC transporter, ATP-binding protein [Necator americanus]	0.243547	-15.1818	4.19031	-3.62307	0.000291123	0.0166808
Contig68617	#N/A	0.790313	-15.1754	4.18495	-3.62618	0.000287649	0.0165354
Contig105982	#N/A	0.2036	-15.1717	4.19807	-3.61397	0.00030155	0.0171668
Contig65854	ref|XP_011646262.1| PREDICTED: uncharacterized protein LOC105432942 [Pogonomyrmex barbatus]	0.309273	-15.1666	4.19291	-3.6172	0.000297803	0.0169741
Contig76657	ref|XP_012542889.1| PREDICTED: NADH dehydrogenase [ubiquinone] flavoprotein 1, mitochondrial-like, partial [Monomorium pharaonis]	0.309273	-15.1666	4.19291	-3.6172	0.000297803	0.0169741
Contig52428	ref|XP_012217149.1| PREDICTED: uncharacterized protein LOC105668987 [Linepithema humile]	0.272958	-15.1652	4.19308	-3.61671	0.000298371	0.0169996
Contig118418	ref|XP_011161835.1| PREDICTED: uncharacterized protein C05D11.1-like isoform X2 [Solenopsis invicta]	1.72583	-15.1645	4.18927	-3.61984	0.000294786	0.0168497
Contig37356	ref|XP_012534360.1| PREDICTED: venom allergen 3-like [Monomorium pharaonis]	0.256969	-15.1623	4.19088	-3.61793	0.000296967	0.0169469
Contig127669	ref|XP_011859007.1| PREDICTED: uncharacterized protein LOC105556520 [Vollenhovia emeryi]	0.447969	-15.1534	4.18418	-3.6216	0.000292785	0.0167624
Contig126320	ref|XP_012521308.1| PREDICTED: uncharacterized protein LOC105827759 [Monomorium pharaonis]	45.6893	-15.1533	3.62593	-4.17916	2.9259e-05	0.0024965
Contig49231	ref|XP_011703346.1| PREDICTED: integrin beta-PS-like [Wasmannia auropunctata]	0.283357	-15.1362	4.19836	-3.60526	0.00031184	0.0176823
Contig89936	ref|XP_015517928.1| PREDICTED: uncharacterized protein LOC107222906 [Neodiprion lecontei]	1.32086	-15.123	4.19896	-3.6016	0.000316263	0.0178891
Contig121437	ref|XP_012056069.1| PREDICTED: myosin-IB [Atta cephalotes]	1.00674	-15.1185	4.1786	-3.61807	0.000296805	0.0169445
Contig74436	ref|XP_015524075.1| PREDICTED: uncharacterized protein K02A2.6-like [Neodiprion lecontei]	0.239133	-15.1149	4.19582	-3.60238	0.000315321	0.0178501
Contig81795	#N/A	1.05685	-15.1046	4.18217	-3.61167	0.000304232	0.0172916
Contig47065	#N/A	0.452338	-15.1004	4.19799	-3.59706	0.000321837	0.0181608
Contig61407	#N/A	0.20766	-15.094	4.19829	-3.59526	0.000324069	0.0182794
Contig104395	#N/A	0.345738	-15.0747	4.19584	-3.59276	0.000327193	0.0183969
Contig74454	#N/A	0.245334	-15.0742	4.19338	-3.59476	0.000324692	0.0183072
Contig91362	#N/A	0.317983	-15.0684	4.19397	-3.59288	0.000327042	0.0183957
Contig113870	ref|XP_011870466.1| PREDICTED: uncharacterized protein LOC105563463 isoform X1 [Vollenhovia emeryi]	5.21177	-15.0671	4.18294	-3.60202	0.000315748	0.0178671
Contig59228	#N/A	0.167597	-15.0627	4.19997	-3.58639	0.000335282	0.0187695
Contig34008	#N/A	1.91723	-15.0609	4.19676	-3.58869	0.000332341	0.0186418
Contig37214	ref|XP_013081452.1| PREDICTED: uncharacterized protein LOC106066894 [Biomphalaria glabrata]	0.372078	-15.0506	4.18787	-3.59385	0.000325827	0.0183493
Contig52732	#N/A	0.204724	-15.0498	4.19424	-3.58821	0.000332952	0.018661
Contig76609	ref|XP_015119273.1| PREDICTED: sodium- and chloride-dependent glycine transporter 1-like [Diachasma alloeum]	0.204724	-15.0498	4.19424	-3.58821	0.000332952	0.018661
Contig145962	#N/A	0.393378	-15.0489	4.20194	-3.58141	0.00034174	0.0189921
Contig92174	ref|XP_002161180.1| PREDICTED: 60S ribosomal protein L44 [Hydra vulgaris]	0.703578	-15.0485	4.20596	-3.57789	0.000346373	0.0191852
Contig134162	ref|XP_011644288.1| PREDICTED: acetyl-CoA acetyltransferase, cytosolic [Pogonomyrmex barbatus]	5.9722	-15.0417	2.77962	-5.41141	6.25291e-08	2.00799e-05
Contig41202	#N/A	0.608318	-15.0317	4.19234	-3.5855	0.000336427	0.0188087
Contig122453	#N/A	0.327513	-15.0306	4.19073	-3.58662	0.000334987	0.0187605
Contig45074	ref|XP_011881907.1| PREDICTED: cytosolic carboxypeptidase 2-like [Vollenhovia emeryi]	0.556026	-15.0274	4.19981	-3.57813	0.000346066	0.0191757
Contig98270	ref|XP_011698637.1| PREDICTED: ER membrane protein complex subunit 7 [Wasmannia auropunctata]	0.667813	-15.0233	4.1946	-3.58157	0.000341531	0.0189914
Contig87693	#N/A	0.318696	-15.0232	4.19005	-3.58544	0.000336513	0.0188087
Contig1673	ref|XP_011872275.1| PREDICTED: mutS protein homolog 5-like [Vollenhovia emeryi]	0.382805	-15.0223	4.18668	-3.58811	0.000333079	0.018661
Contig65280	#N/A	0.193494	-15.0221	4.20006	-3.57664	0.000348036	0.0192622
Contig87878	#N/A	0.478438	-15.0091	4.18828	-3.5836	0.000338892	0.0189036
Contig25165	ref|XP_011879656.1| PREDICTED: uncharacterized protein LOC105568530 [Vollenhovia emeryi]	0.986512	-15.0063	4.18768	-3.58343	0.000339106	0.0189036
Contig3009	#N/A	0.949795	-15.0017	3.77652	-3.97236	7.11649e-05	0.00498285
Contig119884	ref|XP_011170369.1| PREDICTED: uncharacterized protein LOC105203292 [Solenopsis invicta]	0.696109	-14.9906	4.18805	-3.57938	0.000344411	0.019099
Contig71704	#N/A	1.64312	-14.9878	4.19836	-3.56991	0.000357098	0.0196713
Contig7454	#N/A	1.98682	-14.9877	4.19887	-3.56945	0.000357728	0.0196906
Contig61391	#N/A	0.193975	-14.9855	4.20014	-3.56785	0.000359926	0.0197731
Contig112944	#N/A	0.204468	-14.9853	4.19897	-3.56881	0.000358609	0.0197161
Contig58870	#N/A	0.174589	-14.9837	4.19549	-3.57137	0.000355118	0.0195698
Contig60734	#N/A	0.174589	-14.9837	4.19549	-3.57137	0.000355118	0.0195698
Contig84877	#N/A	0.174589	-14.9837	4.19549	-3.57137	0.000355118	0.0195698
Contig90875	ref|XP_012530614.1| PREDICTED: high affinity cAMP-specific and IBMX-insensitive 3',5'-cyclic phosphodiesterase 8A isoform X4 [Monomorium pharaonis]	0.174589	-14.9837	4.19549	-3.57137	0.000355118	0.0195698
Contig76911	ref|XP_002739055.1| PREDICTED: phosphotriesterase-related protein-like [Saccoglossus kowalevskii]	1.03326	-14.9815	4.18396	-3.5807	0.000342675	0.0190234
Contig61594	#N/A	0.1991	-14.9789	4.19983	-3.56655	0.000361716	0.0198483
Contig79147	#N/A	0.27723	-14.9584	4.19453	-3.56618	0.000362224	0.0198684
Contig94408	#N/A	0.30193	-14.9329	4.19582	-3.55899	0.000372286	0.0203179
Contig49517	#N/A	0.211294	-14.9204	4.19878	-3.55351	0.000380132	0.0206662
Contig104593	#N/A	0.666067	-14.9192	4.19241	-3.55863	0.000372795	0.0203377
Contig122185	#N/A	13.2816	-14.9155	4.19041	-3.55943	0.000371657	0.0202913
Contig44637	ref|XP_012533213.1| PREDICTED: uncharacterized protein LOC105834908 isoform X1 [Monomorium pharaonis]	0.342512	-14.9067	4.194	-3.5543	0.000378983	0.0206136
Contig62843	ref|XP_011858461.1| PREDICTED: uncharacterized protein K02A2.6-like [Vollenhovia emeryi]	0.682456	-14.9009	4.20441	-3.5441	0.000393949	0.0212782
Contig100018	#N/A	0.211841	-14.8966	4.19427	-3.55167	0.000382799	0.0207712
Contig100846	ref|XP_011876325.1| PREDICTED: probable cytochrome P450 12a5, mitochondrial [Vollenhovia emeryi]	0.211841	-14.8966	4.19427	-3.55167	0.000382799	0.0207712
Contig137282	ref|XP_012542600.1| PREDICTED: transcription elongation factor B polypeptide 1 isoform X2 [Monomorium pharaonis]	0.211841	-14.8966	4.19427	-3.55167	0.000382799	0.0207712
Contig33822	#N/A	1.04834	-14.8878	4.18123	-3.56063	0.000369963	0.0202223
Contig75541	ref|XP_003730293.1| PREDICTED: LOW QUALITY PROTEIN: proline synthase co-transcribed bacterial homolog protein [Strongylocentrotus purpuratus]	0.31949	-14.8873	4.20507	-3.54033	0.000399625	0.0214944
Contig62919	#N/A	1.58782	-14.8826	4.17628	-3.5636	0.000365805	0.0200443
Contig27072	ref|XP_012535107.1| PREDICTED: cilia- and flagella-associated protein 70 [Monomorium pharaonis]	0.322801	-14.8819	4.18705	-3.55428	0.000379018	0.0206136
Contig101323	#N/A	1.09602	-14.8797	4.17977	-3.55994	0.000370936	0.0202676
Contig27888	#N/A	0.462878	-14.8777	4.19711	-3.54475	0.000392989	0.0212426
Contig95765	#N/A	0.331826	-14.8699	4.1943	-3.54525	0.00039224	0.0212315
Contig32244	#N/A	0.351994	-14.8685	4.20184	-3.53858	0.00040228	0.0216208
Contig142085	#N/A	0.17352	-14.8683	4.20357	-3.53707	0.000404587	0.0216788
Contig119187	#N/A	0.314603	-14.8677	4.19656	-3.54283	0.000395862	0.0213163
Contig43498	ref|XP_011861941.1| PREDICTED: thioredoxin domain-containing protein 11 isoform X1 [Vollenhovia emeryi]	4.20512	-14.8667	3.53276	-4.20826	2.57348e-05	0.00226417
Contig50539	#N/A	0.170607	-14.8658	4.19521	-3.54352	0.000394831	0.0212807
Contig52528	#N/A	0.170607	-14.8658	4.19521	-3.54352	0.000394831	0.0212807
Contig80072	#N/A	0.170607	-14.8658	4.19521	-3.54352	0.000394831	0.0212807
Contig85184	#N/A	0.170607	-14.8658	4.19521	-3.54352	0.000394831	0.0212807
Contig34662	ref|XP_011875564.1| PREDICTED: uncharacterized protein LOC105566285 [Vollenhovia emeryi]	3.44087	-14.8598	4.176	-3.55838	0.000373149	0.0203492
Contig52270	ref|XP_015789038.1| PREDICTED: 60S ribosomal protein L26-like [Tetranychus urticae]	0.486516	-14.8576	4.19909	-3.5383	0.000402718	0.0216359
Contig148353	ref|XP_011703975.1| PREDICTED: uncharacterized protein KIAA0556-like isoform X1 [Wasmannia auropunctata]	1.11609	-14.8559	4.18338	-3.55117	0.000383526	0.0208027
Contig61733	ref|XP_012054020.1| PREDICTED: TFIIH basal transcription factor complex helicase XPD subunit [Atta cephalotes]	2.164	-14.8508	4.17824	-3.55431	0.000378971	0.0206136
Contig119847	#N/A	0.65163	-14.8365	4.19388	-3.53765	0.00040371	0.0216608
Contig76938	#N/A	0.21836	-14.8356	4.19414	-3.53723	0.000404344	0.021674
Contig49409	#N/A	0.515445	-14.8322	4.18375	-3.54519	0.000392333	0.0212315
Contig11039	ref|XP_011858988.1| PREDICTED: uncharacterized protein LOC105556501 [Vollenhovia emeryi]	2.43989	-14.8221	4.19747	-3.53121	0.000413665	0.0220731
Contig78673	#N/A	0.350898	-14.8186	4.19978	-3.52843	0.000418028	0.022222
Contig143947	#N/A	0.348217	-14.8183	4.19126	-3.53552	0.000406966	0.0217568
Contig61794	ref|XP_011873622.1| PREDICTED: uncharacterized protein LOC105565222 isoform X2 [Vollenhovia emeryi]	0.293736	-14.8113	4.18884	-3.53589	0.0004064	0.0217347
Contig135192	ref|XP_011699132.1| PREDICTED: uncharacterized protein LOC105456632 [Wasmannia auropunctata]	0.476728	-14.8003	4.19291	-3.52985	0.000415796	0.022145
Contig114395	ref|XP_011687239.1| PREDICTED: uncharacterized protein LOC105449634 [Wasmannia auropunctata]	0.383649	-14.7877	4.20414	-3.51742	0.000435767	0.0229663
Contig8683	ref|YP_009114111.1| cytochrome c oxidase subunit I (mitochondrion) [Euphaea yayeyamana]	2.23819	-14.7829	3.78071	-3.91008	9.22657e-05	0.0062288
Contig148930	ref|XP_011156876.1| PREDICTED: cytochrome P450 4C1-like [Solenopsis invicta]	0.786184	-14.7829	4.1946	-3.52426	0.000424673	0.0225075
Contig45166	ref|XP_011704625.1| PREDICTED: fibril-forming collagen alpha chain-like [Wasmannia auropunctata]	0.198494	-14.7776	4.19568	-3.52211	0.000428129	0.0226531
Contig49800	#N/A	0.261522	-14.7684	4.19662	-3.51911	0.000433001	0.0228631
Contig112829	#N/A	1.0849	-14.7629	4.1997	-3.51523	0.00043938	0.0231195
Contig76318	#N/A	0.212856	-14.7465	4.20182	-3.50956	0.000448851	0.023535
Contig14372	ref|XP_012062510.1| PREDICTED: replication factor C subunit 1 [Atta cephalotes]	2.79555	-14.7419	3.61081	-4.08271	4.45143e-05	0.0034017
Contig37373	ref|XP_011872366.1| PREDICTED: uncharacterized protein LOC105564534 [Vollenhovia emeryi]	12.2749	-14.7298	4.19009	-3.51539	0.000439115	0.0231168
Contig20614	#N/A	0.419422	-14.727	4.18863	-3.51596	0.000438172	0.0230758
Contig112992	ref|XP_011864369.1| PREDICTED: valine--tRNA ligase, mitochondrial-like isoform X1 [Vollenhovia emeryi]	1.23628	-14.7194	4.19845	-3.50592	0.000455034	0.0237777
Contig50382	#N/A	0.164833	-14.717	4.20596	-3.49909	0.000466842	0.0242423
Contig78670	#N/A	0.34438	-14.7084	4.19091	-3.50958	0.000448811	0.023535
Contig149670	#N/A	0.55266	-14.7002	4.20079	-3.4994	0.000466314	0.0242327
Contig47938	#N/A	0.117863	-14.6938	4.19858	-3.4997	0.000465774	0.0242238
Contig56145	#N/A	0.117863	-14.6938	4.19858	-3.4997	0.000465774	0.0242238
Contig85390	#N/A	0.117863	-14.6938	4.19858	-3.4997	0.000465774	0.0242238
Contig93081	ref|XP_011158259.1| PREDICTED: astacin-like isoform X1 [Solenopsis invicta]	0.117863	-14.6938	4.19858	-3.4997	0.000465774	0.0242238
Contig93337	#N/A	0.117863	-14.6938	4.19858	-3.4997	0.000465774	0.0242238
Contig54940	ref|XP_011883882.1| PREDICTED: uncharacterized protein LOC105571024 [Vollenhovia emeryi]	0.38202	-14.6893	4.19802	-3.4991	0.000466839	0.0242423
Contig11052	ref|XP_011647382.1| PREDICTED: LOW QUALITY PROTEIN: ribosomal protein S6 kinase 2 beta-like [Pogonomyrmex barbatus]	3.09137	-14.6857	4.19079	-3.50428	0.00045784	0.0239155
Contig140058	ref|XP_011873691.1| PREDICTED: GDP-fucose transporter 1 [Vollenhovia emeryi]	1.24496	-14.6773	4.17555	-3.51506	0.00043966	0.0231197
Contig33485	#N/A	0.502802	-14.6759	4.18404	-3.50759	0.00045218	0.0236636
Contig67920	ref|XP_017082551.1| PREDICTED: endonuclease III-like [Drosophila eugracilis]	0.484414	-14.6655	4.18866	-3.50124	0.000463103	0.0241485
Contig108464	ref|XP_012146863.1| PREDICTED: phospholipid scramblase 2-like isoform X1 [Megachile rotundata]	0.371663	-14.6616	4.19359	-3.49619	0.000471952	0.0244325
Contig92156	#N/A	0.190723	-14.656	4.1961	-3.49276	0.000478054	0.0246975
Contig30778	ref|XP_011169789.1| PREDICTED: uncharacterized protein LOC105202807 [Solenopsis invicta]	0.364585	-14.6492	4.20287	-3.48553	0.000491157	0.0252269
Contig61322	#N/A	0.617956	-14.6463	4.19479	-3.49155	0.000480233	0.0247738
Contig78629	#N/A	0.382863	-14.6462	4.20263	-3.48502	0.000492095	0.0252475
Contig33451	#N/A	0.276807	-14.6226	4.18916	-3.49057	0.000481988	0.024838
Contig64237	#N/A	0.377848	-14.6172	4.19393	-3.48533	0.000491538	0.0252305
Contig79223	ref|XP_012542605.1| PREDICTED: outer dense fiber protein 3-like, partial [Monomorium pharaonis]	0.167187	-14.6101	4.19771	-3.48049	0.00050049	0.025576
Contig88645	#N/A	0.167187	-14.6101	4.19771	-3.48049	0.00050049	0.025576
Contig21949	ref|XP_015928043.1| PREDICTED: sulfotransferase family cytosolic 1B member 1-like [Parasteatoda tepidariorum]	1.51631	-14.6005	4.19114	-3.48367	0.000494587	0.0253385
Contig103667	#N/A	0.272476	-14.5909	4.19455	-3.47854	0.000504146	0.0257217
Contig85246	#N/A	0.175461	-14.5869	4.19728	-3.47532	0.000510241	0.025971
Contig46020	#N/A	0.290198	-14.5857	4.19301	-3.47859	0.000504068	0.0257217
Contig35217	ref|XP_011873858.1| PREDICTED: rotatin isoform X2 [Vollenhovia emeryi]	5.05651	-14.5821	4.18569	-3.4838	0.000494352	0.0253357
Contig95309	#N/A	0.19333	-14.5557	4.19733	-3.46785	0.000524641	0.026589
Contig74991	#N/A	0.223255	-14.5343	4.19739	-3.46269	0.000534805	0.0270363
Contig149534	#N/A	0.219354	-14.5292	4.20158	-3.45804	0.000544115	0.0274186
Contig61892	#N/A	0.301359	-14.5266	4.20165	-3.45734	0.000545528	0.0274409
Contig80703	#N/A	2.51368	-14.5257	4.19084	-3.46605	0.000528173	0.0267584
Contig55553	#N/A	0.1576	-14.5244	4.19588	-3.46159	0.000537002	0.0270989
Contig62750	#N/A	0.1576	-14.5244	4.19588	-3.46159	0.000537002	0.0270989
Contig72214	ref|XP_008212069.1| PREDICTED: uncharacterized protein LOC100680303 [Nasonia vitripennis]	0.1576	-14.5244	4.19588	-3.46159	0.000537002	0.0270989
Contig86093	ref|XP_012521490.1| PREDICTED: putative leucine-rich repeat-containing protein DDB_G0290503 [Monomorium pharaonis]	0.540343	-14.5185	4.20074	-3.45617	0.000547916	0.0275316
Contig81510	#N/A	0.282534	-14.5171	4.20332	-3.45372	0.000552904	0.0277329
Contig37912	#N/A	0.173112	-14.5102	4.19727	-3.45706	0.000546098	0.02745
Contig91376	#N/A	0.173112	-14.5102	4.19727	-3.45706	0.000546098	0.02745
Contig95792	#N/A	0.168694	-14.5066	4.19569	-3.45751	0.000545197	0.0274399
Contig56470	ref|XP_011863304.1| PREDICTED: cation-independent mannose-6-phosphate receptor [Vollenhovia emeryi]	0.316024	-14.5015	4.19428	-3.45745	0.000545314	0.0274399
Contig78607	#N/A	0.722012	-14.5011	3.81195	-3.80412	0.000142307	0.00909025
Contig32731	#N/A	0.504093	-14.4922	4.20596	-3.44563	0.00056972	0.028425
Contig53698	#N/A	0.274924	-14.4921	4.19959	-3.45085	0.00055882	0.0279602
Contig115740	#N/A	0.381651	-14.4879	4.19971	-3.44974	0.000561129	0.0280558
Contig84952	#N/A	0.402374	-14.469	4.2021	-3.44328	0.000574694	0.0285924
Contig81218	ref|XP_001659191.1| AAEL001411-PB [Aedes aegypti]	0.311366	-14.4623	4.19649	-3.44629	0.000568331	0.0283758
Contig78347	ref|XP_011863695.1| PREDICTED: centrosomal protein of 152 kDa-like isoform X2 [Vollenhovia emeryi]	1.87823	-14.4617	4.17774	-3.46161	0.00053695	0.0270989
Contig79830	#N/A	0.622924	-14.4611	4.18565	-3.45493	0.000550428	0.0276382
Contig75576	#N/A	0.439293	-14.4486	4.19646	-3.44304	0.000575205	0.0286078
Contig91000	#N/A	0.345917	-14.4479	4.1929	-3.4458	0.000569381	0.0284182
Contig56974	ref|XP_011870113.1| PREDICTED: UPF0565 protein C2orf69 homolog isoform X1 [Vollenhovia emeryi]	0.146748	-14.4407	4.1976	-3.44022	0.000581243	0.0288776
Contig40394	ref|XP_012534665.1| PREDICTED: protein MTO1 homolog, mitochondrial-like [Monomorium pharaonis]	0.260152	-14.4383	4.19594	-3.44102	0.000579534	0.0288129
Contig70520	ref|XP_011686935.1| PREDICTED: CD109 antigen-like isoform X1 [Wasmannia auropunctata]	0.437854	-14.419	4.2034	-3.43032	0.00060286	0.0297944
Contig113774	#N/A	0.306241	-14.4173	4.19378	-3.43778	0.000586511	0.0290984
Contig110337	ref|XP_011165057.1| PREDICTED: uncharacterized protein LOC105199598 [Solenopsis invicta]	0.39711	-14.4166	4.19154	-3.43945	0.000582896	0.0289495
Contig132141	#N/A	0.377938	-14.4162	4.20106	-3.43155	0.000600145	0.0296914
Contig73419	ref|XP_011064282.1| PREDICTED: uncharacterized protein LOC105151975 [Acromyrmex echinatior]	1.43121	-14.4051	4.19889	-3.43068	0.00060206	0.0297729
Contig80708	ref|XP_011868641.1| PREDICTED: F-box/LRR-repeat protein 4-like isoform X2 [Vollenhovia emeryi]	0.549495	-14.4015	4.20204	-3.42726	0.000609701	0.0300904
Contig108429	#N/A	2.06555	-14.397	3.20789	-4.488	7.18944e-06	0.000946735
Contig137611	ref|XP_014609021.1| PREDICTED: nuclear factor 1 X-type isoform X3 [Polistes canadensis]	1.17139	-14.3957	4.18827	-3.43714	0.000587895	0.0291189
Contig12929	#N/A	0.133634	-14.3866	4.19703	-3.42781	0.000608466	0.0300505
Contig86256	#N/A	0.133634	-14.3866	4.19703	-3.42781	0.000608466	0.0300505
Contig80273	#N/A	0.331808	-14.386	4.1999	-3.42532	0.000614077	0.0302641
Contig11726	ref|XP_002731044.1| PREDICTED: profilin-2-like [Saccoglossus kowalevskii]	0.543538	-14.3809	4.20042	-3.42369	0.000617771	0.0304144
Contig97509	#N/A	2.32622	-14.3751	4.19025	-3.43062	0.000602213	0.0297729
Contig120359	ref|XP_011703476.1| PREDICTED: nephrin-like isoform X4 [Wasmannia auropunctata]	0.191011	-14.3738	4.19492	-3.42647	0.00061148	0.0301466
Contig125976	#N/A	0.191011	-14.3738	4.19492	-3.42647	0.00061148	0.0301466
Contig147434	#N/A	0.191011	-14.3738	4.19492	-3.42647	0.00061148	0.0301466
Contig11749	ref|XP_012248857.1| PREDICTED: uncharacterized protein LOC105681911 [Bombus impatiens]	0.567553	-14.3707	4.19879	-3.42257	0.000620314	0.0305183
Contig72225	#N/A	0.159892	-14.3606	4.1985	-3.42041	0.000625265	0.0307298
Contig55731	#N/A	0.309154	-14.355	4.18816	-3.42752	0.000609125	0.0300725
Contig36591	#N/A	0.18711	-14.3514	4.1953	-3.42083	0.000624294	0.0306927
Contig90994	#N/A	0.217745	-14.3474	4.1966	-3.4188	0.000628973	0.0308905
Contig53130	#N/A	0.380833	-14.3443	4.19629	-3.41831	0.000630102	0.0309245
Contig63283	ref|XP_014472522.1| PREDICTED: WD repeat-containing protein 81 isoform X1 [Dinoponera quadriceps]	0.306401	-14.3404	4.19541	-3.41811	0.000630587	0.0309375
Contig69126	#N/A	0.456748	-14.3397	4.20105	-3.41337	0.00064164	0.0313492
Contig139143	#N/A	0.532443	-14.3397	4.19842	-3.4155	0.000636648	0.0311808
Contig53192	ref|XP_011688585.1| PREDICTED: uncharacterized protein LOC105450444 [Wasmannia auropunctata]	0.450965	-14.3375	4.19301	-3.41937	0.000627653	0.0308364
Contig71137	#N/A	0.692842	-14.3282	4.2004	-3.41116	0.000646868	0.0315501
Contig84392	#N/A	0.154695	-14.322	4.1976	-3.41196	0.00064498	0.0314797
Contig93916	ref|XP_013189495.1| PREDICTED: uncharacterized protein LOC106134085 [Amyelois transitella]	0.154695	-14.322	4.1976	-3.41196	0.00064498	0.0314797
Contig124393	#N/A	0.214413	-14.3199	4.19435	-3.41409	0.000639955	0.0312885
Contig41819	#N/A	0.136279	-14.3111	4.198	-3.40904	0.000651927	0.0317749
Contig45224	#N/A	0.136279	-14.3111	4.198	-3.40904	0.000651927	0.0317749
Contig26822	#N/A	1.4896	-14.2816	3.9229	-3.64059	0.000272018	0.015804
Contig92121	ref|XP_011680090.1| PREDICTED: glycerol-3-phosphate dehydrogenase, mitochondrial isoform X2 [Strongylocentrotus purpuratus]	2.17895	-14.273	4.18011	-3.4145	0.000638994	0.0312848
Contig135269	#N/A	0.16804	-14.271	4.1959	-3.40119	0.000670938	0.0325331
Contig11700	ref|XP_011158772.1| PREDICTED: CREB-binding protein isoform X3 [Solenopsis invicta]	0.460901	-14.2679	4.20408	-3.39382	0.000689258	0.0332844
Contig91247	#N/A	0.552568	-14.2636	4.19335	-3.40148	0.000670219	0.0325206
Contig146453	#N/A	0.522416	-14.2629	4.19072	-3.40344	0.000665433	0.0323217
Contig60664	#N/A	0.144507	-14.2616	4.19797	-3.39727	0.00068062	0.0329123
Contig71785	#N/A	0.144507	-14.2616	4.19797	-3.39727	0.00068062	0.0329123
Contig77683	#N/A	0.144507	-14.2616	4.19797	-3.39727	0.00068062	0.0329123
Contig86920	#N/A	0.144507	-14.2616	4.19797	-3.39727	0.00068062	0.0329123
Contig132894	#N/A	0.419779	-14.2566	4.20207	-3.39276	0.000691935	0.0333794
Contig129552	#N/A	0.518681	-14.251	4.1986	-3.39424	0.000688202	0.0332561
Contig40531	ref|XP_012220713.1| PREDICTED: uncharacterized protein LOC105671287 isoform X1 [Linepithema humile]	0.788191	-14.2509	4.1997	-3.39331	0.000690526	0.0333342
Contig352	#N/A	2.50213	-14.2496	4.19057	-3.4004	0.000672877	0.032616
Contig82818	#N/A	0.895589	-14.2496	4.20314	-3.39023	0.000698342	0.0336196
Contig56952	#N/A	0.337091	-14.2486	4.20072	-3.39194	0.000693987	0.0334466
Contig65535	#N/A	0.174793	-14.2363	4.19712	-3.39192	0.000694038	0.0334466
Contig48017	#N/A	0.404325	-14.2328	4.20127	-3.38774	0.000704703	0.0338682
Contig80201	#N/A	0.191528	-14.2273	4.19709	-3.38979	0.000699453	0.0336502
Contig98552	#N/A	0.191528	-14.2273	4.19709	-3.38979	0.000699453	0.0336502
Contig67599	ref|XP_016936021.1| PREDICTED: ras-related protein Rab-11A [Drosophila suzukii]	0.162006	-14.224	4.19814	-3.38816	0.000703627	0.0338279
Contig125902	ref|XP_011699345.1| PREDICTED: uncharacterized protein LOC105456759 [Wasmannia auropunctata]	22.8371	-14.1962	4.18396	-3.393	0.000691309	0.0333606
Contig92858	#N/A	0.234466	-14.1942	4.20103	-3.37874	0.000728178	0.0348778
Contig32875	ref|XP_011169185.1| PREDICTED: protein lifeguard 1-like [Solenopsis invicta]	0.484834	-14.184	4.20089	-3.37642	0.000734369	0.0350792
Contig75466	#N/A	0.541632	-14.1738	4.19947	-3.37514	0.00073778	0.0352064
Contig53772	#N/A	0.57866	-14.1733	4.19616	-3.37769	0.000730984	0.0349612
Contig54111	ref|XP_011868811.1| PREDICTED: LOW QUALITY PROTEIN: WD repeat-containing protein 66-like [Vollenhovia emeryi]	0.777443	-14.1661	4.20262	-3.37077	0.000749581	0.0357092
Contig101571	ref|XP_011861844.1| PREDICTED: peroxisomal biogenesis factor 19 [Vollenhovia emeryi]	0.316051	-14.1565	4.20019	-3.37044	0.000750472	0.0357396
Contig34923	#N/A	0.542202	-14.1308	4.19947	-3.36489	0.000765746	0.0363445
Contig30602	#N/A	0.613289	-14.112	4.20062	-3.3595	0.000780832	0.0369736
Contig104323	#N/A	0.229793	-14.1111	4.19463	-3.3641	0.000767942	0.0364243
Contig42198	#N/A	27.3148	-14.1042	4.20035	-3.35787	0.000785465	0.0371308
Contig28475	ref|XP_015785005.1| PREDICTED: elongation factor 1-alpha [Tetranychus urticae]	0.707427	-14.0992	4.19186	-3.36347	0.000769687	0.0364948
Contig48569	ref|XP_011870676.1| PREDICTED: uncharacterized protein LOC105563585 isoform X1 [Vollenhovia emeryi]	0.365006	-14.0954	4.20103	-3.35523	0.000792992	0.0374615
Contig100564	#N/A	0.294487	-14.0818	4.20581	-3.34818	0.00081344	0.0382994
Contig142142	#N/A	0.32998	-14.0693	4.2041	-3.34656	0.000818205	0.0384941
Contig74029	ref|XP_012542435.1| PREDICTED: tyrosine-protein phosphatase Lar isoform X10 [Monomorium pharaonis]	0.829673	-14.0667	4.19304	-3.35478	0.000794275	0.0375096
Contig20132	#N/A	0.224632	-14.0618	4.19716	-3.35033	0.000807162	0.0380673
Contig48831	ref|XP_011860170.1| PREDICTED: uncharacterized protein LOC105557523 [Vollenhovia emeryi]	0.202838	-14.0536	4.19696	-3.34852	0.000812446	0.0382654
Contig58040	#N/A	0.155022	-14.0385	4.19699	-3.3449	0.000823123	0.0386522
Contig60639	#N/A	0.210905	-14.0318	4.19509	-3.34481	0.000823394	0.0386522
Contig79353	#N/A	0.210905	-14.0318	4.19509	-3.34481	0.000823394	0.0386522
Contig45691	#N/A	0.386383	-14.0234	4.2	-3.33891	0.000841092	0.0393132
Contig62469	ref|XP_011859152.1| PREDICTED: uncharacterized protein LOC105556668 [Vollenhovia emeryi]	0.394107	-14.0204	4.19606	-3.34132	0.000833805	0.039089
Contig66032	ref|XP_011637602.1| PREDICTED: bestrophin-2 isoform X3 [Pogonomyrmex barbatus]	1.4583	-14.0185	4.15719	-3.37212	0.000745929	0.0355472
Contig72095	ref|XP_011697546.1| PREDICTED: uncharacterized protein LOC105455715 [Wasmannia auropunctata]	0.26348	-14.0162	4.20478	-3.33339	0.000857949	0.0399821
Contig45753	#N/A	0.596751	-14.0074	4.19247	-3.34107	0.000834551	0.039111
Contig41347	ref|NP_001171838.1| methylmalonyl-CoA mutase, mitochondrial [Saccoglossus kowalevskii]	0.24104	-14.0053	4.19392	-3.33942	0.000839539	0.0392536
Contig55488	#N/A	0.24104	-14.0053	4.19392	-3.33942	0.000839539	0.0392536
Contig94158	ref|XP_011685003.1| PREDICTED: uncharacterized protein LOC105448237 [Wasmannia auropunctata]	0.557387	-14.0017	4.20419	-3.33042	0.000867147	0.0403309
Contig53466	#N/A	0.621262	-13.985	4.20209	-3.32812	0.000874343	0.0406121
Contig87966	#N/A	0.709846	-13.9788	4.19262	-3.33413	0.000855665	0.0399019
Contig101900	#N/A	0.433645	-13.9691	4.19905	-3.32674	0.000878689	0.0407738
Contig71783	#N/A	0.374538	-13.9564	4.19516	-3.32679	0.000878536	0.0407738
Contig73308	#N/A	0.28421	-13.9558	4.19764	-3.32469	0.000885171	0.0410543
Contig116265	ref|XP_011173181.1| PREDICTED: E3 UFM1-protein ligase 1 homolog [Solenopsis invicta]	0.435253	-13.9498	4.20071	-3.32081	0.000897564	0.0415677
Contig56498	ref|XP_011157951.1| PREDICTED: forkhead box protein P1 isoform X4 [Solenopsis invicta]	1.10127	-13.9486	4.1916	-3.32776	0.000875486	0.0406519
Contig7004	ref|XP_012247586.1| PREDICTED: 30S ribosomal protein S3, chloroplastic-like [Bombus impatiens]	0.607825	-13.9464	4.20206	-3.31896	0.000903546	0.0418173
Contig45851	#N/A	0.767053	-13.9381	4.19368	-3.32359	0.000888652	0.0411909
Contig60006	ref|XP_011689445.1| PREDICTED: LOW QUALITY PROTEIN: la-related protein 7 [Wasmannia auropunctata]	0.382827	-13.9367	4.20147	-3.31709	0.000909607	0.0420427
Contig43112	ref|XP_012058171.1| PREDICTED: GATA zinc finger domain-containing protein 14 [Atta cephalotes]	0.142129	-13.9161	4.19775	-3.31513	0.000916019	0.0422838
Contig78268	#N/A	0.235049	-13.9145	4.20407	-3.30977	0.000933739	0.0429475
Contig47581	ref|XP_011157749.1| PREDICTED: 26S proteasome non-ATPase regulatory subunit 12 [Solenopsis invicta]	2.32503	-13.9141	4.03935	-3.44463	0.000571838	0.0285005
Contig53504	ref|XP_011155399.1| PREDICTED: proton-coupled amino acid transporter 1-like [Solenopsis invicta]	0.206923	-13.8944	4.1953	-3.3119	0.000926648	0.0426519
Contig91170	#N/A	0.206923	-13.8944	4.1953	-3.3119	0.000926648	0.0426519
Contig70084	ref|XP_012565798.1| PREDICTED: uncharacterized protein LOC105849894, partial [Hydra vulgaris]	22.6921	-13.8853	4.19792	-3.30767	0.000940765	0.0432284
Contig35610	ref|XP_011860076.1| PREDICTED: aminopeptidase N-like [Vollenhovia emeryi]	1.81797	-13.8785	4.00192	-3.46797	0.000524404	0.0265866
Contig56776	ref|XP_011869208.1| PREDICTED: uncharacterized protein LOC105562756 isoform X2 [Vollenhovia emeryi]	0.970029	-13.8602	4.1993	-3.30059	0.000964812	0.0441467
Contig136679	ref|XP_013785591.1| PREDICTED: 60S ribosomal protein L4-like [Limulus polyphemus]	2.58494	-13.8506	4.19437	-3.30219	0.000959333	0.043953
Contig41160	#N/A	0.681717	-13.8457	4.19629	-3.29951	0.000968548	0.0442392
Contig98841	#N/A	0.974311	-13.8421	4.19293	-3.3013	0.000962388	0.0440501
Contig57371	#N/A	0.513698	-13.8359	4.19928	-3.29482	0.000984864	0.044893
Contig21713	#N/A	13611.5	-13.8315	2.6344	-5.25034	1.51816e-07	4.06271e-05
Contig69597	#N/A	0.966199	-13.8294	4.20563	-3.28832	0.00100789	0.0458209
Contig90640	ref|XP_015591436.1| PREDICTED: disks large 1 tumor suppressor protein isoform X16 [Cephus cinctus]	0.498745	-13.8094	4.20044	-3.28762	0.00101038	0.0459046
Contig125434	ref|XP_011879621.1| PREDICTED: voltage-dependent calcium channel type A subunit alpha-1-like isoform X6 [Vollenhovia emeryi]	0.363553	-13.8083	4.20184	-3.28624	0.00101533	0.0460704
Contig94144	#N/A	1.17472	-13.8008	4.19338	-3.2911	0.000997966	0.0453991
Contig117852	ref|XP_011695183.1| PREDICTED: alpha-ketoglutarate-dependent dioxygenase alkB homolog 4 [Wasmannia auropunctata]	2.55607	-13.7972	4.1995	-3.28544	0.00101824	0.0461728
Contig47139	ref|XP_015760650.1| PREDICTED: ADP-ribosylation factor GTPase-activating protein 3-like [Acropora digitifera]	0.48845	-13.7925	4.19646	-3.2867	0.00101369	0.0460404
Contig94440	#N/A	0.141044	-13.7914	4.19847	-3.28486	0.00102034	0.046253
Contig86924	#N/A	0.33753	-13.7898	4.20429	-3.27994	0.0010383	0.0469467
Contig101859	ref|XP_011693677.1| PREDICTED: pyridoxine-5'-phosphate oxidase isoform X1 [Wasmannia auropunctata]	1.04465	-13.7827	4.20099	-3.28083	0.00103502	0.0468285
Contig60653	#N/A	0.410391	-13.7814	4.20523	-3.27719	0.00104845	0.0473452
Contig88687	ref|XP_011065816.1| PREDICTED: uncharacterized protein LOC105152949 [Acromyrmex echinatior]	0.709605	-13.7806	4.20105	-3.28026	0.0010371	0.0469074
Contig119104	ref|XP_011158730.1| PREDICTED: TBC1 domain family member 22B [Solenopsis invicta]	9.0908	-13.7794	4.1702	-3.30425	0.000952305	0.0437302
Contig38569	ref|XP_011634702.1| PREDICTED: uncharacterized protein LOC105425566 isoform X2 [Pogonomyrmex barbatus]	0.370566	-13.7455	4.20596	-3.26811	0.00108267	0.0486724
Contig32117	#N/A	0.442928	-13.7436	4.19644	-3.27507	0.00105635	0.0476564
Contig49595	ref|XP_011689022.1| PREDICTED: probable 4-coumarate--CoA ligase 3 [Wasmannia auropunctata]	12.5299	-13.7315	4.20574	-3.26495	0.00109484	0.0491728
Contig55127	ref|XP_011875754.1| PREDICTED: uncharacterized protein LOC105566402 [Vollenhovia emeryi]	0.780171	-13.7186	4.19323	-3.2716	0.0010694	0.0481794
Contig57535	#N/A	0.803108	-13.7053	4.19947	-3.26357	0.00110016	0.0493805
Contig62220	ref|XP_012225824.1| PREDICTED: LOW QUALITY PROTEIN: uncharacterized protein LOC105674220 [Linepithema humile]	0.2602	-13.6992	4.20162	-3.26045	0.00111236	0.0498805
Contig85744	#N/A	0.648221	-13.6588	3.73482	-3.65716	0.000255021	0.0149715
Contig40615	ref|XP_011687032.1| PREDICTED: uncharacterized protein LOC105449474 [Wasmannia auropunctata]	2.38618	-13.2876	3.936	-3.37591	0.000735731	0.0351205
Contig93426	#N/A	3.54331	-13.2107	3.07144	-4.30114	1.69919e-05	0.00170367
Contig58377	ref|XP_011861491.1| PREDICTED: UDP-galactose translocator isoform X2 [Vollenhovia emeryi]	3.09968	-12.9234	3.65393	-3.53686	0.000404918	0.0216831
Contig11706	#N/A	2.97989	-12.7081	3.63297	-3.49799	0.000468783	0.0243163
Contig27793	ref|XP_011868223.1| PREDICTED: keratin, type II cytoskeletal 1 isoform X1 [Vollenhovia emeryi]	1.90679	-12.7033	3.89197	-3.26398	0.00109859	0.0493257
Contig132705	ref|XP_011686677.1| PREDICTED: uncharacterized protein LOC105449262 isoform X2 [Wasmannia auropunctata]	2.39713	-12.5722	3.80792	-3.3016	0.00096134	0.0440163
Contig21715	#N/A	1219.29	-12.4213	2.61025	-4.75865	1.94888e-06	0.000343509
Contig95128	ref|XP_011876482.1| PREDICTED: sodium-dependent nutrient amino acid transporter 1-like isoform X1 [Vollenhovia emeryi]	2.10564	-12.1751	2.87252	-4.23846	2.25062e-05	0.00206766
Contig21714	#N/A	1284.31	-11.6729	2.8381	-4.11291	3.90701e-05	0.00308474
Contig10906	ref|XP_012055255.1| PREDICTED: pleckstrin homology domain-containing family J member 1-like [Atta cephalotes]	29.4811	-11.3304	2.95408	-3.83552	0.000125298	0.00813242
Contig57398	ref|XP_968724.1| PREDICTED: pathogenesis-related protein 5 [Tribolium castaneum]	4.00696	-11.0324	3.14642	-3.50635	0.000454299	0.0237569
Contig6247	ref|XP_011863092.1| PREDICTED: spectrin alpha chain isoform X3 [Vollenhovia emeryi]	29.4597	-10.8437	2.53865	-4.27145	1.94208e-05	0.001868
Contig71923	ref|XP_011066062.1| PREDICTED: U4/U6.U5 tri-snRNP-associated protein 1 [Acromyrmex echinatior]	48.5924	-10.2658	2.63352	-3.89815	9.69319e-05	0.00649416
Contig138131	ref|XP_011870620.1| PREDICTED: lipase 3-like [Vollenhovia emeryi]	70.8695	-9.74442	2.24427	-4.34191	1.4125e-05	0.00150232
Contig2443	#N/A	3.93382	-6.49328	1.80412	-3.59914	0.000319269	0.0180303
Contig5330	#N/A	167.685	-5.61499	1.54018	-3.64567	0.000266701	0.0155398
Contig51590	ref|XP_012058670.1| PREDICTED: RCC1 and BTB domain-containing protein 1-like [Atta cephalotes]	18.4167	-5.34101	1.45453	-3.672	0.000240664	0.0142519
Contig49841	ref|XP_011870235.1| PREDICTED: RNA exonuclease 1 homolog [Vollenhovia emeryi]	19.873	-5.29503	1.35844	-3.89786	9.70463e-05	0.00649874
Contig110270	ref|XP_012527141.1| PREDICTED: homer protein homolog 1 isoform X1 [Monomorium pharaonis]	6.34298	-5.2451	1.46054	-3.59121	0.000329149	0.0184995
Contig14549	ref|XP_011875911.1| PREDICTED: alpha-(1,6)-fucosyltransferase [Vollenhovia emeryi]	37.7921	-5.20801	1.29285	-4.02831	5.61795e-05	0.00408544
Contig145535	ref|XP_011862820.1| PREDICTED: kinesin-associated protein 3 isoform X1 [Vollenhovia emeryi]	19.3881	-5.16412	1.37196	-3.76403	0.000167194	0.0104379
Contig92057	ref|XP_011693337.1| PREDICTED: conserved oligomeric Golgi complex subunit 7 [Wasmannia auropunctata]	25.6159	-4.88216	1.40863	-3.46589	0.000528484	0.0267646
Contig134267	ref|XP_011878118.1| PREDICTED: uncharacterized protein LOC105567668, partial [Vollenhovia emeryi]	11.37	-4.60519	1.30514	-3.5285	0.000417918	0.022222
Contig114594	#N/A	3.64384	-4.30782	1.18386	-3.63878	0.000273931	0.0159021
Contig98236	#N/A	3.95124	-4.07392	1.19577	-3.40695	0.000656922	0.0319742
Contig91855	ref|XP_011643103.1| PREDICTED: WD repeat domain phosphoinositide-interacting protein 2 isoform X2 [Pogonomyrmex barbatus]	308.348	-4.03721	1.03182	-3.91272	9.12612e-05	0.00617278
Contig7827	ref|XP_011170663.1| PREDICTED: uncharacterized protein LOC105203550 [Solenopsis invicta]	5.02581	-3.62053	1.06915	-3.38637	0.000708229	0.0340261
Contig69592	#N/A	5.00982	-3.57333	1.08519	-3.29283	0.000991856	0.0451357
Contig96846	#N/A	3.54377	-3.53404	0.989986	-3.56978	0.000357276	0.0196734
Contig74042	ref|XP_011695133.1| PREDICTED: abscission/NoCut checkpoint regulator isoform X1 [Wasmannia auropunctata]	5.72733	-3.53029	0.932169	-3.78717	0.00015237	0.00964148
Contig35529	ref|XP_012530064.1| PREDICTED: uncharacterized protein LOC105833136 [Monomorium pharaonis]	2.61123	-3.32973	1.01541	-3.27921	0.00104099	0.0470382
Contig120985	ref|XP_012059100.1| PREDICTED: uncharacterized protein LOC105622290 [Atta cephalotes]	17.4409	-2.37438	0.696533	-3.40886	0.000652359	0.031785
Contig65629	#N/A	5.27954	-1.99026	0.568884	-3.49854	0.000467815	0.0242807
Contig108211	ref|XP_011876021.1| PREDICTED: putative aldehyde dehydrogenase family 7 member A1 homolog [Vollenhovia emeryi]	47.0857	-1.4276	0.429731	-3.32207	0.000893535	0.0413947
Contig110401	ref|XP_011879508.1| PREDICTED: uncharacterized protein LOC105568414, partial [Vollenhovia emeryi]	53.1235	-1.28368	0.392738	-3.26855	0.00108102	0.0486137
Contig112521	ref|XP_011875710.1| PREDICTED: slit homolog 3 protein-like [Vollenhovia emeryi]	62.118	-1.26948	0.384212	-3.30411	0.000952775	0.0437376
Contig142392	ref|XP_011878930.1| PREDICTED: feline leukemia virus subgroup C receptor-related protein 2-like [Vollenhovia emeryi]	31.3214	-1.21643	0.363585	-3.34565	0.000820894	0.0385861
Contig150076	ref|XP_011867750.1| PREDICTED: rab3 GTPase-activating protein non-catalytic subunit isoform X4 [Vollenhovia emeryi]	73.2096	-1.07138	0.310118	-3.45474	0.000550815	0.0276478
Contig111572	ref|XP_011635140.1| PREDICTED: DNA replication licensing factor Mcm3 [Pogonomyrmex barbatus]	28.8058	-0.949781	0.280782	-3.38263	0.000717955	0.0344348
Contig71370	ref|XP_011706401.1| PREDICTED: glucose dehydrogenase [FAD, quinone]-like isoform X1 [Wasmannia auropunctata]	119.398	-0.814788	0.246001	-3.31213	0.000925887	0.0426519

## Sheet: c)
Contig	Annotation	baseMean	log2FoldChange	lfcSE	stat	pvalue	padj
Contig6198	ref|XP_014482082.1| PREDICTED: ras-like protein 3 [Dinoponera quadriceps]	1303.44150719618	0.324107598531465	0.0955788057256441	3.39099862224482	0.000696384511971938	0.0287048680355455
Contig79463	ref|XP_011169331.1| PREDICTED: sorting nexin lst-4 [Solenopsis invicta]	290.076168277354	0.373942757224837	0.11015635737411	3.39465434532174	0.000687152953240929	0.0283724093828487
Contig8302	ref|XP_012062935.1| PREDICTED: putative methyltransferase C9orf114 homolog [Atta cephalotes]	73.1554304874339	0.507037538596767	0.15619405832657	3.24620247421098	0.00116955626375805	0.0463215080303743
Contig18778	ref|XP_011162209.1| PREDICTED: cadherin-87A [Solenopsis invicta]	191.409238384605	0.611484148279163	0.176243494589074	3.4695416685018	0.000521347191235814	0.0219830245667677
Contig18734	ref|XP_011883349.1| PREDICTED: uncharacterized protein LOC105570618 isoform X2 [Vollenhovia emeryi]	306.334575981223	0.642826167844644	0.197386470362453	3.25668809348609	0.00112720220373256	0.0447441134017417
Contig127721	ref|XP_011695057.1| PREDICTED: mitotic spindle assembly checkpoint protein MAD1 [Wasmannia auropunctata]	116.894627849284	0.727474341686591	0.218976682446083	3.32215436621071	0.000893252613592654	0.0361506612532996
Contig116579	#N/A	69.7215256872914	0.768938056100715	0.227458900654389	3.38055821903875	0.00072338748290047	0.0297345430960683
Contig42050	#N/A	55.2029616709813	0.784625397591169	0.222374317418396	3.52839935249763	0.000418080900315697	0.0181172498636216
Contig10155	ref|XP_011166429.1| PREDICTED: fasciclin-1 isoform X2 [Solenopsis invicta]	77.3360163538288	0.852262848938441	0.230796081711618	3.69270935025383	0.000221877556361803	0.0104845442006082
Contig40854	ref|XP_003694229.1| PREDICTED: putative protein kinase C delta type homolog isoform X1 [Apis florea]	23.5184838282591	0.869527431862999	0.266689035085752	3.26045437744903	0.00111233860490885	0.0441899058204195
Contig39079	#N/A	35.4094027187284	0.873746452855457	0.229911692454174	3.80035675231963	0.000144487923500483	0.00710785805734137
Contig112555	ref|XP_011706856.1| PREDICTED: juvenile hormone-binding protein-like [Wasmannia auropunctata]	157.536706286303	0.882767239480507	0.269575305044997	3.27465915074512	0.00105789530815192	0.0421752186995526
Contig62990	ref|XP_011636307.1| PREDICTED: ecdysteroid-regulated 16 kDa protein [Pogonomyrmex barbatus]	577.440024960208	0.889021958556561	0.231008174981785	3.84844371255113	0.000118870602033196	0.00595934167560007
Contig114164	ref|XP_011861228.1| PREDICTED: transcription elongation regulator 1 [Vollenhovia emeryi]	34.5417766812335	0.903449561879271	0.245083827954333	3.68628795061751	0.000227548874437615	0.0106963252489878
Contig9296	ref|XP_011168121.1| PREDICTED: UPF0505 protein C16orf62 homolog [Solenopsis invicta]	120.553530648366	0.942883893704445	0.274511887860762	3.43476525207059	0.000593067337376894	0.0247375050854227
Contig127684	ref|XP_012061303.1| PREDICTED: serine/threonine-protein phosphatase 2A 55 kDa regulatory subunit B beta isoform [Atta cephalotes]	77.0403807332728	0.953556084393652	0.285468201601784	3.34032329710691	0.000836809134513772	0.0340256084874632
Contig1196	#N/A	61.134467858922	0.987443469455475	0.298044190426927	3.31307739312426	0.000922754419901939	0.0372216443966482
Contig37011	#N/A	174.469852599681	1.05643798974614	0.319407469852589	3.30749305967609	0.000941350444078048	0.0378885820851677
Contig13260	ref|XP_011871575.1| PREDICTED: major facilitator superfamily domain-containing protein 6 [Vollenhovia emeryi]	71.4109001680781	1.05804100107363	0.282937270878131	3.7394896677623	0.000184394226719254	0.0088575514331579
Contig64055	ref|XP_011156631.1| PREDICTED: DNA repair protein complementing XP-G cells, partial [Solenopsis invicta]	29.850606156713	1.11953914443719	0.311908987032104	3.58931352087637	0.000331549902775608	0.0147501574482405
Contig140934	#N/A	35.4783987325903	1.19616765978152	0.344128945612062	3.47592864545015	0.00050908771687577	0.021534044173689
Contig30256	ref|XP_011639327.1| PREDICTED: LOW QUALITY PROTEIN: zinc finger protein on ecdysone puffs [Pogonomyrmex barbatus]	49.8344320741687	1.29450309419859	0.382084539196791	3.38800176767127	0.000704038105874424	0.0289797146968585
Contig118254	#N/A	9.67652567429803	1.3948528256493	0.423110113781966	3.29666623466269	0.000978396954109097	0.0392507009510088
Contig16587	ref|XP_011166428.1| PREDICTED: fasciclin-1 isoform X1 [Solenopsis invicta]	23.0012805145851	1.40246041819496	0.340167595211068	4.12285131781808	3.74211254676249e-05	0.00204556758366909
Contig55949	ref|XP_011880332.1| PREDICTED: twitchin isoform X27 [Vollenhovia emeryi]	31.5700643676237	1.56220281176122	0.384440390844126	4.06357617192889	4.83265416687081e-05	0.00256722745207207
Contig38937	#N/A	8.40832644242709	1.64318779510515	0.492753348734323	3.33470650037349	0.000853894733252677	0.0346723720554727
Contig19751	ref|XP_011051281.1| PREDICTED: A disintegrin and metalloproteinase with thrombospondin motifs 14 [Acromyrmex echinatior]	32.7652698561689	1.68761620811877	0.499564535394615	3.37817456714716	0.000729687431683846	0.0299683586429753
Contig2803	#N/A	15.4663662188777	1.74385469770134	0.487348129396318	3.57825257247107	0.000345899108353769	0.0153236015481979
Contig6086	#N/A	209.854178632015	1.79429839571628	0.399730410079816	4.48877130803735	7.16351490939751e-06	0.000488614875421039
Contig26114	#N/A	13.6242564674459	1.86088286235662	0.474315386240261	3.92330275664725	8.73432772429611e-05	0.00447649523080295
Contig91914	ref|XP_011703569.1| PREDICTED: importin-4-like isoform X1 [Wasmannia auropunctata]	25.5689552484724	11.1546551694214	3.34929868138407	3.33044503657458	0.000867072797699768	0.0351395176547805
Contig123110	ref|XP_011861118.1| PREDICTED: uncharacterized protein LOC105558172 [Vollenhovia emeryi]	3.49751348145097	11.5065143555063	3.56784117289907	3.22506350420208	0.00125944728501759	0.0496316773256662
Contig58804	ref|XP_011704437.1| PREDICTED: WD repeat-containing protein 60 [Wasmannia auropunctata]	1.7717594773592	13.4937598015312	4.18665501052761	3.22304077302771	0.00126837497870943	0.0499700986653711
Contig103375	ref|XP_011863786.1| PREDICTED: saccharopine dehydrogenase-like oxidoreductase [Vollenhovia emeryi]	2.31240046271096	13.5239759315353	4.18600543503662	3.23075928624946	0.00123461867593196	0.0487634509116694
Contig141556	ref|XP_012233460.1| PREDICTED: LOW QUALITY PROTEIN: protein unc-45 homolog B [Linepithema humile]	0.502422295956652	13.5651376013192	4.20604967956834	3.22514916245863	0.00125907050024953	0.0496301348435714
Contig59823	ref|XP_011704430.1| PREDICTED: cytochrome P450 6B7-like isoform X2 [Wasmannia auropunctata]	0.405014320994186	13.6369688627784	4.20340405968352	3.24426790028964	0.00117752939113119	0.0466159561546926
Contig122292	ref|XP_011706916.1| PREDICTED: putative odorant receptor 71a [Wasmannia auropunctata]	0.327834029823103	13.6566769957459	4.20129479338858	3.25058765627132	0.00115166759514965	0.045665934667129
Contig32779	#N/A	0.411209076122003	13.6910446672238	4.19851497189568	3.26092553173441	0.00111049200722395	0.044128472598499
Contig117482	#N/A	0.232100550082767	13.70129726002	4.20508890122954	3.25826577792774	0.00112095368046514	0.0445080987281393
Contig666	#N/A	0.604988976539729	13.7343738518362	4.19466766419182	3.27424600739671	0.00105944333867624	0.0422254816572724
Contig59334	#N/A	0.483492216221378	13.7384782448219	4.20330128503212	3.26849714383891	0.00108120268729215	0.0430110914763392
Contig11275	#N/A	0.804846437995352	13.7402706521218	3.18197936192496	4.3181520334593	1.57341037938627e-05	0.000934446835014094
Contig131248	ref|XP_011167488.1| PREDICTED: ER membrane protein complex subunit 1-like [Solenopsis invicta]	0.435946164315677	13.7459858214905	4.20284255962802	3.2706401980252	0.00107304338929839	0.0427096257224399
Contig78958	#N/A	17.9923488060842	13.7758234909906	4.16640768284733	3.30640315101766	0.000945020127603567	0.0380258714909522
Contig127550	ref|XP_011640611.1| PREDICTED: protein unc-45 homolog B isoform X1 [Pogonomyrmex barbatus]	0.383080624133832	13.7978877214662	4.20297752648409	3.28288401128058	0.00102750933144971	0.0410752234511268
Contig58399	#N/A	0.299238433128809	13.8295695892644	4.20124803525521	3.29177650860222	0.000995566939085559	0.0398959608441075
Contig103436	#N/A	0.464698588223625	13.8335454325146	4.20428525572018	3.29034415866364	0.00100064912829824	0.0400668524567033
Contig109000	#N/A	0.198461104566883	13.8661654000528	4.20435046966735	3.29805174428047	0.000973581912964488	0.0390681969387524
Contig102786	#N/A	0.129030615103234	13.8728532672974	4.20604967962301	3.29830941714908	0.000972688849889164	0.0390430185814332
Contig144214	#N/A	0.375565679763226	13.8837443506984	4.20604967956939	3.3008988025362	0.000963756374166692	0.0387056146007547
Contig111496	ref|XP_011169952.1| PREDICTED: fatty acid synthase-like [Solenopsis invicta]	0.53943750493559	13.8910310275843	4.20336360850319	3.30474170720883	0.000950639654705056	0.0382257784866306
Contig106894	#N/A	0.481612763947266	13.9133790134484	4.20322105823631	3.31017065737831	0.000932391048409752	0.0375691228634181
Contig86616	ref|XP_011702698.1| PREDICTED: uncharacterized protein LOC105458829 [Wasmannia auropunctata]	0.240924311112279	13.913733284283	4.20604967960424	3.30802875480829	0.000939551620519704	0.0378265386743882
Contig10547	#N/A	0.689834511101527	13.9244403025796	4.19295629441312	3.32091234080668	0.000897237130588711	0.0362919333586226
Contig61893	ref|XP_011644058.1| PREDICTED: uncharacterized protein LOC105431518 [Pogonomyrmex barbatus]	0.305844027462766	13.9403941068931	4.20604967960472	3.31436743947427	0.000918507199948688	0.0370706681275282
Contig137766	ref|XP_968724.1| PREDICTED: pathogenesis-related protein 5 [Tribolium castaneum]	0.289824839082448	13.9508118018285	4.20532308664337	3.31741735757189	0.000908537890307043	0.036705965832285
Contig25443	#N/A	0.738180821207332	13.9532853489387	4.20604967954803	3.31743236814029	0.000908489073992113	0.036705965832285
Contig15820	#N/A	0.617864745811584	13.9994472219735	4.20215494065882	3.3314923937047	0.000863816606823496	0.0350365350543559
Contig69910	ref|XP_012529381.1| PREDICTED: transcription factor collier isoform X4 [Monomorium pharaonis]	0.751351168880833	14.0072047815044	4.20124073153083	3.33406383413801	0.000855870135634523	0.0347429857047552
Contig84511	#N/A	0.250751104270126	14.0320357580273	4.20537449400934	3.33669112656109	0.000847821124937649	0.0344543066504244
Contig137181	ref|XP_011867345.1| PREDICTED: 5-hydroxytryptamine receptor 2A isoform X2 [Vollenhovia emeryi]	0.65899999638576	14.0354429949578	4.20119713243286	3.34081990264285	0.000835313881450646	0.0339836112467286
Contig104290	#N/A	0.284260529284444	14.1187699113244	4.20422808095539	3.35823119951093	0.000784429728542194	0.0320287016106714
Contig44976	#N/A	0.282044112492601	14.1190267666687	4.20203136830731	3.36004792185934	0.000779289538682206	0.0318453626051981
Contig80716	ref|XP_011688222.1| PREDICTED: F-box/LRR-repeat protein 4-like [Wasmannia auropunctata]	0.324823753929235	14.1266319796044	4.2011389858104	3.36257191854825	0.000772200086275606	0.0315732102035191
Contig16662	ref|XP_012530120.1| PREDICTED: uncharacterized protein LOC105833160 isoform X1 [Monomorium pharaonis]	0.31860948004042	14.1315056631237	4.1964684764043	3.36747571025057	0.000758597086272002	0.0310515693988086
Contig103951	ref|XP_012058254.1| PREDICTED: probable maleylacetoacetate isomerase 2 [Atta cephalotes]	0.366417384632513	14.1472723132684	4.20604967957383	3.36355330798229	0.000769459742582102	0.0314699186316481
Contig38439	ref|XP_011647898.1| PREDICTED: restin homolog isoform X4 [Pogonomyrmex barbatus]	1.09472637303698	14.1601604249379	4.20417042425955	3.36812236326786	0.0007568199850543	0.030996090722522
Contig133337	#N/A	0.307123298850754	14.1908921091624	4.20341815312262	3.37603626196941	0.000735382262906109	0.0301769510956362
Contig144516	#N/A	0.323456386950837	14.2032115813828	4.20426336225901	3.37828778969526	0.000729387037271622	0.0299643936860133
Contig62510	#N/A	0.413674244398877	14.2350774593661	4.19562899741437	3.39283513107064	0.000691732584026438	0.0285451354649203
Contig116125	ref|XP_011157574.1| PREDICTED: uncharacterized protein LOC105194390 [Solenopsis invicta]	0.695172731588372	14.2526234857207	4.19995906942516	3.39351485338912	0.000690018163830287	0.0284823841340674
Contig149141	#N/A	0.246676757878181	14.2601780655668	4.20411304727249	3.39195875686987	0.000693948849677776	0.0286195127400183
Contig135565	#N/A	0.403713793771328	14.2720798842155	4.20428465106362	3.39465118771273	0.000687160877630732	0.0283724093828487
Contig118731	#N/A	0.405535453643399	14.2755492327949	4.19343910950081	3.40425814230894	0.000663440232196835	0.027454695870105
Contig60440	#N/A	2.01167713602753	14.2773146533294	2.99620213715857	4.76513733044367	1.88725065277271e-06	0.000154716661155081
Contig53943	#N/A	0.337488530347649	14.2838876599665	4.20477084200296	3.39706685493526	0.000681123240255972	0.0281389277923624
Contig26491	ref|XP_011869035.1| PREDICTED: cell adhesion molecule 2-like [Vollenhovia emeryi]	0.798096031388381	14.2888338793405	4.19198721713933	3.40860626218499	0.00065295649052925	0.0270589440493077
Contig56323	#N/A	0.450630925165213	14.2959440104664	4.20025366305503	3.40359062982599	0.000665063459487091	0.0275141226878715
Contig29733	ref|XP_011168815.1| PREDICTED: uncharacterized protein LOC105202124 [Solenopsis invicta]	1.20764120601879	14.3019110267321	2.65017495359295	5.39659127309404	6.79188681705615e-08	8.24392603830788e-06
Contig53467	#N/A	0.263604551522574	14.3043024201992	4.19933103512851	3.40632884155594	0.000658428205883817	0.0272703189582593
Contig146251	#N/A	0.473610180939076	14.3054242970672	4.20354144787502	3.40318383307458	0.000666054499940345	0.0275473694277522
Contig99945	#N/A	0.299714372691603	14.3215026694683	4.201985459476	3.40827040159587	0.000653760759863249	0.0270846375682917
Contig89653	#N/A	0.583113069410562	14.3239701371122	4.20604967954948	3.40556370666702	0.000660276061866137	0.0273314498264442
Contig128660	ref|XP_011685218.1| PREDICTED: tachykinin-like peptides receptor 86C [Wasmannia auropunctata]	0.286969634520519	14.3350000355291	4.1947068758499	3.41740208786928	0.000632218304047733	0.0262439334967456
Contig130103	#N/A	0.289053688555411	14.3903523918823	4.20250052608748	3.42423571455914	0.000616531194939981	0.0256072111738423
Contig37236	ref|XP_016843801.1| PREDICTED: uncharacterized protein LOC107981763 [Nasonia vitripennis]	0.26351824284832	14.406406340604	4.19974983062539	3.43030107068513	0.000602911875388853	0.0250982771349214
Contig120166	#N/A	0.258932123556391	14.4528951577906	4.19460616947357	3.44559049738023	0.000569813135087844	0.0238895700874393
Contig140010	ref|XP_012215612.1| PREDICTED: uncharacterized protein LOC105668019, partial [Linepithema humile]	0.365590630054048	14.470692259185	4.20019535239709	3.44524267208821	0.000570546920461406	0.023913513498324
Contig127136	ref|XP_011873599.1| PREDICTED: uncharacterized protein LOC105565207 [Vollenhovia emeryi]	0.247033433495563	14.47221854638	4.2060496795838	3.44081017792736	0.000579975257866475	0.024260262707397
Contig141887	#N/A	0.209909536754872	14.4795945535118	4.19925337861706	3.44813547742631	0.00056447082881874	0.0236791002077816
Contig147633	#N/A	0.282431913323341	14.5014208548697	4.20411392520539	3.44934060133998	0.000561957394812715	0.0235803932239569
Contig102179	#N/A	0.301525895838066	14.5182344138819	4.19824202213783	3.45816995240519	0.000543858186683501	0.0228535491311057
Contig49955	#N/A	0.419189422254553	14.5217987950456	4.20328573205193	3.45486833890697	0.000550561606954283	0.0231197852319469
Contig143075	ref|XP_011866572.1| PREDICTED: coiled-coil domain-containing protein 103-like [Vollenhovia emeryi]	0.647335796124014	14.5311332398678	4.20604967957908	3.45481731003282	0.000550665814661174	0.0231197852319469
Contig133634	#N/A	0.250463595614296	14.5334251402851	4.19459463491369	3.46479848596481	0.000530628925555219	0.0223167799048245
Contig120616	#N/A	0.440441434735347	14.5478342310817	4.19719764758835	3.46608271817761	0.000528100779019605	0.0222236076843905
Contig43177	#N/A	0.361149072946156	14.5524147208338	4.18797393068105	3.47481024516963	0.000511214833694043	0.0216177987355257
Contig141989	ref|XP_011175427.1| PREDICTED: heparan sulfate glucosamine 3-O-sulfotransferase 5 [Solenopsis invicta]	0.271352431232374	14.5587166081191	4.20134877626995	3.46524827701753	0.000529742183929683	0.0222858625116841
Contig141907	ref|XP_011633902.1| PREDICTED: zinc finger protein 583, partial [Pogonomyrmex barbatus]	0.13089679665628	14.5671897542482	4.20278832988276	3.46607742547305	0.000528111175192708	0.0222236076843905
Contig59887	#N/A	0.13089679665628	14.5671897542482	4.20278832988276	3.46607742547305	0.000528111175192708	0.0222236076843905
Contig110479	ref|XP_011629899.1| PREDICTED: uncharacterized protein LOC105422287 [Pogonomyrmex barbatus]	1.00826619838872	14.5701413356673	4.19888575223755	3.4700018517777	0.000520454776632944	0.0219642973348482
Contig26482	ref|XP_011687036.1| PREDICTED: uncharacterized protein LOC105449477 [Wasmannia auropunctata]	0.437336600796734	14.5888038850866	4.20604967957127	3.46852866620768	0.000523316692591763	0.0220577280930093
Contig74074	ref|XP_011860502.1| PREDICTED: tubulin polyglutamylase TTLL5 [Vollenhovia emeryi]	0.426756363311718	14.6338808369515	4.19288764914541	3.49016765091098	0.000482717616064485	0.0205784983716121
Contig46213	#N/A	0.324951393322016	14.6364629882596	4.19827349190984	3.48630526726387	0.000489741796811874	0.0208115486306382
Contig129165	ref|XP_012533032.1| PREDICTED: regulating synaptic membrane exocytosis protein 2 isoform X2 [Monomorium pharaonis]	0.831768494698488	14.6392094616515	4.18742141130015	3.49599622864473	0.000472295375095273	0.0201751517539245
Contig80659	#N/A	0.236620735537532	14.6397630704434	4.20403612536282	3.48231143450985	0.000497105186249529	0.0211061500077465
Contig114729	#N/A	0.164431100372534	14.6452906890598	4.20006725266186	3.48691813917457	0.000488620894275626	0.0207819401763814
Contig127199	#N/A	0.164431100372534	14.6452906890598	4.20006725266186	3.48691813917457	0.000488620894275626	0.0207819401763814
Contig57555	#N/A	0.216884791945619	14.6542079674762	4.19917394358964	3.48978350607431	0.000483411995734686	0.0206021250371243
Contig149286	#N/A	0.818165573871301	14.657303720033	4.20419906434845	3.48634864707686	0.000489662379188896	0.0208115486306382
Contig131009	#N/A	0.556068554359802	14.674618392675	4.20604967954033	3.48893130389244	0.000484955762277035	0.0206511879663778
Contig81240	#N/A	0.219643344664567	14.6856248408862	4.20604967960755	3.49154811748597	0.000480229957405394	0.0204812476564065
Contig131208	#N/A	0.281557700184268	14.6895143622705	4.20421654427389	3.49399566068439	0.000475848752704474	0.0203092358188242
Contig140238	ref|XP_011859754.1| PREDICTED: probable DNA-directed RNA polymerase III subunit RPC6 [Vollenhovia emeryi]	1.91513742999055	14.6911802439974	4.20401032983503	3.49456330773903	0.000474837981019267	0.0202719822335237
Contig40197	ref|XP_004207219.1| PREDICTED: zinc finger MYM-type protein 1-like [Hydra vulgaris]	0.30179780525365	14.6947724789853	4.19478381370805	3.5031060315825	0.00045986636721714	0.0196728048071151
Contig130732	#N/A	0.443040873557565	14.7347699855419	4.18610532049134	3.51992337923606	0.000431671480638667	0.0186183658858796
Contig137253	ref|XP_011876243.1| PREDICTED: WD repeat-containing protein CG11141 isoform X1 [Vollenhovia emeryi]	2.63707772518639	14.7368823768836	4.1844693077809	3.52180438974204	0.000428620285094418	0.0185087557155672
Contig113987	ref|XP_011697513.1| PREDICTED: N-acetyl-D-glucosamine kinase isoform X2 [Wasmannia auropunctata]	1.18367480800406	14.739214032347	4.2029694179116	3.50685731129367	0.000453432219916849	0.0194484978131245
Contig99702	#N/A	1.77311514848514	14.7489287810575	4.20086921247642	3.51092310545012	0.000446553548267033	0.0191926625905764
Contig107085	#N/A	0.16538847921927	14.7588169292278	4.19662015401635	3.51683411592612	0.000436726625943879	0.018814316162805
Contig4487	ref|XP_011865488.1| PREDICTED: uncharacterized protein LOC105560735 [Vollenhovia emeryi]	0.16538847921927	14.7588169292278	4.19662015401635	3.51683411592612	0.000436726625943879	0.018814316162805
Contig11610	ref|XP_011858947.1| PREDICTED: uncharacterized protein LOC105556465 [Vollenhovia emeryi]	0.259880250644774	14.7725433450067	4.20258977032211	3.51510476928478	0.000439580531579773	0.0189209365681298
Contig149235	#N/A	0.228442575234044	14.7810576193687	4.20501715889097	3.51510042904724	0.000439587716036214	0.0189209365681298
Contig141931	#N/A	0.300019799057715	14.8032394066586	4.20243189228309	3.52254118236674	0.000427430628353005	0.018478831782826
Contig103167	#N/A	0.287100134350719	14.8032403812873	4.2042784966322	3.52099424268523	0.000429931951205736	0.0185596762137243
Contig147125	#N/A	1.02949397328655	14.8079336372688	4.20464854857509	3.52180056577786	0.00042862646748616	0.0185087557155672
Contig48856	#N/A	0.257634170446349	14.8091256057576	4.19665528425221	3.52879247941291	0.000417460352953761	0.0180956936834778
Contig38872	ref|XP_017032609.1| PREDICTED: transketolase-like [Drosophila kikkawai]	0.568062032076648	14.8128610212661	4.20215809792078	3.52506037994989	0.000423386276093038	0.0183147583057433
Contig149433	ref|XP_011881115.1| PREDICTED: sarcoplasmic calcium-binding protein 1 [Vollenhovia emeryi]	0.34576878141254	14.8200706460734	4.19456312762293	3.53316190391251	0.000410620922974177	0.0178465906173786
Contig80525	#N/A	0.173411218592088	14.8286126275355	4.20048327227565	3.53021585049711	0.00041522076224608	0.0180145513112607
Contig100109	ref|XP_011865116.1| PREDICTED: chromatin assembly factor 1 subunit B [Vollenhovia emeryi]	2.98274169077905	14.849722144454	4.17660931593659	3.55544917447563	0.000377333886771725	0.016541696396235
Contig32223	#N/A	0.332452135363337	14.850628434942	4.20604967956896	3.53077818055253	0.000414339065251161	0.0179816059053051
Contig110219	ref|XP_011866791.1| PREDICTED: protein virilizer isoform X3 [Vollenhovia emeryi]	1.02063238703453	14.8508762742961	4.18558957633947	3.54809663093723	0.000388025835745325	0.016964877333791
Contig97931	ref|XP_011871868.1| PREDICTED: dystrotelin-like [Vollenhovia emeryi]	0.23908077253118	14.875425669202	4.20171477819751	3.54032257172473	0.000399638249065015	0.0173898242244128
Contig130552	#N/A	0.612026170150119	14.8887933452427	4.20219691768069	3.54309748850615	0.000395456484009973	0.0172435919859466
Contig146314	ref|XP_011688398.1| PREDICTED: uncharacterized protein LOC105450312 [Wasmannia auropunctata]	0.420746441305279	14.8918476433285	4.20381612822164	3.54245932483928	0.000396414552707334	0.0172802417267055
Contig126107	#N/A	0.638548921240791	14.895496463132	4.18891861109724	3.55592883176843	0.000376646034722515	0.0165164679725127
Contig146878	#N/A	0.29312785940827	14.8975709261505	4.20604967957473	3.54193888828645	0.0003971974838764	0.0172989801940717
Contig99920	#N/A	0.285695513193213	14.9006321599776	4.19476565586869	3.55219656648301	0.00038202935430708	0.0167375543337102
Contig53721	#N/A	0.414401176558531	14.9067057577222	4.20604967955957	3.54411071989125	0.000393939773256737	0.0171825540863524
Contig46832	#N/A	0.51612877338508	14.9220938712538	4.20150123674577	3.55161001518864	0.000382881890549904	0.0167699073575478
Contig108846	ref|XP_011862971.1| PREDICTED: dual specificity protein phosphatase 10 isoform X1 [Vollenhovia emeryi]	0.424996483618127	14.9347383788433	4.19778540279368	3.55776604704566	0.000374022205725131	0.0164210047848079
Contig107172	#N/A	0.353747257170528	14.9478000674266	4.20604967960142	3.5538810061899	0.000379590920423357	0.0166356796043617
Contig146360	#N/A	0.202037515089085	14.9523562930651	4.19694529940731	3.56267600037023	0.000367093637264191	0.0161554172878633
Contig111960	#N/A	0.235767662422754	14.9562958880145	4.19577563782978	3.56460811516376	0.000364400225943464	0.0160513003330626
Contig93552	ref|XP_011865165.1| PREDICTED: axonemal 84 kDa protein-like [Vollenhovia emeryi]	0.736659373745434	14.9613811176383	4.20177598445641	3.56072793337503	0.000369828121722214	0.0162562905538123
Contig124855	ref|XP_011157661.1| PREDICTED: ras-related and estrogen-regulated growth inhibitor [Solenopsis invicta]	2.03036218914004	14.9645876813769	4.17691865849411	3.58268592349654	0.000340079404795832	0.0150930772074092
Contig111642	#N/A	0.326564905261081	14.9675932978563	4.20198653778379	3.56202790353311	0.000368001259762451	0.0161905133709915
Contig150255	#N/A	0.175911002091371	14.9681473828821	4.19701790714172	3.56637682136453	0.000361950820052381	0.0159577537610976
Contig20060	#N/A	0.163412068847146	14.9717268100748	4.19963733403371	3.56500469427312	0.000363849676266468	0.0160318536913693
Contig130050	ref|XP_011871373.1| PREDICTED: uncharacterized protein LOC105563955, partial [Vollenhovia emeryi]	0.393902068562685	14.9823901202094	4.1998620236529	3.56735293584197	0.000360605641908012	0.0159032173129489
Contig136609	ref|XP_011862052.1| PREDICTED: secretin receptor isoform X2 [Vollenhovia emeryi]	3.22504690534648	14.9941990529194	4.19979533528202	3.57022136934977	0.000356679673125844	0.0157489772162114
Contig24861	#N/A	0.179718487624319	14.9974206173598	4.19749440476082	3.57294594612197	0.000352987645668564	0.0156094025381535
Contig31228	ref|XP_011880617.1| PREDICTED: xyloside xylosyltransferase 1 [Vollenhovia emeryi]	5.00779976571749	15.0124192082413	4.20049581831795	3.57396361228921	0.000351617815402156	0.015553506676486
Contig149764	ref|XP_012543005.1| PREDICTED: sorting nexin-2 isoform X1 [Monomorium pharaonis]	0.342753115208415	15.0160233955909	4.19935045355045	3.57579667657773	0.000349162953291029	0.0154588742482676
Contig141541	ref|XP_012214839.1| PREDICTED: putative golgin subfamily A member 6-like protein 6 [Linepithema humile]	1.30241693482088	15.05189231491	4.19964084234072	3.58409037343314	0.000338254960746477	0.0150211772447507
Contig141983	#N/A	0.245006153758023	15.0571587528533	4.19366715288176	3.59045155562869	0.000330105582054425	0.0146903480188253
Contig112328	ref|XP_015185985.1| PREDICTED: uncharacterized protein LOC107071468 [Polistes dominula]	1.15984205322035	15.0580114468202	4.07735960328467	3.6930790786002	0.000221555090042078	0.0104816165707387
Contig36685	#N/A	0.214993123045229	15.0666463532521	4.19452226347951	3.59198149558843	0.000328173157399423	0.0146220589288091
Contig70385	#N/A	0.521947556082352	15.0827481398493	4.20418071262101	3.58755942497207	0.000333787675068272	0.0148407290859907
Contig135290	#N/A	0.152392244711727	15.0967715699783	4.19743582770292	3.59666524746851	0.000322322850951405	0.0143788272720325
Contig130655	#N/A	0.44096940606181	15.1344156581278	4.19990706037709	3.60351203980428	0.000313946197895876	0.0140349609576383
Contig138366	#N/A	0.325012344047322	15.1360739843331	4.18999133331533	3.61243563059035	0.000303334418780831	0.0136060806275845
Contig101687	#N/A	0.290777573866284	15.1611124567442	4.19402819652301	3.61492859521385	0.00030043041483267	0.013488169418526
Contig78721	ref|XP_011065681.1| PREDICTED: uncharacterized protein LOC105152859 isoform X2 [Acromyrmex echinatior]	0.412695340591343	15.16418676055	4.20004482720181	3.61048212208078	0.000305628368786723	0.0137047937547164
Contig136106	ref|XP_011877563.1| PREDICTED: UPF0160 protein MYG1, mitochondrial isoform X2 [Vollenhovia emeryi]	0.265799633830953	15.1656737183901	4.18874754038919	3.62057478331124	0.000293949271176801	0.0132295172597299
Contig144333	#N/A	0.304240028590821	15.1793299630311	4.19012260898673	3.62264577424903	0.000291605027573739	0.0131360781498817
Contig122556	#N/A	0.399571515026813	15.1820719121916	4.18589409074334	3.6269603537665	0.000286777306211282	0.0129742678485677
Contig24438	ref|XP_012061678.1| PREDICTED: high affinity cationic amino acid transporter 1 [Atta cephalotes]	0.962663580976187	15.1918094684739	4.17934462403808	3.63497410122538	0.00027800856270876	0.0126633029540008
Contig138381	#N/A	0.300016609173729	15.1935276564254	4.20367625387554	3.61434295574448	0.00030111026509014	0.0135145642337709
Contig105707	ref|XP_017101086.1| PREDICTED: protein unc-13 homolog A-like, partial [Drosophila bipectinata]	0.298818161472602	15.197012528874	4.1880440421525	3.62866588219147	0.000284889668082715	0.0129127142496079
Contig38788	ref|XP_011879068.1| PREDICTED: aminopeptidase N-like [Vollenhovia emeryi]	0.498929376586853	15.2010092877731	4.19821134977076	3.62082992524974	0.000293659514593692	0.0132230976359007
Contig131463	#N/A	0.395415479332556	15.2039937565807	4.18636875475802	3.63178559922621	0.000281466927040108	0.0127891263077667
Contig107143	#N/A	0.414320983657192	15.2061249855275	4.18712807733645	3.6316359816728	0.000281630193681208	0.0127925902871449
Contig116005	ref|XP_011694911.1| PREDICTED: NACHT and WD repeat domain-containing protein 1-like [Wasmannia auropunctata]	0.236000225915235	15.2077605656713	4.19437731256749	3.62574929062884	0.000288124789498125	0.0130187609246578
Contig12702	#N/A	0.65477714397138	15.2124866666227	4.20305276167233	3.61938988854613	0.000295298431671221	0.0132821041834005
Contig129535	#N/A	0.262321473348922	15.2161906737764	4.19252627200329	3.62936084035694	0.000284123848329242	0.0128899273042949
Contig109638	#N/A	0.315323292781509	15.2162789433626	4.19268041883415	3.62924845762361	0.000284247559319651	0.0128915608591162
Contig143223	#N/A	0.191349119422123	15.2225722405217	4.1964395170024	3.62749711483879	0.00028618197197366	0.0129593000802244
Contig68120	ref|XP_003493099.2| PREDICTED: probable amino-acid permease meu22 [Bombus impatiens]	0.552483013033786	15.2277110310518	4.20114125389052	3.62466056501909	0.000289341215421957	0.0130584338303468
Contig134118	ref|XP_012215102.1| PREDICTED: succinyl-CoA ligase [GDP-forming] subunit beta, mitochondrial [Linepithema humile]	0.265305780820721	15.2320804641592	4.20247409809335	3.62455070718223	0.000289464225718253	0.0130584338303468
Contig124534	#N/A	0.259325803050436	15.2361028977436	4.19344048993568	3.63331801996726	0.000279799807245337	0.0127370002065631
Contig39724	ref|XP_012535516.1| PREDICTED: protein timeless homolog [Monomorium pharaonis]	0.277825199292594	15.243531883966	4.19138431035587	3.63687286949637	0.000275968049469959	0.0125937732355136
Contig101297	ref|XP_011876124.1| PREDICTED: lachesin-like isoform X3 [Vollenhovia emeryi]	1.04181619306154	15.247061653903	4.17844690760556	3.64897819478104	0.000263285447967275	0.0120862985623703
Contig143423	ref|XP_011692311.1| PREDICTED: uncharacterized protein LOC105452679 isoform X2 [Wasmannia auropunctata]	0.40874383706512	15.2471644477688	4.18705668037276	3.6414994139538	0.00027105474260521	0.0124003537552256
Contig137499	ref|XP_011870308.1| PREDICTED: putative pre-mRNA-splicing factor ATP-dependent RNA helicase DHX16 [Vollenhovia emeryi]	3.15578206256602	15.250909280364	3.23375645327015	4.71615890087872	2.4033875885954e-06	0.000188815575439678
Contig143302	#N/A	0.154924448177496	15.2512844195788	4.19860464499382	3.63246499947634	0.000280726662588329	0.0127712819974802
Contig84985	#N/A	0.781382537833751	15.2617807501196	4.20211755882164	3.63192617447841	0.000281313608411905	0.0127861123378064
Contig19702	ref|XP_011861774.1| PREDICTED: uncharacterized protein LOC105558604 [Vollenhovia emeryi]	0.396608956733944	15.2674755480882	4.20416247373339	3.63151415852166	0.000281763195872137	0.0127946778378886
Contig146798	#N/A	0.60634912212562	15.2678311764208	4.17961476985118	3.65292784554027	0.000259267102983662	0.0119466054757268
Contig65521	#N/A	0.686063098797772	15.2804382224279	3.8192154869836	4.00093638981768	6.30923179790989e-05	0.00329096515959821
Contig8093	ref|XP_011703950.1| PREDICTED: retinol dehydrogenase 12-like [Wasmannia auropunctata]	1.34482231790523	15.2851006720621	4.19940306795392	3.63982700034303	0.000272821275694966	0.0124656510147352
Contig58568	ref|XP_012530732.1| PREDICTED: thyroid receptor-interacting protein 11 [Monomorium pharaonis]	0.383934634457499	15.2946915563658	4.20052302436653	3.64113979798322	0.000271433689649185	0.0124108540876778
Contig66507	#N/A	1.87307118312331	15.3026099965581	4.20271902074925	3.64112136000708	0.00027145313213065	0.0124108540876778
Contig148755	ref|XP_011870307.1| PREDICTED: 5-hydroxytryptamine receptor 2A-like isoform X2 [Vollenhovia emeryi]	0.564144001269379	15.3059692553764	4.20604967955933	3.6390367260189	0.000273659773725573	0.012500077731486
[truncated: 1,074 more rows]

## Sheet: d)
Contig	Annotation	baseMean	log2FoldChange	lfcSE	stat	pvalue	padj
[truncated: 2,462 more rows]
