# Supplementary material for: Immune challenge reduces gut microbial diversity and triggers fertility-dependent gene expression changes in a social insect
Source: BMC Genomics. 2020 Nov 23;21:816. doi: 10.1186/s12864-020-07191-9 (PMC7682046; doi:10.1186/s12864-020-07191-9)
Supplement: Supplementary file 1 — Additional file 1. Additional methodological details, Figures S1 and S2 and Table S2. Description of additional supplementary tables (Tables S1, S3-S18) are also provided. [file 12864_2020_7191_MOESM1_ESM.zip › Table_S10.xlsx]

## Sheet: a)
Contig63205	#N/A	524.5406046704	0.2719544998	0.0805336236	3.3769062848	0.0007330602	0.023637428
Contig4929	ref|XP_012534977.1| PREDICTED: zinc finger protein 420-like [Monomorium pharaonis]	707.746608915	0.3458174889	0.1101058638	3.1407726811	0.0016850276	0.0474327696
Contig24471	ref|XP_011166234.1| PREDICTED: zinc finger and BTB domain-containing protein 11-like [Solenopsis invicta]	363.5921984439	0.3681657034	0.1121985436	3.2813768486	0.0010330162	0.03160721
Contig14928	ref|XP_011692480.1| PREDICTED: dynein heavy chain, cytoplasmic isoform X7 [Wasmannia auropunctata]	3506.2694389502	0.3988667124	0.1249074677	3.1932975647	0.0014065792	0.0409531058
Contig4055	ref|XP_011863993.1| PREDICTED: UBX domain-containing protein 6 [Vollenhovia emeryi]	427.1483730695	0.3999012468	0.1213905868	3.2943349005	0.0009865488	0.0304358922
Contig8165	#N/A	1152.7792979735	0.4005305665	0.1211800981	3.3052503907	0.0009489158	0.0293775115
Contig108729	ref|XP_011164377.1| PREDICTED: out at first protein [Solenopsis invicta]	582.0423224798	0.4377288242	0.1051429195	4.1631792829	3.13846745792728E-05	0.0018750784
Contig84944	ref|XP_011164093.1| PREDICTED: cap-specific mRNA (nucleoside-2'-O-)-methyltransferase 2 isoform X1 [Solenopsis invicta]	180.8080667322	0.4787437343	0.1416406555	3.3799881293	0.0007248896	0.0234060161
Contig87200	ref|XP_011690439.1| PREDICTED: methionine aminopeptidase 2 [Wasmannia auropunctata]	853.3741189141	0.4821023923	0.1522273646	3.1669890212	0.0015402613	0.0440912288
Contig730	#N/A	428.8068649539	0.4964485491	0.1572534791	3.1569956475	0.0015940373	0.0453732237
Contig35636	ref|XP_011162080.1| PREDICTED: eukaryotic translation initiation factor 4H-like [Solenopsis invicta]	214.8450507636	0.5087033155	0.1614644848	3.1505585638	0.0016295858	0.0462094139
Contig18329	ref|XP_011052160.1| PREDICTED: leucine-rich repeat-containing protein 16A isoform X2 [Acromyrmex echinatior]	290.1913136434	0.5188583122	0.1546830574	3.3543318896	0.0007955688	0.0253750524
Contig27399	ref|XP_011871214.1| PREDICTED: serine/threonine-protein kinase WNK1 isoform X2 [Vollenhovia emeryi]	1021.7473781384	0.5376720398	0.1623632383	3.3115380391	0.0009278462	0.0288441732
Contig112618	ref|XP_011637173.1| PREDICTED: sialin [Pogonomyrmex barbatus]	464.4693746473	0.5730854283	0.1469372343	3.9002056294	0.000096111	0.0043549791
Contig143616	#N/A	144.4946074824	0.5889726435	0.1870716739	3.1483796092	0.0016417834	0.0464887901
Contig77433	ref|XP_011164734.1| PREDICTED: maternal protein pumilio isoform X2 [Solenopsis invicta]	274.6300306206	0.5981006801	0.135058753	4.4284481146	9.49135447172754E-06	0.0008574808
Contig7364	ref|XP_012522922.1| PREDICTED: hemicentin-2 [Monomorium pharaonis]	299.0730972478	0.640452761	0.180569104	3.5468568369	0.0003898564	0.0140488491
Contig67354	#N/A	383.1313628856	0.6567603964	0.1963430516	3.3449637811	0.0008229332	0.0260771444
Contig5557	ref|XP_011866216.1| PREDICTED: folliculin-interacting protein 2 isoform X4 [Vollenhovia emeryi]	210.5675714005	0.6804423851	0.2141336119	3.1776533311	0.0014847216	0.0428748636
Contig105281	#N/A	50.5873024087	0.6947721028	0.2145225397	3.2386904599	0.0012007982	0.035802946
Contig97110	ref|XP_011867262.1| PREDICTED: CDP-diacylglycerol--inositol 3-phosphatidyltransferase isoform X2 [Vollenhovia emeryi]	500.7754394658	0.6999710477	0.2111952889	3.314330785	0.0009186276	0.0286027606
Contig8698	ref|XP_011055346.1| PREDICTED: AP-2 complex subunit alpha [Acromyrmex echinatior]	536.8798970059	0.7059285642	0.1783517658	3.9580688261	7.55581878776637E-05	0.0036165804
Contig138179	ref|XP_011701142.1| PREDICTED: RNA-binding protein with serine-rich domain 1-B-like [Wasmannia auropunctata]	221.8468995318	0.7098619312	0.208479483	3.4049486361	0.000661765	0.0217176725
Contig12559	ref|XP_011173673.1| PREDICTED: probable RNA methyltransferase bin3 [Solenopsis invicta]	257.9326249339	0.7180145282	0.1980873395	3.6247370987	0.0002892555	0.010954984
Contig31359	ref|XP_011059377.1| PREDICTED: cullin-associated NEDD8-dissociated protein 1 [Acromyrmex echinatior]	98.1642796176	0.7261941159	0.2313227782	3.1393108867	0.0016934568	0.0476085092
Contig52838	ref|XP_011158634.1| PREDICTED: arginine/serine-rich protein PNISR isoform X1 [Solenopsis invicta]	62.0711555835	0.7347030339	0.1830365703	4.013968534	5.97063094235799E-05	0.0030097476
Contig258	#N/A	102.4342430381	0.7392945428	0.1840759632	4.016247043	5.91322697695821E-05	0.0029886479
Contig125079	#N/A	171.8247380639	0.7619305525	0.2387075668	3.1918994553	0.0014134052	0.0411243527
Contig112162	ref|XP_016915817.1| PREDICTED: glucose-induced degradation protein 4 homolog [Apis cerana]	265.5629082621	0.7684289575	0.2460699078	3.1228075159	0.0017913486	0.0499176468
Contig39226	ref|XP_011693547.1| PREDICTED: importin subunit beta-1 isoform X3 [Wasmannia auropunctata]	541.7538488942	0.7691675745	0.2393634831	3.2133872907	0.0013117927	0.0385989955
Contig20382	ref|XP_011687134.1| PREDICTED: splicing factor 3A subunit 1 [Wasmannia auropunctata]	99.4782779692	0.7745363273	0.1965873219	3.9399098567	8.15122318246266E-05	0.0038213118
Contig30151	ref|XP_011868983.1| PREDICTED: aldose 1-epimerase isoform X1 [Vollenhovia emeryi]	96.640248934	0.7748586373	0.2045535137	3.7880485326	0.0001518352	0.0063267052
Contig14981	ref|XP_011648345.1| PREDICTED: SLIT-ROBO Rho GTPase-activating protein 1-like [Pogonomyrmex barbatus]	306.1979050844	0.7889351004	0.218267595	3.6145315136	0.0003008912	0.0112861763
Contig22625	#N/A	14194.8052187933	0.8052684792	0.2529263941	3.1838056362	0.0014535257	0.0421203502
Contig66191	ref|XP_011050546.1| PREDICTED: sorting nexin-8-like isoform X1 [Acromyrmex echinatior]	462.7124152139	0.8112995238	0.2561035824	3.1678569903	0.0015356704	0.0440043849
Contig29356	ref|XP_011637546.1| PREDICTED: laminin subunit gamma-1 [Pogonomyrmex barbatus]	1400.6300961482	0.8255989918	0.2612355296	3.1603625786	0.0015757292	0.0449426331
Contig103326	#N/A	116.6112157065	0.8677247479	0.2577257016	3.3668537611	0.00076031	0.0244213492
Contig73833	ref|XP_011165801.1| PREDICTED: proline-rich transmembrane protein 3-like [Solenopsis invicta]	42.6967321546	0.8791311588	0.2771104624	3.1724935656	0.0015113591	0.0434842228
Contig5026	ref|XP_012214836.1| PREDICTED: histone deacetylase complex subunit SAP30 homolog [Linepithema humile]	42.4820001881	0.9090670438	0.2745192502	3.3114874206	0.0009280141	0.0288441732
Contig31544	ref|XP_011639987.1| PREDICTED: tektin-3-like [Pogonomyrmex barbatus]	60.6528457451	0.9196644256	0.2517814185	3.6526302495	0.0002595679	0.0099609343
Contig85027	ref|XP_011870258.1| PREDICTED: calcium-dependent secretion activator isoform X2 [Vollenhovia emeryi]	610.5251212356	0.9435110159	0.2974723562	3.1717603203	0.00151518	0.0435350837
Contig67045	ref|XP_011870017.1| PREDICTED: adenosine kinase 2 isoform X1 [Vollenhovia emeryi]	182.5935645824	0.9445592673	0.2858562151	3.3043160071	0.0009520845	0.0294562472
Contig125287	#N/A	89.4645863621	0.9666332036	0.3067510274	3.1511979333	0.0016260226	0.0461256999
Contig63638	ref|XP_011059742.1| PREDICTED: UPF0764 protein C16orf89 homolog isoform X1 [Acromyrmex echinatior]	564.7209528732	0.9669872453	0.29659717	3.2602713142	0.0011130569	0.0335978624
Contig58172	ref|XP_011156811.1| PREDICTED: guanine nucleotide exchange factor MSS4 homolog [Solenopsis invicta]	49.260155394	0.977312581	0.2864264183	3.4120895234	0.0006446694	0.021257841
Contig22364	ref|XP_011871924.1| PREDICTED: leucine-rich repeat extensin-like protein 5 [Vollenhovia emeryi]	617.858986275	0.9788009466	0.3046517806	3.2128515539	0.001314242	0.0386630124
Contig25907	ref|XP_011165842.1| PREDICTED: DTW domain-containing protein 1 [Solenopsis invicta]	253.9488715042	0.9883001963	0.3096319666	3.1918545334	0.0014136251	0.0411243527
Contig120226	#N/A	138.8540620066	0.9980424493	0.2881013648	3.4642059058	0.0005317993	0.0181457723
Contig84208	ref|XP_015112286.1| PREDICTED: sorting nexin-8-like [Diachasma alloeum]	30.6601948381	1.0026482179	0.3132073702	3.2012280465	0.0013684318	0.040015586
Contig30029	ref|XP_011863793.1| PREDICTED: G-protein coupled receptor Mth2-like isoform X3 [Vollenhovia emeryi]	148.9530442187	1.003383887	0.3103515148	3.2330561933	0.0012247347	0.0363858995
Contig9999	#N/A	92.271422478	1.0129374071	0.3081193835	3.2874835579	0.0010108709	0.0310371639
Contig63818	#N/A	256.3022772023	1.0352987308	0.3235913842	3.1994014098	0.0013771328	0.0401951523
Contig75677	ref|XP_011859741.1| PREDICTED: branched-chain-amino-acid aminotransferase, cytosolic [Vollenhovia emeryi]	420.2722838375	1.0474686231	0.3051750794	3.4323530779	0.000598368	0.0199921718
Contig4220	ref|XP_011882286.1| PREDICTED: lysosomal alpha-glucosidase-like [Vollenhovia emeryi]	356.9797884725	1.0687177603	0.2589071299	4.1278035123	3.66244851881147E-05	0.0021087734
Contig2812	ref|XP_012533487.1| PREDICTED: uncharacterized protein LOC105835070 [Monomorium pharaonis]	68.3152305858	1.0700729938	0.3306220199	3.2365448441	0.0012098622	0.0360349689
Contig89963	ref|XP_011869297.1| PREDICTED: uncharacterized protein LOC105562817 [Vollenhovia emeryi]	33.529834102	1.0785924241	0.3267377681	3.3010950355	0.0009630825	0.029763927
Contig23177	ref|XP_011861782.1| PREDICTED: spastin isoform X2 [Vollenhovia emeryi]	77.7523437898	1.0827502781	0.3466403984	3.1235547934	0.0017868059	0.0498362252
Contig6380	ref|XP_011695852.1| PREDICTED: leucine-rich repeats and immunoglobulin-like domains protein 3 [Wasmannia auropunctata]	81.8476429254	1.1012683538	0.3355805377	3.2816812364	0.0010319019	0.0315867933
Contig1475	#N/A	135.0517123534	1.1111097351	0.2987334614	3.7194016698	0.0001996953	0.0079978295
Contig56283	ref|XP_011860454.1| PREDICTED: uncharacterized protein LOC105557745 [Vollenhovia emeryi]	23.0480569604	1.1138748526	0.3538347581	3.1480085746	0.0016438687	0.0465291902
Contig126525	#N/A	420.9418872087	1.1284041424	0.3567265651	3.1632187025	0.0015603506	0.0445669828
Contig4504	ref|XP_011863793.1| PREDICTED: G-protein coupled receptor Mth2-like isoform X3 [Vollenhovia emeryi]	234.2740509394	1.1293910324	0.3134999609	3.6025236786	0.0003151427	0.0117366146
Contig125781	ref|XP_011882286.1| PREDICTED: lysosomal alpha-glucosidase-like [Vollenhovia emeryi]	171.9383591833	1.1403342974	0.2463895208	4.6281769361	0.000003689	0.0004417313
Contig23139	ref|XP_011881700.1| PREDICTED: uncharacterized protein LOC105569668 [Vollenhovia emeryi]	344.3833112777	1.1541993755	0.363607435	3.1743008099	0.0015019794	0.0432847617
Contig17628	ref|XP_011063612.1| PREDICTED: transcriptional activator Myb isoform X2 [Acromyrmex echinatior]	57.9471793962	1.1651732614	0.2919662931	3.9907800622	6.58563312041755E-05	0.0032321299
Contig2804	ref|XP_011882571.1| PREDICTED: poly(U)-specific endoribonuclease homolog [Vollenhovia emeryi]	1695.7115355	1.1851235378	0.3762125266	3.1501437461	0.0016319015	0.0462460456
Contig148865	#N/A	47.2169110042	1.186215592	0.341952241	3.4689510692	0.0005224946	0.017845521
Contig13260	ref|XP_011871575.1| PREDICTED: major facilitator superfamily domain-containing protein 6 [Vollenhovia emeryi]	71.4109001681	1.1927879615	0.2811677205	4.2422649347	2.21275256313665E-05	0.0014596419
Contig7420	ref|XP_011874393.1| PREDICTED: uncharacterized protein LOC105565639 [Vollenhovia emeryi]	218.1101761575	1.194121534	0.3761265108	3.1747869388	0.0014994656	0.0432299503
Contig38405	ref|XP_011859783.1| PREDICTED: serine/arginine repetitive matrix protein 2 [Vollenhovia emeryi]	43.3236844448	1.2103626537	0.3241846714	3.7335591734	0.0001887928	0.0076260315
Contig7311	ref|XP_011868652.1| PREDICTED: UNC93-like protein [Vollenhovia emeryi]	144.3497998904	1.2391656152	0.3409854133	3.6340722118	0.0002789827	0.0106135458
Contig27448	ref|XP_011882228.1| PREDICTED: uncharacterized protein LOC105569961 [Vollenhovia emeryi]	607.5201211719	1.2467500116	0.3323395644	3.7514342115	0.0001758259	0.0071657546
Contig135604	ref|XP_011869679.1| PREDICTED: cartilage oligomeric matrix protein isoform X3 [Vollenhovia emeryi]	146.1081489501	1.2557545578	0.4002695011	3.137272648	0.0017052747	0.0478740709
Contig14554	ref|XP_011865054.1| PREDICTED: protein singed [Vollenhovia emeryi]	67.9945705493	1.258134154	0.3930275279	3.201134945	0.0013688741	0.0400202359
Contig59996	ref|XP_011866219.1| PREDICTED: folliculin-interacting protein 2 isoform X7 [Vollenhovia emeryi]	75.6784773985	1.2595629515	0.3852919066	3.2691134431	0.0010788504	0.0327401894
Contig122733	#N/A	83.7767191501	1.263326917	0.3774686588	3.3468392345	0.000817386	0.0259328779
Contig123097	ref|XP_011874393.1| PREDICTED: uncharacterized protein LOC105565639 [Vollenhovia emeryi]	306.2152364176	1.281749983	0.3478841759	3.6844158821	0.0002292277	0.0089720742
Contig30449	ref|XP_012537908.1| PREDICTED: retinol dehydrogenase 11-like isoform X1 [Monomorium pharaonis]	275.8127013922	1.3061628458	0.4072209765	3.2075038401	0.0013389227	0.0392827585
Contig95896	#N/A	180.3760960843	1.3072098387	0.3812675089	3.4285896597	0.0006067261	0.0201951889
Contig1516	#N/A	391.9506402932	1.3142083164	0.3993953351	3.2904949081	0.0010001131	0.0307536416
Contig16842	ref|XP_011067192.1| PREDICTED: GATA-binding factor A-like isoform X1 [Acromyrmex echinatior]	104.9879210042	1.3289583912	0.4215716752	3.1523901378	0.0016193975	0.0459654488
Contig11546	ref|XP_011875817.1| PREDICTED: transferrin isoform X2 [Vollenhovia emeryi]	514.3622967477	1.33037774	0.3099363843	4.292421953	1.76734681844931E-05	0.0012536128
Contig17376	ref|XP_011874557.1| PREDICTED: angiotensin-converting enzyme-like [Vollenhovia emeryi]	198.8296917348	1.3328903605	0.4032212308	3.3056056048	0.0009477138	0.0293531611
Contig36937	ref|XP_009174316.1| hypothetical protein T265_09854 [Opisthorchis viverrini]	49.1134057441	1.3437672461	0.4035594724	3.3297873996	0.0008691232	0.0273202442
Contig104059	ref|XP_011163420.1| PREDICTED: putative glycerol kinase 5 isoform X1 [Solenopsis invicta]	185.7937381294	1.3449903919	0.4253650322	3.1619674632	0.0015670707	0.0447227616
Contig136774	ref|XP_011685882.1| PREDICTED: acyl-CoA synthetase short-chain family member 3, mitochondrial isoform X3 [Wasmannia auropunctata]	878.6175943632	1.3664262372	0.4123885264	3.3134438757	0.000921546	0.028668524
Contig107891	ref|XP_011173518.1| PREDICTED: dorsalin-1-like [Solenopsis invicta]	69.2893014067	1.3918491932	0.4158622171	3.3468998526	0.0008172073	0.0259328779
Contig142774	ref|XP_011050749.1| PREDICTED: calcium-transporting ATPase type 2C member 1 isoform X2 [Acromyrmex echinatior]	108.1123662914	1.3937648039	0.3200629294	4.3546586501	1.33274429853619E-05	0.0010490962
Contig24917	ref|XP_011693826.1| PREDICTED: guanine deaminase-like [Wasmannia auropunctata]	329.7352799743	1.3964952717	0.4011819825	3.4809521181	0.0004996348	0.0172019733
Contig13419	ref|XP_011156117.1| PREDICTED: FK506-binding protein 2 isoform X2 [Solenopsis invicta]	669.5571483393	1.4014231437	0.3820363196	3.6682982001	0.0002441703	0.0094703627
Contig125118	#N/A	106.2370708882	1.4026194093	0.4076773861	3.4405131531	0.0005806122	0.0195098131
Contig19463	#N/A	26.0189152949	1.4037313723	0.4451187172	3.153611201	0.0016126378	0.0457934783
Contig127684	ref|XP_012061303.1| PREDICTED: serine/threonine-protein phosphatase 2A 55 kDa regulatory subunit B beta isoform [Atta cephalotes]	77.0403807333	1.4053243181	0.2827814514	4.969648154	6.70745035030187E-07	0.0001125585
Contig117251	#N/A	67.7433197984	1.4235889491	0.4335369032	3.2836626796	0.0010246749	0.0313927765
Contig7887	ref|XP_011874822.1| PREDICTED: 15-hydroxyprostaglandin dehydrogenase [NAD(+)]-like [Vollenhovia emeryi]	1220.0866936321	1.4342991002	0.4153273058	3.4534187376	0.000553529	0.0187558738
Contig27446	ref|XP_011707355.1| PREDICTED: uncharacterized protein LOC105462450 [Wasmannia auropunctata]	36.804981497	1.4824271195	0.4226701309	3.5072909371	0.0004526939	0.0158956987
Contig68355	ref|XP_011685882.1| PREDICTED: acyl-CoA synthetase short-chain family member 3, mitochondrial isoform X3 [Wasmannia auropunctata]	202.6355705733	1.4827234624	0.4156941647	3.5668613814	0.0003612825	0.0131907309
Contig98626	ref|XP_011701925.1| PREDICTED: prolyl endopeptidase isoform X2 [Wasmannia auropunctata]	28.3767268886	1.484665458	0.4606326454	3.2231008218	0.0012681091	0.0375167529
Contig8586	ref|XP_012350570.1| PREDICTED: protein kinase 2-like isoform X1 [Apis florea]	226.3785419881	1.485805888	0.4688379959	3.1691243051	0.0015289899	0.0438574264
Contig119916	ref|XP_011877057.1| PREDICTED: bifunctional lysine-specific demethylase and histidyl-hydroxylase NO66 isoform X1 [Vollenhovia emeryi]	48.0616726277	1.4913661196	0.3925254075	3.7994129581	0.0001450392	0.0061174954
Contig28253	ref|XP_011176093.1| PREDICTED: trans-1,2-dihydrobenzene-1,2-diol dehydrogenase-like [Solenopsis invicta]	26.6808420218	1.511028915	0.4337818834	3.4833840991	0.0004951175	0.0170714032
Contig110798	#N/A	24.1223249203	1.513854673	0.3895031788	3.8866298284	0.0001016456	0.0045438654
Contig27807	ref|XP_011636648.1| PREDICTED: probable serine/threonine-protein kinase kinX [Pogonomyrmex barbatus]	303.6277016639	1.5143006677	0.4612642884	3.2829349805	0.0010273236	0.0314534646
Contig32087	ref|XP_011156705.1| PREDICTED: transferrin [Solenopsis invicta]	43.054448447	1.5145207781	0.4071593476	3.7197249356	0.0001994399	0.0079898651
Contig118484	ref|XP_011172508.1| PREDICTED: LOW QUALITY PROTEIN: D-3-phosphoglycerate dehydrogenase [Solenopsis invicta]	370.7845991095	1.5332261901	0.4611874621	3.3245183709	0.000885714	0.0277553178
Contig21702	ref|XP_011862704.1| PREDICTED: zonadhesin-like [Vollenhovia emeryi]	17105.2674901945	1.5348438708	0.4142549057	3.7050710803	0.0002113315	0.0083881242
Contig718	#N/A	30.3118273671	1.5609899513	0.4919007764	3.1733837921	0.0015067321	0.0433861967
Contig37581	#N/A	10.4337169114	1.5619930837	0.4827729363	3.2354611581	0.0012144641	0.0361415608
Contig6199	#N/A	26.9194834874	1.5639129912	0.4973025318	3.1447919349	0.0016620499	0.0469028691
Contig22753	ref|XP_011872915.1| PREDICTED: uncharacterized protein LOC105564821 [Vollenhovia emeryi]	23.3173819302	1.5974560706	0.4898900986	3.2608458003	0.0011108043	0.0335442007
Contig136194	ref|XP_012536370.1| PREDICTED: N-acetylgalactosamine kinase [Monomorium pharaonis]	36.84640702	1.6070461872	0.4436580295	3.6222632759	0.0002920367	0.0110272329
Contig6228	ref|XP_011862690.1| PREDICTED: von Willebrand factor D and EGF domain-containing protein-like [Vollenhovia emeryi]	1967.9254033958	1.6301081233	0.5119051758	3.1843946895	0.0014505708	0.0420433443
Contig23711	ref|XP_011638665.1| PREDICTED: acyl-CoA synthetase short-chain family member 3, mitochondrial [Pogonomyrmex barbatus]	73.3865125702	1.6381420812	0.4625322133	3.541682145	0.0003975843	0.0142745766
Contig37184	ref|XP_011869617.1| PREDICTED: solute carrier family 2, facilitated glucose transporter member 8-like [Vollenhovia emeryi]	13.2094807422	1.6474135831	0.4770029724	3.4536757181	0.0005530019	0.0187425066
Contig6443	ref|XP_011692903.1| PREDICTED: phosphatidylinositol 4-phosphate 3-kinase C2 domain-containing subunit beta isoform X4 [Wasmannia auropunctata]	155.1987894768	1.6507321057	0.4997983871	3.3027959841	0.00095726	0.0296034084
Contig30078	ref|XP_011699779.1| PREDICTED: probable chitinase 3 [Wasmannia auropunctata]	54.8178335096	1.6553711026	0.4619820355	3.5831936645	0.0003394188	0.0125153584
Contig19751	ref|XP_011051281.1| PREDICTED: A disintegrin and metalloproteinase with thrombospondin motifs 14 [Acromyrmex echinatior]	32.7652698562	1.6661954826	0.4981325804	3.3448835678	0.0008231712	0.0260788385
Contig22230	ref|XP_011862147.1| PREDICTED: uncharacterized protein LOC105558835 [Vollenhovia emeryi]	88.593407933	1.6717290536	0.4559164284	3.6667444939	0.000245658	0.0095176154
Contig21452	ref|XP_011862778.1| PREDICTED: GRAM domain-containing protein 1B-like isoform X2 [Vollenhovia emeryi]	165.6117560946	1.6759430368	0.3738129589	4.4833732942	7.34722357294939E-06	0.0007241848
Contig105269	ref|XP_011870253.1| PREDICTED: inhibin beta A chain isoform X2 [Vollenhovia emeryi]	175.5105015071	1.6768105814	0.5330020736	3.1459738423	0.0016553481	0.0467510934
Contig34649	ref|XP_011870124.1| PREDICTED: aminopeptidase N [Vollenhovia emeryi]	286.7925631296	1.6778036303	0.4340679808	3.8653015301	0.000110952	0.0048626521
Contig18724	#N/A	15.4997696832	1.7065381894	0.5434863525	3.1399835186	0.0016895734	0.0475277031
Contig131827	ref|XP_011882306.1| PREDICTED: zinc finger protein 2-like [Vollenhovia emeryi]	9.8650608423	1.737537644	0.5508684764	3.1541787529	0.0016095047	0.0457336209
Contig9390	ref|XP_011691852.1| PREDICTED: UTP--glucose-1-phosphate uridylyltransferase isoform X1 [Wasmannia auropunctata]	1054.9293744806	1.7607318038	0.5149181452	3.419440197	0.0006275012	0.0207644128
Contig127616	ref|XP_012054582.1| PREDICTED: LOW QUALITY PROTEIN: alpha-tocopherol transfer protein-like [Atta cephalotes]	18.5061939972	1.7640146977	0.5004985329	3.5245152218	0.0004242584	0.0150657061
Contig21888	#N/A	40.9612589444	1.7647086835	0.5335757241	3.3073256596	0.0009419132	0.029199103
Contig22391	ref|XP_012054571.1| PREDICTED: chondroadherin-like [Atta cephalotes]	874.5577238311	1.7818190123	0.5131314015	3.4724419654	0.0005157465	0.0176877267
Contig70121	ref|XP_011060922.1| PREDICTED: cysteine-rich secretory protein 1-like [Acromyrmex echinatior]	158.7142091122	1.7822598464	0.5253706389	3.3923857075	0.0006928683	0.0225472625
Contig30658	ref|XP_011164680.1| PREDICTED: alpha-tocopherol transfer protein-like [Solenopsis invicta]	121.4237450979	1.7923445921	0.480851466	3.7274391755	0.0001934352	0.0077779786
Contig145035	ref|XP_011881032.1| PREDICTED: gustatory and pheromone receptor 32a-like isoform X2 [Vollenhovia emeryi]	90.3940249134	1.7986404589	0.5403384307	3.3287294714	0.000872431	0.0274059328
Contig9126	ref|XP_012535786.1| PREDICTED: uncharacterized protein LOC105836358 [Monomorium pharaonis]	38.6266736211	1.8022545259	0.4990398265	3.6114442781	0.0003044965	0.0114002236
Contig22205	ref|XP_011875075.1| PREDICTED: homeobox protein unc-4-like [Vollenhovia emeryi]	40.6525189503	1.8088733811	0.5308657128	3.4074029224	0.0006558423	0.0215708926
Contig19154	ref|XP_011873307.1| PREDICTED: L-threonine 3-dehydrogenase, mitochondrial isoform X1 [Vollenhovia emeryi]	51.8663617028	1.8297997999	0.584288245	3.1316731351	0.0017381327	0.0486226359
Contig102242	ref|XP_011875303.1| PREDICTED: fatty acid synthase-like [Vollenhovia emeryi]	44.3045491501	1.8450709168	0.5384506517	3.4266295545	0.0006111222	0.0203223647
Contig56662	ref|XP_011695808.1| PREDICTED: zinc finger protein 131 isoform X6 [Wasmannia auropunctata]	8.4019795957	1.8788585849	0.5754226497	3.2651800999	0.001093945	0.0330704196
Contig125456	ref|XP_011871523.1| PREDICTED: uncharacterized protein LOC105564042 [Vollenhovia emeryi]	155.295201537	1.8893238239	0.5677339022	3.3278333679	0.000875242	0.0274820156
Contig92263	#N/A	14.9764986651	1.8904232493	0.5765274629	3.278982132	0.0010418223	0.0318219959
Contig16974	ref|XP_011053761.1| PREDICTED: receptor-type tyrosine-protein phosphatase F-like [Acromyrmex echinatior]	123.2908292839	1.8979433789	0.5667208545	3.3489915959	0.0008110626	0.0257761373
Contig26035	ref|XP_011700146.1| PREDICTED: UPF0565 protein C2orf69 homolog isoform X1 [Wasmannia auropunctata]	73.4812612131	1.9134745456	0.4737614009	4.0388992058	5.37026341388139E-05	0.002789954
Contig68354	ref|XP_011685880.1| PREDICTED: acyl-CoA synthetase short-chain family member 3, mitochondrial isoform X1 [Wasmannia auropunctata]	174.6604283327	1.9252274628	0.5312680999	3.6238341115	0.0002902678	0.0109789501
Contig126536	#N/A	19.5849444834	1.9257099157	0.5893785294	3.2673567489	0.0010855679	0.0328875401
Contig106730	ref|XP_011862314.1| PREDICTED: phosphotriesterase-related protein isoform X1 [Vollenhovia emeryi]	180.8760107092	1.9302372728	0.5900181344	3.2714880448	0.0010698311	0.0325223596
Contig25750	ref|XP_011861288.1| PREDICTED: neprilysin-like isoform X1 [Vollenhovia emeryi]	141.8588671566	1.945130953	0.5707876338	3.407801497	0.0006548852	0.0215444259
Contig143434	ref|XP_011707761.1| PREDICTED: 1,4-alpha-glucan-branching enzyme [Wasmannia auropunctata]	329.9418036999	1.9480941059	0.598895694	3.2528103399	0.0011426974	0.0343677552
Contig22444	#N/A	30.5150483755	1.9797472746	0.6141309946	3.2236563403	0.0012656519	0.0374675918
Contig6325	ref|XP_011051294.1| PREDICTED: alpha-tocopherol transfer protein-like [Acromyrmex echinatior]	233.2155042799	1.9968978314	0.5251240259	3.8027165642	0.0001431181	0.0060472946
Contig52066	ref|XP_011160751.1| PREDICTED: endothelin-converting enzyme 1-like, partial [Solenopsis invicta]	15.5132366687	10.177356974	3.01306176	3.3777458893	0.0007308258	0.0235707589
Contig112481	ref|XP_011881997.1| PREDICTED: thyrotropin-releasing hormone-degrading ectoenzyme-like [Vollenhovia emeryi]	22.1284651611	10.4046679377	3.2054105716	3.245970432	0.00117051	0.0350698782
Contig26387	ref|XP_011691069.1| PREDICTED: pre-mRNA-splicing factor SYF1 [Wasmannia auropunctata]	11.6245208032	11.2912053324	3.2974240502	3.4242503119	0.0006164981	0.0204626095
Contig103534	#N/A	0.4775966686	13.1064611886	4.1928053452	3.1259407747	0.0017723724	0.0494727195
Contig16213	#N/A	0.6759914864	13.1203045275	4.1959459638	3.1269002606	0.0017665985	0.0493287003
Contig51290	ref|XP_011066101.1| PREDICTED: chymotrypsin-like elastase family member 2A [Acromyrmex echinatior]	0.2356970614	13.2098340183	4.2059566696	3.1407442006	0.0016851915	0.0474327696
Contig48181	#N/A	0.2674145314	13.2099344154	4.2059566696	3.1407680708	0.0016850542	0.0474327696
Contig122725	ref|XP_011872986.1| PREDICTED: deoxyribose-phosphate aldolase [Vollenhovia emeryi]	10.9558820496	13.2107873692	4.1665673722	3.1706645276	0.0015209068	0.043669897
Contig41410	#N/A	0.2345318401	13.2342978629	4.2059566696	3.1465606763	0.0016520298	0.0466947099
Contig58502	#N/A	0.3153389648	13.234333602	4.2059566696	3.1465691736	0.0016519818	0.0466947099
Contig83786	#N/A	0.5504054861	13.2349796762	3.2360566964	4.0898478976	4.31656165451945E-05	0.0023822518
Contig108493	#N/A	0.3413270523	13.2376253117	4.2041244774	3.148723446	0.001639853	0.0464434383
Contig108495	#N/A	0.2665406869	13.2576095173	4.2012120566	3.1556630179	0.0016013375	0.0455534907
Contig124646	#N/A	0.2663936682	13.2662576015	4.2059566696	3.154159361	0.0016096116	0.0457336209
Contig72914	#N/A	0.2769155383	13.2875269108	4.2059566696	3.1592163102	0.0015819403	0.0450924787
Contig45348	#N/A	0.3240492642	13.2920448361	4.2059566696	3.1602904833	0.0015761192	0.0449446839
Contig121829	#N/A	0.2732387479	13.3086643053	4.2040613779	3.1656684118	0.0015472706	0.044238102
Contig72909	#N/A	0.342521489	13.3150676605	4.2059566696	3.1657643448	0.0015467605	0.044238102
Contig71334	ref|XP_012541080.1| PREDICTED: RNA-directed DNA polymerase from mobile element jockey-like [Monomorium pharaonis]	0.8614920946	13.3218259651	4.2015696372	3.1706783691	0.0015208343	0.043669897
Contig134746	#N/A	0.3542083079	13.3228257712	4.1954800675	3.1755187861	0.0014956884	0.0431298529
Contig143946	#N/A	0.3256251699	13.3285664973	4.1954901639	3.1768794531	0.001488689	0.0429630903
Contig53474	ref|XP_011696169.1| PREDICTED: leukotriene A-4 hydrolase [Wasmannia auropunctata]	0.57268441	13.3359787739	4.2059566696	3.1707361301	0.001520532	0.043669897
Contig65092	#N/A	0.4928486028	13.3452736138	4.2040890392	3.1743556069	0.0015016959	0.0432847617
Contig47777	#N/A	0.2853707569	13.3726133354	4.2059566696	3.1794462915	0.0014755671	0.0426628211
Contig118072	#N/A	0.3109967862	13.4209909203	4.2059566696	3.1909484511	0.0014180658	0.0412280744
Contig142315	#N/A	0.1919861068	13.4370909004	4.2059566696	3.1947763507	0.0013993924	0.0407774685
Contig97608	#N/A	0.3792657017	13.4596941501	4.2059566696	3.200150455	0.0013735587	0.0401156918
Contig102179	#N/A	0.3015258958	13.4630229595	4.2042665374	3.2022286978	0.0013636869	0.0399092371
Contig38222	#N/A	0.484270378	13.4696206693	4.2059566696	3.2025105647	0.001362353	0.0398873593
Contig76830	#N/A	0.2528499032	13.4819451233	4.2059566697	3.2054408027	0.0013485578	0.0395244089
Contig54817	#N/A	0.2325681209	13.4960857429	4.2059566697	3.2088028486	0.0013328885	0.0391382277
Contig121935	#N/A	0.2115099786	13.5001770141	4.2059566697	3.2097755813	0.0013283864	0.0390141374
Contig15820	#N/A	0.6178647458	13.5505666072	4.2017056963	3.2250156452	0.0012596578	0.037297962
Contig47431	#N/A	3.6602143415	13.5628165864	4.1803981272	3.2443839495	0.0011770497	0.0352359302
Contig91351	#N/A	0.6889707047	13.5723482702	4.2059566696	3.2269348774	0.0012512393	0.0370797746
Contig79700	#N/A	1.1132408296	13.604140563	4.2052876995	3.2350082884	0.001216392	0.0361760766
Contig137766	ref|XP_968724.1| PREDICTED: pathogenesis-related protein 5 [Tribolium castaneum]	0.2898248391	13.605340782	4.2040814327	3.2362219904	0.0012112315	0.0360681505
Contig88043	ref|XP_012942128.1| PREDICTED: probable beta-D-xylosidase 7 [Aplysia californica]	0.6180827495	13.6105917314	4.2059566696	3.2360275677	0.0012120568	0.0360851215
Contig41519	ref|XP_011874752.1| PREDICTED: DDB1- and CUL4-associated factor 11 [Vollenhovia emeryi]	0.2901924655	13.6231808661	4.2059566696	3.2390207356	0.0011994085	0.0357915158
Contig104976	#N/A	0.3541133661	13.629809063	4.1981058443	3.246656842	0.0011676909	0.0350002586
Contig125600	#N/A	0.2796571466	13.6353358804	4.2059566696	3.241910688	0.0011873122	0.0354905139
Contig62650	ref|XP_011880608.1| PREDICTED: protein-cysteine N-palmitoyltransferase Rasp isoform X1 [Vollenhovia emeryi]	1.3984280608	13.6445857892	4.2010520526	3.2478973405	0.0011626121	0.0348776223
Contig36492	#N/A	0.3123595159	13.6643569622	4.2059566696	3.2488106834	0.0011588858	0.0347806042
Contig56058	#N/A	0.3123595159	13.6643569622	4.2059566696	3.2488106834	0.0011588858	0.0347806042
Contig80716	ref|XP_011688222.1| PREDICTED: F-box/LRR-repeat protein 4-like [Wasmannia auropunctata]	0.3248237539	13.6666035697	4.2040651496	3.2508067985	0.0011507803	0.0345650097
Contig83794	ref|XP_012527698.1| PREDICTED: probable cytochrome P450 6a20 [Monomorium pharaonis]	0.3397987263	13.6988019401	4.2059566696	3.2570002537	0.0011259633	0.0339366979
Contig84511	#N/A	0.2507511043	13.7192314958	4.2040836383	3.2633107893	0.0011011869	0.0332751074
Contig123220	#N/A	0.2794029801	13.7218452599	4.2059566697	3.2624789882	0.0011044236	0.0333657775
Contig34057	#N/A	0.4658840608	13.7310183693	4.2035117067	3.2665588507	0.0010886318	0.032959161
Contig50584	#N/A	0.4903117929	13.7376749861	4.2034019475	3.2682277731	0.0010822323	0.0328129955
Contig125631	#N/A	0.2735147587	13.7399342114	4.2039434634	3.2683441942	0.0010817872	0.0328081748
Contig80308	#N/A	0.3108155847	13.7576686036	4.2059566696	3.2709962761	0.0010716932	0.0325579524
Contig116155	#N/A	0.2363632533	13.7668197312	4.2059566696	3.2731720302	0.0010634773	0.0323431234
Contig45594	ref|XP_011695054.1| PREDICTED: dedicator of cytokinesis protein 7 [Wasmannia auropunctata]	0.5882727337	13.7737091376	4.2059566696	3.2748100419	0.0010573304	0.0321838906
Contig147341	#N/A	0.3334036074	13.7772398444	4.2059566696	3.2756494958	0.001054193	0.0321160661
Contig95421	ref|XP_015050400.1| uncharacterized protein Dyak_GE21989, isoform B [Drosophila yakuba]	0.3151515313	13.7960132774	4.2059566696	3.2801130304	0.0010376551	0.03172734
Contig69910	ref|XP_012529381.1| PREDICTED: transcription factor collier isoform X4 [Monomorium pharaonis]	0.7513511689	13.8079797789	4.2004024155	3.2872992664	0.0010115328	0.0310439928
Contig111477	#N/A	0.6132881699	13.837254514	4.2059566696	3.2899184659	0.0010021642	0.0308033046
Contig33530	ref|XP_016037401.1| ATPsyn-beta [Drosophila simulans]	0.8910165184	13.851481797	4.2059566696	3.2933011167	0.0009901837	0.0305147179
Contig131907	#N/A	0.2441982972	13.8519975184	4.2059566697	3.2934237336	0.0009897519	0.0305080656
Contig149148	#N/A	0.2441982972	13.8519975184	4.2059566697	3.2934237336	0.0009897519	0.0305080656
Contig88219	#N/A	6.9091396786	13.8848156342	4.2059566697	3.3012265044	0.0009626313	0.0297564913
Contig42513	#N/A	0.2932930707	13.9007828524	4.202768461	3.3075300201	0.0009412262	0.0291842095
Contig127550	ref|XP_011640611.1| PREDICTED: protein unc-45 homolog B isoform X1 [Pogonomyrmex barbatus]	0.3830806241	13.9110887621	4.201012548	3.3113656775	0.000928418	0.0288503799
Contig61893	ref|XP_011644058.1| PREDICTED: uncharacterized protein LOC105431518 [Pogonomyrmex barbatus]	0.3058440275	13.914108053	4.2040625181	3.3096815266	0.0009340218	0.0289926354
Contig94439	#N/A	0.492107533	13.936656563	4.2059566696	3.3135521019	0.0009211894	0.028668524
Contig96967	#N/A	0.3766762117	13.9366670146	4.2032217751	3.3157106049	0.0009141044	0.0284870319
Contig141701	#N/A	0.1057342593	13.9393619755	4.1980010059	3.3204760923	0.0008986406	0.0280794371
Contig57021	ref|XP_011705630.1| PREDICTED: uncharacterized protein LOC105460837 [Wasmannia auropunctata]	0.1057342593	13.9393619755	4.1980010059	3.3204760923	0.0008986406	0.0280794371
Contig109595	ref|XP_011861203.1| PREDICTED: intraflagellar transport protein 80 homolog isoform X1 [Vollenhovia emeryi]	0.2618986687	13.9517267436	4.2059566697	3.3171351584	0.0009094561	0.02837973
Contig136633	#N/A	0.2140343052	13.9791185279	4.2040708943	3.3251386286	0.0008837458	0.0277054301
Contig54017	#N/A	0.308491676	13.9814768598	4.2059566696	3.3242084876	0.0008866988	0.0277681593
Contig133337	#N/A	0.3071232989	13.9890676174	4.2020449105	3.3291094968	0.0008712414	0.0273746504
Contig80957	ref|XP_011631790.1| PREDICTED: gamma-aminobutyric acid receptor subunit beta isoform X1 [Pogonomyrmex barbatus]	0.1816784652	13.9895244994	4.2059566697	3.3261218786	0.0008806341	0.0276288327
Contig117482	#N/A	0.2321005501	14.0016660363	4.196969303	3.3361373471	0.0008495118	0.0268175011
Contig120011	ref|XP_012522618.1| PREDICTED: uncharacterized protein LOC105828694, partial [Monomorium pharaonis]	0.5105906921	14.0232701642	4.1991500387	3.3395496791	0.0008391434	0.0265313148
Contig140010	ref|XP_012215612.1| PREDICTED: uncharacterized protein LOC105668019, partial [Linepithema humile]	0.3655906301	14.0405435226	4.1998859888	3.3430773026	0.0008285482	0.026225665
Contig72947	#N/A	0.413165748	14.0659873801	4.2059566696	3.344301543	0.0008249002	0.0261277582
Contig40050	ref|XP_011163099.1| PREDICTED: uncharacterized protein LOC105198146 isoform X1 [Solenopsis invicta]	0.7388122112	14.0736740686	4.2059566696	3.346129115	0.0008194823	0.0259794451
Contig88789	#N/A	0.3522620708	14.0739022978	4.2059566697	3.3461833783	0.0008193219	0.0259794451
Contig19452	#N/A	0.239840866	14.0868010705	4.2059566696	3.3492501652	0.000810306	0.0257636819
Contig63561	ref|XP_011866719.1| PREDICTED: mediator of RNA polymerase II transcription subunit 1 [Vollenhovia emeryi]	0.239840866	14.0868010705	4.2059566696	3.3492501652	0.000810306	0.0257636819
Contig32189	ref|XP_011868162.1| PREDICTED: tetratricopeptide repeat protein 17 isoform X1 [Vollenhovia emeryi]	4.6503488941	14.1086263348	4.1943375723	3.3637317196	0.0007689625	0.0246376642
Contig91306	#N/A	0.3478034935	14.117891901	4.2059566696	3.35664226	0.0007889512	0.0251867239
Contig136592	ref|XP_012221592.1| PREDICTED: leishmanolysin-like peptidase [Linepithema humile]	0.4467827891	14.1234118277	4.2059566696	3.3579546669	0.0007852149	0.0250731669
Contig144127	ref|XP_012530377.1| PREDICTED: zinc finger protein 85-like [Monomorium pharaonis]	0.3601426145	14.1259336393	4.2059566696	3.3585542479	0.0007835134	0.0250414146
Contig114137	ref|XP_011876991.1| PREDICTED: uncharacterized protein LOC105567061 isoform X1 [Vollenhovia emeryi]	9.7442734656	14.1367117281	4.1519392383	3.4048455232	0.0006620149	0.0217176725
Contig101814	#N/A	0.1027756956	14.1429242978	4.1994404309	3.3678116241	0.0007576735	0.0243754524
Contig110733	ref|XP_011161709.1| PREDICTED: transmembrane protein 50B [Solenopsis invicta]	0.2255428782	14.14294572	4.2040896377	3.3640923336	0.0007679585	0.0246222434
Contig94334	ref|XP_011169907.1| PREDICTED: uncharacterized protein LOC105202916, partial [Solenopsis invicta]	0.577786287	14.1497263818	4.2059566696	3.3642111637	0.0007676279	0.0246172297
Contig65625	#N/A	0.374358903	14.1581044114	4.2059566696	3.3662031075	0.0007621057	0.0244623469
Contig59743	ref|XP_012542909.1| PREDICTED: type-1 glutamine synthetase 1-like [Monomorium pharaonis]	0.3136867724	14.1613520704	4.2059566696	3.3669752646	0.000759975	0.0244161424
Contig86769	#N/A	0.3136867724	14.1613520704	4.2059566696	3.3669752646	0.000759975	0.0244161424
Contig105707	ref|XP_017101086.1| PREDICTED: protein unc-13 homolog A-like, partial [Drosophila bipectinata]	0.2988181615	14.2040218734	4.1941423996	3.3866331946	0.0007075592	0.0229460622
Contig46058	#N/A	0.2798403045	14.2133122581	4.2038494343	3.3810231504	0.0007221646	0.0233286897
Contig136106	ref|XP_011877563.1| PREDICTED: UPF0160 protein MYG1, mitochondrial isoform X2 [Vollenhovia emeryi]	0.2657996338	14.2330439055	4.1932873525	3.3942448273	0.0006881814	0.0224266537
Contig120713	ref|XP_013294803.1| hypothetical protein NECAME_18785 [Necator americanus]	0.3892037427	14.2357787179	4.2059566696	3.3846707981	0.0007126367	0.023078942
Contig68591	ref|XP_011172929.1| PREDICTED: nose resistant to fluoxetine protein 6-like [Solenopsis invicta]	0.9408736166	14.2371237484	4.2059566696	3.38499059	0.0007118069	0.0230573558
Contig53943	#N/A	0.3374885303	14.2385702696	4.2040900709	3.3868375866	0.0007070323	0.0229342386
Contig114729	#N/A	0.1644311004	14.2457888335	4.2018165957	3.390388064	0.0006979375	0.0226860996
Contig127199	#N/A	0.1644311004	14.2457888335	4.2018165957	3.390388064	0.0006979375	0.0226860996
Contig82718	ref|XP_016915682.1| PREDICTED: ubiquitin-conjugating enzyme E2-24 kDa [Apis cerana]	0.917344973	14.2460140935	4.2059566696	3.3871043409	0.0007063452	0.0229224749
Contig53638	#N/A	0.2221479858	14.2532599152	4.2059566697	3.3888270933	0.0007019226	0.0227894193
Contig128367	ref|XP_011159224.1| PREDICTED: uncharacterized protein LOC105195497 [Solenopsis invicta]	0.2165126862	14.2660334193	4.2040983838	3.3933633604	0.0006903999	0.0224914068
Contig112004	ref|XP_011874806.1| PREDICTED: uncharacterized protein LOC105565871 [Vollenhovia emeryi]	1.0358951984	14.2677652312	4.2059566696	3.3922758487	0.0006931462	0.0225511116
Contig37236	ref|XP_016843801.1| PREDICTED: uncharacterized protein LOC107981763 [Nasonia vitripennis]	0.2635182428	14.2869861499	4.199520483	3.4020517837	0.0006688196	0.0219008594
Contig77766	#N/A	0.253610194	14.3023304766	4.2059566697	3.4004940136	0.0006726421	0.0219903538
Contig36685	#N/A	0.214993123	14.3127661971	4.1949650196	3.4118916678	0.0006451375	0.0212633516
Contig67073	#N/A	0.5982343831	14.332143964	4.2041932569	3.409011691	0.0006519869	0.0214540724
Contig129875	#N/A	0.3319852813	14.3501456299	4.201140011	3.4157741928	0.0006360096	0.020996788
Contig130103	#N/A	0.2890536886	14.3532173645	4.2010158897	3.4166063022	0.000634069	0.0209376145
Contig57555	#N/A	0.2168847919	14.3549014416	4.1998598354	3.4179477421	0.0006309522	0.0208541879
Contig101083	ref|XP_011868353.1| PREDICTED: muscle LIM protein 1-like isoform X5 [Vollenhovia emeryi]	0.3486534783	14.3916647954	4.2059566696	3.4217339659	0.0006222316	0.020628687
Contig38872	ref|XP_017032609.1| PREDICTED: transketolase-like [Drosophila kikkawai]	0.5680620321	14.3933374093	4.2015851303	3.4256922002	0.0006132349	0.0203830276
Contig91141	ref|XP_011861558.1| PREDICTED: phenylalanine--tRNA ligase beta subunit, chloroplastic-like [Vollenhovia emeryi]	0.3368820035	14.3959935568	4.2059566696	3.4227631637	0.0006198806	0.0205603923
Contig44976	#N/A	0.2820441125	14.4036401279	4.1977063973	3.431311951	0.0006006694	0.02003134
Contig103420	#N/A	0.2166366677	14.4284655847	4.2059566697	3.4304836493	0.0006025063	0.0200831164
Contig101792	#N/A	0.3715552991	14.4403701439	4.2005597833	3.4377251816	0.0005866227	0.0196743491
Contig109000	#N/A	0.1984611046	14.4565961825	4.199762293	3.4422415304	0.0005769149	0.0193994154
Contig68767	#N/A	0.4392321668	14.4693681714	4.2059566696	3.440208568	0.0005812661	0.019517859
Contig49401	#N/A	0.3267648986	14.4754373384	4.2059566696	3.4416515612	0.0005781745	0.0194371446
Contig131463	#N/A	0.3954154793	14.4833204178	4.1899691433	3.456665174	0.0005469039	0.0185670071
Contig120166	#N/A	0.2589321236	14.4836413373	4.1929270417	3.4543032095	0.0005517167	0.0187124135
Contig80088	#N/A	0.3528065663	14.4879753698	4.2059566696	3.4446325789	0.0005718361	0.0192469577
Contig32646	#N/A	0.3650006732	14.4904202559	4.2059566696	3.4452138703	0.0005706077	0.0192224702
Contig133640	#N/A	0.3725378283	14.4913537094	4.2059566696	3.4454358063	0.0005701394	0.0192127313
Contig56323	#N/A	0.4506309252	14.5068002921	4.1966513568	3.4567561274	0.0005467194	0.0185652026
Contig111960	#N/A	0.2357676624	14.5144116996	4.1951454142	3.4598113454	0.000540554	0.0183911998
Contig135820	ref|XP_008204072.1| PREDICTED: uncharacterized protein LOC103315691 [Nasonia vitripennis]	0.6612721718	14.5228013445	4.1973691394	3.4599771576	0.0005402212	0.0183843056
Contig100440	#N/A	0.2240300272	14.5264329108	4.1948381774	3.4629304628	0.0005343265	0.0182188047
Contig70160	#N/A	0.5714496235	14.5290561271	4.2043462697	3.4557230054	0.000548819	0.0186275468
Contig148460	ref|XP_011694911.1| PREDICTED: NACHT and WD repeat domain-containing protein 1-like [Wasmannia auropunctata]	1.011499572	14.5339467636	4.2041931012	3.4570121814	0.0005462002	0.0185520298
Contig136629	#N/A	0.2676952957	14.5365899752	4.1988173138	3.4620677416	0.0005360422	0.018257487
Contig126343	#N/A	0.4661596412	14.5709771594	4.1906564288	3.4770154525	0.0005070286	0.0174395373
Contig103345	#N/A	0.5283636404	14.5910027805	4.1946872234	3.4784483332	0.0005043256	0.0173550174
Contig102786	#N/A	0.1290306151	14.606139718	4.2012994937	3.4765766497	0.000507859	0.0174553535
Contig33324	ref|XP_011701846.1| PREDICTED: larval cuticle protein A2B-like [Wasmannia auropunctata]	0.440266861	14.6309343612	4.1937417849	3.4887542227	0.0004852771	0.0168100518
Contig43177	#N/A	0.3611490729	14.6337671113	4.1867322244	3.4952718079	0.0004735792	0.0164856669
Contig130732	#N/A	0.4430408736	14.6349387941	4.1826713174	3.4989454546	0.0004671021	0.0163447571
Contig106022	#N/A	0.2086934681	14.6416750851	4.2059566697	3.4811759215	0.0004992175	0.0171917947
Contig81240	#N/A	0.2196433447	14.646842577	4.2040621133	3.4839738763	0.0004940277	0.017037987
Contig145226	#N/A	0.282918235	14.6499082371	4.1987272996	3.4891306798	0.0004845942	0.0167946294
Contig109638	#N/A	0.3153232928	14.656284678	4.1929496926	3.4954592239	0.0004732468	0.0164856669
Contig98658	#N/A	0.2027873464	14.6640149601	4.2059566697	3.4864874063	0.0004894084	0.0169282601
Contig40197	ref|XP_004207219.1| PREDICTED: zinc finger MYM-type protein 1-like [Hydra vulgaris]	0.3017978053	14.6665603849	4.1931924187	3.4977074554	0.0004692756	0.0163842924
Contig45510	ref|XP_011865370.1| PREDICTED: 1-phosphatidylinositol 4,5-bisphosphate phosphodiesterase gamma-1 isoform X3 [Vollenhovia emeryi]	0.366091926	14.6761386509	4.2059566696	3.4893699112	0.0004841607	0.0167929298
Contig59823	ref|XP_011704430.1| PREDICTED: cytochrome P450 6B7-like isoform X2 [Wasmannia auropunctata]	0.405014321	14.6796830104	4.199668991	3.4954381028	0.0004732842	0.0164856669
Contig20060	#N/A	0.1634120688	14.6873580196	4.2014946692	3.4957459609	0.0004727385	0.0164766989
Contig55966	ref|XP_015751239.1| PREDICTED: delta(8)-fatty-acid desaturase 2-like [Acropora digitifera]	4.496896946	14.6952704259	4.2059566697	3.4939186445	0.000475986	0.0165572132
Contig80525	#N/A	0.1734112186	14.7003301548	4.2024901289	3.4980046839	0.0004687529	0.0163748089
Contig97570	ref|XP_017045460.1| PREDICTED: uvrABC system protein A-like [Drosophila ficusphila]	0.4770632436	14.7012123177	4.2059566696	3.495331377	0.0004734735	0.0164856669
Contig83617	#N/A	11.2181937511	14.7052874414	4.2008260493	3.500570428	0.0004642635	0.0162575084
Contig118367	ref|XP_015436399.1| PREDICTED: protein sprint [Dufourea novaeangliae]	0.4623226481	14.7178519171	4.2003963793	3.5039197704	0.0004584635	0.0160703328
Contig141989	ref|XP_011175427.1| PREDICTED: heparan sulfate glucosamine 3-O-sulfotransferase 5 [Solenopsis invicta]	0.2713524312	14.7193249601	4.2009151429	3.5038377257	0.0004586047	0.0160712976
Contig24861	#N/A	0.1797184876	14.7225312259	4.1960007983	3.508705535	0.0004502932	0.0158389524
Contig144608	#N/A	0.2750648976	14.742250671	4.1990328285	3.5108681625	0.0004466459	0.0157380845
Contig11610	ref|XP_011858947.1| PREDICTED: uncharacterized protein LOC105556465 [Vollenhovia emeryi]	0.2598802506	14.7423878068	4.2020516208	3.5083785582	0.000450847	0.0158523241
Contig70385	#N/A	0.5219475561	14.7489675255	4.2031525159	3.5090250638	0.0004497525	0.0158278161
Contig145127	ref|XP_011643446.1| PREDICTED: LOW QUALITY PROTEIN: putative DNA helicase Ino80 [Pogonomyrmex barbatus]	0.4827464894	14.7498481269	4.1948594731	3.5161721677	0.000437817	0.0154655563
Contig121486	#N/A	0.5373976538	14.7531270787	4.2032958527	3.5098949956	0.0004482837	0.015783987
Contig122370	ref|XP_011879066.1| PREDICTED: aminopeptidase N-like isoform X1 [Vollenhovia emeryi]	0.1875508142	14.7704551172	4.1953754769	3.5206515361	0.0004304879	0.0152447754
Contig131624	#N/A	0.1875508142	14.7704551172	4.1953754769	3.5206515361	0.0004304879	0.0152447754
Contig50571	ref|XP_011157108.1| PREDICTED: uncharacterized protein LOC105194077 [Solenopsis invicta]	0.3657146207	14.7788199014	4.198564994	3.5199693044	0.0004315967	0.0152725583
Contig128551	#N/A	0.2342390092	14.7801124859	4.2059566697	3.5140905261	0.0004412624	0.0155716918
Contig141165	ref|XP_011693188.1| PREDICTED: E3 ubiquitin-protein ligase NEDD4 isoform X3 [Wasmannia auropunctata]	0.2987474701	14.7992374219	4.1938616526	3.5287853171	0.0004174717	0.014873296
Contig135290	#N/A	0.1523922447	14.8051490312	4.1960142198	3.5283839033	0.0004181053	0.0148847304
Contig141983	#N/A	0.2450061538	14.8075283972	4.1932315993	3.5312927623	0.0004135338	0.0147553234
Contig141907	ref|XP_011633902.1| PREDICTED: zinc finger protein 583, partial [Pogonomyrmex barbatus]	0.1308967967	14.8079664487	4.1973288627	3.5279500208	0.0004187912	0.0148940204
Contig59887	#N/A	0.1308967967	14.8079664487	4.1973288627	3.5279500208	0.0004187912	0.0148940204
Contig66473	ref|XP_011879931.1| PREDICTED: glutamate receptor ionotropic, kainate 2-like [Vollenhovia emeryi]	0.4566540972	14.824737619	4.2059566696	3.5247005101	0.0004239618	0.0150627441
Contig129535	#N/A	0.2623214733	14.831462649	4.1952091488	3.5353333107	0.0004072611	0.0145572405
Contig74074	ref|XP_011860502.1| PREDICTED: tubulin polyglutamylase TTLL5 [Vollenhovia emeryi]	0.4267563633	14.8443188995	4.1888776819	3.5437460882	0.000394485	0.0141830896
Contig77733	#N/A	0.2819169097	14.8550282281	4.2040843142	3.5334753344	0.0004101344	0.0146488257
Contig107085	#N/A	0.1653884792	14.8554278015	4.1945752081	3.541580986	0.0003977367	0.0142745766
Contig4487	ref|XP_011865488.1| PREDICTED: uncharacterized protein LOC105560735 [Vollenhovia emeryi]	0.1653884792	14.8554278015	4.1945752081	3.541580986	0.0003977367	0.0142745766
Contig86759	ref|XP_012537839.1| PREDICTED: uncharacterized protein LOC105837526 [Monomorium pharaonis]	0.2948699535	14.8630363365	4.2037191486	3.5356872833	0.0004067158	0.0145487918
Contig110479	ref|XP_011629899.1| PREDICTED: uncharacterized protein LOC105422287 [Pogonomyrmex barbatus]	1.0082661984	14.8735776631	4.198541121	3.5425585303	0.0003962655	0.0142434807
Contig150255	#N/A	0.1759110021	14.8849671278	4.1949074216	3.5483422235	0.0003876642	0.0139804435
Contig39413	#N/A	0.2673984755	14.8947103711	4.1922618446	3.5529055491	0.0003810012	0.0137613322
Contig104546	#N/A	4.1244417481	14.897540641	4.2059566696	3.5420100137	0.0003970904	0.0142695021
Contig101297	ref|XP_011876124.1| PREDICTED: lachesin-like isoform X3 [Vollenhovia emeryi]	1.0418161931	14.9025072047	4.1805332771	3.5647383281	0.0003642194	0.0132876594
Contig146031	#N/A	0.2637897114	14.906055218	4.2041078075	3.5455930011	0.0003917307	0.0141026477
Contig25148	ref|XP_011863343.1| PREDICTED: uncharacterized protein LOC105559564 isoform X2 [Vollenhovia emeryi]	1.3188935961	14.9150555905	4.1809570729	3.5673783132	0.0003605707	0.0131715519
Contig63816	ref|XP_011880098.1| PREDICTED: CD151 antigen [Vollenhovia emeryi]	0.318368571	14.9158739143	4.1918159007	3.5583322998	0.000373217	0.0135327666
Contig86616	ref|XP_011702698.1| PREDICTED: uncharacterized protein LOC105458829 [Wasmannia auropunctata]	0.2409243111	14.9330524251	4.1963988288	3.558539842	0.0003729222	0.0135283163
Contig55100	ref|XP_011686532.1| PREDICTED: patched domain-containing protein 1-like, partial [Wasmannia auropunctata]	0.3314859886	14.9430854938	4.2032043945	3.5551650815	0.0003777418	0.0136597797
Contig146798	#N/A	0.6063491221	14.954100426	4.1823065867	3.5755629378	0.0003494751	0.0128159307
Contig91879	ref|XP_011867199.1| PREDICTED: uncharacterized protein LOC105561647 [Vollenhovia emeryi]	0.185578055	14.9553457996	4.1958155848	3.5643477406	0.0003647621	0.0132937303
Contig43550	#N/A	0.351569352	14.9572084639	4.2007219255	3.5606280847	0.0003699688	0.0134487986
Contig60192	#N/A	0.4162266748	14.9683363898	4.204885832	3.5597485848	0.00037121	0.0134765828
Contig58568	ref|XP_012530732.1| PREDICTED: thyroid receptor-interacting protein 11 [Monomorium pharaonis]	0.3839346345	14.9759676058	4.1994650891	3.5661607581	0.0003622492	0.0132226108
Contig149235	#N/A	0.2284425752	14.9897246722	4.2020241382	3.5672628665	0.0003607296	0.0131739483
Contig103904	#N/A	0.5505372313	14.9900674065	4.2059566696	3.5640089958	0.0003652334	0.0133074749
Contig122673	ref|XP_011861509.1| PREDICTED: putative helicase mov-10-B.1 isoform X2 [Vollenhovia emeryi]	0.4424668923	14.9909894584	4.1913539379	3.5766460386	0.0003480309	0.0127762341
Contig51994	ref|XP_011170893.1| PREDICTED: SCAN domain-containing protein 3-like [Solenopsis invicta]	0.5368731684	14.9917152142	4.2020949706	3.5676764373	0.0003601609	0.013160125
Contig52562	#N/A	0.4062619317	14.9974612645	4.2020391081	3.5690913099	0.0003582216	0.0130992838
Contig124534	#N/A	0.2593258031	15.0160158033	4.1930058438	3.581205551	0.0003420124	0.0125912797
Contig24438	ref|XP_012061678.1| PREDICTED: high affinity cationic amino acid transporter 1 [Atta cephalotes]	0.962663581	15.0212555852	4.178483019	3.5949064569	0.0003245082	0.0120378127
Contig63014	ref|XP_011051695.1| PREDICTED: katanin p60 ATPase-containing subunit A-like 1 [Acromyrmex echinatior]	1.2811102914	15.0340233248	4.2004437742	3.5791511881	0.000344712	0.0126741538
Contig121538	#N/A	0.3729801658	15.034374105	4.2041864038	3.57604841	0.0003488271	0.0127988108
Contig146360	#N/A	0.2020375151	15.048972729	4.194579097	3.5877193828	0.000333583	0.0123323602
Contig129165	ref|XP_012533032.1| PREDICTED: regulating synaptic membrane exocytosis protein 2 isoform X2 [Monomorium pharaonis]	0.8317684947	15.0544162296	4.1821762963	3.5996608375	0.0003186325	0.0118447295
Contig69948	ref|XP_011636348.1| PREDICTED: probable RNA-binding protein 18 [Pogonomyrmex barbatus]	3.6675443357	15.0640874458	3.6860416774	4.0867924902	4.37377986343921E-05	0.0024046769
Contig133634	#N/A	0.2504635956	15.0672576052	4.1886906665	3.5971282686	0.0003217498	0.0119480387
Contig124855	ref|XP_011157661.1| PREDICTED: ras-related and estrogen-regulated growth inhibitor [Solenopsis invicta]	2.0303621891	15.0675643868	4.1759588991	3.6081687466	0.0003083659	0.0115267666
Contig99920	#N/A	0.2856955132	15.0699310187	4.1929623591	3.5941011934	0.0003255133	0.0120655968
Contig133862	#N/A	0.1655489768	15.0770279577	4.1968510959	3.5924619705	0.0003275685	0.0121226931
Contig147375	#N/A	0.1655489768	15.0770279577	4.1968510959	3.5924619705	0.0003275685	0.0121226931
Contig143223	#N/A	0.1913491194	15.0789400367	4.1964331554	3.5932754028	0.0003265471	0.0120912289
Contig100109	ref|XP_011865116.1| PREDICTED: chromatin assembly factor 1 subunit B [Vollenhovia emeryi]	2.9827416908	15.0813055184	4.175591618	3.6117769404	0.0003041061	0.011388624
Contig107143	#N/A	0.4143209837	15.1104149409	4.1861558977	3.6096159125	0.0003066507	0.0114717573
Contig141887	#N/A	0.2099095368	15.1130041962	4.1957755554	3.6019572536	0.0003158303	0.011756026
Contig70346	#N/A	0.4036870432	15.1175665573	4.2059566696	3.5943229436	0.0003252362	0.0120584894
Contig75581	ref|XP_014681608.1| PREDICTED: sodium-dependent phosphate transporter 1-like [Priapulus caudatus]	0.6232605279	15.1331669747	4.2059566696	3.5980320682	0.0003206341	0.0119128676
Contig70188	ref|XP_011693598.1| PREDICTED: ankyrin repeat and death domain-containing protein 1A-like isoform X4 [Wasmannia auropunctata]	0.6962446552	15.1386049027	4.1832591543	3.6188541862	0.0002959103	0.0111340848
Contig79465	ref|XP_011684319.1| PREDICTED: uncharacterized protein LOC105447811 [Wasmannia auropunctata]	0.4474494285	15.1443760313	4.2023092001	3.603822401	0.0003135714	0.0116910875
Contig76176	ref|XP_011871302.1| PREDICTED: dynein heavy chain 8, axonemal [Vollenhovia emeryi]	0.3965905245	15.1474703105	4.2041859113	3.6029496864	0.0003146264	0.011720478
Contig101413	#N/A	0.1788216601	15.1571511773	4.2059566697	3.6037345051	0.0003136775	0.0116912915
Contig144333	#N/A	0.3042400286	15.1583334015	4.1887626376	3.6188093509	0.0002959616	0.0111340848
Contig103757	#N/A	0.495357507	15.1730243114	4.2059566696	3.6075084703	0.0003091514	0.0115530739
Contig114173	ref|XP_011162665.1| PREDICTED: carbonic anhydrase-related protein 10 [Solenopsis invicta]	0.8263539753	15.1847299656	4.1975639313	3.6175101116	0.0002974507	0.0111838461
Contig51479	ref|XP_014478525.1| PREDICTED: uncharacterized protein LOC106746434 isoform X1 [Dinoponera quadriceps]	0.6995324248	15.192940806	4.2004002894	3.6170221311	0.0002980118	0.0111992881
Contig33993	#N/A	0.2849551736	15.1973865479	4.2017975495	3.6168773885	0.0002981785	0.0111992881
Contig148749	ref|XP_012218253.1| PREDICTED: THAP domain-containing protein 4-like [Linepithema humile]	0.4030033512	15.2086044954	4.2059566697	3.615967945	0.0002992274	0.0112297303
Contig19702	ref|XP_011861774.1| PREDICTED: uncharacterized protein LOC105558604 [Vollenhovia emeryi]	0.3966089567	15.2112558854	4.2039807747	3.6182981561	0.0002965466	0.0111528218
Contig1241	ref|XP_011156397.1| PREDICTED: protein inturned [Solenopsis invicta]	1.2955600484	15.2115494441	4.1985673387	3.623033339	0.0002911683	0.011003264
Contig107172	#N/A	0.3537472572	15.2168521369	4.2030273417	3.6204504277	0.0002940906	0.0110810983
Contig101069	ref|XP_012536011.1| PREDICTED: uncharacterized protein LOC105836495 isoform X2 [Monomorium pharaonis]	0.7211335118	15.226613707	4.1838865105	3.6393467339	0.0002733306	0.0104294708
Contig147737	ref|XP_011873116.1| PREDICTED: golgin subfamily A member 2 [Vollenhovia emeryi]	0.9549765714	15.2324525727	4.2059566696	3.621638017	0.0002927436	0.0110433857
Contig149433	ref|XP_011881115.1| PREDICTED: sarcoplasmic calcium-binding protein 1 [Vollenhovia emeryi]	0.3457687814	15.2539411382	4.1923406497	3.638526163	0.0002742028	0.010457228
Contig105738	#N/A	0.3347580666	15.2767950133	4.1886230995	3.6472116613	0.0002651015	0.0101476997
Contig134118	ref|XP_012215102.1| PREDICTED: succinyl-CoA ligase [GDP-forming] subunit beta, mitochondrial [Linepithema humile]	0.2653057808	15.2778302988	4.2041273977	3.6340074535	0.0002790528	0.0106135458
Contig157	#N/A	0.3590332785	15.2833683671	4.2059566696	3.6337436564	0.0002793384	0.0106202172
Contig111642	#N/A	0.3265649053	15.286323526	4.1974118266	3.6418450601	0.000270691	0.0103344566
Contig46213	#N/A	0.3249513933	15.3081614439	4.1868157218	3.6562778162	0.000255904	0.0098390393
Contig138366	#N/A	0.325012344	15.3173647124	4.1862496705	3.6589706582	0.0002532303	0.0097574818
Contig147420	ref|XP_012229072.1| PREDICTED: LOW QUALITY PROTEIN: zinc transporter 1 [Linepithema humile]	0.3503590165	15.3458015886	4.1879638491	3.6642631459	0.0002480517	0.0095945677
Contig48856	#N/A	0.2576341704	15.3513314818	4.1912196653	3.6627360787	0.0002495356	0.0096440459
Contig143916	#N/A	0.4253567749	15.3584015546	4.2004012601	3.6564129481	0.0002557692	0.0098365331
Contig127369	#N/A	0.5072278273	15.3584237745	4.1974593291	3.6589809622	0.0002532201	0.0097574818
Contig75444	ref|XP_012542890.1| PREDICTED: sorbitol dehydrogenase-like [Monomorium pharaonis]	0.667303368	15.3691468703	4.1993551305	3.6598826231	0.0002523308	0.0097307822
Contig130927	#N/A	0.2157951863	15.3710463758	4.2059566697	3.6545898075	0.0002575935	0.0098959181
Contig68370	ref|XP_011698217.1| PREDICTED: glutamate receptor ionotropic, delta-2-like isoform X2 [Wasmannia auropunctata]	1.5691703651	15.3788924859	4.1995145165	3.6620643709	0.000250191	0.0096614467
Contig126383	#N/A	0.3583185443	15.3830748875	4.2010273233	3.6617412132	0.0002505068	0.0096683598
Contig110219	ref|XP_011866791.1| PREDICTED: protein virilizer isoform X3 [Vollenhovia emeryi]	1.020632387	15.3961836898	4.1805087746	3.6828492702	0.0002306415	0.0090124332
Contig143302	#N/A	0.1549244482	15.4065770999	4.1972399716	3.6706448056	0.0002419394	0.00938641
Contig122556	#N/A	0.399571515	15.4116753334	4.1842517981	3.6832571454	0.0002302727	0.0090029984
Contig46853	#N/A	0.4318783004	15.4179753867	4.1992318983	3.6716179911	0.0002410198	0.0093584416
Contig90922	ref|XP_012246367.1| PREDICTED: probable uroporphyrinogen-III C-methyltransferase [Bombus impatiens]	0.5639819444	15.4313648857	4.1993574826	3.6746966529	0.0002381322	0.0092666928
Contig39724	ref|XP_012535516.1| PREDICTED: protein timeless homolog [Monomorium pharaonis]	0.2778251993	15.4400616575	4.1882129675	3.6865512277	0.0002273137	0.0089119711
Contig135359	#N/A	0.3097962584	15.4452040071	4.1892026976	3.6869077775	0.0002269956	0.0089069129
Contig137253	ref|XP_011876243.1| PREDICTED: WD repeat-containing protein CG11141 isoform X1 [Vollenhovia emeryi]	2.6370777252	15.4545585243	4.1831760007	3.6944557249	0.0002203583	0.0086802243
Contig118572	#N/A	0.4793673637	15.463897999	4.2020975325	3.6800426167	0.000233195	0.0091046562
Contig116005	ref|XP_011694911.1| PREDICTED: NACHT and WD repeat domain-containing protein 1-like [Wasmannia auropunctata]	0.2360002259	15.4675224064	4.1891134061	3.6923140787	0.0002222228	0.0087414848
Contig82538	#N/A	0.6279108993	15.4774449463	4.2018645353	3.6834707108	0.0002300797	0.0090004363
Contig107451	#N/A	0.8171242509	15.4809211641	4.2041965696	3.6822543637	0.0002311806	0.0090285025
Contig146251	#N/A	0.4736101809	15.5084925489	4.1955759549	3.6963917983	0.0002186854	0.0086239439
Contig99275	ref|XP_011172322.1| PREDICTED: cyclin-dependent kinases regulatory subunit [Solenopsis invicta]	1.0638261483	15.5154441736	4.1995605231	3.6945399616	0.0002202852	0.0086802243
Contig119230	ref|XP_012543515.1| PREDICTED: uncharacterized protein LOC105840971, partial [Monomorium pharaonis]	0.2065793497	15.5272924838	4.2059566697	3.6917385754	0.0002227263	0.0087588542
Contig64678	ref|XP_014206012.1| PREDICTED: 5'-AMP-activated protein kinase catalytic subunit alpha-2 [Copidosoma floridanum]	1.1427757317	15.5381799682	4.1989540913	3.7004881764	0.0002151851	0.0085168095
Contig129308	#N/A	0.1654107846	15.5410599538	4.1963652001	3.7034574478	0.0002126809	0.0084295004
Contig138706	#N/A	0.1654107846	15.5410599538	4.1963652001	3.7034574478	0.0002126809	0.0084295004
Contig139166	#N/A	0.1654107846	15.5410599538	4.1963652001	3.7034574478	0.0002126809	0.0084295004
Contig141986	#N/A	0.1654107846	15.5410599538	4.1963652001	3.7034574478	0.0002126809	0.0084295004
Contig54665	ref|XP_011692056.1| PREDICTED: tyrosine-protein phosphatase non-receptor type 11-like [Wasmannia auropunctata]	0.5028476392	15.5410907987	4.2033930845	3.6972727713	0.0002179281	0.008603686
Contig143423	ref|XP_011692311.1| PREDICTED: uncharacterized protein LOC105452679 isoform X2 [Wasmannia auropunctata]	0.4087438371	15.545956181	4.1850173944	3.7146694305	0.0002034695	0.0081213646
Contig106434	#N/A	0.2681334582	15.5520259363	4.1928458281	3.7091814424	0.0002079304	0.0082783713
Contig110344	ref|XP_011165057.1| PREDICTED: uncharacterized protein LOC105199598 [Solenopsis invicta]	2.9495938639	15.5560933407	4.1934901531	3.7095814639	0.0002076022	0.0082676328
Contig36998	#N/A	1.3601198702	15.5727209456	3.4418314218	4.5245449405	6.05255915366771E-06	0.0006320831
Contig69389	ref|XP_012526097.1| PREDICTED: Down syndrome cell adhesion molecule-like protein Dscam2 isoform X30 [Monomorium pharaonis]	0.7041328711	15.5770479041	3.7454986688	4.1588715633	3.19823657581281E-05	0.0019051485
Contig79997	#N/A	0.3145039097	15.5790711284	4.2013515201	3.7081094152	0.0002088124	0.0083052377
Contig100083	#N/A	0.2427066202	15.5829617387	4.1936428165	3.7158533572	0.000202519	0.008087996
Contig58118	ref|XP_011051284.1| PREDICTED: uncharacterized protein LOC105144216 [Acromyrmex echinatior]	0.6791739209	15.5891995787	3.834805073	4.0651869604	0.000047994	0.0025962498
Contig394	#N/A	1.1151610338	15.6112065911	4.2059566696	3.7116898288	0.0002058802	0.0082083103
Contig59334	#N/A	0.4834922162	15.6188328698	4.1948665802	3.7233205327	0.0001966196	0.0078947898
Contig78663	#N/A	0.2025528403	15.6196455363	4.2059566696	3.7136962559	0.0002042539	0.0081457712
Contig61207	ref|XP_011881734.1| PREDICTED: ATP-binding cassette sub-family C member Sur [Vollenhovia emeryi]	1.0962573595	15.6198018941	4.1999923955	3.7190071846	0.0002000074	0.0080063331
Contig93192	#N/A	0.3745911447	15.6244966766	4.2020727678	3.7182832235	0.0002005813	0.0080219467
Contig101687	#N/A	0.2907775739	15.6369156043	4.1864815052	3.7350972613	0.0001876427	0.0075860783
Contig100995	ref|XP_011873844.1| PREDICTED: putative nuclease HARBI1 isoform X2 [Vollenhovia emeryi]	0.1953783227	15.6504601656	4.1945508295	3.731140902	0.0001906146	0.0076908244
Contig146295	ref|XP_011877154.1| PREDICTED: uncharacterized protein LOC105567148 [Vollenhovia emeryi]	0.3651646009	15.6766710654	4.2030734261	3.7298113728	0.0001916232	0.007722698
Contig125031	ref|XP_011708245.1| PREDICTED: FAS-associated factor 1 isoform X3 [Wasmannia auropunctata]	0.6330473482	15.6778563563	4.2059566696	3.7275363461	0.0001933607	0.0077771945
Contig100798	#N/A	0.2080170177	15.6808632713	4.204056208	3.7299366363	0.0001915279	0.0077210619
Contig105696	ref|XP_011695841.1| PREDICTED: adenomatous polyposis coli protein-like [Wasmannia auropunctata]	0.4883965944	15.6864320335	4.2059566697	3.7295752823	0.0001918028	0.007727733
Contig117574	ref|XP_012058965.1| PREDICTED: leukotriene A-4 hydrolase [Atta cephalotes]	0.7906345988	15.6906666747	4.1948156732	3.7404901423	0.0001836617	0.007450719
Contig67456	ref|XP_011870333.1| PREDICTED: exonuclease mut-7 homolog isoform X1 [Vollenhovia emeryi]	1.2732252768	15.6986013339	4.2059566696	3.7324686313	0.0001896123	0.0076547575
Contig83791	ref|XP_011705214.1| PREDICTED: cytochrome P450 6l1-like, partial [Wasmannia auropunctata]	0.3196041979	15.7109083698	4.2022337191	3.7387040845	0.0001849713	0.0074952365
Contig122083	#N/A	0.2174059256	15.7210510686	4.2059566697	3.7378062361	0.0001856329	0.0075198895
Contig63735	ref|XP_011859278.1| PREDICTED: cytochrome P450 4C1-like [Vollenhovia emeryi]	0.3782906812	15.7310854752	4.1982561976	3.7470522843	0.0001789248	0.0072752627
Contig67194	#N/A	0.3740035593	15.7403689458	4.1908553367	3.7558845823	0.0001727303	0.0070488641
Contig128660	ref|XP_011685218.1| PREDICTED: tachykinin-like peptides receptor 86C [Wasmannia auropunctata]	0.2869696345	15.7434108337	4.1868749697	3.7601817459	0.00016979	0.0069569949
Contig83220	#N/A	0.5633917231	15.7450800908	4.2008520612	3.748068216	0.0001782018	0.0072542146
Contig37528	#N/A	0.2915119935	15.7556249707	4.2041804051	3.7476091539	0.0001785282	0.0072654068
Contig87328	ref|XP_009045737.1| hypothetical protein LOTGIDRAFT_137237 [Lottia gigantea]	0.3773642859	15.7694542926	4.2059566696	3.7493144916	0.0001773186	0.0072224235
Contig112835	ref|XP_011175740.1| PREDICTED: dynein heavy chain 1, axonemal-like [Solenopsis invicta]	0.6088697255	15.7765359434	4.1957295441	3.7601413003	0.0001698174	0.0069569949
Contig69782	ref|XP_011879409.1| PREDICTED: thyroid adenoma-associated protein homolog isoform X1 [Vollenhovia emeryi]	1.2317057381	15.7942787558	4.1920092438	3.7677108607	0.0001647514	0.0067800367
Contig139954	#N/A	0.2255231552	15.7970133683	4.2020762459	3.7593352533	0.0001703654	0.0069733843
Contig72029	#N/A	0.2472808249	15.8046370862	4.204041848	3.7593909998	0.0001703275	0.0069733843
Contig16018	ref|XP_011871903.1| PREDICTED: uncharacterized protein LOC105564262 isoform X2 [Vollenhovia emeryi]	0.8258545307	15.8146870408	4.2059566696	3.760068941	0.0001698665	0.0069569949
Contig126961	#N/A	0.9389432478	15.8249616589	4.2000029287	3.7678453867	0.0001646626	0.0067792354
Contig130050	ref|XP_011871373.1| PREDICTED: uncharacterized protein LOC105563955, partial [Vollenhovia emeryi]	0.3939020686	15.8328484301	4.1908308797	3.777973601	0.0001581096	0.0065456833
Contig135379	#N/A	0.7433378201	15.8357516653	4.2008362367	3.7696665076	0.0001634658	0.0067378152
Contig92175	#N/A	0.3953207788	15.8365236755	4.2001859557	3.7704339385	0.0001629639	0.0067210495
Contig126107	#N/A	0.6385489212	15.8568901465	4.180810179	3.7927792623	0.0001489706	0.0062441693
Contig72468	ref|XP_013186435.1| PREDICTED: transposable element Tcb1 transposase [Amyelois transitella]	0.5228070472	15.8615516265	4.2010486239	3.7756172438	0.0001596119	0.0066001423
Contig138307	ref|XP_011858724.1| PREDICTED: uncharacterized protein LOC105556248 isoform X2 [Vollenhovia emeryi]	0.2752251944	15.861743347	4.2059566697	3.771256956	0.0001624273	0.0067028305
Contig139526	#N/A	0.2752251944	15.861743347	4.2059566697	3.771256956	0.0001624273	0.0067028305
Contig147495	#N/A	0.2752251944	15.861743347	4.2059566697	3.771256956	0.0001624273	0.0067028305
Contig119161	#N/A	0.2240950414	15.8653775425	4.1966579992	3.7804790253	0.0001565269	0.0064896662
Contig133968	#N/A	0.2852809369	15.8728980845	4.1926078202	3.7859248385	0.000153138	0.0063715943
Contig89063	#N/A	0.5829407492	15.8847546203	4.1972997726	3.7845175424	0.000154007	0.0064039828
Contig94032	ref|XP_011631079.1| PREDICTED: LOW QUALITY PROTEIN: transcription factor Adf-1-like [Pogonomyrmex barbatus]	0.8698217574	15.8867849276	4.1953489333	3.7867612874	0.0001526236	0.0063539352
Contig762	#N/A	0.5551233181	15.9028672756	4.1976278524	3.7885367247	0.0001515372	0.0063170254
Contig16246	ref|XP_011860974.1| PREDICTED: beta-1,4-glucuronyltransferase 1-like [Vollenhovia emeryi]	2.5664367971	15.902907	3.2047001952	4.9623696544	6.96382992180579E-07	0.0001162967
Contig49437	ref|XP_011879209.1| PREDICTED: lanC-like protein 2 [Vollenhovia emeryi]	1.4715917707	15.9086141846	4.2003803832	3.787422265	0.0001522183	0.0063407981
Contig101017	#N/A	0.3621757049	15.911298625	4.1994722567	3.7888805194	0.0001513277	0.0063111409
Contig54787	#N/A	0.1980778256	15.9168963192	4.1980430619	3.7915038233	0.0001497378	0.0062710729
Contig58804	ref|XP_011704437.1| PREDICTED: WD repeat-containing protein 60 [Wasmannia auropunctata]	1.7717594774	15.9357268419	4.1777747082	3.8144055041	0.0001365112	0.0058045793
Contig37960	ref|XP_012527596.1| PREDICTED: mitochondrial substrate carrier family protein U-like [Monomorium pharaonis]	1.9284755882	15.9452702458	4.1926572159	3.8031418799	0.0001428725	0.0060387233
Contig84115	ref|XP_011702509.1| PREDICTED: run domain Beclin-1 interacting and cysteine-rich containing protein [Wasmannia auropunctata]	1.4077136989	15.9730846069	4.2059566696	3.7977292354	0.0001460277	0.0061555123
Contig10547	#N/A	0.6898345111	15.9831178947	4.1843383419	3.8197479718	0.0001335881	0.0056888481
Contig117255	#N/A	0.4493488506	16.0132434477	4.2059566696	3.8072773225	0.0001405052	0.0059529107
Contig12571	#N/A	0.5635495363	16.0355183257	4.1983918098	3.8194430278	0.0001337533	0.0056941689
Contig103375	ref|XP_011863786.1| PREDICTED: saccharopine dehydrogenase-like oxidoreductase [Vollenhovia emeryi]	2.3124004627	16.056359274	4.1762291834	3.8447026178	0.0001206987	0.0052042622
Contig62510	#N/A	0.4136742444	16.0661850886	4.1816074931	3.8421073989	0.0001219824	0.0052478473
Contig99274	ref|XP_011172322.1| PREDICTED: cyclin-dependent kinases regulatory subunit [Solenopsis invicta]	0.5642907811	16.0809500375	4.1949172905	3.833436734	0.0001263653	0.0054122581
Contig26491	ref|XP_011869035.1| PREDICTED: cell adhesion molecule 2-like [Vollenhovia emeryi]	0.7980960314	16.0902538339	4.1846348529	3.8450795349	0.0001205133	0.0052010305
Contig118788	ref|XP_011161572.1| PREDICTED: isocitrate dehydrogenase [NAD] subunit beta, mitochondrial [Solenopsis invicta]	0.4470852407	16.0951010015	4.195607546	3.8361788669	0.0001249634	0.0053538372
Contig119945	ref|XP_012530723.1| PREDICTED: mitogen-activated protein kinase-binding protein 1-like isoform X3 [Monomorium pharaonis]	0.1957157533	16.1046009238	4.1921007701	3.8416540553	0.000122208	0.005253308
Contig118731	#N/A	0.4055354536	16.1199070215	4.1809088248	3.8555987937	0.0001154467	0.0050129907
Contig147242	#N/A	0.1700083758	16.1349173975	4.2006928103	3.8410134056	0.0001225274	0.0052638362
Contig49080	ref|XP_012542677.1| PREDICTED: uncharacterized protein LOC105840320 [Monomorium pharaonis]	0.6031633219	16.1493150243	4.2053710806	3.8401640937	0.0001229521	0.0052788705
Contig149927	ref|XP_011065520.1| PREDICTED: protein abnormal spindle [Acromyrmex echinatior]	0.6238654476	16.1627659582	4.1884987983	3.8588445972	0.0001139243	0.0049590784
Contig44301	#N/A	0.267087996	16.1713099971	4.2059566696	3.8448589149	0.0001206218	0.0052041224
Contig84555	#N/A	0.7461363458	16.173782009	4.2004208669	3.8505146321	0.0001178699	0.0051103595
Contig61937	#N/A	0.2741919102	16.1756011923	4.2059566696	3.8458791811	0.0001201209	0.0051904371
Contig103127	#N/A	0.5225696792	16.1761203232	4.2059566696	3.8460026086	0.0001200605	0.0051894115
Contig41240	#N/A	0.2287472104	16.1855653099	4.2020644773	3.8518126977	0.0001172467	0.0050864616
Contig43933	ref|XP_011860768.1| PREDICTED: UDP-N-acetylglucosamine--dolichyl-phosphate N-acetylglucosaminephosphotransferase [Vollenhovia emeryi]	0.470385677	16.1890640591	4.2042918893	3.8506042124	0.0001178268	0.0051100585
Contig51878	#N/A	0.5797442483	16.192140474	4.1992493225	3.8559607278	0.000115276	0.0050071172
Contig41731	ref|XP_011697508.1| PREDICTED: lymphocyte cytosolic protein 2-like [Wasmannia auropunctata]	0.861128949	16.1981405099	4.1957345593	3.8606208951	0.0001130993	0.0049353264
Contig84694	#N/A	0.2611946133	16.223457651	4.2020786096	3.8608172664	0.0001130084	0.0049328846
Contig77151	#N/A	0.4611255151	16.2280208025	4.1988222625	3.8648982472	0.0001111355	0.0048691831
Contig73865	#N/A	0.4789603892	16.2506556262	4.1999099465	3.8692866831	0.0001091542	0.0047987448
Contig666	#N/A	0.6049889765	16.2689154499	4.1804215369	3.8916925737	9.95473311974241E-05	0.0044781086
Contig116492	#N/A	1.8466772055	16.2842936406	4.1972450116	3.8797576971	0.0001045606	0.0046401053
Contig130544	#N/A	0.1880166641	16.285497505	4.2020740395	3.8755855685	0.0001063686	0.0047095083
Contig67006	ref|XP_011871560.1| PREDICTED: helicase POLQ-like [Vollenhovia emeryi]	1.017813128	16.2892628052	4.2059566696	3.872903143	0.0001075466	0.0047532088
Contig50657	#N/A	0.4334548301	16.2942264248	4.1927562606	3.8862803875	0.0001017919	0.0045486699
Contig128404	#N/A	0.3758905402	16.2958995323	4.1860710334	3.8928865283	9.90584927298352E-05	0.0044603785
Contig144193	#N/A	0.2027710618	16.298388794	4.2006923972	3.879929129	0.0001044869	0.0046382929
Contig79132	ref|XP_011874430.1| PREDICTED: potassium/sodium hyperpolarization-activated cyclic nucleotide-gated channel 1-like [Vollenhovia emeryi]	0.5783623684	16.3044632921	4.1962395865	3.8854938942	0.0001021221	0.0045605375
Contig116027	#N/A	0.2087794731	16.312444955	4.2059566696	3.8784148854	0.0001051393	0.0046643226
Contig7283	ref|XP_011874189.1| PREDICTED: uncharacterized protein LOC105565515 isoform X3 [Vollenhovia emeryi]	1.1633114483	16.3305211883	4.1989888352	3.8891556585	0.0001005936	0.0045079518
Contig141821	#N/A	0.1900691402	16.3359057705	4.1922899322	3.8966545813	9.75305657425055E-05	0.0044028039
Contig103346	ref|XP_012234439.1| PREDICTED: uncharacterized protein LOC105679152 [Linepithema humile]	0.6283343984	16.3525917789	4.2059566696	3.8879601155	0.0001010902	0.0045287719
Contig16662	ref|XP_012530120.1| PREDICTED: uncharacterized protein LOC105833160 isoform X1 [Monomorium pharaonis]	0.31860948	16.3665631702	4.1862337792	3.9096151896	9.24432659120004E-05	0.0042162544
Contig93552	ref|XP_011865165.1| PREDICTED: axonemal 84 kDa protein-like [Vollenhovia emeryi]	0.7366593737	16.3732962181	4.1940727789	3.9039132321	9.46497260281915E-05	0.00429885
Contig134446	ref|XP_011860241.1| PREDICTED: syntaxin-binding protein 5 isoform X6 [Vollenhovia emeryi]	0.5412515963	16.3842179931	4.1952929503	3.9053811467	0.000094077	0.004282473
Contig134879	#N/A	0.4011819278	16.3921103662	4.2059566696	3.8973559772	9.72486208644316E-05	0.0043931546
Contig105550	#N/A	0.2063832895	16.4224066399	4.2059566697	3.9045591597	9.43972991924923E-05	0.0042901432
Contig118015	ref|XP_014489453.1| PREDICTED: sodium-dependent nutrient amino acid transporter 1-like [Dinoponera quadriceps]	0.2894648391	16.4256842025	4.2020799033	3.9089414244	9.27014356913686E-05	0.0042253015
Contig39952	ref|XP_011860711.1| PREDICTED: ralA-binding protein 1 [Vollenhovia emeryi]	3.0205108109	16.4390225025	4.2059566696	3.9085097146	9.28672137261443E-05	0.0042314926
Contig139441	ref|XP_011865469.1| PREDICTED: sodium-coupled monocarboxylate transporter 1-like isoform X2 [Vollenhovia emeryi]	1.213699172	16.4491787907	4.1929142796	3.9230896922	8.74205873270569E-05	0.0040432952
Contig141953	#N/A	0.1806200911	16.4590968887	4.2020785036	3.9168941928	8.96970928597115E-05	0.0041069119
Contig126011	ref|XP_011858704.1| PREDICTED: uncharacterized protein LOC105556230, partial [Vollenhovia emeryi]	0.2262484853	16.4727191367	4.2020735853	3.9201405692	8.84973342070657E-05	0.004073097
Contig98253	ref|XP_011867093.1| PREDICTED: peroxisomal biogenesis factor 3 isoform X1 [Vollenhovia emeryi]	0.7038397568	16.4727324135	3.7482311732	4.3948016151	1.10873962147276E-05	0.0009392353
Contig72410	ref|XP_012536405.1| PREDICTED: cytochrome P450 4C1-like, partial [Monomorium pharaonis]	1.4566778889	16.4794445176	4.0675671453	4.0514253186	5.0906574954273E-05	0.0026984609
Contig113491	#N/A	0.3065835533	16.4798860509	4.2020782859	3.9218417482	8.78747016083424E-05	0.0040517224
Contig110738	#N/A	0.583648832	16.4956227981	4.1984951658	3.9289369516	8.532220392838E-05	0.0039644102
Contig148323	ref|XP_011704265.1| PREDICTED: tRNA pseudouridine synthase A, mitochondrial-like, partial [Wasmannia auropunctata]	0.8873594675	16.5153319548	4.1986898347	3.9334489102	8.37356432272611E-05	0.0039022412
Contig113113	ref|XP_011167374.1| PREDICTED: mitochondrial-processing peptidase subunit alpha [Solenopsis invicta]	0.286825122	16.5249321984	4.1964266935	3.9378579457	8.22122386957985E-05	0.003844143
Contig103391	ref|XP_011875460.1| PREDICTED: centrosomal protein of 131 kDa-like [Vollenhovia emeryi]	0.3993253036	16.5298460707	4.1951007376	3.9402739301	8.13886186109394E-05	0.0038180503
Contig53467	#N/A	0.2636045515	16.5346470339	4.1923192315	3.9440333908	8.01224946375123E-05	0.0037658717
Contig53645	ref|XP_011702240.1| PREDICTED: uncharacterized protein LOC105458545 [Wasmannia auropunctata]	0.2316631042	16.5394373131	4.2006934457	3.9373111908	8.23997198791748E-05	0.0038514169
Contig68861	ref|XP_011873718.1| PREDICTED: RNA-directed DNA polymerase from mobile element jockey-like [Vollenhovia emeryi]	0.5450603899	16.543825178	4.1963603029	3.9424224766	8.06627269909748E-05	0.0037877705
Contig129399	ref|XP_011865448.1| PREDICTED: uncharacterized protein LOC105560706 [Vollenhovia emeryi]	0.190104366	16.5576081741	4.2020787832	3.9403373968	8.13670880132772E-05	0.0038180503
Contig141536	ref|XP_012057735.1| PREDICTED: uncharacterized protein LOC105620869 [Atta cephalotes]	1.379950897	16.5814902202	4.0790378037	4.0650494107	4.80222871369721E-05	0.0025967873
Contig138047	ref|XP_011174555.1| PREDICTED: UPF0668 protein C10orf76 homolog [Solenopsis invicta]	1.2505391362	16.5827283254	4.2010476333	3.9472840522	7.90427576772424E-05	0.0037228348
Contig9768	#N/A	0.536537388	16.5966091232	4.1873126931	3.9635466324	7.38444308274212E-05	0.003550186
Contig73369	#N/A	0.2965589327	16.6006779969	4.2020790771	3.9505867672	7.79598280377376E-05	0.0037071046
Contig126407	#N/A	0.2581820091	16.6067242045	4.1999986614	3.9539832137	7.68608042195971E-05	0.0036677477
Contig147002	ref|XP_011870354.1| PREDICTED: fatty acid synthase-like [Vollenhovia emeryi]	0.2146800234	16.6161866422	4.2059566696	3.9506319126	7.79451229210285E-05	0.0037071046
Contig53575	#N/A	0.2913213523	16.6217765113	4.2020791833	3.9556076376	7.63403662754725E-05	0.0036478406
Contig93339	#N/A	0.2302498052	16.6684981621	4.2020787916	3.9667267057	7.28664644568637E-05	0.0035091387
Contig111077	ref|XP_011860060.1| PREDICTED: transcriptional regulator ATRX [Vollenhovia emeryi]	1.3477777862	16.6724903846	4.192065031	3.9771545196	6.97448466189317E-05	0.0033765511
Contig72434	ref|XP_011690834.1| PREDICTED: vacuolar protein sorting-associated protein 35 isoform X1 [Wasmannia auropunctata]	3.0011027584	16.701719351	4.1914676798	3.9846947721	6.75669179965546E-05	0.0033046046
Contig46832	#N/A	0.5161287734	16.7088011418	4.1936104369	3.9843474718	6.76658022096715E-05	0.0033082958
Contig45840	#N/A	0.2149868688	16.7090654924	4.2020783413	3.9763812417	6.99719173108129E-05	0.0033858979
Contig91499	ref|XP_012222386.1| PREDICTED: survival of motor neuron-related-splicing factor 30 isoform X1 [Linepithema humile]	1.3946083684	16.7401499422	4.1944644625	3.9910100781	6.57924841364223E-05	0.0032301184
Contig103393	#N/A	0.4137656971	16.7546879105	4.1967637754	3.9922875833	6.54389432587764E-05	0.0032205943
Contig34253	ref|XP_011689151.1| PREDICTED: protein CutA homolog isoform X1 [Wasmannia auropunctata]	0.2201596594	16.7607344325	4.2020768476	3.9886787035	6.64423406041287E-05	0.0032563661
Contig61725	ref|XP_012532092.1| PREDICTED: uncharacterized protein LOC105834282 [Monomorium pharaonis]	0.2686755387	16.7657822516	4.1999987748	3.9918540815	6.55587098906016E-05	0.0032222214
Contig90898	#N/A	0.2387024985	16.78656736	4.2020786479	3.9948246491	6.47421517676154E-05	0.0031918604
Contig139277	ref|XP_011692064.1| PREDICTED: otoferlin-like isoform X3 [Wasmannia auropunctata]	1.2831294267	16.791894109	4.1921084574	4.0055962959	6.18612253389237E-05	0.0030907355
Contig82575	#N/A	0.2430384451	16.7945278863	4.2020765073	3.9967211109	6.42258915567395E-05	0.003177495
Contig140780	ref|XP_011645157.1| PREDICTED: transcription factor SPT20 homolog [Pogonomyrmex barbatus]	3.4870462087	16.8027832585	4.1980189448	4.0025506029	6.26632596319061E-05	0.0031127828
Contig116178	#N/A	0.2415450986	16.8053938065	4.2006930688	4.0006240711	6.3175652841212E-05	0.0031343154
Contig54764	#N/A	0.130817336	16.8103427089	4.1977090188	4.0046469714	6.21101662314131E-05	0.0030988631
Contig84800	#N/A	0.130817336	16.8103427089	4.1977090188	4.0046469714	6.21101662314131E-05	0.0030988631
Contig51215	#N/A	0.258391327	16.8121081245	4.2006925706	4.0022229291	6.2750131354162E-05	0.0031153919
Contig143501	ref|XP_011697832.1| PREDICTED: coiled-coil domain-containing protein 51-like [Wasmannia auropunctata]	1.9571616278	16.8298128056	4.1984335941	4.0085933071	6.10815044585682E-05	0.0030615939
Contig120865	#N/A	0.3062328651	16.8443845599	4.2018060393	4.008843912	6.10167288513909E-05	0.0030594325
Contig12702	#N/A	0.654777144	16.853687282	4.1963019922	4.0163189668	5.91142348999051E-05	0.0029886479
Contig87249	#N/A	0.6041702602	16.857186405	4.1999998965	4.0136159096	5.97956185178955E-05	0.0030131746
Contig44929	#N/A	0.1717726316	16.8917433334	4.196577591	4.0251235601	5.69454073556512E-05	0.0029016283
Contig79922	ref|XP_011560566.1| PREDICTED: uncharacterized protein LOC105390889 [Plutella xylostella]	0.1717726316	16.8917433334	4.196577591	4.0251235601	5.69454073556512E-05	0.0029016283
Contig81274	#N/A	0.1717726316	16.8917433334	4.196577591	4.0251235601	5.69454073556512E-05	0.0029016283
Contig86677	#N/A	0.1717726316	16.8917433334	4.196577591	4.0251235601	5.69454073556512E-05	0.0029016283
Contig93943	#N/A	0.1717726316	16.8917433334	4.196577591	4.0251235601	5.69454073556512E-05	0.0029016283
Contig95270	#N/A	0.1717726316	16.8917433334	4.196577591	4.0251235601	5.69454073556512E-05	0.0029016283
Contig104327	#N/A	0.1311436721	16.899373944	4.1962596853	4.0272469321	5.64337558863665E-05	0.0028880552
Contig149177	#N/A	0.1311436721	16.899373944	4.1962596853	4.0272469321	5.64337558863665E-05	0.0028880552
Contig142145	#N/A	0.2529535661	16.9126239309	4.200692898	4.0261510045	5.66972863210061E-05	0.0028993535
Contig116125	ref|XP_011157574.1| PREDICTED: uncharacterized protein LOC105194390 [Solenopsis invicta]	0.6951727316	16.9127416198	4.1960829964	4.0306022627	5.56341172415901E-05	0.0028595612
Contig150113	#N/A	0.4337302644	16.9145290144	4.199804411	4.0274563668	5.63835267508752E-05	0.0028875764
Contig53031	#N/A	0.3052746875	16.9558638848	4.2020750186	4.035116891	5.45751209554763E-05	0.0028287971
Contig127637	#N/A	0.2111951067	16.956207019	4.1968914148	4.0401824453	5.34096369546237E-05	0.0027796028
Contig129292	#N/A	0.2111951067	16.956207019	4.1968914148	4.0401824453	5.34096369546237E-05	0.0027796028
Contig113209	#N/A	0.2442303281	16.9591948086	4.2059566696	4.0321848608	5.52606905684806E-05	0.0028447012
Contig138518	ref|XP_011700200.1| PREDICTED: hexosaminidase D-like isoform X1 [Wasmannia auropunctata]	0.7882292228	16.9741856574	4.1974625369	4.0439159393	5.25657725813908E-05	0.0027503253
Contig14814	ref|XP_011860200.1| PREDICTED: heat shock 70 kDa protein F, mitochondrial-like [Vollenhovia emeryi]	0.3153181322	16.9869951478	4.2020800599	4.0425205863	5.28796683169273E-05	0.0027632169
Contig32791	ref|XP_011703886.1| PREDICTED: metallophosphoesterase MPPED2 isoform X1 [Wasmannia auropunctata]	1.4497701429	16.9913982017	4.1921685323	4.0531286065	5.05372018603729E-05	0.0026844944
Contig115513	#N/A	0.289743337	17.0010300275	4.2038315541	4.0441748934	5.25077133750377E-05	0.0027498823
Contig39531	ref|XP_012522619.1| PREDICTED: uncharacterized protein LOC105828695 [Monomorium pharaonis]	0.2732363692	17.0042254766	4.1943356105	4.0540927231	5.03292520008496E-05	0.0026754599
Contig30598	#N/A	0.2814581932	17.0139367155	4.1913089958	4.0593372458	4.92121948855677E-05	0.0026309253
Contig34652	#N/A	0.1535815724	17.0209040673	4.1953679844	4.0570705908	4.96920662937612E-05	0.0026495622
Contig24850	ref|XP_012249055.1| PREDICTED: probable metal-nicotianamine transporter YSL7 [Bombus impatiens]	0.2707862826	17.039939587	4.2059566696	4.0513825808	5.09158758513436E-05	0.0026984609
Contig125173	ref|XP_011867141.1| PREDICTED: protein MAATS1-like [Vollenhovia emeryi]	0.1429140547	17.0419664821	4.197140577	4.0603754316	4.89938713812991E-05	0.002629452
Contig130021	#N/A	0.1429140547	17.0419664821	4.197140577	4.0603754316	4.89938713812991E-05	0.002629452
Contig130030	#N/A	0.1429140547	17.0419664821	4.197140577	4.0603754316	4.89938713812991E-05	0.002629452
Contig146935	#N/A	0.1429140547	17.0419664821	4.197140577	4.0603754316	4.89938713812991E-05	0.002629452
Contig43942	ref|XP_011637353.1| PREDICTED: protein enhancer of sevenless 2B isoform X2 [Pogonomyrmex barbatus]	1.4545951915	17.0431307513	4.1892118657	4.0683382216	4.73496184238451E-05	0.002568276
Contig109836	#N/A	0.176999002	17.0483646836	4.1945557158	4.0644029639	4.81555675994391E-05	0.0026010081
Contig59163	#N/A	8.6499322417	17.0554889304	4.1997027502	4.0611181183	4.88382530572531E-05	0.0026278365
Contig91384	ref|XP_009058260.1| hypothetical protein LOTGIDRAFT_217535 [Lottia gigantea]	0.2806196618	17.0683294155	4.2020808749	4.0618755145	0.00004868	0.0026233192
Contig100481	#N/A	0.1905936053	17.0730174733	4.1973618236	4.0675591457	4.75081524895883E-05	0.0025758862
Contig32779	#N/A	0.4112090761	17.0771681183	4.1800764231	4.0853722253	4.40062123240041E-05	0.0024166132
Contig17305	#N/A	0.3052894338	17.0803595477	4.1876762051	4.0787202045	4.5284297295811E-05	0.0024733418
Contig108727	ref|XP_011632422.1| PREDICTED: LOW QUALITY PROTEIN: uncharacterized protein LOC105424077 [Pogonomyrmex barbatus]	0.1832920643	17.1022809905	4.1921422143	4.0796042014	4.51124449106785E-05	0.0024666119
Contig130957	ref|XP_011645260.1| PREDICTED: fatty acid hydroxylase domain-containing protein 2 isoform X2 [Pogonomyrmex barbatus]	0.3796864627	17.1158142741	4.1800223514	4.094670515	4.22769175846778E-05	0.002340753
Contig138436	ref|XP_013786731.1| PREDICTED: ADP,ATP carrier protein-like, partial [Limulus polyphemus]	0.3476078208	17.1173895308	4.2011267366	4.0744758738	4.61180937197487E-05	0.0025109348
Contig95903	ref|XP_011157055.1| PREDICTED: uncharacterized protein LOC105194040 [Solenopsis invicta]	0.8198683466	17.1210525484	4.2059566696	4.0706678393	4.68785518369692E-05	0.0025466354
Contig37202	#N/A	0.2403773867	17.1476390259	4.2020761683	4.0807539747	4.48898498617395E-05	0.0024565457
Contig146983	ref|XP_011879211.1| PREDICTED: sulfatase-modifying factor 1 [Vollenhovia emeryi]	1.9514919937	17.156466328	4.1983885531	4.086440812	4.38041167193291E-05	0.0024073863
Contig139814	ref|XP_011630143.1| PREDICTED: spondin-1-like [Pogonomyrmex barbatus]	0.3453461691	17.1800207175	4.1768132225	4.1131886446	3.90231242094922E-05	0.0022011379
Contig5234	ref|XP_011705448.1| PREDICTED: protein spire homolog 1-like isoform X3 [Wasmannia auropunctata]	0.7681916947	17.1813188918	4.2059566697	4.0849966467	4.40774531216222E-05	0.002419585
Contig72210	#N/A	0.1610486699	17.1876130418	4.1968482588	4.0953620388	4.21509174752681E-05	0.0023365234
Contig143177	ref|XP_011166653.1| PREDICTED: uncharacterized protein LOC105200686 isoform X1 [Solenopsis invicta]	0.5117642889	17.2011448775	4.1835398379	4.111624496	3.92884924891526E-05	0.0022112121
Contig55687	#N/A	0.2927172735	17.2091287947	4.205232013	4.0923137514	0.000042709	0.0023609769
Contig141556	ref|XP_012233460.1| PREDICTED: LOW QUALITY PROTEIN: protein unc-45 homolog B [Linepithema humile]	0.502422296	17.2360406965	4.1902529785	4.1133651798	3.89932808990047E-05	0.0022007602
Contig96842	#N/A	0.4109564557	17.2458731645	4.1959069487	4.1101657818	3.95375158039453E-05	0.0022221688
Contig105004	ref|XP_011687399.1| PREDICTED: DENN domain-containing protein 1B [Wasmannia auropunctata]	1.9093197295	17.2473577206	4.1997063871	4.1068008405	4.01176849309272E-05	0.0022458433
Contig41793	#N/A	0.3902461963	17.252729249	4.184843295	4.1226703206	3.74505511257379E-05	0.0021380406
Contig86653	ref|XP_012152707.1| PREDICTED: uncharacterized protein LOC105664123 isoform X6 [Megachile rotundata]	0.3122896728	17.2744051075	4.200692384	4.1122756746	3.91778082496347E-05	0.0022075103
Contig65575	#N/A	0.4097577654	17.2751403896	4.1994221687	4.1136946217	3.89376465951246E-05	0.0021996214
Contig33024	#N/A	0.2978783583	17.2820325627	4.2020753633	4.1127374139	3.90995034014656E-05	0.0022045661
Contig131407	#N/A	0.1613697193	17.2847961356	4.1928214863	4.1224736593	3.74825482859909E-05	0.0021386381
Contig134545	#N/A	0.4510129042	17.292942158	4.1974689093	4.1198499695	3.79119178854918E-05	0.002154803
Contig116034	#N/A	0.1748413781	17.2947313611	4.1922433931	4.1254120383	3.70071605734379E-05	0.0021256101
Contig75028	ref|XP_014292615.1| PREDICTED: glycogen phosphorylase [Halyomorpha halys]	0.4269406034	17.2994779539	4.2006926899	4.1182441162	0.000038177	0.002165515
Contig149666	ref|XP_011645830.1| PREDICTED: vitellogenin receptor-like [Pogonomyrmex barbatus]	1.5163666173	17.306471095	3.4117477562	5.0726115562	3.92392961494169E-07	7.33701956967263E-05
Contig79661	ref|XP_011168829.1| PREDICTED: uncharacterized protein LOC105202139 [Solenopsis invicta]	1.2908010717	17.3070533468	4.1914508917	4.1291318434	3.64135562947404E-05	0.0021041925
Contig56476	ref|XP_006616616.1| PREDICTED: protein FAM50 homolog [Apis dorsata]	0.409881022	17.3123854611	4.1947107655	4.1271940854	3.67216452776514E-05	0.0021126459
Contig114745	#N/A	0.2610119078	17.3127673732	4.2006920963	4.1214083242	3.76563318379869E-05	0.0021454543
Contig126359	ref|XP_011858445.1| PREDICTED: uncharacterized protein LOC105555999 [Vollenhovia emeryi]	0.1733800991	17.3283291966	4.1972872293	4.1284592286	3.65202178521171E-05	0.0021053436
Contig127188	ref|XP_015597000.1| PREDICTED: uncharacterized protein LOC107268591 [Cephus cinctus]	0.1733800991	17.3283291966	4.1972872293	4.1284592286	3.65202178521171E-05	0.0021053436
Contig140238	ref|XP_011859754.1| PREDICTED: probable DNA-directed RNA polymerase III subunit RPC6 [Vollenhovia emeryi]	1.91513743	17.3310304564	4.189184546	4.137089275	3.51739284623624E-05	0.0020488396
Contig144516	#N/A	0.323456387	17.344833595	4.1933722772	4.136249407	3.53028485226902E-05	0.0020535968
Contig136064	ref|XP_014246261.1| PREDICTED: retrovirus-related Pol polyprotein from transposon TNT 1-94 [Cimex lectularius]	0.4947277245	17.3718575505	4.1856043857	4.1503821073	3.31920696503124E-05	0.0019582212
Contig29733	ref|XP_011168815.1| PREDICTED: uncharacterized protein LOC105202124 [Solenopsis invicta]	1.207641206	17.385209576	2.6236383484	6.6263742435	3.44032297867878E-11	0.00000003
Contig123711	#N/A	0.1749883621	17.3958099292	4.1943879717	4.1474012529	0.000033627	0.001976456
Contig15383	#N/A	0.1749883621	17.3958099292	4.1943879717	4.1474012529	0.000033627	0.001976456
Contig58669	#N/A	0.2248025489	17.3979600287	4.1939868389	4.1483105925	3.3493779156331E-05	0.0019727263
Contig86737	#N/A	0.2044929811	17.3981411174	4.1947611869	4.1475879894	3.3599635473558E-05	0.001976456
Contig21790	ref|XP_012529462.1| PREDICTED: calcium/calmodulin-dependent 3',5'-cyclic nucleotide phosphodiesterase 1A-like isoform X6 [Monomorium pharaonis]	3.5933959928	17.4144073984	4.191616584	4.1545802316	3.25885255969091E-05	0.0019338022
Contig117391	#N/A	0.156443486	17.4272886552	4.1930291991	4.1562526345	0.000032351	0.0019222458
Contig131231	#N/A	0.156443486	17.4272886552	4.1930291991	4.1562526345	0.000032351	0.0019222458
Contig148703	#N/A	0.156443486	17.4272886552	4.1930291991	4.1562526345	0.000032351	0.0019222458
Contig48853	#N/A	0.2553132242	17.4294015722	4.2006948931	4.1491710337	3.33681436912355E-05	0.0019661462
Contig111551	#N/A	0.1358916547	17.4341996194	4.1965605377	4.1544020306	3.26139314064527E-05	0.0019338022
Contig129979	#N/A	0.1358916547	17.4341996194	4.1965605377	4.1544020306	3.26139314064527E-05	0.0019338022
Contig137922	#N/A	0.174801951	17.4525855361	4.1974087325	4.1579428282	3.21126362361635E-05	0.001911297
Contig27272	#N/A	0.3483152255	17.4541244739	4.1865881842	4.169056928	3.05862592686436E-05	0.0018453231
Contig138426	ref|XP_011687010.1| PREDICTED: uncharacterized protein LOC105449455 [Wasmannia auropunctata]	0.2884752547	17.4605697716	4.1872516363	4.1699356257	3.04685690672358E-05	0.0018413676
Contig137705	#N/A	0.5750265744	17.4697799467	4.1888677672	4.1705255257	3.03898011554467E-05	0.0018381797
Contig143371	#N/A	0.2139836007	17.4781585837	4.191592617	4.1698132859	3.04849290648159E-05	0.0018415686
Contig102314	#N/A	0.1511822245	17.4932118588	4.193028833	4.1719750938	3.01970650837604E-05	0.001831469
Contig128628	#N/A	0.1511822245	17.4932118588	4.193028833	4.1719750938	3.01970650837604E-05	0.001831469
Contig146932	#N/A	0.1511822245	17.4932118588	4.193028833	4.1719750938	3.01970650837604E-05	0.001831469
Contig148679	#N/A	0.1511822245	17.4932118588	4.193028833	4.1719750938	3.01970650837604E-05	0.001831469
Contig32799	#N/A	0.1904084801	17.5003970792	4.2021668377	4.1646126285	3.11881638348348E-05	0.0018688694
Contig63286	#N/A	0.3126762391	17.500421071	4.2059566696	4.1608657544	3.17043419477458E-05	0.0018909786
Contig137470	ref|XP_011881749.1| PREDICTED: lymphokine-activated killer T-cell-originated protein kinase [Vollenhovia emeryi]	0.4858227896	17.5153555492	4.0134648829	4.3641482012	1.27619041598613E-05	0.0010239743
Contig121681	ref|XP_011866858.1| PREDICTED: luc7-like protein 3 [Vollenhovia emeryi]	2.6400887522	17.5244772804	4.1934563112	4.1790055696	2.92786516286866E-05	0.0017924548
Contig82902	ref|XP_011054731.1| PREDICTED: coiled-coil domain-containing protein 103-like [Acromyrmex echinatior]	0.2188522786	17.5270357221	4.1910180724	4.1820472781	2.88895874415663E-05	0.0017732459
Contig96418	#N/A	0.4789316316	17.5303142033	4.2020761388	4.1718221242	3.02173491224128E-05	0.0018316691
Contig53880	ref|XP_011883598.1| PREDICTED: uncharacterized protein LOC105570767 isoform X3 [Vollenhovia emeryi]	1.1390841693	17.5349002103	4.1918177623	4.1831256044	2.8752842777453E-05	0.0017672351
Contig30996	#N/A	0.4181990749	17.5357070166	4.1989354974	4.1762268145	2.96384302869243E-05	0.001808213
Contig124448	ref|XP_011878179.1| PREDICTED: uncharacterized protein LOC105567709 [Vollenhovia emeryi]	0.3892417044	17.5440044999	4.1891451967	4.1879676345	2.81463643395158E-05	0.0017397187
Contig42323	#N/A	1.9090849813	17.5484616817	4.1913136702	4.1868643252	2.82834776756029E-05	0.0017428568
Contig98405	ref|XP_011703661.1| PREDICTED: folliculin isoform X1 [Wasmannia auropunctata]	2.6532768141	17.5564053048	3.3889010051	5.1805600926	2.21220644850247E-07	4.67931339152775E-05
Contig143486	#N/A	0.1898040818	17.5574238552	4.1981764187	4.1821548463	2.8875918796651E-05	0.0017731772
Contig129788	ref|XP_011871726.1| PREDICTED: cytochrome P450 4c21-like [Vollenhovia emeryi]	0.2144861315	17.5839664898	4.1909568929	4.1956925206	2.7203909700431E-05	0.0016963066
Contig145649	ref|XP_011634443.1| PREDICTED: LOW QUALITY PROTEIN: uncharacterized protein LOC105425401 [Pogonomyrmex barbatus]	0.1964418351	17.6022602976	4.1950614783	4.1959481139	2.71732454537447E-05	0.0016958914
Contig92954	#N/A	0.1492773995	17.6028157062	4.1973367917	4.1938058773	2.74312755712866E-05	0.0017089757
Contig130945	ref|XP_011693383.1| PREDICTED: tyrosine aminotransferase isoform X3 [Wasmannia auropunctata]	1.7383558303	17.6132188697	4.1915232074	4.2021045806	2.64444906229692E-05	0.0016584675
Contig116891	#N/A	0.2037617931	17.6187734725	4.186668562	4.2083038606	2.57294725676296E-05	0.0016208191
Contig65976	ref|XP_011873888.1| PREDICTED: thyrotropin-releasing hormone receptor-like isoform X2 [Vollenhovia emeryi]	2.5577245201	17.6308408558	4.1993022461	4.1985167588	2.68668973049921E-05	0.0016789969
Contig95900	ref|XP_011168859.1| PREDICTED: uncharacterized protein LOC105202166 [Solenopsis invicta]	0.5115962013	17.6491641706	4.2000043269	4.2021776162	0.000026436	0.0016584675
Contig99246	#N/A	0.2482953218	17.6541664433	4.1866182231	4.2168082931	2.47784452137846E-05	0.0015770811
Contig127198	#N/A	0.1593966606	17.6602790111	4.1953711106	4.2094676599	2.55973076649833E-05	0.0016153742
Contig131627	#N/A	0.1593966606	17.6602790111	4.1953711106	4.2094676599	2.55973076649833E-05	0.0016153742
Contig118689	#N/A	0.1719777198	17.6755319769	4.1926924497	4.2157950264	0.00002489	0.0015820418
Contig138013	#N/A	0.2599286931	17.678394818	4.1888058	4.220390169	0.000024388	0.0015620803
Contig149155	#N/A	0.2819120373	17.6829790302	4.1933507011	4.2169091714	2.47673675674451E-05	0.0015770811
Contig144362	#N/A	0.2723738761	17.6884345991	4.1856756428	4.2259448912	0.000023794	0.0015422128
Contig150217	#N/A	0.5786215633	17.7050056457	4.1764953021	4.2392016188	2.24316128154259E-05	0.0014735098
Contig120457	ref|XP_011704965.1| PREDICTED: LOW QUALITY PROTEIN: cardioacceleratory peptide receptor, partial [Wasmannia auropunctata]	0.3230958122	17.7080582086	4.1850854547	4.2312297802	2.3241709171521E-05	0.0015140543
Contig24852	#N/A	0.3794538074	17.7151373793	4.2006926973	4.2171943191	2.47360803743124E-05	0.0015765151
Contig127403	#N/A	0.2879557558	17.7264017503	4.2006978326	4.2198707112	2.44442462526732E-05	0.0015642657
Contig47242	#N/A	0.2546963002	17.7290976622	4.1943202497	4.2269298972	2.36901433364208E-05	0.0015382758
Contig105033	ref|XP_011057618.1| PREDICTED: nuclear pore complex protein Nup155 isoform X1 [Acromyrmex echinatior]	0.2525462508	17.7330919121	4.186724056	4.235553066	0.000022799	0.0014907118
Contig118373	ref|XP_012215186.1| PREDICTED: protein sprint isoform X1 [Linepithema humile]	0.2052144093	17.7338917961	4.1917982473	4.2306167306	2.33051466130213E-05	0.0015167883
Contig67834	ref|XP_011562943.1| PREDICTED: protein lin-52 homolog [Plutella xylostella]	0.227212063	17.7365168551	4.1882674594	4.2348099845	2.2874504473113E-05	0.0014947152
Contig61687	ref|XP_012530338.1| PREDICTED: loss of heterozygosity 12 chromosomal region 1 protein homolog [Monomorium pharaonis]	2.3478689539	17.7581486296	4.1919969576	4.2362026521	2.27331621577756E-05	0.0014877849
Contig125790	ref|XP_011695977.1| PREDICTED: zinc finger SWIM domain-containing protein 8 [Wasmannia auropunctata]	15.2909777011	17.7584775104	4.1794206574	4.2490285057	0.00002147	0.0014318343
Contig75734	#N/A	0.192928673	17.7904276438	4.1883435432	4.247604682	2.16068215048861E-05	0.001436768
Contig142729	#N/A	0.231797765	17.7998747058	4.1891342962	4.2490580266	2.14671310963556E-05	0.0014318343
Contig119322	#N/A	0.2332779268	17.8011650863	4.1901268413	4.2483594794	2.15341653696646E-05	0.0014341885
Contig103021	#N/A	0.2312409448	17.8077802829	4.1857043473	4.2544285992	2.09583521411587E-05	0.0014054828
Contig85411	#N/A	0.7474555129	17.8101631894	4.1922910079	4.2483127139	2.15386602086115E-05	0.0014341885
Contig49832	ref|XP_011684806.1| PREDICTED: anoctamin-4 [Wasmannia auropunctata]	0.4224885467	17.8185023968	4.1849296804	4.2577782084	2.0646863520479E-05	0.0013911969
Contig134555	#N/A	0.2216439723	17.8207143896	4.1920093921	4.2511150913	2.12708820696112E-05	0.0014210458
Contig69849	ref|XP_003723356.2| PREDICTED: bis(5'-adenosyl)-triphosphatase [Strongylocentrotus purpuratus]	0.6353505201	17.8216941292	4.2021312493	4.2411083976	2.22418680443946E-05	0.0014644498
Contig136424	ref|XP_015185985.1| PREDICTED: uncharacterized protein LOC107071468 [Polistes dominula]	0.5227532555	17.8250138721	4.198712023	4.2453528069	0.000021825	0.0014464369
Contig122011	#N/A	0.252864342	17.8286900985	4.1887163541	4.2563612791	2.07780856253702E-05	0.0013964883
Contig124804	#N/A	0.2320643558	17.8312012938	4.200693161	4.2448235589	2.18765490478189E-05	0.0014491752
Contig102912	ref|XP_011878979.1| PREDICTED: intraflagellar transport protein 88 homolog [Vollenhovia emeryi]	0.4100779442	17.835530309	4.1863108719	4.2604409598	2.0402397339831E-05	0.0013813117
Contig83037	ref|XP_011864300.1| PREDICTED: short-chain dehydrogenase/reductase family 16C member 6 isoform X1 [Vollenhovia emeryi]	0.1880636625	17.8454803739	4.1926912781	4.2563306455	2.07809313590895E-05	0.0013964883
Contig122550	#N/A	0.4026081204	17.8470449607	4.1850899494	4.2644352156	2.0040847942094E-05	0.0013633662
Contig38715	ref|XP_012529148.1| PREDICTED: uncharacterized protein LOC105832595 isoform X3 [Monomorium pharaonis]	0.2500044957	17.8565755283	4.1938291359	4.2578214204	2.0642874072463E-05	0.0013911969
Contig138027	#N/A	0.2289783844	17.8591237411	4.1939371024	4.2583194037	0.000020597	0.0013911969
Contig118934	ref|XP_011695198.1| PREDICTED: actin-related protein 5 [Wasmannia auropunctata]	0.194679344	17.8678482197	4.1867354705	4.2677280057	1.97473894905885E-05	0.0013505799
Contig147642	#N/A	0.5774551247	17.8679012931	4.1928805087	4.2614859298	2.03072141395249E-05	0.0013781693
Contig33854	#N/A	0.2561095993	17.8750097631	4.1934892005	4.2625624888	2.02095958714987E-05	0.0013722034
Contig114756	#N/A	0.2300674258	17.8752376012	4.1882678561	4.2679308525	1.97294459365367E-05	0.0013505799
Contig52119	#N/A	0.2019344599	17.8822847157	4.1872949232	4.2706054968	1.94942978721599E-05	0.0013397305
Contig48662	ref|XP_011861886.1| PREDICTED: uncharacterized protein LOC105558678 [Vollenhovia emeryi]	0.2567898183	17.8828307283	4.1872482106	4.2707835382	1.94787400393952E-05	0.0013397305
Contig104533	#N/A	1.1042867111	17.8884374525	4.1839787042	4.275460923	1.90742256532956E-05	0.0013232748
Contig108846	ref|XP_011862971.1| PREDICTED: dual specificity protein phosphatase 10 isoform X1 [Vollenhovia emeryi]	0.4249964836	17.8921609202	4.184884556	4.2754252072	1.90772839277323E-05	0.0013232748
Contig21834	#N/A	1.3179917158	17.8935081997	4.1941850132	4.2662658284	1.98771922406181E-05	0.001355496
Contig131873	ref|XP_012059797.1| PREDICTED: LOW QUALITY PROTEIN: tubulin-specific chaperone C-like [Atta cephalotes]	0.2731489734	17.8937758047	4.1856779436	4.2750006202	1.91136762709733E-05	0.0013238751
Contig2605	#N/A	0.2460545013	17.9031565207	4.1891220915	4.2737251695	1.92233961838635E-05	0.0013295194
Contig103438	#N/A	0.2140229688	17.9039581497	4.1864745009	4.2766194195	1.89752787454537E-05	0.0013194636
Contig47415	ref|XP_011876905.1| PREDICTED: coiled-coil domain-containing protein 132 [Vollenhovia emeryi]	0.8443095178	17.9043018547	4.1857942713	4.2773965213	1.89091808394826E-05	0.0013168115
Contig141339	#N/A	0.4893692868	17.9044735405	4.1954275789	4.2676159233	1.97573108126725E-05	0.0013505799
Contig137103	ref|XP_015793822.1| PREDICTED: uncharacterized protein LOC107370338, partial [Tetranychus urticae]	0.2853325092	17.9048404763	4.1861887265	4.2771221381	1.89324939461743E-05	0.0013177855
Contig114270	#N/A	0.2575530603	17.9139058546	4.1952299482	4.2700653065	1.9541573902696E-05	0.0013423266
Contig48342	#N/A	0.1662670088	17.9189969222	4.1968718411	4.2696078415	1.95816954006472E-05	0.001344429
Contig33358	ref|XP_011859957.1| PREDICTED: uncharacterized protein LOC105557351 [Vollenhovia emeryi]	0.3419451324	17.9263837293	4.1957213513	4.2725391484	0.000019326	0.0013346531
Contig140529	#N/A	0.2569943444	17.9367129403	4.1916394864	4.2791640356	1.87596571835099E-05	0.0013102735
Contig53721	#N/A	0.4144011766	17.943601005	4.1745257117	4.2983568061	1.72069009505017E-05	0.0012372034
Contig120623	ref|XP_011697662.1| PREDICTED: glutamine synthetase 2 cytoplasmic-like isoform X1 [Wasmannia auropunctata]	0.1880867009	17.9485439753	4.1972421083	4.2762708255	0.000019005	0.0013208803
Contig101215	ref|XP_011865960.1| PREDICTED: origin recognition complex subunit 3 [Vollenhovia emeryi]	0.123903926	17.950950887	4.192935675	4.2812368895	1.85857380132909E-05	0.0013001194
Contig10816	#N/A	0.8499830043	17.9592127793	4.2021048827	4.2738611436	1.9211670585235E-05	0.0013293592
Contig124631	#N/A	0.2034534977	17.9668816754	4.1920048985	4.2859877578	1.81929006650485E-05	0.0012789066
Contig42702	ref|XP_012060468.1| PREDICTED: uncharacterized protein LOC105623697 [Atta cephalotes]	3.5478710491	17.9681806379	4.1904924464	4.287844655	1.80415191348755E-05	0.0012720621
Contig124754	#N/A	0.3128552331	17.9787567475	4.186646034	4.2943101952	1.75237324406903E-05	0.0012511626
Contig107189	ref|XP_011877260.1| PREDICTED: LOW QUALITY PROTEIN: uncharacterized aarF domain-containing protein kinase 5 [Vollenhovia emeryi]	1.1651223242	17.9815834673	4.1908756936	4.2906506378	0.000017815	0.0012611281
Contig139688	#N/A	0.1695067425	17.9857497896	4.1930357283	4.289433946	1.79129077261551E-05	0.0012651135
Contig89865	ref|XP_015594195.1| PREDICTED: uncharacterized protein LOC107267252 [Cephus cinctus]	0.2315781836	17.999759606	4.193335957	4.2924678086	1.76698174812478E-05	0.0012536128
Contig103459	#N/A	0.1500449784	18.0035600583	4.193375954	4.2933331654	1.76010583827021E-05	0.0012516239
Contig119364	#N/A	0.1500449784	18.0035600583	4.193375954	4.2933331654	1.76010583827021E-05	0.0012516239
Contig132838	#N/A	0.1500449784	18.0035600583	4.193375954	4.2933331654	1.76010583827021E-05	0.0012516239
Contig131540	#N/A	0.207340884	18.0039774423	4.1998795151	4.2867842703	1.81278182297327E-05	0.0012756008
Contig71881	#N/A	0.7682827698	18.0042103671	4.1943016193	4.29254069	0.000017664	0.0012536128
Contig149873	#N/A	0.2673450561	18.0050638459	4.1885471921	4.2986417533	1.71847978020333E-05	0.0012363342
Contig144907	ref|XP_011865507.1| PREDICTED: leucine-rich repeat-containing protein 48-like [Vollenhovia emeryi]	0.233810006	18.0054363439	4.1915622662	4.2956385234	1.74191224279195E-05	0.0012468438
Contig37677	ref|XP_011876001.1| PREDICTED: SWI/SNF-related matrix-associated actin-dependent regulator of chromatin subfamily A-like protein 1 [Vollenhovia emeryi]	1.7118854466	18.0069159143	4.19101552	4.2965519522	1.73475326108379E-05	0.0012429789
Contig104446	#N/A	0.38592101	18.0087864149	4.1816769226	4.3065943994	1.65787196724923E-05	0.0012043822
Contig44321	#N/A	0.3771018614	18.0160091892	4.1822491271	4.3077321894	1.64936917084723E-05	0.0012008936
Contig100933	#N/A	0.203644037	18.01787257	4.1920088153	4.2981475861	1.72231472380996E-05	0.0012372034
Contig103545	ref|XP_011633602.1| PREDICTED: zinc finger protein 239-like [Pogonomyrmex barbatus]	0.373900204	18.0231544175	4.1863549952	4.3052140676	1.66824338499541E-05	0.0012106717
Contig133002	#N/A	0.2149364903	18.0231913308	4.1871412855	4.3044144207	1.67427995991637E-05	0.0012138057
Contig109118	ref|XP_011882433.1| PREDICTED: uncharacterized protein LOC105570082, partial [Vollenhovia emeryi]	0.2647934892	18.0270392243	4.1830086978	4.3095868373	0.000016356	0.0011961963
Contig129525	#N/A	0.2021684799	18.0328228865	4.1941811196	4.2994859717	1.71194711166627E-05	0.0012328899
Contig130660	#N/A	0.2745666494	18.0347320429	4.1859794822	4.3083660872	1.64465004716198E-05	0.0011990925
Contig121519	#N/A	0.2061176021	18.0350597476	4.1980635168	4.29604261	1.73874175642458E-05	0.0012452052
Contig122358	ref|XP_011879068.1| PREDICTED: aminopeptidase N-like [Vollenhovia emeryi]	0.5975665273	18.0373371389	4.2007477669	4.2938396066	1.75609361577754E-05	0.0012516239
Contig139812	#N/A	0.1695468011	18.0386742386	4.1928241299	4.3022730455	1.6905479931521E-05	0.0012224635
Contig45179	#N/A	0.641739807	18.041256628	4.2020788819	4.2934121741	1.75947932623681E-05	0.0012516239
Contig128497	#N/A	0.1971931823	18.0425129087	4.1928245794	4.3031881174	1.68357784231252E-05	0.0012192952
Contig112806	#N/A	0.2516806065	18.0556750763	4.191664765	4.3075188711	1.65096014378681E-05	0.0012012138
Contig110543	ref|XP_012058490.1| PREDICTED: multidrug resistance-associated protein 4-like [Atta cephalotes]	0.2432339348	18.0581176603	4.1972451351	4.3023738378	1.68977890731401E-05	0.0012224635
Contig133930	ref|XP_011881589.1| PREDICTED: 60S acidic ribosomal protein P2 [Vollenhovia emeryi]	0.3600931751	18.0604669334	4.1858743363	4.3146223423	1.59875976455955E-05	0.0011777891
Contig14627	#N/A	0.2947116285	18.0637588952	4.18720646	4.3140358776	1.60300914692178E-05	0.0011790754
Contig43730	ref|XP_011631250.1| PREDICTED: cardioacceleratory peptide receptor [Pogonomyrmex barbatus]	0.6921041473	18.0656254742	4.1915616387	4.3099987621	1.63255459929002E-05	0.0011948848
Contig113695	ref|XP_011697057.1| PREDICTED: eukaryotic translation initiation factor 2-alpha kinase isoform X1 [Wasmannia auropunctata]	0.2511843863	18.0731556087	4.1866697852	4.3168333153	1.58283592929569E-05	0.001169106
Contig124407	#N/A	0.2697321073	18.0808947539	4.1853600879	4.3200332526	1.56005691156432E-05	0.00115712
Contig110660	#N/A	0.2206914832	18.0828120549	4.1862735829	4.3195485667	1.56348699033838E-05	0.0011582613
Contig108143	#N/A	0.1568308622	18.0970332584	4.1974011574	4.3114852691	1.62161579555564E-05	0.0011884307
Contig136952	#N/A	0.3358394434	18.1015138444	4.1858810751	4.3244214347	1.52932693099014E-05	0.0011391107
Contig113773	#N/A	0.2022216421	18.1075399985	4.1923513239	4.3191847723	1.56606625307976E-05	0.0011591433
Contig56501	ref|XP_014470891.1| PREDICTED: bifunctional glutamate/proline--tRNA ligase [Dinoponera quadriceps]	0.2797852702	18.1177951903	4.1936145889	4.3203291114	1.55796667202555E-05	0.0011561766
Contig40462	ref|YP_009158746.1| NADH dehydrogenase subunit 4L (mitochondrion) [Petrosia ficiformis]	0.693429282	18.1192099277	4.2059566697	4.307987778	1.64746486221761E-05	0.0012005252
Contig112078	ref|XP_015600431.1| PREDICTED: macoilin-2 isoform X6 [Cephus cinctus]	0.9284791081	18.1238963396	4.1725478637	4.3436041794	1.40163961740622E-05	0.0010772487
Contig72226	#N/A	0.3584027807	18.1252338877	4.18559612	4.3303829056	0.000014885	0.0011187286
Contig133777	#N/A	0.3724720218	18.1436708937	4.1851441052	4.3352559524	1.45590618941961E-05	0.0011042146
Contig144944	#N/A	0.1800816125	18.1493162585	4.1930311556	4.328447747	1.50163949228385E-05	0.0011252837
Contig106627	ref|XP_014776903.1| PREDICTED: adenosine deaminase CECR1-like [Octopus bimaculoides]	0.3915987406	18.1516716788	4.2020808038	4.3196864902	1.56251018668973E-05	0.0011582613
Contig144178	#N/A	0.2854369122	18.1519561208	4.185147806	4.3372317926	1.44288438443769E-05	0.0010965302
Contig126104	#N/A	0.2791628914	18.1581397275	4.1995791478	4.3237998591	1.5336444038766E-05	0.0011417247
Contig84591	ref|XP_011864763.1| PREDICTED: telomerase reverse transcriptase-like [Vollenhovia emeryi]	3.4590103138	18.1686354233	3.9230145406	4.6312944383	3.63386667036199E-06	0.0004364484
Contig130655	#N/A	0.4409694061	18.1707002151	4.1851345199	4.3417242931	1.41368861748988E-05	0.0010832427
Contig149470	#N/A	0.21380535	18.1871507196	4.191798096	4.3387468344	1.43297479184561E-05	0.0010913824
Contig119387	#N/A	0.3039030826	18.1890310016	4.1856922157	4.3455251997	1.38942819006063E-05	0.0010693071
Contig131009	#N/A	0.5560685544	18.1897769225	4.1703263146	4.361715499	1.29046604794086E-05	0.0010292431
Contig75851	#N/A	0.2977915349	18.1956493147	4.202081511	4.3301514421	1.49006830405222E-05	0.0011193098
Contig107129	#N/A	0.2368405689	18.1987369498	4.1866911838	4.346806619	1.38133903268375E-05	0.0010671354
Contig32029	#N/A	0.2704482649	18.1990210011	4.1857057433	4.3478978497	1.37448590321641E-05	0.0010641684
Contig136027	ref|XP_014300712.1| PREDICTED: transmembrane GTPase Marf [Microplitis demolitor]	0.2761487787	18.199537168	4.1872688049	4.3463980977	1.38391299673788E-05	0.0010673731
Contig100473	#N/A	0.1775919942	18.2002534034	4.1923473841	4.3413037461	0.000014164	0.0010836599
Contig99810	#N/A	0.1775919942	18.2002534034	4.1923473841	4.3413037461	0.000014164	0.0010836599
Contig28650	ref|XP_011053933.1| PREDICTED: uncharacterized protein LOC105145810 isoform X1 [Acromyrmex echinatior]	0.2944625263	18.2083350019	4.1844581991	4.3514199773	1.35258687491088E-05	0.0010519997
Contig117613	ref|XP_011170160.1| PREDICTED: UPF0553 protein C9orf64-like [Solenopsis invicta]	0.4685196821	18.2164248071	4.2020787469	4.3350983892	1.45694942271901E-05	0.001104413
Contig118376	#N/A	0.2803754364	18.2194968588	4.1935045492	4.3446946689	0.000013947	0.0010727612
Contig121177	ref|XP_011687748.1| PREDICTED: O-glucosyltransferase rumi homolog isoform X1 [Wasmannia auropunctata]	2.1593715094	18.2211344722	4.1986728294	4.339736677	1.42653551686448E-05	0.0010889529
Contig106093	#N/A	0.2334862078	18.2213445736	4.1950512466	4.3435332497	1.40209245270082E-05	0.0010772487
Contig51657	#N/A	0.2698747165	18.2337729028	4.1851856313	4.3567417336	1.32012881999674E-05	0.0010420684
Contig77559	ref|XP_011630234.1| PREDICTED: LOW QUALITY PROTEIN: uncharacterized protein LOC105422532 [Pogonomyrmex barbatus]	0.2726573081	18.2449975039	4.1936359593	4.3506393214	1.35741174724847E-05	0.0010549956
Contig99477	#N/A	0.2694082353	18.2470405766	4.1838854883	4.3612667286	1.29311612322191E-05	0.0010293714
Contig103333	#N/A	0.1420101818	18.2485743998	4.1933722163	4.3517659437	1.35045385266298E-05	0.0010519023
Contig112920	#N/A	0.1420101818	18.2485743998	4.1933722163	4.3517659437	1.35045385266298E-05	0.0010519023
Contig130585	#N/A	0.1420101818	18.2485743998	4.1933722163	4.3517659437	1.35045385266298E-05	0.0010519023
Contig133507	ref|XP_011866247.1| PREDICTED: transmembrane protein 26-like [Vollenhovia emeryi]	0.1420101818	18.2485743998	4.1933722163	4.3517659437	1.35045385266298E-05	0.0010519023
Contig135890	ref|XP_011049569.1| PREDICTED: uncharacterized protein LOC105143178 [Acromyrmex echinatior]	0.1420101818	18.2485743998	4.1933722163	4.3517659437	1.35045385266298E-05	0.0010519023
Contig148078	#N/A	0.1420101818	18.2485743998	4.1933722163	4.3517659437	1.35045385266298E-05	0.0010519023
Contig101942	ref|XP_011871807.1| PREDICTED: uncharacterized protein LOC105564200 [Vollenhovia emeryi]	0.2141665599	18.24862913	4.1920092031	4.3531939569	1.34168348360581E-05	0.0010519023
Contig51052	#N/A	0.2141665599	18.24862913	4.1920092031	4.3531939569	1.34168348360581E-05	0.0010519023
Contig42464	#N/A	0.2156238695	18.2507731012	4.192825129	4.352858166	1.34374089713042E-05	0.0010519023
Contig127259	ref|XP_011059565.1| PREDICTED: slowpoke-binding protein isoform X2 [Acromyrmex echinatior]	0.5610016132	18.2557204957	4.1839733746	4.3632496819	1.28144548642044E-05	0.0010259093
Contig114466	#N/A	0.1927571895	18.2566661507	4.1858491672	4.3615203085	1.29161804828594E-05	0.0010292431
Contig115458	ref|XP_011684796.1| PREDICTED: uncharacterized protein KIAA1109 isoform X2 [Wasmannia auropunctata]	1.6973351288	18.2578944856	3.6187545763	5.045353063	4.52684670486185E-07	8.22180941641012E-05
Contig138428	#N/A	0.2681476989	18.2614469749	4.2006922094	4.3472470879	1.37856889342258E-05	0.0010661612
Contig74860	ref|XP_011703752.1| PREDICTED: uncharacterized protein LOC105459432 [Wasmannia auropunctata]	0.3069405215	18.2630893628	4.1999989847	4.3483556613	1.37162042966686E-05	0.0010636984
Contig122930	#N/A	0.5662507589	18.264560884	4.171369558	4.3785525665	0.000011947	0.0009865326
Contig149190	ref|XP_011696169.1| PREDICTED: leukotriene A-4 hydrolase [Wasmannia auropunctata]	0.2295800107	18.2681319155	4.1920078556	4.3578477295	1.31347711968229E-05	0.0010391398
Contig28789	#N/A	0.2408634668	18.2699326319	4.1888658395	4.3615463785	1.29146412833869E-05	0.0010292431
Contig24853	ref|XP_011867884.1| PREDICTED: small G protein signaling modulator 3 homolog isoform X3 [Vollenhovia emeryi]	0.3243128346	18.2727708463	4.1993014784	4.3513834242	1.3528124271321E-05	0.0010519997
Contig58250	ref|XP_011861716.1| PREDICTED: synaptic vesicle 2-related protein isoform X2 [Vollenhovia emeryi]	1.7771257094	18.2851132077	4.1683574054	4.386647168	1.15111289572728E-05	0.0009612813
Contig94454	#N/A	0.2844373925	18.2864512632	4.1867251934	4.3677218873	1.25549221240237E-05	0.0010136988
Contig98840	#N/A	0.2648146235	18.2971056121	4.2020798378	4.3542974714	1.33494331966827E-05	0.0010496577
Contig123211	#N/A	0.2222649341	18.3099631058	4.2006059803	4.3588861206	1.30726112116769E-05	0.0010359623
Contig140797	ref|XP_011646024.1| PREDICTED: LOW QUALITY PROTEIN: trafficking protein particle complex subunit 11 [Pogonomyrmex barbatus]	0.3404395578	18.3138578222	4.1851511249	4.3759131452	1.20925162048578E-05	0.0009899301
Contig65443	#N/A	0.510924636	18.3194550073	4.1872584005	4.3750476457	1.21405957536233E-05	0.0009910051
Contig131603	#N/A	0.3163141149	18.3223367405	4.2006917328	4.3617427571	1.29030525081041E-05	0.0010292431
Contig124872	ref|XP_011869364.1| PREDICTED: post-GPI attachment to proteins factor 3 isoform X2 [Vollenhovia emeryi]	0.1643069518	18.3248365451	4.1928235295	4.3705241626	1.23948637125088E-05	0.001003643
Contig149669	ref|XP_011164921.1| PREDICTED: putative nuclease HARBI1 [Solenopsis invicta]	0.1643069518	18.3248365451	4.1928235295	4.3705241626	1.23948637125088E-05	0.001003643
Contig131785	#N/A	0.2895329016	18.3255985346	4.199998502	4.3632393026	1.28150631119862E-05	0.0010259093
Contig111218	#N/A	0.2295154348	18.3293315883	4.1867214282	4.3779677972	1.19791044633353E-05	0.0009865326
Contig131295	#N/A	0.3205778279	18.3499334818	4.1827247646	4.3870764907	1.14884396342938E-05	0.0009612813
Contig124367	#N/A	0.1800125165	18.3516739615	4.1926948182	4.3770593275	1.20291239912072E-05	0.0009871206
Contig138009	ref|XP_011867771.1| PREDICTED: LOW QUALITY PROTEIN: cationic amino acid transporter 3 [Vollenhovia emeryi]	0.1800125165	18.3516739615	4.1926948182	4.3770593275	1.20291239912072E-05	0.0009871206
Contig146454	#N/A	0.2697826604	18.3581133436	4.1863322857	4.3852499254	1.15852685043374E-05	0.0009651909
Contig110870	#N/A	0.1734001147	18.3597177186	4.1923462146	4.3793419672	1.19038209410282E-05	0.0009859169
Contig99144	#N/A	0.7079118093	18.3625268542	4.1945269656	4.3777348447	1.19919116622573E-05	0.0009868498
Contig111563	#N/A	0.1513893012	18.363894074	4.1940528916	4.3785556712	1.19468424977626E-05	0.0009865326
Contig46456	#N/A	0.6849010088	18.371741084	4.1841832954	4.3907591487	1.12955603566233E-05	0.0009503817
Contig120170	ref|XP_012273670.1| PREDICTED: mitochondrial amidoxime-reducing component 1-like [Orussus abietinus]	0.6803656024	18.3722224768	4.1858581971	4.3891172638	1.13811691028941E-05	0.000955511
Contig83557	ref|XP_012543357.1| PREDICTED: ATP-binding cassette sub-family E member 1 [Monomorium pharaonis]	1.3923876524	18.3748644931	4.1942683808	4.3809462879	1.18165000024883E-05	0.0009804087
Contig70703	#N/A	3.4502733388	18.3798135944	4.0867680135	4.4973958722	6.87908324439564E-06	0.0006937857
Contig120741	#N/A	0.4527462491	18.3806176311	4.1792237374	4.3980937098	1.0920582866148E-05	0.0009301058
Contig143099	#N/A	0.2346797251	18.3916309054	4.1916584987	4.3876739747	1.14569341705519E-05	0.0009607302
Contig115903	ref|XP_016842656.1| PREDICTED: uncharacterized protein LOC107981383 [Nasonia vitripennis]	0.2333331006	18.4051287973	4.1863533659	4.3964584899	1.10031391228835E-05	0.000935398
Contig149304	#N/A	0.3192540683	18.4079366752	4.1856766421	4.3978401222	1.09333467162572E-05	0.000930632
Contig144424	ref|XP_011553673.1| PREDICTED: uncharacterized protein LOC105385054 [Plutella xylostella]	0.2258930332	18.4079923837	4.1962504617	4.3867716075	1.15045480407162E-05	0.0009612813
Contig141428	ref|XP_012234502.1| PREDICTED: uncharacterized protein LOC105679183 isoform X2 [Linepithema humile]	0.2321859397	18.4201114302	4.1852075746	4.4012420177	1.07632988367886E-05	0.0009205943
Contig120687	#N/A	0.2281957317	18.420853367	4.1919056865	4.3943864067	1.11086071353573E-05	0.0009404511
Contig123696	ref|XP_011165431.1| PREDICTED: putative fatty acyl-CoA reductase CG5065 [Solenopsis invicta]	0.3137849178	18.4227218859	4.1915958354	4.3951570259	1.10692707685136E-05	0.0009392353
Contig145220	#N/A	0.254375961	18.4245309153	4.1999983958	4.3867947506	1.1503324531234E-05	0.0009612813
Contig143075	ref|XP_011866572.1| PREDICTED: coiled-coil domain-containing protein 103-like [Vollenhovia emeryi]	0.6473357961	18.4258367168	4.1926473673	4.3947976309	1.10875995645115E-05	0.0009392353
Contig100827	#N/A	0.2831573081	18.4303269035	4.1853223563	4.4035620997	1.06487783286775E-05	0.0009152314
Contig61050	ref|XP_011689473.1| PREDICTED: probable helicase with zinc finger domain [Wasmannia auropunctata]	0.643989873	18.4356361297	4.1848471626	4.4053308074	1.05622565219858E-05	0.0009111204
Contig139365	ref|XP_012223069.1| PREDICTED: mitogen-activated protein kinase 14A-like isoform X3 [Linepithema humile]	0.5601120246	18.4383753858	4.2059566697	4.3838719307	1.16588330162491E-05	0.0009696045
Contig84249	ref|XP_011700162.1| PREDICTED: synaptic vesicle glycoprotein 2B-like isoform X2 [Wasmannia auropunctata]	13.9808678334	18.4422687617	4.1839734153	4.4078360284	1.04408539275929E-05	0.0009039592
Contig56280	#N/A	0.6467230311	18.4486307982	4.2059566696	4.3863102374	0.000011529	0.0009616341
Contig102567	#N/A	0.3556787395	18.4522274594	4.185661683	4.4084373886	1.04119110642836E-05	0.000902193
Contig119915	ref|XP_011170369.1| PREDICTED: uncharacterized protein LOC105203292 [Solenopsis invicta]	0.7240727361	18.4610638643	4.1836201235	4.4127007997	1.02089035728635E-05	0.0008909743
Contig121471	#N/A	0.3310849863	18.4704036335	4.1995786237	4.3981564077	1.09174292825849E-05	0.0009301058
Contig124635	#N/A	0.1539550995	18.4742096793	4.1930281525	4.4059350444	1.05328525444552E-05	0.000909139
Contig38867	#N/A	0.7813178881	18.4789578255	4.1856179334	4.4148697085	1.01070845540896E-05	0.0008853693
Contig65521	#N/A	0.6860630988	18.4818454848	3.7892007736	4.8775049382	1.07436159385629E-06	0.0001664518
Contig107437	ref|XP_011860942.1| PREDICTED: exonuclease 1 isoform X2 [Vollenhovia emeryi]	0.4651893098	18.4821911551	4.1841247485	4.4172180004	9.99793816412594E-06	0.0008785315
Contig102673	#N/A	0.185181327	18.4903012253	4.192685321	4.4101333178	1.03306998331544E-05	0.0008971708
Contig88024	#N/A	0.3267141401	18.4944800454	4.1852150904	4.4190034791	9.91570514167136E-06	0.0008745689
Contig58861	#N/A	0.2783972024	18.4994905675	4.1920008794	4.4130454882	1.01926570220273E-05	0.0008906567
Contig118563	#N/A	0.2896688259	18.5054731074	4.1962997095	4.4099502868	1.03394352436983E-05	0.0008973779
Contig26659	#N/A	0.3117731248	18.5068290642	4.1831207907	4.4241679813	9.68146698567135E-06	0.0008652513
Contig84746	ref|XP_011052525.1| PREDICTED: activating signal cointegrator 1 complex subunit 1 isoform X2 [Acromyrmex echinatior]	2.1356040157	18.5130018615	4.1968475	4.4111685882	1.02814226184138E-05	0.0008948244
Contig61428	#N/A	0.3095660447	18.5151091638	4.1935618771	4.4151272132	1.00950606564564E-05	0.0008848646
Contig123110	ref|XP_011861118.1| PREDICTED: uncharacterized protein LOC105558172 [Vollenhovia emeryi]	3.4975134815	18.5167801206	3.5324332668	5.2419334554	1.58902680895223E-07	3.60392810633265E-05
Contig141690	#N/A	0.2214366842	18.5249241061	4.1920014038	4.4191120951	9.91072356458644E-06	0.0008745689
Contig97390	ref|XP_011172194.1| PREDICTED: cholesterol desaturase daf-36 [Solenopsis invicta]	1.5641037143	18.5318832969	4.1912131351	4.4216036502	9.79710474248202E-06	0.0008691052
Contig133683	#N/A	0.1693685504	18.5387305309	4.1930289098	4.4213218964	9.80989048870657E-06	0.0008691052
Contig141216	#N/A	0.1693685504	18.5387305309	4.1930289098	4.4213218964	9.80989048870657E-06	0.0008691052
Contig144065	ref|XP_011865072.1| PREDICTED: uncharacterized protein LOC105560510 isoform X1 [Vollenhovia emeryi]	0.1693685504	18.5387305309	4.1930289098	4.4213218964	9.80989048870657E-06	0.0008691052
Contig41270	ref|XP_011694174.1| PREDICTED: UDP-glucuronosyltransferase-like [Wasmannia auropunctata]	1.0033640983	18.5403437443	4.1699017476	4.446230359	0.000008739	0.0008102348
Contig26482	ref|XP_011687036.1| PREDICTED: uncharacterized protein LOC105449477 [Wasmannia auropunctata]	0.4373366008	18.5426780821	4.1881551385	4.427409556	9.53715414621704E-06	0.0008585873
Contig132486	ref|XP_012532616.1| PREDICTED: uncharacterized protein LOC105834579 isoform X2 [Monomorium pharaonis]	3.2672799788	18.5465370203	4.1829878341	4.4338013296	9.25859499888789E-06	0.000841911
Contig128609	#N/A	0.2871399939	18.5506739971	4.2059566697	4.410571828	1.03097999757489E-05	0.0008959064
Contig7032	#N/A	0.5142994282	18.5509331252	4.1925666153	4.4247199454	9.65674742486701E-06	0.0008645613
Contig60886	#N/A	0.1896152734	18.5534734072	4.1933711436	4.4244768163	9.66762845623863E-06	0.0008645613
Contig94488	#N/A	0.1896152734	18.5534734072	4.1933711436	4.4244768163	9.66762845623863E-06	0.0008645613
Contig45983	ref|XP_012539824.1| PREDICTED: dual specificity tyrosine-phosphorylation-regulated kinase 4 isoform X3 [Monomorium pharaonis]	0.4140350689	18.5542459732	4.1843333463	4.4342179358	9.24071138719149E-06	0.0008412918
Contig67188	ref|XP_016917701.1| PREDICTED: mitochondrial glutamate carrier 1-like [Apis cerana]	0.273796506	18.5580266022	4.1828003804	4.4367468955	9.13285721272471E-06	0.0008352397
Contig91414	ref|XP_011869415.1| PREDICTED: uncharacterized protein LOC105562881 [Vollenhovia emeryi]	0.3187237	18.5599594747	4.1930988702	4.4263109574	9.5858312898753E-06	0.0008605141
Contig137664	ref|XP_012057068.1| PREDICTED: outer dense fiber protein 3-like [Atta cephalotes]	0.4871171023	18.5623667884	4.1812036288	4.4394792592	9.0176804246842E-06	0.0008284598
Contig113346	ref|XP_011697826.1| PREDICTED: excitatory amino acid transporter 3 [Wasmannia auropunctata]	0.5410007566	18.5681798654	4.1914718321	4.4299903731	9.42372949570956E-06	0.0008530075
Contig25793	ref|XP_011877542.1| PREDICTED: uncharacterized protein LOC105567343 [Vollenhovia emeryi]	0.4926301299	18.5744294737	4.1993002363	4.4232201625	9.72405587248547E-06	0.0008658872
Contig15554	ref|XP_003690167.2| PREDICTED: broad-complex core protein isoforms 1/2/3/4/5-like [Apis florea]	0.4537404222	18.5755995786	4.178401916	4.4456229803	8.76375285829088E-06	0.0008111094
Contig69949	ref|XP_011176269.1| PREDICTED: uncharacterized protein LOC105208185 [Solenopsis invicta]	1.9124362389	18.5805268359	4.1926168566	4.4317254525	9.34819995888815E-06	0.0008478001
Contig110341	ref|XP_011165057.1| PREDICTED: uncharacterized protein LOC105199598 [Solenopsis invicta]	1.3886869282	18.5843676617	4.1916824563	4.4336296595	0.000009266	0.0008419642
Contig144214	#N/A	0.3755656798	18.5877020912	4.1805125224	4.4462735111	8.73726927452474E-06	0.0008102348
Contig142475	ref|XP_011704371.1| PREDICTED: probable RNA-binding protein CG14230 [Wasmannia auropunctata]	0.3697640864	18.6115162066	4.199997973	4.4313155211	0.000009366	0.0008483248
Contig32391	#N/A	0.2663808606	18.626900708	4.199997037	4.4349794878	9.20810559321401E-06	0.0008388638
Contig114721	#N/A	0.4238955283	18.6279817088	4.1999961498	4.435237806	9.19707070618824E-06	0.0008388638
Contig150075	ref|XP_011704647.1| PREDICTED: rab3 GTPase-activating protein non-catalytic subunit [Wasmannia auropunctata]	0.1839226376	18.6367976227	4.1923450666	4.4454350314	8.77141866754394E-06	0.0008111094
Contig134918	ref|XP_011868878.1| PREDICTED: coiled-coil domain-containing protein 40 [Vollenhovia emeryi]	0.5214611171	18.6445608913	4.1931566343	4.4464260502	8.73107037523841E-06	0.0008102348
Contig149659	ref|XP_011645830.1| PREDICTED: vitellogenin receptor-like [Pogonomyrmex barbatus]	0.3359500593	18.6567637574	4.1921516934	4.4504028294	8.57093680066708E-06	0.0007988441
Contig115575	#N/A	0.3311262604	18.6661445651	4.1937883552	4.4509028553	0.000008551	0.0007980389
Contig106894	#N/A	0.4816127639	18.666195664	4.1852456419	4.4600000242	0.000008196	0.0007741737
Contig114347	#N/A	0.2732608071	18.6668286115	4.1892163459	4.4559237505	8.35327201898984E-06	0.0007852909
Contig103167	#N/A	0.2871001344	18.6938097611	4.18593817	4.4658590266	7.97481117667714E-06	0.0007593106
Contig45012	#N/A	0.257327874	18.6966617092	4.1923518277	4.4597072186	8.20716898155164E-06	0.0007746482
Contig42160	ref|XP_011061698.1| PREDICTED: calcium uptake protein 1 homolog, mitochondrial-like isoform X3 [Acromyrmex echinatior]	1.010531649	18.6972969493	4.1942355617	4.4578557104	8.27835926861695E-06	0.0007801279
Contig59639	ref|XP_011163813.1| PREDICTED: dynein intermediate chain 3, ciliary [Solenopsis invicta]	0.54217215	18.697519871	4.1841278454	4.4686779568	7.87045194992936E-06	0.0007529257
Contig125232	#N/A	0.2242420279	18.7014167946	4.191798727	4.4614300477	8.141452284291E-06	0.0007722437
Contig66861	ref|XP_011870772.1| PREDICTED: thrombospondin type-1 domain-containing protein 4-like [Vollenhovia emeryi]	3.3728879142	18.7161201889	4.1826020739	4.4747551543	7.64989242295362E-06	0.000738829
Contig4904	#N/A	0.7224227052	18.7233841178	4.181694188	4.4774637446	7.55350502886375E-06	0.0007325737
Contig29537	ref|XP_011690595.1| PREDICTED: LOW QUALITY PROTEIN: dynein heavy chain 8, axonemal [Wasmannia auropunctata]	0.9051956543	18.7392190027	4.1844132607	4.4783384994	7.52262502250343E-06	0.0007320416
Contig20223	#N/A	0.3133085596	18.7550012984	4.1817006797	4.4850176363	7.29079039594501E-06	0.0007214053
Contig110671	#N/A	0.430305981	18.7566283745	4.1889768407	4.4776156774	7.54813291519351E-06	0.0007325737
Contig87166	#N/A	0.2727046703	18.7591595809	4.1938110952	4.4730578357	7.71089106210032E-06	0.0007437036
Contig145243	ref|XP_011685761.1| PREDICTED: uncharacterized protein PF11_0207-like [Wasmannia auropunctata]	0.3959784967	18.7592345272	4.1842452401	4.4833018742	7.34968412125174E-06	0.0007241848
Contig143680	ref|XP_011865165.1| PREDICTED: axonemal 84 kDa protein-like [Vollenhovia emeryi]	0.4676889736	18.7756274672	4.1909457561	4.4800454504	7.46271463754463E-06	0.0007286369
Contig108122	#N/A	0.3192743225	18.7872449714	4.1797692593	4.4948043315	6.96339481411441E-06	0.0007002895
Contig52659	#N/A	0.3500542233	18.7877861651	4.1903787196	4.4835532591	0.000007341	0.0007241848
Contig109017	ref|XP_011862155.1| PREDICTED: dynein heavy chain 2, axonemal [Vollenhovia emeryi]	0.6464430044	18.7927367128	4.1851708431	4.4903153102	7.11178172713099E-06	0.0007110673
Contig114141	ref|XP_011635727.1| PREDICTED: protein spinster isoform X1 [Pogonomyrmex barbatus]	0.3766421323	18.7964148838	4.1844528522	4.4919647915	7.05690920297637E-06	0.0007071774
Contig104723	ref|XP_011870285.1| PREDICTED: mucin-5AC isoform X1 [Vollenhovia emeryi]	0.3262850942	18.7993984255	4.1860132674	4.4910030677	7.08885299814258E-06	0.0007093723
Contig65105	ref|XP_012059388.1| PREDICTED: probable nuclear hormone receptor HR3 isoform X1 [Atta cephalotes]	0.3378121627	18.8054307571	4.1999972786	4.4774864148	7.55270321312867E-06	0.0007325737
Contig146958	ref|XP_011695987.1| PREDICTED: uncharacterized protein LOC105454797 isoform X4 [Wasmannia auropunctata]	0.3408802856	18.8083889715	4.2006928113	4.4774492724	0.000007554	0.0007325737
Contig103155	ref|XP_011883558.1| PREDICTED: uncharacterized protein K02A2.6-like [Vollenhovia emeryi]	0.2033676528	18.8089489307	4.1920022417	4.4868651891	7.22787765677541E-06	0.0007182639
Contig103116	#N/A	0.1967269189	18.812551797	4.192823524	4.486845604	7.22854183571824E-06	0.0007182639
Contig124789	#N/A	0.3695970043	18.827521447	4.2006928271	4.4820038555	7.39454074295156E-06	0.0007256951
Contig88315	ref|XP_011156598.1| PREDICTED: patronin isoform X4 [Solenopsis invicta]	0.4705881755	18.8370165477	4.2006930704	4.4842639612	7.31660458238746E-06	0.000722947
Contig38090	ref|XP_011170571.1| PREDICTED: uncharacterized protein LOC105203472, partial [Solenopsis invicta]	0.2029483726	18.8403901531	4.1926858627	4.4936326666	7.00183663937181E-06	0.0007031546
Contig131689	#N/A	0.2063571237	18.8523712901	4.1920377841	4.4971854409	6.88589269781632E-06	0.0006939772
Contig137064	#N/A	0.2455166985	18.852911973	4.1949259456	4.4942180667	6.98260460955032E-06	0.000701722
Contig53500	ref|XP_012531132.1| PREDICTED: interleukin enhancer-binding factor 2 homolog [Monomorium pharaonis]	0.1853108511	18.8542759154	4.1930262167	4.4965795445	6.90553522743813E-06	0.0006949654
Contig112280	ref|XP_012061701.1| PREDICTED: uncharacterized protein LOC105624968 [Atta cephalotes]	2.122244647	18.8708782383	4.1674575757	4.5281512518	5.95019857289945E-06	0.0006248303
Contig14797	ref|XP_012248349.1| PREDICTED: uncharacterized protein LOC100745157 [Bombus impatiens]	1.0466851403	18.8995510014	4.1839703591	4.5171331007	6.2682507664211E-06	0.0006464854
Contig136019	ref|XP_012526392.1| PREDICTED: cubilin isoform X2 [Monomorium pharaonis]	0.7375615581	18.899884436	4.1836064675	4.5176057028	6.2542808681134E-06	0.0006455158
Contig143422	ref|XP_011692312.1| PREDICTED: protein FAM135A isoform X3 [Wasmannia auropunctata]	0.3004266957	18.9031242756	4.1929168363	4.5083470561	6.53346411748076E-06	0.0006660598
Contig49908	ref|XP_011697267.1| PREDICTED: uncharacterized protein CG7065-like [Wasmannia auropunctata]	0.2571904666	18.9087705669	4.1887142976	4.5142182597	6.35507431764798E-06	0.0006530567
Contig62835	ref|XP_011701836.1| PREDICTED: chymotrypsin-1-like [Wasmannia auropunctata]	0.6676874266	18.9133264207	4.183636984	4.5207857405	6.16105218269512E-06	0.0006391617
Contig132897	#N/A	0.5460589959	18.9175700188	4.1999909307	4.504193064	6.66256162295035E-06	0.0006762931
Contig71794	#N/A	0.4463406378	18.9233765371	4.1812987423	4.5257174154	6.01909646344843E-06	0.0006295191
Contig27927	ref|XP_011859045.1| PREDICTED: uncharacterized protein LOC105556561 [Vollenhovia emeryi]	0.2282453754	18.9361796187	4.1908000451	4.518511839	6.2275791838341E-06	0.0006441715
Contig128494	#N/A	0.5242501373	18.9377841638	4.1840795291	4.5261530122	6.00670960352097E-06	0.0006286889
Contig125961	#N/A	0.2019452579	18.9431716323	4.1923446443	4.518514874	6.22748993247967E-06	0.0006441715
Contig82124	ref|XP_011696000.1| PREDICTED: cytochrome P450 4C1-like [Wasmannia auropunctata]	0.3033087959	18.9455057102	4.2020776914	4.5086043385	6.52554751662272E-06	0.0006657331
Contig53478	#N/A	0.2948782402	18.9757716829	4.199996785	4.5180443353	6.2413417566187E-06	0.0006449552
Contig46782	#N/A	0.3635359142	18.9763958255	4.2059566696	4.5117906141	6.42826303728538E-06	0.0006572422
Contig140286	ref|XP_012542672.1| PREDICTED: uncharacterized protein K02A2.6-like [Monomorium pharaonis]	0.3246612191	18.9775429852	4.1912230831	4.5279248107	5.95657676503779E-06	0.0006248303
Contig62027	ref|XP_011057668.1| PREDICTED: uncharacterized protein LOC105147973 isoform X1 [Acromyrmex echinatior]	0.4445167088	18.9802655737	4.1963584242	4.5230325094	0.000006096	0.0006356788
Contig59850	ref|XP_011060299.1| PREDICTED: laminin subunit alpha-1 isoform X1 [Acromyrmex echinatior]	0.3766158368	18.9926603743	4.1995806723	4.5225135214	0.000006111	0.0006358321
Contig51127	ref|XP_011866432.1| PREDICTED: RE1-silencing transcription factor B-like isoform X2 [Vollenhovia emeryi]	0.3723454987	18.9994371882	4.1911785633	4.5331967849	5.80976428159981E-06	0.000615369
Contig100207	#N/A	0.4124237641	19.0009682847	4.179190312	4.5465668865	5.45280464526032E-06	0.0005850151
Contig149604	ref|XP_012528534.1| PREDICTED: ubiquitin-like modifier-activating enzyme 5 isoform X2 [Monomorium pharaonis]	0.2076963552	19.0013206432	4.1926871701	4.5320148803	5.84237332843223E-06	0.0006165122
Contig15535	#N/A	0.365834289	19.0160391739	4.1913549374	4.5369670328	5.70690235247413E-06	0.0006058363
Contig133083	#N/A	0.3379400051	19.0302040329	4.2059566696	4.5245839479	6.05144301580157E-06	0.0006320831
Contig129392	#N/A	0.2906377526	19.0351963767	4.1919029445	4.5409439648	5.60029161106479E-06	0.0005976619
Contig102984	ref|XP_011874599.1| PREDICTED: protein timeless homolog isoform X2 [Vollenhovia emeryi]	0.9765158767	19.069401677	4.1832517972	4.5585115602	5.15174293967182E-06	0.0005588535
Contig1457	#N/A	19.0013075516	19.0767991845	4.1979252716	4.5443398704	5.51076809769985E-06	0.0005898902
Contig25443	#N/A	0.7381808212	19.0781288393	4.1806629817	4.5634218598	5.03265462171424E-06	0.0005516672
Contig104195	#N/A	0.2301305139	19.0795092987	4.2049824556	4.5373576466	5.69634563656043E-06	0.0006051703
Contig103254	ref|XP_012534025.1| PREDICTED: growth arrest-specific protein 8 [Monomorium pharaonis]	0.231201361	19.0824902437	4.1923448456	4.5517463249	5.3202460267568E-06	0.0005720965
Contig2848	ref|XP_011706366.1| PREDICTED: uncharacterized protein LOC105461562 [Wasmannia auropunctata]	1.755366753	19.0862943453	4.1832846205	4.5625139278	5.05447394694482E-06	0.0005532006
Contig103782	ref|XP_011701790.1| PREDICTED: uncharacterized protein LOC105458275 isoform X1 [Wasmannia auropunctata]	1.4308777342	19.0880683385	4.1755698412	4.5713684753	4.8454937983756E-06	0.0005374048
Contig106247	ref|XP_011881376.1| PREDICTED: inosine-uridine preferring nucleoside hydrolase-like [Vollenhovia emeryi]	4.7483397396	19.0973543518	2.0757704526	9.2001282358	3.57522838310836E-20	1.01033808969612E-15
Contig45153	#N/A	0.3387131496	19.0977281497	4.1851397345	4.5632235389	5.0374129362998E-06	0.0005517607
Contig39417	#N/A	0.2862247109	19.1095160339	4.1920043385	4.5585630383	5.15048057306093E-06	0.0005588535
Contig80659	#N/A	0.2366207355	19.1135299478	4.1848184468	4.5673498602	4.93929224645709E-06	0.0005449302
Contig53432	#N/A	1.3458228125	19.1193428385	4.1831353601	4.5705771371	4.86382846512164E-06	0.000538803
Contig117575	ref|XP_012058965.1| PREDICTED: leukotriene A-4 hydrolase [Atta cephalotes]	0.3505693133	19.1503290074	4.184212069	4.576806503	4.72127779295609E-06	0.0005273537
Contig66507	#N/A	1.8730711831	19.1817302628	4.1909005821	4.5769948218	0.000004717	0.0005272962
Contig127136	ref|XP_011873599.1| PREDICTED: uncharacterized protein LOC105565207 [Vollenhovia emeryi]	0.2470334335	19.1872111335	4.1859082037	4.5837629971	4.5668184497888E-06	0.0005163935
Contig133537	ref|XP_011167444.1| PREDICTED: translation initiation factor IF-2, mitochondrial isoform X2 [Solenopsis invicta]	0.4287577968	19.1958840567	4.1909740939	4.5802917476	4.64327758580018E-06	0.0005211129
Contig121857	#N/A	0.2124608157	19.2015131406	4.1921396136	4.5803610831	4.64173844400226E-06	0.0005211129
Contig103321	#N/A	0.256661995	19.2055520626	4.1917965177	4.5816995127	4.61212292718996E-06	0.0005192662
Contig130482	#N/A	0.4508737619	19.2201080573	4.1999977895	4.5762186126	4.73455795305535E-06	0.0005284193
Contig27069	#N/A	0.3012567124	19.2324747765	4.1878382453	4.5924588415	4.38053922908276E-06	0.0004991589
Contig142105	#N/A	0.2322582762	19.2347910924	4.1921469994	4.5882911776	4.46889027476019E-06	0.0005067743
Contig89612	ref|XP_011877232.1| PREDICTED: tRNA (guanine-N(7)-)-methyltransferase isoform X1 [Vollenhovia emeryi]	0.6785742478	19.2464685398	4.1845633172	4.5993971367	4.23715346806845E-06	0.0004875383
Contig101080	ref|XP_015182254.1| PREDICTED: sorting nexin-8-like [Polistes dominula]	0.2963818183	19.2477089084	4.2014627463	4.5811923301	4.62332402694715E-06	0.0005196991
Contig57891	ref|XP_011875988.1| PREDICTED: uncharacterized protein LOC105566527 [Vollenhovia emeryi]	0.3918277682	19.2505503411	4.1935197904	4.5905471545	4.42085563451007E-06	0.0005021331
Contig57902	ref|XP_011166588.1| PREDICTED: putative fatty acyl-CoA reductase CG5065 [Solenopsis invicta]	0.5435148141	19.2562308239	4.2059566697	4.5783236339	4.68717118621589E-06	0.0005249637
Contig137723	ref|XP_011067182.1| PREDICTED: mitochondrial import receptor subunit TOM40 homolog 1 [Acromyrmex echinatior]	0.4332733354	19.2593533946	4.2059566697	4.5790660502	4.6705670596331E-06	0.0005237596
Contig102074	ref|XP_011647903.1| PREDICTED: sterile alpha and TIR motif-containing protein 1 isoform X2 [Pogonomyrmex barbatus]	0.3610159472	19.267785133	4.1913488157	4.597036892	4.28541763172659E-06	0.0004910922
Contig71718	ref|XP_012522206.1| PREDICTED: LOW QUALITY PROTEIN: uncharacterized protein LOC105828431 [Monomorium pharaonis]	0.3161922489	19.2758869225	4.1916601107	4.598628327	4.2528172142288E-06	0.000488545
Contig45609	ref|XP_011706366.1| PREDICTED: uncharacterized protein LOC105461562 [Wasmannia auropunctata]	2.3314133299	19.2800230671	4.1829334479	4.6092110494	0.000004042	0.0004707016
Contig131385	#N/A	0.3389603227	19.2818496247	4.1926132047	4.5990051272	4.24513335879526E-06	0.0004880591
Contig149141	#N/A	0.2466767579	19.2888262441	4.180101216	4.6144399973	3.94156622417289E-06	0.0004625677
Contig97931	ref|XP_011871868.1| PREDICTED: dystrotelin-like [Vollenhovia emeryi]	0.2390807725	19.2910481742	4.1850194809	4.6095479991	4.03545360239821E-06	0.00047046
Contig4764	ref|XP_012537122.1| PREDICTED: short-chain dehydrogenase/reductase family 16C member 6-like [Monomorium pharaonis]	0.7386741561	19.2935014257	4.1719971506	4.6245241138	3.7545940676032E-06	0.0004469359
Contig114028	#N/A	0.4781703225	19.3038400587	4.1933609527	4.603429153	4.15590613690062E-06	0.0004799481
Contig136175	ref|XP_011646324.1| PREDICTED: E3 ubiquitin-protein ligase UBR3 [Pogonomyrmex barbatus]	9.8614049873	19.31326267	4.1659152014	4.6360191545	3.55183067704848E-06	0.0004289428
Contig109585	ref|XP_011629509.1| PREDICTED: N(G),N(G)-dimethylarginine dimethylaminohydrolase 1 isoform X1 [Pogonomyrmex barbatus]	0.2152783892	19.3161392375	4.1928223836	4.6069538535	4.0861063644461E-06	0.000474561
Contig137300	ref|XP_011865967.1| PREDICTED: PHD finger protein 14 isoform X1 [Vollenhovia emeryi]	2.0616710177	19.3226477219	4.1983776909	4.6024081548	4.17633749265068E-06	0.0004817175
Contig59236	#N/A	0.5634704531	19.3231708091	4.1894956894	4.6122904143	3.982560306886E-06	0.0004666035
Contig106450	#N/A	0.231912796	19.3325622617	4.1921395149	4.6116218682	3.99539304882584E-06	0.0004671243
Contig125395	#N/A	0.231912796	19.3325622617	4.1921395149	4.6116218682	3.99539304882584E-06	0.0004671243
Contig111517	#N/A	0.6114725499	19.3442201507	3.8139760001	5.0719302246	3.93800788602791E-07	7.3407480246977E-05
Contig132593	ref|XP_011701495.1| PREDICTED: uncharacterized protein LOC105458122 [Wasmannia auropunctata]	0.2592711645	19.3478683444	4.191796242	4.615650959	3.91865073838084E-06	0.0004604977
Contig104443	#N/A	0.3254526813	19.367582081	4.2059566696	4.6047982902	4.12865841380714E-06	0.000478562
Contig58408	ref|XP_011872993.1| PREDICTED: uncharacterized protein LOC105564867 [Vollenhovia emeryi]	0.3599559369	19.3743806232	4.1913604227	4.6224563553	3.79222615285848E-06	0.0004510355
Contig9997	ref|XP_011866570.1| PREDICTED: transient receptor potential cation channel subfamily V member 5 [Vollenhovia emeryi]	0.5378730525	19.3758145482	4.1928518831	4.6211540709	3.81611230491566E-06	0.0004531136
Contig95493	ref|XP_012542162.1| PREDICTED: transcription elongation factor SPT4 [Monomorium pharaonis]	0.2101182467	19.3915121594	4.1928273241	4.624925059	3.74733863719706E-06	0.0004464483
Contig139399	ref|XP_011058994.1| PREDICTED: methyltransferase-like protein 4 [Acromyrmex echinatior]	1.7410895869	19.3991300039	4.1761608775	4.645206584	3.3973631781347E-06	0.0004141822
Contig100593	ref|XP_011704439.1| PREDICTED: isoaspartyl peptidase/L-asparaginase isoform X2 [Wasmannia auropunctata]	1.5202223542	19.4024601634	3.5597089109	5.4505749343	5.02072419913934E-08	1.39189458998192E-05
Contig60440	#N/A	2.011677136	19.4050211965	2.9425950138	6.5945266357	4.26614820642032E-11	3.60954456959624E-08
Contig132776	ref|XP_011872717.1| PREDICTED: uncharacterized protein LOC105564717 [Vollenhovia emeryi]	0.7216726607	19.4192077754	4.1777445416	4.6482516061	3.34760426088235E-06	0.0004088215
Contig48440	#N/A	0.435384993	19.4242372323	4.1833809245	4.6431911372	3.43068698472361E-06	0.000417165
Contig29953	ref|XP_013190478.1| PREDICTED: retrovirus-related Pol polyprotein from transposon TNT 1-94 [Amyelois transitella]	0.5164118844	19.4296296402	4.1912189037	4.6357945234	3.55569044660041E-06	0.0004290422
Contig16386	ref|XP_011057905.1| PREDICTED: uncharacterized protein LOC105148100 [Acromyrmex echinatior]	0.2607810746	19.429922259	4.2006897233	4.625412382	3.73853822693871E-06	0.0004464483
Contig18633	ref|XP_017065589.1| PREDICTED: UPF0755 protein YceG-like [Drosophila eugracilis]	0.5933599884	19.4338045575	4.1753261514	4.6544398815	3.24862602763047E-06	0.0003991488
Contig59978	ref|XP_011704616.1| PREDICTED: structural maintenance of chromosomes protein 1A-like [Wasmannia auropunctata]	0.4385325486	19.4389906864	4.1907991099	4.6384926065	3.50959488133943E-06	0.0004245678
Contig149632	ref|XP_011864720.1| PREDICTED: major facilitator superfamily domain-containing protein 12-like [Vollenhovia emeryi]	0.7837717834	19.4501844896	4.1847523887	4.6478698578	3.35380390154045E-06	0.0004092249
Contig133053	#N/A	0.3377070665	19.4582497543	4.1912227105	4.6426188963	3.44020551800113E-06	0.0004179628
Contig104290	#N/A	0.2842605293	19.4754865973	4.1811315692	4.6579463658	3.19379388966745E-06	0.0003941253
Contig115278	ref|XP_012058103.1| PREDICTED: A disintegrin and metalloproteinase with thrombospondin motifs 9 [Atta cephalotes]	0.2690358465	19.4943519471	4.1868007289	4.6561451594	3.22184816426625E-06	0.0003965483
Contig113397	#N/A	0.4542735086	19.5004199215	4.1907657318	4.6531877871	3.26842334981726E-06	0.0004012323
Contig146878	#N/A	0.2931278594	19.5021089625	4.1856984352	4.659224563	0.000003174	0.0003927151
Contig32075	ref|XP_011169190.1| PREDICTED: uncharacterized protein KIAA0195 isoform X5 [Solenopsis invicta]	0.4941984957	19.5101630196	4.1908690809	4.6553978764	3.23355653630838E-06	0.000397643
Contig74109	#N/A	0.3279620464	19.5150161523	4.1956337009	4.6512678521	0.000003299	0.0004042841
Contig23700	#N/A	0.3672576636	19.5281759715	4.1844508781	4.666843163	3.05862615547123E-06	0.0003827942
Contig37895	ref|XP_011688840.1| PREDICTED: uncharacterized protein LOC105450605 [Wasmannia auropunctata]	0.2539121121	19.5295847656	4.1896461836	4.661392373	3.1407729793119E-06	0.000389057
Contig47940	#N/A	0.2476275153	19.5333435749	4.1891489603	4.6628429211	3.1187079928059E-06	0.0003882503
Contig105302	ref|XP_011635590.1| PREDICTED: condensin-2 complex subunit D3-like [Pogonomyrmex barbatus]	1.5902854023	19.534547836	4.190766033	4.6613310507	3.14170907304073E-06	0.000389057
Contig135565	#N/A	0.4037137938	19.5371056817	4.1814320311	4.6723480225	2.97775839614493E-06	0.0003756682
Contig149476	#N/A	0.3147511889	19.5496284707	4.186995262	4.6691307841	3.02476782727517E-06	0.0003799028
Contig14027	#N/A	0.9388161096	19.5499727587	4.1940449347	4.6613646403	3.14119628938878E-06	0.000389057
Contig132656	ref|XP_011866714.1| PREDICTED: uncharacterized protein LOC105561386 isoform X2 [Vollenhovia emeryi]	0.2320735013	19.5543491963	4.1866119672	4.6706858313	0.000003002	0.000378046
Contig105827	ref|XP_011874752.1| PREDICTED: DDB1- and CUL4-associated factor 11 [Vollenhovia emeryi]	0.5150728708	19.5592235691	4.1908116539	4.6671683637	3.05379089451242E-06	0.0003825279
Contig143155	ref|XP_011864472.1| PREDICTED: uncharacterized protein LOC105560198 [Vollenhovia emeryi]	0.4144469484	19.5612384827	4.1991029073	4.658432745	3.1862586717614E-06	0.0003938835
Contig114016	ref|XP_011876437.1| PREDICTED: short/branched chain specific acyl-CoA dehydrogenase, mitochondrial-like [Vollenhovia emeryi]	0.3103211736	19.5614348913	4.192512119	4.6658028256	3.07414383628269E-06	0.0003837088
Contig67883	ref|XP_011631119.1| PREDICTED: LOW QUALITY PROTEIN: juvenile hormone esterase-like [Pogonomyrmex barbatus]	0.277570252	19.587983565	4.20208816	4.6614880077	3.13931363442238E-06	0.000389057
Contig99542	ref|XP_012535551.1| PREDICTED: uncharacterized protein LOC105836216 [Monomorium pharaonis]	4.3141293973	19.5999417417	2.871787664	6.8249968434	8.79272488036965E-12	9.17512361087908E-09
Contig75870	ref|XP_012062482.1| PREDICTED: UDP-glucuronosyltransferase 1-9-like [Atta cephalotes]	0.3204787554	19.6162609591	4.1849215241	4.6873665005	2.76743108531167E-06	0.000353873
Contig106813	#N/A	0.3111009249	19.6207712347	4.2006736045	4.6708630763	2.99936827302769E-06	0.000378046
Contig32223	#N/A	0.3324521354	19.6240773055	4.1838715866	4.6904109983	2.72656810841918E-06	0.0003499145
Contig137170	ref|XP_011696946.1| PREDICTED: uncharacterized protein LOC105455370 [Wasmannia auropunctata]	0.3016339376	19.6281873929	4.1852309665	4.6898695795	2.73379240211447E-06	0.0003502055
Contig121052	ref|XP_011865402.1| PREDICTED: probable cation-transporting ATPase 13A3 [Vollenhovia emeryi]	4.8036139343	19.6711183253	4.1533376901	4.7362193477	2.17741918674026E-06	0.0002910717
Contig144568	ref|XP_011174651.1| PREDICTED: uncharacterized protein LOC105206894, partial [Solenopsis invicta]	0.4371854329	19.6738452096	4.1911791866	4.6941073941	2.67773340423068E-06	0.0003442727
Contig124176	ref|XP_011066301.1| PREDICTED: LOW QUALITY PROTEIN: protein real-time [Acromyrmex echinatior]	0.5057310826	19.6756054038	4.1908744787	4.6948686972	2.66778027505889E-06	0.0003434773
Contig103436	#N/A	0.4646985882	19.6813658471	4.17774562	4.7110014916	0.000002465	0.0003230988
Contig141931	#N/A	0.3000197991	19.723301332	4.1841742782	4.7137858083	2.43156261519644E-06	0.0003196023
Contig139712	#N/A	0.4949459616	19.7291403756	4.1989536041	4.6985849894	2.61970171903274E-06	0.0003392414
Contig105965	ref|XP_011874477.1| PREDICTED: uncharacterized protein LOC105565685 isoform X2 [Vollenhovia emeryi]	0.9554867493	19.7495976678	4.1831564628	4.721218975	2.34435377567616E-06	0.0003098631
Contig124785	#N/A	0.2391471341	19.7638521527	4.1871980024	4.7200662929	2.35767792899155E-06	0.0003107582
Contig110187	#N/A	0.2929003317	19.7758220992	4.194213677	4.7150249421	2.41681142074412E-06	0.0003179592
Contig133840	ref|XP_011859007.1| PREDICTED: uncharacterized protein LOC105556520 [Vollenhovia emeryi]	0.3532939815	19.7789972484	4.1968352108	4.7128362813	2.4429246579193E-06	0.0003204995
Contig35221	ref|XP_011873858.1| PREDICTED: rotatin isoform X2 [Vollenhovia emeryi]	7.0319247494	19.8184920424	4.1879686802	4.7322445691	2.22050639762061E-06	0.000295434
Contig63827	#N/A	0.386891781	19.823152351	4.1871243648	4.7343118149	0.000002198	0.0002929908
Contig64286	ref|XP_014675604.1| PREDICTED: uncharacterized protein LOC106815629 [Priapulus caudatus]	0.5007028552	19.8275067849	4.183600666	4.7393401923	2.14415261575123E-06	0.0002868961
Contig8527	ref|XP_011685553.1| PREDICTED: transcription intermediary factor 1-beta-like isoform X1 [Wasmannia auropunctata]	1.6947883693	19.8468168299	4.1984776248	4.7271460285	0.000002277	0.0003015274
Contig130765	#N/A	0.5712935881	19.8510197938	4.1946395397	4.7324733403	0.000002218	0.0002953792
Contig68120	ref|XP_003493099.2| PREDICTED: probable amino-acid permease meu22 [Bombus impatiens]	0.552483013	19.8617088411	4.1865169452	4.744208396	2.09323272124719E-06	0.0002819519
Contig117964	ref|XP_011872398.1| PREDICTED: glutamate receptor ionotropic, kainate 2-like isoform X3 [Vollenhovia emeryi]	1.192338719	19.8709172543	4.1922723343	4.7398917985	2.13832377174381E-06	0.0002863874
Contig19512	#N/A	0.9975095453	19.89819304	4.1840392348	4.7557376791	1.97723078803645E-06	0.0002679913
Contig99945	#N/A	0.2997143727	19.9006278563	4.1806547454	4.7601701332	1.93429835137244E-06	0.000263305
Contig17461	ref|XP_014218529.1| PREDICTED: galectin-8-like [Copidosoma floridanum]	1.490536796	19.9060591659	4.1919265326	4.7486660396	2.04762740907426E-06	0.0002766
Contig75827	#N/A	0.7146437959	19.9191015488	3.8357898945	5.1929594938	0.000000207	4.46492542957105E-05
Contig148755	ref|XP_011870307.1| PREDICTED: 5-hydroxytryptamine receptor 2A-like isoform X2 [Vollenhovia emeryi]	0.5641440013	19.9396186147	4.1840973883	4.7655723001	1.88318352433129E-06	0.0002580875
Contig147633	#N/A	0.2824319133	19.9422693164	4.1804342906	4.7703821972	1.83876696707274E-06	0.0002534754
Contig140111	ref|XP_011168108.1| PREDICTED: uncharacterized protein LOC105201688 isoform X1 [Solenopsis invicta]	1.3747445537	19.9538547147	4.1874845969	4.7651171611	1.88743944834954E-06	0.0002584201
Contig135369	#N/A	0.3921651438	19.9703350687	4.198668232	4.7563498627	1.97124720034336E-06	0.0002675613
Contig124109	#N/A	0.1995433766	19.9703584457	4.1923516143	4.7635218328	1.90243016182919E-06	0.0002599687
Contig125386	#N/A	0.2903352048	19.9948188784	4.1871183966	4.775317291	1.79424130736014E-06	0.0002485499
Contig148396	ref|XP_011868652.1| PREDICTED: UNC93-like protein [Vollenhovia emeryi]	50.459929451	2.0015205018	0.5889567877	3.3984165624	0.0006777713	0.0221375535
Contig21424	ref|XP_011879731.1| PREDICTED: uncharacterized protein LOC105568562 [Vollenhovia emeryi]	9.8505288871	2.004852154	0.5492023214	3.6504801159	0.0002617506	0.0100392429
Contig78412	ref|XP_012063650.1| PREDICTED: mitochondrial ornithine transporter 1 [Atta cephalotes]	96.3548517293	2.0164650162	0.4649289937	4.3371461959	1.44344620173316E-05	0.0010965302
Contig5359	ref|XP_012522124.1| PREDICTED: papilin isoform X1 [Monomorium pharaonis]	1232.032386736	2.0205957888	0.628536498	3.2147628584	0.0013055233	0.0384705983
Contig83450	#N/A	684.1226150143	2.0657016417	0.592859228	3.4843037676	0.0004934191	0.0170253097
Contig143838	#N/A	7.9765777547	2.068905376	0.5473869467	3.779603055	0.0001570786	0.0065087188
Contig14452	ref|XP_011063720.1| PREDICTED: MAM and LDL-receptor class A domain-containing protein 2-like [Acromyrmex echinatior]	181.998068999	2.0811472989	0.6545542208	3.1794880128	0.0014753547	0.0426628211
Contig14581	#N/A	25.5228032293	2.0829068321	0.5693093059	3.6586558666	0.0002535415	0.0097668093
Contig16100	ref|XP_012521288.1| PREDICTED: collagen alpha-1(IV) chain [Monomorium pharaonis]	1799.0075686545	2.098145422	0.6399543029	3.2785863187	0.0010432845	0.0318524141
Contig42305	ref|XP_011859157.1| PREDICTED: fatty acid synthase-like, partial [Vollenhovia emeryi]	57.9923611482	2.1127433732	0.5942814429	3.5551225745	0.0003778029	0.0136597797
Contig23798	ref|XP_011700687.1| PREDICTED: DNA excision repair protein ERCC-6-like [Wasmannia auropunctata]	39.0541892609	2.116839868	0.6409575838	3.3026208311	0.0009578581	0.0296154215
Contig87995	ref|XP_011861287.1| PREDICTED: neprilysin-like [Vollenhovia emeryi]	144.8123466537	2.132950102	0.6493208346	3.2848939821	0.0010202075	0.031283043
Contig37066	ref|XP_011697055.1| PREDICTED: L-asparaginase [Wasmannia auropunctata]	133.5778400984	2.1490623626	0.6872866239	3.1268793655	0.001766724	0.0493287003
Contig19963	ref|XP_011863793.1| PREDICTED: G-protein coupled receptor Mth2-like isoform X3 [Vollenhovia emeryi]	146.1970809509	2.1491323044	0.5442841212	3.9485485992	7.86264550482299E-05	0.0037081716
Contig3678	#N/A	235.106802086	2.1691361498	0.583283354	3.7188377397	0.0002001416	0.0080066257
Contig15777	ref|XP_011170453.1| PREDICTED: L-asparaginase-like [Solenopsis invicta]	437.1517916211	2.1746683227	0.688156811	3.1601348528	0.0015769613	0.0449596255
Contig60304	ref|XP_011861287.1| PREDICTED: neprilysin-like [Vollenhovia emeryi]	200.7121518542	2.1832658683	0.5348859577	4.0817408589	4.46996211651241E-05	0.0024488394
Contig20213	ref|XP_011704767.1| PREDICTED: alpha-tocopherol transfer protein-like isoform X1 [Wasmannia auropunctata]	159.6897085811	2.1898944853	0.6124009559	3.5759161772	0.0003490035	0.0128019584
Contig17164	ref|XP_012057610.1| PREDICTED: serine/threonine-protein kinase fray2 [Atta cephalotes]	23.5848330346	2.2104419843	0.6399291534	3.4541979726	0.000551932	0.018715225
Contig12170	ref|XP_011875052.1| PREDICTED: mucin-19-like isoform X2 [Vollenhovia emeryi]	43.6912350546	2.2192991427	0.6906380469	3.2134041164	0.0013117159	0.0385989955
Contig76089	ref|XP_011056256.1| PREDICTED: T-lymphocyte activation antigen CD86-like [Acromyrmex echinatior]	28.3950088348	2.2363597635	0.6432539263	3.4766360094	0.0005077466	0.0174553535
Contig54875	ref|XP_011701295.1| PREDICTED: insulin-like growth factor-binding protein complex acid labile subunit [Wasmannia auropunctata]	90.5909385828	2.2599282776	0.6636605223	3.4052474142	0.0006610413	0.0217176725
Contig2660	ref|XP_011298410.1| PREDICTED: uncharacterized protein LOC105263718 [Fopius arisanus]	58.7541955905	2.280214153	0.5095314458	4.475119586	7.63685569136352E-06	0.0007382859
Contig7197	ref|XP_011861288.1| PREDICTED: neprilysin-like isoform X1 [Vollenhovia emeryi]	1970.5024943832	2.287366817	0.6760823454	3.3832665987	0.0007162906	0.0231866476
Contig34596	ref|XP_011861286.1| PREDICTED: endothelin-converting enzyme 2-like [Vollenhovia emeryi]	303.3341405014	2.2936952065	0.6849346042	3.3487798579	0.0008116826	0.0257900421
Contig105170	#N/A	12.1546515799	2.3017088501	0.6473689537	3.5554822902	0.0003772864	0.0136515828
Contig127970	#N/A	6.2417229171	2.3108650363	0.7368819931	3.1360042151	0.0017126674	0.0480434323
Contig2747	#N/A	23.3286537119	2.3191234408	0.5530406903	4.1934047198	2.74798528327696E-05	0.0017112127
Contig44143	ref|XP_011861289.1| PREDICTED: neprilysin-like isoform X2 [Vollenhovia emeryi]	157.6158977627	2.3213918092	0.5640843945	4.1153271242	3.86630686394613E-05	0.0021869398
Contig111898	ref|XP_011871523.1| PREDICTED: uncharacterized protein LOC105564042 [Vollenhovia emeryi]	75.3362725631	2.3223544167	0.5796915456	4.0061899025	0.000061706	0.0030852367
Contig15346	#N/A	5.7430801614	2.3355875978	0.6497623179	3.5945260807	0.0003249826	0.0120522481
Contig41563	ref|XP_011637104.1| PREDICTED: leptin receptor overlapping transcript-like 1 isoform X1 [Pogonomyrmex barbatus]	18.3530436788	2.340742033	0.6835000522	3.424640606	0.0006156132	0.0204524566
Contig134522	ref|XP_012054571.1| PREDICTED: chondroadherin-like [Atta cephalotes]	328.284593777	2.344293148	0.6471331432	3.6225824199	0.0002916765	0.0110165762
Contig126538	ref|XP_011689426.1| PREDICTED: endothelin-converting enzyme 2-like [Wasmannia auropunctata]	332.0388083018	2.3500794367	0.7223190827	3.2535197988	0.0011398478	0.0343047172
Contig29697	#N/A	663.1946877978	2.3631893979	0.669765783	3.5283817985	0.0004181086	0.0148847304
Contig17473	ref|XP_011880980.1| PREDICTED: cytochrome P450 4C1-like [Vollenhovia emeryi]	60.6604251648	2.4004323825	0.7562637027	3.1740679525	0.0015031849	0.0433106695
Contig68444	ref|XP_011861289.1| PREDICTED: neprilysin-like isoform X2 [Vollenhovia emeryi]	1385.6690202666	2.4148775595	0.714076318	3.3818199802	0.0007200732	0.0232824204
Contig105624	ref|XP_011861287.1| PREDICTED: neprilysin-like [Vollenhovia emeryi]	570.911940538	2.4243615123	0.7066309866	3.4308734804	0.0006016411	0.0200590107
Contig110039	ref|XP_014473049.1| PREDICTED: microtubule-associated protein futsch-like isoform X13 [Dinoponera quadriceps]	16.2584052713	2.4349088973	0.733383163	3.3201047149	0.0008998369	0.0281106021
Contig25504	ref|XP_011861289.1| PREDICTED: neprilysin-like isoform X2 [Vollenhovia emeryi]	389.0675946931	2.4359409943	0.6343524797	3.8400433076	0.0001230126	0.0052798641
Contig126787	#N/A	100.9697697787	2.4469498137	0.6113226365	4.0027142254	6.26199232287569E-05	0.0031127828
Contig92971	ref|XP_011174283.1| PREDICTED: neprilysin-21-like [Solenopsis invicta]	483.143353243	2.4511491016	0.6354943571	3.8570745343	0.0001147522	0.0049902155
Contig25505	ref|XP_011861289.1| PREDICTED: neprilysin-like isoform X2 [Vollenhovia emeryi]	561.5797736805	2.4591024742	0.6786370516	3.6235900595	0.000290542	0.0109825332
Contig18825	#N/A	136.2742471775	2.4644392416	0.7410317661	3.3256863664	0.0008820111	0.0276576848
Contig14351	ref|XP_011689426.1| PREDICTED: endothelin-converting enzyme 2-like [Wasmannia auropunctata]	3795.3143199301	2.4673899888	0.6416369081	3.8454614402	0.0001203258	0.0051961102
Contig141211	#N/A	4.5991756015	2.4709884176	0.7877363628	3.1368215743	0.0017079003	0.047938114
Contig34593	ref|XP_011861285.1| PREDICTED: neprilysin-11-like [Vollenhovia emeryi]	421.6139846331	2.4837211917	0.6715477195	3.6985029053	0.0002168749	0.0085644964
Contig94595	ref|XP_012054104.1| PREDICTED: LOW QUALITY PROTEIN: probable RNA-binding protein 46 [Atta cephalotes]	155.2775061207	2.485603748	0.661542238	3.7572865423	0.0001717658	0.0070176155
Contig26290	ref|XP_011175859.1| PREDICTED: ras-related protein Rab-3 isoform X2 [Solenopsis invicta]	17.1499311876	2.5149218723	0.647231475	3.8856606475	0.000102052	0.0045588488
Contig461	#N/A	3.1293826796	2.5343980036	0.7892757997	3.2110423311	0.0013225445	0.0388748849
Contig126981	ref|XP_011700911.1| PREDICTED: galactokinase-like isoform X2 [Wasmannia auropunctata]	49.5925712866	2.5407216053	0.7938572566	3.2004766401	0.0013720049	0.0400951762
Contig104073	ref|XP_011169896.1| PREDICTED: membrane metallo-endopeptidase-like 1 [Solenopsis invicta]	701.0806514523	2.541950102	0.7000801408	3.6309415936	0.0002823891	0.0107288872
Contig138470	ref|XP_011703877.1| PREDICTED: transcriptional protein SWT1 isoform X2 [Wasmannia auropunctata]	4.3565438057	2.5508567651	0.6919049433	3.6867156242	0.000227167	0.0089111635
Contig107175	ref|XP_011861287.1| PREDICTED: neprilysin-like [Vollenhovia emeryi]	79.4955073651	2.5526507243	0.8172580331	3.1234330173	0.0017875455	0.0498470126
Contig147011	#N/A	14.0366715158	2.6078174914	0.7961867857	3.2753840407	0.0010551842	0.0321354566
Contig24511	#N/A	6.3250183161	2.6391315762	0.7751231524	3.4047900234	0.0006621495	0.0217176725
Contig100112	ref|XP_011691582.1| PREDICTED: RNA-binding protein 47-like [Wasmannia auropunctata]	10.9052288887	2.6592151089	0.8355648891	3.1825357237	0.001459915	0.0422675877
Contig37636	ref|XP_011644491.1| PREDICTED: UDP-glucuronosyltransferase 2B31-like [Pogonomyrmex barbatus]	405.5102621798	2.6985218283	0.767439781	3.5162652436	0.0004376635	0.0154640012
Contig10117	ref|XP_011069205.1| PREDICTED: maltase 2-like [Acromyrmex echinatior]	380.3175028296	2.8254042532	0.8189310206	3.4501126248	0.0005603527	0.0189280801
Contig68445	ref|XP_011861287.1| PREDICTED: neprilysin-like [Vollenhovia emeryi]	76.1469621334	2.8572767905	0.8707165874	3.2815233243	0.0010324798	0.0315976403
Contig87992	ref|XP_011861287.1| PREDICTED: neprilysin-like [Vollenhovia emeryi]	69.238598398	2.901065209	0.7864113731	3.68899193	0.0002251444	0.0088440986
Contig23779	ref|XP_011858111.1| PREDICTED: uncharacterized protein LOC105555691 [Vollenhovia emeryi]	71.0084219757	2.902736451	0.8358737496	3.4726972252	0.0005152563	0.0176752042
Contig64001	ref|XP_012522422.1| PREDICTED: alpha-tocopherol transfer protein-like [Monomorium pharaonis]	6.3206612384	2.9216637186	0.9080871841	3.2173823944	0.0012936605	0.0381762527
Contig69698	ref|XP_011686305.1| PREDICTED: uncharacterized protein LOC105449025 isoform X2 [Wasmannia auropunctata]	81.2413233619	2.962142947	0.7601298714	3.8968905953	9.74356075714797E-05	0.004399923
Contig7694	#N/A	6.5643795548	2.9646345973	0.8146211322	3.6392802495	0.0002734011	0.0104294708
Contig92270	ref|XP_011861289.1| PREDICTED: neprilysin-like isoform X2 [Vollenhovia emeryi]	10.0130820986	2.9923032959	0.88785817	3.3702492099	0.0007510023	0.0241828564
Contig51566	#N/A	1.1179490522	20.0221984616	4.1798636846	4.7901558454	1.66651826874424E-06	0.0002352388
Contig149157	#N/A	0.2289081796	20.0229483216	4.1866223964	4.7826019225	1.73040597176209E-06	0.0002423203
Contig85932	ref|XP_011645366.1| PREDICTED: Down syndrome cell adhesion molecule-like protein Dscam2 isoform X11 [Pogonomyrmex barbatus]	0.2390034055	20.0501490063	4.1862322932	4.7895452526	1.6715969943909E-06	0.0002354852
Contig131208	#N/A	0.2815577002	20.0559544773	4.1813265707	4.796552993	1.61419267642691E-06	0.0002285377
Contig128190	ref|XP_011881883.1| PREDICTED: uncharacterized protein LOC105569771 [Vollenhovia emeryi]	0.3491737787	20.0755345409	4.1914877181	4.7895964133	1.6711708851485E-06	0.0002354852
Contig102526	#N/A	0.7166581583	20.0954718793	4.1814505113	4.8058614649	1.54086571746554E-06	0.0002217272
Contig81066	#N/A	0.5860703816	20.0982553305	4.1656369063	4.8247736859	1.40162329139661E-06	0.0002058682
Contig40718	ref|XP_011567215.1| PREDICTED: 1-deoxy-D-xylulose-5-phosphate synthase 1, chloroplastic-like [Plutella xylostella]	0.2720175536	20.1021663858	4.1867500202	4.8013772709	1.57578073168127E-06	0.0002249021
Contig122785	ref|XP_014214078.1| PREDICTED: uncharacterized protein LOC106643444 [Copidosoma floridanum]	1.1570657733	20.1120223131	4.1836389889	4.8073034902	1.52979667541522E-06	0.0002210181
Contig83127	ref|XP_011696169.1| PREDICTED: leukotriene A-4 hydrolase [Wasmannia auropunctata]	0.8163609769	20.115285167	4.1904764945	4.8002381575	1.58477055567248E-06	0.0002253965
Contig107468	ref|XP_011690198.1| PREDICTED: protein EFR3 homolog cmp44E [Wasmannia auropunctata]	5.1183383726	20.1200691913	4.1904460239	4.8014147126	1.57548607776817E-06	0.0002249021
Contig98512	ref|XP_011872886.1| PREDICTED: protein NETWORKED 1D-like isoform X2 [Vollenhovia emeryi]	0.323237805	20.1356529157	4.1914888028	4.8039381382	1.55574913781555E-06	0.000223397
Contig66994	ref|XP_011705849.1| PREDICTED: kinesin-associated protein 3 isoform X2 [Wasmannia auropunctata]	1.02803134	20.1372480831	4.1839277955	4.8130008613	1.48680648271293E-06	0.000215468
Contig23592	ref|XP_012529644.1| PREDICTED: eukaryotic translation initiation factor 4E type 2 [Monomorium pharaonis]	0.8857584907	20.1592918673	4.1757009829	4.8277623205	1.38075746474405E-06	0.0002034378
Contig108048	#N/A	0.3558576457	20.1748229964	4.1864664163	4.8190576467	1.44237876923675E-06	0.0002101884
Contig29730	ref|XP_011879836.1| PREDICTED: mitochondrial pyruvate carrier 2-like [Vollenhovia emeryi]	0.3559422494	20.1841020441	4.2006947785	4.8049437316	0.000001548	0.0002225033
Contig150271	#N/A	0.6588187348	20.2036299311	4.1727798501	4.8417675163	1.28689274996653E-06	0.000191203
Contig89567	ref|XP_011860147.1| PREDICTED: uncharacterized protein LOC105557504 isoform X2 [Vollenhovia emeryi]	0.3858568227	20.211800007	4.1919044606	4.8216270664	1.42391971162714E-06	0.0002082595
Contig92844	ref|XP_011875513.1| PREDICTED: calcium-dependent protein kinase 4-like [Vollenhovia emeryi]	1.4666185474	20.2188134034	4.1961426737	4.8184284892	1.44693366956824E-06	0.0002105534
Contig129271	ref|XP_014478543.1| PREDICTED: uncharacterized protein LOC106746451 [Dinoponera quadriceps]	0.2269017451	20.2367063134	4.1921464139	4.8272899645	0.000001384	0.0002034964
Contig146658	ref|XP_016918628.1| PREDICTED: probable tRNA(His) guanylyltransferase [Apis cerana]	0.2099289292	20.2553807257	4.1854336558	4.839493919	1.30170174043642E-06	0.0001927951
Contig60318	#N/A	1.0995303256	20.2588380056	3.5603485027	5.6901278035	1.26944323608774E-08	4.64685287382097E-06
Contig84985	#N/A	0.7813825378	20.2648754353	4.1823899264	4.8452860188	1.26429409301745E-06	0.0001886388
Contig91650	ref|XP_012058883.1| PREDICTED: alpha-protein kinase 1 [Atta cephalotes]	0.3316915892	20.2745153802	4.1914358318	4.8371288967	1.31728010814774E-06	0.0001948981
Contig99707	#N/A	0.8725888799	20.279053686	4.2059566697	4.8215079894	1.4247701337339E-06	0.0002082595
Contig18251	#N/A	0.3849332375	20.2858206464	4.1844460829	4.8479106301	1.2476858219983E-06	0.0001867899
Contig116508	#N/A	0.2623094483	20.2948219195	4.1828065622	4.8519628192	1.2224554442021E-06	0.000184181
Contig67556	#N/A	0.2736162741	20.2956912352	4.1798903684	4.855555875	1.20049496383981E-06	0.0001814185
Contig148786	#N/A	0.3281537028	20.303847001	4.1919529747	4.8435292865	1.27552910246788E-06	0.0001899141
Contig118786	#N/A	0.3411595066	20.3081353659	4.1918628049	4.8446564955	1.26830915962371E-06	0.0001890383
Contig149286	#N/A	0.8181655739	20.3151033446	4.1749035803	4.8660053948	1.13876410295813E-06	0.0001745162
Contig133848	ref|XP_015603309.1| PREDICTED: angiopoietin-2 [Cephus cinctus]	0.1645668148	20.3240319076	4.1874295703	4.8535817895	1.21251300360611E-06	0.0001830389
Contig138381	#N/A	0.3000166092	20.3407549771	4.1828988298	4.8628369475	1.15715165060226E-06	0.0001763776
Contig40847	#N/A	0.4096610326	20.341508274	4.1867414698	4.8585537036	1.18246337308096E-06	0.0001792688
Contig141541	ref|XP_012214839.1| PREDICTED: putative golgin subfamily A member 6-like protein 6 [Linepithema humile]	1.3024169348	20.3438109411	4.1831492445	4.8632763863	1.15458448447892E-06	0.0001761764
Contig126235	#N/A	0.5500922528	20.3518315869	4.1991057117	4.8467061761	1.25528125833022E-06	0.0001876616
Contig22836	#N/A	0.8274305493	20.3521472299	4.171942145	4.8783387982	1.06983047330785E-06	0.0001659318
Contig11185	ref|XP_014480224.1| PREDICTED: heat shock 70 kDa protein cognate 4-like [Dinoponera quadriceps]	0.2712472035	20.353888965	4.186424356	4.8618790725	1.16276652583747E-06	0.0001770425
Contig74783	ref|XP_011694699.1| PREDICTED: post-GPI attachment to proteins factor 3 isoform X2 [Wasmannia auropunctata]	0.9414482416	20.3842816704	4.2059566696	4.8465267884	1.25641629761679E-06	0.0001876616
Contig149764	ref|XP_012543005.1| PREDICTED: sorting nexin-2 isoform X1 [Monomorium pharaonis]	0.3427531152	20.3854693619	4.1804514938	4.8763798341	1.0805045888619E-06	0.0001668547
Contig127527	ref|XP_011876813.1| PREDICTED: solute carrier family 25 member 35-like isoform X1 [Vollenhovia emeryi]	0.3319926182	20.4104990201	4.1851100185	4.8769324892	1.07748291602228E-06	0.0001667526
Contig64651	ref|XP_011871455.1| PREDICTED: ankyrin repeat and BTB/POZ domain-containing protein BTBD11 isoform X4 [Vollenhovia emeryi]	1.7435607038	20.4301814283	4.0079986414	5.0973523836	3.4443681073913E-07	6.58564114303205E-05
Contig113723	#N/A	0.4467621287	20.4318269133	4.1840923638	4.8832160328	1.04369414836016E-06	0.0001625919
Contig117904	ref|XP_011065321.1| PREDICTED: gastrula zinc finger protein xFG20-1-like isoform X2 [Acromyrmex echinatior]	0.652572093	20.4331000798	4.1995806487	4.865509628	1.14162253087547E-06	0.0001747647
Contig25634	ref|XP_012232774.1| PREDICTED: LOW QUALITY PROTEIN: methionine--tRNA ligase, cytoplasmic [Linepithema humile]	0.609974987	20.437288386	4.1922641412	4.8750001665	1.08808363362496E-06	0.000167476
Contig104777	ref|XP_011687076.1| PREDICTED: uncharacterized protein LOC105449517 [Wasmannia auropunctata]	0.1669596074	20.4385482704	4.1911170674	4.8766350216	1.07910832487299E-06	0.0001668214
Contig124637	#N/A	0.3244078342	20.449446129	4.188293318	4.8825248321	1.04736044773291E-06	0.0001629834
Contig141174	#N/A	0.4634675741	20.4564838531	4.1827065435	4.8907289193	1.00463243562913E-06	0.0001572885
Contig126156	ref|XP_011863792.1| PREDICTED: G-protein coupled receptor Mth2-like isoform X2 [Vollenhovia emeryi]	0.6800741666	20.4600879067	3.8066063453	5.3748893505	7.66297255685035E-08	1.96151274160378E-05
Contig141576	ref|XP_012054768.1| PREDICTED: methionyl-tRNA formyltransferase, mitochondrial [Atta cephalotes]	0.5283109432	20.4795088865	4.191177813	4.8863373973	1.02729093966138E-06	0.0001602132
Contig9722	ref|XP_011698234.1| PREDICTED: organic cation transporter 1-like [Wasmannia auropunctata]	2.8618702074	20.4886245533	2.6028760154	7.8715330396	3.50321596648283E-15	4.94993906416124E-11
Contig103951	ref|XP_012058254.1| PREDICTED: probable maleylacetoacetate isomerase 2 [Atta cephalotes]	0.3664173846	20.5022194072	4.1777891881	4.9074327315	9.22762888168632E-07	0.000145843
Contig113080	ref|XP_012055059.1| PREDICTED: serine protease nudel [Atta cephalotes]	1.1868655177	20.5117553479	4.1902787974	4.8950812917	9.82651001168139E-07	0.0001546165
Contig104062	ref|XP_011163422.1| PREDICTED: putative glycerol kinase 5 isoform X2 [Solenopsis invicta]	0.3667484518	20.5122436063	4.1806075241	4.9065221951	9.27055024785521E-07	0.0001463154
Contig105360	ref|XP_016772395.1| PREDICTED: ultrabithorax isoform X2 [Apis mellifera]	1.5256143593	20.5218915623	4.1996474279	4.8865748648	1.02605322321766E-06	0.000160197
Contig146314	ref|XP_011688398.1| PREDICTED: uncharacterized protein LOC105450312 [Wasmannia auropunctata]	0.4207464413	20.5221903667	4.177773246	4.912231746	9.00455327694161E-07	0.0001426364
Contig81015	ref|XP_011169675.1| PREDICTED: protein tramtrack, beta isoform-like [Solenopsis invicta]	0.9439685722	20.5501613043	4.2006938682	4.8920873429	9.9772147141869E-07	0.0001566389
Contig100407	#N/A	0.371240761	20.5801395682	4.1852974182	4.9172466164	8.77699519157976E-07	0.0001398813
Contig125733	#N/A	0.2115857318	20.5862146038	4.1872457422	4.916409466	8.81459332420625E-07	0.0001402563
Contig85026	ref|XP_011870258.1| PREDICTED: calcium-dependent secretion activator isoform X2 [Vollenhovia emeryi]	14.4942040846	20.627420874	2.8276539737	7.2948886482	2.98906184713025E-13	1.53605621276732E-09
Contig83198	ref|XP_011869793.1| PREDICTED: thioredoxin-related transmembrane protein 2 homolog [Vollenhovia emeryi]	3.4894154694	20.6277960523	3.0312593971	6.8050250242	1.01031673600381E-11	1.01967659890808E-08
Contig122559	#N/A	0.404506044	20.6463285617	4.1988367521	4.9171543884	8.78112975592984E-07	0.0001398813
Contig49955	#N/A	0.4191894223	20.656220819	4.1835687586	4.9374641629	7.91449443526634E-07	0.0001286875
Contig38439	ref|XP_011647898.1| PREDICTED: restin homolog isoform X4 [Pogonomyrmex barbatus]	1.094726373	20.6584743675	4.1719581436	4.9517453571	7.35508087563258E-07	0.0001205627
Contig106881	ref|XP_011871627.1| PREDICTED: uncharacterized protein LOC105564088 [Vollenhovia emeryi]	0.8080696308	20.6628544731	4.1844326194	4.9380301591	7.89156404609464E-07	0.0001284625
Contig35109	ref|XP_011155882.1| PREDICTED: latrophilin Cirl-like [Solenopsis invicta]	3.3113547316	20.6707751224	4.1910577908	4.9321140758	8.1344384811063E-07	0.0001316577
Contig65884	ref|XP_017128962.1| PREDICTED: nicotinate-nucleotide--dimethylbenzimidazole phosphoribosyltransferase-like [Drosophila elegans]	0.6833603879	20.6802043734	4.2006939511	4.9230447669	8.52079504174994E-07	0.0001369696
Contig66421	ref|XP_011866458.1| PREDICTED: uncharacterized protein LOC105561260 isoform X1 [Vollenhovia emeryi]	1.083504707	20.6816750479	4.1904032473	4.9354856389	7.99515639047429E-07	0.0001298496
Contig111203	ref|XP_011639234.1| PREDICTED: kinesin-like protein KIF16B isoform X5 [Pogonomyrmex barbatus]	5.3330824921	20.6877432325	4.1700388875	4.9610432397	7.01155801388505E-07	0.0001166917
Contig23845	ref|XP_011051107.1| PREDICTED: uncharacterized protein LOC105144108 [Acromyrmex echinatior]	1.3730394206	20.6997745169	4.1736445467	4.9596400185	7.06239286571414E-07	0.0001172614
Contig530	#N/A	0.7315784023	20.7001751448	4.1846989905	4.9466342004	7.55076776623588E-07	0.000123627
Contig36668	#N/A	0.751883385	20.7171089927	4.199996958	4.9326485709	8.11220322333246E-07	0.0001314484
Contig126841	#N/A	0.3163435195	20.7203943679	4.20142164	4.9317579008	8.14928810955971E-07	0.0001317471
Contig145775	#N/A	0.492298829	20.7260172797	4.1729214878	4.9667882179	6.80708556595049E-07	0.0001139598
Contig142672	#N/A	0.3373679898	20.7268124385	4.1844615662	4.9532806338	7.29726145417543E-07	0.0001197539
Contig102726	#N/A	0.2231458199	20.7518828141	4.187211595	4.9560148426	7.19537218225742E-07	0.0001186093
Contig97862	ref|XP_012540636.1| PREDICTED: uncharacterized protein LOC105839115, partial [Monomorium pharaonis]	0.6107275403	20.7619595387	4.1909408725	4.954009176	0.000000727	0.0001194449
Contig112328	ref|XP_015185985.1| PREDICTED: uncharacterized protein LOC107071468 [Polistes dominula]	1.1598420532	20.7621085644	4.0566015215	5.1181040224	3.0862238215177E-07	6.01530903663415E-05
Contig127968	ref|XP_011877991.1| PREDICTED: aminopeptidase N-like isoform X1 [Vollenhovia emeryi]	0.3265559626	20.7655279636	4.1843741766	4.9626364868	6.95426644257344E-07	0.000116286
Contig87003	#N/A	0.3321273295	20.7771249109	4.1915607394	4.9568946277	7.1628798001282E-07	0.0001182352
Contig131248	ref|XP_011167488.1| PREDICTED: ER membrane protein complex subunit 1-like [Solenopsis invicta]	0.4359461643	20.7917008871	4.1787237575	4.9756102804	6.50423912046928E-07	0.0001103277
Contig138974	ref|XP_011883210.1| PREDICTED: uncharacterized protein LOC105570540 [Vollenhovia emeryi]	0.3403406596	20.7963610078	4.1841918248	4.9702217008	6.68763885666163E-07	0.0001123595
Contig25361	ref|XP_011865369.1| PREDICTED: 1-phosphatidylinositol 4,5-bisphosphate phosphodiesterase gamma-1 isoform X2 [Vollenhovia emeryi]	0.5227118242	20.8033769463	4.1924037513	4.9621597013	6.97136370991714E-07	0.0001162967
Contig99823	ref|XP_011874128.1| PREDICTED: uncharacterized protein LOC105565491 [Vollenhovia emeryi]	0.3923790982	20.8074108869	4.1793434833	4.9786314453	6.40354476235364E-07	0.0001090122
Contig115006	#N/A	0.5556319882	20.8170166823	4.1840662723	4.9753075902	6.51441136865048E-07	0.0001103677
Contig84897	#N/A	0.2873645081	20.8560995278	4.1921442476	4.9750433897	6.52330265630136E-07	0.000110386
Contig125405	#N/A	0.2946338813	20.8602926622	4.1794253059	4.9911868583	6.0009408606262E-07	0.0001034055
Contig38788	ref|XP_011879068.1| PREDICTED: aminopeptidase N-like [Vollenhovia emeryi]	0.4989293766	20.869865686	4.1786894483	4.9943567102	5.90322009182786E-07	0.0001020939
Contig132665	#N/A	0.5759198373	20.870371461	4.1935480352	4.9767813045	6.46502950636006E-07	0.0001097944
Contig45867	#N/A	0.3451229991	20.9231061017	4.2006931935	4.9808698559	0.000000633	0.000108019
Contig134797	ref|XP_012539055.1| PREDICTED: WASH complex subunit FAM21-like isoform X1 [Monomorium pharaonis]	0.3577261938	20.9254689013	4.1877740904	4.9967998391	5.82895145901558E-07	0.0001010569
Contig80317	ref|XP_012063938.1| PREDICTED: zinc transporter 1 [Atta cephalotes]	0.2940507559	20.9399229073	4.2004461288	4.9851664002	6.19085093615612E-07	0.0001062878
Contig134145	ref|XP_011692917.1| PREDICTED: PAX-interacting protein 1-like [Wasmannia auropunctata]	7.1159227127	20.9492744452	4.190167747	4.9996266761	5.74414236327517E-07	9.98314985859399E-05
Contig119853	#N/A	0.427316436	20.9508091602	4.1876285831	5.003024682	5.64377115930207E-07	9.82078735832394E-05
Contig35579	#N/A	0.4664702642	20.9557293079	4.1799112314	5.0134388382	5.34657675326244E-07	9.45038917077046E-05
Contig45236	#N/A	0.6109507936	20.9593742401	4.1924413254	4.9993244063	5.75315377081761E-07	9.9865278667717E-05
Contig98097	#N/A	0.3424753642	20.9797712935	4.186122708	5.0117430274	5.39392047558543E-07	0.000095084
Contig76124	#N/A	0.2904999499	20.9802399921	4.1863065537	5.0116348918	5.39695308105343E-07	0.000095084
Contig45504	ref|XP_011865367.1| PREDICTED: 1-phosphatidylinositol 4,5-bisphosphate phosphodiesterase gamma-1 isoform X1 [Vollenhovia emeryi]	2.0876584614	20.9853388696	4.1759877428	5.025239575	5.02804454015803E-07	8.93644791686427E-05
Contig101881	ref|XP_014488017.1| PREDICTED: uncharacterized protein LOC106751597 [Dinoponera quadriceps]	0.2272912399	21.0299604576	4.1926921402	5.0158608728	0.000000528	9.34835912362445E-05
Contig145918	#N/A	0.6579122091	21.0426707411	3.7743722131	5.5751445678	2.47324388034184E-08	7.83546951929732E-06
Contig96147	#N/A	0.3342539135	21.0492887606	4.2006930308	5.0109085825	5.41736467773957E-07	9.53247044670694E-05
Contig9094	ref|XP_011866034.1| PREDICTED: dihydrofolate reductase [Vollenhovia emeryi]	0.6838758552	21.0568052538	4.1819723111	5.0351374154	4.7750616287765E-07	8.58399342189863E-05
Contig121423	ref|XP_011880363.1| PREDICTED: uncharacterized protein LOC105568904 [Vollenhovia emeryi]	10.2377711847	21.0705623233	4.1917854288	5.0266318926	4.99169211365316E-07	8.89421337431086E-05
Contig135485	ref|XP_011685624.1| PREDICTED: 15-hydroxyprostaglandin dehydrogenase [NAD(+)]-like [Wasmannia auropunctata]	0.3983823165	21.073976178	4.1843937517	5.0363272265	4.74549044645776E-07	8.55706557670653E-05
Contig122368	ref|XP_011879066.1| PREDICTED: aminopeptidase N-like isoform X1 [Vollenhovia emeryi]	2.5906419169	21.0907028778	4.1907598073	5.0326680238	4.83700335073695E-07	0.000086843
Contig114256	ref|XP_011879181.1| PREDICTED: uncharacterized protein K02A2.6-like [Vollenhovia emeryi]	0.423304291	21.1142184965	4.1744521574	5.0579615481	4.23761851844814E-07	7.77614004936581E-05
Contig134012	ref|XP_011702646.1| PREDICTED: ribosomal protein S6 kinase 2 beta [Wasmannia auropunctata]	0.9956002626	21.1179906366	4.1999959312	5.0280978797	4.95369020356215E-07	8.87124923564919E-05
Contig103108	#N/A	0.2971839939	21.119793019	4.1859957925	5.0453450184	4.5270371812332E-07	8.22180941641012E-05
Contig118611	#N/A	0.3566077802	21.1224497071	4.1941018455	5.0362271793	4.7479701707311E-07	8.55706557670653E-05
Contig143962	#N/A	0.177265914	21.1235453178	4.1882488971	5.0435267427	0.000000457	8.26847715630958E-05
Contig73805	#N/A	1.7458142843	21.1243909246	4.1829449842	5.0501240166	4.41523325851821E-07	0.000080602
Contig31228	ref|XP_011880617.1| PREDICTED: xyloside xylosyltransferase 1 [Vollenhovia emeryi]	5.0077997657	21.1263738648	4.1748267201	5.0604193374	4.18335409606464E-07	7.71086383499452E-05
Contig123147	ref|XP_011698811.1| PREDICTED: dnaJ homolog dnj-5 [Wasmannia auropunctata]	0.8818083549	21.1327711651	3.612943339	5.8491842196	4.93989744455346E-09	2.18122715382209E-06
Contig113163	ref|XP_011644058.1| PREDICTED: uncharacterized protein LOC105431518 [Pogonomyrmex barbatus]	0.4163644623	21.1370483699	4.1781050863	5.0590035275	4.2145307080323E-07	7.75391335225052E-05
Contig107614	#N/A	0.3395192466	21.1388505582	4.1791975825	5.058112267	4.23427141041981E-07	7.77614004936581E-05
Contig115659	ref|XP_012232667.1| PREDICTED: uncharacterized protein LOC105678149 [Linepithema humile]	0.3920629586	21.1994335869	4.1857083631	5.0647182622	0.000000409	0.000075742
Contig132564	#N/A	0.2430706247	21.2126828621	4.1856881182	5.0679081344	4.02211426593086E-07	7.45817164610542E-05
Contig109804	ref|XP_011870354.1| PREDICTED: fatty acid synthase-like [Vollenhovia emeryi]	0.2083547536	21.2271521451	4.1882274783	5.0682901669	4.01405163104054E-07	0.00007453
Contig58399	#N/A	0.2992384331	21.2349419263	4.1862871899	5.0725000372	3.92623058941722E-07	7.33701956967263E-05
Contig102440	#N/A	0.3510669158	21.2434855015	4.1846131664	5.0765709175	3.84307399541477E-07	7.21135227530041E-05
Contig138167	ref|XP_011880329.1| PREDICTED: twitchin isoform X24 [Vollenhovia emeryi]	0.4099117999	21.2685398432	4.1841406759	5.0831321149	3.71261275147258E-07	6.99441391926428E-05
Contig104921	ref|XP_011869817.1| PREDICTED: acyl-CoA synthetase short-chain family member 3, mitochondrial isoform X2 [Vollenhovia emeryi]	0.2964249186	21.2769982454	4.1846286963	5.0845606121	3.68478086263409E-07	6.95124808474777E-05
Contig14743	ref|XP_011859278.1| PREDICTED: cytochrome P450 4C1-like [Vollenhovia emeryi]	0.2211804515	21.3088829889	4.1866168738	5.0897618844	3.58513417307016E-07	6.80871912973514E-05
Contig140512	ref|XP_011695770.1| PREDICTED: serine/threonine-protein kinase ICK isoform X3 [Wasmannia auropunctata]	0.6346943978	21.3124383703	4.1908704567	5.0854443225	3.66766416917571E-07	6.93748251823321E-05
Contig146962	#N/A	0.2198974603	21.315236281	4.1871906055	5.0905817979	0.000000357	6.7964277898129E-05
Contig109359	#N/A	0.2438746981	21.3184646943	4.1806938039	5.0992647858	0.000000341	6.5549368154382E-05
Contig128899	#N/A	0.293644084	21.3539457697	4.1836702397	5.1041178072	3.32341201275343E-07	6.41513862248663E-05
Contig141159	ref|XP_011693188.1| PREDICTED: E3 ubiquitin-protein ligase NEDD4 isoform X3 [Wasmannia auropunctata]	3.112028131	21.363355213	4.1907877304	5.0976944163	3.43815237814813E-07	6.58266418123572E-05
Contig40324	ref|XP_014473079.1| PREDICTED: RNA polymerase II degradation factor 1-like isoform X3 [Dinoponera quadriceps]	0.2656377996	21.3668986401	4.1924457438	5.0965235916	3.45947468879354E-07	6.60558642030353E-05
Contig115932	#N/A	0.1409677494	21.3683481102	4.1911437734	5.0984526576	3.42441151036113E-07	6.56525201057662E-05
Contig139684	#N/A	0.1409677494	21.3683481102	4.1911437734	5.0984526576	3.42441151036113E-07	6.56525201057662E-05
Contig125470	ref|XP_012532896.1| PREDICTED: probable Na(+)/H(+) antiporter nhx-9 isoform X2 [Monomorium pharaonis]	0.3783084529	21.3703181269	4.1791244164	5.1135874402	3.16097331710977E-07	6.14603769404997E-05
Contig108099	#N/A	0.3259825362	21.3875789309	4.1864669098	5.1087419037	3.24310999749536E-07	6.28589455851992E-05
Contig122292	ref|XP_011706916.1| PREDICTED: putative odorant receptor 71a [Wasmannia auropunctata]	0.3278340298	21.4712919041	4.1858159043	5.1295356497	2.90457763153318E-07	5.71599032872903E-05
Contig115429	#N/A	0.5970269727	21.4810222603	4.1798366573	5.1392013663	2.75908603996557E-07	5.51352989336123E-05
Contig135599	ref|XP_011861169.1| PREDICTED: mitogen-activated protein kinase-binding protein 1 isoform X4 [Vollenhovia emeryi]	5.4800502406	21.5193262901	4.1679889028	5.1629999004	0.000000243	4.96938623837239E-05
Contig122108	ref|XP_011704715.1| PREDICTED: HIG1 domain family member 1A, mitochondrial-like [Wasmannia auropunctata]	0.8855762749	21.5236530516	4.1825495938	5.1460604517	0.000000266	5.34664893200587E-05
Contig59003	ref|XP_011880714.1| PREDICTED: sideroflexin-3 [Vollenhovia emeryi]	1.9606220318	21.5458556828	4.1824494908	5.1514921412	2.5842205593375E-07	5.22378558473119E-05
Contig137181	ref|XP_011867345.1| PREDICTED: 5-hydroxytryptamine receptor 2A isoform X2 [Vollenhovia emeryi]	0.6589999964	21.5713769143	4.1776126888	5.1635655388	2.42289694079137E-07	4.96637998749711E-05
Contig141713	ref|XP_012059716.1| PREDICTED: CTD nuclear envelope phosphatase 1 homolog [Atta cephalotes]	0.2416762533	21.5804254714	4.1852740674	5.1562753415	2.51910394648221E-07	5.11410675755887E-05
Contig49850	ref|XP_012536964.1| PREDICTED: F-box only protein 7-like [Monomorium pharaonis]	0.4689381679	21.5814450509	4.1779929715	5.165505351	2.39790167849939E-07	4.93182406793201E-05
Contig117044	ref|XP_011690844.1| PREDICTED: Down syndrome cell adhesion molecule-like protein Dscam2 isoform X1 [Wasmannia auropunctata]	0.3236028665	21.5876729727	4.1805434543	5.1638436984	2.41929734500942E-07	4.96637998749711E-05
Contig95029	ref|XP_014614619.1| PREDICTED: sodium bicarbonate cotransporter 3 isoform X10 [Polistes canadensis]	0.4118445105	21.6060583972	4.1945925011	5.1509314413	2.59195933620795E-07	5.23194397611679E-05
Contig138186	ref|XP_012062298.1| PREDICTED: transport and Golgi organization protein 1 [Atta cephalotes]	0.7073589249	21.6178335081	4.173764455	5.1794569965	2.22532703173971E-07	4.70003039766407E-05
Contig131360	#N/A	0.3496785784	21.6178416661	4.1805071357	5.1711050752	2.32713658494166E-07	4.8426718415685E-05
Contig46577	#N/A	0.5332540587	21.626022873	4.1818997401	5.1713393952	2.32421984355713E-07	4.8426718415685E-05
Contig98861	#N/A	0.3817643289	21.6271870385	4.2020808794	5.146780288	0.000000265	5.33376845939927E-05
Contig67667	#N/A	0.8915325766	21.6354152026	3.7172266151	5.820311066	5.87382062436901E-09	2.53808328061611E-06
Contig89284	#N/A	0.3423123029	21.6363482046	4.191416137	5.1620615795	2.44244910500217E-07	4.98166616232837E-05
Contig124959	ref|XP_011701421.1| PREDICTED: cytochrome P450 4C1-like isoform X2 [Wasmannia auropunctata]	0.9647602199	21.6418660781	4.1844346635	5.1719928302	2.3161047369801E-07	4.83650866097824E-05
Contig106306	#N/A	0.1723791435	21.6467031311	4.1893530115	5.1670754581	2.37785281424064E-07	0.000049184
Contig94972	#N/A	0.3293773045	21.6503054689	4.1861463151	5.1718941096	2.31732900449569E-07	4.83650866097824E-05
Contig67541	ref|XP_011882584.1| PREDICTED: DNA polymerase epsilon catalytic subunit A [Vollenhovia emeryi]	0.4162916884	21.6517705931	4.1781797268	5.1821060866	2.19394362206974E-07	4.65864619768611E-05
Contig11275	#N/A	0.804846438	21.6601859656	3.1165464957	6.9500602657	3.65130197988812E-12	4.56564615798453E-09
Contig113907	#N/A	0.280424646	21.6677024036	4.1853567223	5.1770264379	2.25450278790849E-07	4.74745872463645E-05
Contig85521	ref|XP_011707925.1| PREDICTED: uncharacterized protein LOC105462763 isoform X2 [Wasmannia auropunctata]	0.2738184458	21.6910525926	4.1887089909	5.1784577634	2.23727711724082E-07	4.71821708708621E-05
Contig37399	ref|XP_012059510.1| PREDICTED: CCR4-NOT transcription complex subunit 10 [Atta cephalotes]	0.5628018817	21.6940281103	4.1798439836	5.1901525979	2.10121807713936E-07	4.51209438671064E-05
Contig147168	ref|XP_011156002.1| PREDICTED: dual oxidase maturation factor 1 [Solenopsis invicta]	0.8704319049	21.6999476132	4.1779611183	5.1939084637	2.0592441829438E-07	4.4490065033243E-05
Contig113383	ref|XP_011869413.1| PREDICTED: protein sickie-like [Vollenhovia emeryi]	0.3590733638	21.7019927255	4.2006939362	5.1662875361	2.38789354610322E-07	0.000049184
Contig120440	#N/A	0.2852115203	21.729958865	4.1862748289	5.1907626119	2.09434503968115E-07	4.50418068602476E-05
Contig105221	#N/A	0.3498160929	21.7300908786	4.1850564325	5.1923053438	2.07705986454612E-07	4.47381597074348E-05
Contig116966	ref|XP_011881813.1| PREDICTED: uncharacterized protein LOC105569733 [Vollenhovia emeryi]	0.4359486296	21.7303337118	4.182438303	5.1956136917	0.000000204	4.41516528672766E-05
Contig139370	ref|XP_011860561.1| PREDICTED: uncharacterized protein LOC105557810 [Vollenhovia emeryi]	0.555789431	21.7360759063	4.2006950178	5.1743999062	2.28644640958774E-07	4.79329404058634E-05
Contig115827	ref|XP_011159813.1| PREDICTED: transforming acidic coiled-coil-containing protein 3 isoform X1 [Solenopsis invicta]	0.5147967399	21.7367933413	4.1783573798	5.2022341235	1.96906946002319E-07	4.28695851298762E-05
Contig39308	ref|XP_012061458.1| PREDICTED: meckelin [Atta cephalotes]	0.4446119191	21.76170021	4.1992449862	5.182288788	2.191795020779E-07	4.65864619768611E-05
Contig141561	#N/A	0.2776193023	21.7690020085	4.1860461631	5.200373135	1.98888836255429E-07	4.32344552252052E-05
Contig341	#N/A	3.9616533441	21.8088146229	2.472091623	8.8220090309	1.12424183024298E-18	2.2693142555406E-14
Contig117020	#N/A	0.1799434204	21.8294517414	4.1930420815	5.2061132031	1.92837032714604E-07	4.20482935362276E-05
Contig150241	#N/A	0.1799434204	21.8294517414	4.1930420815	5.2061132031	1.92837032714604E-07	4.20482935362276E-05
Contig131241	#N/A	0.3241698769	21.8338014444	4.1808787029	5.2222996638	1.76714693476307E-07	3.91367649594385E-05
Contig142957	#N/A	1.0172638338	21.8556139489	4.1849189937	5.2224700124	1.76552155011057E-07	3.91367649594385E-05
Contig30651	#N/A	3.4766914978	21.8592011187	4.1907054126	5.2161149416	1.82714820733693E-07	4.02762184480634E-05
Contig140063	#N/A	0.9488628305	21.8648463738	4.1773536921	5.2341381615	1.65756436671222E-07	3.71170954553623E-05
Contig99566	ref|XP_011064823.1| PREDICTED: F-box/SPRY domain-containing protein 1 isoform X2 [Acromyrmex echinatior]	0.5609146822	21.873831303	4.1768507302	5.2369195636	1.63278808699382E-07	3.6795543592977E-05
Contig149729	ref|XP_011687006.1| PREDICTED: uncharacterized protein LOC105449452 [Wasmannia auropunctata]	1.2920837983	21.8827804352	4.1988373487	5.2116285099	1.87190103930645E-07	4.1006821883858E-05
Contig146486	ref|XP_011174423.1| PREDICTED: uncharacterized protein LOC105206641 [Solenopsis invicta]	0.3977934341	21.8834516265	4.1976919148	5.2132105144	1.8560006892587E-07	4.07216349984762E-05
Contig116859	#N/A	0.1693740878	21.8999907866	4.1899449367	5.2267967998	1.72471865576648E-07	3.83172282867668E-05
Contig121376	#N/A	0.4138888936	21.909892999	4.1836772315	5.2369941051	1.63212903523451E-07	3.6795543592977E-05
Contig115138	#N/A	0.2092814136	21.9498320736	4.1898374803	5.2388266077	1.61600778758253E-07	3.65339283779279E-05
Contig49297	ref|XP_011158862.1| PREDICTED: amyloid beta A4 precursor protein-binding family B member 2-like isoform X4 [Solenopsis invicta]	0.7778583011	21.9658846429	4.1832551177	5.2509072541	1.51351877244486E-07	3.45485722116544E-05
Contig138582	ref|XP_012533186.1| PREDICTED: nephrin isoform X1 [Monomorium pharaonis]	1.5804073271	21.9736842444	4.1844197294	5.2513097789	0.000000151	3.45289270421281E-05
Contig137293	ref|XP_011879569.1| PREDICTED: uncharacterized protein LOC105568477 isoform X1 [Vollenhovia emeryi]	0.7262743264	21.9761852779	4.1984647433	5.2343384121	1.65576848970011E-07	3.71170954553623E-05
Contig144485	ref|XP_011692346.1| PREDICTED: bifunctional glutamate/proline--tRNA ligase [Wasmannia auropunctata]	3.4842495567	21.9815757521	4.1979448479	5.2362707344	1.63853552678453E-07	3.68076556960371E-05
Contig86706	ref|XP_017017167.1| PREDICTED: transcription-repair-coupling factor-like [Drosophila kikkawai]	0.6517563956	21.9828443539	4.1919822929	5.244021281	1.57114066356002E-07	3.56909103438971E-05
Contig15547	ref|XP_011874173.1| PREDICTED: uncharacterized protein LOC105565515 isoform X1 [Vollenhovia emeryi]	2.2079878636	21.9934342326	4.1888990318	5.2504092521	1.51761656012278E-07	3.45862366283336E-05
Contig149167	#N/A	0.2113886629	22.0113407314	4.1866987997	5.2574454921	1.46070168712751E-07	3.35597993961067E-05
Contig144848	#N/A	0.2480050179	22.0193007334	4.1861931021	5.2599820879	1.44069435048579E-07	0.000033154
Contig67554	ref|XP_011169312.1| PREDICTED: eukaryotic translation initiation factor 4E transporter isoform X3 [Solenopsis invicta]	0.8342786604	22.020278444	4.1717028546	5.2784867982	1.3025504860651E-07	3.03206715040429E-05
Contig64652	ref|XP_011871455.1| PREDICTED: ankyrin repeat and BTB/POZ domain-containing protein BTBD11 isoform X4 [Vollenhovia emeryi]	2.9279935265	22.0246613835	4.1828693082	5.2654433502	1.39851440695006E-07	3.2341389551362E-05
Contig147125	#N/A	1.0294939733	22.0417043765	4.1777781476	5.2759394103	1.32077724821867E-07	0.000030644
Contig102380	ref|XP_015513310.1| PREDICTED: RNA-directed DNA polymerase homolog [Neodiprion lecontei]	0.6149061883	22.0445930485	4.1779786479	5.2763776233	1.31762432530157E-07	3.06211125480487E-05
Contig101242	#N/A	0.6401255476	22.0604944913	4.1997121736	5.2528586673	1.49756452531093E-07	3.43172564644504E-05
Contig101312	#N/A	0.2654375657	22.0666644799	4.1863001548	5.271161566	1.35563068985924E-07	3.14010737024658E-05
Contig139398	ref|XP_011157912.1| PREDICTED: methyltransferase-like protein 4 [Solenopsis invicta]	3.995571717	22.0856120223	3.5894445285	6.1529330924	7.60629005448764E-10	4.59293147790145E-07
Contig120559	ref|XP_011695601.1| PREDICTED: cytochrome b5-related protein-like [Wasmannia auropunctata]	0.2530811126	22.1031798553	4.1866542257	5.2794376282	1.29580978266002E-07	3.02634768364485E-05
Contig24117	ref|XP_012538298.1| PREDICTED: jmjC domain-containing protein 4 [Monomorium pharaonis]	10.9024095911	22.1043531196	3.5415336602	6.2414635129	4.33495566144815E-10	2.78416468225291E-07
Contig70558	#N/A	0.2882441395	22.1142692165	4.1893626545	5.2786714927	1.30123848581502E-07	3.03206715040429E-05
Contig35128	ref|XP_012533031.1| PREDICTED: regulating synaptic membrane exocytosis protein 2 isoform X1 [Monomorium pharaonis]	0.8488595946	22.1417329507	4.1765634319	5.3014238409	1.14902980759673E-07	2.71950527175872E-05
Contig146321	#N/A	0.2404897048	22.1460407285	4.1860893514	5.2903889214	1.22056532434535E-07	2.86482090754195E-05
Contig112245	#N/A	0.1828852555	22.1611365433	4.1883202857	5.2911752282	1.21532853145234E-07	2.85727579881234E-05
Contig138212	ref|XP_011168069.1| PREDICTED: uncharacterized protein LOC105201663 isoform X1 [Solenopsis invicta]	0.6706854953	22.178653523	4.1793456577	5.3067286937	1.11610107460318E-07	2.66475733654933E-05
Contig86605	ref|XP_012235579.1| PREDICTED: putative nuclease HARBI1 [Linepithema humile]	0.9101254533	22.1819836475	4.1794437963	5.3074008716	1.11199443846937E-07	2.66307590122724E-05
Contig14751	#N/A	0.469393542	22.1954201379	4.1847435572	5.3038901511	1.13360543726086E-07	2.6920176045151E-05
Contig82962	ref|XP_012536609.1| PREDICTED: putative hydroxypyruvate isomerase [Monomorium pharaonis]	0.3525561069	22.2022018265	4.1851571862	5.3049863693	1.12681415812586E-07	2.68039495119039E-05
Contig142363	#N/A	0.2883319163	22.2101760225	4.1853330837	5.3066686876	1.11646839157038E-07	2.66475733654933E-05
Contig24796	#N/A	0.1936092172	22.2104820668	4.1883058662	5.3029751829	1.1393041497029E-07	2.70101104766058E-05
Contig139153	#N/A	0.2927035594	22.2198105689	4.185930916	5.3082124418	1.10705567521346E-07	2.65574950323661E-05
Contig7688	ref|XP_011636058.1| PREDICTED: ras-related protein Rab-23 [Pogonomyrmex barbatus]	1.687071299	22.2268673305	3.2391395048	6.8619666728	6.7918911521046E-12	7.27025639484033E-09
Contig140851	#N/A	0.2074784159	22.2430675655	4.1872446117	5.3121013048	1.08368328909703E-07	2.61298972183521E-05
Contig32256	#N/A	0.7013009635	22.2565623458	4.191615162	5.3097819065	1.097564939387E-07	2.64195286610843E-05
Contig100453	#N/A	0.3207264027	22.2649370394	4.1871428734	5.3174533835	1.05229632253222E-07	2.54164638435617E-05
Contig129054	ref|XP_011158590.1| PREDICTED: uncharacterized protein YER152C-like [Solenopsis invicta]	1.5610639125	22.2688116099	4.1702347869	5.3399419332	0.000000093	2.28872478093696E-05
Contig130552	#N/A	0.6120261702	22.3242396489	4.1673799293	5.3569005053	8.46617096242818E-08	2.14380745246992E-05
Contig68174	ref|XP_011882019.1| PREDICTED: uncharacterized protein LOC105569853 [Vollenhovia emeryi]	0.7470977169	22.3291137387	4.1961523443	5.3213305683	0.000000103	2.50088464658028E-05
Contig91223	#N/A	0.2487104277	22.3431857077	4.1806039195	5.344487576	9.0673194825523E-08	2.24769305425648E-05
Contig102114	ref|XP_012058723.1| PREDICTED: adenylate cyclase type 8 [Atta cephalotes]	0.457229693	22.3517670271	4.1826497563	5.3439251023	0.000000091	2.25073408487437E-05
Contig8093	ref|XP_011703950.1| PREDICTED: retinol dehydrogenase 12-like [Wasmannia auropunctata]	1.3448223179	22.3574983323	4.1768095547	5.35276939	8.66182105343309E-08	2.1816209079981E-05
Contig112080	ref|XP_015510561.1| PREDICTED: macoilin-2 [Neodiprion lecontei]	1.054741762	22.3589225232	4.1795170076	5.3496426699	8.81280631675493E-08	2.20004080236488E-05
Contig111805	ref|XP_011067307.1| PREDICTED: long-chain fatty acid transport protein 4 [Acromyrmex echinatior]	0.4398669307	22.3805362174	4.1834967	5.3497200601	8.80903867799219E-08	2.20004080236488E-05
Contig145209	#N/A	0.1948147674	22.3806270245	4.1866386985	5.3457268794	9.00549156779624E-08	2.23628988058859E-05
Contig50011	ref|XP_012533462.1| PREDICTED: cAMP-specific 3',5'-cyclic phosphodiesterase, isoform F isoform X4 [Monomorium pharaonis]	1.3636445573	22.3932776352	4.1911768926	5.3429569328	9.14424951198739E-08	2.25883745331343E-05
Contig87214	ref|XP_011175423.1| PREDICTED: serine/arginine repetitive matrix protein 2 isoform X1 [Solenopsis invicta]	2.2329777483	22.395378223	4.1685158456	5.3725064393	7.76496557792942E-08	1.98395070219588E-05
Contig118392	ref|XP_011862332.1| PREDICTED: uncharacterized protein LOC105558964 [Vollenhovia emeryi]	0.2207166216	22.4295056757	4.1892518738	5.3540599495	0.000000086	2.16997739399952E-05
Contig73423	ref|XP_011064282.1| PREDICTED: uncharacterized protein LOC105151975 [Acromyrmex echinatior]	0.5403645187	22.4603688573	4.1851244141	5.3667147341	8.01837238086036E-08	2.04139092306023E-05
Contig101402	ref|XP_012529686.1| PREDICTED: centaurin-gamma-1A isoform X1 [Monomorium pharaonis]	1.3424087316	22.4663112968	4.1758877964	5.38000837	7.44823756719637E-08	1.9204628166645E-05
Contig75608	ref|XP_012533377.1| PREDICTED: ribonucleoside-diphosphate reductase subunit M2 B [Monomorium pharaonis]	0.338884706	22.5067372649	4.1862929987	5.3762928853	0.000000076	1.94982348846027E-05
Contig92429	ref|XP_012541125.1| PREDICTED: eukaryotic translation initiation factor 3 subunit C [Monomorium pharaonis]	0.4593968749	22.5382175385	4.1778216997	5.3947293969	6.86268992588671E-08	1.80573090960524E-05
Contig147165	ref|XP_011634607.1| PREDICTED: dual oxidase maturation factor 1 [Pogonomyrmex barbatus]	0.5153696163	22.5451686029	4.1834859383	5.3890867413	7.08166220069838E-08	1.8427580551972E-05
Contig102013	ref|XP_011698633.1| PREDICTED: DET1 homolog [Wasmannia auropunctata]	1.2678143069	22.5534936694	4.1981954801	5.3721875925	7.77871213837886E-08	1.98395070219588E-05
Contig135598	ref|XP_011861168.1| PREDICTED: uncharacterized protein LOC105558201 isoform X3 [Vollenhovia emeryi]	0.4416657816	22.5602774655	4.184278965	5.3916762372	6.98034520742731E-08	1.82310875558938E-05
Contig49215	#N/A	0.3442859001	22.5780615871	4.1857996351	5.3939661607	6.89192029892035E-08	1.80669325134796E-05
Contig126103	#N/A	0.2696298576	22.5787727549	4.1856818647	5.3942878328	6.87958624584248E-08	1.80669325134796E-05
Contig99702	#N/A	1.7731151485	22.6137606593	4.1803885102	5.4094878034	6.32052549530927E-08	1.69785416522949E-05
Contig128760	#N/A	0.2011454108	22.6258190486	4.1866659588	5.4042570559	6.50775609868955E-08	1.73168816097276E-05
Contig78721	ref|XP_011065681.1| PREDICTED: uncharacterized protein LOC105152859 isoform X2 [Acromyrmex echinatior]	0.4126953406	22.6403130097	4.1866235798	5.4077737294	6.38129708812399E-08	0.000017061
Contig94864	ref|XP_011862052.1| PREDICTED: secretin receptor isoform X2 [Vollenhovia emeryi]	0.6624542366	22.6979262648	4.1841944851	5.4246824199	5.80576708537165E-08	1.56552952645374E-05
Contig89653	#N/A	0.5831130694	22.7316143648	4.1705853146	5.4504614221	5.02393002604996E-08	1.39189458998192E-05
Contig99238	#N/A	0.2435902697	22.7353364702	4.186193837	5.4310281261	0.000000056	1.51665010575216E-05
Contig145442	ref|XP_011859273.1| PREDICTED: uncharacterized protein LOC105556769 [Vollenhovia emeryi]	0.3133975878	22.7640512574	4.1853354433	5.4390028149	5.35796087206717E-08	1.46151312227891E-05
Contig132359	ref|XP_012531100.1| PREDICTED: uncharacterized protein LOC105833706 [Monomorium pharaonis]	1.118618673	22.7890930989	4.1850242689	5.4453909069	5.16917369487212E-08	1.42098975790729E-05
Contig139565	#N/A	0.2301562107	22.7935944585	4.1904281321	5.4394428779	5.34474419339649E-08	1.46072789225212E-05
Contig131218	#N/A	0.2553176972	22.8315365504	4.1908305215	5.4479741983	5.09467465102142E-08	1.4059809456355E-05
Contig92129	#N/A	4.8928010408	22.8394061657	4.1979471799	5.4406130394	5.30975354967922E-08	1.4539772234671E-05
Contig94980	ref|XP_012060714.1| PREDICTED: UPF0553 protein C9orf64-like [Atta cephalotes]	0.2762336198	22.8550232048	4.1898469221	5.4548587645	0.000000049	1.36847372837628E-05
Contig122855	ref|XP_011863845.1| PREDICTED: glutamate receptor U1 isoform X1 [Vollenhovia emeryi]	2.3317660092	22.8767388088	4.0880614677	5.5959869952	2.19370145898811E-08	7.10925309749182E-06
Contig113374	#N/A	0.6841515474	22.8858330491	4.1991732341	5.4500807119	5.03469658913079E-08	1.39214779638828E-05
Contig83032	ref|XP_011637194.1| PREDICTED: intraflagellar transport protein 88 homolog [Pogonomyrmex barbatus]	1.1407702317	22.8883661559	4.190540394	5.4619127854	4.71031490164721E-08	0.000013258
Contig44619	ref|XP_015594147.1| PREDICTED: uncharacterized protein LOC107267231 [Cephus cinctus]	1.2226314604	22.8888598099	3.4699109566	6.5963824709	4.21311197993228E-11	3.58614508089452E-08
Contig19450	#N/A	0.1774417818	22.8906378558	4.18830711	5.4653675708	4.61948558664936E-08	1.31068163641927E-05
Contig123907	ref|XP_012061964.1| PREDICTED: glutamate receptor ionotropic, NMDA 2B-like [Atta cephalotes]	0.5421474977	22.8995758008	4.1889250799	5.4666950026	4.58503973444092E-08	1.30352587395835E-05
Contig84354	#N/A	0.4582816067	22.9018778691	4.1958546724	5.4582152284	4.80944455797321E-08	1.34566354001572E-05
Contig97257	ref|XP_012525245.1| PREDICTED: double-stranded RNA-binding protein Staufen homolog 2 isoform X3 [Monomorium pharaonis]	1.6797849192	22.9342920685	4.1775794663	5.4898517798	4.02271173170787E-08	1.15901660998666E-05
Contig124384	#N/A	0.2853902972	22.9549119071	4.1860228136	5.4837044443	4.16510417530274E-08	1.19338709776693E-05
Contig126249	#N/A	0.2813386963	22.9667830151	4.1884206805	5.483399297	4.17229825330236E-08	1.19338709776693E-05
Contig100100	#N/A	0.2907788803	22.9748704451	4.1851320019	5.489640574	4.02752468561576E-08	1.15901660998666E-05
Contig133047	#N/A	0.3577819273	23.003897432	4.1893819422	5.4910002834	0.00000004	1.15901660998666E-05
Contig74977	ref|XP_011859232.1| PREDICTED: uncharacterized protein LOC105556739 [Vollenhovia emeryi]	0.279744653	23.0167752858	4.1920095366	5.4906304685	4.0050151352689E-08	1.15901660998666E-05
Contig39636	#N/A	5.8987975165	23.0315057879	4.1979404511	5.4863822048	0.000000041	1.17818943424485E-05
Contig74280	ref|XP_011882433.1| PREDICTED: uncharacterized protein LOC105570082, partial [Vollenhovia emeryi]	5.944524629	23.0481821248	4.1979401834	5.4903550594	4.01126547832747E-08	1.15901660998666E-05
Contig146306	ref|XP_011881415.1| PREDICTED: uncharacterized protein LOC105569512 [Vollenhovia emeryi]	0.3326337752	23.0497517428	4.1851256382	5.5075411673	3.63880334075311E-08	1.06670538514189E-05
Contig69489	#N/A	0.6195770624	23.0624923688	4.1897991226	5.5044386841	0.000000037	1.08341252081654E-05
Contig145257	#N/A	0.2249522944	23.1146438445	4.1839295414	5.5246255024	0.000000033	9.86358038471741E-06
Contig113715	ref|XP_011705593.1| PREDICTED: uncharacterized protein LOC105460802 [Wasmannia auropunctata]	2.238958194	23.115814757	4.1703251144	5.5429286981	2.97454008504166E-08	9.10315114083137E-06
Contig86432	ref|XP_011862228.1| PREDICTED: DNA repair protein RAD51 homolog 4 [Vollenhovia emeryi]	0.6804980791	23.1325503904	4.1902812359	5.5205245395	3.37989185861741E-08	1.00119199150328E-05
Contig111496	ref|XP_011169952.1| PREDICTED: fatty acid synthase-like [Solenopsis invicta]	0.5394375049	23.1359631084	4.1853914202	5.5277895866	3.24290658194408E-08	9.72851319127287E-06
Contig106574	#N/A	0.501232933	23.1382121294	4.1744511062	5.5428154602	2.97646505379739E-08	9.10315114083137E-06
Contig109819	ref|XP_011058876.1| PREDICTED: protein argonaute-3 [Acromyrmex echinatior]	1.4776476042	23.1565685583	4.1763800259	5.5446507298	2.94541512171461E-08	9.06706580507428E-06
Contig115347	ref|XP_012062476.1| PREDICTED: LOW QUALITY PROTEIN: vitellogenin receptor-like [Atta cephalotes]	1.363414208	23.168801575	4.1860920221	5.5347090921	3.11745334067588E-08	9.43226562478545E-06
Contig139775	ref|XP_012543387.1| PREDICTED: putative nuclease HARBI1, partial [Monomorium pharaonis]	0.7599013074	23.1749745726	4.1751924909	5.5506361978	2.84631859721779E-08	0.000008839
Contig128178	ref|XP_011695492.1| PREDICTED: MATH and LRR domain-containing protein PFE0570w [Wasmannia auropunctata]	2.3522413277	23.1858324508	4.1986676594	5.5221880681	3.34803839577528E-08	9.94306314500905E-06
Contig138695	#N/A	0.2261740193	23.1995429497	4.1871961841	5.5405913479	3.01451939116248E-08	9.16005476157171E-06
Contig129558	ref|XP_011872159.1| PREDICTED: Golgi apparatus protein 1 [Vollenhovia emeryi]	0.342551434	23.2023657333	4.1853129372	5.5437588733	2.96046450323878E-08	9.09358158508979E-06
Contig93805	ref|XP_011864274.1| PREDICTED: Williams-Beuren syndrome chromosomal region 16 protein homolog [Vollenhovia emeryi]	5.2860766179	23.2111441748	4.1611978696	5.5779957844	2.43305550046784E-08	7.76034860157119E-06
Contig111585	#N/A	9.1912100376	23.216339243	4.1979222764	5.5304357047	3.19436366037375E-08	9.62375271044414E-06
Contig102657	#N/A	0.302870583	23.2199108799	4.1871324295	5.5455401211	2.9304812666901E-08	9.04079064496749E-06
Contig85231	#N/A	0.5678556244	23.2222273055	4.1767315099	5.5599042578	0.000000027	8.45659983877582E-06
Contig136934	#N/A	0.680529397	23.249123399	4.1908780838	5.54755422	0.000000029	8.95684895681926E-06
Contig48628	ref|XP_011868538.1| PREDICTED: vacuolar protein sorting-associated protein 72 homolog [Vollenhovia emeryi]	2.6763504844	23.3198224045	4.1980808638	5.5548768976	2.77807474034554E-08	8.66520146990295E-06
Contig81100	ref|XP_011647496.1| PREDICTED: LOW QUALITY PROTEIN: uncharacterized protein LOC105433746 [Pogonomyrmex barbatus]	0.9889487243	23.3252144428	4.1987444733	5.5552831545	2.77162097965962E-08	8.66419755670277E-06
Contig13100	ref|XP_011862336.1| PREDICTED: solute carrier organic anion transporter family member 3A1 [Vollenhovia emeryi]	0.6774724023	23.3277762925	4.1866277955	5.571972822	2.51870720274777E-08	7.96165037196089E-06
Contig119572	ref|XP_011882864.1| PREDICTED: peroxisomal hydratase-dehydrogenase-epimerase-like [Vollenhovia emeryi]	2.009580917	23.3515014378	3.246542167	7.1927300606	6.3508427866188E-13	1.53605621276732E-09
Contig22721	ref|XP_011055013.1| PREDICTED: probable phospholipid-transporting ATPase IA isoform X3 [Acromyrmex echinatior]	12.7432114663	23.3978236379	4.1902587537	5.5838612871	2.35236352501118E-08	7.54967472863197E-06
Contig117645	ref|XP_011706357.1| PREDICTED: uncharacterized protein LOC105461553 isoform X2 [Wasmannia auropunctata]	24.0365282686	23.4083471899	4.202323193	5.570334816	2.54250266636504E-08	8.01892855467368E-06
Contig41717	ref|XP_012537034.1| PREDICTED: limbic system-associated membrane protein-like [Monomorium pharaonis]	1.2305392242	23.4223708466	4.1760642325	5.6087190097	2.03829644754531E-08	6.70515149813205E-06
Contig101864	ref|XP_011867780.1| PREDICTED: cleft lip and palate transmembrane protein 1-like protein [Vollenhovia emeryi]	1.595489013	23.4368597734	4.1768279317	5.6111623837	2.00972066688102E-08	6.65029276506527E-06
Contig68470	ref|XP_011866550.1| PREDICTED: lysosomal-trafficking regulator isoform X5 [Vollenhovia emeryi]	7.0649082264	23.4606725561	4.1848502795	5.6060960343	2.06941169143895E-08	6.77161673788632E-06
Contig49035	#N/A	0.3203155335	23.4690414334	4.1845270831	5.6085289848	2.04053528680494E-08	6.70515149813205E-06
Contig60000	ref|XP_011859544.1| PREDICTED: uncharacterized protein LOC105557028 [Vollenhovia emeryi]	0.4250879109	23.4987888825	4.1781599308	5.6241956439	1.86374331477048E-08	0.0000063
Contig74928	#N/A	0.4505317478	23.5114230377	4.2006958697	5.5970305318	2.18054317964558E-08	7.08285539435361E-06
Contig127191	#N/A	0.5669517198	23.5215155961	4.1790655485	5.6284150902	1.81872992492164E-08	6.20727251694813E-06
Contig111553	ref|XP_012540604.1| PREDICTED: vesicle transport through interaction with t-SNAREs homolog 1A [Monomorium pharaonis]	1.9060214156	23.5217619351	4.1894614835	5.6145072648	1.9712314775927E-08	6.55362574328037E-06
Contig108996	#N/A	6.3142346647	23.5316470878	4.1900245494	5.6161119847	1.95302111568544E-08	6.53846094956682E-06
Contig126467	ref|XP_012524177.1| PREDICTED: serine protease snake-like [Monomorium pharaonis]	0.2426266172	23.5327921826	4.1861923793	5.6215266882	1.89277250573918E-08	6.35256714354937E-06
Contig69978	ref|XP_012058965.1| PREDICTED: leukotriene A-4 hydrolase [Atta cephalotes]	1.7515629238	23.5334766484	4.1981953404	5.6056173523	2.07513963318738E-08	6.77161673788632E-06
Contig146732	#N/A	0.3402454291	23.5390380782	4.1858030722	5.6235416889	1.8708158841179E-08	6.30884658659205E-06
Contig121443	#N/A	0.2808942451	23.553162826	4.1860173142	5.6266281427	1.83766285172714E-08	6.23744417573812E-06
Contig30533	ref|XP_011883494.1| PREDICTED: zinc transporter ZIP9-A [Vollenhovia emeryi]	1.7800146949	23.569486245	4.1708898082	5.6509491569	0.000000016	5.58068193965471E-06
Contig144767	#N/A	0.2026169359	23.5838937581	4.186399671	5.6334549044	1.76634721260136E-08	6.07249542819792E-06
Contig59396	#N/A	1.4162604665	23.5951274336	4.1765562646	5.649421662	1.60988527456575E-08	5.61659159605721E-06
Contig109512	ref|XP_011058599.1| PREDICTED: LOW QUALITY PROTEIN: protein groucho-like [Acromyrmex echinatior]	0.441752906	23.6321011988	4.1865510947	5.6447659814	1.65406080748504E-08	5.72828014498073E-06
Contig74085	ref|XP_011051135.1| PREDICTED: adenosine deaminase-like protein [Acromyrmex echinatior]	0.5596154482	23.6532519175	4.2006920341	5.6307988601	1.79376822802164E-08	6.15179779890228E-06
Contig141439	#N/A	0.1831026512	23.6780170811	4.1893407506	5.6519673358	1.58621739237886E-08	5.57531738534717E-06
Contig66987	ref|XP_012056988.1| PREDICTED: protein aurora borealis [Atta cephalotes]	1.9842189245	23.7179535824	4.1695188347	5.688415024	1.28223889654514E-08	4.68156354948677E-06
Contig106606	#N/A	0.4138989173	23.7314267304	4.1840171443	5.671923874	1.41202724357977E-08	5.08967381214517E-06
Contig32614	ref|XP_011061588.1| PREDICTED: uncharacterized protein LOC105150294 [Acromyrmex echinatior]	1.7083507792	23.7542747431	4.1989538002	5.6571888793	1.53872398824319E-08	5.43542708416995E-06
Contig149694	ref|XP_011875837.1| PREDICTED: exocyst complex component 1 [Vollenhovia emeryi]	1.3763184944	23.7627732913	4.1758435912	5.6905324091	1.26643871311774E-08	4.64685287382097E-06
Contig129451	ref|XP_006557602.1| PREDICTED: uncharacterized protein LOC100576830 [Apis mellifera]	0.4639878432	23.7935804008	4.1746205711	5.6995791582	0.000000012	4.48618013242778E-06
Contig143763	ref|XP_011163989.1| PREDICTED: RNA-binding protein 48 [Solenopsis invicta]	1.2905218269	23.7936883795	4.175814057	5.6979760245	1.21238095576585E-08	4.49621501067842E-06
Contig111952	ref|XP_011687642.1| PREDICTED: solute carrier family 35 member F5 isoform X2 [Wasmannia auropunctata]	0.6441011128	23.7948614855	4.1715033926	5.7041453035	1.16928302497832E-08	0.000004394
Contig115412	ref|XP_011170453.1| PREDICTED: L-asparaginase-like [Solenopsis invicta]	1.486746005	23.8125985894	4.1875378255	5.6865393417	0.000000013	4.72105074342608E-06
Contig144800	ref|XP_011869574.1| PREDICTED: IQ and AAA domain-containing protein 1-like [Vollenhovia emeryi]	0.7343039956	23.841024536	4.1723343838	5.7140733084	0.000000011	0.000004201
Contig26417	ref|XP_012541811.1| PREDICTED: uncharacterized protein LOC105839802 [Monomorium pharaonis]	2.8641573186	23.8516905264	4.1907447331	5.6915159585	1.25916384941732E-08	4.63323110497704E-06
Contig136840	ref|XP_011864607.1| PREDICTED: la-related protein 6 [Vollenhovia emeryi]	1.0534395	23.8539713152	4.1762658162	5.7117943074	1.117911596078E-08	4.24617082771596E-06
Contig23041	ref|XP_011051107.1| PREDICTED: uncharacterized protein LOC105144108 [Acromyrmex echinatior]	0.3412293591	23.8869190473	4.1873502676	5.7045428543	1.16655743143535E-08	0.000004394
Contig41727	ref|XP_011159588.1| PREDICTED: ATP-dependent DNA helicase 2 subunit 1-like [Solenopsis invicta]	11.5232323578	23.9060108674	4.1979245701	5.6947213958	1.23573539607339E-08	4.57082995442362E-06
Contig142773	ref|XP_011690773.1| PREDICTED: ELKS/Rab6-interacting/CAST family member 1 [Wasmannia auropunctata]	2.7373429152	23.9122192014	3.7047074358	6.4545499518	1.08540972942993E-10	7.98776763225314E-08
Contig61082	ref|XP_014473234.1| PREDICTED: uncharacterized protein LOC106743678, partial [Dinoponera quadriceps]	11.1574154575	23.9250431636	4.1979250765	5.6992544478	0.000000012	4.48618013242778E-06
Contig135334	ref|XP_011705118.1| PREDICTED: UDP-glucuronosyltransferase 2B19-like, partial [Wasmannia auropunctata]	0.9190688777	23.93435129	4.1802708174	5.7255504094	1.03098925576535E-08	4.00207936461199E-06
Contig136327	#N/A	0.2554971536	23.9356534135	4.178579471	5.7281795355	1.01514100962777E-08	3.96233091815953E-06
Contig149243	#N/A	0.3522538058	23.9377347671	4.184649028	5.7203685677	1.06293224714975E-08	4.10352835315623E-06
Contig51293	#N/A	0.3236147065	23.9705535309	4.1871007752	5.7248570832	1.03520850167535E-08	4.00744810030744E-06
Contig16722	ref|XP_012525555.1| PREDICTED: uncharacterized protein LOC105830644 [Monomorium pharaonis]	6.3187815537	23.9754178533	4.1839567561	5.7303216192	0.00000001	3.92345335813935E-06
Contig126985	ref|XP_012230769.1| PREDICTED: uncharacterized protein LOC105677038 isoform X1 [Linepithema humile]	1.3886549367	24.042796127	4.1627275706	5.775731349	7.66195421839356E-09	3.13307736763422E-06
Contig136545	#N/A	0.2777574944	24.0549372764	4.1860281006	5.7464825124	9.11190498888662E-09	3.58630874433068E-06
Contig72538	ref|XP_012057853.1| PREDICTED: cytoplasmic dynein 1 light intermediate chain 2 [Atta cephalotes]	2.4319312626	24.0623207212	3.8425791918	6.2620233755	3.80013955844271E-10	2.48587184809852E-07
Contig101368	#N/A	0.342172439	24.0743561575	4.1856297826	5.751668783	8.8366797336464E-09	3.49746872920178E-06
Contig84194	ref|XP_011693777.1| PREDICTED: nucleolar protein 6 [Wasmannia auropunctata]	1.6963153029	24.0859465576	4.1753968093	5.7685407298	0.000000008	3.24661889211803E-06
Contig108940	#N/A	0.2022410783	24.0932375261	4.1838776715	5.758590336	8.48192713263894E-09	3.39510158090789E-06
Contig102905	ref|XP_011637194.1| PREDICTED: intraflagellar transport protein 88 homolog [Pogonomyrmex barbatus]	1.6776469178	24.123478553	4.1768579068	5.77550855	7.67210039279984E-09	3.13307736763422E-06
Contig37508	#N/A	1.5163979631	24.1913684381	4.1700029501	5.8012832911	6.58093083561766E-09	2.79238974258339E-06
Contig147995	ref|XP_011862594.1| PREDICTED: supervillin-like isoform X1 [Vollenhovia emeryi]	0.7914737321	24.1933627917	4.1991038897	5.761553757	8.33431094187758E-09	3.35463778351087E-06
Contig121767	#N/A	0.3913526523	24.2123022159	4.1865580316	5.7833432699	7.32304153385635E-09	3.04330529296853E-06
Contig127253	ref|XP_012532247.1| PREDICTED: cyclin-dependent kinase 8 isoform X1 [Monomorium pharaonis]	2.3108085247	24.2152206934	4.1984301152	5.7676845938	0.000000008	3.25380008674011E-06
Contig43031	#N/A	1.0807344325	24.2432008815	4.1856792714	5.7919394463	0.000000007	2.90863763848256E-06
Contig125577	ref|XP_011635424.1| PREDICTED: cyclin-dependent kinase 10 [Pogonomyrmex barbatus]	1.4298530324	24.2914770443	4.1791955767	5.8124767311	6.15552421946973E-09	2.63562759284368E-06
Contig26418	ref|XP_012541811.1| PREDICTED: uncharacterized protein LOC105839802 [Monomorium pharaonis]	1.2774983265	24.3053523216	4.192587703	5.7972197706	6.74233111596978E-09	2.83533083242018E-06
Contig143800	#N/A	0.4269582973	24.3118885061	4.1865684091	5.8071160269	6.35580936423277E-09	0.000002705
Contig122956	ref|XP_011053826.1| PREDICTED: protein C10 [Acromyrmex echinatior]	1.1617106814	24.3141568578	4.1753985548	5.8231942505	5.77333855656046E-09	2.509794316471E-06
Contig143645	#N/A	0.3347068851	24.3732134507	4.1851375487	5.8237544566	5.75400973233379E-09	2.50933429984434E-06
Contig108924	ref|XP_011698849.1| PREDICTED: uncharacterized protein LOC105456477 [Wasmannia auropunctata]	0.7602021583	24.5063408162	4.1786104595	5.8647105429	4.49916873281891E-09	2.00542285312654E-06
Contig127517	ref|XP_014759087.1| uncharacterized protein Dana_GF28135, partial [Drosophila ananassae]	0.4335268327	24.5120072208	4.1751347196	5.8709500092	4.33304925121092E-09	1.95606025574553E-06
Contig26629	#N/A	0.2240579469	24.5784730482	4.1892862955	5.8669833749	4.43795154318292E-09	0.000001988
Contig103900	#N/A	0.4494963194	24.5853950947	4.1900596903	5.8675524723	4.42275063992813E-09	0.000001988
Contig117332	ref|XP_011873981.1| PREDICTED: translational activator GCN1 [Vollenhovia emeryi]	2.57768816	24.5870919333	3.4329292018	7.1621319543	7.94319056233095E-13	1.53605621276732E-09
Contig128809	#N/A	0.2038080725	24.5927072681	4.1855874357	5.8755688767	4.21393709253086E-09	1.91655088762332E-06
Contig87759	ref|XP_012530613.1| PREDICTED: apyrase [Monomorium pharaonis]	1.2130433561	24.6295993473	4.1982164438	5.8666816437	4.4460315595874E-09	0.000001988
Contig66042	ref|XP_011858819.1| PREDICTED: uncharacterized protein LOC105556345 [Vollenhovia emeryi]	1.2773498045	24.6745766026	4.1867975872	5.8934247688	3.78272361247939E-09	1.74669117082516E-06
Contig138975	#N/A	0.3415168025	24.6885950717	4.191940615	5.889538364	3.87275899227162E-09	1.77665333549027E-06
Contig132621	#N/A	0.1789915453	24.7097934569	4.1899567134	5.8973863328	3.69304501401937E-09	1.71087272572425E-06
Contig39614	ref|XP_011872760.1| PREDICTED: threonine aspartase 1 isoform X1 [Vollenhovia emeryi]	0.6539052704	24.7437049428	4.1771018966	5.9236536612	3.14866235708999E-09	0.000001503
Contig115533	#N/A	0.3932226906	24.755561879	4.1954534661	5.9005688131	3.62250491102957E-09	1.68927087925328E-06
Contig18911	ref|XP_011860161.1| PREDICTED: uncharacterized protein LOC105557513, partial [Vollenhovia emeryi]	1.2628231145	24.7775813183	4.1981269137	5.9020562808	3.58998645302342E-09	1.68523028522542E-06
Contig106099	#N/A	0.6837036529	24.7890419368	4.1672341113	5.9485599501	2.70511811273694E-09	1.34586293653307E-06
Contig145468	ref|XP_015109496.1| PREDICTED: uncharacterized protein LOC107036217 [Diachasma alloeum]	1.0201195623	24.8233630926	4.1832166157	5.934037219	0.000000003	1.4501329790236E-06
Contig137772	#N/A	0.2648427573	24.8280489934	4.1871738739	5.9295481251	0.000000003	1.46639056058676E-06
Contig80540	ref|XP_011705067.1| PREDICTED: sodium-coupled monocarboxylate transporter 1-like [Wasmannia auropunctata]	3.4767176332	24.8380875527	4.1891767055	5.929109536	0.000000003	1.46639056058676E-06
Contig41445	ref|XP_012060268.1| PREDICTED: protein PAT1 homolog 1 [Atta cephalotes]	1.7139509668	24.8659237894	4.1752543245	5.9555471013	2.59203231000801E-09	1.29415685267562E-06
Contig110585	ref|XP_008550978.1| PREDICTED: brahma-associated protein of 60 kDa isoform X1 [Microplitis demolitor]	3.758693777	24.9914661179	3.6723532071	6.805300228	1.00838719501783E-11	1.01967659890808E-08
Contig30345	ref|XP_011862220.1| PREDICTED: helicase domino-like isoform X5 [Vollenhovia emeryi]	1.3152432445	25.0056910501	4.1765597752	5.9871502854	2.13549450201131E-09	1.10527094011242E-06
Contig147738	ref|XP_011695211.1| PREDICTED: golgin subfamily A member 2 [Wasmannia auropunctata]	0.9510574845	25.0283155073	4.1984304244	5.961350547	2.50161655435839E-09	1.25790360954155E-06
Contig102108	ref|XP_015125562.1| PREDICTED: insertion sequence IS21 putative ATP-binding protein-like [Diachasma alloeum]	0.2690206741	25.0341138052	4.1851815943	5.9816075458	2.20946101221803E-09	1.13112395885279E-06
Contig124655	ref|XP_011630137.1| PREDICTED: LOW QUALITY PROTEIN: uncharacterized protein LOC105422469 [Pogonomyrmex barbatus]	0.24914887	25.054873304	4.1863058044	5.9849601234	2.1644288232173E-09	1.11615802713188E-06
Contig117592	#N/A	0.3896329726	25.0641162905	4.1861961652	5.9873248413	2.13320471838669E-09	1.10527094011242E-06
Contig109744	ref|XP_011056420.1| PREDICTED: plancitoxin-1 [Acromyrmex echinatior]	0.4289070422	25.0663385884	4.1842412522	5.9906532816	2.08999785183853E-09	1.08970637074254E-06
Contig136745	#N/A	0.5278490601	25.1110122162	4.1839538746	6.0017421245	0.000000002	1.02538322540293E-06
Contig123991	ref|XP_011695884.1| PREDICTED: uncharacterized protein LOC105454729 isoform X1 [Wasmannia auropunctata]	0.4367403673	25.1237910714	4.1764543728	6.0155789645	1.79244899835019E-09	9.48568037902196E-07
Contig137499	ref|XP_011870308.1| PREDICTED: putative pre-mRNA-splicing factor ATP-dependent RNA helicase DHX16 [Vollenhovia emeryi]	3.1557820626	25.1239172751	3.1740715018	7.9153595819	2.46539504183796E-15	3.87058803585088E-11
Contig109619	ref|XP_011879565.1| PREDICTED: arrestin domain-containing protein 2-like isoform X1 [Vollenhovia emeryi]	1.7423011892	25.1801895636	3.2770993343	7.683682121	1.54579949508298E-14	1.82014026047283E-10
Contig100213	#N/A	0.623964699	25.1888986688	4.1687029385	6.0423827364	1.51854711329966E-09	8.28399404298532E-07
Contig89758	ref|XP_011068067.1| PREDICTED: 15-hydroxyprostaglandin dehydrogenase [NAD(+)]-like [Acromyrmex echinatior]	3.3616409953	25.2355964309	4.1842408471	6.0311051283	1.62842205419622E-09	8.7821049996856E-07
Contig131963	ref|XP_011061859.1| PREDICTED: cubilin isoform X2 [Acromyrmex echinatior]	43.1311897511	25.2829129826	4.1745544273	6.0564339075	1.3917228323046E-09	7.65160548778768E-07
Contig112307	ref|XP_011167852.1| PREDICTED: solute carrier family 2, facilitated glucose transporter member 1-like isoform X1 [Solenopsis invicta]	0.4549579473	25.2836838598	4.184814586	6.0417691967	1.5243341692861E-09	8.28399404298532E-07
Contig119741	ref|XP_014475521.1| PREDICTED: carbonic anhydrase-related protein 10 isoform X1 [Dinoponera quadriceps]	0.6446995407	25.3085118616	4.1835641511	6.0495096877	1.4528732852485E-09	7.9568463792929E-07
Contig70322	ref|XP_011871987.1| PREDICTED: neurophysin 1-like [Vollenhovia emeryi]	0.8996329442	25.3723192078	4.1744405236	6.0780166981	1.21678087284924E-09	6.8689946726257E-07
Contig82759	ref|XP_012216311.1| PREDICTED: rab-like protein 3 [Linepithema humile]	0.5537830251	25.387623944	4.1834504348	6.0685848535	1.29042232142469E-09	7.17845680119469E-07
Contig106633	#N/A	0.1554865394	25.4964669693	4.196056669	6.0762923337	1.22993103333709E-09	6.8689946726257E-07
Contig129588	#N/A	0.1554865394	25.4964669693	4.196056669	6.0762923337	1.22993103333709E-09	6.8689946726257E-07
Contig144180	#N/A	0.1554865394	25.4964669693	4.196056669	6.0762923337	1.22993103333709E-09	6.8689946726257E-07
Contig130201	#N/A	0.3737941242	25.5103918954	4.184968998	6.0957182496	1.08947157092851E-09	6.25768555111733E-07
Contig37723	ref|XP_011685440.1| PREDICTED: ecdysone 20-monooxygenase isoform X1 [Wasmannia auropunctata]	0.8698438943	25.6376053418	4.1839434546	6.1276175504	8.92046909318726E-10	5.25181467275033E-07
Contig117809	ref|XP_011695784.1| PREDICTED: arylphorin subunit alpha-like [Wasmannia auropunctata]	6.3254116278	25.6698531008	4.1727525751	6.1517793443	7.66184285240926E-10	4.60678897666754E-07
Contig135091	ref|XP_011697210.1| PREDICTED: beta-glucuronidase isoform X3 [Wasmannia auropunctata]	0.4840352901	25.6809029007	4.1854187856	6.1358024648	8.47303883235465E-10	5.00926764809713E-07
Contig113987	ref|XP_011697513.1| PREDICTED: N-acetyl-D-glucosamine kinase isoform X2 [Wasmannia auropunctata]	1.183674808	25.6918219972	4.1829505168	6.1420334508	8.14716943886765E-10	4.87784152628679E-07
Contig136609	ref|XP_011862052.1| PREDICTED: secretin receptor isoform X2 [Vollenhovia emeryi]	3.2250469053	25.7138782221	4.1601288346	6.1810293009	6.36849937344769E-10	3.89545392194822E-07
Contig22946	ref|XP_014246261.1| PREDICTED: retrovirus-related Pol polyprotein from transposon TNT 1-94 [Cimex lectularius]	17.1470178676	25.8123331662	4.1836923159	6.1697494025	6.83983096304326E-10	4.14784375787607E-07
Contig67652	ref|XP_014476457.1| PREDICTED: sodium-dependent nutrient amino acid transporter 1-like [Dinoponera quadriceps]	0.803529094	25.8787474532	4.1779982512	6.1940541611	5.86360631594822E-10	3.60221731141102E-07
Contig134594	ref|XP_011698878.1| PREDICTED: protein phosphatase 1 regulatory subunit 12A-like isoform X3 [Wasmannia auropunctata]	3.5352830331	25.8828005259	4.1749592886	6.199533633	5.66307151914191E-10	0.000000351
Contig141196	ref|XP_011173318.1| PREDICTED: protein Wnt-11b-1-like [Solenopsis invicta]	0.6880701124	25.9574964303	4.1800907045	6.2097926254	5.30545674283227E-10	3.3170138114689E-07
Contig129644	#N/A	0.2880552438	26.1104466819	4.1856395926	6.2381019923	4.42911858114021E-10	2.81901427098814E-07
Contig90651	ref|XP_012524535.1| PREDICTED: elongation of very long chain fatty acids protein AAEL008004 [Monomorium pharaonis]	0.4581549704	26.1341512169	4.1827374744	6.2480974187	4.15482518623942E-10	2.68065906091357E-07
Contig21800	ref|XP_012057200.1| PREDICTED: pre-mRNA-processing factor 39 [Atta cephalotes]	3.5460149072	26.2081216376	4.1748397616	6.2776353428	3.43760990735802E-10	0.000000228
Contig55015	#N/A	0.5052810235	26.4164354211	4.1772461633	6.3238876495	2.55063206991832E-10	1.75803248577195E-07
Contig78373	ref|XP_012529328.1| PREDICTED: glycogen [starch] synthase-like isoform X2 [Monomorium pharaonis]	0.2853024324	26.4174179045	4.1837020968	6.3143639994	2.71274761000653E-10	1.83398611986169E-07
Contig105620	ref|XP_011861289.1| PREDICTED: neprilysin-like isoform X2 [Vollenhovia emeryi]	13.5850412922	26.4703304606	4.1747104605	6.340638641	2.28814657605322E-10	1.59265146185513E-07
Contig136450	#N/A	0.3860975024	26.5410213434	4.1792355568	6.3506880582	2.14353985656201E-10	1.49938490649823E-07
Contig124139	#N/A	0.7548398231	26.5898000291	4.1954311033	6.3377992332	2.33070253487611E-10	1.6143199807372E-07
Contig87828	ref|XP_006624706.1| PREDICTED: CTD small phosphatase-like protein 2-like isoform X4 [Apis dorsata]	0.6336377358	26.6505946692	4.1844310887	6.3689887834	1.90278521988843E-10	1.33760121002276E-07
Contig140097	ref|XP_011863749.1| PREDICTED: THUMP domain-containing protein 3-like [Vollenhovia emeryi]	3.3190695663	26.7805939897	2.8654057004	9.3461787927	9.08715128534902E-21	4.27995738388654E-16
Contig120461	ref|XP_011631250.1| PREDICTED: cardioacceleratory peptide receptor [Pogonomyrmex barbatus]	0.2894574812	26.7894191947	4.1805097663	6.4081704606	1.47276196875046E-10	1.04571280351022E-07
Contig116695	ref|XP_011861622.1| PREDICTED: DNA mismatch repair protein Msh2, partial [Vollenhovia emeryi]	3.0984927622	26.9755603084	4.1823206626	6.4499024548	1.11922165147189E-10	8.19392029471623E-08
Contig109857	ref|XP_016841934.1| PREDICTED: metallophosphoesterase MPPED2 [Nasonia vitripennis]	0.6145803736	27.1027947964	4.1768723091	6.488777437	8.65356874444528E-11	6.53862728814912E-08
Contig134194	ref|XP_011639574.1| PREDICTED: uncharacterized protein LOC105428780 [Pogonomyrmex barbatus]	0.5842473765	27.1164689331	4.188645192	6.4738042232	9.55657109438587E-11	7.14452288848381E-08
Contig100151	#N/A	0.8903469282	27.222176419	4.1830382094	6.5077522739	7.62835773865327E-11	5.79496808278759E-08
Contig134532	ref|XP_012531277.1| PREDICTED: uncharacterized protein LOC105833810 [Monomorium pharaonis]	5.1994859068	27.2443691152	4.1669247855	6.5382435532	6.22455024805403E-11	4.88616820221828E-08
Contig52278	#N/A	0.7224129522	27.3051336585	4.1784088239	6.5348161966	6.36877068876193E-11	4.94444061543953E-08
Contig71123	ref|XP_012147427.1| PREDICTED: RNA binding protein fox-1 homolog 2 [Megachile rotundata]	1.7755259936	27.3481284017	4.1617594133	6.5712900929	4.98811689895863E-11	4.07402285244022E-08
Contig108590	ref|XP_011067034.1| PREDICTED: WD repeat-containing protein 6 isoform X1 [Acromyrmex echinatior]	2.4194859711	27.3618151625	4.1775422825	6.5497398499	5.7637400472803E-11	4.64541700203157E-08
Contig83681	ref|XP_011883673.1| PREDICTED: uncharacterized protein LOC105570832 [Vollenhovia emeryi]	0.4988006218	27.3774854298	4.1853211182	6.5413106084	6.09820265299902E-11	4.8407738216899E-08
Contig133803	#N/A	0.486020738	27.3881037608	4.1933899114	6.5312561769	6.52203314710581E-11	5.00838976949245E-08
Contig63061	ref|XP_011695732.1| PREDICTED: protein bicaudal C isoform X2 [Wasmannia auropunctata]	4.8286426557	27.4198998403	4.1867842351	6.5491552229	5.78634643592969E-11	4.64541700203157E-08
Contig12584	ref|XP_011160878.1| PREDICTED: uncharacterized protein LOC105196565 [Solenopsis invicta]	0.8027720146	27.4998827075	4.1843051426	6.5721503979	4.95937304111875E-11	4.07402285244022E-08
Contig109600	ref|XP_012528039.1| PREDICTED: intraflagellar transport protein 80 homolog [Monomorium pharaonis]	1.377395495	27.5042343549	4.1846603077	6.5726325036	4.94333620105373E-11	4.07402285244022E-08
Contig130294	ref|XP_012062139.1| PREDICTED: follistatin-A, partial [Atta cephalotes]	0.3258862623	27.5296165054	4.1826170914	6.5819117323	4.64437301102905E-11	3.86021160787866E-08
Contig117678	#N/A	0.4165579554	27.5780792746	4.1782330274	6.6004167536	4.10003562207753E-11	3.51104686844054E-08
Contig134589	#N/A	0.3460608842	27.6408198189	4.1841369214	6.6060983037	3.9458093103791E-11	0.000000034
Contig102842	ref|XP_011054017.1| PREDICTED: aldehyde dehydrogenase, dimeric NADP-preferring isoform X6 [Acromyrmex echinatior]	25.8165994156	27.6552213449	4.1743710587	6.6250031337	3.47240812568999E-11	3.01006657015717E-08
Contig45419	ref|XP_011174978.1| PREDICTED: cystinosin homolog isoform X3 [Solenopsis invicta]	3.4116662709	27.7841476487	4.1755856104	6.6539523413	2.85325099962397E-11	2.51972379058668E-08
Contig25050	ref|XP_011876018.1| PREDICTED: uncharacterized protein LOC105566540 [Vollenhovia emeryi]	0.5843482347	27.9187065357	4.1798383678	6.6793746741	2.39963948332981E-11	2.15962968201307E-08
Contig117625	#N/A	0.3995272955	28.1747911114	4.2006904443	6.7071809944	1.9842009997555E-11	1.80878483008034E-08
Contig41322	ref|XP_012536869.1| PREDICTED: rotatin [Monomorium pharaonis]	0.5683672808	28.244815668	4.1721291653	6.7698804493	1.28888854187222E-11	1.23888492721714E-08
Contig45109	#N/A	0.4508886847	28.2504457834	4.1981368416	6.7292817861	1.70502577373859E-11	1.56438329059702E-08
Contig52004	ref|XP_011870889.1| PREDICTED: cytospin-A isoform X2 [Vollenhovia emeryi]	2.6472058238	28.2561968177	4.1827684286	6.7553815853	1.42459818424394E-11	1.3419429975941E-08
Contig140729	#N/A	0.3516805126	28.3002201864	4.1871807123	6.758776879	1.39161504463874E-11	1.31967134874041E-08
Contig124942	ref|XP_011057794.1| PREDICTED: target of rapamycin complex subunit lst8 [Acromyrmex echinatior]	2.3632517317	28.3016874965	4.1827285854	6.7663217727	1.32097585508597E-11	1.26114814456812E-08
Contig116817	#N/A	0.4692641929	28.3204337692	4.1765827266	6.7807668668	1.19539643830747E-11	1.18116035345126E-08
Contig89224	ref|XP_011692444.1| PREDICTED: facilitated trehalose transporter Tret1-like isoform X1 [Wasmannia auropunctata]	0.9922802935	28.3482924034	4.183941975	6.7754984588	1.23978064380494E-11	0.000000012
Contig134171	#N/A	0.8770741023	28.3761878222	4.1858860314	6.7790158665	1.20997240691497E-11	1.18726021652683E-08
Contig124158	#N/A	0.2716733297	28.4860710089	4.2000019731	6.782394673	1.18200033336373E-11	1.17614859931898E-08
Contig73095	ref|XP_011692574.1| PREDICTED: conserved oligomeric Golgi complex subunit 2 [Wasmannia auropunctata]	3.607115502	28.4917138982	4.1816986684	6.8134306552	9.52983059819881E-12	9.82873338710728E-09
Contig55093	#N/A	0.3109724013	28.5680207906	4.1861766343	6.8243706098	8.83116280656741E-12	9.17512361087908E-09
Contig56674	#N/A	0.2604883872	28.6000889781	4.2020815504	6.8061718067	1.00230007145983E-11	1.01967659890808E-08
Contig143609	ref|XP_011702828.1| PREDICTED: probable E3 ubiquitin-protein ligase HERC3 [Wasmannia auropunctata]	0.5292123242	28.610657094	4.1860344098	6.8347878429	8.21264783842314E-12	8.72498121523064E-09
Contig147312	ref|XP_012530428.1| PREDICTED: THAP domain-containing protein 2-like [Monomorium pharaonis]	4.0902220892	28.6717723746	4.1747176544	6.867954853	6.51288241163143E-12	7.07885189320221E-09
Contig98953	#N/A	0.9770668423	28.7253524694	4.1856115936	6.8628805676	6.74856473313682E-12	7.27025639484033E-09
Contig98351	ref|XP_011689243.1| PREDICTED: aarF domain-containing protein kinase 4 isoform X2 [Wasmannia auropunctata]	1.2616807756	28.7603573643	4.1839540641	6.8739658523	6.24411610731478E-12	6.89277245011919E-09
Contig105359	ref|XP_016772395.1| PREDICTED: ultrabithorax isoform X2 [Apis mellifera]	0.7620732487	28.8083466124	4.1830792394	6.8868756635	5.70310261342248E-12	6.39548642832346E-09
Contig131098	ref|XP_011859445.1| PREDICTED: cytochrome P450 4V2-like [Vollenhovia emeryi]	0.3711630856	28.8623583603	4.1968338788	6.8771743638	6.10513686503123E-12	6.79242144581353E-09
Contig148638	ref|XP_011170315.1| PREDICTED: allatostatin-A receptor-like isoform X1 [Solenopsis invicta]	1.9928493242	28.8904043161	4.1755951871	6.9188709685	4.55257278360677E-12	5.27266292299415E-09
Contig141125	ref|XP_011696169.1| PREDICTED: leukotriene A-4 hydrolase [Wasmannia auropunctata]	3.5625297672	28.966948219	4.1832326635	6.9245367278	4.37404551869271E-12	5.19360932482961E-09
Contig133325	ref|XP_012529462.1| PREDICTED: calcium/calmodulin-dependent 3',5'-cyclic nucleotide phosphodiesterase 1A-like isoform X6 [Monomorium pharaonis]	1.8960870418	28.9869900208	4.182873999	6.9299218737	4.21073097621585E-12	0.000000005
Contig75185	ref|XP_012524161.1| PREDICTED: cilia- and flagella-associated protein 36 [Monomorium pharaonis]	1.5167709487	29.0361614885	4.1712588519	6.9610068613	3.37849316498836E-12	4.30063917777803E-09
Contig46218	#N/A	0.3372838511	29.0656456469	4.199998352	6.9203945362	4.50387515737685E-12	5.25937229844526E-09
Contig141688	ref|XP_011684545.1| PREDICTED: neuropeptides capa receptor-like [Wasmannia auropunctata]	0.3941033009	29.0913936274	4.2020893798	6.9230782589	4.41933459986885E-12	5.20365600798057E-09
Contig124759	ref|XP_011156017.1| PREDICTED: probable basic-leucine zipper transcription factor Q isoform X2 [Solenopsis invicta]	0.3445949902	29.1236502248	4.2000018648	6.9341993557	4.08528214311225E-12	4.93365906816523E-09
Contig112351	ref|XP_012063626.1| PREDICTED: vacuolar protein sorting-associated protein 53 homolog [Atta cephalotes]	4.9401671503	29.1306673489	4.1755488958	6.9764881398	3.0264987581754E-12	0.000000004
Contig73610	ref|XP_014471313.1| PREDICTED: growth arrest-specific protein 2-like [Dinoponera quadriceps]	0.3250243154	29.1598360948	4.2006990269	6.9416627824	3.87511354706214E-12	4.7201889556831E-09
Contig141072	ref|XP_011171820.1| PREDICTED: membrane-bound transcription factor site-1 protease [Solenopsis invicta]	0.4356056647	29.1801377654	4.1798625927	6.9811236897	2.92828352864634E-12	3.90337431836926E-09
Contig51844	#N/A	0.2557475244	29.1835182377	4.2020856247	6.9450079898	3.78438905472441E-12	4.64976365448169E-09
Contig44152	ref|XP_011861946.1| PREDICTED: probable cardiolipin synthase (CMP-forming) [Vollenhovia emeryi]	0.9193227023	29.200226196	4.183960313	6.979087757	2.97102860846309E-12	3.92334046065429E-09
Contig106301	#N/A	1.2997885375	29.3238443046	3.0758077487	9.5337051924	1.51767576157606E-21	2.14443032083413E-16
Contig127647	ref|XP_011059229.1| PREDICTED: inositol-3-phosphate synthase 1-A isoform X1 [Acromyrmex echinatior]	9.1146022665	29.4074343524	4.166946752	7.0573098488	1.69756822618628E-12	2.52485576479413E-09
Contig94778	ref|XP_011882030.1| PREDICTED: aminopeptidase N-like isoform X2 [Vollenhovia emeryi]	1.7515840705	29.437334012	4.1825570866	7.0381188835	1.94852412738652E-12	2.72594666957755E-09
Contig104422	#N/A	0.1842032582	29.5684199511	4.2007012044	7.0389248158	1.93728860170237E-12	2.72594666957755E-09
Contig134524	ref|XP_011862470.1| PREDICTED: protein PTHB1 [Vollenhovia emeryi]	0.5690801195	29.5774597233	4.2020871732	7.0387544342	1.93965858649188E-12	2.72594666957755E-09
Contig29512	#N/A	0.6497979597	29.592001494	4.1926296606	7.0581004977	1.68793971589598E-12	2.52485576479413E-09
Contig56460	ref|XP_011056365.1| PREDICTED: centaurin-gamma-1A isoform X2 [Acromyrmex echinatior]	4.054245586	29.6087950631	3.2004610243	9.251415605	2.21538873027877E-20	7.82569453555497E-16
Contig145704	#N/A	0.2416366956	29.616572542	4.2006975424	7.0503939508	1.78411945127317E-12	2.60290900585966E-09
Contig89534	ref|XP_017032327.1| PREDICTED: orotidine 5'-phosphate decarboxylase-like [Drosophila kikkawai]	0.7636102885	29.6198160571	4.202092052	7.0488260825	1.80433497931059E-12	2.60290900585966E-09
Contig67649	ref|XP_014476457.1| PREDICTED: sodium-dependent nutrient amino acid transporter 1-like [Dinoponera quadriceps]	0.8649808907	29.7019400367	4.2007061109	7.0707017469	1.54152140614863E-12	2.38239872201486E-09
Contig87140	#N/A	0.6914845489	29.7051355066	4.1943614545	7.0821591865	1.41925487154616E-12	2.33181925098672E-09
Contig16182	#N/A	0.8860680821	29.7083208545	4.1991072179	7.0749136216	1.49541879540712E-12	2.37413696106337E-09
Contig66858	ref|XP_011870772.1| PREDICTED: thrombospondin type-1 domain-containing protein 4-like [Vollenhovia emeryi]	0.9853847736	29.7136648674	4.1991062211	7.0761879559	1.48173862259028E-12	2.37413696106337E-09
Contig111718	#N/A	0.576457073	29.7179205879	4.1991060151	7.0772017856	1.47094277376654E-12	2.37413696106337E-09
Contig89748	ref|XP_011878150.1| PREDICTED: uncharacterized protein LOC105567694 [Vollenhovia emeryi]	0.7869880251	29.743326819	4.1776392995	7.1196493251	1.0820200341878E-12	1.86446566793456E-09
Contig123025	ref|XP_011169209.1| PREDICTED: kinesin-like protein Klp10A isoform X3 [Solenopsis invicta]	1.7560398905	29.849073418	4.1658418675	7.1651959838	7.76753506265911E-13	1.53605621276732E-09
Contig95224	ref|XP_011876846.1| PREDICTED: uncharacterized protein LOC105566980 [Vollenhovia emeryi]	4.2371001292	29.8498623619	4.1749821884	7.149698134	8.69689356613272E-13	1.53605621276732E-09
Contig148959	ref|XP_011868733.1| PREDICTED: gamma-aminobutyric acid type B receptor subunit 1 isoform X2 [Vollenhovia emeryi]	1.963121157	29.8587237924	4.1761022226	7.149902517	8.68395473291693E-13	1.53605621276732E-09
Contig123823	ref|XP_011050770.1| PREDICTED: voltage-dependent calcium channel subunit alpha-2/delta-4-like isoform X1 [Acromyrmex echinatior]	0.680792333	29.8978894971	4.1797669392	7.1530039669	8.48991500311095E-13	1.53605621276732E-09
Contig112617	ref|XP_011637173.1| PREDICTED: sialin [Pogonomyrmex barbatus]	1.5253145114	29.898978802	4.1806321381	7.1517841834	8.5657167159688E-13	1.53605621276732E-09
Contig64697	ref|XP_014470929.1| PREDICTED: S-methyl-5'-thioadenosine phosphorylase-like [Dinoponera quadriceps]	1.6492539232	29.92204788	4.1804511489	7.1576121366	8.20944315109686E-13	1.53605621276732E-09
Contig48949	ref|XP_015907334.1| PREDICTED: FK506-binding protein 15-like isoform X6 [Parasteatoda tepidariorum]	1.233555099	29.9431476751	4.1838885244	7.1567747325	8.25972574033597E-13	1.53605621276732E-09
Contig94246	#N/A	0.7838949087	29.9521059544	4.1720744813	7.1791877371	7.01267957097846E-13	1.53605621276732E-09
Contig94020	#N/A	0.8973413762	29.9703906524	4.1903319729	7.1522711915	8.53537295517402E-13	1.53605621276732E-09
Contig16069	ref|XP_011702409.1| PREDICTED: UDP-glucuronosyltransferase 2B1-like isoform X1 [Wasmannia auropunctata]	0.5743281133	29.9977755298	4.1743922905	7.1861419441	6.66477560355825E-13	1.53605621276732E-09
Contig26736	ref|XP_012542863.1| PREDICTED: cytosolic 10-formyltetrahydrofolate dehydrogenase isoform X2 [Monomorium pharaonis]	15.3068912217	3.0089270386	0.9324996453	3.2267326361	0.001252124	0.0370904328
Contig38822	#N/A	18.6294949916	3.0578865362	0.9068097176	3.3721369288	0.0007458736	0.0240231812
Contig44141	ref|XP_012534427.1| PREDICTED: neprilysin-like [Monomorium pharaonis]	102.0105280354	3.0638269552	0.8958204701	3.4201350131	0.0006259006	0.0207211532
Contig79905	ref|XP_011164671.1| PREDICTED: alpha-tocopherol transfer protein-like isoform X1 [Solenopsis invicta]	16.9192912868	3.0872718895	0.8148074213	3.7889589724	0.0001512799	0.0063110112
Contig74829	ref|XP_011169905.1| PREDICTED: spindle assembly checkpoint component MAD1-like [Solenopsis invicta]	82.0542306771	3.099012024	0.6851866429	4.5228727908	6.10059082130867E-06	0.0006356897
Contig108604	ref|XP_012522422.1| PREDICTED: alpha-tocopherol transfer protein-like [Monomorium pharaonis]	36.8589657406	3.1093602979	0.9299880974	3.3434409607	0.000827463	0.0262030565
Contig140167	#N/A	7.3838220384	3.1513037952	0.8984122127	3.5076368629	0.0004521057	0.0158868896
Contig11908	ref|XP_012221293.1| PREDICTED: uncharacterized protein LOC105671585 [Linepithema humile]	2.9012020827	3.1566536569	0.99954916	3.1580774446	0.0015881336	0.0452507593
Contig126537	ref|XP_011861286.1| PREDICTED: endothelin-converting enzyme 2-like [Vollenhovia emeryi]	17.1453570779	3.2041026405	0.7141073387	4.4868641828	7.22791178197805E-06	0.0007182639
Contig28036	ref|XP_011701348.1| PREDICTED: venom acid phosphatase Acph-1-like, partial [Wasmannia auropunctata]	47.5208353728	3.2565266848	1.0399284334	3.131491149	0.0017392103	0.0486431504
Contig35291	ref|XP_011873886.1| PREDICTED: cytochrome P450 9e2-like [Vollenhovia emeryi]	52.3923490291	3.258219113	0.9975244055	3.2663051601	0.0010896076	0.0329745741
Contig75769	ref|XP_011705199.1| PREDICTED: uncharacterized protein LOC105460446 isoform X1 [Wasmannia auropunctata]	10.0373114883	3.2681088512	0.6402875915	5.1041264812	3.32325959796712E-07	6.41513862248663E-05
Contig113963	ref|XP_011161023.1| PREDICTED: branched-chain-amino-acid aminotransferase, cytosolic-like, partial [Solenopsis invicta]	22.4095408668	3.276215237	1.0122282061	3.2366369729	0.0012094717	0.0360309336
Contig142923	ref|XP_011298410.1| PREDICTED: uncharacterized protein LOC105263718 [Fopius arisanus]	5.9893629074	3.2796315461	0.926020546	3.5416401507	0.0003976475	0.0142745766
Contig106752	ref|XP_011703061.1| PREDICTED: GTPase-activating Rap/Ran-GAP domain-like protein 3 isoform X1 [Wasmannia auropunctata]	82.2406626873	3.285878397	0.9202469449	3.5706485256	0.0003560985	0.013038519
Contig10118	ref|XP_011069205.1| PREDICTED: maltase 2-like [Acromyrmex echinatior]	124.2600382675	3.3013484658	1.0444998637	3.1606978426	0.0015739168	0.0449000036
Contig101338	ref|XP_011863706.1| PREDICTED: phenoloxidase 2 [Vollenhovia emeryi]	350.0874837307	3.3119819853	0.9627027221	3.4402956484	0.0005810791	0.0195162177
Contig66106	ref|XP_011702891.1| PREDICTED: probable G-protein coupled receptor No9 isoform X2 [Wasmannia auropunctata]	12.6448951459	3.3294480836	0.8588015533	3.8768538212	0.0001058159	0.0046899208
Contig25124	#N/A	101.0721563395	3.3314776852	0.9809803226	3.3960698378	0.0006836092	0.0223024526
Contig126866	ref|XP_011688014.1| PREDICTED: leucine-rich repeat-containing protein 49 isoform X1 [Wasmannia auropunctata]	54.7078077598	3.3500746309	1.0314955139	3.2477840045	0.0011630753	0.0348781003
Contig10769	ref|XP_011861289.1| PREDICTED: neprilysin-like isoform X2 [Vollenhovia emeryi]	10.5931884646	3.3975154147	1.033464039	3.2875023091	0.0010108036	0.0310371639
Contig49030	#N/A	6.2313552154	3.4316097259	0.8893099619	3.8587330321	0.0001139764	0.0049598144
Contig22415	#N/A	4.4670638472	3.4404760756	1.0774592289	3.1931380633	0.0014073564	0.0409672926
Contig13527	#N/A	83.0278108687	3.4420075364	0.8672349838	3.9689445199	7.21916858815896E-05	0.0034802008
Contig74830	ref|XP_011861287.1| PREDICTED: neprilysin-like [Vollenhovia emeryi]	106.2563241599	3.4596226796	0.8105130684	4.2684354078	1.96848809712334E-05	0.0013489167
Contig10770	ref|XP_011169904.1| PREDICTED: membrane metallo-endopeptidase-like 1 [Solenopsis invicta]	9.8148722168	3.5060755286	0.8531376579	4.1096246265	3.963027911086E-05	0.0022256119
Contig7251	#N/A	2.0740285351	3.553012648	1.0289704984	3.4529781499	0.0005544339	0.0187775283
Contig56274	ref|XP_011873492.1| PREDICTED: galactokinase-like isoform X4 [Vollenhovia emeryi]	2.3775967892	3.5719976285	1.0836092293	3.2963890783	0.0009793628	0.0302273973
Contig146622	ref|XP_011866380.1| PREDICTED: cytochrome P450 6k1-like isoform X1 [Vollenhovia emeryi]	6.1113257386	3.5776049186	0.8799266843	4.0657988701	4.78682059553924E-05	0.0025924239
Contig134899	ref|XP_012062150.1| PREDICTED: uncharacterized protein LOC105625431, partial [Atta cephalotes]	16.8510519425	3.5776469154	0.890648177	4.0169025297	5.89680992327103E-05	0.0029831778
Contig23712	ref|XP_012536535.1| PREDICTED: acyl-CoA synthetase short-chain family member 3, mitochondrial isoform X1 [Monomorium pharaonis]	62.2422829985	3.6072406826	0.7998959144	4.5096375885	6.49384667471294E-06	0.0006629776
Contig20257	#N/A	3.8404129846	3.7089937053	0.9919461139	3.7391080555	0.0001846743	0.0074869795
Contig85018	ref|XP_011863791.1| PREDICTED: G-protein coupled receptor Mth2-like isoform X1 [Vollenhovia emeryi]	2.2635058858	3.7516984806	1.1996195301	3.1274069706	0.0017635562	0.0492655601
Contig22919	ref|XP_008218054.1| PREDICTED: uncharacterized protein LOC103318189 isoform X1 [Nasonia vitripennis]	21.3408344805	3.7558820674	1.1636707613	3.2276157419	0.0012482653	0.0370077115
Contig23547	#N/A	2.2925478411	3.76417762	1.1900895995	3.1629363213	0.0015618649	0.044601218
Contig8504	ref|XP_011684665.1| PREDICTED: uncharacterized protein LOC105448005 [Wasmannia auropunctata]	7.3095456107	3.8295597869	1.1675264387	3.2800625837	0.0010378406	0.03172734
Contig149950	ref|XP_011704666.1| PREDICTED: dual oxidase 2-like [Wasmannia auropunctata]	4.3005241866	3.8405193497	1.1721882191	3.2763674698	0.0010515165	0.0320483449
Contig34595	ref|XP_011861285.1| PREDICTED: neprilysin-11-like [Vollenhovia emeryi]	23.5488309136	3.8727191815	0.8154801068	4.7490050942	2.04419794059197E-06	0.000276401
Contig30637	ref|XP_011863792.1| PREDICTED: G-protein coupled receptor Mth2-like isoform X2 [Vollenhovia emeryi]	3.0343950754	3.9070342323	1.0965705457	3.5629574837	0.0003667001	0.0133505855
Contig48320	ref|XP_011643309.1| PREDICTED: uncharacterized protein LOC105431070, partial [Pogonomyrmex barbatus]	18.7625031898	4.0415454775	1.2411535941	3.2562814923	0.0011288178	0.0340154759
Contig76074	ref|XP_011863706.1| PREDICTED: phenoloxidase 2 [Vollenhovia emeryi]	8.1999413639	4.1072850684	1.2417691832	3.3076075038	0.0009409659	0.0291825409
Contig144522	ref|XP_011864998.1| PREDICTED: SET and MYND domain-containing protein 4-like [Vollenhovia emeryi]	15.6949671884	4.1288757204	1.2313192026	3.3532131324	0.0007987917	0.0254663517
Contig138920	ref|XP_011693826.1| PREDICTED: guanine deaminase-like [Wasmannia auropunctata]	5.9291312332	4.1545570171	1.1945611586	3.4778939422	0.0005053698	0.0173867159
Contig30041	#N/A	7.7386421271	4.1565151674	1.184261072	3.5097963328	0.00044845	0.0157859109
Contig38105	ref|XP_012532495.1| PREDICTED: uncharacterized protein LOC105834503 [Monomorium pharaonis]	6.9134749923	4.1992992673	1.2532444406	3.350742386	0.0008059524	0.0256699056
Contig30530	ref|XP_011163204.1| PREDICTED: sodium/potassium/calcium exchanger Nckx30C isoform X1 [Solenopsis invicta]	2.6951812283	4.2197951668	1.0192043164	4.1402838459	3.46876333836933E-05	0.0020255013
Contig140211	#N/A	26.0419207816	4.319400647	1.21613929	3.5517318474	0.0003827047	0.0138193256
Contig68304	ref|XP_011162937.1| PREDICTED: galactokinase-like [Solenopsis invicta]	19.0836165018	4.3320737271	1.3734831581	3.1540785205	0.0016100576	0.0457370945
Contig71314	ref|XP_011161519.1| PREDICTED: prostatic acid phosphatase-like [Solenopsis invicta]	195.8907520934	4.3480661142	1.1501913106	3.7802981767	0.0001566407	0.006492477
Contig124133	#N/A	19.6961143977	4.4574511028	1.4061876969	3.1698834464	0.001525001	0.0437785576
Contig74261	#N/A	15.1875083957	4.4609010971	1.2750189514	3.4986939544	0.0004675429	0.0163561301
Contig37090	#N/A	2.4748941522	4.4780932719	1.1814758022	3.790253904	0.0001504934	0.0062837653
Contig115774	#N/A	12.7804692464	4.5742052383	1.2059368739	3.7930718742	0.0001487951	0.0062410898
Contig92863	ref|XP_011702244.1| PREDICTED: uncharacterized oxidoreductase dhs-27-like isoform X3 [Wasmannia auropunctata]	10.1744333767	4.5936634137	1.3725740187	3.3467509592	0.0008176463	0.0259328779
Contig135066	ref|XP_012526891.1| PREDICTED: E3 ubiquitin-protein ligase listerin [Monomorium pharaonis]	10.5702152244	4.6218200344	1.2669269611	3.6480556308	0.0002642324	0.0101206967
Contig18755	ref|XP_012541811.1| PREDICTED: uncharacterized protein LOC105839802 [Monomorium pharaonis]	3.3067026268	4.6701305549	1.4591510207	3.2005806724	0.0013715097	0.0400889958
Contig19849	ref|XP_011862688.1| PREDICTED: uncharacterized protein LOC105559191 isoform X2 [Vollenhovia emeryi]	11.1868757611	4.6858268895	1.3573825811	3.4521047748	0.0005562317	0.0188339011
Contig35415	ref|XP_011707251.1| PREDICTED: cytochrome P450 4C1-like [Wasmannia auropunctata]	214.726655355	4.7399039731	1.1765474634	4.0286551292	5.60968391270903E-05	0.0028780596
Contig33276	ref|XP_011872986.1| PREDICTED: deoxyribose-phosphate aldolase [Vollenhovia emeryi]	30.0926046411	4.7987041499	1.2776632908	3.7558441135	0.0001727582	0.0070488641
Contig19808	#N/A	3418.9766893927	4.935511649	1.1012293076	4.4818201033	7.40091192364304E-06	0.0007256951
Contig754	#N/A	199.47897107	4.9899790222	1.1330722008	4.4039373824	1.06303638429181E-05	0.0009147616
Contig127082	ref|XP_011707251.1| PREDICTED: cytochrome P450 4C1-like [Wasmannia auropunctata]	60.4285903641	5.0028357639	1.2488645595	4.0059073867	6.17798538431535E-05	0.0030878345
Contig18950	ref|XP_011707251.1| PREDICTED: cytochrome P450 4C1-like [Wasmannia auropunctata]	338.7836406817	5.0149393434	1.1252241955	4.4568356809	8.31783105888928E-06	0.000783001
Contig116379	ref|XP_011864320.1| PREDICTED: 7SK snRNA methylphosphate capping enzyme-like [Vollenhovia emeryi]	26.0142475528	5.084212874	1.234533974	4.118325604	3.8163522003527E-05	0.002165515
Contig40620	ref|XP_011707625.1| PREDICTED: protein YIPF1 [Wasmannia auropunctata]	9.7308491569	5.092671796	1.6231968658	3.1374332365	0.0017043408	0.0478610205
Contig74262	#N/A	13.2742457015	5.1270305779	1.3823412039	3.708947229	0.0002081228	0.0082836976
Contig9574	ref|XP_012219565.1| PREDICTED: RNA-binding protein Musashi homolog Rbp6 isoform X2 [Linepithema humile]	5.4321688344	5.1805149993	1.4305283498	3.6213997437	0.0002930134	0.0110493483
Contig99683	ref|XP_011706785.1| PREDICTED: transmembrane protein 245 isoform X2 [Wasmannia auropunctata]	18.9669021702	5.2259016339	1.4435543359	3.6201627497	0.0002944178	0.0110904686
Contig139968	ref|XP_011865042.1| PREDICTED: WD repeat-containing protein 3 [Vollenhovia emeryi]	21.0264341215	5.2513789769	1.3723285648	3.8266193036	0.0001299152	0.005554199
Contig27841	ref|XP_011685312.1| PREDICTED: clavesin-1 [Wasmannia auropunctata]	8.7439773438	5.2539392344	1.6598668064	3.1652776079	0.0015493505	0.0442796479
Contig56684	ref|XP_011696900.1| PREDICTED: ubiquitin carboxyl-terminal hydrolase 47 [Wasmannia auropunctata]	26.880103112	5.3109000105	1.6873165554	3.147542169	0.0016464936	0.0465848216
Contig11935	ref|XP_011874257.1| PREDICTED: uncharacterized protein LOC105565563 [Vollenhovia emeryi]	8.0775651987	5.3419127273	1.1538353691	4.62970097	3.6619416796851E-06	0.0004388646
Contig148016	ref|XP_012060711.1| PREDICTED: focadhesin [Atta cephalotes]	8.9950597465	5.3423666315	1.252451752	4.265526894	1.99430987762182E-05	0.0013586789
Contig65837	ref|XP_011861288.1| PREDICTED: neprilysin-like isoform X1 [Vollenhovia emeryi]	4.8916306923	5.3820786765	1.1691559585	4.6033881428	4.15672494885716E-06	0.0004799481
Contig133297	#N/A	7.3422779046	5.4455114627	1.376528576	3.9559741496	7.62234036392628E-05	0.0036434839
Contig35408	ref|XP_011699665.1| PREDICTED: cytochrome P450 4d2-like [Wasmannia auropunctata]	11.2428697066	5.4762576527	1.587264323	3.4501233181	0.0005603305	0.0189280801
Contig94817	ref|XP_011160878.1| PREDICTED: uncharacterized protein LOC105196565 [Solenopsis invicta]	19.1351014978	5.5372591511	1.5325319693	3.6131443011	0.0003025062	0.0113437431
Contig38413	ref|XP_011689743.1| PREDICTED: uncharacterized protein LOC105451163 [Wasmannia auropunctata]	11.713121329	5.5581699104	1.623143654	3.4243240865	0.0006163307	0.0204626095
Contig105296	ref|XP_011875630.1| PREDICTED: ATP-binding cassette sub-family D member 1 [Vollenhovia emeryi]	4.5684678647	5.6018709952	1.7422093857	3.215383318	0.0013027044	0.0384115665
Contig71963	#N/A	7.226390739	5.6056860652	1.7229359108	3.2535662123	0.0011396616	0.0343047172
Contig91637	ref|XP_015438077.1| PREDICTED: RNA-directed DNA polymerase from mobile element jockey-like [Dufourea novaeangliae]	10.902188418	5.622284942	1.5016209521	3.7441439095	0.0001810099	0.0073536959
Contig1534	#N/A	3.5007804702	5.6263501286	1.6617584449	3.3857809755	0.0007097601	0.0230068754
Contig102815	ref|XP_011696470.1| PREDICTED: ribonucleases P/MRP protein subunit POP1 [Wasmannia auropunctata]	18.4047353937	5.6953526556	1.6004522325	3.5585895911	0.0003728516	0.0135283163
Contig130463	ref|XP_012235691.1| PREDICTED: uncharacterized protein LOC105679930 [Linepithema humile]	51.4690329762	5.8558751411	1.311122204	4.4663076585	7.95811438426746E-06	0.0007582318
Contig83289	ref|XP_014476583.1| PREDICTED: focal adhesion kinase 1 isoform X4 [Dinoponera quadriceps]	19.3897354994	5.8993953402	1.6581889335	3.5577341165	0.0003740677	0.0135559473
Contig52963	ref|XP_011882286.1| PREDICTED: lysosomal alpha-glucosidase-like [Vollenhovia emeryi]	113.2065616097	5.9555188765	1.736625052	3.4293636786	0.0006049983	0.0201471695
Contig143789	ref|XP_011875586.1| PREDICTED: MRG/MORF4L-binding protein [Vollenhovia emeryi]	39.5243422453	6.0966935686	1.4586919903	4.17956197	2.92071123984332E-05	0.0017895246
Contig123039	ref|XP_011880646.1| PREDICTED: CAS1 domain-containing protein 1 [Vollenhovia emeryi]	20.5907556051	6.2012585693	1.6664042195	3.7213411348	0.0001981675	0.0079456515
Contig118203	ref|XP_011161382.1| PREDICTED: uncharacterized protein LOC105196926 [Solenopsis invicta]	10.310323766	6.541012263	2.0827928302	3.1405006624	0.0016865933	0.04746277
Contig145148	ref|XP_011872652.1| PREDICTED: homeotic protein female sterile isoform X4 [Vollenhovia emeryi]	25.1442825838	6.5941651072	1.9251390653	3.4252928664	0.000614137	0.0204082123
Contig134275	ref|XP_011631462.1| PREDICTED: uncharacterized protein LOC105423416 isoform X2 [Pogonomyrmex barbatus]	30.4233622334	6.6084526327	1.3292113546	4.9717094348	6.63651192754849E-07	0.0001116332
Contig94859	ref|XP_011862052.1| PREDICTED: secretin receptor isoform X2 [Vollenhovia emeryi]	17.8698039876	6.999070874	1.6160199189	4.3310548293	1.48396720453928E-05	0.0011169332
Contig57137	ref|XP_011884018.1| PREDICTED: F-box/LRR-repeat protein 4-like [Vollenhovia emeryi]	13.3648841957	6.9993345816	1.9675280365	3.5574255878	0.0003745071	0.0135683937
Contig39731	ref|XP_011066051.1| PREDICTED: mediator of RNA polymerase II transcription subunit 16 isoform X2 [Acromyrmex echinatior]	5.2821416396	7.2100394137	2.1235770284	3.3952332867	0.0006857015	0.0223603877
Contig73765	ref|XP_011060105.1| PREDICTED: vascular endothelial growth factor receptor 1 isoform X1 [Acromyrmex echinatior]	51.2040900611	7.5042197145	2.1868912621	3.4314553469	0.000600352	0.0200254793
Contig126731	ref|XP_011696939.1| PREDICTED: uncharacterized protein LOC105455363 [Wasmannia auropunctata]	6.0578008852	7.7786407929	2.0451719064	3.8034166071	0.0001427141	0.0060347326
Contig3687	ref|XP_011881997.1| PREDICTED: thyrotropin-releasing hormone-degrading ectoenzyme-like [Vollenhovia emeryi]	5.3120110656	7.8136387441	2.402548022	3.252229996	0.0011450333	0.0344215941
Contig105516	ref|XP_011166394.1| PREDICTED: prostaglandin E synthase 2-like [Solenopsis invicta]	4.7254016563	8.2743046052	2.2576448886	3.6650159851	0.0002473231	0.0095742512
Contig137714	ref|XP_011162552.1| PREDICTED: segment polarity protein dishevelled homolog DVL-3 isoform X3 [Solenopsis invicta]	65.4900731834	8.2777206392	1.7691609051	4.678896428	2.88423080709743E-06	0.0003663709
Contig119217	ref|XP_011872888.1| PREDICTED: protein NETWORKED 1D-like isoform X4 [Vollenhovia emeryi]	58.0106066379	8.8376309269	2.6873154365	3.2886466572	0.0010067032	0.0309226399
Contig94948	ref|XP_012529440.1| PREDICTED: dual oxidase 2-like isoform X1 [Monomorium pharaonis]	7.1288311056	8.8706653752	2.5114450073	3.5320962033	0.0004122793	0.0147142798
Contig141119	ref|XP_011696169.1| PREDICTED: leukotriene A-4 hydrolase [Wasmannia auropunctata]	13.574445442	8.9063606234	2.2262295712	4.000647884	6.31692952585071E-05	0.0031343154
Contig67843	ref|XP_011858874.1| PREDICTED: cytochrome P450 4c3-like, partial [Vollenhovia emeryi]	6.5859068778	9.0705600335	2.1998121168	4.1233339722	3.73427650949609E-05	0.0021347182
Contig4606	ref|XP_011865557.1| PREDICTED: MAGUK p55 subfamily member 7 isoform X2 [Vollenhovia emeryi]	8.4012288088	9.6811743466	2.5660749816	3.7727558299	0.0001614543	0.0066704693
Contig126917	ref|XP_012064166.1| PREDICTED: uncharacterized protein LOC105627497 [Atta cephalotes]	4.6900877309	9.6882457041	3.0370623682	3.190005515	0.0014227008	0.0413458151
Contig87791	ref|XP_011861263.1| PREDICTED: hamartin isoform X2 [Vollenhovia emeryi]	30.4260880458	9.7395094755	2.7294224962	3.5683407347	0.0003592491	0.0131334601

## Sheet: b)
Cont	Annotation	baseMean	log2FoldChange	lfcSE	stat	pvalue	padj
Contig132790	ref|XP_011860168.1| PREDICTED: uncharacterized protein LOC105557521 [Vollenhovia emeryi]	0.3277459829	-30	4.1888784653	-7.1618215349	7.96120239197724E-13	1.53605621276732E-09
Contig133952	ref|XP_011631189.1| PREDICTED: circadian clock-controlled protein [Pogonomyrmex barbatus]	10.9813042646	-30	4.1829822202	-7.1719166903	7.39549446555443E-13	1.53605621276732E-09
Contig138521	ref|XP_011700200.1| PREDICTED: hexosaminidase D-like isoform X1 [Wasmannia auropunctata]	0.6538526245	-30	4.1841493124	-7.1699162147	7.50436798078438E-13	1.53605621276732E-09
Contig51094	#N/A	0.4427937098	-30	4.1850277097	-7.168411318	7.58730565031122E-13	1.53605621276732E-09
Contig53137	ref|XP_014488017.1| PREDICTED: uncharacterized protein LOC106751597 [Dinoponera quadriceps]	0.8664768834	-30	4.175735796	-7.1843625807	6.75214562023391E-13	1.53605621276732E-09
Contig54574	ref|XP_011877461.1| PREDICTED: chromosome transmission fidelity protein 18 homolog [Vollenhovia emeryi]	4.070545277	-30	4.1747034651	-7.1861391476	6.66491204192855E-13	1.53605621276732E-09
Contig62800	#N/A	1.0199130392	-30	4.1792210221	-7.1783712423	7.05467849851617E-13	1.53605621276732E-09
Contig63656	#N/A	0.5198212222	-30	4.1757358212	-7.1843625374	6.75214775993729E-13	1.53605621276732E-09
Contig70599	#N/A	0.9110995151	-30	4.1708545418	-7.1927706179	6.3489558678227E-13	1.53605621276732E-09
Contig72976	ref|XP_011053265.1| PREDICTED: adenylate cyclase type 8 [Acromyrmex echinatior]	0.4335178537	-30	4.1863184373	-7.1662011501	7.71074552982285E-13	1.53605621276732E-09
Contig79244	#N/A	0.2227666957	-30	4.1882208751	-7.1629460085	7.89614551392829E-13	1.53605621276732E-09
Contig82034	#N/A	0.280508325	-30	4.1859835489	-7.1667744628	7.67853743543818E-13	1.53605621276732E-09
Contig87453	ref|XP_015593893.1| PREDICTED: uncharacterized protein LOC107267125 [Cephus cinctus]	3.1307297834	-30	4.1771190961	-7.181983398	6.87072667138557E-13	1.53605621276732E-09
Contig87687	#N/A	0.7256897319	-30	4.1688948458	-7.1961517643	6.19356899729463E-13	1.53605621276732E-09
Contig87907	ref|XP_011162819.1| PREDICTED: citron Rho-interacting kinase-like [Solenopsis invicta]	0.5867422483	-30	4.171606659	-7.1914738019	6.40956341681067E-13	1.53605621276732E-09
Contig94105	#N/A	0.641619172	-30	4.1707508407	-7.1929494583	6.3406419103337E-13	1.53605621276732E-09
Contig76159	#N/A	2.1700822774	30	4.183454933	7.1711062938	7.43941122686958E-13	1.53605621276732E-09
Contig21588	ref|XP_012054688.1| PREDICTED: catenin alpha [Atta cephalotes]	611.821944836	-0.3899298955	0.1237329776	-3.1513821374	0.0016249973	0.0461058728
Contig46987	ref|XP_012526296.1| PREDICTED: DNA-directed RNA polymerase II subunit RPB3 [Monomorium pharaonis]	183.2328114842	-0.4337809821	0.136764182	-3.1717440614	0.0015152648	0.0435350837
Contig24336	ref|XP_011862999.1| PREDICTED: UHRF1-binding protein 1-like isoform X2 [Vollenhovia emeryi]	216.907228677	-0.4683615708	0.1347848049	-3.4748840653	0.0005110742	0.0175445209
Contig27259	#N/A	156.3335068678	-0.4924875872	0.15019825	-3.2789169463	0.001042063	0.0318219959
Contig42254	ref|XP_011871340.1| PREDICTED: 60S ribosomal protein L21 [Vollenhovia emeryi]	362.5146003593	-0.4954732667	0.1547634054	-3.2014885263	0.0013671952	0.0399877003
Contig20355	ref|XP_012538467.1| PREDICTED: probable low-specificity L-threonine aldolase 2 isoform X2 [Monomorium pharaonis]	1005.0537552836	-0.5071003888	0.1466329586	-3.4582974641	0.0005436008	0.0184859605
Contig94567	ref|XP_011638362.1| PREDICTED: RNA-binding protein 5-like [Pogonomyrmex barbatus]	382.5093847518	-0.5164851334	0.1641834059	-3.1457815756	0.0016564366	0.0467631418
Contig91894	ref|XP_012286198.1| PREDICTED: pre-mRNA-splicing factor RBM22 [Orussus abietinus]	107.4402230862	-0.5185192854	0.1582677349	-3.2762159999	0.0010520806	0.0320586238
Contig73802	ref|XP_012063616.1| PREDICTED: probable ATP-dependent RNA helicase DDX5 [Atta cephalotes]	480.3990417595	-0.530647139	0.1488693647	-3.5645153733	0.0003645291	0.0132891972
Contig125413	ref|XP_011159178.1| PREDICTED: xaa-Pro aminopeptidase 1 [Solenopsis invicta]	569.3621334854	-0.5513477634	0.1571956487	-3.5073983779	0.0004525112	0.015893231
Contig13038	ref|XP_011706840.1| PREDICTED: transmembrane emp24 domain-containing protein eca-like [Wasmannia auropunctata]	371.6553989964	-0.5612468054	0.1753668764	-3.2004151343	0.0013722978	0.0400954417
Contig24768	ref|XP_011059918.1| PREDICTED: solute carrier family 12 member 9 [Acromyrmex echinatior]	968.8091738442	-0.605120486	0.1765907089	-3.4266835997	0.0006110006	0.0203223647
Contig1046	ref|XP_011692505.1| PREDICTED: uncharacterized protein LOC105452787 [Wasmannia auropunctata]	161.856446616	-0.6136657258	0.1695770249	-3.6188022879	0.0002959696	0.0111340848
Contig52896	#N/A	176.6173937966	-0.6424024152	0.202118411	-3.1783468508	0.0014811744	0.0427820783
Contig13041	ref|XP_011866274.1| PREDICTED: transmembrane and ubiquitin-like domain-containing protein 2 [Vollenhovia emeryi]	634.4642428857	-0.6506765859	0.1886173683	-3.449717233	0.000561174	0.0189467637
Contig79533	ref|XP_011690970.1| PREDICTED: E3 ubiquitin-protein ligase UBR5 isoform X6 [Wasmannia auropunctata]	922.2673405424	-0.6563197595	0.194242956	-3.3788600269	0.0007278706	0.0234861677
Contig25941	ref|XP_012061257.1| PREDICTED: transmembrane emp24 domain-containing protein eca [Atta cephalotes]	241.5268879793	-0.658183608	0.1663201133	-3.9573302051	7.5792125938542E-05	0.0036265493
Contig130367	ref|XP_011158849.1| PREDICTED: uncharacterized protein LOC105195218 isoform X2 [Solenopsis invicta]	137.902403102	-0.6644845979	0.183495902	-3.6212503419	0.0002931826	0.0110527823
Contig132053	ref|XP_011051761.1| PREDICTED: elongation factor 1-alpha [Acromyrmex echinatior]	2279.9493979861	-0.6703282189	0.1694345011	-3.9562675513	7.61298943789642E-05	0.0036402456
Contig115842	ref|XP_011057899.1| PREDICTED: eukaryotic translation initiation factor 2 subunit 2 isoform X3 [Acromyrmex echinatior]	991.7634483539	-0.6855831295	0.2179310266	-3.1458720688	0.0016559242	0.0467580181
Contig58943	ref|XP_011877239.1| PREDICTED: kinase D-interacting substrate of 220 kDa isoform X3 [Vollenhovia emeryi]	1403.5300529276	-0.7044004506	0.16120401	-4.3696211426	1.24462279330726E-05	0.0010066484
Contig25912	ref|XP_011860433.1| PREDICTED: chitinase-3-like protein 2 [Vollenhovia emeryi]	386.7880932729	-0.7152076415	0.2007944677	-3.5618891784	0.0003681958	0.0134015876
Contig12526	ref|XP_012542554.1| PREDICTED: 26S proteasome non-ATPase regulatory subunit 11 [Monomorium pharaonis]	724.9513353052	-0.7262289587	0.2292244816	-3.168199808	0.0015338606	0.0439762738
Contig57387	#N/A	167.2192653754	-0.729250883	0.2193757711	-3.3242088641	0.0008866976	0.0277681593
Contig13777	ref|XP_011690662.1| PREDICTED: serine/threonine-protein kinase N isoform X4 [Wasmannia auropunctata]	814.8611881334	-0.7342938912	0.2137726283	-3.4349294245	0.0005927082	0.0198313725
Contig2345	ref|XP_011687530.1| PREDICTED: cytoplasmic tRNA 2-thiolation protein 1 [Wasmannia auropunctata]	1009.3299838999	-0.7349968968	0.2312332259	-3.1785955242	0.0014799045	0.0427619753
Contig98235	ref|XP_011158971.1| PREDICTED: lysosomal aspartic protease, partial [Solenopsis invicta]	266.8287456471	-0.7365144407	0.232492835	-3.1679016725	0.0015354344	0.0440043849
Contig4015	ref|XP_011871232.1| PREDICTED: uncharacterized protein LOC105563879 [Vollenhovia emeryi]	299.3278930468	-0.7378439246	0.2347421328	-3.1432104495	0.0016710565	0.0471287966
Contig122319	ref|XP_011870313.1| PREDICTED: LOW QUALITY PROTEIN: uncharacterized protein LOC105563373 [Vollenhovia emeryi]	109.5274580691	-0.7423902161	0.1778636896	-4.173927899	2.99392541258542E-05	0.0018210619
Contig59063	ref|XP_011874491.1| PREDICTED: aspartate--tRNA ligase, cytoplasmic [Vollenhovia emeryi]	304.8134805466	-0.7434256659	0.2008739928	-3.7009552888	0.0002147893	0.0085059101
Contig13590	ref|XP_011882348.1| PREDICTED: speckle-type POZ protein isoform X2 [Vollenhovia emeryi]	189.9786712845	-0.7443858635	0.2359722001	-3.1545489815	0.0016074639	0.0457185649
Contig99589	ref|XP_011869298.1| PREDICTED: adrenodoxin-like [Vollenhovia emeryi]	174.1064978268	-0.7445607229	0.2136978712	-3.4841747303	0.0004936571	0.0170293619
Contig124217	ref|XP_011160814.1| PREDICTED: pre-mRNA-splicing factor Syf2 [Solenopsis invicta]	485.2337353197	-0.7495281834	0.198878117	-3.7687815765	0.0001640464	0.0067578013
Contig140701	ref|XP_011685513.1| PREDICTED: protein SYS1 homolog [Wasmannia auropunctata]	296.4988826679	-0.7503359624	0.2248672332	-3.3367954577	0.0008475029	0.026777644
Contig27202	ref|XP_011864586.1| PREDICTED: polyadenylate-binding protein 4-like [Vollenhovia emeryi]	993.0934820857	-0.7523535789	0.2250647875	-3.342831135	0.0008292835	0.026243061
Contig1693	#N/A	32.3865193806	-0.7562606854	0.2391141451	-3.162760133	0.0015628104	0.0446192004
Contig58331	ref|XP_011873737.1| PREDICTED: histone-lysine N-methyltransferase SETMAR-like [Vollenhovia emeryi]	66.3078136327	-0.7615939954	0.2245642447	-3.3914303517	0.0006952883	0.0226103922
Contig34857	ref|XP_011875659.1| PREDICTED: protein argonaute-2-like [Vollenhovia emeryi]	238.5813456553	-0.762747401	0.2407540116	-3.168160713	0.0015340669	0.0439762738
Contig47571	ref|XP_012057661.1| PREDICTED: LOW QUALITY PROTEIN: transcription factor MafG [Atta cephalotes]	203.6400771538	-0.773010842	0.2252491792	-3.4318031476	0.0005995826	0.0200122439
Contig82968	ref|XP_012063470.1| PREDICTED: uncharacterized protein LOC105626785 [Atta cephalotes]	286.6988634705	-0.777114437	0.2438702693	-3.1865894889	0.0014396094	0.0417684796
Contig56445	ref|XP_011056359.1| PREDICTED: protein argonaute-2-like [Acromyrmex echinatior]	354.5191771939	-0.789542698	0.2281580861	-3.4605071927	0.0005391588	0.0183525717
Contig77351	ref|XP_011707265.1| PREDICTED: CSC1-like protein 2 isoform X1 [Wasmannia auropunctata]	345.6299635453	-0.7896541326	0.1858743589	-4.248322025	2.15377652098209E-05	0.0014341885
Contig123935	#N/A	3363.0441884512	-0.7901146066	0.2351145634	-3.3605515327	0.0007778702	0.0248779363
Contig21077	ref|XP_012523080.1| PREDICTED: coatomer subunit gamma [Monomorium pharaonis]	337.2378135568	-0.7939439638	0.2505135767	-3.1692652116	0.0015282488	0.0438450689
Contig99513	ref|XP_011635770.1| PREDICTED: pro-neuregulin-2, membrane-bound isoform-like [Pogonomyrmex barbatus]	53.4251030581	-0.7945405233	0.2010527267	-3.9519012574	7.75327338720344E-05	0.003696067
Contig97087	ref|XP_011866274.1| PREDICTED: transmembrane and ubiquitin-like domain-containing protein 2 [Vollenhovia emeryi]	93.8415104895	-0.7966986173	0.1877920536	-4.2424511698	2.21091656639261E-05	0.001459112
Contig68208	ref|XP_011170161.1| PREDICTED: E3 ubiquitin-protein ligase synoviolin B [Solenopsis invicta]	476.1989303628	-0.8062246906	0.243319372	-3.3134422636	0.0009215513	0.028668524
Contig50356	ref|XP_011163080.1| PREDICTED: probable signal peptidase complex subunit 2 [Solenopsis invicta]	267.2350465652	-0.809097357	0.2430149126	-3.3294144319	0.000870288	0.0273507752
Contig3153	ref|XP_016914557.1| PREDICTED: actin-5C [Apis cerana]	1518.2264280854	-0.8095672184	0.252353321	-3.2080703962	0.0013362879	0.0392217418
Contig12505	#N/A	510.9715805841	-0.8152497707	0.2123704596	-3.8388096548	0.0001236322	0.005303237
Contig11526	ref|XP_011875495.1| PREDICTED: bone morphogenetic protein receptor type-2 isoform X1 [Vollenhovia emeryi]	1336.4567075036	-0.8192254744	0.2344865935	-3.4936985613	0.0004763786	0.0165627126
Contig822	#N/A	187.9401464932	-0.820362271	0.2548512831	-3.218984268	0.0012864554	0.03798794
Contig30198	ref|XP_012063849.1| PREDICTED: polyadenylate-binding protein 4-like [Atta cephalotes]	941.6782637081	-0.8220479467	0.2136517959	-3.8476060704	0.0001192776	0.0051587306
Contig50102	#N/A	265.3150803691	-0.8240559297	0.2473557481	-3.3314606025	0.0008639153	0.0271807252
Contig85657	ref|XP_011057892.1| PREDICTED: eukaryotic translation initiation factor 2 subunit 2 isoform X2 [Acromyrmex echinatior]	82.9727087329	-0.8253498261	0.2248472613	-3.6707132709	0.0002418746	0.00938641
Contig45452	ref|XP_012063439.1| PREDICTED: ribosome biogenesis regulatory protein homolog [Atta cephalotes]	53.406238029	-0.8257145916	0.2551958181	-3.2356117653	0.0012138236	0.0361301088
Contig29303	ref|XP_011051558.1| PREDICTED: transcription factor Dp-1 [Acromyrmex echinatior]	129.9929090544	-0.8339627124	0.2602770602	-3.2041345158	0.0013546917	0.0396712682
Contig1169	ref|XP_011066774.1| PREDICTED: glomulin [Acromyrmex echinatior]	111.9494859304	-0.8401903513	0.2462699341	-3.411664336	0.0006456757	0.0212711674
Contig24535	ref|XP_011052344.1| PREDICTED: transmembrane emp24 domain-containing protein bai isoform X2 [Acromyrmex echinatior]	662.5593945608	-0.8407106884	0.2307081217	-3.6440446137	0.0002683869	0.0102548024
Contig73250	#N/A	89.5200439164	-0.8407740274	0.2299317687	-3.6566240163	0.0002555588	0.009833794
Contig127284	#N/A	835.291264055	-0.8433802577	0.2623548841	-3.214654305	0.001306017	0.0384771235
Contig897	#N/A	54.4178428386	-0.8448832599	0.2451419863	-3.446505727	0.0005678865	0.0191596616
Contig12567	ref|XP_011882796.1| PREDICTED: E3 ubiquitin-protein ligase synoviolin A [Vollenhovia emeryi]	639.7374259186	-0.8547751005	0.2427987836	-3.5205081664	0.0004307207	0.0152491974
Contig14438	ref|XP_011705412.1| PREDICTED: aspartate--tRNA ligase, cytoplasmic [Wasmannia auropunctata]	646.7510213356	-0.8606553199	0.2468305551	-3.486826498	0.0004887883	0.0169109518
Contig12707	ref|XP_011692558.1| PREDICTED: uncharacterized protein LOC105452799 isoform X2 [Wasmannia auropunctata]	186.3360702163	-0.865223984	0.2251929542	-3.8421450047	0.0001219637	0.0052478473
Contig6219	ref|XP_011875659.1| PREDICTED: protein argonaute-2-like [Vollenhovia emeryi]	1925.8324028523	-0.8653704494	0.273381699	-3.165429334	0.0015485427	0.0442655149
Contig97086	ref|XP_012221250.1| PREDICTED: transmembrane and ubiquitin-like domain-containing protein 1 [Linepithema humile]	90.3256614806	-0.866122743	0.1886313395	-4.5916163523	4.39826324913162E-06	0.0004999715
Contig60244	ref|XP_011881342.1| PREDICTED: hydroxysteroid dehydrogenase-like protein 2 [Vollenhovia emeryi]	281.4471216318	-0.869650389	0.2623080926	-3.3153776549	0.0009151939	0.0285084117
Contig21456	ref|XP_012064513.1| PREDICTED: serine/threonine-protein phosphatase 2A catalytic subunit beta isoform [Atta cephalotes]	140.2336864153	-0.8697891912	0.2521118273	-3.450013435	0.0005605587	0.0189305106
Contig74343	ref|XP_011061130.1| PREDICTED: mannosyl-oligosaccharide 1,2-alpha-mannosidase IA isoform X2 [Acromyrmex echinatior]	456.4362657549	-0.8703839378	0.2460395862	-3.5375768234	0.0004038167	0.0144560646
Contig14480	ref|XP_011707118.1| PREDICTED: signal peptidase complex catalytic subunit SEC11A [Wasmannia auropunctata]	444.2236559252	-0.87191229	0.2602393864	-3.3504240155	0.0008068794	0.0256894194
Contig116619	ref|XP_012530822.1| PREDICTED: probable signal peptidase complex subunit 2 [Monomorium pharaonis]	198.7491805613	-0.8754259578	0.2567402192	-3.4097733523	0.0006501689	0.0214092076
Contig17410	ref|XP_012543609.1| PREDICTED: cytochrome P450 9e2-like [Monomorium pharaonis]	74.5644186931	-0.8758532097	0.2581791211	-3.3924246311	0.0006927699	0.0225472625
Contig10080	#N/A	186.9749251296	-0.8767509245	0.2723491081	-3.2192171683	0.001285411	0.03798091
Contig39361	ref|XP_011879423.1| PREDICTED: GTP-binding protein 2 [Vollenhovia emeryi]	225.5064625282	-0.8786602396	0.2362138726	-3.7197656083	0.0001994077	0.0079898651
Contig69099	ref|XP_011860618.1| PREDICTED: myosin heavy chain 95F [Vollenhovia emeryi]	376.5019581998	-0.8789309588	0.2665411531	-3.2975431698	0.0009753468	0.0301166033
Contig139841	ref|XP_011688503.1| PREDICTED: nucleosome assembly protein 1-like 1 isoform X3 [Wasmannia auropunctata]	66.895246633	-0.8809311834	0.2237089897	-3.9378443599	8.22168923390293E-05	0.003844143
Contig44611	ref|XP_011632519.1| PREDICTED: lysine--tRNA ligase isoform X2 [Pogonomyrmex barbatus]	301.0253831152	-0.8819191545	0.2692658371	-3.2752731059	0.0010555987	0.0321381019
Contig17286	ref|XP_011883269.1| PREDICTED: rap1 GTPase-GDP dissociation stimulator 1 [Vollenhovia emeryi]	221.0650441205	-0.8819975332	0.2604044774	-3.387029063	0.000706539	0.0229235006
Contig83209	ref|XP_012064353.1| PREDICTED: dnaJ homolog subfamily B member 11 [Atta cephalotes]	39.3733414565	-0.8868587101	0.267319173	-3.3176023252	0.0009079365	0.0283448313
Contig107311	ref|XP_011171823.1| PREDICTED: vesicle-trafficking protein SEC22b [Solenopsis invicta]	973.3545221203	-0.8896053843	0.2713914938	-3.2779412936	0.0010456714	0.0318977186
Contig106653	ref|XP_011866575.1| PREDICTED: probable phospholipid-transporting ATPase IIB isoform X3 [Vollenhovia emeryi]	55.9280383785	-0.8916858059	0.2504735351	-3.5600000845	0.0003708547	0.0134706049
Contig51622	ref|XP_011875497.1| PREDICTED: PC4 and SFRS1-interacting protein [Vollenhovia emeryi]	633.9058669406	-0.8921669692	0.2662631091	-3.3506968813	0.0008060849	0.0256699056
Contig18171	ref|XP_011052663.1| PREDICTED: peptidoglycan-recognition protein LC-like [Acromyrmex echinatior]	156.4230600404	-0.8958038211	0.2479552807	-3.6127636349	0.0003029508	0.011357401
Contig71588	ref|XP_011162291.1| PREDICTED: islet cell autoantigen 1 isoform X1 [Solenopsis invicta]	219.6713006798	-0.8964865881	0.2089359894	-4.290723636	1.78091836437515E-05	0.0012611281
Contig41675	#N/A	27.6434191365	-0.8972153174	0.2832535133	-3.1675346475	0.0015373739	0.0440442659
Contig123317	ref|XP_011640401.1| PREDICTED: transcription factor MafG [Pogonomyrmex barbatus]	114.9526853518	-0.9032223939	0.210551825	-4.2897865833	1.78844896325095E-05	0.0012647771
Contig47680	#N/A	179.4487966538	-0.9060149262	0.2672642899	-3.3899587806	0.0006990313	0.0227164284
Contig61004	#N/A	88.7271858024	-0.906196104	0.269651197	-3.3606233318	0.000777668	0.0248771017
Contig66175	ref|XP_011871964.1| PREDICTED: glutamate--cysteine ligase catalytic subunit isoform X2 [Vollenhovia emeryi]	92.1204049182	-0.9213955271	0.2720903239	-3.3863590364	0.0007082665	0.0229637302
Contig30759	ref|XP_011705990.1| PREDICTED: protein CWC15 homolog B [Wasmannia auropunctata]	268.4209697742	-0.9215437802	0.2849491129	-3.2340643941	0.0012204194	0.0362805793
Contig21176	#N/A	167.3504573096	-0.9241783397	0.2745259199	-3.3664520275	0.0007614182	0.0244513895
Contig12546	ref|XP_011647452.1| PREDICTED: MIT domain-containing protein 1-like [Pogonomyrmex barbatus]	126.9229272347	-0.9313936737	0.2648622056	-3.5165216251	0.000437241	0.0154529383
Contig23704	ref|XP_012054480.1| PREDICTED: ubiquitin-conjugating enzyme E2 J2 [Atta cephalotes]	868.0283442986	-0.9329590749	0.2836038623	-3.2896557448	0.0010031003	0.0308253713
Contig130978	ref|XP_012062405.1| PREDICTED: translocon-associated protein subunit alpha [Atta cephalotes]	220.1382545881	-0.934672177	0.2979733618	-3.1367642106	0.0017082345	0.047938114
Contig74341	#N/A	500.1380799337	-0.9350471335	0.2709995844	-3.4503637172	0.0005598317	0.0189240541
Contig19093	#N/A	49.384178641	-0.9451565713	0.274994887	-3.4369968891	0.0005882024	0.0197006012
Contig49354	ref|XP_011635815.1| PREDICTED: cytosolic Fe-S cluster assembly factor NUBP2 homolog [Pogonomyrmex barbatus]	57.0348478501	-0.9464532516	0.2421066887	-3.9092404123	9.25867871562719E-05	0.0042214376
Contig21538	ref|XP_011694117.1| PREDICTED: signal peptidase complex subunit 3 [Wasmannia auropunctata]	255.0981814028	-0.9516668635	0.2996843231	-3.1755643859	0.0014954533	0.0431298529
Contig24638	ref|XP_011705197.1| PREDICTED: uncharacterized protein LOC105460443 [Wasmannia auropunctata]	198.1460729719	-0.9524637381	0.2726182267	-3.4937639702	0.0004762619	0.0165627126
Contig51021	#N/A	257.2073597048	-0.953512068	0.2938262604	-3.2451560547	0.0011738627	0.0351554228
Contig9010	ref|XP_014483481.1| PREDICTED: uncharacterized protein LOC106749000 isoform X5 [Dinoponera quadriceps]	136.4325770312	-0.9590865868	0.2957171988	-3.243256025	0.0011817197	0.0353457765
Contig7196	ref|XP_011158665.1| PREDICTED: uncharacterized threonine-rich GPI-anchored glycoprotein PJ4664.02-like isoform X2 [Solenopsis invicta]	86.0155488213	-0.9599855147	0.3022452799	-3.1761803364	0.0014922815	0.043049184
Contig24531	ref|XP_011049927.1| PREDICTED: zinc finger CCHC domain-containing protein 8 homolog [Acromyrmex echinatior]	242.3208385357	-0.9604787455	0.3063964157	-3.1347584256	0.0017199569	0.0482191952
Contig25333	ref|XP_011874845.1| PREDICTED: translocon-associated protein subunit gamma [Vollenhovia emeryi]	1435.0130576045	-0.9657076165	0.2955103948	-3.2679311234	0.0010833673	0.0328349517
Contig45980	ref|XP_013793579.1| PREDICTED: actin-85C, partial [Limulus polyphemus]	583.0876038775	-0.977626053	0.2566752355	-3.8088055168	0.0001396397	0.0059197946
Contig54311	#N/A	84.6835362375	-0.9817540902	0.3120183297	-3.1464628732	0.0016525824	0.0467009874
Contig25518	ref|XP_011866399.1| PREDICTED: uncharacterized protein LOC105561224 [Vollenhovia emeryi]	234.1882464056	-0.9826575347	0.2829641992	-3.4727274243	0.0005151983	0.0176752042
Contig23760	ref|XP_011645007.1| PREDICTED: RNA-binding protein 33-like [Pogonomyrmex barbatus]	141.5193869236	-0.9829868621	0.2961618231	-3.3190870176	0.0009031228	0.028207017
Contig57823	ref|XP_012220490.1| PREDICTED: sorting nexin-27 isoform X2 [Linepithema humile]	517.9613535581	-0.9858425812	0.2912367474	-3.3850212578	0.0007117274	0.0230573558
Contig123020	ref|XP_011865172.1| PREDICTED: vanin-like protein 1 isoform X1 [Vollenhovia emeryi]	1578.2210580838	-0.9905156459	0.2996345546	-3.3057457182	0.0009472401	0.0293513557
Contig123483	#N/A	459.9050327254	-0.9917989369	0.3161201993	-3.1374108299	0.0017044711	0.0478610205
Contig35233	ref|XP_011068053.1| PREDICTED: uncharacterized protein LOC105154309 isoform X2 [Acromyrmex echinatior]	69.8829663394	-0.995786025	0.3126483721	-3.1850030699	0.0014475247	0.0419722761
Contig150076	ref|XP_011867750.1| PREDICTED: rab3 GTPase-activating protein non-catalytic subunit isoform X4 [Vollenhovia emeryi]	73.2095718448	-0.9973733106	0.3101207235	-3.2160808193	0.0012995423	0.0383343271
Contig7981	#N/A	34.6791516846	-0.9997055581	0.3154783935	-3.1688558662	0.0015304027	0.0438890417
Contig35499	ref|XP_011687562.1| PREDICTED: dihydropyrimidine dehydrogenase [NADP(+)] [Wasmannia auropunctata]	581.0753227859	-0.9999300986	0.2075834142	-4.8170038168	1.45729901937824E-06	0.0002116259
Contig99484	ref|XP_011878218.1| PREDICTED: choline-phosphate cytidylyltransferase A-like isoform X2 [Vollenhovia emeryi]	34.3764039317	-1.00028508	0.3076625415	-3.2512410352	0.001149024	0.0345212933
Contig96032	#N/A	122.0640630946	-1.0012566687	0.2702402861	-3.7050607186	0.0002113401	0.0083881242
Contig83208	ref|XP_011689807.1| PREDICTED: glycine-rich cell wall structural protein 1.8 isoform X5 [Wasmannia auropunctata]	132.1983626537	-1.0017063999	0.3196329041	-3.1339276625	0.0017248337	0.0483367371
Contig21721	ref|XP_011686185.1| PREDICTED: probable serine/threonine-protein kinase DDB_G0282963 isoform X1 [Wasmannia auropunctata]	1250.5037896664	-1.00419115	0.2874934228	-3.4929186904	0.000477772	0.0166029869
Contig60200	ref|XP_011066270.1| PREDICTED: transcription factor kayak isoform X3 [Acromyrmex echinatior]	105.4007415957	-1.0085611863	0.2225005323	-4.5328484208	5.81935758336087E-06	0.0006154624
Contig12254	#N/A	1512.7705799579	-1.0120390044	0.264686445	-3.8235392229	0.0001315497	0.0056173814
Contig5585	ref|XP_012059427.1| PREDICTED: stress-associated endoplasmic reticulum protein 2 [Atta cephalotes]	1752.2408927621	-1.0128971145	0.3243750905	-3.122610657	0.0017925471	0.0499372086
Contig83418	ref|XP_011163408.1| PREDICTED: serine/threonine-protein kinase pelle [Solenopsis invicta]	37.6361753378	-1.0129857708	0.2853251105	-3.5502860894	0.0003848127	0.0138861207
Contig44610	ref|XP_011060856.1| PREDICTED: lysine--tRNA ligase isoform X2 [Acromyrmex echinatior]	92.0441096821	-1.0148660587	0.2883400316	-3.5196849119	0.0004320597	0.0152851141
Contig40023	ref|XP_012216595.1| PREDICTED: histone acetyltransferase KAT8-like [Linepithema humile]	139.8868960768	-1.0208843803	0.3127489032	-3.2642300891	0.0010976199	0.0331744165
Contig2977	ref|XP_015186792.1| PREDICTED: MOB kinase activator-like 2 isoform X4 [Polistes dominula]	384.5236197308	-1.0210247987	0.2959969319	-3.4494438576	0.0005617425	0.0189614271
Contig7133	ref|XP_011159622.1| PREDICTED: tryptophan--tRNA ligase, cytoplasmic [Solenopsis invicta]	229.4462032387	-1.0217677748	0.3123412936	-3.2713182529	0.0010704737	0.0325348941
Contig26812	#N/A	25.9345148521	-1.0224553864	0.3245407448	-3.1504684788	0.0016300885	0.0462132039
Contig87132	ref|XP_012529985.1| PREDICTED: carboxypeptidase D-like [Monomorium pharaonis]	92.2489132403	-1.0296303451	0.3060919875	-3.3637938498	0.0007687895	0.0246376642
Contig83422	ref|XP_011163408.1| PREDICTED: serine/threonine-protein kinase pelle [Solenopsis invicta]	167.769127324	-1.0304635909	0.3207943122	-3.2122252541	0.0013171106	0.0387312754
Contig65204	ref|XP_003699040.1| PREDICTED: ubiquitin, partial [Apis florea]	1250.3800679259	-1.0305888957	0.3161285192	-3.2600313898	0.0011139988	0.0336131694
Contig29817	ref|XP_011881360.1| PREDICTED: aminoacylase-1-like [Vollenhovia emeryi]	593.0221865939	-1.0314920791	0.3023488367	-3.411595991	0.0006458376	0.0212715411
Contig144973	ref|XP_011063777.1| PREDICTED: bifunctional glutamate/proline--tRNA ligase [Acromyrmex echinatior]	60.3432509824	-1.0321253386	0.320520577	-3.2201531284	0.0012812214	0.037872958
Contig42771	ref|XP_011703583.1| PREDICTED: ubiquinone biosynthesis protein COQ9, mitochondrial [Wasmannia auropunctata]	74.6037586431	-1.0323015378	0.3183755513	-3.2424020424	0.0011852669	0.035436871
Contig134488	ref|XP_011867353.1| PREDICTED: protein FAM8A1 [Vollenhovia emeryi]	220.2095120565	-1.0361540083	0.2930110629	-3.5362282848	0.0004058838	0.014522705
Contig3608	#N/A	186.6477741303	-1.0423344672	0.283407813	-3.6778607345	0.0002351983	0.009162618
Contig119289	#N/A	62.0544777022	-1.0436447098	0.288353706	-3.619321299	0.0002953767	0.0111236254
Contig2066	#N/A	240.2277309481	-1.0464037206	0.3314006463	-3.1575186478	0.0015911806	0.0453010365
Contig1007	ref|XP_011641463.1| PREDICTED: protein Tob1-like [Pogonomyrmex barbatus]	182.565463806	-1.0479875124	0.32880997	-3.1872133088	0.0014365079	0.0416956156
Contig126562	ref|XP_011689830.1| PREDICTED: E3 ubiquitin-protein ligase TRIP12 isoform X4 [Wasmannia auropunctata]	92.5980266057	-1.0495256367	0.3128232419	-3.3550116998	0.0007936163	0.0253221756
Contig69625	#N/A	31.8637946515	-1.0508755378	0.3128497048	-3.3590427665	0.0007821296	0.0250028438
Contig57824	ref|XP_011872035.1| PREDICTED: sorting nexin-27 isoform X2 [Vollenhovia emeryi]	68.1707648817	-1.0515026579	0.3171172205	-3.3158169601	0.0009137566	0.0284870319
Contig111953	ref|XP_011306952.1| PREDICTED: AP-3 complex subunit sigma-2 isoform X2 [Fopius arisanus]	48.8442074269	-1.0570630527	0.3192321706	-3.3112673157	0.0009287444	0.0288530739
Contig25339	#N/A	347.824721492	-1.0616406942	0.2687432496	-3.9503901794	7.80238927418257E-05	0.0037071046
Contig117203	ref|XP_011161660.1| PREDICTED: protein lifeguard 1 isoform X1 [Solenopsis invicta]	308.1159164795	-1.0635835793	0.3162671323	-3.362927951	0.0007712049	0.0247039077
Contig89336	ref|XP_011642855.1| PREDICTED: protein phosphatase 1 regulatory subunit 16A isoform X1 [Pogonomyrmex barbatus]	168.5595024114	-1.0676194149	0.2554433502	-4.1794762487	2.92181231894937E-05	0.0017895246
Contig148264	ref|XP_011870333.1| PREDICTED: exonuclease mut-7 homolog isoform X1 [Vollenhovia emeryi]	177.3465365638	-1.0690083443	0.2739213774	-3.9026101375	9.51609134259536E-05	0.0043192906
Contig3045	#N/A	64.3499267746	-1.06994996	0.3126891595	-3.4217686398	0.0006221523	0.020628687
Contig15491	ref|XP_011641701.1| PREDICTED: cysteine and histidine-rich protein 1 homolog [Pogonomyrmex barbatus]	99.0881083371	-1.0712263836	0.3087857884	-3.4691570143	0.0005220942	0.0178387883
Contig142867	ref|XP_011860747.1| PREDICTED: RNA-binding protein 4.1 isoform X2 [Vollenhovia emeryi]	279.3577852634	-1.071283248	0.3429961266	-3.1233100458	0.0017882926	0.0498545557
Contig84446	ref|XP_015116657.1| PREDICTED: heat shock 70 kDa protein cognate 4 [Diachasma alloeum]	20.3019743822	-1.0764686231	0.302661678	-3.5566730159	0.0003755812	0.0136038172
Contig121655	#N/A	35.808126778	-1.0785148471	0.2552709747	-4.2249803301	2.38961649170069E-05	0.0015467047
Contig10279	ref|XP_012543721.1| PREDICTED: neuferricin [Monomorium pharaonis]	136.8591202623	-1.0800528089	0.2818969799	-3.8313741752	0.0001274295	0.0054528805
Contig9707	ref|XP_012529751.1| PREDICTED: uncharacterized protein C45G9.7 [Monomorium pharaonis]	162.3102411368	-1.0833491965	0.3408059569	-3.1787859766	0.0014789325	0.0427426309
Contig6544	ref|XP_012539365.1| PREDICTED: uncharacterized protein LOC105838383 [Monomorium pharaonis]	85.5597011203	-1.0875645446	0.3318707612	-3.2770724981	0.0010488943	0.0319822234
Contig14383	ref|XP_012522513.1| PREDICTED: armadillo repeat-containing protein 1-like [Monomorium pharaonis]	229.2837228674	-1.0880502671	0.3110498059	-3.4979937183	0.0004687722	0.0163748089
Contig2408	ref|XP_011065272.1| PREDICTED: mesencephalic astrocyte-derived neurotrophic factor homolog [Acromyrmex echinatior]	408.7058569787	-1.0944431106	0.3251512691	-3.3659506039	0.0007628037	0.0244791892
Contig24842	ref|XP_011863192.1| PREDICTED: heat shock 70 kDa protein cognate 3 isoform X1 [Vollenhovia emeryi]	5569.7224861835	-1.0979739173	0.3432150356	-3.1990845488	0.0013786473	0.0402255822
Contig135070	ref|XP_011162854.1| PREDICTED: transcription factor kayak isoform X3 [Solenopsis invicta]	79.4940205271	-1.1000345137	0.2693419777	-4.0841554775	4.42374055493091E-05	0.0024264801
Contig132610	ref|XP_012542053.1| PREDICTED: peptidyl-alpha-hydroxyglycine alpha-amidating lyase 1-like isoform X1 [Monomorium pharaonis]	183.7394323986	-1.1022301023	0.2839402521	-3.8819085847	0.0001036398	0.0046151902
Contig135113	ref|XP_012064353.1| PREDICTED: dnaJ homolog subfamily B member 11 [Atta cephalotes]	71.7793659735	-1.1037352939	0.3393827876	-3.2521840658	0.0011452183	0.0344215941
Contig99726	ref|XP_011881371.1| PREDICTED: protein transport protein Sec61 subunit alpha isoform 2 [Vollenhovia emeryi]	568.8000225397	-1.1068194111	0.3367672825	-3.2866001792	0.001014047	0.0311143965
Contig74605	#N/A	2316.6052278325	-1.1084774647	0.3325439623	-3.333326087	0.000858143	0.0270231857
Contig127749	ref|XP_011882869.1| PREDICTED: bifunctional glutamate/proline--tRNA ligase [Vollenhovia emeryi]	105.721967086	-1.1085748522	0.3193405934	-3.4714498414	0.000517656	0.0177316955
Contig16596	ref|XP_011881360.1| PREDICTED: aminoacylase-1-like [Vollenhovia emeryi]	2215.0216087073	-1.1153621269	0.2924366524	-3.8140298684	0.0001367189	0.0058116652
Contig130977	#N/A	164.524971462	-1.1193599984	0.2640920714	-4.2385217869	2.24996351155788E-05	0.0014766052
Contig48294	ref|XP_011635309.1| PREDICTED: mitotic-spindle organizing protein 1-like isoform X1 [Pogonomyrmex barbatus]	31.4113059037	-1.120777595	0.3302004938	-3.3942335521	0.0006882097	0.0224266537
Contig97355	ref|XP_011686976.1| PREDICTED: valine--tRNA ligase isoform X2 [Wasmannia auropunctata]	260.0208932065	-1.1242671646	0.3373122579	-3.3330160351	0.0008590999	0.0270472905
Contig94576	#N/A	637.5412430537	-1.1270638993	0.3275245833	-3.4411581809	0.0005792298	0.019467991
Contig80891	#N/A	23.1178924089	-1.1300691736	0.3593966642	-3.1443507582	0.0016645579	0.0469642651
Contig12739	#N/A	545.5645445074	-1.1309855372	0.3338799475	-3.3874018058	0.0007055797	0.0229028932
Contig116442	#N/A	705.7755455903	-1.1464932818	0.3604323119	-3.1808837444	0.0014682654	0.0424864822
Contig28442	ref|XP_011706718.1| PREDICTED: coiled-coil and C2 domain-containing protein 1-like [Wasmannia auropunctata]	132.8779859011	-1.1468945383	0.3661080002	-3.1326672389	0.0017322571	0.0484966775
Contig34352	ref|XP_011169051.1| PREDICTED: translocon-associated protein subunit beta [Solenopsis invicta]	628.2687738742	-1.1475005256	0.3540003214	-3.2415239654	0.0011889244	0.0355311859
Contig14496	ref|XP_011637244.1| PREDICTED: putative ferric-chelate reductase 1 homolog [Pogonomyrmex barbatus]	60.3873203581	-1.1504212393	0.3449982832	-3.3345709105	0.0008543112	0.026920518
Contig130421	ref|XP_012530004.1| PREDICTED: mesencephalic astrocyte-derived neurotrophic factor homolog [Monomorium pharaonis]	160.7157029147	-1.1513749091	0.3259245685	-3.5326422753	0.0004114288	0.0146876331
Contig16131	ref|XP_011880989.1| PREDICTED: E3 ubiquitin-protein ligase MYCBP2 isoform X1 [Vollenhovia emeryi]	385.664555728	-1.1520726382	0.3174318661	-3.6293540793	0.0002841313	0.0107834807
Contig102847	#N/A	42.6001438419	-1.1585567628	0.3614808337	-3.2050295746	0.001350486	0.0395653099
Contig123934	#N/A	208.7791011411	-1.1658100043	0.3230955792	-3.608251178	0.000308268	0.0115267666
Contig19964	ref|XP_011164165.1| PREDICTED: aquaporin AQPAn.G-like isoform X1 [Solenopsis invicta]	805.9175321322	-1.1660805154	0.3071259918	-3.7967496941	0.0001466057	0.0061743498
Contig77302	ref|XP_012539060.1| PREDICTED: serine protease inhibitor 3/4-like isoform X1 [Monomorium pharaonis]	2330.466510202	-1.1686363931	0.3057889529	-3.8217089992	0.00013253	0.0056523076
Contig10411	ref|XP_011876820.1| PREDICTED: probable chitinase 3 [Vollenhovia emeryi]	125.4852638312	-1.1721863902	0.2835083141	-4.1345750081	3.55612096455867E-05	0.0020652249
Contig39981	ref|XP_011163411.1| PREDICTED: uncharacterized protein LOC105198409 [Solenopsis invicta]	1351.898876761	-1.1722764072	0.3698788559	-3.1693523125	0.0015277908	0.0438450689
Contig24461	ref|XP_011863302.1| PREDICTED: CD109 antigen-like isoform X2 [Vollenhovia emeryi]	3618.628651971	-1.173963575	0.3731426495	-3.1461522195	0.0016543388	0.0467412737
Contig29104	#N/A	65.2301062838	-1.1781965464	0.3241821631	-3.6343657376	0.0002786653	0.0106073746
Contig5570	ref|XP_012523499.1| PREDICTED: glutamine--fructose-6-phosphate aminotransferase [isomerizing] 2-like isoform X3 [Monomorium pharaonis]	1586.3740256692	-1.1788567795	0.3474118364	-3.3932545066	0.0006906744	0.0224914068
Contig28677	ref|XP_011629994.1| PREDICTED: MAGUK p55 subfamily member 6 isoform X1 [Pogonomyrmex barbatus]	197.4894649912	-1.1830389729	0.3244523473	-3.6462641828	0.0002660804	0.0101721771
Contig74606	ref|XP_015521700.1| PREDICTED: protein transport protein Sec61 subunit alpha isoform 2 [Neodiprion lecontei]	207.8899825247	-1.1867776374	0.3373594294	-3.5178433859	0.0004350691	0.0153838718
Contig31183	ref|XP_011689082.1| PREDICTED: amyloid beta A4 precursor protein-binding family B member 1-interacting protein isoform X3 [Wasmannia auropunctata]	521.0692243632	-1.1867894203	0.3748275987	-3.1662274186	0.0015443001	0.044188936
Contig80858	ref|XP_012525153.1| PREDICTED: protein transport protein Sec61 subunit gamma [Monomorium pharaonis]	288.6659751622	-1.188157199	0.3269821491	-3.6337066177	0.0002793785	0.0106202172
Contig2983	#N/A	20.7740645109	-1.1888734787	0.3790467377	-3.1364825511	0.0017098761	0.0479746555
Contig21356	#N/A	47.0747209297	-1.1893988222	0.3121553995	-3.8102779063	0.0001388107	0.0058881809
Contig20402	ref|XP_011689220.1| PREDICTED: uncharacterized protein LOC105450847 [Wasmannia auropunctata]	569.4855498289	-1.1912666836	0.3618298216	-3.2923396928	0.0009935752	0.0305992152
Contig8544	ref|XP_011861687.1| PREDICTED: thioredoxin-2-like [Vollenhovia emeryi]	422.457783856	-1.1921949462	0.2863991433	-4.1627043031	3.14500531258131E-05	0.0018781903
Contig27701	#N/A	79.0264549573	-1.1975142805	0.3756251943	-3.1880563355	0.0014323263	0.0415827832
Contig37053	ref|XP_011168672.1| PREDICTED: protein sel-1 homolog 1 [Solenopsis invicta]	217.1440398786	-1.1976807634	0.231770837	-5.1675214137	2.37218795550707E-07	0.000049184
Contig4349	ref|XP_011694785.1| PREDICTED: RNA exonuclease 4 isoform X1 [Wasmannia auropunctata]	227.0508221525	-1.198133848	0.3824892561	-3.1324640596	0.0017334565	0.0485206422
Contig20401	ref|XP_011866872.1| PREDICTED: cyclic AMP response element-binding protein A-like [Vollenhovia emeryi]	2186.471786343	-1.2025199972	0.3617467602	-3.3242039167	0.0008867133	0.0277681593
Contig117293	ref|XP_012539441.1| PREDICTED: uncharacterized protein LOC105838433 isoform X1 [Monomorium pharaonis]	112.873982442	-1.2027249165	0.3800904312	-3.1643125367	0.0015544977	0.0444177672
Contig87131	ref|XP_011647483.1| PREDICTED: carboxypeptidase D-like [Pogonomyrmex barbatus]	45.6344546024	-1.2033703005	0.3104188934	-3.8766013471	0.0001059257	0.0046933156
Contig113497	ref|XP_011165102.1| PREDICTED: bifunctional glutamate/proline--tRNA ligase [Solenopsis invicta]	61.918564162	-1.2058459102	0.2913030564	-4.1394893862	0.000034808	0.0020315001
Contig24497	ref|XP_012054033.1| PREDICTED: ero1-like protein [Atta cephalotes]	2010.2997521398	-1.2102015103	0.3467360656	-3.4902671816	0.0004825379	0.0167562427
Contig111567	ref|XP_011165618.1| PREDICTED: mediator of RNA polymerase II transcription subunit 15 [Solenopsis invicta]	33.0257403573	-1.2111361847	0.3800981156	-3.186377767	0.0014406635	0.0417904805
Contig8238	#N/A	25.727629251	-1.2118022463	0.3434546599	-3.5282742899	0.0004182785	0.0148870267
Contig130422	ref|XP_011871381.1| PREDICTED: sushi, von Willebrand factor type A, EGF and pentraxin domain-containing protein 1-like [Vollenhovia emeryi]	640.4745029433	-1.2153310276	0.2874013885	-4.2286887827	2.35057233289862E-05	0.0015277315
Contig31258	ref|XP_012532713.1| PREDICTED: Bardet-Biedl syndrome 7 protein homolog [Monomorium pharaonis]	73.2548624677	-1.2160733987	0.3333938978	-3.6475574586	0.0002647451	0.0101375857
Contig35497	ref|XP_012536572.1| PREDICTED: dihydropyrimidine dehydrogenase [NADP(+)] [Monomorium pharaonis]	75.9429477616	-1.2169305547	0.2733242877	-4.4523323013	8.49425749604853E-06	0.0007961026
Contig148603	#N/A	320.9456022066	-1.2185463287	0.3714505557	-3.2805074865	0.0010362051	0.031691056
Contig26139	ref|XP_011703287.1| PREDICTED: RNA polymerase II subunit A C-terminal domain phosphatase isoform X2 [Wasmannia auropunctata]	490.3146556888	-1.2216789639	0.3647372438	-3.3494768755	0.0008096431	0.0257541977
Contig147746	ref|XP_012061886.1| PREDICTED: mediator of RNA polymerase II transcription subunit 25 [Atta cephalotes]	189.8404679665	-1.2231205001	0.3896756154	-3.1388171388	0.0016963127	0.0476698273
Contig3061	#N/A	42.8424566231	-1.2237907344	0.3400824409	-3.5985119706	0.0003200431	0.0118940381
Contig130451	ref|XP_011868356.1| PREDICTED: solute carrier family 25 member 36-A [Vollenhovia emeryi]	411.1705301315	-1.2252548429	0.3307603577	-3.7043581992	0.0002119266	0.0084090411
Contig141248	ref|XP_011629692.1| PREDICTED: sphingomyelin synthase-related protein 1 isoform X1 [Pogonomyrmex barbatus]	104.7807131065	-1.2312711155	0.3906649666	-3.1517315881	0.001623054	0.0460599831
Contig109908	ref|XP_011066050.1| PREDICTED: mediator of RNA polymerase II transcription subunit 16 isoform X1 [Acromyrmex echinatior]	148.8914870586	-1.2327703021	0.3325804194	-3.7066833471	0.0002099912	0.0083416167
Contig9238	ref|XP_011879037.1| PREDICTED: ubiquitin-conjugating enzyme E2 J1-like [Vollenhovia emeryi]	556.3702998938	-1.2362859726	0.350147101	-3.5307616967	0.0004143649	0.0147737863
Contig622	#N/A	1105.8422537737	-1.2369944359	0.3288240142	-3.7618737762	0.0001686452	0.0069149898
Contig31549	#N/A	779.9452140179	-1.2434087016	0.3602132204	-3.4518685907	0.0005567188	0.018845878
Contig112676	ref|XP_012063715.1| PREDICTED: protein sel-1 homolog 1 [Atta cephalotes]	303.5313180448	-1.2484738073	0.2426529706	-5.1451000339	2.67378294236204E-07	5.36644188078025E-05
Contig2440	ref|XP_014485239.1| PREDICTED: heat shock 70 kDa protein cognate 3 [Dinoponera quadriceps]	1856.5277073544	-1.250156702	0.3753235772	-3.330877083	0.0008657282	0.0272256395
Contig26012	ref|XP_011685463.1| PREDICTED: histone acetyltransferase KAT8 [Wasmannia auropunctata]	77.8010898382	-1.2510037608	0.3456855765	-3.6189064454	0.0002958506	0.0111340848
Contig13130	ref|XP_011156622.1| PREDICTED: uncharacterized protein LOC105193745 [Solenopsis invicta]	31.0023857585	-1.2528022794	0.3785066261	-3.309855609	0.0009334411	0.0289809772
Contig15228	ref|XP_011168512.1| PREDICTED: heat shock 70 kDa protein cognate 3 isoform X3 [Solenopsis invicta]	1080.2488993225	-1.2556430335	0.3713108683	-3.3816490191	0.0007205214	0.0232915838
Contig133376	ref|XP_011159247.1| PREDICTED: glutamine--fructose-6-phosphate aminotransferase [isomerizing] 1-like, partial [Solenopsis invicta]	174.0287772035	-1.2576668364	0.3982766173	-3.1577722161	0.0015897973	0.0452799005
Contig135053	ref|XP_011643111.1| PREDICTED: alaserpin-like isoform X5 [Pogonomyrmex barbatus]	196.127871748	-1.2586733386	0.3107149908	-4.050893507	5.10224262088457E-05	0.0026984609
Contig11041	ref|XP_012063008.1| PREDICTED: proteolipid protein DM beta [Atta cephalotes]	70.5566129411	-1.2595773992	0.3760209485	-3.3497532631	0.0008088357	0.0257401046
Contig122799	#N/A	227.3818674418	-1.2600011749	0.3956303971	-3.184793646	0.0014485726	0.0419940429
Contig145847	ref|XP_011705986.1| PREDICTED: titin-like [Wasmannia auropunctata]	40.4617298379	-1.2603112539	0.2976122489	-4.2347425496	2.2881369656961E-05	0.0014947152
Contig30324	ref|XP_011861687.1| PREDICTED: thioredoxin-2-like [Vollenhovia emeryi]	717.7847945368	-1.2640778389	0.2787303058	-4.5351288064	5.75683413889077E-06	0.0006102201
Contig43329	ref|XP_011692346.1| PREDICTED: bifunctional glutamate/proline--tRNA ligase [Wasmannia auropunctata]	25.2086998105	-1.2691270025	0.3696829553	-3.4330146533	0.0005969098	0.0199483371
Contig119270	ref|XP_011697851.1| PREDICTED: uncharacterized protein LOC105455873 [Wasmannia auropunctata]	104.4737559318	-1.2696629819	0.3818441321	-3.3250818202	0.0008839259	0.0277054301
Contig129267	ref|XP_012537205.1| PREDICTED: serpin B3-like [Monomorium pharaonis]	1545.5923694228	-1.2701228747	0.4003701793	-3.1723713214	0.0015119955	0.0434842228
Contig4239	ref|XP_012270009.1| PREDICTED: uncharacterized protein LOC105694175 isoform X2 [Orussus abietinus]	46.1017262148	-1.2719419448	0.2694487531	-4.7205337947	2.35226521225993E-06	0.0003103343
Contig150089	ref|XP_012226453.1| PREDICTED: leukotriene A-4 hydrolase [Linepithema humile]	24.6969037408	-1.2723416035	0.2783212335	-4.5714859324	4.84277806054123E-06	0.0005374048
Contig138480	ref|XP_012221134.1| PREDICTED: sodium/potassium-transporting ATPase subunit beta-2-like [Linepithema humile]	109.7422408081	-1.2729625627	0.3353490511	-3.7959330981	0.0001470892	0.006191021
Contig112632	ref|XP_011168508.1| PREDICTED: heat shock 70 kDa protein cognate 3 isoform X1 [Solenopsis invicta]	1030.782070484	-1.275000355	0.3777275577	-3.3754496572	0.0007369517	0.0237574879
Contig130510	ref|XP_011158423.1| PREDICTED: cyclic AMP response element-binding protein A-like [Solenopsis invicta]	88.1974174169	-1.2779974105	0.396601016	-3.2223755333	0.0012713239	0.0376039879
Contig39006	#N/A	19.4089336823	-1.2793662339	0.3562290819	-3.591414342	0.0003288883	0.0121683495
Contig34844	ref|XP_011684960.1| PREDICTED: anaphase-promoting complex subunit 1 [Wasmannia auropunctata]	430.6268460344	-1.281338887	0.3521859736	-3.6382450836	0.0002745021	0.0104658202
Contig25584	ref|XP_012062001.1| PREDICTED: LOW QUALITY PROTEIN: lipid storage droplets surface-binding protein 2-like, partial [Atta cephalotes]	240.0116837451	-1.2873271433	0.3995499338	-3.2219430776	0.0012732443	0.0376529085
Contig21143	ref|XP_012062016.1| PREDICTED: F-box only protein 44-like [Atta cephalotes]	88.9721950462	-1.2930222324	0.3488105245	-3.7069473014	0.0002097726	0.0083373485
Contig2416	ref|XP_011700663.1| PREDICTED: geranylgeranyl pyrophosphate synthase [Wasmannia auropunctata]	68.600278752	-1.2940744869	0.3692542537	-3.5045621649	0.0004573588	0.0160395689
Contig34850	ref|XP_011052261.1| PREDICTED: protein O-mannosyl-transferase 2 isoform X1 [Acromyrmex echinatior]	269.3895546501	-1.2967216405	0.3977702786	-3.259976198	0.0011142156	0.0336131694
Contig36397	ref|XP_011162545.1| PREDICTED: protein BTG4-like [Solenopsis invicta]	272.8423585621	-1.2998367031	0.3564035695	-3.6470922689	0.0002652247	0.0101476997
Contig6866	ref|XP_012541782.1| PREDICTED: syntenin-1-like [Monomorium pharaonis]	1093.3325778722	-1.3003158703	0.2975907079	-4.369477392	1.24544232500088E-05	0.0010067349
Contig15838	ref|XP_011058112.1| PREDICTED: uncharacterized protein LOC105148226 isoform X1 [Acromyrmex echinatior]	498.797152621	-1.3030935798	0.2939253746	-4.4334164126	9.27514767751226E-06	0.0008422561
Contig1411	#N/A	153.1262835906	-1.3048514124	0.3198245926	-4.079897051	4.50556503492281E-05	0.0024646644
Contig36347	ref|XP_011163603.1| PREDICTED: signal-induced proliferation-associated 1-like protein 1 isoform X1 [Solenopsis invicta]	112.0395482002	-1.3049152218	0.3279932948	-3.9784813969	6.93568367692667E-05	0.0033711431
Contig13355	ref|XP_011874315.1| PREDICTED: uncharacterized protein LOC105565601 [Vollenhovia emeryi]	1008.4587772006	-1.3079316288	0.3569633975	-3.6640496975	0.0002482586	0.0095999433
Contig29386	ref|XP_011167789.1| PREDICTED: histone deacetylase complex subunit SAP130-B isoform X1 [Solenopsis invicta]	834.9260419575	-1.3134736899	0.3660015102	-3.588711121	0.0003323168	0.0122887647
Contig108311	#N/A	215.414674954	-1.3170919939	0.3998714362	-3.2937886401	0.000988468	0.0304884428
Contig2108	#N/A	9.5240697511	-1.320281128	0.4116315121	-3.2074345361	0.0013392454	0.0392840675
Contig122683	ref|XP_012543609.1| PREDICTED: cytochrome P450 9e2-like [Monomorium pharaonis]	33.9545132834	-1.3255946748	0.4103401057	-3.2304779774	0.0012358342	0.0366830112
Contig130454	#N/A	75.4492424011	-1.3272842898	0.3453372401	-3.8434438447	0.0001213198	0.0052230711
Contig127354	#N/A	218.2736494024	-1.3292517525	0.3441229267	-3.8627236062	0.0001121298	0.0049021075
Contig23488	ref|XP_011156622.1| PREDICTED: uncharacterized protein LOC105193745 [Solenopsis invicta]	30.1369656878	-1.3311503679	0.3758512238	-3.5416949144	0.000397565	0.0142745766
Contig21028	ref|XP_011878382.1| PREDICTED: lipid storage droplets surface-binding protein 2-like isoform X1 [Vollenhovia emeryi]	6652.170748326	-1.3353278449	0.4005930356	-3.3333775833	0.0008579842	0.0270231857
Contig58988	ref|XP_012535964.1| PREDICTED: aquaporin AQPAn.G isoform X1 [Monomorium pharaonis]	99.1804378954	-1.3359100408	0.4219945152	-3.1657047491	0.0015470774	0.044238102
Contig2642	ref|XP_011055868.1| PREDICTED: mannose-1-phosphate guanyltransferase alpha [Acromyrmex echinatior]	473.0645956228	-1.3367552006	0.3234916317	-4.1322713463	3.59196022781995E-05	0.0020834696
Contig112633	ref|XP_014485239.1| PREDICTED: heat shock 70 kDa protein cognate 3 [Dinoponera quadriceps]	472.8902009275	-1.3377909888	0.3814056271	-3.5075281898	0.0004522904	0.0158894284
Contig4230	ref|XP_012057751.1| PREDICTED: N-acetylserotonin O-methyltransferase-like protein [Atta cephalotes]	1495.3225666351	-1.3383905943	0.3299899979	-4.0558520034	4.9951882201966E-05	0.0026604037
Contig36508	ref|XP_011686157.1| PREDICTED: serpin B4-like [Wasmannia auropunctata]	434.2124175547	-1.3453540632	0.3986752643	-3.3745611622	0.0007393348	0.0238234426
Contig119651	ref|XP_012525153.1| PREDICTED: protein transport protein Sec61 subunit gamma [Monomorium pharaonis]	55.9408581775	-1.3467558378	0.4000615645	-3.3663714721	0.0007616407	0.0244529744
Contig118307	ref|XP_011644129.1| PREDICTED: pre-mRNA cleavage complex 2 protein Pcf11-like isoform X1 [Pogonomyrmex barbatus]	107.1280725466	-1.3514211659	0.3403661085	-3.9704927492	7.17241390281426E-05	0.0034588415
Contig39982	ref|XP_011691788.1| PREDICTED: uncharacterized protein LOC105452417 isoform X2 [Wasmannia auropunctata]	222.059883911	-1.363773642	0.3723880787	-3.6622376497	0.0002500218	0.0096575515
Contig34351	ref|XP_011692566.1| PREDICTED: translocon-associated protein subunit beta [Wasmannia auropunctata]	235.942788864	-1.3682267679	0.3694603078	-3.7033119361	0.000212803	0.0084319738
Contig106710	#N/A	47.665899457	-1.3699916201	0.3190117328	-4.2944866259	1.7509803574802E-05	0.0012508002
Contig36517	ref|XP_011165813.1| PREDICTED: N-(5-amino-5-carboxypentanoyl)-L-cysteinyl-D-valine synthase [Solenopsis invicta]	532.7951935297	-1.3701277677	0.4338583811	-3.1580069155	0.0015885179	0.0452525833
Contig13528	ref|XP_012064068.1| PREDICTED: uncharacterized protein LOC105627397 [Atta cephalotes]	104.1914989469	-1.3711309555	0.3414877601	-4.0151686701	5.94032967834329E-05	0.0029976813
Contig5368	ref|XP_012525995.1| PREDICTED: uncharacterized protein LOC105830881 isoform X2 [Monomorium pharaonis]	198.1898152444	-1.3719845258	0.388773655	-3.5290059092	0.0004171238	0.0148646517
Contig43317	ref|XP_011159536.1| PREDICTED: lambda-crystallin homolog [Solenopsis invicta]	632.8836572457	-1.3836202024	0.4009601236	-3.4507675978	0.0005589947	0.0189093306
Contig2206	#N/A	610.8874529965	-1.3837271205	0.4025425647	-3.4374678405	0.0005871804	0.0196883804
Contig31325	ref|XP_011161098.1| PREDICTED: elongation of very long chain fatty acids protein AAEL008004 [Solenopsis invicta]	643.8140095357	-1.3876881305	0.4146316033	-3.3467977824	0.0008175082	0.0259328779
Contig102881	ref|XP_011703223.1| PREDICTED: armadillo repeat-containing protein 6 homolog [Wasmannia auropunctata]	154.3285004905	-1.3879740511	0.419521397	-3.3084702257	0.0009380716	0.0291119485
Contig4238	ref|XP_012060375.1| PREDICTED: growth factor receptor-bound protein 7-like [Atta cephalotes]	684.2930563951	-1.3908202899	0.3830936157	-3.6304971758	0.0002828758	0.0107416022
Contig4199	#N/A	34.5739105022	-1.3922605503	0.4043096595	-3.4435500552	0.0005741303	0.019310376
Contig21613	ref|XP_011173362.1| PREDICTED: LOW QUALITY PROTEIN: uncharacterized protein LOC105205640 [Solenopsis invicta]	324.6944118658	-1.3946891555	0.382406974	-3.6471331599	0.0002651825	0.0101476997
Contig23226	#N/A	26.3369076294	-1.3948372567	0.4055496767	-3.4393745987	0.0005830598	0.01956879
Contig132421	ref|XP_011692346.1| PREDICTED: bifunctional glutamate/proline--tRNA ligase [Wasmannia auropunctata]	80.9857096379	-1.3952140442	0.3857433465	-3.6169490848	0.0002980959	0.0111992881
Contig13890	ref|XP_011172819.1| PREDICTED: cytochrome P450 9e2-like [Solenopsis invicta]	43.5168128698	-1.396715182	0.3913352789	-3.5691011196	0.0003582082	0.0130992838
Contig137765	#N/A	43.4342943059	-1.4000269764	0.4329706876	-3.2335375498	0.0012226726	0.0363399186
Contig12598	#N/A	228.5033816621	-1.4000535093	0.372177405	-3.7617907228	0.0001687012	0.0069152801
Contig32195	#N/A	1303.5686574782	-1.4029524154	0.4296045388	-3.26568341	0.0010920026	0.0330399774
Contig86448	ref|XP_011167111.1| PREDICTED: uncharacterized protein LOC105200995 isoform X1 [Solenopsis invicta]	125.9947726908	-1.4111824761	0.4422015337	-3.1912654491	0.0014165107	0.0411913387
Contig13895	ref|XP_011861887.1| PREDICTED: LOW QUALITY PROTEIN: uncharacterized protein LOC105558679 [Vollenhovia emeryi]	72.175940763	-1.4143638534	0.4297817063	-3.2908889153	0.0009987134	0.0307239737
Contig28379	ref|XP_012144276.1| PREDICTED: uncharacterized protein LOC100882592 isoform X1 [Megachile rotundata]	117.4817562841	-1.4156634108	0.3134456556	-4.5164556782	6.28832713904086E-06	0.000647433
Contig150102	ref|XP_011691812.1| PREDICTED: four-domain proteases inhibitor-like [Wasmannia auropunctata]	256.0246607332	-1.4168335974	0.3724954657	-3.803626427	0.0001425932	0.006034138
Contig15393	ref|XP_011695845.1| PREDICTED: alkyldihydroxyacetonephosphate synthase [Wasmannia auropunctata]	26.6774317275	-1.4189433561	0.4419756726	-3.2104557879	0.0013252465	0.0389300124
Contig13691	ref|XP_011879867.1| PREDICTED: probable phospholipid-transporting ATPase IF isoform X2 [Vollenhovia emeryi]	20.4534586485	-1.4198860843	0.4517157426	-3.1433176896	0.0016704444	0.0471209375
Contig111848	ref|XP_012538176.1| PREDICTED: serine/threonine-protein kinase pelle [Monomorium pharaonis]	41.014463875	-1.4208515838	0.4199785151	-3.3831530251	0.0007165869	0.0231909259
Contig43331	ref|XP_014485239.1| PREDICTED: heat shock 70 kDa protein cognate 3 [Dinoponera quadriceps]	481.6611794258	-1.4217965696	0.3699046799	-3.8436836482	0.0001212012	0.0052195579
Contig6220	ref|XP_011067084.1| PREDICTED: uncharacterized protein LOC105153752 [Acromyrmex echinatior]	22712.8823931166	-1.4219949388	0.4124920023	-3.4473272954	0.0005661623	0.0191060491
Contig87187	ref|XP_012540269.1| PREDICTED: asparagine synthetase [glutamine-hydrolyzing] [Monomorium pharaonis]	124.230384061	-1.4221201012	0.4115991342	-3.4551095543	0.0005500693	0.0186610172
Contig140051	#N/A	74.3442109211	-1.424695779	0.4192718042	-3.3980243001	0.0006787439	0.0221567362
Contig128920	#N/A	48.8883847663	-1.4274754134	0.3581155975	-3.9860743948	6.71754572424375E-05	0.0032911548
Contig5117	ref|XP_012524306.1| PREDICTED: probable chitinase 3 [Monomorium pharaonis]	270.0225282634	-1.428046236	0.3596228241	-3.9709555127	7.15849469139179E-05	0.0034544871
Contig148063	ref|XP_011686888.1| PREDICTED: U3 small nucleolar RNA-associated protein 6 homolog [Wasmannia auropunctata]	114.4559236125	-1.4291250027	0.3703056761	-3.8593116308	0.0001137069	0.004952663
Contig23559	ref|XP_011691124.1| PREDICTED: transmembrane protein 214-B [Wasmannia auropunctata]	1728.5367466326	-1.4467314885	0.3923458937	-3.6873878685	0.0002265679	0.0088926004
Contig132316	ref|XP_012059196.1| PREDICTED: translocating chain-associated membrane protein 1 [Atta cephalotes]	1245.6940055935	-1.447060202	0.4255607461	-3.4003610888	0.0006729692	0.0219937339
Contig22087	#N/A	781.8243546967	-1.4485102871	0.412670426	-3.5100898826	0.0004479552	0.0157763539
Contig29385	ref|XP_011167797.1| PREDICTED: ribosome biogenesis protein TSR3 homolog [Solenopsis invicta]	387.3241790837	-1.4523053941	0.3518296661	-4.1278650833	3.66146825888497E-05	0.0021087734
Contig31181	ref|XP_011054507.1| PREDICTED: amyloid beta A4 precursor protein-binding family B member 1-interacting protein-like isoform X3 [Acromyrmex echinatior]	23.7713469219	-1.4574593647	0.4282402863	-3.4033681819	0.0006656052	0.0218259505
Contig21467	ref|XP_012524156.1| PREDICTED: uncharacterized protein LOC105829670 [Monomorium pharaonis]	936.2902179697	-1.4583922813	0.4200159627	-3.4722306072	0.0005161528	0.0176973636
Contig16206	ref|XP_011705946.1| PREDICTED: coagulation factor IX-like, partial [Wasmannia auropunctata]	1252.369422318	-1.4624801164	0.4340785559	-3.3691600206	0.0007539764	0.0242730933
Contig74237	#N/A	274.3224249863	-1.4684975362	0.3629332034	-4.0461923092	5.20574719305158E-05	0.0027374636
Contig17000	ref|XP_011058559.1| PREDICTED: protein prenyltransferase alpha subunit repeat-containing protein 1 isoform X2 [Acromyrmex echinatior]	132.0945923288	-1.4713254425	0.388743642	-3.7848218818	0.0001538187	0.006398034
Contig99727	ref|XP_011638975.1| PREDICTED: protein transport protein Sec61 subunit alpha isoform 2 [Pogonomyrmex barbatus]	216.7321885458	-1.4718049842	0.3504079392	-4.2002615219	2.66606851554109E-05	0.0016690628
Contig18762	ref|XP_011058115.1| PREDICTED: uncharacterized protein LOC105148226 isoform X3 [Acromyrmex echinatior]	786.6721491797	-1.4749877138	0.3320213766	-4.4424480404	8.89411156921127E-06	0.0008212989
Contig32583	ref|XP_011867217.1| PREDICTED: uncharacterized protein LOC105561657 isoform X2 [Vollenhovia emeryi]	46.1038350109	-1.4778717041	0.4519185235	-3.2702171459	0.0010746496	0.0326348426
Contig820	#N/A	755.235378691	-1.4864952161	0.439605667	-3.3814286936	0.0007210995	0.0233017307
Contig111850	ref|XP_011640598.1| PREDICTED: LOW QUALITY PROTEIN: serine/threonine-protein kinase pelle [Pogonomyrmex barbatus]	26.3578682612	-1.4963144117	0.3779828158	-3.9586837001	0.000075364	0.0036085063
Contig119271	ref|XP_014473486.1| PREDICTED: uncharacterized protein LOC106743802 [Dinoponera quadriceps]	895.4725584884	-1.4970228964	0.3717661017	-4.0267869754	5.65442170102717E-05	0.0028926605
Contig17	#N/A	853.5540637024	-1.4981989674	0.4114483673	-3.6412806233	0.0002712852	0.0103543463
Contig44755	#N/A	95.6706687442	-1.5015010638	0.4623171725	-3.24777264	0.0011631217	0.0348781003
Contig48684	ref|XP_011866751.1| PREDICTED: uncharacterized protein LOC105561407 [Vollenhovia emeryi]	44.0220505881	-1.5035617006	0.3854285598	-3.9010126842	9.57911310748049E-05	0.0043464995
Contig14253	ref|XP_011875167.1| PREDICTED: putative epidermal cell surface receptor [Vollenhovia emeryi]	66.9550946083	-1.5080270472	0.458731672	-3.2873837566	0.0010112293	0.0310414215
Contig10743	#N/A	568.1670656599	-1.5104502108	0.3449577755	-4.3786524559	1.19415390013138E-05	0.0009865326
Contig70114	ref|XP_011696298.1| PREDICTED: activating signal cointegrator 1 complex subunit 2 [Wasmannia auropunctata]	389.2389400767	-1.5161130508	0.4333806746	-3.4983402344	0.0004681635	0.0163697342
Contig117294	#N/A	251.3163169946	-1.5214649366	0.4001149859	-3.8025692373	0.0001432032	0.0060490841
Contig91466	ref|XP_011059552.1| PREDICTED: uncharacterized protein LOC105149085 [Acromyrmex echinatior]	90.139512774	-1.527274906	0.3794981794	-4.0244591123	5.7106414362592E-05	0.0029077351
Contig8959	ref|XP_011861420.1| PREDICTED: antichymotrypsin-2-like isoform X6 [Vollenhovia emeryi]	444.1006230124	-1.5290783013	0.435767418	-3.5089321465	0.0004499097	0.0158294041
Contig27451	ref|XP_011690056.1| PREDICTED: 2-oxoglutarate dehydrogenase, mitochondrial isoform X5 [Wasmannia auropunctata]	3763.2998775247	-1.5296694741	0.4868121703	-3.1422169932	0.0016767372	0.0472607095
Contig50844	ref|XP_011686939.1| PREDICTED: CD109 antigen-like isoform X5 [Wasmannia auropunctata]	65.6616621105	-1.5301676668	0.4710428383	-3.2484681699	0.0011602819	0.0348151096
Contig28574	ref|XP_011162771.1| PREDICTED: protein orai-2-like [Solenopsis invicta]	123.4980988182	-1.5318389158	0.4270989553	-3.5866135867	0.0003350002	0.0123815119
Contig5638	#N/A	21.1687842996	-1.5338254622	0.3973138202	-3.8604885714	0.0001131605	0.0049358036
Contig16982	ref|XP_011058469.1| PREDICTED: protein groucho-1-like isoform X3 [Acromyrmex echinatior]	47.5613827147	-1.535073554	0.4700800741	-3.2655575904	0.0010924879	0.0330475829
Contig89363	#N/A	44.8737813729	-1.5402065424	0.4646567306	-3.3147191051	0.0009173526	0.0285693551
Contig12050	ref|XP_011700764.1| PREDICTED: uncharacterized protein LOC105457648 [Wasmannia auropunctata]	17.7180864809	-1.540586661	0.4883984616	-3.1543642788	0.0016084817	0.0457291035
Contig116395	ref|XP_011881761.1| PREDICTED: G-protein coupled receptor moody isoform X1 [Vollenhovia emeryi]	38.0580050564	-1.541953938	0.3732919686	-4.130691436	3.61673769258252E-05	0.0020952611
Contig25463	ref|XP_011686640.1| PREDICTED: uncharacterized protein LOC105449245 isoform X1 [Wasmannia auropunctata]	31.1153702797	-1.5419667646	0.3784546263	-4.0743768408	4.61377214236866E-05	0.0025109348
Contig63819	#N/A	17.8503789468	-1.5429512068	0.4488176041	-3.4378134744	0.0005864315	0.019672605
Contig121080	ref|XP_011877941.1| PREDICTED: phosphoinositide 3-kinase regulatory subunit 4 isoform X1 [Vollenhovia emeryi]	226.3674655244	-1.5457492215	0.4266725068	-3.6228001495	0.000291431	0.0110102471
Contig35858	#N/A	17.7893839416	-1.5481779524	0.4647329949	-3.3313278152	0.0008643275	0.0271876416
Contig32194	#N/A	106.8218071036	-1.5485051043	0.4376421981	-3.5382902085	0.0004027272	0.0144243702
Contig27667	ref|XP_011069065.1| PREDICTED: mitoferrin-1 [Acromyrmex echinatior]	32.9706856743	-1.5534909424	0.3963757741	-3.9192378641	8.88294150815274E-05	0.0040857194
Contig26132	#N/A	117.7490323577	-1.5571742672	0.493345545	-3.1563561948	0.0015975364	0.045463666
Contig74607	ref|XP_012057903.1| PREDICTED: protein transport protein Sec61 subunit alpha isoform 2 [Atta cephalotes]	201.5390264428	-1.5576705592	0.3339226352	-4.6647648139	3.08970207967494E-06	0.0003849785
Contig12547	ref|XP_011871349.1| PREDICTED: protein inscuteable homolog [Vollenhovia emeryi]	77.3354990104	-1.5625635292	0.4768752704	-3.2766713356	0.0010503856	0.0320207844
Contig63786	ref|XP_011691453.1| PREDICTED: lipid storage droplets surface-binding protein 2-like isoform X1 [Wasmannia auropunctata]	715.2391182695	-1.5685167265	0.3810272015	-4.1165479009	3.84589427898462E-05	0.0021771367
Contig115333	#N/A	33.3657233406	-1.5717981285	0.3949085129	-3.980157624	6.88695881190225E-05	0.0033543834
Contig63225	ref|XP_011694453.1| PREDICTED: probable chitinase 3 [Wasmannia auropunctata]	53.4986511249	-1.5773010145	0.3889377826	-4.0554070214	5.00470776992681E-05	0.0026644695
Contig127759	ref|XP_011862229.1| PREDICTED: methyltransferase-like protein 16 homolog [Vollenhovia emeryi]	119.4124535606	-1.5775438943	0.4177756002	-3.776055599	0.0001593314	0.0065904726
Contig43328	ref|XP_011882869.1| PREDICTED: bifunctional glutamate/proline--tRNA ligase [Vollenhovia emeryi]	87.335243965	-1.5785935932	0.4189839944	-3.7676703983	0.0001647781	0.0067800367
Contig139358	ref|XP_011879037.1| PREDICTED: ubiquitin-conjugating enzyme E2 J1-like [Vollenhovia emeryi]	308.2660404995	-1.5790183716	0.3925131928	-4.0228415261	5.75001874817019E-05	0.0029225194
Contig7175	ref|XP_011880048.1| PREDICTED: bone morphogenetic protein 6 [Vollenhovia emeryi]	37.7243127553	-1.5811804374	0.4245171841	-3.7246559069	0.0001955818	0.007857584
Contig49799	ref|XP_011162466.1| PREDICTED: unconventional myosin-If-like [Solenopsis invicta]	52.373190477	-1.5975340696	0.4852602128	-3.2921183884	0.0009943574	0.0306035661
Contig21008	#N/A	9.8173284372	-1.5999403291	0.4278149519	-3.7397952598	0.0001841702	0.0074692013
Contig9317	ref|XP_011861420.1| PREDICTED: antichymotrypsin-2-like isoform X6 [Vollenhovia emeryi]	593.485779137	-1.6018938431	0.4590877604	-3.4892976488	0.0004842916	0.0167929298
Contig38294	#N/A	170.0730581234	-1.605454061	0.4538089996	-3.537730769	0.0004035813	0.0144513009
Contig114264	ref|XP_012527361.1| PREDICTED: glycine-rich protein DOT1-like [Monomorium pharaonis]	12725.9097874937	-1.6092981081	0.5073865531	-3.1717397676	0.0015152872	0.0435350837
Contig50875	#N/A	110.4566994297	-1.6095392082	0.4978675729	-3.2328661189	0.0012255498	0.036401265
Contig145100	ref|XP_012526136.1| PREDICTED: N-(5-amino-5-carboxypentanoyl)-L-cysteinyl-D-valine synthase [Monomorium pharaonis]	326.5342683759	-1.6148669118	0.4015243018	-4.0218410306	0.000057745	0.0029336484
Contig4931	ref|XP_014484036.1| PREDICTED: asparagine--tRNA ligase, cytoplasmic isoform X1 [Dinoponera quadriceps]	1550.3842162869	-1.6189553896	0.4121150106	-3.9284067506	8.55104949927709E-05	0.0039718529
Contig142033	#N/A	174.4926836338	-1.6210986567	0.4264370407	-3.8014958883	0.0001438251	0.0060717236
Contig78894	ref|XP_011704367.1| PREDICTED: antichymotrypsin-2-like isoform X10 [Wasmannia auropunctata]	288.089665805	-1.6237098951	0.4629060776	-3.507644366	0.000452093	0.0158868896
Contig73	#N/A	401.6470935149	-1.6256337628	0.5030058529	-3.2318386622	0.0012299648	0.0365182467
Contig63749	#N/A	253.3000134497	-1.6303782074	0.4294618712	-3.7963281879	0.0001468551	0.0061830093
Contig10828	ref|XP_012055985.1| PREDICTED: RNA polymerase II elongation factor Ell [Atta cephalotes]	63.0304550385	-1.6320946726	0.4608964786	-3.5411307058	0.0003984162	0.0142953295
Contig123887	ref|XP_011705852.1| PREDICTED: RNA-binding protein NOB1 [Wasmannia auropunctata]	315.8211974523	-1.6334868629	0.4039921583	-4.0433627964	0.00005269	0.0027543241
Contig23155	ref|XP_011704367.1| PREDICTED: antichymotrypsin-2-like isoform X10 [Wasmannia auropunctata]	974.5682038774	-1.6365736018	0.4314859485	-3.7928780934	0.0001489113	0.0062435359
Contig65182	#N/A	12.6728246165	-1.6400920384	0.4264821491	-3.8456288071	0.0001202437	0.0051941519
Contig81837	#N/A	9.8178243499	-1.6405153352	0.4658014151	-3.5219200332	0.0004284334	0.0151872424
Contig38425	ref|XP_012217420.1| PREDICTED: uncharacterized protein LOC105669190 [Linepithema humile]	929.1414377153	-1.6407192324	0.4791405126	-3.4242966085	0.0006163931	0.0204626095
Contig15362	#N/A	49.4168102276	-1.6408445028	0.4966132557	-3.3040690798	0.0009529235	0.0294757507
Contig121145	ref|XP_012056634.1| PREDICTED: insulin receptor-like [Atta cephalotes]	84.0991726024	-1.64674739	0.5172671832	-3.1835528013	0.0014547958	0.042148509
Contig37071	ref|XP_011690057.1| PREDICTED: 2-oxoglutarate dehydrogenase, mitochondrial isoform X6 [Wasmannia auropunctata]	750.7909770376	-1.6481230115	0.4845837575	-3.4011107179	0.0006711264	0.0219560423
Contig74760	ref|XP_011062073.1| PREDICTED: uncharacterized protein LOC105150588 [Acromyrmex echinatior]	10.7824132471	-1.6540538381	0.4817243634	-3.4336105122	0.0005955994	0.0199139617
Contig1174	ref|XP_011878059.1| PREDICTED: uncharacterized protein LOC105567640 isoform X1 [Vollenhovia emeryi]	366.6270075873	-1.654295436	0.4130040894	-4.0055182948	6.18816438350777E-05	0.0030907355
Contig105113	#N/A	16.2485980525	-1.6552027575	0.460637735	-3.5932852035	0.0003265348	0.0120912289
Contig135762	ref|XP_011866578.1| PREDICTED: tubulointerstitial nephritis antigen-like isoform X2 [Vollenhovia emeryi]	54.554806288	-1.6674946609	0.4870882896	-3.4233930409	0.0006184458	0.0205176199
Contig101930	ref|XP_012533858.1| PREDICTED: cytochrome P450 6A1-like, partial [Monomorium pharaonis]	130.8596663587	-1.6764496465	0.4583782249	-3.6573500996	0.0002548362	0.00980866
Contig4357	ref|XP_011866577.1| PREDICTED: uncharacterized peptidase C1-like protein F26E4.3 isoform X1 [Vollenhovia emeryi]	586.9162426424	-1.6853261032	0.5312437397	-3.1724159312	0.0015117632	0.0434842228
Contig38960	#N/A	25.8651680875	-1.6853468835	0.3773046132	-4.4668069891	7.93957003090297E-06	0.0007574864
Contig27197	ref|XP_011158786.1| PREDICTED: uncharacterized protein LOC105195192 [Solenopsis invicta]	18.2554220093	-1.6872692017	0.4626792447	-3.6467363108	0.0002655922	0.0101590105
Contig7352	ref|XP_011638378.1| PREDICTED: uncharacterized protein LOC105428031 [Pogonomyrmex barbatus]	36.732883699	-1.6882815679	0.5060491724	-3.3362006303	0.0008493185	0.0268175011
Contig77999	ref|XP_012527461.1| PREDICTED: insulin-like growth factor-binding protein complex acid labile subunit isoform X1 [Monomorium pharaonis]	224.5797482216	-1.6929607266	0.4461226767	-3.7948322628	0.0001477433	0.0062167022
Contig93064	ref|XP_012523880.1| PREDICTED: succinyl-CoA ligase [ADP-forming] subunit beta, mitochondrial-like [Monomorium pharaonis]	71.2170692238	-1.6930625776	0.5225184382	-3.2401968118	0.0011944722	0.0356743486
Contig145491	ref|XP_011872867.1| PREDICTED: G protein-coupled receptor kinase 1 [Vollenhovia emeryi]	517.2973393593	-1.6943467936	0.4898381779	-3.4589929288	0.0005421991	0.0184427327
Contig4932	ref|XP_011702286.1| PREDICTED: asparagine--tRNA ligase, cytoplasmic [Wasmannia auropunctata]	775.1511700313	-1.6954142434	0.4362188527	-3.8866138704	0.0001016523	0.0045438654
Contig36952	ref|XP_011872867.1| PREDICTED: G protein-coupled receptor kinase 1 [Vollenhovia emeryi]	161.3104504863	-1.6970528619	0.5022237814	-3.3790770665	0.0007272962	0.0234729938
Contig107977	ref|XP_015512027.1| PREDICTED: C-Maf-inducing protein-like [Neodiprion lecontei]	250.4688909591	-1.6994539013	0.5365649706	-3.1672844755	0.0015386972	0.0440732405
Contig50892	ref|XP_014482043.1| PREDICTED: probable methylthioribulose-1-phosphate dehydratase [Dinoponera quadriceps]	19.1545558002	-1.7004903681	0.5125300805	-3.3178352508	0.0009071798	0.0283274647
Contig24532	ref|XP_011069073.1| PREDICTED: uncharacterized protein LOC105154953 [Acromyrmex echinatior]	1003.7283461436	-1.7103827842	0.4680227695	-3.6544862681	0.0002576975	0.0098972213
Contig21466	#N/A	197.515982756	-1.7167073017	0.4114885017	-4.171944768	3.02010853098884E-05	0.001831469
Contig28395	#N/A	20260.8690860959	-1.7184018614	0.4800900422	-3.5793324383	0.000344473	0.0126686639
Contig63785	ref|XP_011691455.1| PREDICTED: lipid storage droplets surface-binding protein 2-like isoform X2 [Wasmannia auropunctata]	23.647445415	-1.7231497322	0.4424298602	-3.8947410365	9.83036964572528E-05	0.0044320413
Contig78881	#N/A	25.55258443	-1.7342371753	0.4674849824	-3.7097174042	0.0002074907	0.0082655247
Contig3910	ref|XP_011881792.1| PREDICTED: golgin subfamily A member 6-like protein 1 [Vollenhovia emeryi]	24.1869475177	-1.7389245529	0.4402465898	-3.9498876154	7.8187896364433E-05	0.0037071046
Contig15960	ref|XP_011882400.1| PREDICTED: metal transporter CNNM4 [Vollenhovia emeryi]	28.807718245	-1.7474863322	0.4854516544	-3.5997123844	0.0003185693	0.0118447295
Contig20415	ref|XP_012063134.1| PREDICTED: zinc finger and SCAN domain-containing protein 31-like [Atta cephalotes]	484.2782993247	-1.7548941916	0.5276130126	-3.3261010433	0.0008807	0.0276288327
Contig70239	ref|XP_011878217.1| PREDICTED: choline-phosphate cytidylyltransferase A-like isoform X1 [Vollenhovia emeryi]	111.8385215871	-1.7577067203	0.4784827084	-3.6735010259	0.0002392497	0.0093076176
Contig7473	ref|XP_011704356.1| PREDICTED: alaserpin-like isoform X2 [Wasmannia auropunctata]	564.9233540881	-1.7612257242	0.4781631338	-3.683315588	0.0002302198	0.0090029984
Contig132704	#N/A	161.1063653782	-1.7619792901	0.4421004861	-3.985472411	0.000067346	0.0032983668
Contig3671	ref|XP_011068308.1| PREDICTED: uncharacterized protein LOC105154460 isoform X1 [Acromyrmex echinatior]	46.5198038995	-1.7657309142	0.5434795719	-3.2489370446	0.0011583711	0.0347799328
Contig37731	#N/A	37.5280447632	-1.7694196313	0.4760082423	-3.7172037666	0.00020144	0.0080517294
Contig37069	ref|XP_011690057.1| PREDICTED: 2-oxoglutarate dehydrogenase, mitochondrial isoform X6 [Wasmannia auropunctata]	176.1012411648	-1.7710352168	0.462965439	-3.8254156093	0.0001305517	0.0055797207
Contig6686	ref|XP_011698558.1| PREDICTED: uncharacterized protein LOC105456277 [Wasmannia auropunctata]	105.9402129589	-1.775620566	0.4457686582	-3.9832781722	6.79711164216968E-05	0.0033218935
Contig5109	ref|XP_011172819.1| PREDICTED: cytochrome P450 9e2-like [Solenopsis invicta]	58.4018459164	-1.7757512731	0.420686826	-4.2210764948	2.43138404513071E-05	0.0015612611
Contig93786	ref|XP_011691453.1| PREDICTED: lipid storage droplets surface-binding protein 2-like isoform X1 [Wasmannia auropunctata]	303.597187965	-1.7876396451	0.5253555687	-3.4027233201	0.0006671781	0.0218521693
Contig70653	ref|XP_011871465.1| PREDICTED: rhomboid-related protein 3 isoform X1 [Vollenhovia emeryi]	257.017665698	-1.8046799752	0.3888494308	-4.6410765515	0.000003466	0.0004207333
Contig2124	#N/A	252.8296587344	-1.8095920183	0.5405080844	-3.3479462572	0.000814128	0.0258444935
Contig73228	ref|XP_014219636.1| PREDICTED: uncharacterized protein LOC106647649 [Copidosoma floridanum]	125.6562037343	-1.8146455946	0.4859988441	-3.7338475523	0.0001885767	0.0076194786
Contig13788	ref|XP_011872867.1| PREDICTED: G protein-coupled receptor kinase 1 [Vollenhovia emeryi]	135.409041588	-1.8165312572	0.5304681009	-3.4243930108	0.0006161744	0.0204626095
Contig58145	#N/A	14.4237853957	-1.8184106537	0.4256647768	-4.2719312307	1.93787343942125E-05	0.0013369907
Contig70676	#N/A	13.9722845778	-1.8295750874	0.5600764009	-3.2666527003	0.001088271	0.032959161
Contig13385	ref|XP_011158173.1| PREDICTED: facilitated trehalose transporter Tret1 isoform X1 [Solenopsis invicta]	1743.4261683327	-1.8393612347	0.4415507367	-4.1656848958	3.10419217595203E-05	0.0018616852
Contig5381	ref|XP_011874491.1| PREDICTED: aspartate--tRNA ligase, cytoplasmic [Vollenhovia emeryi]	54.87981971	-1.8395328763	0.4993354978	-3.683961754	0.0002296367	0.0089855936
Contig132219	ref|XP_012232934.1| PREDICTED: protein groucho isoform X8 [Linepithema humile]	19.3960391217	-1.8411764313	0.5179670635	-3.5546206717	0.0003785248	0.0136788783
Contig43319	ref|XP_011644521.1| PREDICTED: lambda-crystallin homolog isoform X2 [Pogonomyrmex barbatus]	123.3803618108	-1.8458713907	0.4402494543	-4.1927851874	0.000027555	0.0017114038
Contig80751	#N/A	33.9799883102	-1.8531734981	0.4033297118	-4.5946862925	0.000004334	0.0004954549
Contig41427	ref|XP_011866767.1| PREDICTED: platelet-derived growth factor subunit A-like [Vollenhovia emeryi]	154.9798071582	-1.8621417229	0.5835084182	-3.1912851038	0.0014164143	0.0411913387
Contig112157	ref|XP_011879328.1| PREDICTED: phospholipase D3-like isoform X1 [Vollenhovia emeryi]	268.2667969829	-1.8643779604	0.4966515287	-3.7538955438	0.0001741074	0.0070977666
Contig60984	ref|XP_011861429.1| PREDICTED: serine protease inhibitor 3/4-like isoform X14 [Vollenhovia emeryi]	142.3093009596	-1.8718143796	0.5295437794	-3.53476795	0.0004081334	0.0145847307
Contig146836	ref|XP_011695561.1| PREDICTED: aquaporin AQPAn.G [Wasmannia auropunctata]	222.6664350015	-1.8725953392	0.4101957628	-4.5651259934	4.99194435947588E-06	0.000548055
Contig127786	#N/A	33.9475535918	-1.8845594202	0.4930170611	-3.8225034568	0.0001321036	0.0056375252
Contig7122	#N/A	1326.7626892408	-1.8880564593	0.5151324971	-3.665186083	0.0002471588	0.009570512
Contig526	#N/A	150.3542171111	-1.890410528	0.5525305316	-3.421368449	0.0006230686	0.0206515888
Contig90748	ref|XP_011876482.1| PREDICTED: sodium-dependent nutrient amino acid transporter 1-like isoform X1 [Vollenhovia emeryi]	37.2749179935	-1.8944123019	0.475832447	-3.9812591886	6.85511488734256E-05	0.0033400247
Contig119106	#N/A	12.3747645827	-1.8968191408	0.6050869725	-3.1347876044	0.0017197858	0.0482191952
Contig2112	#N/A	413.3492041782	-1.9142370051	0.5048771053	-3.7914910085	0.0001497456	0.0062710729
Contig10414	#N/A	54.8762216304	-1.9145400229	0.539102789	-3.551345053	0.0003832676	0.0138361166
Contig111369	ref|XP_011878519.1| PREDICTED: organic cation transporter protein-like [Vollenhovia emeryi]	333.4214187685	-1.9164951661	0.6136176906	-3.1232723492	0.0017885216	0.0498545557
Contig80840	#N/A	96.4829048321	-1.9165793547	0.5455114763	-3.513362116	0.000442474	0.0156076487
Contig143444	#N/A	12.6644562648	-1.919436105	0.5414494802	-3.5449957481	0.0003926194	0.0141232042
Contig52897	#N/A	7.7115013882	-1.935380242	0.4850877647	-3.9897527472	6.6142206443256E-05	0.0032439067
Contig50873	#N/A	40.3891032079	-1.9370193358	0.6017430148	-3.2190142438	0.001286321	0.03798794
Contig14483	ref|XP_011060247.1| PREDICTED: ATP-binding cassette sub-family G member 4 [Acromyrmex echinatior]	1529.3291923665	-1.937869332	0.5911248563	-3.2782741436	0.0010444391	0.0318807752
Contig49788	ref|XP_011056952.1| PREDICTED: uncharacterized protein LOC105147553 [Acromyrmex echinatior]	13.0213987744	-1.9383493853	0.6076087649	-3.190127426	0.0014221007	0.0413368792
Contig134161	ref|XP_012530396.1| PREDICTED: acetyl-CoA acetyltransferase, cytosolic [Monomorium pharaonis]	620.4852359884	-1.9408275275	0.5624985739	-3.4503687965	0.0005598212	0.0189240541
Contig126597	ref|XP_011058115.1| PREDICTED: uncharacterized protein LOC105148226 isoform X3 [Acromyrmex echinatior]	51.3099148432	-1.9445608878	0.3395464054	-5.7269370453	1.02260094743936E-08	3.98045305978898E-06
Contig10459	ref|XP_011707358.1| PREDICTED: keratin, type II cytoskeletal 1b-like isoform X2 [Wasmannia auropunctata]	57384.1530166028	-1.9491744717	0.5007920136	-3.8921836189	0.000099346	0.0044704755
Contig10894	ref|XP_011688157.1| PREDICTED: laccase-1-like isoform X1 [Wasmannia auropunctata]	458.661012136	-1.9577332923	0.5962898345	-3.2831907889	0.0010263918	0.0314317459
Contig23171	ref|XP_011867063.1| PREDICTED: uncharacterized protein LOC105561578 [Vollenhovia emeryi]	142.5901283408	-1.9577766838	0.6063411402	-3.2288369599	0.0012429473	0.0368727127
Contig36176	ref|XP_011639949.1| PREDICTED: LOW QUALITY PROTEIN: RING finger and SPRY domain-containing protein 1-like [Pogonomyrmex barbatus]	155.1019481392	-1.9608742429	0.5304488668	-3.6966319763	0.0002184787	0.0086181981
Contig112149	ref|XP_011061566.1| PREDICTED: antichymotrypsin-2-like isoform X15 [Acromyrmex echinatior]	4391.439577612	-1.9684295829	0.522222048	-3.7693345012	0.0001636834	0.0067448158
Contig16193	ref|XP_014468120.1| PREDICTED: proteoglycan 4-like isoform X2 [Dinoponera quadriceps]	16.5224611604	-1.9691679234	0.5165042181	-3.8124914655	0.000137573	0.0058444526
Contig15001	ref|XP_011871465.1| PREDICTED: rhomboid-related protein 3 isoform X1 [Vollenhovia emeryi]	49.5606936777	-1.9727824061	0.4878443466	-4.0438767401	5.2574566599722E-05	0.0027503253
Contig146834	ref|XP_012535962.1| PREDICTED: aquaporin AQPAn.G isoform X3 [Monomorium pharaonis]	107.1696017246	-1.9956436306	0.517136577	-3.8590262602	0.0001138397	0.0049569211
Contig109077	#N/A	11.0225284795	-1.997025892	0.6214550703	-3.2134678554	0.0013114248	0.0385989955
Contig8301	ref|XP_011696344.1| PREDICTED: uncharacterized protein LOC105455016 [Wasmannia auropunctata]	10369.3580053364	-10.0057358759	1.4402034619	-6.9474460663	3.71958190778941E-12	4.61022600723614E-09
Contig100350	#N/A	197.0850656559	-10.2410295508	1.7348653406	-5.9030688499	3.56801279775663E-09	1.6804983476154E-06
Contig126825	ref|XP_012526470.1| PREDICTED: uncharacterized protein LOC105831111 [Monomorium pharaonis]	1316.9946680568	-10.2487181404	1.7257374702	-5.9387469515	2.87208774156174E-09	1.4189418937743E-06
Contig139896	ref|XP_011174161.1| PREDICTED: hymenoptaecin-like, partial [Solenopsis invicta]	79.3454143919	-10.2891017924	1.7670684066	-5.8226958017	5.79058965986217E-09	2.509794316471E-06
Contig106230	ref|XP_009016464.1| hypothetical protein HELRODRAFT_92454, partial [Helobdella robusta]	13.523486559	-10.4749194997	2.880329506	-3.6367087439	0.0002761439	0.0105227348
Contig63658	ref|XP_011868564.1| PREDICTED: uncharacterized protein LOC105562381 [Vollenhovia emeryi]	40.6935467486	-10.501126779	3.055949259	-3.43628964	0.0005897401	0.0197414146
Contig97895	#N/A	5.3186477647	-10.7597538946	2.6882554788	-4.0025042186	6.26755499538322E-05	0.0031127828
Contig28642	#N/A	41.8541566422	-10.8210380513	2.6403488363	-4.0983365163	0.000041613	0.002311239
Contig61995	#N/A	10.6573886402	-10.8559940299	2.0976128655	-5.1754040074	2.27418333123759E-07	4.77466986855687E-05
Contig38749	ref|XP_012062793.1| PREDICTED: LOW QUALITY PROTEIN: transmembrane protein 8B-like [Atta cephalotes]	3.7783712869	-10.9231809294	3.1402050653	-3.4784928698	0.0005042419	0.0173550174
Contig21713	#N/A	13611.5059573645	-10.9832707333	2.6358639475	-4.1668579837	3.0882675663612E-05	0.0018544961
Contig143333	ref|XP_011693337.1| PREDICTED: conserved oligomeric Golgi complex subunit 7 [Wasmannia auropunctata]	4.7172308256	-12.8334175213	3.7264649218	-3.4438583995	0.000573476	0.0192929603
Contig40815	ref|XP_011647383.1| PREDICTED: cyclin-K [Pogonomyrmex barbatus]	0.729762613	-13.1110476414	4.1985124649	-3.122784022	0.0017914916	0.0499176468
Contig83372	ref|XP_011067467.1| PREDICTED: uncharacterized protein LOC105153975 isoform X1 [Acromyrmex echinatior]	0.6365371352	-13.121816602	4.1954735857	-3.1276127317	0.0017623222	0.049240823
Contig81224	#N/A	0.3041103925	-13.124351988	4.200003017	-3.1248434667	0.001778997	0.0496380211
Contig125901	ref|XP_011699345.1| PREDICTED: uncharacterized protein LOC105456759 [Wasmannia auropunctata]	0.3471382133	-13.1288783167	4.1987471916	-3.1268561115	0.0017668638	0.0493287003
Contig40518	#N/A	0.7387474652	-13.1341353482	4.19349714	-3.1320243963	0.0017360545	0.0485837376
Contig70171	ref|XP_011170193.1| PREDICTED: uncharacterized protein K02A2.6-like [Solenopsis invicta]	0.5842462519	-13.1348271093	4.1938636264	-3.1319156461	0.0017366977	0.0485921125
Contig38756	ref|XP_011863377.1| PREDICTED: espin [Vollenhovia emeryi]	1.2105946618	-13.1349300411	4.1951717621	-3.13096359	0.0017423376	0.048711333
Contig96525	#N/A	0.4853736881	-13.1460475028	4.1981937083	-3.1313580116	0.001739999	0.0486555793
Contig136681	#N/A	0.7743133259	-13.1474448205	4.1957669729	-3.1335021476	0.0017273365	0.0483812123
Contig123146	ref|XP_011698811.1| PREDICTED: dnaJ homolog dnj-5 [Wasmannia auropunctata]	0.4064461289	-13.1480630442	4.1959896177	-3.1334832166	0.001727448	0.0483812123
Contig87553	ref|XP_011873544.1| PREDICTED: hybrid signal transduction histidine kinase L isoform X1 [Vollenhovia emeryi]	3.6084601311	-13.1566274831	4.1902869066	-3.1397915647	0.0016906808	0.0475399254
Contig40703	#N/A	0.2813135112	-13.1695900595	4.1995879289	-3.1359243532	0.0017131339	0.048046978
Contig121206	ref|XP_012527420.1| PREDICTED: uncharacterized protein LOC105831671 [Monomorium pharaonis]	2.4026357404	-13.1714157579	4.1914361597	-3.1424588747	0.0016753525	0.0472311008
Contig93300	#N/A	0.8180810966	-13.1893380783	4.1993674934	-3.1407915833	0.0016849189	0.0474327696
Contig143750	ref|XP_012537579.1| PREDICTED: putative nuclease HARBI1, partial [Monomorium pharaonis]	0.6473917943	-13.1898112524	4.1983504962	-3.141665105	0.0016799006	0.0473404308
Contig116548	ref|XP_011066524.1| PREDICTED: uncharacterized protein LOC105153409 [Acromyrmex echinatior]	0.755803439	-13.1964424708	4.1946162342	-3.146042864	0.0016549575	0.046749406
Contig88886	#N/A	0.5251824189	-13.1966170809	4.198809102	-3.1429428584	0.0016725849	0.0471624876
Contig88678	ref|XP_013171214.1| PREDICTED: UPF0073 membrane protein Mb1114c-like [Papilio xuthus]	0.5989391524	-13.1980802867	4.1959239415	-3.145452699	0.0016583001	0.0468063977
Contig78268	#N/A	0.2350489212	-13.2023121132	4.2056256458	-3.1392028738	0.0016940812	0.0476165883
Contig102553	#N/A	0.567166802	-13.2286892472	4.1952805158	-3.15323116	0.0016147388	0.0458424262
Contig22741	ref|XP_011703814.1| PREDICTED: uncharacterized protein LOC105459462 [Wasmannia auropunctata]	0.3182327119	-13.2357741745	4.2059566696	-3.1469116813	0.0016500479	0.0466666982
Contig103822	ref|XP_011645733.1| PREDICTED: uncharacterized protein LOC105432571 [Pogonomyrmex barbatus]	0.4788077233	-13.2414642856	4.1936242778	-3.1575228033	0.0015911579	0.0453010365
Contig70276	#N/A	0.622804457	-13.2420987806	4.1990398037	-3.1536016326	0.0016126906	0.0457934783
Contig136071	#N/A	0.2448753396	-13.277799015	4.1995839557	-3.1616939095	0.0015685435	0.0447557523
Contig70585	#N/A	0.2524214116	-13.3000510083	4.2059566696	-3.1621940151	0.001565852	0.0446970082
Contig66132	#N/A	0.2297310315	-13.3015954791	4.2000033088	-3.1670440476	0.0015399699	0.0440912288
Contig92547	#N/A	0.190708308	-13.3076941828	4.2020885379	-3.1669237958	0.0015406068	0.0440921864
Contig88036	#N/A	0.6902639244	-13.3077446408	4.1932791382	-3.1735890223	0.0015056672	0.0433645045
Contig44043	ref|XP_011879917.1| PREDICTED: autophagy protein 5 [Vollenhovia emeryi]	1.1931111716	-13.3080380526	4.1990562246	-3.1692926555	0.0015281044	0.0438450689
Contig37548	#N/A	0.3719896449	-13.3268258861	4.2012204428	-3.1721320192	0.001513242	0.0435028592
Contig148964	ref|XP_011868733.1| PREDICTED: gamma-aminobutyric acid type B receptor subunit 1 isoform X2 [Vollenhovia emeryi]	1.0343294542	-13.3298621182	4.1923323222	-3.1795814582	0.0014748791	0.0426603872
Contig71469	#N/A	0.4348579975	-13.3304577162	4.1965000487	-3.176565605	0.0014903008	0.0430008227
Contig135465	#N/A	0.2353951293	-13.3341968521	4.2033009318	-3.1723155368	0.001512286	0.0434842228
Contig149948	#N/A	0.2558332837	-13.3387703376	4.2040752689	-3.1728191063	0.0015096655	0.0434530886
Contig85992	#N/A	0.7788963107	-13.3409385779	4.2034715804	-3.1737905973	0.001504622	0.0433432363
Contig82258	ref|XP_011882433.1| PREDICTED: uncharacterized protein LOC105570082, partial [Vollenhovia emeryi]	0.3021718054	-13.3574190961	4.1963486165	-3.1831051986	0.0014570467	0.0421964177
Contig62462	#N/A	0.2754248319	-13.3578397503	4.2019792791	-3.1789399383	0.0014781472	0.0427286743
Contig19916	ref|XP_017022416.1| PREDICTED: ribose operon repressor-like [Drosophila kikkawai]	0.7227300858	-13.3582640205	4.1995218288	-3.180901199	0.0014681769	0.0424864822
Contig94123	ref|XP_011881004.1| PREDICTED: pyridoxal-dependent decarboxylase domain-containing protein 1 [Vollenhovia emeryi]	0.6032654757	-13.3735167311	4.2010491623	-3.1833754413	0.0014556873	0.0421656923
Contig41347	ref|NP_001171838.1| methylmalonyl-CoA mutase, mitochondrial [Saccoglossus kowalevskii]	0.2410397915	-13.3737853612	4.1938571335	-3.1888986524	0.0014281594	0.0414788564
Contig55488	#N/A	0.2410397915	-13.3737853612	4.1938571335	-3.1888986524	0.0014281594	0.0414788564
Contig33209	#N/A	2.5191113563	-13.3818237452	4.1676136003	-3.2109079748	0.001323163	0.0388768897
Contig72358	ref|XP_013295799.1| translation elongation factor EF-1, subunit alpha [Necator americanus]	1.3657337677	-13.3843627219	4.1996611073	-3.1870101848	0.0014375171	0.0417163396
Contig85361	ref|XP_012219927.1| PREDICTED: probable ATP-dependent RNA helicase DHX35 [Linepithema humile]	0.3109014126	-13.3935056273	4.1994517261	-3.189346253	0.0014259497	0.0414317112
Contig110230	ref|XP_012539052.1| PREDICTED: glutamate receptor ionotropic, kainate 2 isoform X3 [Monomorium pharaonis]	0.6385776667	-13.3991274949	4.2059566696	-3.185750246	0.0014437918	0.0418726288
Contig122797	ref|XP_012056871.1| PREDICTED: F-box/LRR-repeat protein 4-like [Atta cephalotes]	0.5132830377	-13.4045475992	4.1988443437	-3.1924373713	0.0014107753	0.0410583572
Contig37964	#N/A	0.4790475742	-13.4374605323	4.1930151149	-3.2047250402	0.0013519156	0.0395981798
Contig60398	#N/A	0.3650986136	-13.4394685606	4.2028040624	-3.1977385481	0.001385098	0.0404025989
Contig54367	ref|XP_012349699.1| PREDICTED: uncharacterized glycosyl hydrolase C11E10.09c-like, partial [Apis florea]	0.5595196438	-13.4439182139	4.2018588676	-3.1995168418	0.0013765814	0.0401873611
Contig88274	ref|XP_009064700.1| hypothetical protein LOTGIDRAFT_148309 [Lottia gigantea]	26.541880581	-13.4481254034	4.1926132495	-3.2075759445	0.0013385871	0.0392810687
Contig56366	#N/A	1.1671289382	-13.4481614286	4.2021056982	-3.200338686	0.0013726618	0.0400977878
Contig64504	ref|XP_011869290.1| PREDICTED: tyrosine-protein phosphatase 10D isoform X1 [Vollenhovia emeryi]	1.1921868642	-13.4551205718	4.1933283207	-3.2086971357	0.0013333787	0.0391444846
Contig101515	ref|XP_012523194.1| PREDICTED: uncharacterized protein LOC105829089 isoform X1 [Monomorium pharaonis]	3.5356283891	-13.4682729801	4.1903681797	-3.2141025329	0.0013085294	0.0385350721
Contig48948	#N/A	0.515923357	-13.473303881	4.2008336036	-3.2072929215	0.0013399049	0.039295255
Contig80288	#N/A	0.4696262207	-13.4733044323	4.1916094948	-3.2143510623	0.0013073972	0.0385097566
Contig91992	ref|XP_011874257.1| PREDICTED: uncharacterized protein LOC105565563 [Vollenhovia emeryi]	0.7119773423	-13.4764842083	4.1919037151	-3.214884006	0.0013049724	0.038462388
Contig116476	ref|XP_015586703.1| PREDICTED: PCTP-like protein [Cephus cinctus]	0.7168882902	-13.4946754703	4.2004141383	-3.2127011828	0.0013149302	0.0386752064
Contig81194	#N/A	0.6732400925	-13.5037108105	4.2003571487	-3.2148958606	0.0013049185	0.038462388
Contig91996	ref|XP_012150756.1| PREDICTED: longitudinals lacking protein, isoforms A/B/D/L-like isoform X29 [Megachile rotundata]	0.2311411112	-13.516833381	4.2006973194	-3.2177594226	0.0012919613	0.0381345854
Contig32216	#N/A	0.4470331864	-13.5194378579	4.1993422111	-3.2194179894	0.001284511	0.0379622562
Contig46204	#N/A	0.2538760603	-13.521277924	4.202027558	-3.2177984883	0.0012917854	0.0381345854
Contig6658	#N/A	0.6449682933	-13.5238299098	4.1955322443	-3.2233883861	0.0012668366	0.0374948069
Contig91025	#N/A	0.4714517217	-13.5358759243	4.1995914428	-3.2231411338	0.0012679306	0.0375167529
Contig135269	#N/A	0.1680401467	-13.5453496799	4.1971508479	-3.2272725405	0.0012497636	0.0370438112
Contig37938	#N/A	0.5842644455	-13.5474517538	4.1983285901	-3.2268678983	0.0012515323	0.0370806781
Contig12691	ref|XP_011159235.1| PREDICTED: protein Smaug homolog 1 [Solenopsis invicta]	2.982561946	-13.5505702308	4.198118468	-3.2277722351	0.0012475827	0.0370024534
Contig74029	ref|XP_012542435.1| PREDICTED: tyrosine-protein phosphatase Lar isoform X10 [Monomorium pharaonis]	0.8296731971	-13.5580279402	4.1935245302	-3.233086594	0.0012246044	0.0363858995
Contig45691	#N/A	0.3863830853	-13.5593012073	4.2010326121	-3.2276115087	0.0012482838	0.0370077115
Contig77370	#N/A	2.8256869944	-13.5669117304	4.1935396977	-3.235193347	0.0012156038	0.0361602475
Contig35957	#N/A	0.4259366126	-13.5758652735	4.1993938124	-3.2328154681	0.0012257671	0.036401265
Contig134630	ref|XP_011704506.1| PREDICTED: uncharacterized protein LOC105459867 [Wasmannia auropunctata]	17.8200478869	-13.5791924916	4.1979276395	-3.2347371508	0.0012175476	0.0362028252
Contig137617	ref|XP_011696486.1| PREDICTED: solute carrier family 41 member 1-like [Wasmannia auropunctata]	2.1255363032	-13.5809877767	4.1911943037	-3.2403622435	0.0011937794	0.0356611936
Contig25818	ref|XP_012540473.1| PREDICTED: putative nuclease HARBI1 [Monomorium pharaonis]	0.164134456	-13.5867755635	4.1953808176	-3.2385082914	0.0012015653	0.035802946
Contig45734	#N/A	0.164134456	-13.5867755635	4.1953808176	-3.2385082914	0.0012015653	0.035802946
Contig67822	#N/A	0.164134456	-13.5867755635	4.1953808176	-3.2385082914	0.0012015653	0.035802946
Contig84922	#N/A	0.164134456	-13.5867755635	4.1953808176	-3.2385082914	0.0012015653	0.035802946
Contig45026	#N/A	0.3364178172	-13.5972283749	4.1951875321	-3.2411491193	0.0011904889	0.0355704191
Contig140978	#N/A	0.2821557477	-13.5995795482	4.1993069291	-3.2385295425	0.0012014758	0.035802946
Contig60006	ref|XP_011689445.1| PREDICTED: LOW QUALITY PROTEIN: la-related protein 7 [Wasmannia auropunctata]	0.3828273191	-13.6248499353	4.2020600945	-3.2424214859	0.001185186	0.035436871
Contig112992	ref|XP_011864369.1| PREDICTED: valine--tRNA ligase, mitochondrial-like isoform X1 [Vollenhovia emeryi]	1.2362778157	-13.6301192561	4.1985786057	-3.2463651479	0.0011688881	0.0350287131
Contig56275	#N/A	0.8812839984	-13.6445857528	4.1922895701	-3.2546859001	0.0011351784	0.0341852729
Contig87368	ref|XP_011882673.1| PREDICTED: protein maelstrom 2-like [Vollenhovia emeryi]	1.8352103718	-13.6527586058	4.1880136095	-3.2599604201	0.0011142776	0.0336131694
Contig135192	ref|XP_011699132.1| PREDICTED: uncharacterized protein LOC105456632 [Wasmannia auropunctata]	0.476728331	-13.6558109991	4.1984983306	-3.2525464878	0.0011437588	0.0343923588
Contig34923	#N/A	0.5422022996	-13.6580911411	4.1999473307	-3.2519672428	0.0011460923	0.0344405366
Contig80639	#N/A	0.4283774455	-13.6609588136	4.1997214329	-3.2528249865	0.0011426385	0.0343677552
Contig120340	#N/A	0.3421319146	-13.6615585814	4.1996373038	-3.2530329629	0.0011418025	0.0343554662
Contig82147	#N/A	0.6435841116	-13.6887402535	4.2040410743	-3.2560909876	0.0011295755	0.0340237956
Contig78481	#N/A	0.2269284065	-13.6922818984	4.1995847555	-3.260389466	0.0011125932	0.0335910441
Contig65430	ref|XP_012349669.1| PREDICTED: cyanelle 30S ribosomal protein S4-like, partial [Apis florea]	0.691020527	-13.6969689772	4.19061386	-3.2684874901	0.0010812396	0.0327986062
Contig33503	ref|XP_011876720.1| PREDICTED: cytoplasmic dynein 2 heavy chain 1 [Vollenhovia emeryi]	1.0022715882	-13.706670958	4.1931641019	-3.2688133889	0.001079995	0.0327678891
Contig52298	#N/A	0.2969597713	-13.7104889848	4.19514352	-3.2681811527	0.0010824106	0.0328129955
Contig110595	ref|XP_012224668.1| PREDICTED: maltase 1-like [Linepithema humile]	325.0388115448	-13.7105425121	3.394523398	-4.0390184142	5.36753516938398E-05	0.002789954
Contig121945	#N/A	0.3734470173	-13.7120993961	4.1992934248	-3.2653349049	0.0010933472	0.0330639278
Contig53504	ref|XP_011155399.1| PREDICTED: proton-coupled amino acid transporter 1-like [Solenopsis invicta]	0.2069230704	-13.7143812007	4.193812169	-3.2701467419	0.0010749171	0.0326348426
Contig91170	#N/A	0.2069230704	-13.7143812007	4.193812169	-3.2701467419	0.0010749171	0.0326348426
Contig60639	#N/A	0.2109048398	-13.7325422175	4.1945910497	-3.273869146	0.0010608572	0.0322773357
Contig79353	#N/A	0.2109048398	-13.7325422175	4.1945910497	-3.273869146	0.0010608572	0.0322773357
Contig96919	ref|XP_015584961.1| PREDICTED: metastasis-associated protein MTA3 isoform X3 [Cephus cinctus]	0.4965886049	-13.7458895456	4.1921508191	-3.2789587347	0.0010419087	0.0318219959
Contig31480	#N/A	0.397970783	-13.7620790388	4.2017032261	-3.2753572297	0.0010552844	0.0321354566
Contig91081	ref|XP_013078548.1| PREDICTED: phoH-like protein [Biomphalaria glabrata]	0.9534029806	-13.7660452376	4.2000066855	-3.2776246012	0.0010468452	0.0319266309
Contig81215	#N/A	0.5061663086	-13.7694637269	4.1969064827	-3.2808602678	0.00103491	0.0316582984
Contig71137	#N/A	0.6928421891	-13.7726967875	4.2013416653	-3.2781663299	0.0010448381	0.0318860666
Contig68198	ref|XP_011871954.1| PREDICTED: probable 2-oxoglutarate dehydrogenase E1 component DHKTD1 homolog, mitochondrial [Vollenhovia emeryi]	1.6804753679	-13.7732768713	4.1915840366	-3.2859359973	0.001016441	0.0311743146
Contig33451	#N/A	0.2768073563	-13.7824757913	4.1937929883	-3.286398692	0.0010147727	0.0311299037
Contig135660	ref|XP_011861392.1| PREDICTED: uncharacterized protein LOC105558377, partial [Vollenhovia emeryi]	0.7215492144	-13.7916425581	4.1986259618	-3.2847990471	0.0010205513	0.0312856377
Contig64299	#N/A	0.5053646814	-13.8124547264	4.1951288906	-3.2924982966	0.000993015	0.0305886286
Contig132894	#N/A	0.4197793415	-13.8171597099	4.2011010716	-3.2889377033	0.0010056628	0.0308973987
Contig109971	#N/A	1.0454018632	-13.8192119722	4.1997027073	-3.290521481	0.0010000187	0.0307536416
Contig78223	#N/A	0.406434522	-13.8222928747	4.1985812922	-3.292134155	0.0009943017	0.0306035661
Contig95792	#N/A	0.1686938173	-13.8227875189	4.195709674	-3.2945052429	0.0009859511	0.0304240939
Contig92022	ref|XP_011689403.1| PREDICTED: ecto-NOX disulfide-thiol exchanger 2 [Wasmannia auropunctata]	5.1564275744	-13.8368432957	4.1851627805	-3.3061660971	0.00094582	0.0293137822
Contig24069	ref|XP_012533990.1| PREDICTED: epididymal secretory protein E1 [Monomorium pharaonis]	146.5520316549	-13.8439739397	4.1614721001	-3.3267011305	0.0008788057	0.0275816556
Contig81510	#N/A	0.2825339932	-13.8447525773	4.2054268589	-3.2921158878	0.0009943663	0.0306035661
Contig143296	#N/A	0.6344182834	-13.8547030892	4.1912367819	-3.3056359757	0.0009476111	0.0293531611
Contig59012	ref|XP_011647720.1| PREDICTED: uridine-cytidine kinase-like 1 isoform X2 [Pogonomyrmex barbatus]	0.4109331512	-13.8709141766	4.2021061935	-3.3009432741	0.0009636036	0.0297735189
Contig14789	ref|XP_011697298.1| PREDICTED: inositol monophosphatase 2-like [Wasmannia auropunctata]	0.5877066552	-13.8746301114	4.1986730186	-3.3045274186	0.0009513667	0.0294469354
Contig36591	#N/A	0.1871100821	-13.8767368704	4.1946242831	-3.3082192668	0.0009389127	0.0291316519
Contig55087	ref|XP_011566844.1| PREDICTED: ATP-dependent DNA helicase srs2-like [Plutella xylostella]	0.7137261209	-13.8974783991	4.2013201245	-3.3078837097	0.0009400384	0.0291601756
Contig118418	ref|XP_011161835.1| PREDICTED: uncharacterized protein C05D11.1-like isoform X2 [Solenopsis invicta]	1.7258339745	-13.9054927366	4.1919098625	-3.3172213127	0.0009091757	0.0283772467
Contig123331	ref|XP_011159479.1| PREDICTED: D-beta-hydroxybutyrate dehydrogenase, mitochondrial [Solenopsis invicta]	0.4104698533	-13.9184451051	4.2017021812	-3.3125729775	0.0009244201	0.02874511
Contig120359	ref|XP_011703476.1| PREDICTED: nephrin-like isoform X4 [Wasmannia auropunctata]	0.1910106652	-13.918624586	4.1966431586	-3.3166090277	0.0009111703	0.0284143956
Contig125976	#N/A	0.1910106652	-13.918624586	4.1966431586	-3.3166090277	0.0009111703	0.0284143956
Contig147434	#N/A	0.1910106652	-13.918624586	4.1966431586	-3.3166090277	0.0009111703	0.0284143956
Contig100564	#N/A	0.2944867928	-13.9195958977	4.2040783861	-3.3109743966	0.0009297171	0.0288717019
Contig7095	ref|XP_012249045.1| PREDICTED: 3,4-dihydroxy-2-butanone 4-phosphate synthase-like [Bombus impatiens]	0.9573929078	-13.9260778743	4.2000045463	-3.3157292381	0.0009140434	0.0284870319
Contig86926	#N/A	0.4831068255	-13.9304106031	4.1932819848	-3.3220781845	0.0008934965	0.0279434219
Contig46604	#N/A	0.4460391292	-13.9338525908	4.1933158866	-3.3228721536	0.0008909574	0.0278763518
Contig27241	#N/A	0.5732011733	-13.9549388563	4.1994589203	-3.3230325909	0.0008904451	0.0278726677
Contig128500	#N/A	0.5626837293	-13.9555577036	4.1993025538	-3.3233036974	0.0008895801	0.027851761
Contig111213	ref|XP_011864963.1| PREDICTED: probable ATP-dependent RNA helicase Dbp73D [Vollenhovia emeryi]	0.4499359856	-13.9710273173	4.193509819	-3.3315833086	0.0008635345	0.0271807252
Contig94440	#N/A	0.141043781	-13.9740558544	4.1965896111	-3.3298599933	0.0008688966	0.0273192003
Contig104395	#N/A	0.3457375483	-13.9849368031	4.2036667114	-3.3268424362	0.0008783602	0.0275737984
Contig56494	ref|XP_011866053.1| PREDICTED: forkhead box protein P1 isoform X1 [Vollenhovia emeryi]	0.4303398012	-13.9907687934	4.194085177	-3.3358332516	0.0008504416	0.0268350523
Contig32875	ref|XP_011169185.1| PREDICTED: protein lifeguard 1-like [Solenopsis invicta]	0.4848335709	-14.0038061542	4.1984151926	-3.3354981611	0.0008514672	0.0268548564
Contig32609	ref|XP_011158659.1| PREDICTED: mucosa-associated lymphoid tissue lymphoma translocation protein 1-like isoform X2 [Solenopsis invicta]	0.3923266851	-14.0089003165	4.1984618491	-3.3366744346	0.000847872	0.0267833167
Contig43112	ref|XP_012058171.1| PREDICTED: GATA zinc finger domain-containing protein 14 [Atta cephalotes]	0.1421293911	-14.0139741357	4.1961397948	-3.3397300426	0.0008385986	0.0265200253
Contig124393	#N/A	0.214413419	-14.018693397	4.1946010371	-3.3420802772	0.0008315301	0.0263082637
Contig63917	#N/A	0.5934622457	-14.0202232535	4.2041905176	-3.3348211017	0.0008535429	0.0269023096
Contig105982	#N/A	0.2036002787	-14.0316329385	4.2059566696	-3.3361334984	0.0008495236	0.0268175011
Contig3469	ref|XP_011684535.1| PREDICTED: fidgetin-like protein 1 isoform X1 [Wasmannia auropunctata]	4.6949030426	-14.0355951092	4.1682427875	-3.3672690927	0.0007591657	0.0244012372
Contig90782	ref|XP_011861809.1| PREDICTED: enolase-like [Vollenhovia emeryi]	0.2269980027	-14.0430618678	4.2059566696	-3.3388508182	0.0008412573	0.0265921996
Contig104323	#N/A	0.2297934863	-14.0436556833	4.1946753501	-3.3479720148	0.0008140523	0.0258444935
Contig12929	#N/A	0.1336339489	-14.0515826647	4.1969585082	-3.3480394522	0.0008138542	0.0258444935
Contig86256	#N/A	0.1336339489	-14.0515826647	4.1969585082	-3.3480394522	0.0008138542	0.0258444935
Contig74436	ref|XP_015524075.1| PREDICTED: uncharacterized protein K02A2.6-like [Neodiprion lecontei]	0.2391331686	-14.0546580964	4.2037595633	-3.3433544152	0.0008277211	0.0262053578
Contig52428	ref|XP_012217149.1| PREDICTED: uncharacterized protein LOC105668987 [Linepithema humile]	0.2729576385	-14.0556550087	4.1957809576	-3.3499496639	0.0008082625	0.0257276554
Contig98496	#N/A	0.9017363701	-14.0597740914	4.1927131631	-3.3533832496	0.0007983008	0.0254564466
Contig58040	#N/A	0.1550222462	-14.0635052983	4.1957878576	-3.3518151479	0.0008028361	0.025583745
Contig74454	#N/A	0.2453342783	-14.0778141174	4.1945371052	-3.3562259111	0.00079014	0.0252189762
Contig76938	#N/A	0.21835957	-14.0976725055	4.1946830311	-3.3608433345	0.0007770489	0.0248629245
Contig84744	ref|XP_011052524.1| PREDICTED: activating signal cointegrator 1 complex subunit 1 isoform X1 [Acromyrmex echinatior]	1.0931952808	-14.1019481514	4.1990346494	-3.3583786105	0.0007840115	0.0250460026
Contig19398	#N/A	0.331176974	-14.1094481373	4.1961456517	-3.3624781665	0.0007724623	0.0247385793
Contig27072	ref|XP_012535107.1| PREDICTED: cilia- and flagella-associated protein 70 [Monomorium pharaonis]	0.3228008692	-14.1116452398	4.1941320573	-3.3646163371	0.0007665016	0.0245866924
Contig40306	ref|XP_011860484.1| PREDICTED: lipoyl synthase, organellar chromatophore-like [Vollenhovia emeryi]	1.1233619957	-14.1119853137	4.1983512362	-3.361316031	0.0007757201	0.0248260311
Contig65220	ref|XP_011566844.1| PREDICTED: ATP-dependent DNA helicase srs2-like [Plutella xylostella]	0.7680181996	-14.1144533756	4.1913836873	-3.3674925582	0.0007585507	0.0243925679
Contig29711	ref|XP_012530428.1| PREDICTED: THAP domain-containing protein 2-like [Monomorium pharaonis]	1.2107186524	-14.1311767459	4.1885402683	-3.3737712522	0.0007414595	0.023886459
Contig55640	ref|XP_001651061.1| AAEL015233-PA [Aedes aegypti]	0.3070743596	-14.133247944	4.1955337402	-3.3686412312	0.0007553969	0.0243132823
Contig59103	ref|XP_011703695.1| PREDICTED: paired amphipathic helix protein Sin3b isoform X1 [Wasmannia auropunctata]	80.7153366262	-14.1399858671	4.1816911621	-3.3814036759	0.0007211651	0.0233017307
Contig143947	#N/A	0.3482172677	-14.142724555	4.1996454468	-3.3675996543	0.0007582562	0.024388646
Contig149567	ref|XP_011685987.1| PREDICTED: conserved oligomeric Golgi complex subunit 5-like [Wasmannia auropunctata]	3.8777296487	-14.145025501	3.4977887381	-4.0439908068	0.000052549	0.0027503253
Contig140133	ref|XP_011172194.1| PREDICTED: cholesterol desaturase daf-36 [Solenopsis invicta]	2.765273196	-14.146443333	4.2004252773	-3.3678597759	0.0007575411	0.0243754524
Contig71908	ref|XP_011054675.1| PREDICTED: inositol-phosphate phosphatase-like [Acromyrmex echinatior]	1.0398250798	-14.1492980464	4.1922970022	-3.3750705255	0.0007379678	0.0237848155
Contig94271	ref|XP_012062045.1| PREDICTED: odorant receptor 43a-like [Atta cephalotes]	0.8955691226	-14.1614393105	4.189956737	-3.3798533492	0.0007252452	0.0234121465
Contig100756	#N/A	0.8796969673	-14.1639965891	4.1854707619	-3.3840868554	0.0007141541	0.0231227838
Contig144336	ref|XP_011858793.1| PREDICTED: uncharacterized protein LOC105556322 [Vollenhovia emeryi]	0.3640759185	-14.2037073176	4.1957274398	-3.3852788393	0.0007110598	0.0230437204
Contig61364	#N/A	0.3169348833	-14.2039115439	4.1985232104	-3.3830732456	0.0007167951	0.0231923519
Contig13498	#N/A	0.7897370838	-14.2116731429	4.2009402842	-3.3829743299	0.0007170533	0.0231953952
Contig85366	#N/A	0.377506676	-14.2142334976	4.1932017478	-3.3898281916	0.0006993644	0.0227168026
Contig92420	ref|XP_012249056.1| PREDICTED: uncharacterized protein LOC105681983 [Bombus impatiens]	0.377506676	-14.2142334976	4.1932017478	-3.3898281916	0.0006993644	0.0227168026
Contig128401	#N/A	0.3435330715	-14.2169053592	4.1947051929	-3.3892501869	0.0007008403	0.0227595125
Contig119847	#N/A	0.6516296846	-14.2326129317	4.1958213718	-3.3920921961	0.000693611	0.022561038
Contig80029	ref|XP_003493008.1| PREDICTED: putative GTPase Obg [Bombus impatiens]	0.5401167872	-14.2459669146	4.1924687852	-3.3979899778	0.0006788291	0.0221567362
Contig120499	ref|XP_011871062.1| PREDICTED: RB1-inducible coiled-coil protein 1 isoform X3 [Vollenhovia emeryi]	0.364071852	-14.2583579833	4.193233256	-3.4003255037	0.0006730568	0.0219937339
Contig65854	ref|XP_011646262.1| PREDICTED: uncharacterized protein LOC105432942 [Pogonomyrmex barbatus]	0.3092732338	-14.2616849876	4.1935006542	-3.4009020538	0.0006716389	0.021962638
Contig76657	ref|XP_012542889.1| PREDICTED: NADH dehydrogenase [ubiquinone] flavoprotein 1, mitochondrial-like, partial [Monomorium pharaonis]	0.3092732338	-14.2616849876	4.1935006542	-3.4009020538	0.0006716389	0.021962638
Contig114606	ref|XP_011696169.1| PREDICTED: leukotriene A-4 hydrolase [Wasmannia auropunctata]	0.5833533436	-14.2711080107	4.1951114632	-3.401842391	0.0006693323	0.0219074916
Contig50539	#N/A	0.1706074751	-14.280098952	4.19644776	-3.402901637	0.0006667428	0.0218429763
Contig52528	#N/A	0.1706074751	-14.280098952	4.19644776	-3.402901637	0.0006667428	0.0218429763
Contig80072	#N/A	0.1706074751	-14.280098952	4.19644776	-3.402901637	0.0006667428	0.0218429763
Contig85184	#N/A	0.1706074751	-14.280098952	4.19644776	-3.402901637	0.0006667428	0.0218429763
Contig112650	ref|XP_011700974.1| PREDICTED: uncharacterized protein LOC105457798 isoform X2 [Wasmannia auropunctata]	0.567552508	-14.2877428751	4.1935345386	-3.4070883985	0.0006565986	0.0215907399
Contig52732	#N/A	0.2047241963	-14.2906386976	4.1960775989	-3.4057136363	0.0006599136	0.0216896513
Contig76609	ref|XP_015119273.1| PREDICTED: sodium- and chloride-dependent glycine transporter 1-like [Diachasma alloeum]	0.2047241963	-14.2906386976	4.1960775989	-3.4057136363	0.0006599136	0.0216896513
Contig55553	#N/A	0.1575996352	-14.2910446157	4.1970590591	-3.405013943	0.0006616068	0.0217176725
Contig62750	#N/A	0.1575996352	-14.2910446157	4.1970590591	-3.405013943	0.0006616068	0.0217176725
Contig72214	ref|XP_008212069.1| PREDICTED: uncharacterized protein LOC100680303 [Nasonia vitripennis]	0.1575996352	-14.2910446157	4.1970590591	-3.405013943	0.0006616068	0.0217176725
Contig98165	#N/A	0.45540738	-14.3061135225	4.1957165945	-3.4096949116	0.0006503559	0.021410376
Contig91781	#N/A	1.6214881694	-14.3083306071	4.1834745609	-3.4202026088	0.0006257451	0.0207208597
Contig64284	#N/A	0.2645077845	-14.3143090818	4.1939102779	-3.4131176237	0.0006422422	0.0211876932
Contig5286	ref|XP_012060796.1| PREDICTED: lysM and putative peptidoglycan-binding domain-containing protein 2 [Atta cephalotes]	1.6160644422	-14.3144180473	4.1843365203	-3.4209528745	0.0006240214	0.0206686258
Contig65703	ref|XP_003731900.2| PREDICTED: histidine ammonia-lyase, partial [Strongylocentrotus purpuratus]	0.9616760173	-14.3146348479	4.1842273887	-3.4210939125	0.0006236979	0.0206627535
Contig85828	ref|XP_009064700.1| hypothetical protein LOTGIDRAFT_148309 [Lottia gigantea]	0.8967427599	-14.3162206149	4.1961211782	-3.4117748289	0.000645414	0.0212675062
Contig32962	#N/A	0.4207386184	-14.3365610972	4.1906177443	-3.4211092426	0.0006236628	0.0206627535
Contig132141	#N/A	0.3779377036	-14.3374764285	4.2020488825	-3.4120203809	0.0006448329	0.0212582727
Contig96279	#N/A	0.9203149945	-14.3495608064	4.1855332548	-3.4283709943	0.000607215	0.0202067038
Contig131537	#N/A	0.2071649158	-14.3666036038	4.2031064992	-3.4180917392	0.0006306185	0.0208480343
Contig25165	ref|XP_011879656.1| PREDICTED: uncharacterized protein LOC105568530 [Vollenhovia emeryi]	0.9865121353	-14.3762288583	4.1875060447	-3.4331243239	0.0005966684	0.019944987
Contig34586	#N/A	0.4115175306	-14.3839233811	4.1940655197	-3.4295895745	0.0006044949	0.0201351512
Contig65817	ref|XP_013294314.1| ABC transporter, ATP-binding protein [Necator americanus]	0.2435466144	-14.3840312502	4.1939098312	-3.4297426099	0.0006041541	0.0201301347
Contig112740	ref|XP_013402251.1| PREDICTED: prostaglandin reductase 1-like [Lingula anatina]	0.4415746552	-14.3893273918	4.1960091268	-3.4292888688	0.0006051651	0.0201479755
Contig108741	ref|XP_015115107.1| PREDICTED: sterile alpha and TIR motif-containing protein 1 isoform X3 [Diachasma alloeum]	0.5688189806	-14.3906328535	4.1935689835	-3.4315955956	0.0006000416	0.0200198534
Contig97499	#N/A	0.9167679054	-14.3928072002	4.2010503623	-3.4260020611	0.0006125357	0.0203645792
Contig53292	ref|XP_011884095.1| PREDICTED: uncharacterized protein LOC105571237 [Vollenhovia emeryi]	3.594001554	-14.395942265	4.1905759193	-3.4353135565	0.0005918686	0.019807971
Contig75115	ref|XP_011877267.1| PREDICTED: inositol polyphosphate 5-phosphatase OCRL-1 [Vollenhovia emeryi]	1.852308348	-14.4012408956	4.1989538474	-3.4297211684	0.0006042018	0.0201301347
Contig18856	#N/A	0.399389574	-14.4015604607	4.1929663536	-3.434694974	0.0005932212	0.0198438373
Contig55457	#N/A	0.8838396477	-14.4022812707	4.1877768367	-3.4391233899	0.0005836012	0.0195823069
Contig100018	#N/A	0.2118409054	-14.4036001754	4.1971433328	-3.431762757	0.0005996719	0.0200122439
Contig100846	ref|XP_011876325.1| PREDICTED: probable cytochrome P450 12a5, mitochondrial [Vollenhovia emeryi]	0.2118409054	-14.4036001754	4.1971433328	-3.431762757	0.0005996719	0.0200122439
Contig137282	ref|XP_012542600.1| PREDICTED: transcription elongation factor B polypeptide 1 isoform X2 [Monomorium pharaonis]	0.2118409054	-14.4036001754	4.1971433328	-3.431762757	0.0005996719	0.0200122439
Contig85342	#N/A	0.3065035076	-14.4079274149	4.1959817246	-3.433744082	0.000595306	0.019908863
Contig60664	#N/A	0.1445067863	-14.4235236967	4.1966490654	-3.436914422	0.0005883815	0.0197006012
Contig71785	#N/A	0.1445067863	-14.4235236967	4.1966490654	-3.436914422	0.0005883815	0.0197006012
Contig77683	#N/A	0.1445067863	-14.4235236967	4.1966490654	-3.436914422	0.0005883815	0.0197006012
Contig86920	#N/A	0.1445067863	-14.4235236967	4.1966490654	-3.436914422	0.0005883815	0.0197006012
Contig47108	ref|XP_017117958.1| PREDICTED: UPF0053 protein sll0260-like [Drosophila elegans]	0.5082248798	-14.4309902405	4.1887600509	-3.4451699465	0.0005707005	0.0192224702
Contig70483	ref|XP_012248206.1| PREDICTED: LOW QUALITY PROTEIN: uncharacterized protein LOC100740922 [Bombus impatiens]	0.8768785451	-14.4559759589	4.189320917	-3.4506728526	0.000559191	0.0189114419
Contig41819	#N/A	0.1362791599	-14.460069026	4.1959873387	-3.4461660293	0.0005686009	0.0191700314
Contig45224	#N/A	0.1362791599	-14.460069026	4.1959873387	-3.4461660293	0.0005686009	0.0191700314
Contig54314	#N/A	0.8775458276	-14.4610669062	4.1969362625	-3.445624618	0.0005697412	0.0192038937
Contig95805	#N/A	0.2454771997	-14.4621711916	4.1962737427	-3.4464317818	0.000568042	0.0191603306
Contig67005	ref|XP_011049163.1| PREDICTED: helicase POLQ-like [Acromyrmex echinatior]	0.242107687	-14.4657667577	4.2000347373	-3.4442016942	0.0005727483	0.0192730679
Contig73334	#N/A	0.7262721666	-14.4807809497	4.1932610253	-3.453345943	0.0005536785	0.0187564384
Contig143409	ref|XP_011876261.1| PREDICTED: apoptotic protease-activating factor 1 isoform X4 [Vollenhovia emeryi]	0.7659624054	-14.4846927163	4.1981372968	-3.4502665568	0.0005600333	0.018926339
Contig87693	#N/A	0.3186962586	-14.5038659599	4.1946249121	-3.4577265581	0.000544754	0.0185207181
Contig20132	#N/A	0.2246323464	-14.5111176575	4.1899329431	-3.4633293311	0.0005335349	0.0181962072
Contig37214	ref|XP_013081452.1| PREDICTED: uncharacterized protein LOC106066894 [Biomphalaria glabrata]	0.3720783469	-14.525622526	4.1890628658	-3.467511229	0.0005253018	0.0179327296
Contig123416	ref|XP_011172203.1| PREDICTED: adenosine 3'-phospho 5'-phosphosulfate transporter 1-like [Solenopsis invicta]	0.6298830355	-14.5258111997	4.201134403	-3.4575925944	0.0005450249	0.0185254715
Contig49409	#N/A	0.5154449906	-14.5280738003	4.1853602947	-3.4711644345	0.0005182066	0.0177462514
Contig55731	#N/A	0.3091539387	-14.5326219956	4.1862895746	-3.4714803495	0.0005175972	0.0177316955
Contig49506	ref|XP_011867025.1| PREDICTED: mitochondrial-processing peptidase subunit alpha isoform X2 [Vollenhovia emeryi]	0.2742779517	-14.5349999906	4.1962344958	-3.4638197663	0.0005325632	0.0181674513
Contig53192	ref|XP_011688585.1| PREDICTED: uncharacterized protein LOC105450444 [Wasmannia auropunctata]	0.4509650818	-14.5371904194	4.1895428371	-3.4698751116	0.0005207004	0.0178186987
Contig92133	ref|XP_009048959.1| hypothetical protein LOTGIDRAFT_140877, partial [Lottia gigantea]	1.6508722741	-14.5394841795	3.3408030173	-4.3520926269	1.34844266425764E-05	0.0010519023
Contig93830	#N/A	0.5302017175	-14.5421448524	4.1963548641	-3.4654230453	0.000529398	0.0180682006
Contig85197	#N/A	0.4664944182	-14.5499934609	4.1960372196	-3.4675558627	0.0005252146	0.0179327296
Contig61794	ref|XP_011873622.1| PREDICTED: uncharacterized protein LOC105565222 isoform X2 [Vollenhovia emeryi]	0.2937363967	-14.5568296211	4.1875432785	-3.4762218927	0.0005085313	0.0174735255
Contig58870	#N/A	0.1745892445	-14.5595377189	4.1968661623	-3.4691451087	0.0005221174	0.0178387883
Contig60734	#N/A	0.1745892445	-14.5595377189	4.1968661623	-3.4691451087	0.0005221174	0.0178387883
Contig84877	#N/A	0.1745892445	-14.5595377189	4.1968661623	-3.4691451087	0.0005221174	0.0178387883
Contig90875	ref|XP_012530614.1| PREDICTED: high affinity cAMP-specific and IBMX-insensitive 3',5'-cyclic phosphodiesterase 8A isoform X4 [Monomorium pharaonis]	0.1745892445	-14.5595377189	4.1968661623	-3.4691451087	0.0005221174	0.0178387883
Contig71092	ref|XP_011880764.1| PREDICTED: putative golgin subfamily A member 6-like protein 6 [Vollenhovia emeryi]	0.278685516	-14.5598937857	4.1970023295	-3.4691173944	0.0005221712	0.0178387883
Contig52390	#N/A	0.6496351192	-14.5716393214	4.1918695197	-3.4761671977	0.0005086351	0.0174735255
Contig78673	#N/A	0.3508983561	-14.5790097353	4.1994441105	-3.4716522834	0.0005172659	0.0177269255
Contig49517	#N/A	0.2112938996	-14.5838167426	4.2023771379	-3.4703731398	0.0005197358	0.0177943077
Contig76911	ref|XP_002739055.1| PREDICTED: phosphotriesterase-related protein-like [Saccoglossus kowalevskii]	1.0332636146	-14.5885118816	4.1844526738	-3.4863608263	0.0004896401	0.016932128
Contig77059	#N/A	0.9314536608	-14.5946866794	4.1914772713	-3.4819911298	0.0004977002	0.017147901
Contig47969	#N/A	0.3876639163	-14.6113310838	4.2041050309	-3.4754914486	0.0005099182	0.0175113373
Contig108654	ref|XP_011067718.1| PREDICTED: neutral ceramidase isoform X1 [Acromyrmex echinatior]	1.576872072	-14.6122881163	4.1804821375	-3.4953595388	0.0004734236	0.0164856669
Contig127669	ref|XP_011859007.1| PREDICTED: uncharacterized protein LOC105556520 [Vollenhovia emeryi]	0.4479687424	-14.6124198368	4.1877930766	-3.4892888854	0.0004843074	0.0167929298
Contig113870	ref|XP_011870466.1| PREDICTED: uncharacterized protein LOC105563463 isoform X1 [Vollenhovia emeryi]	5.2117730943	-14.6250788352	4.1834100069	-3.495970706	0.0004723406	0.0164668895
Contig47938	#N/A	0.1178628951	-14.6256282139	4.197302007	-3.4845308223	0.0004930007	0.0170191831
Contig56145	#N/A	0.1178628951	-14.6256282139	4.197302007	-3.4845308223	0.0004930007	0.0170191831
Contig85390	#N/A	0.1178628951	-14.6256282139	4.197302007	-3.4845308223	0.0004930007	0.0170191831
Contig93081	ref|XP_011158259.1| PREDICTED: astacin-like isoform X1 [Solenopsis invicta]	0.1178628951	-14.6256282139	4.197302007	-3.4845308223	0.0004930007	0.0170191831
Contig93337	#N/A	0.1178628951	-14.6256282139	4.197302007	-3.4845308223	0.0004930007	0.0170191831
Contig84392	#N/A	0.1546954247	-14.6294337584	4.1951830167	-3.487197984	0.0004881099	0.0168916142
Contig93916	ref|XP_013189495.1| PREDICTED: uncharacterized protein LOC106134085 [Amyelois transitella]	0.1546954247	-14.6294337584	4.1951830167	-3.487197984	0.0004881099	0.0168916142
Contig39582	#N/A	0.3332204937	-14.6307592018	4.1989239999	-3.4844067675	0.0004932293	0.0170229154
Contig4064	ref|XP_015114316.1| PREDICTED: DNA-directed RNA polymerases I, II, and III subunit RPABC4 [Diachasma alloeum]	0.3895852622	-14.6309190981	4.1926466091	-3.4896618919	0.000483632	0.0167818648
Contig80741	ref|XP_014298245.1| PREDICTED: uncharacterized protein LOC103569414 isoform X2 [Microplitis demolitor]	0.8477985708	-14.6319091661	4.1978474356	-3.485574307	0.0004910818	0.0169778289
Contig68617	#N/A	0.7903131241	-14.6386228872	4.1849572248	-3.4979145786	0.0004689113	0.0163756201
Contig137611	ref|XP_014609021.1| PREDICTED: nuclear factor 1 X-type isoform X3 [Polistes canadensis]	1.1713924409	-14.63997246	4.1875697994	-3.4960545523	0.0004721922	0.0164657786
Contig127817	ref|XP_011166822.1| PREDICTED: torso-like protein [Solenopsis invicta]	0.1901625885	-14.6440043968	4.2020793125	-3.4849424077	0.000492243	0.0170138102
Contig97462	ref|XP_011858072.1| PREDICTED: uncharacterized protein LOC105555657 [Vollenhovia emeryi]	0.5570105259	-14.6469967274	4.1992410698	-3.4880104485	0.0004866291	0.0168527516
Contig141136	ref|XP_011696169.1| PREDICTED: leukotriene A-4 hydrolase [Wasmannia auropunctata]	0.5778520519	-14.6599373727	4.1838672126	-3.5039203273	0.0004584625	0.0160703328
Contig103667	#N/A	0.2724756037	-14.6664859232	4.1927782017	-3.4980352448	0.0004686992	0.0163748089
Contig115212	#N/A	0.4365271558	-14.6713844091	4.1935130496	-3.4985903789	0.0004677245	0.0163584342
Contig93231	#N/A	0.2375799467	-14.6908471762	4.2017006273	-3.4964050224	0.0004715723	0.0164522855
Contig59228	#N/A	0.1675966007	-14.6913994262	4.2008033772	-3.497283283	0.0004700224	0.0164063141
Contig48017	#N/A	0.4043248608	-14.6992033491	4.1992917842	-3.5004005686	0.0004645595	0.0162638417
Contig73305	ref|XP_012249091.1| PREDICTED: probable proline--tRNA ligase, mitochondrial [Bombus impatiens]	0.5366463371	-14.7020459183	4.2041046326	-3.4970694602	0.0004703993	0.0164154149
Contig67599	ref|XP_016936021.1| PREDICTED: ras-related protein Rab-11A [Drosophila suzukii]	0.1620063445	-14.7131394518	4.1959114475	-3.5065419364	0.0004539699	0.0159325843
Contig85246	#N/A	0.1754608622	-14.7171535223	4.1948947872	-3.508348664	0.0004508977	0.0158523241
Contig61733	ref|XP_012054020.1| PREDICTED: TFIIH basal transcription factor complex helicase XPD subunit [Atta cephalotes]	2.1640031774	-14.7181229832	4.179238444	-3.5217236778	0.0004287508	0.0151946829
Contig23651	#N/A	0.678195203	-14.7458350245	4.1979950227	-3.5125899256	0.0004437618	0.0156442644
Contig65535	#N/A	0.1747931555	-14.7460745875	4.1951374328	-3.5150396915	0.0004396883	0.0155238963
Contig56974	ref|XP_011870113.1| PREDICTED: UPF0565 protein C2orf69 homolog isoform X1 [Vollenhovia emeryi]	0.1467483918	-14.7491327097	4.1962732645	-3.5148170246	0.0004400571	0.0155330364
Contig80584	ref|XP_011172617.1| PREDICTED: nuclear pore complex protein Nup205 [Solenopsis invicta]	0.6724492862	-14.7549015107	4.1946328467	-3.5175668646	0.0004355226	0.0153960566
Contig58548	#N/A	0.2904482675	-14.7646689408	4.1934703255	-3.5208712104	0.0004301315	0.0152397911
Contig56470	ref|XP_011863304.1| PREDICTED: cation-independent mannose-6-phosphate receptor [Vollenhovia emeryi]	0.3160239356	-14.7656300481	4.1922788973	-3.5221010839	0.0004281409	0.0151806823
Contig126210	#N/A	0.3085118797	-14.7784855102	4.1956288252	-3.5223529358	0.0004277343	0.0151700731
Contig61594	#N/A	0.1991002031	-14.7807200226	4.200913256	-3.5184539937	0.0004340691	0.0153523549
Contig52270	ref|XP_015789038.1| PREDICTED: 60S ribosomal protein L26-like [Tetranychus urticae]	0.4865162131	-14.7808150319	4.1987630396	-3.5202784469	0.000431094	0.0152585885
Contig20614	#N/A	0.4194222091	-14.7825865979	4.1864490042	-3.5310561727	0.0004139038	0.0147647994
Contig99257	ref|XP_017082687.1| PREDICTED: probable cytochrome oxidase subunit 2 [Drosophila eugracilis]	0.3830290896	-14.7850180662	4.194015966	-3.5252650886	0.0004230592	0.015034456
Contig64171	#N/A	0.1669366505	-14.7854861829	4.1953904521	-3.5242217266	0.0004247287	0.0150710416
Contig67295	ref|XP_011686381.1| PREDICTED: uncharacterized protein LOC105449083 [Wasmannia auropunctata]	0.1669366505	-14.7854861829	4.1953904521	-3.5242217266	0.0004247287	0.0150710416
Contig80468	ref|XP_011057503.1| PREDICTED: RNA-binding protein Musashi homolog Rbp6-like isoform X1 [Acromyrmex echinatior]	0.1669366505	-14.7854861829	4.1953904521	-3.5242217266	0.0004247287	0.0150710416
Contig80201	#N/A	0.1915279542	-14.785834204	4.1941626005	-3.5253364289	0.0004229453	0.0150341886
Contig98552	#N/A	0.1915279542	-14.785834204	4.1941626005	-3.5253364289	0.0004229453	0.0150341886
Contig45166	ref|XP_011704625.1| PREDICTED: fibril-forming collagen alpha chain-like [Wasmannia auropunctata]	0.1984940581	-14.7996495751	4.1949249642	-3.5279891063	0.0004187294	0.0148940204
Contig48831	ref|XP_011860170.1| PREDICTED: uncharacterized protein LOC105557523 [Vollenhovia emeryi]	0.2028379191	-14.8003750125	4.1942660877	-3.5287162767	0.0004175806	0.0148734263
Contig114395	ref|XP_011687239.1| PREDICTED: uncharacterized protein LOC105449634 [Wasmannia auropunctata]	0.3836490002	-14.8044496856	4.2002862217	-3.5246287763	0.0004240766	0.0150630357
Contig61407	#N/A	0.2076596802	-14.8104449494	4.1964079732	-3.5293148436	0.0004166371	0.0148510539
Contig111926	#N/A	0.6504062125	-14.820333477	4.1948049205	-3.5330209051	0.00041084	0.0146703202
Contig78950	ref|XP_012060794.1| PREDICTED: ATP-binding cassette sub-family B member 7, mitochondrial [Atta cephalotes]	1.0909769649	-14.8274880386	4.1824140646	-3.5451984929	0.0003923175	0.0141159384
Contig33485	#N/A	0.5028022511	-14.8290663589	4.1823331249	-3.5456444802	0.0003916542	0.0141026477
Contig90389	#N/A	0.2534767794	-14.8412986704	4.1940750593	-3.5386344928	0.0004022023	0.0144128794
Contig75948	ref|XP_012799636.1| ATP-binding cassette sub-family F member 2 [Schistosoma haematobium]	0.4548540242	-14.8421847433	4.192870696	-3.5398622613	0.0004003359	0.0143605645
Contig128038	#N/A	0.2837352844	-14.8456197642	4.1947024532	-3.539135357	0.00040144	0.0143892089
Contig75876	#N/A	0.4099828221	-14.8470914457	4.1950273419	-3.5392120803	0.0004013233	0.0143886773
Contig46515	#N/A	0.2794210549	-14.8490660026	4.1952715696	-3.5394767076	0.0004009211	0.0143779075
Contig82185	ref|XP_012063794.1| PREDICTED: B-cell CLL/lymphoma 7 protein family member B [Atta cephalotes]	0.9179884358	-14.8582745651	4.2027356528	-3.5353816639	0.0004071866	0.0145572405
Contig11700	ref|XP_011158772.1| PREDICTED: CREB-binding protein isoform X3 [Solenopsis invicta]	0.4609006491	-14.8596501761	4.2013175384	-3.5369024218	0.0004048492	0.0144893564
Contig37356	ref|XP_012534360.1| PREDICTED: venom allergen 3-like [Monomorium pharaonis]	0.2569693312	-14.8742067664	4.1896092784	-3.5502610812	0.0003848493	0.0138861207
Contig92156	#N/A	0.1907230632	-14.875328512	4.195149269	-3.545840102	0.0003913636	0.0140995673
Contig121437	ref|XP_012056069.1| PREDICTED: myosin-IB [Atta cephalotes]	1.0067415059	-14.8768695735	4.1789828698	-3.5599259525	0.0003709594	0.0134709451
Contig145962	#N/A	0.3933778043	-14.8901053094	4.1996234757	-3.5455810255	0.0003917485	0.0141026477
Contig92917	ref|XP_011162339.1| PREDICTED: glycerophosphocholine phosphodiesterase GPCPD1-like [Solenopsis invicta]	10.2584131462	-14.8912618696	4.1903334893	-3.5537175997	0.0003798268	0.0137224219
Contig142085	#N/A	0.1735199066	-14.8979825433	4.204019872	-3.5437469367	0.0003944837	0.0141830896
Contig62185	ref|XP_017118381.1| PREDICTED: ribosome-associated ATPase-like [Drosophila elegans]	0.2893290678	-14.8983728395	4.1987626561	-3.548276971	0.0003877602	0.0139804435
Contig81795	#N/A	1.0568510146	-14.9102209365	4.1828277929	-3.5646270119	0.000364374	0.0132891972
Contig32244	#N/A	0.3519940075	-14.9115039525	4.2020601899	-3.5486174111	0.0003872593	0.0139695119
Contig50192	ref|XP_011630913.1| PREDICTED: exosome complex component RRP43-like [Pogonomyrmex barbatus]	0.5148566154	-14.9197132642	4.1929110459	-3.5583185765	0.0003732365	0.0135327666
Contig112944	#N/A	0.204467513	-14.9235821027	4.1972460207	-3.5555652514	0.0003771673	0.0136515828
Contig65295	#N/A	0.4511940244	-14.9250708279	4.1935289189	-3.559071874	0.0003721677	0.01350788
Contig1673	#N/A	0.3828050764	-14.9312534112	4.1879868911	-3.5652579149	0.0003634986	0.0132647868
Contig64852	ref|XP_011876417.1| PREDICTED: protein trachealess isoform X8 [Vollenhovia emeryi]	0.7896073627	-14.9359686748	4.2004219848	-3.5558257549	0.0003767938	0.0136442406
Contig79223	ref|XP_012542605.1| PREDICTED: outer dense fiber protein 3-like, partial [Monomorium pharaonis]	0.1671870078	-14.9365822542	4.1955456657	-3.5601047978	0.0003707068	0.0134686969
Contig88645	#N/A	0.1671870078	-14.9365822542	4.1955456657	-3.5601047978	0.0003707068	0.0134686969
Contig37912	#N/A	0.1731116894	-14.9371243768	4.194632729	-3.5610088753	0.0003694326	0.0134327631
Contig91376	#N/A	0.1731116894	-14.9371243768	4.194632729	-3.5610088753	0.0003694326	0.0134327631
Contig65280	#N/A	0.1934941171	-14.9480258198	4.1975723153	-3.5611121613	0.0003692873	0.0134327631
Contig46020	#N/A	0.2901976786	-14.9514386688	4.1862721695	-3.5715400393	0.0003548883	0.0129975763
Contig38779	#N/A	0.2660817755	-14.9531881251	4.1965865226	-3.5631787989	0.0003663909	0.0133462079
Contig16901	ref|XP_011698542.1| PREDICTED: Down syndrome cell adhesion molecule-like protein Dscam2 [Wasmannia auropunctata]	0.324108683	-14.9597428726	4.1968641961	-3.5645048716	0.0003645437	0.0132891972
Contig32117	#N/A	0.4429277969	-14.9670415206	4.1833824376	-3.5777368538	0.0003465821	0.0127329727
Contig149534	#N/A	0.2193539209	-14.9685250087	4.1955982424	-3.5676735816	0.0003601648	0.013160125
Contig74991	#N/A	0.223254535	-14.9705791969	4.1936395298	-3.5698297602	0.0003572133	0.0130732917
Contig96998	#N/A	0.5243976522	-14.9777044415	4.1917549256	-3.5731345719	0.0003527334	0.0129253545
Contig72225	#N/A	0.1598922261	-14.9802084655	4.1963540909	-3.5698151636	0.0003572332	0.0130732917
Contig61892	#N/A	0.3013590833	-14.9850549308	4.1983554318	-3.5692678179	0.0003579803	0.0130972413
Contig131124	#N/A	0.4478973809	-14.9976236738	4.199003087	-3.5717105616	0.0003546572	0.0129924824
Contig79147	#N/A	0.2772303941	-15.0052959505	4.1931575551	-3.5785194697	0.0003455461	0.0126982137
Contig113774	#N/A	0.3062410852	-15.0065476546	4.190056799	-3.5814664035	0.0003416711	0.0125819908
Contig30793	ref|XP_011707681.1| PREDICTED: fibrillin-1-like isoform X2 [Wasmannia auropunctata]	0.4712953522	-15.0125832858	4.1930320388	-3.580364554	0.0003431152	0.0126252978
Contig60492	#N/A	0.6412333898	-15.0218974307	4.1993708477	-3.5771781002	0.0003473235	0.0127535795
Contig78670	#N/A	0.3443804149	-15.0265022182	4.1847918849	-3.5907406226	0.0003297397	0.0121966555
Contig72167	#N/A	74.4747082799	-15.0304971515	4.1914764425	-3.585967226	0.0003358311	0.0124024914
Contig49231	ref|XP_011703346.1| PREDICTED: integrin beta-PS-like [Wasmannia auropunctata]	0.2833567461	-15.0373794405	4.2003878356	-3.5799978547	0.000343597	0.0126397369
Contig106081	#N/A	0.1314525982	-15.0385027777	4.1975056645	-3.5827236411	0.0003400303	0.0125248331
Contig58883	#N/A	0.1314525982	-15.0385027777	4.1975056645	-3.5827236411	0.0003400303	0.0125248331
Contig67783	#N/A	0.563801361	-15.0389986934	4.1949610151	-3.5850151263	0.0003370587	0.012438382
Contig68673	ref|XP_011883372.1| PREDICTED: protein tramtrack, alpha isoform isoform X1 [Vollenhovia emeryi]	0.3763736705	-15.040073683	4.1977621194	-3.5828789853	0.0003398281	0.0125239139
Contig95309	#N/A	0.1933302345	-15.0410827092	4.1947771261	-3.5856690968	0.0003362151	0.0124134255
Contig110783	#N/A	0.132955982	-15.0483614194	4.1977398334	-3.58487234	0.0003372431	0.012438382
Contig39485	#N/A	0.132955982	-15.0483614194	4.1977398334	-3.58487234	0.0003372431	0.012438382
Contig84839	#N/A	0.132955982	-15.0483614194	4.1977398334	-3.58487234	0.0003372431	0.012438382
Contig65091	#N/A	0.2622456543	-15.0512219178	4.197100264	-3.5861001575	0.0003356601	0.0123994151
Contig32879	#N/A	1.6533520099	-15.0599679026	4.1990491291	-3.5865186235	0.0003351221	0.0123827806
Contig87878	#N/A	0.4784375993	-15.0702857152	4.1865253016	-3.5997120833	0.0003185697	0.0118447295
Contig79830	#N/A	0.6229242072	-15.0709801661	4.1818701207	-3.6038852788	0.0003134955	0.0116910875
Contig148353	ref|XP_011703975.1| PREDICTED: uncharacterized protein KIAA0556-like isoform X1 [Wasmannia auropunctata]	1.1160934035	-15.0728023147	4.1824659097	-3.603807572	0.0003135893	0.0116910875
Contig63261	#N/A	0.162398463	-15.0780139516	4.1941045255	-3.5950496369	0.0003243297	0.0120343536
Contig91434	ref|XP_015609550.1| PREDICTED: lysosomal aspartic protease-like [Cephus cinctus]	0.162398463	-15.0780139516	4.1941045255	-3.5950496369	0.0003243297	0.0120343536
Contig91000	#N/A	0.3459173069	-15.0982356814	4.1863481224	-3.6065408896	0.000310306	0.0115870254
Contig90994	#N/A	0.2177453852	-15.1040035027	4.1946540123	-3.6007745713	0.0003172706	0.0118065264
Contig110337	ref|XP_011165057.1| PREDICTED: uncharacterized protein LOC105199598 [Solenopsis invicta]	0.397109792	-15.1203961864	4.1858572945	-3.6122579253	0.0003035424	0.0113765607
Contig119435	#N/A	0.406456658	-15.1222403805	4.1946793055	-3.6051004807	0.0003120322	0.0116422526
Contig39457	#N/A	0.5838029855	-15.1309403253	4.2002142902	-3.6024210385	0.0003152672	0.0117381573
Contig95765	#N/A	0.3318255178	-15.1403773378	4.1925539365	-3.6112540392	0.00030472	0.0114055685
Contig46078	ref|XP_011861118.1| PREDICTED: uncharacterized protein LOC105558172 [Vollenhovia emeryi]	0.2858005612	-15.1412292444	4.1991679756	-3.6057688886	0.00031123	0.011615391
Contig122453	#N/A	0.327513354	-15.1441731859	4.1870609976	-3.6168981523	0.0002981546	0.0111992881
Contig69457	#N/A	0.4813194575	-15.1482215836	4.1962536161	-3.6099394768	0.0003062685	0.0114604911
Contig61391	#N/A	0.1939745127	-15.1542789446	4.1957741912	-3.6117956435	0.0003040842	0.011388624
Contig63283	ref|XP_014472522.1| PREDICTED: WD repeat-containing protein 81 isoform X1 [Dinoponera quadriceps]	0.3064013152	-15.1607461518	4.1861914598	-3.6216083992	0.0002927771	0.0110433857
Contig31895	ref|XP_011867780.1| PREDICTED: cleft lip and palate transmembrane protein 1-like protein [Vollenhovia emeryi]	0.6242527119	-15.1611329273	4.1928246126	-3.6159711718	0.0002992237	0.0112297303
Contig44672	#N/A	0.4974189106	-15.1651033361	4.1809838257	-3.6271614453	0.0002865541	0.0108666773
Contig24430	ref|XP_011858347.1| PREDICTED: putative nuclease HARBI1 [Vollenhovia emeryi]	1.1780659163	-15.1668153622	3.5929826481	-4.2212325657	0.000024297	0.0015612611
Contig66303	#N/A	0.7876612519	-15.1742792509	4.1909449723	-3.620729776	0.0002937732	0.0110720924
Contig5085	#N/A	1.1555930843	-15.1840690541	3.4721333468	-4.3731238226	1.22481207597552E-05	0.0009977615
Contig54232	ref|XP_011865391.1| PREDICTED: uncharacterized protein KIAA0556-like isoform X1 [Vollenhovia emeryi]	2.1697440733	-15.1925868381	3.8655795302	-3.9302222913	8.48673641689557E-05	0.0039466343
Contig60396	#N/A	0.1713084411	-15.1931460759	4.1948217847	-3.6218811801	0.0002924685	0.0110376377
Contig65192	ref|XP_011859778.1| PREDICTED: probable tRNA N6-adenosine threonylcarbamoyltransferase isoform X1 [Vollenhovia emeryi]	0.1713084411	-15.1931460759	4.1948217847	-3.6218811801	0.0002924685	0.0110376377
Contig30602	#N/A	0.613288817	-15.1971263556	4.1937642659	-3.623743585	0.0002903695	0.0109789501
Contig119884	ref|XP_011170369.1| PREDICTED: uncharacterized protein LOC105203292 [Solenopsis invicta]	0.6961086068	-15.2095900062	4.1840149006	-3.6351663098	0.0002778014	0.0105801885
Contig85744	#N/A	0.6482205201	-15.2127795155	3.7218756989	-4.0873959117	4.36242296287478E-05	0.0024003009
Contig122508	#N/A	0.1478827813	-15.2160579881	4.1980936913	-3.6245160559	0.000289503	0.010954984
Contig138441	#N/A	0.1478827813	-15.2160579881	4.1980936913	-3.6245160559	0.000289503	0.010954984
Contig138684	#N/A	0.1478827813	-15.2160579881	4.1980936913	-3.6245160559	0.000289503	0.010954984
Contig138809	#N/A	0.1478827813	-15.2160579881	4.1980936913	-3.6245160559	0.000289503	0.010954984
Contig145753	#N/A	0.1478827813	-15.2160579881	4.1980936913	-3.6245160559	0.000289503	0.010954984
Contig150352	#N/A	0.1478827813	-15.2160579881	4.1980936913	-3.6245160559	0.000289503	0.010954984
Contig16505	ref|YP_009115389.1| NADH dehydrogenase subunit 4 (mitochondrion) [Myrmica scabrinodis]	5.6641271613	-15.2287151545	4.1944854361	-3.6306515749	0.0002827066	0.0107380638
Contig60574	ref|XP_017042292.1| PREDICTED: chaperone protein ClpB-like, partial [Drosophila ficusphila]	1.0606854332	-15.2355879278	4.1917503947	-3.6346601046	0.0002783474	0.0105981263
Contig76318	#N/A	0.2128560267	-15.2383114123	4.1950142825	-3.6324814139	0.0002807088	0.0106679159
Contig118430	ref|XP_011173487.1| PREDICTED: vacuolar protein sorting-associated protein 16 homolog [Solenopsis invicta]	4.6736454537	-15.2550299822	4.1797296642	-3.6497647474	0.0002624806	0.0100645101
Contig123548	#N/A	0.8590026382	-15.2656953585	4.1965732314	-3.6376573258	0.0002751291	0.0104868955
Contig88996	#N/A	0.181777673	-15.2834088095	4.1962970277	-3.6421179694	0.0002704041	0.010326294
Contig53132	#N/A	0.6471995328	-15.2862141489	4.1920083592	-3.6465132793	0.0002658227	0.0101650762
Contig78347	ref|XP_011863695.1| PREDICTED: centrosomal protein of 152 kDa-like isoform X2 [Vollenhovia emeryi]	1.8782337841	-15.2993347868	4.1757125963	-3.6638859677	0.0002484174	0.0096034571
Contig35867	ref|XP_011858733.1| PREDICTED: uncharacterized protein LOC105556257, partial [Vollenhovia emeryi]	0.3688916435	-15.3020087008	4.1879028771	-3.6538594972	0.0002583277	0.0099187294
Contig129994	ref|XP_006622629.1| PREDICTED: 40S ribosomal protein S4-like [Apis dorsata]	0.5488295822	-15.3025161561	4.0057885498	-3.8201008281	0.0001333971	0.0056858565
Contig86695	ref|XP_017091895.1| PREDICTED: transcription termination/antitermination protein NusA-like [Drosophila bipectinata]	1.0854005214	-15.304052077	4.1946500109	-3.6484693686	0.0002638073	0.0101098961
Contig101323	#N/A	1.0960160439	-15.3044866861	4.1785782056	-3.6626062582	0.0002496621	0.0096462978
Contig31489	#N/A	0.5136228563	-15.3053875023	4.186894009	-3.6555469208	0.0002566343	0.0098644318
Contig57548	#N/A	0.6497692044	-15.3119269123	3.7621304467	-4.0700148837	4.70101343249928E-05	0.0025528021
Contig82044	ref|XP_015918911.1| PREDICTED: uncharacterized protein LOC107448283 [Parasteatoda tepidariorum]	0.556583323	-15.3163284211	4.1905161267	-3.6549980857	0.0002571839	0.00988287
Contig133644	#N/A	0.3758770336	-15.3261159933	4.1953429681	-3.653125885	0.0002590671	0.0099444199
Contig62469	ref|XP_011859152.1| PREDICTED: uncharacterized protein LOC105556668 [Vollenhovia emeryi]	0.3941068669	-15.3289274767	4.192224807	-3.6565137087	0.0002556687	0.0098353462
Contig34938	#N/A	0.4283168644	-15.3396471183	4.1922032336	-3.6590895679	0.0002531129	0.0097574818
Contig38152	ref|XP_011169061.1| PREDICTED: prohormone-4 [Solenopsis invicta]	0.5748381824	-15.3439326847	4.1939975417	-3.6585459414	0.0002536503	0.0097683355
Contig91247	#N/A	0.5525676588	-15.3571802485	4.1866573662	-3.66812445	0.0002443363	0.0094741986
Contig45178	#N/A	0.1192928606	-15.368945319	4.1976770664	-3.6612976834	0.000250941	0.0096824708
Contig20914	ref|XP_015125965.1| PREDICTED: PTS system alpha-glucoside-specific EIICB component-like, partial [Diachasma alloeum]	0.7645668598	-15.369873727	4.1937788016	-3.6649223657	0.0002474136	0.0095751308
Contig54053	#N/A	0.4133720782	-15.3947364504	4.1990093097	-3.6662782373	0.0002461061	0.0095323631
Contig190	#N/A	0.435352032	-15.3985190528	4.1940359726	-3.6715276534	0.000241105	0.0093591788
Contig121180	ref|XP_011687748.1| PREDICTED: O-glucosyltransferase rumi homolog isoform X1 [Wasmannia auropunctata]	0.1173637954	-15.3987417675	4.199272024	-3.6670026804	0.0002454102	0.0095106222
Contig62919	#N/A	1.5878228197	-15.3995520581	4.1689720015	-3.69384876	0.0002208852	0.0086985555
Contig34662	ref|XP_011875564.1| PREDICTED: uncharacterized protein LOC105566285 [Vollenhovia emeryi]	3.4408722641	-15.4063707538	4.1751225715	-3.6900403497	0.0002242185	0.0088126284
Contig130713	#N/A	0.148543103	-15.4174006142	4.1985056804	-3.6721161737	0.0002405503	0.0093450554
Contig131194	#N/A	0.148543103	-15.4174006142	4.1985056804	-3.6721161737	0.0002405503	0.0093450554
Contig22985	ref|XP_011871373.1| PREDICTED: uncharacterized protein LOC105563955, partial [Vollenhovia emeryi]	0.148543103	-15.4174006142	4.1985056804	-3.6721161737	0.0002405503	0.0093450554
Contig140058	ref|XP_011873691.1| PREDICTED: GDP-fucose transporter 1 [Vollenhovia emeryi]	1.2449638708	-15.4189934369	4.1710109624	-3.6967041267	0.0002184166	0.0086181561
Contig73291	#N/A	0.2197716024	-15.4211645041	4.1928442971	-3.6779721381	0.0002350956	0.0091611439
Contig76723	ref|XP_011702375.1| PREDICTED: protein SPT2 homolog isoform X2 [Wasmannia auropunctata]	2.2278846242	-15.424352442	4.1914335793	-3.6799706234	0.0002332608	0.0091047112
Contig72095	ref|XP_011697546.1| PREDICTED: uncharacterized protein LOC105455715 [Wasmannia auropunctata]	0.2634795506	-15.4247963166	4.1944469947	-3.6774326475	0.0002355933	0.0091729458
Contig67920	ref|XP_017082551.1| PREDICTED: endonuclease III-like [Drosophila eugracilis]	0.4844135726	-15.4280192881	4.1857058263	-3.6858823645	0.0002279116	0.0089329341
Contig68741	#N/A	0.373643997	-15.441195375	4.1930527129	-3.6825664813	0.0002308976	0.0090199452
Contig128582	#N/A	0.1594566209	-15.4437901368	4.1978298876	-3.6789938016	0.000234156	0.0091270993
Contig139014	#N/A	0.1594566209	-15.4437901368	4.1978298876	-3.6789938016	0.000234156	0.0091270993
Contig141639	#N/A	0.1594566209	-15.4437901368	4.1978298876	-3.6789938016	0.000234156	0.0091270993
Contig44101	ref|XP_011055221.1| PREDICTED: protein unc-45 homolog B [Acromyrmex echinatior]	0.1594566209	-15.4437901368	4.1978298876	-3.6789938016	0.000234156	0.0091270993
Contig99517	ref|XP_011879875.1| PREDICTED: uncharacterized protein C11orf70 homolog [Vollenhovia emeryi]	2.4212858237	-15.4477953652	3.3001325954	-4.6809620276	2.85531828791846E-06	0.0003634666
Contig137407	ref|XP_011858099.1| PREDICTED: uncharacterized protein LOC105555682 isoform X2 [Vollenhovia emeryi]	0.7587566102	-15.448908456	4.192327888	-3.6850429806	0.000228664	0.0089549734
Contig28475	ref|XP_015785005.1| PREDICTED: elongation factor 1-alpha [Tetranychus urticae]	0.7074272141	-15.4647619307	4.1808296432	-3.6989696425	0.0002164765	0.0085511542
Contig139805	#N/A	0.1722022565	-15.4759332275	4.197920578	-3.6865712297	0.0002272958	0.0089119711
Contig97935	ref|XP_011706105.1| PREDICTED: nuclear factor related to kappa-B-binding protein isoform X3 [Wasmannia auropunctata]	2.5797274003	-15.4776614394	4.1913608788	-3.6927532338	0.0002218393	0.0087288281
Contig120308	#N/A	0.1830413508	-15.4796198677	4.1975746733	-3.6877533034	0.0002262428	0.00888231
Contig108464	ref|XP_012146863.1| PREDICTED: phospholipid scramblase 2-like isoform X1 [Megachile rotundata]	0.3716630048	-15.4855740186	4.1857734218	-3.6995729243	0.0002159626	0.0085356265
Contig86093	ref|XP_012521490.1| PREDICTED: putative leucine-rich repeat-containing protein DDB_G0290503 [Monomorium pharaonis]	0.5403431902	-15.4887894439	4.1969604294	-3.6904778362	0.0002238332	0.0087999328
Contig20255	#N/A	1.3146114561	-15.4911302124	4.1861076313	-3.7006048522	0.0002150862	0.0085152795
Contig23285	#N/A	0.4275864611	-15.4923986868	4.1933919165	-3.6944790745	0.000220338	0.0086802243
Contig63237	ref|XP_011049392.1| PREDICTED: pyroglutamylated RFamide peptide receptor-like isoform X1 [Acromyrmex echinatior]	0.920592588	-15.4932629017	4.1934598934	-3.6946252725	0.0002202113	0.0086802243
Contig45753	#N/A	0.5967512167	-15.4985496834	4.1796746726	-3.7080756034	0.0002088403	0.0083052377
Contig33281	ref|XP_014488946.1| PREDICTED: cuticle protein 16.5, isoform B-like [Dinoponera quadriceps]	0.8169323954	-15.5012651899	4.1929524338	-3.6969809304	0.0002181787	0.008611173
Contig25423	#N/A	0.8512295511	-15.5017724406	4.1902345276	-3.6994999536	0.0002160247	0.0085356933
Contig112813	#N/A	0.4406814269	-15.5106013573	4.1924892023	-3.6996162921	0.0002159257	0.0085356265
Contig125902	ref|XP_011699345.1| PREDICTED: uncharacterized protein LOC105456759 [Wasmannia auropunctata]	22.8370531193	-15.5208818717	4.1829239392	-3.7105340899	0.0002068224	0.0082412269
Contig135554	#N/A	0.198239442	-15.5248003348	4.1957752394	-3.7001029486	0.000215512	0.0085249726
Contig138836	#N/A	0.198239442	-15.5248003348	4.1957752394	-3.7001029486	0.000215512	0.0085249726
Contig33570	#N/A	0.1595924767	-15.5278583628	4.1969293443	-3.6998140996	0.0002157575	0.0085322925
Contig20022	ref|XP_012543046.1| PREDICTED: uncharacterized protein LOC105840611 isoform X1 [Monomorium pharaonis]	1.1122385327	-15.5367752448	4.1864671379	-3.7111900639	0.0002062871	0.0082222154
Contig41379	ref|XP_011871770.1| PREDICTED: Hermansky-Pudlak syndrome 1 protein homolog isoform X1 [Vollenhovia emeryi]	2.4287588993	-15.5383937866	4.1906846288	-3.7078413584	0.0002090335	0.0083105829
Contig103137	#N/A	0.2247685691	-15.5438319813	4.1952124223	-3.7051358589	0.0002112775	0.0083881242
Contig108235	#N/A	0.3306467966	-15.5447315987	4.1934763824	-3.7068842605	0.0002098248	0.0083373485
Contig47910	#N/A	0.1838228041	-15.5866985648	4.1965571872	-3.7141632699	0.0002038771	0.0081330402
Contig48015	ref|XP_009166044.1| hypothetical protein T265_03319 [Opisthorchis viverrini]	0.1838228041	-15.5866985648	4.1965571872	-3.7141632699	0.0002038771	0.0081330402
Contig69321	ref|XP_017064538.1| PREDICTED: K(+)/H(+) antiporter NhaP2-like [Drosophila eugracilis]	0.3974129799	-15.5871569614	4.1864669418	-3.7232246613	0.0001966943	0.0078955459
Contig147893	#N/A	0.8465282371	-15.5934765825	4.1930079383	-3.7189236967	0.0002000735	0.0080063331
Contig80273	#N/A	0.331808199	-15.5961186611	4.1871481773	-3.7247591919	0.0001955018	0.0078566016
Contig146379	#N/A	6.7945466764	-15.5990906279	4.1957390039	-3.7178410319	0.0002009326	0.0080337236
Contig82299	#N/A	0.760838935	-15.6027629544	4.1914983424	-3.7224786174	0.0001972766	0.0079144221
Contig29622	#N/A	0.5346090851	-15.620114867	4.1901024726	-3.727859872	0.0001931127	0.0077725718
Contig33822	#N/A	1.0483432541	-15.6234744377	4.1784572321	-3.7390533323	0.0001847145	0.0074869795
Contig133028	#N/A	0.2724350763	-15.6303896522	4.195266857	-3.7257200043	0.0001947585	0.0078289592
Contig6349	#N/A	0.3604540645	-15.6321622197	4.1921924633	-3.7288751307	0.0001923364	0.0077470239
Contig50672	ref|XP_011050769.1| PREDICTED: uncharacterized protein LOC105143901 [Acromyrmex echinatior]	0.2081409706	-15.6327859713	4.1936160888	-3.7277580113	0.0001931907	0.0077725718
Contig50962	ref|XP_012217600.1| PREDICTED: UDP-glucuronosyltransferase 2B33-like [Linepithema humile]	0.2363825939	-15.6338191563	4.1938880702	-3.7277626142	0.0001931872	0.0077725718
Contig9083	#N/A	1.0334156679	-15.634414721	4.1936147263	-3.7281476104	0.0001928924	0.0077672032
Contig41202	#N/A	0.6083183151	-15.6380173744	4.1779360908	-3.7430006191	0.0001818358	0.007380882
Contig24919	#N/A	0.6772783753	-15.6387577037	4.186559413	-3.7354677579	0.0001873666	0.0075770854
Contig83058	ref|XP_011692840.1| PREDICTED: dystrobrevin beta-like isoform X4 [Wasmannia auropunctata]	2.3686838151	-15.6416709511	3.8952754001	-4.0155494399	5.93074639857751E-05	0.0029949845
Contig138291	#N/A	0.1544514301	-15.6537511158	4.1962691139	-3.7303973341	0.000191178	0.0077091561
Contig46744	ref|XP_011866107.1| PREDICTED: succinyl-CoA ligase [ADP/GDP-forming] subunit alpha, mitochondrial isoform X3 [Vollenhovia emeryi]	0.7150375501	-15.658434332	4.1960058321	-3.7317475139	0.000190156	0.0076745155
Contig63284	#N/A	0.1715051399	-15.6593884037	4.1974855294	-3.7306592945	0.0001909793	0.0077033425
Contig52645	#N/A	61.3080546945	-15.671128387	4.1941806496	-3.7363980468	0.0001866751	0.0075571202
Contig149168	#N/A	0.1958614101	-15.6742256294	4.1975204044	-3.734163058	0.0001883404	0.0076121111
Contig47162	#N/A	0.1717602611	-15.6779514166	4.1961441865	-3.7362756663	0.0001867659	0.0075571202
Contig61145	#N/A	0.1717602611	-15.6779514166	4.1961441865	-3.7362756663	0.0001867659	0.0075571202
Contig85512	#N/A	0.1717602611	-15.6779514166	4.1961441865	-3.7362756663	0.0001867659	0.0075571202
Contig35645	#N/A	0.5444190672	-15.6868449734	3.9458813352	-3.9754984098	0.000070232	0.0033961577
Contig57574	#N/A	0.3282427459	-15.7199307061	4.194975851	-3.7473232897	0.0001787317	0.0072695015
Contig84482	ref|XP_011059082.1| PREDICTED: uncharacterized protein LOC105148835 [Acromyrmex echinatior]	0.8047275176	-15.7206574014	4.1931614308	-3.7491180965	0.0001774575	0.0072259982
Contig10405	#N/A	0.8211032953	-15.7243939822	4.197259481	-3.746347838	0.0001794278	0.0072915167
Contig33547	#N/A	0.1787986629	-15.7261132508	4.1965000768	-3.7474354731	0.0001786518	0.0072683443
Contig17651	ref|XP_008188257.1| PREDICTED: uncharacterized protein LOC100160950 [Acyrthosiphon pisum]	0.3335445015	-15.7405048127	4.1875419097	-3.7588889024	0.0001706696	0.006979769
Contig18189	#N/A	0.3257556669	-15.7411180463	4.1923859595	-3.7546920056	0.0001735548	0.0070793207
Contig42192	#N/A	0.2068336294	-15.7614481754	4.1949472301	-3.7572458749	0.0001717937	0.0070176155
Contig95732	#N/A	0.2068336294	-15.7614481754	4.1949472301	-3.7572458749	0.0001717937	0.0070176155
Contig29224	ref|XP_012527508.1| PREDICTED: inactive peptidyl-prolyl cis-trans isomerase FKBP6-like [Monomorium pharaonis]	0.6411437446	-15.7630250668	4.1985819889	-3.7543687627	0.0001737789	0.0070864163
Contig109689	#N/A	0.1551117518	-15.765730415	4.196615101	-3.7567730267	0.0001721185	0.0070268199
Contig99614	ref|XP_014472361.1| PREDICTED: transcription factor Sox-9-B-like [Dinoponera quadriceps]	0.2497483661	-15.7667881005	4.1952937263	-3.7582083947	0.0001711343	0.0069967497
Contig99612	ref|XP_011167493.1| PREDICTED: transcription factor SOX-9-like [Solenopsis invicta]	0.4718914671	-15.7685850473	4.1970731028	-3.7570432206	0.0001719328	0.0070212689
[truncated: 2,438 more rows]

## Sheet: c)
Cont	Annotation	baseMean	log2FoldChange	lfcSE	stat	pvalue	padj
[truncated: 4,242 more rows]

## Sheet: d)
Cont	Annotation	baseMean	log2FoldChange	lfcSE	stat	pvalue	padj
[truncated: 3,878 more rows]
