# Supplementary material for: Immune challenge reduces gut microbial diversity and triggers fertility-dependent gene expression changes in a social insect
Source: BMC Genomics. 2020 Nov 23;21:816. doi: 10.1186/s12864-020-07191-9 (PMC7682046; doi:10.1186/s12864-020-07191-9)
Supplement: Supplementary file 1 — Additional file 1. Additional methodological details, Figures S1 and S2 and Table S2. Description of additional supplementary tables (Tables S1, S3-S18) are also provided. [file 12864_2020_7191_MOESM1_ESM.zip › Table_S11.xlsx]

## Sheet: a)
	GO.ID	Term	Annotated	Significant	Expected	Fisher
1	GO:0006811	ion transport	865	9	3.52	0.015
2	GO:0007186	G-protein coupled receptor signaling pat...	397	6	1.61	0.017
3	GO:0097428	protein maturation by iron-sulfur cluste...	7	1	0.03	0.028
4	GO:0006812	cation transport	413	4	1.68	0.031
5	GO:0009395	phospholipid catabolic process	8	1	0.03	0.032
6	GO:0051205	protein insertion into membrane	8	1	0.03	0.032
7	GO:0006177	GMP biosynthetic process	10	1	0.04	0.04
8	GO:0006313	transposition, DNA-mediated	199	3	0.81	0.047
9	GO:0007172	signal complex assembly	12	1	0.05	0.048
10	GO:0030488	tRNA methylation	12	1	0.05	0.048
11	GO:0006952	defense response	13	1	0.05	0.052
12	GO:0009312	oligosaccharide biosynthetic process	14	1	0.06	0.055
13	GO:0051259	protein oligomerization	34	2	0.14	0.058
14	GO:0006021	inositol biosynthetic process	15	1	0.06	0.059
15	GO:0006468	protein phosphorylation	871	7	3.54	0.062
16	GO:0051260	protein homooligomerization	19	1	0.08	0.075
17	GO:0007205	protein kinase C-activating G-protein co...	22	1	0.09	0.086
18	GO:0006730	one-carbon metabolic process	25	1	0.1	0.097
19	GO:0042147	retrograde transport, endosome to Golgi	28	1	0.11	0.108
20	GO:0043401	steroid hormone mediated signaling pathw...	32	1	0.13	0.122
21	GO:0007165	signal transduction	1420	15	5.77	0.124
22	GO:0032259	methylation	108	3	0.44	0.136
23	GO:0006479	protein methylation	36	1	0.15	0.137
24	GO:0070588	calcium ion transmembrane transport	40	1	0.16	0.151
25	GO:0008299	isoprenoid biosynthetic process	41	1	0.17	0.154
26	GO:0006182	cGMP biosynthetic process	45	1	0.18	0.168
27	GO:0035556	intracellular signal transduction	538	4	2.19	0.175
28	GO:0006400	tRNA modification	62	2	0.25	0.182
29	GO:0008654	phospholipid biosynthetic process	73	1	0.3	0.258
30	GO:0006139	nucleobase-containing compound metabolic...	3383	12	13.75	0.26
31	GO:0055085	transmembrane transport	1139	6	4.63	0.306
32	GO:0006813	potassium ion transport	98	1	0.4	0.33
33	GO:0007155	cell adhesion	106	1	0.43	0.352
34	GO:0006470	protein dephosphorylation	107	1	0.43	0.354
35	GO:0007166	cell surface receptor signaling pathway	171	1	0.69	0.504
36	GO:0007017	microtubule-based process	217	1	0.88	0.589
37	GO:0006355	regulation of transcription, DNA-templat...	747	3	3.04	0.591
38	GO:0006396	RNA processing	504	3	2.05	0.711
39	GO:0015031	protein transport	397	1	1.61	0.806
40	GO:0008152	metabolic process	10111	33	41.09	0.875
41	GO:0005975	carbohydrate metabolic process	736	3	2.99	0.908
42	GO:0019752	carboxylic acid metabolic process	607	1	2.47	0.92
43	GO:0006508	proteolysis	1020	2	4.15	0.926
44	GO:0055114	oxidation-reduction process	1668	1	6.78	0.999
45	GO:0071822	protein complex subunit organization	162	3	0.66	1
46	GO:0006399	tRNA metabolic process	363	2	1.48	1
47	GO:0090150	establishment of protein localization to...	33	1	0.13	1
48	GO:0050789	regulation of biological process	2389	17	9.71	1
49	GO:0008150	biological_process	14763	60	60	1
50	GO:0051234	establishment of localization	2616	14	10.63	1
51	GO:0071396	cellular response to lipid	32	1	0.13	1
52	GO:1901615	organic hydroxy compound metabolic proce...	60	1	0.24	1
53	GO:0006810	transport	2608	13	10.6	1
54	GO:1901617	organic hydroxy compound biosynthetic pr...	25	1	0.1	1
55	GO:0009187	cyclic nucleotide metabolic process	85	1	0.35	1
56	GO:0045184	establishment of protein localization	405	2	1.65	1
57	GO:0006816	calcium ion transport	45	1	0.18	1
58	GO:0010467	gene expression	2239	7	9.1	1
59	GO:0034660	ncRNA metabolic process	417	2	1.69	1
60	GO:0010468	regulation of gene expression	813	3	3.3	1

## Sheet: b)
	GO.ID	Term	Annotated	Significant	Expected	Fisher
1	GO:0003333	amino acid transmembrane transport	74	1	0.02	0.015
2	GO:0006508	proteolysis	1020	1	0.21	0.193
3	GO:0007165	signal transduction	1420	1	0.29	0.262

## Sheet: c)
	GO.ID	Term	Annotated	Significant	Expected	Fisher
1	GO:0006313	transposition, DNA-mediated	199	4	0.67	0.0045
2	GO:0015031	protein transport	397	4	1.34	0.0203
3	GO:0006376	mRNA splice site selection	12	1	0.04	0.0399
4	GO:0007186	G-protein coupled receptor signaling pat...	397	4	1.34	0.0450
5	GO:0006021	inositol biosynthetic process	15	1	0.05	0.0496
6	GO:0006094	gluconeogenesis	20	1	0.07	0.0656
7	GO:0006298	mismatch repair	25	1	0.08	0.0814
8	GO:0009058	biosynthetic process	2947	7	9.98	0.0848
9	GO:0007156	homophilic cell adhesion via plasma memb...	27	1	0.09	0.0876
10	GO:0042147	retrograde transport, endosome to Golgi	28	1	0.09	0.0907
11	GO:0006888	ER to Golgi vesicle-mediated transport	28	1	0.09	0.0907
12	GO:0007166	cell surface receptor signaling pathway	171	2	0.58	0.1140
13	GO:0006979	response to oxidative stress	52	1	0.18	0.1620
14	GO:0006414	translational elongation	54	1	0.18	0.1677
15	GO:0006397	mRNA processing	142	2	0.48	0.1956
16	GO:0006261	DNA-dependent DNA replication	68	1	0.23	0.2064
17	GO:0008654	phospholipid biosynthetic process	73	1	0.25	0.2198
18	GO:0006836	neurotransmitter transport	86	1	0.29	0.2537
19	GO:0042254	ribosome biogenesis	90	1	0.3	0.2638
20	GO:0045454	cell redox homeostasis	98	1	0.33	0.2836
21	GO:0046488	phosphatidylinositol metabolic process	103	1	0.35	0.2958
22	GO:0032259	methylation	108	1	0.37	0.3077
23	GO:0006886	intracellular protein transport	331	2	1.12	0.3092
24	GO:0007018	microtubule-based movement	119	1	0.4	0.3333
25	GO:0055085	transmembrane transport	1139	5	3.86	0.3420
26	GO:0007165	signal transduction	1420	7	4.81	0.3898
27	GO:0006629	lipid metabolic process	449	3	1.52	0.4217
28	GO:0005975	carbohydrate metabolic process	736	4	2.49	0.5220
29	GO:0008152	metabolic process	10111	29	34.24	0.5576
30	GO:0030001	metal ion transport	257	1	0.87	0.5850
31	GO:0006396	RNA processing	504	3	1.71	0.6832
32	GO:0015074	DNA integration	359	1	1.22	0.7086
33	GO:0006811	ion transport	865	2	2.93	0.7921
34	GO:0035556	intracellular signal transduction	538	1	1.82	0.8442
35	GO:0006139	nucleobase-containing compound metabolic...	3383	11	11.46	0.8560
36	GO:0006412	translation	737	2	2.5	0.9031
37	GO:0055114	oxidation-reduction process	1668	3	5.65	0.9324
38	GO:0006468	protein phosphorylation	871	1	2.95	0.9524
39	GO:0006508	proteolysis	1020	1	3.45	0.9723
40	GO:0050794	regulation of cellular process	2335	8	7.91	1.0000
41	GO:0034637	cellular carbohydrate biosynthetic proce...	67	1	0.23	1.0000
42	GO:0019725	cellular homeostasis	118	1	0.4	1.0000
43	GO:0044249	cellular biosynthetic process	2768	4	9.37	1.0000
44	GO:0008380	RNA splicing	94	1	0.32	1.0000
45	GO:0046483	heterocycle metabolic process	3536	11	11.98	1.0000
46	GO:0051234	establishment of localization	2616	11	8.86	1.0000
47	GO:0046486	glycerolipid metabolic process	109	1	0.37	1.0000
48	GO:0015833	peptide transport	410	4	1.39	1.0000
49	GO:0010467	gene expression	2239	5	7.58	1.0000
50	GO:0019538	protein metabolic process	3136	4	10.62	1.0000

## Sheet: d)
	GO.ID	Term	Annotated	Significant	Expected	Fisher
1	GO:0005975	carbohydrate metabolic process	736	11	4.14	0.0030
2	GO:0006979	response to oxidative stress	52	3	0.29	0.0031
3	GO:0006508	proteolysis	1020	12	5.73	0.0055
4	GO:0019290	siderophore biosynthetic process	1	1	0.01	0.0056
5	GO:0009555	pollen development	1	1	0.01	0.0056
6	GO:0009408	response to heat	1	1	0.01	0.0056
7	GO:0035434	copper ion transmembrane transport	2	1	0.01	0.0112
8	GO:0000160	phosphorelay signal transduction system	30	2	0.17	0.0123
9	GO:0009269	response to desiccation	3	1	0.02	0.0168
10	GO:0055114	oxidation-reduction process	1668	16	9.38	0.0222
11	GO:0042744	hydrogen peroxide catabolic process	4	1	0.02	0.0223
12	GO:0015991	ATP hydrolysis coupled proton transport	45	2	0.25	0.0264
13	GO:0007160	cell-matrix adhesion	5	1	0.03	0.0278
14	GO:0006556	S-adenosylmethionine biosynthetic proces...	5	1	0.03	0.0278
15	GO:0006097	glyoxylate cycle	5	1	0.03	0.0278
16	GO:0009793	embryo development ending in seed dorman...	6	1	0.03	0.0333
17	GO:0007033	vacuole organization	6	1	0.03	0.0333
18	GO:0000387	spliceosomal snRNP assembly	10	1	0.06	0.0548
19	GO:0006420	arginyl-tRNA aminoacylation	10	1	0.06	0.0548
20	GO:0048034	heme O biosynthetic process	11	1	0.06	0.0602
21	GO:0006836	neurotransmitter transport	86	2	0.48	0.0844
22	GO:0006801	superoxide metabolic process	17	1	0.1	0.0914
23	GO:0006813	potassium ion transport	98	2	0.55	0.1051
24	GO:0000245	spliceosomal complex assembly	20	1	0.11	0.1067
25	GO:0006412	translation	737	8	4.14	0.1186
26	GO:0006072	glycerol-3-phosphate metabolic process	29	1	0.16	0.1510
27	GO:0006289	nucleotide-excision repair	30	1	0.17	0.1558
28	GO:0006414	translational elongation	54	1	0.3	0.2629
29	GO:0006814	sodium ion transport	64	1	0.36	0.3034
30	GO:0015031	protein transport	397	3	2.23	0.3109
31	GO:0019752	carboxylic acid metabolic process	607	5	3.41	0.3121
32	GO:0006096	glycolytic process	68	1	0.38	0.3190
33	GO:0006030	chitin metabolic process	71	1	0.4	0.3305
34	GO:0007264	small GTPase mediated signal transductio...	221	2	1.24	0.3536
35	GO:0055085	transmembrane transport	1139	9	6.4	0.3809
36	GO:0006139	nucleobase-containing compound metabolic...	3383	6	19.02	0.3812
37	GO:0016579	protein deubiquitination	105	1	0.59	0.4479
38	GO:0006457	protein folding	134	1	0.75	0.5318
39	GO:0006886	intracellular protein transport	331	2	1.86	0.5586
40	GO:0006511	ubiquitin-dependent protein catabolic pr...	153	1	0.86	0.5798
41	GO:0006810	transport	2608	17	14.66	0.6518
42	GO:0007186	G-protein coupled receptor signaling pat...	397	2	2.23	0.6580
43	GO:0006418	tRNA aminoacylation for protein translat...	212	2	1.19	0.6781
44	GO:0007017	microtubule-based process	217	1	1.22	0.7084
45	GO:0006811	ion transport	865	7	4.86	0.8685
46	GO:0006629	lipid metabolic process	449	1	2.52	0.9235
47	GO:0006468	protein phosphorylation	871	2	4.9	0.9605
48	GO:0008152	metabolic process	10111	58	56.85	0.9673
49	GO:0006351	transcription, DNA-templated	943	1	5.3	0.9959
50	GO:0019438	aromatic compound biosynthetic process	1353	2	7.61	1.0000
51	GO:0015672	monovalent inorganic cation transport	243	5	1.37	1.0000
52	GO:0090662	ATP hydrolysis coupled transmembrane tra...	45	2	0.25	1.0000
53	GO:0046907	intracellular transport	390	2	2.19	1.0000
54	GO:0050794	regulation of cellular process	2335	6	13.13	1.0000
55	GO:0043412	macromolecule modification	1603	3	9.01	1.0000
56	GO:0044260	cellular macromolecule metabolic process	4914	13	27.63	1.0000
57	GO:0006022	aminoglycan metabolic process	109	1	0.61	1.0000
58	GO:0044262	cellular carbohydrate metabolic process	123	1	0.69	1.0000
59	GO:0009790	embryo development	9	1	0.05	1.0000
60	GO:0009791	post-embryonic development	6	1	0.03	1.0000
61	GO:0044265	cellular macromolecule catabolic process	238	1	1.34	1.0000
62	GO:0034654	nucleobase-containing compound biosynthe...	1242	1	6.98	1.0000
63	GO:0044267	cellular protein metabolic process	2312	11	13	1.0000
64	GO:0006807	nitrogen compound metabolic process	6768	29	38.05	1.0000
65	GO:0006464	cellular protein modification process	1466	3	8.24	1.0000
66	GO:0072521	purine-containing compound metabolic pro...	278	1	1.56	1.0000
67	GO:0022414	reproductive process	18	1	0.1	1.0000
68	GO:0051716	cellular response to stimulus	1696	7	9.54	1.0000
69	GO:0006790	sulfur compound metabolic process	112	1	0.63	1.0000
70	GO:0009161	ribonucleoside monophosphate metabolic p...	144	1	0.81	1.0000
71	GO:0050896	response to stimulus	1832	12	10.3	1.0000
72	GO:0072524	pyridine-containing compound metabolic p...	110	1	0.62	1.0000
73	GO:0042743	hydrogen peroxide metabolic process	4	1	0.02	1.0000
74	GO:0006793	phosphorus metabolic process	1685	4	9.47	1.0000
75	GO:0015833	peptide transport	410	3	2.31	1.0000
76	GO:0006796	phosphate-containing compound metabolic ...	1676	4	9.42	1.0000
77	GO:0009167	purine ribonucleoside monophosphate meta...	137	1	0.77	1.0000
78	GO:0044257	cellular protein catabolic process	180	1	1.01	1.0000
79	GO:0046148	pigment biosynthetic process	37	1	0.21	1.0000
80	GO:1901700	response to oxygen-containing compound	18	1	0.1	1.0000
81	GO:0071702	organic substance transport	680	3	3.82	1.0000
82	GO:1901071	glucosamine-containing compound metaboli...	74	1	0.42	1.0000
83	GO:0071704	organic substance metabolic process	7832	42	44.03	1.0000

## Sheet: e)
	GO.ID	Term	Annotated	Significant	Expected	Fisher
1	GO:0006284	base-excision repair	17	1	0.01	0.014
2	GO:0009236	cobalamin biosynthetic process	21	1	0.02	0.017
3	GO:0000723	telomere maintenance	28	1	0.02	0.023
4	GO:0006072	glycerol-3-phosphate metabolic process	29	1	0.02	0.023
5	GO:0006289	nucleotide-excision repair	30	1	0.02	0.024
6	GO:0006836	neurotransmitter transport	86	1	0.07	0.068
7	GO:0006869	lipid transport	98	1	0.08	0.077
8	GO:0006281	DNA repair	260	3	0.21	0.137
9	GO:0055114	oxidation-reduction process	1668	3	1.36	0.146
10	GO:0015074	DNA integration	359	1	0.29	0.256
11	GO:0008152	metabolic process	10111	10	8.22	0.325
12	GO:0009056	catabolic process	536	1	0.44	0.359

## Sheet: f)
	GO.ID	Term	Annotated	Significant	Expected	Fisher
1	GO:0009664	plant-type cell wall organization	8	2	0.06	0.0016
2	GO:0006096	glycolytic process	68	4	0.52	0.0018
3	GO:0009294	DNA mediated transformation	1	1	0.01	0.0076
4	GO:0009408	response to heat	1	1	0.01	0.0076
5	GO:0009555	pollen development	1	1	0.01	0.0076
6	GO:0019290	siderophore biosynthetic process	1	1	0.01	0.0076
7	GO:0007264	small GTPase mediated signal transductio...	221	4	1.68	0.0215
8	GO:0009269	response to desiccation	3	1	0.02	0.0226
9	GO:0005978	glycogen biosynthetic process	33	2	0.25	0.0258
10	GO:0007160	cell-matrix adhesion	5	1	0.04	0.0374
11	GO:0006556	S-adenosylmethionine biosynthetic proces...	5	1	0.04	0.0374
12	GO:0006097	glyoxylate cycle	5	1	0.04	0.0374
13	GO:0009793	embryo development ending in seed dorman...	6	1	0.05	0.0447
14	GO:0019551	glutamate catabolic process to 2-oxoglut...	6	1	0.05	0.0447
15	GO:0055114	oxidation-reduction process	1668	20	12.65	0.0498
16	GO:0071918	urea transmembrane transport	9	1	0.07	0.0663
17	GO:0007268	chemical synaptic transmission	9	1	0.07	0.0663
18	GO:0000387	spliceosomal snRNP assembly	10	1	0.08	0.0733
19	GO:0006420	arginyl-tRNA aminoacylation	10	1	0.08	0.0733
20	GO:0048034	heme O biosynthetic process	11	1	0.08	0.0804
21	GO:0006368	transcription elongation from RNA polyme...	13	1	0.1	0.0943
22	GO:0006002	fructose 6-phosphate metabolic process	15	1	0.11	0.108
23	GO:0006801	superoxide metabolic process	17	1	0.13	0.1215
24	GO:0050909	sensory perception of taste	17	1	0.13	0.1215
25	GO:0006367	transcription initiation from RNA polyme...	18	1	0.14	0.1282
26	GO:0006751	glutathione catabolic process	18	1	0.14	0.1282
27	GO:0000245	spliceosomal complex assembly	20	1	0.15	0.1414
28	GO:0009236	cobalamin biosynthetic process	21	1	0.16	0.1479
29	GO:0006298	mismatch repair	25	1	0.19	0.1735
30	GO:0005975	carbohydrate metabolic process	736	13	5.58	0.1756
31	GO:0006888	ER to Golgi vesicle-mediated transport	28	1	0.21	0.1922
32	GO:0000723	telomere maintenance	28	1	0.21	0.1922
33	GO:0006072	glycerol-3-phosphate metabolic process	29	1	0.22	0.1983
34	GO:0000160	phosphorelay signal transduction system	30	1	0.23	0.2044
35	GO:0006289	nucleotide-excision repair	30	1	0.23	0.2044
36	GO:0007020	microtubule nucleation	34	1	0.26	0.2283
37	GO:0009072	aromatic amino acid family metabolic pro...	36	1	0.27	0.24
38	GO:0043087	regulation of GTPase activity	36	1	0.27	0.24
39	GO:0015991	ATP hydrolysis coupled proton transport	45	1	0.34	0.2905
40	GO:0016570	histone modification	45	1	0.34	0.2905
41	GO:0006182	cGMP biosynthetic process	45	1	0.34	0.2905
42	GO:0006979	response to oxidative stress	52	1	0.39	0.3275
43	GO:0006807	nitrogen compound metabolic process	6768	39	51.35	0.335
44	GO:0006810	transport	2608	18	19.79	0.3374
45	GO:0006414	translational elongation	54	1	0.41	0.3377
46	GO:0008272	sulfate transport	54	1	0.41	0.3377
47	GO:0019752	carboxylic acid metabolic process	607	9	4.61	0.3377
48	GO:0055085	transmembrane transport	1139	10	8.64	0.3685
49	GO:0007166	cell surface receptor signaling pathway	171	2	1.3	0.3732
50	GO:0006814	sodium ion transport	64	1	0.49	0.3864
51	GO:0006397	mRNA processing	142	2	1.08	0.39
52	GO:0015031	protein transport	397	2	3.01	0.3999
53	GO:0006030	chitin metabolic process	71	1	0.54	0.4184
54	GO:0016310	phosphorylation	1029	9	7.81	0.4379
55	GO:0006281	DNA repair	260	4	1.97	0.4551
56	GO:0042254	ribosome biogenesis	90	1	0.68	0.4972
57	GO:0006813	potassium ion transport	98	1	0.74	0.5271
58	GO:0007155	cell adhesion	106	2	0.8	0.5347
59	GO:0006811	ion transport	865	6	6.56	0.5456
60	GO:0016579	protein deubiquitination	105	1	0.8	0.5518
61	GO:0035023	regulation of Rho protein signal transdu...	108	1	0.82	0.562
62	GO:0007186	G-protein coupled receptor signaling pat...	397	3	3.01	0.5834
63	GO:0006508	proteolysis	1020	7	7.74	0.5873
64	GO:0035556	intracellular signal transduction	538	7	4.08	0.6055
65	GO:0008152	metabolic process	10111	74	76.71	0.623
66	GO:0006457	protein folding	134	1	1.02	0.6412
67	GO:0009058	biosynthetic process	2947	14	22.36	0.6602
68	GO:0008033	tRNA processing	144	1	1.09	0.6678
69	GO:0006511	ubiquitin-dependent protein catabolic pr...	153	1	1.16	0.69
70	GO:0007017	microtubule-based process	217	2	1.65	0.7044
71	GO:0015074	DNA integration	359	2	2.72	0.7605
72	GO:0006313	transposition, DNA-mediated	199	1	1.51	0.7825
73	GO:0006629	lipid metabolic process	449	2	3.41	0.8591
74	GO:0006468	protein phosphorylation	871	4	6.61	0.9032
75	GO:0006886	intracellular protein transport	331	1	2.51	0.9219
76	GO:0007165	signal transduction	1420	11	10.77	0.9444
77	GO:0006464	cellular protein modification process	1466	7	11.12	0.957
78	GO:0006412	translation	737	3	5.59	0.9739
79	GO:0006355	regulation of transcription, DNA-templat...	747	1	5.67	0.9971
80	GO:0007010	cytoskeleton organization	111	1	0.84	1
81	GO:0072521	purine-containing compound metabolic pro...	278	5	2.11	1
82	GO:0009790	embryo development	9	1	0.07	1
83	GO:0072522	purine-containing compound biosynthetic ...	167	1	1.27	1
84	GO:0034660	ncRNA metabolic process	417	2	3.16	1
85	GO:0009791	post-embryonic development	6	1	0.05	1
86	GO:0006103	2-oxoglutarate metabolic process	6	1	0.05	1
87	GO:0072524	pyridine-containing compound metabolic p...	110	4	0.83	1
88	GO:0009889	regulation of biosynthetic process	773	1	5.86	1
89	GO:0045229	external encapsulating structure organiz...	21	2	0.16	1
90	GO:0006106	fumarate metabolic process	6	1	0.05	1
91	GO:0016192	vesicle-mediated transport	296	1	2.25	1
92	GO:0006812	cation transport	413	3	3.13	1
93	GO:0015992	proton transport	85	1	0.64	1
94	GO:0000003	reproduction	18	1	0.14	1
95	GO:0031323	regulation of cellular metabolic process	806	1	6.11	1
96	GO:0006818	hydrogen transport	85	1	0.64	1
97	GO:0031326	regulation of cellular biosynthetic proc...	773	1	5.86	1
98	GO:0006418	tRNA aminoacylation for protein translat...	212	1	1.61	1
99	GO:0050789	regulation of biological process	2389	12	18.12	1
100	GO:0065003	macromolecular complex assembly	198	2	1.5	1
101	GO:0006766	vitamin metabolic process	45	1	0.34	1
102	GO:0006767	water-soluble vitamin metabolic process	45	1	0.34	1
103	GO:0006366	transcription from RNA polymerase II pro...	95	2	0.72	1
104	GO:0043170	macromolecule metabolic process	5825	30	44.19	1
105	GO:0055086	nucleobase-containing small molecule met...	474	5	3.6	1
106	GO:0065007	biological regulation	2472	13	18.75	1
107	GO:1902531	regulation of intracellular signal trans...	154	1	1.17	1
108	GO:0043171	peptide catabolic process	18	1	0.14	1
109	GO:0065008	regulation of biological quality	195	1	1.48	1
110	GO:0065009	regulation of molecular function	66	1	0.5	1
111	GO:0015672	monovalent inorganic cation transport	243	3	1.84	1
112	GO:0034654	nucleobase-containing compound biosynthe...	1242	4	9.42	1
