# Supplementary material for: Immune challenge reduces gut microbial diversity and triggers fertility-dependent gene expression changes in a social insect
Source: BMC Genomics. 2020 Nov 23;21:816. doi: 10.1186/s12864-020-07191-9 (PMC7682046; doi:10.1186/s12864-020-07191-9)
Supplement: Supplementary file 1 — Additional file 1. Additional methodological details, Figures S1 and S2 and Table S2. Description of additional supplementary tables (Tables S1, S3-S18) are also provided. [file 12864_2020_7191_MOESM1_ESM.zip › Table_S12.xlsx]

## Sheet: a)
	GO.ID	Term	Annotated	Significant	Expected	Fisher
1	GO:0007186	G-protein coupled receptor signaling pat...	397	15	5.11	0.00019
2	GO:0006147	guanine catabolic process	3	2	0.04	0.00049
3	GO:0009264	deoxyribonucleotide catabolic process	8	2	0.1	0.00438
4	GO:0005975	carbohydrate metabolic process	736	15	9.47	0.00770
5	GO:0016055	Wnt signaling pathway	32	3	0.41	0.00791
6	GO:0006508	proteolysis	1020	21	13.13	0.00857
7	GO:0044205	'de novo' UMP biosynthetic process	2	1	0.03	0.02558
8	GO:0007166	cell surface receptor signaling pathway	171	8	2.2	0.04179
9	GO:0015031	protein transport	397	5	5.11	0.05481
10	GO:0009081	branched-chain amino acid metabolic proc...	5	1	0.06	0.06272
11	GO:0006850	mitochondrial pyruvate transmembrane tra...	5	1	0.06	0.06272
12	GO:0006817	phosphate ion transport	6	1	0.08	0.07479
13	GO:0006171	cAMP biosynthetic process	6	1	0.08	0.07479
14	GO:0006166	purine ribonucleoside salvage	7	1	0.09	0.08670
15	GO:0043039	tRNA aminoacylation	219	2	2.82	0.08747
16	GO:0009395	phospholipid catabolic process	8	1	0.1	0.09846
17	GO:0006207	'de novo' pyrimidine nucleobase biosynth...	8	1	0.1	0.09846
18	GO:0006545	glycine biosynthetic process	10	1	0.13	0.12153
19	GO:0055085	transmembrane transport	1139	18	14.66	0.12680
20	GO:0015914	phospholipid transport	11	1	0.14	0.13285
21	GO:0006388	tRNA splicing, via endonucleolytic cleav...	12	1	0.15	0.14401
22	GO:0006376	mRNA splice site selection	12	1	0.15	0.14401
23	GO:0007172	signal complex assembly	12	1	0.15	0.14401
24	GO:0006396	RNA processing	504	8	6.49	0.15486
25	GO:0032259	methylation	108	3	1.39	0.16257
26	GO:0006021	inositol biosynthetic process	15	1	0.19	0.17667
27	GO:0006383	transcription from RNA polymerase III pr...	16	1	0.21	0.18728
28	GO:0050909	sensory perception of taste	17	1	0.22	0.19775
29	GO:0007018	microtubule-based movement	119	3	1.53	0.19783
30	GO:0048870	cell motility	19	1	0.24	0.21829
31	GO:0006094	gluconeogenesis	20	1	0.26	0.22836
32	GO:0006030	chitin metabolic process	71	2	0.91	0.23226
33	GO:0006139	nucleobase-containing compound metabolic...	3383	40	43.54	0.23796
34	GO:0009236	cobalamin biosynthetic process	21	1	0.27	0.23831
35	GO:0007165	signal transduction	1420	33	18.28	0.23876
36	GO:0008654	phospholipid biosynthetic process	73	2	0.94	0.24178
37	GO:0006313	transposition, DNA-mediated	199	4	2.56	0.25428
38	GO:0009166	nucleotide catabolic process	31	3	0.4	0.25559
39	GO:0006298	mismatch repair	25	1	0.32	0.27682
40	GO:0007169	transmembrane receptor protein tyrosine ...	25	1	0.32	0.27682
41	GO:0009058	biosynthetic process	2947	18	37.93	0.29314
42	GO:0006836	neurotransmitter transport	86	2	1.11	0.30382
43	GO:0042147	retrograde transport, endosome to Golgi	28	1	0.36	0.30444
44	GO:0006629	lipid metabolic process	449	6	5.78	0.33819
45	GO:0009401	phosphoenolpyruvate-dependent sugar phos...	32	1	0.41	0.33963
46	GO:0043401	steroid hormone mediated signaling pathw...	32	1	0.41	0.33963
47	GO:0045454	cell redox homeostasis	98	2	1.26	0.36029
48	GO:0035556	intracellular signal transduction	538	7	6.92	0.36046
49	GO:0006811	ion transport	865	11	11.13	0.37117
50	GO:0006413	translational initiation	39	1	0.5	0.39700
51	GO:0009165	nucleotide biosynthetic process	248	3	3.19	0.42116
52	GO:0001522	pseudouridine synthesis	45	1	0.58	0.44222
53	GO:0009116	nucleoside metabolic process	95	3	1.22	0.46106
54	GO:0006807	nitrogen compound metabolic process	6768	75	87.1	0.47337
55	GO:0006950	response to stress	401	4	5.16	0.48850
56	GO:0006810	transport	2608	37	33.56	0.49700
57	GO:0006887	exocytosis	54	1	0.69	0.50379
58	GO:0006520	cellular amino acid metabolic process	429	5	5.52	0.51176
59	GO:0007275	multicellular organism development	57	1	0.73	0.52277
60	GO:0006400	tRNA modification	62	1	0.8	0.55282
61	GO:0006397	mRNA processing	142	2	1.83	0.56992
62	GO:0006096	glycolytic process	68	1	0.88	0.58640
63	GO:0006511	ubiquitin-dependent protein catabolic pr...	153	2	1.97	0.58867
64	GO:0006812	cation transport	413	3	5.32	0.60601
65	GO:0003333	amino acid transmembrane transport	74	1	0.95	0.61747
66	GO:0007264	small GTPase mediated signal transductio...	221	2	2.84	0.64322
67	GO:0015074	DNA integration	359	4	4.62	0.68252
68	GO:0008152	metabolic process	10111	119	130.13	0.73559
69	GO:0016579	protein deubiquitination	105	1	1.35	0.74461
70	GO:0007155	cell adhesion	106	1	1.36	0.74792
71	GO:0006468	protein phosphorylation	871	9	11.21	0.79599
72	GO:0051056	regulation of small GTPase mediated sign...	142	1	1.83	0.84250
73	GO:0055114	oxidation-reduction process	1668	16	21.47	0.92042
74	GO:0006886	intracellular protein transport	331	2	4.26	0.92916
75	GO:0006418	tRNA aminoacylation for protein translat...	212	1	2.73	0.93709
76	GO:0016192	vesicle-mediated transport	296	3	3.81	0.93787
77	GO:0006281	DNA repair	260	2	3.35	0.95300
78	GO:0030001	metal ion transport	257	1	3.31	0.96521
79	GO:0006259	DNA metabolic process	1094	11	14.08	0.97147
80	GO:0006355	regulation of transcription, DNA-templat...	747	4	9.61	0.98831
81	GO:0046700	heterocycle catabolic process	112	5	1.44	1.00000
82	GO:0072521	purine-containing compound metabolic pro...	278	5	3.58	1.00000
83	GO:0072522	purine-containing compound biosynthetic ...	167	2	2.15	1.00000
84	GO:0034660	ncRNA metabolic process	417	4	5.37	1.00000
85	GO:0072523	purine-containing compound catabolic pro...	4	2	0.05	1.00000
86	GO:0072524	pyridine-containing compound metabolic p...	110	1	1.42	1.00000
87	GO:0009889	regulation of biosynthetic process	773	4	9.95	1.00000
88	GO:0007017	microtubule-based process	217	3	2.79	1.00000
89	GO:0072527	pyrimidine-containing compound metabolic...	52	1	0.67	1.00000
90	GO:0006412	translation	737	2	9.49	1.00000
91	GO:0072528	pyrimidine-containing compound biosynthe...	42	1	0.54	1.00000
92	GO:0019318	hexose metabolic process	83	1	1.07	1.00000
93	GO:0031323	regulation of cellular metabolic process	806	4	10.37	1.00000
94	GO:0016197	endosomal transport	28	1	0.36	1.00000
95	GO:0019319	hexose biosynthetic process	20	1	0.26	1.00000
96	GO:0070887	cellular response to chemical stimulus	58	1	0.75	1.00000
97	GO:0031326	regulation of cellular biosynthetic proc...	773	4	9.95	1.00000
98	GO:0043094	cellular metabolic compound salvage	16	1	0.21	1.00000
99	GO:0050789	regulation of biological process	2389	38	30.75	1.00000
100	GO:0065003	macromolecular complex assembly	198	2	2.55	1.00000
101	GO:0046165	alcohol biosynthetic process	16	1	0.21	1.00000
102	GO:0009070	serine family amino acid biosynthetic pr...	19	1	0.24	1.00000
103	GO:0006766	vitamin metabolic process	45	1	0.58	1.00000
104	GO:0006767	water-soluble vitamin metabolic process	45	1	0.58	1.00000
105	GO:0043170	macromolecule metabolic process	5825	58	74.97	1.00000
106	GO:0055086	nucleobase-containing small molecule met...	474	11	6.1	1.00000
107	GO:0065007	biological regulation	2472	38	31.81	1.00000
108	GO:1902531	regulation of intracellular signal trans...	154	1	1.98	1.00000
109	GO:0065008	regulation of biological quality	195	2	2.51	1.00000
110	GO:0043174	nucleoside salvage	7	1	0.09	1.00000
111	GO:0034654	nucleobase-containing compound biosynthe...	1242	9	15.98	1.00000
112	GO:0034655	nucleobase-containing compound catabolic...	93	3	1.2	1.00000
113	GO:0006040	amino sugar metabolic process	74	2	0.95	1.00000
114	GO:0008033	tRNA processing	144	2	1.85	1.00000
115	GO:0048583	regulation of response to stimulus	196	2	2.52	1.00000
116	GO:0008380	RNA splicing	94	2	1.21	1.00000
117	GO:0006848	pyruvate transport	5	1	0.06	1.00000
118	GO:0006753	nucleoside phosphate metabolic process	413	7	5.32	1.00000
119	GO:0006351	transcription, DNA-templated	943	5	12.14	1.00000
120	GO:1905114	cell surface receptor signaling pathway ...	32	3	0.41	1.00000
121	GO:0006757	ATP generation from ADP	68	1	0.88	1.00000
122	GO:1901135	carbohydrate derivative metabolic proces...	622	9	8.01	1.00000
123	GO:1901136	carbohydrate derivative catabolic proces...	56	2	0.72	1.00000
124	GO:1901137	carbohydrate derivative biosynthetic pro...	294	3	3.78	1.00000
125	GO:2001141	regulation of RNA biosynthetic process	747	4	9.61	1.00000
126	GO:0043603	cellular amide metabolic process	819	2	10.54	1.00000
127	GO:0006839	mitochondrial transport	20	1	0.26	1.00000
128	GO:0043604	amide biosynthetic process	779	2	10.03	1.00000
129	GO:0033993	response to lipid	32	1	0.41	1.00000
130	GO:1901071	glucosamine-containing compound metaboli...	74	2	0.95	1.00000
131	GO:1903825	organic acid transmembrane transport	80	2	1.03	1.00000
132	GO:0045184	establishment of protein localization	405	5	5.21	1.00000
133	GO:0046496	nicotinamide nucleotide metabolic proces...	101	1	1.3	1.00000
134	GO:1901475	pyruvate transmembrane transport	5	1	0.06	1.00000
135	GO:0003008	system process	93	1	1.2	1.00000
136	GO:0046098	guanine metabolic process	3	2	0.04	1.00000
137	GO:0046173	polyol biosynthetic process	15	1	0.19	1.00000
138	GO:0030163	protein catabolic process	190	2	2.45	1.00000
139	GO:0032196	transposition	199	4	2.56	1.00000
140	GO:1903506	regulation of nucleic acid-templated tra...	747	4	9.61	1.00000
141	GO:0010467	gene expression	2239	15	28.82	1.00000
142	GO:0010468	regulation of gene expression	813	4	10.46	1.00000
143	GO:0034220	ion transmembrane transport	234	2	3.01	1.00000
144	GO:0034622	cellular macromolecular complex assembly	161	2	2.07	1.00000
145	GO:0009755	hormone-mediated signaling pathway	32	1	0.41	1.00000
146	GO:0019222	regulation of metabolic process	853	4	10.98	1.00000
147	GO:0071396	cellular response to lipid	32	1	0.41	1.00000
148	GO:0006725	cellular aromatic compound metabolic pro...	3525	41	45.37	1.00000
149	GO:0042451	purine nucleoside biosynthetic process	31	1	0.4	1.00000
150	GO:0043933	macromolecular complex subunit organizat...	237	2	3.05	1.00000
151	GO:0046128	purine ribonucleoside metabolic process	41	1	0.53	1.00000
152	GO:0046129	purine ribonucleoside biosynthetic proce...	31	1	0.4	1.00000
153	GO:0042455	ribonucleoside biosynthetic process	35	2	0.45	1.00000
154	GO:0034613	cellular protein localization	346	2	4.45	1.00000
155	GO:0044085	cellular component biogenesis	321	2	4.13	1.00000
156	GO:1901360	organic cyclic compound metabolic proces...	3565	41	45.88	1.00000
157	GO:1901361	organic cyclic compound catabolic proces...	114	5	1.47	1.00000
158	GO:1901362	organic cyclic compound biosynthetic pro...	1395	10	17.95	1.00000
159	GO:0046112	nucleobase biosynthetic process	15	1	0.19	1.00000
160	GO:0006310	DNA recombination	308	4	3.96	1.00000
161	GO:0048545	response to steroid hormone	32	1	0.41	1.00000
162	GO:0046113	nucleobase catabolic process	3	2	0.04	1.00000
163	GO:0006006	glucose metabolic process	31	1	0.4	1.00000
164	GO:0019219	regulation of nucleobase-containing comp...	755	4	9.72	1.00000
165	GO:0007267	cell-cell signaling	42	3	0.54	1.00000
166	GO:0071822	protein complex subunit organization	162	1	2.08	1.00000
167	GO:0008652	cellular amino acid biosynthetic process	103	1	1.33	1.00000
168	GO:0040011	locomotion	19	1	0.24	1.00000
169	GO:0034641	cellular nitrogen compound metabolic pro...	4129	42	53.14	1.00000
170	GO:0048856	anatomical structure development	58	1	0.75	1.00000
171	GO:0071826	ribonucleoprotein complex subunit organi...	46	1	0.59	1.00000
172	GO:0042886	amide transport	420	5	5.41	1.00000
173	GO:0034645	cellular macromolecule biosynthetic proc...	2063	7	26.55	1.00000
174	GO:0046942	carboxylic acid transport	120	2	1.54	1.00000
175	GO:0010876	lipid localization	103	1	1.33	1.00000
176	GO:0051716	cellular response to stimulus	1696	35	21.83	1.00000
177	GO:0033554	cellular response to stress	275	2	3.54	1.00000
178	GO:0000245	spliceosomal complex assembly	20	1	0.26	1.00000
179	GO:0009725	response to hormone	36	1	0.46	1.00000
180	GO:0034637	cellular carbohydrate biosynthetic proce...	67	1	0.86	1.00000
181	GO:0046058	cAMP metabolic process	6	1	0.08	1.00000
182	GO:0046131	pyrimidine ribonucleoside metabolic proc...	19	1	0.24	1.00000
183	GO:0019637	organophosphate metabolic process	648	10	8.34	1.00000
184	GO:0052652	cyclic purine nucleotide metabolic proce...	51	1	0.66	1.00000
185	GO:0046132	pyrimidine ribonucleoside biosynthetic p...	18	1	0.23	1.00000
186	GO:0006732	coenzyme metabolic process	194	1	2.5	1.00000
187	GO:0006733	oxidoreduction coenzyme metabolic proces...	118	1	1.52	1.00000
188	GO:0071840	cellular component organization or bioge...	698	2	8.98	1.00000
189	GO:0046134	pyrimidine nucleoside biosynthetic proce...	18	1	0.23	1.00000
190	GO:1901292	nucleoside phosphate catabolic process	35	3	0.45	1.00000

## Sheet: b)
	GO.ID	Term	Annotated	Significant	Expected	Fisher
1	GO:0003333	amino acid transmembrane transport	74	1	0.02	0.02
2	GO:0035556	intracellular signal transduction	538	1	0.15	0.14
3	GO:0007165	signal transduction	1420	2	0.38	0.17
4	GO:0006508	proteolysis	1020	1	0.28	0.25

## Sheet: c)
	GO.ID	Term	Annotated	Significant	Expected	Fisher
1	GO:0032981	mitochondrial respiratory chain complex ...	1	1	0.01	0.0054
2	GO:0007165	signal transduction	1420	15	7.6	0.0315
3	GO:0097428	protein maturation by iron-sulfur cluste...	7	1	0.04	0.0369
4	GO:0051205	protein insertion into membrane	8	1	0.04	0.042
5	GO:0009395	phospholipid catabolic process	8	1	0.04	0.042
6	GO:0006811	ion transport	865	8	4.63	0.0473
7	GO:0006177	GMP biosynthetic process	10	1	0.05	0.0523
8	GO:0030488	tRNA methylation	12	1	0.06	0.0624
9	GO:0007172	signal complex assembly	12	1	0.06	0.0624
10	GO:0006952	defense response	13	1	0.07	0.0674
11	GO:0009312	oligosaccharide biosynthetic process	14	1	0.07	0.0724
12	GO:0051259	protein oligomerization	34	2	0.18	0.0765
13	GO:0006021	inositol biosynthetic process	15	1	0.08	0.0774
14	GO:0006313	transposition, DNA-mediated	199	3	1.06	0.0909
15	GO:0006468	protein phosphorylation	871	8	4.66	0.0934
16	GO:0051260	protein homooligomerization	19	1	0.1	0.097
17	GO:0006094	gluconeogenesis	20	1	0.11	0.1018
18	GO:0007205	protein kinase C-activating G-protein co...	22	1	0.12	0.1114
19	GO:0006730	one-carbon metabolic process	25	1	0.13	0.1256
20	GO:0007156	homophilic cell adhesion via plasma memb...	27	1	0.14	0.135
21	GO:0007186	G-protein coupled receptor signaling pat...	397	5	2.12	0.1372
22	GO:0006888	ER to Golgi vesicle-mediated transport	28	1	0.15	0.1396
23	GO:0042147	retrograde transport, endosome to Golgi	28	1	0.15	0.1396
24	GO:0043401	steroid hormone mediated signaling pathw...	32	1	0.17	0.1579
25	GO:0006479	protein methylation	36	1	0.19	0.1758
26	GO:0043087	regulation of GTPase activity	36	1	0.19	0.1758
27	GO:0070588	calcium ion transmembrane transport	40	1	0.21	0.1934
28	GO:0008299	isoprenoid biosynthetic process	41	1	0.22	0.1977
29	GO:0055085	transmembrane transport	1139	8	6.1	0.2116
30	GO:0048193	Golgi vesicle transport	73	2	0.39	0.2127
31	GO:0006182	cGMP biosynthetic process	45	1	0.24	0.2148
32	GO:0006400	tRNA modification	62	2	0.33	0.2332
33	GO:0006979	response to oxidative stress	52	1	0.28	0.2438
34	GO:0006414	translational elongation	54	1	0.29	0.2519
35	GO:0015031	protein transport	397	3	2.12	0.298
36	GO:0006261	DNA-dependent DNA replication	68	1	0.36	0.3063
37	GO:0006812	cation transport	413	3	2.21	0.3095
38	GO:0008654	phospholipid biosynthetic process	73	1	0.39	0.3247
39	GO:0007155	cell adhesion	106	2	0.57	0.3432
40	GO:0042254	ribosome biogenesis	90	1	0.48	0.3839
41	GO:0006813	potassium ion transport	98	1	0.52	0.41
42	GO:0046488	phosphatidylinositol metabolic process	103	1	0.55	0.4257
43	GO:0006470	protein dephosphorylation	107	1	0.57	0.438
44	GO:0006886	intracellular protein transport	331	2	1.77	0.5318
45	GO:0035556	intracellular signal transduction	538	3	2.88	0.5535
46	GO:0007166	cell surface receptor signaling pathway	171	1	0.92	0.6026
47	GO:0008152	metabolic process	10111	45	54.11	0.6758
48	GO:0007017	microtubule-based process	217	1	1.16	0.6905
49	GO:0005975	carbohydrate metabolic process	736	5	3.94	0.7662
50	GO:0006355	regulation of transcription, DNA-templat...	747	3	4	0.7699
51	GO:0006396	RNA processing	504	3	2.7	0.8079
52	GO:0055114	oxidation-reduction process	1668	5	8.93	0.9527
53	GO:0019752	carboxylic acid metabolic process	607	1	3.25	0.9641
54	GO:0006412	translation	737	2	3.94	0.9757
55	GO:0006508	proteolysis	1020	2	5.46	0.9763
56	GO:0072657	protein localization to membrane	33	1	0.18	1
57	GO:0008213	protein alkylation	36	1	0.19	1
58	GO:0019438	aromatic compound biosynthetic process	1353	5	7.24	1
59	GO:0015672	monovalent inorganic cation transport	243	1	1.3	1
60	GO:0032196	transposition	199	3	1.06	1
61	GO:0046128	purine ribonucleoside metabolic process	41	1	0.22	1
62	GO:0050790	regulation of catalytic activity	63	1	0.34	1
63	GO:0046129	purine ribonucleoside biosynthetic proce...	31	1	0.17	1
64	GO:0046907	intracellular transport	390	3	2.09	1
65	GO:0098609	cell-cell adhesion	27	1	0.14	1
66	GO:0019219	regulation of nucleobase-containing comp...	755	3	4.04	1
67	GO:0050794	regulation of cellular process	2335	17	12.5	1
68	GO:0043412	macromolecule modification	1603	12	8.58	1
69	GO:0043414	macromolecule methylation	71	2	0.38	1
70	GO:0006020	inositol metabolic process	17	1	0.09	1
71	GO:0044260	cellular macromolecule metabolic process	4914	22	26.3	1
72	GO:0044262	cellular carbohydrate metabolic process	123	1	0.66	1
73	GO:0071495	cellular response to endogenous stimulus	49	1	0.26	1
74	GO:1901615	organic hydroxy compound metabolic proce...	60	1	0.32	1
75	GO:0070271	protein complex biogenesis	135	4	0.72	1
76	GO:1901617	organic hydroxy compound biosynthetic pr...	25	1	0.13	1
77	GO:0034654	nucleobase-containing compound biosynthe...	1242	5	6.65	1
78	GO:0006351	transcription, DNA-templated	943	3	5.05	1
79	GO:0044267	cellular protein metabolic process	2312	12	12.37	1

## Sheet: d)
	GO.ID	Term	Annotated	Significant	Expected	Fisher
1	GO:0005975	carbohydrate metabolic process	736	11	4.14	0.0030
2	GO:0006979	response to oxidative stress	52	3	0.29	0.0031
3	GO:0006508	proteolysis	1020	12	5.73	0.0055
4	GO:0019290	siderophore biosynthetic process	1	1	0.01	0.0056
5	GO:0009555	pollen development	1	1	0.01	0.0056
6	GO:0009408	response to heat	1	1	0.01	0.0056
7	GO:0035434	copper ion transmembrane transport	2	1	0.01	0.0112
8	GO:0000160	phosphorelay signal transduction system	30	2	0.17	0.0123
9	GO:0009269	response to desiccation	3	1	0.02	0.0168
10	GO:0055114	oxidation-reduction process	1668	16	9.38	0.0222
11	GO:0042744	hydrogen peroxide catabolic process	4	1	0.02	0.0223
12	GO:0015991	ATP hydrolysis coupled proton transport	45	2	0.25	0.0264
13	GO:0007160	cell-matrix adhesion	5	1	0.03	0.0278
14	GO:0006556	S-adenosylmethionine biosynthetic proces...	5	1	0.03	0.0278
15	GO:0006097	glyoxylate cycle	5	1	0.03	0.0278
16	GO:0009793	embryo development ending in seed dorman...	6	1	0.03	0.0333
17	GO:0007033	vacuole organization	6	1	0.03	0.0333
18	GO:0000387	spliceosomal snRNP assembly	10	1	0.06	0.0548
19	GO:0006420	arginyl-tRNA aminoacylation	10	1	0.06	0.0548
20	GO:0048034	heme O biosynthetic process	11	1	0.06	0.0602
21	GO:0006836	neurotransmitter transport	86	2	0.48	0.0844
22	GO:0006801	superoxide metabolic process	17	1	0.1	0.0914
23	GO:0006813	potassium ion transport	98	2	0.55	0.1051
24	GO:0000245	spliceosomal complex assembly	20	1	0.11	0.1067
25	GO:0006412	translation	737	8	4.14	0.1186
26	GO:0006072	glycerol-3-phosphate metabolic process	29	1	0.16	0.1510
27	GO:0006289	nucleotide-excision repair	30	1	0.17	0.1558
28	GO:0006414	translational elongation	54	1	0.3	0.2629
29	GO:0006814	sodium ion transport	64	1	0.36	0.3034
30	GO:0015031	protein transport	397	3	2.23	0.3109
31	GO:0019752	carboxylic acid metabolic process	607	5	3.41	0.3121
32	GO:0006096	glycolytic process	68	1	0.38	0.3190
33	GO:0006030	chitin metabolic process	71	1	0.4	0.3305
34	GO:0007264	small GTPase mediated signal transductio...	221	2	1.24	0.3536
35	GO:0055085	transmembrane transport	1139	9	6.4	0.3809
36	GO:0006139	nucleobase-containing compound metabolic...	3383	6	19.02	0.3812
37	GO:0016579	protein deubiquitination	105	1	0.59	0.4479
38	GO:0006457	protein folding	134	1	0.75	0.5318
39	GO:0006886	intracellular protein transport	331	2	1.86	0.5586
40	GO:0006511	ubiquitin-dependent protein catabolic pr...	153	1	0.86	0.5798
41	GO:0006810	transport	2608	17	14.66	0.6518
42	GO:0007186	G-protein coupled receptor signaling pat...	397	2	2.23	0.6580
43	GO:0006418	tRNA aminoacylation for protein translat...	212	2	1.19	0.6781
44	GO:0007017	microtubule-based process	217	1	1.22	0.7084
45	GO:0006811	ion transport	865	7	4.86	0.8685
46	GO:0006629	lipid metabolic process	449	1	2.52	0.9235
47	GO:0006468	protein phosphorylation	871	2	4.9	0.9605
48	GO:0008152	metabolic process	10111	58	56.85	0.9673
49	GO:0006351	transcription, DNA-templated	943	1	5.3	0.9959
50	GO:0019438	aromatic compound biosynthetic process	1353	2	7.61	1.0000
51	GO:0015672	monovalent inorganic cation transport	243	5	1.37	1.0000
52	GO:0090662	ATP hydrolysis coupled transmembrane tra...	45	2	0.25	1.0000
53	GO:0046907	intracellular transport	390	2	2.19	1.0000
54	GO:0050794	regulation of cellular process	2335	6	13.13	1.0000
55	GO:0043412	macromolecule modification	1603	3	9.01	1.0000
56	GO:0044260	cellular macromolecule metabolic process	4914	13	27.63	1.0000
57	GO:0006022	aminoglycan metabolic process	109	1	0.61	1.0000
58	GO:0044262	cellular carbohydrate metabolic process	123	1	0.69	1.0000
59	GO:0009790	embryo development	9	1	0.05	1.0000
60	GO:0009791	post-embryonic development	6	1	0.03	1.0000
61	GO:0044265	cellular macromolecule catabolic process	238	1	1.34	1.0000
62	GO:0034654	nucleobase-containing compound biosynthe...	1242	1	6.98	1.0000
63	GO:0044267	cellular protein metabolic process	2312	11	13	1.0000
64	GO:0006807	nitrogen compound metabolic process	6768	29	38.05	1.0000
65	GO:0006464	cellular protein modification process	1466	3	8.24	1.0000
66	GO:0072521	purine-containing compound metabolic pro...	278	1	1.56	1.0000
67	GO:0022414	reproductive process	18	1	0.1	1.0000
68	GO:0051716	cellular response to stimulus	1696	7	9.54	1.0000
69	GO:0006790	sulfur compound metabolic process	112	1	0.63	1.0000
70	GO:0009161	ribonucleoside monophosphate metabolic p...	144	1	0.81	1.0000
71	GO:0050896	response to stimulus	1832	12	10.3	1.0000
72	GO:0072524	pyridine-containing compound metabolic p...	110	1	0.62	1.0000
73	GO:0042743	hydrogen peroxide metabolic process	4	1	0.02	1.0000
74	GO:0006793	phosphorus metabolic process	1685	4	9.47	1.0000
75	GO:0015833	peptide transport	410	3	2.31	1.0000
76	GO:0006796	phosphate-containing compound metabolic ...	1676	4	9.42	1.0000
77	GO:0009167	purine ribonucleoside monophosphate meta...	137	1	0.77	1.0000
78	GO:0044257	cellular protein catabolic process	180	1	1.01	1.0000
79	GO:0046148	pigment biosynthetic process	37	1	0.21	1.0000
80	GO:1901700	response to oxygen-containing compound	18	1	0.1	1.0000
81	GO:0071702	organic substance transport	680	3	3.82	1.0000
82	GO:1901071	glucosamine-containing compound metaboli...	74	1	0.42	1.0000
83	GO:0071704	organic substance metabolic process	7832	42	44.03	1.0000

## Sheet: e)
	GO.ID	Term	Annotated	Significant	Expected	Fisher
1	GO:0006072	glycerol-3-phosphate metabolic process	29	2	0.03	0.0005
2	GO:0006096	glycolytic process	68	2	0.08	0.0027
3	GO:0060964	regulation of gene silencing by miRNA	7	1	0.01	0.008
4	GO:0006284	base-excision repair	17	1	0.02	0.0194
5	GO:0000723	telomere maintenance	28	1	0.03	0.0318
6	GO:0009056	catabolic process	536	3	0.62	0.0332
7	GO:0006289	nucleotide-excision repair	30	1	0.03	0.034
8	GO:0006836	neurotransmitter transport	86	1	0.1	0.0946
9	GO:0006869	lipid transport	98	1	0.11	0.1071
10	GO:0055114	oxidation-reduction process	1668	4	1.92	0.117
11	GO:0006281	DNA repair	260	3	0.3	0.1982
12	GO:0006313	transposition, DNA-mediated	199	1	0.23	0.2061
13	GO:0007264	small GTPase mediated signal transductio...	221	1	0.25	0.2263
14	GO:0015074	DNA integration	359	1	0.41	0.3421
15	GO:0008152	metabolic process	10111	14	11.64	0.4083
16	GO:0032200	telomere organization	28	1	0.03	1
17	GO:0050794	regulation of cellular process	2335	2	2.69	1

## Sheet: f)
	GO.ID	Term	Annotated	Significant	Expected	Fisher
1	GO:0009664	plant-type cell wall organization	8	2	0.04	0.00086
2	GO:0009294	DNA mediated transformation	1	1	0.01	0.00562
3	GO:0009236	cobalamin biosynthetic process	21	2	0.12	0.00612
4	GO:0015803	branched-chain amino acid transport	2	1	0.01	0.01121
5	GO:0005978	glycogen biosynthetic process	33	2	0.19	0.01473
6	GO:0019551	glutamate catabolic process to 2-oxoglut...	6	1	0.03	0.03327
7	GO:0071918	urea transmembrane transport	9	1	0.05	0.04949
8	GO:0007268	chemical synaptic transmission	9	1	0.05	0.04949
9	GO:0006368	transcription elongation from RNA polyme...	13	1	0.07	0.07070
10	GO:0006002	fructose 6-phosphate metabolic process	15	1	0.08	0.08113
11	GO:0050909	sensory perception of taste	17	1	0.1	0.09144
12	GO:0006801	superoxide metabolic process	17	1	0.1	0.09144
13	GO:0006367	transcription initiation from RNA polyme...	18	1	0.1	0.09656
14	GO:0006751	glutathione catabolic process	18	1	0.1	0.09656
15	GO:0009298	GDP-mannose biosynthetic process	18	1	0.1	0.09656
16	GO:0035023	regulation of Rho protein signal transdu...	108	2	0.61	0.12342
17	GO:0006298	mismatch repair	25	1	0.14	0.13157
18	GO:0000723	telomere maintenance	28	1	0.16	0.14616
19	GO:0006888	ER to Golgi vesicle-mediated transport	28	1	0.16	0.14616
20	GO:0006289	nucleotide-excision repair	30	1	0.17	0.15575
21	GO:0007020	microtubule nucleation	34	1	0.19	0.17462
22	GO:0043087	regulation of GTPase activity	36	1	0.2	0.18389
23	GO:0009072	aromatic amino acid family metabolic pro...	36	1	0.2	0.18389
24	GO:0007186	G-protein coupled receptor signaling pat...	397	4	2.23	0.18442
25	GO:0016570	histone modification	45	1	0.25	0.22438
26	GO:0006182	cGMP biosynthetic process	45	1	0.25	0.22438
27	GO:0007166	cell surface receptor signaling pathway	171	2	0.96	0.24990
28	GO:0006807	nitrogen compound metabolic process	6768	30	38.05	0.25722
29	GO:0008272	sulfate transport	54	1	0.3	0.26288
30	GO:0006814	sodium ion transport	64	1	0.36	0.30344
31	GO:0006313	transposition, DNA-mediated	199	2	1.12	0.30825
32	GO:0006281	DNA repair	260	4	1.46	0.31201
33	GO:0006096	glycolytic process	68	1	0.38	0.31905
34	GO:0005975	carbohydrate metabolic process	736	7	4.14	0.32307
35	GO:0007165	signal transduction	1420	11	7.98	0.34734
36	GO:0016310	phosphorylation	1029	5	5.79	0.35416
37	GO:0055114	oxidation-reduction process	1668	12	9.38	0.38439
38	GO:0006811	ion transport	865	5	4.86	0.39107
39	GO:0042254	ribosome biogenesis	90	1	0.51	0.39888
40	GO:0045454	cell redox homeostasis	98	1	0.55	0.42556
41	GO:0055085	transmembrane transport	1139	8	6.4	0.44046
42	GO:0007155	cell adhesion	106	1	0.6	0.45106
43	GO:0035556	intracellular signal transduction	538	4	3.02	0.50974
44	GO:0009058	biosynthetic process	2947	12	16.57	0.54349
45	GO:0006397	mRNA processing	142	1	0.8	0.55267
46	GO:0008033	tRNA processing	144	1	0.81	0.55773
47	GO:0015074	DNA integration	359	2	2.02	0.60306
48	GO:0006810	transport	2608	14	14.66	0.63188
49	GO:0008152	metabolic process	10111	51	56.85	0.66198
50	GO:0006629	lipid metabolic process	449	2	2.52	0.72327
51	GO:0006508	proteolysis	1020	4	5.73	0.83410
52	GO:0006886	intracellular protein transport	331	1	1.86	0.84854
53	GO:0006468	protein phosphorylation	871	3	4.9	0.87487
54	GO:0006355	regulation of transcription, DNA-templat...	747	2	4.2	0.92767
55	GO:0006464	cellular protein modification process	1466	5	8.24	0.95969
56	GO:0006412	translation	737	1	4.14	0.98592
57	GO:0031109	microtubule polymerization or depolymeri...	35	1	0.2	1.00000
58	GO:0051276	chromosome organization	176	2	0.99	1.00000
59	GO:0003008	system process	93	1	0.52	1.00000
60	GO:0072521	purine-containing compound metabolic pro...	278	2	1.56	1.00000
61	GO:0034660	ncRNA metabolic process	417	1	2.34	1.00000
62	GO:0016569	covalent chromatin modification	45	1	0.25	1.00000
63	GO:0072522	purine-containing compound biosynthetic ...	167	1	0.94	1.00000
64	GO:0051716	cellular response to stimulus	1696	15	9.54	1.00000
65	GO:0046907	intracellular transport	390	1	2.19	1.00000
66	GO:0009190	cyclic nucleotide biosynthetic process	85	1	0.48	1.00000
67	GO:0072524	pyridine-containing compound metabolic p...	110	1	0.62	1.00000
68	GO:0045229	external encapsulating structure organiz...	21	2	0.12	1.00000
69	GO:0009889	regulation of biosynthetic process	773	2	4.35	1.00000
70	GO:0006812	cation transport	413	1	2.32	1.00000
71	GO:0006259	DNA metabolic process	1094	8	6.15	1.00000
72	GO:0046578	regulation of Ras protein signal transdu...	123	2	0.69	1.00000
73	GO:0009199	ribonucleoside triphosphate metabolic pr...	139	1	0.78	1.00000
74	GO:0005976	polysaccharide metabolic process	43	2	0.24	1.00000
75	GO:0051186	cofactor metabolic process	251	1	1.41	1.00000
76	GO:0015840	urea transport	9	1	0.05	1.00000
77	GO:0006536	glutamate metabolic process	11	1	0.06	1.00000
78	GO:0005977	glycogen metabolic process	33	2	0.19	1.00000
79	GO:0019438	aromatic compound biosynthetic process	1353	8	7.61	1.00000
80	GO:0006163	purine nucleotide metabolic process	260	2	1.46	1.00000
81	GO:0006538	glutamate catabolic process	6	1	0.03	1.00000
82	GO:0006164	purine nucleotide biosynthetic process	155	1	0.87	1.00000
83	GO:0006165	nucleoside diphosphate phosphorylation	82	1	0.46	1.00000
