# Supplementary material for: Immune challenge reduces gut microbial diversity and triggers fertility-dependent gene expression changes in a social insect
Source: BMC Genomics. 2020 Nov 23;21:816. doi: 10.1186/s12864-020-07191-9 (PMC7682046; doi:10.1186/s12864-020-07191-9)
Supplement: Supplementary file 1 — Additional file 1. Additional methodological details, Figures S1 and S2 and Table S2. Description of additional supplementary tables (Tables S1, S3-S18) are also provided. [file 12864_2020_7191_MOESM1_ESM.zip › Table_S13.xlsx]

## Sheet: a)
Contig	Annotation	baseMean	log2FoldChange	lfcSE	stat	pvalue	padj
Contig72781	ref|XP_011176287.1| PREDICTED: anaphase-promoting complex subunit 7 [Solenopsis invicta]	713.300825818241	0.353585943730432	0.107631756942955	3.28514514464197	0.00101929848258945	0.0465916008585817
Contig92591	#N/A	66.2420699226511	0.434171781407981	0.116964264804968	3.71200368020045	0.000205624996791573	0.0114476734324897
Contig114164	ref|XP_011861228.1| PREDICTED: transcription elongation regulator 1 [Vollenhovia emeryi]	34.5417766812335	0.61108668027671	0.172563671512664	3.54122437776171	0.000398274728372918	0.0206893471672457
Contig19660	ref|XP_011167554.1| PREDICTED: myosin heavy chain, muscle isoform X12 [Solenopsis invicta]	29.2023778754391	0.618745743467818	0.186117953643505	3.32448176736877	0.000885830254311138	0.0412825092898339
Contig3154	ref|XP_012236310.1| PREDICTED: actin, indirect flight muscle-like [Bombus impatiens]	1913.32601709577	0.619207978551367	0.178049759242668	3.47772432372366	0.00050568971684286	0.0255005138903446
Contig18555	ref|XP_011706402.1| PREDICTED: glucose dehydrogenase [FAD, quinone]-like isoform X2 [Wasmannia auropunctata]	133.582754214244	0.651515943949457	0.164258004923563	3.96641822267741	7.2960792864549e-05	0.0045555197301733
Contig1653	ref|XP_009043798.1| hypothetical protein LOTGIDRAFT_227913 [Lottia gigantea]	570.136961935572	0.658513233385432	0.178183238495886	3.69570807526116	0.00021927481083674	0.012145383358212
Contig29679	ref|XP_011564910.1| PREDICTED: actin, alpha skeletal muscle, partial [Plutella xylostella]	365.350017176164	0.674314417571091	0.195234578691757	3.45386776302431	0.000552608270203106	0.0276200533268087
Contig41756	ref|XP_012224910.1| PREDICTED: coronin-6 isoform X1 [Linepithema humile]	20.6261617416524	0.698533541709717	0.212259232526264	3.29094538501775	0.000998512970527846	0.0458074309080107
Contig139276	ref|XP_012345672.1| PREDICTED: actin, clone 205-like isoform X1 [Apis florea]	371.735427818434	0.74387567189606	0.190034252747956	3.9144294312177	9.06182348688092e-05	0.00552376390520195
Contig31154	ref|XP_011164549.1| PREDICTED: 4-hydroxyphenylpyruvate dioxygenase [Solenopsis invicta]	26.5725945659468	0.771430651255994	0.236050830350637	3.26807005978368	0.00108283557608951	0.0491018672640305
Contig7637	#N/A	128.337790038345	0.952055277183858	0.285749386848507	3.33178414723458	0.000862911578219681	0.0403463988311404
Contig95910	ref|XP_015790323.1| PREDICTED: uncharacterized protein LOC107367154 [Tetranychus urticae]	8.62024100176991	0.981817199479911	0.285432058538265	3.43975797430718	0.000582234600305762	0.0288963829713394
Contig55949	ref|XP_011880332.1| PREDICTED: twitchin isoform X27 [Vollenhovia emeryi]	31.5700643676237	1.19092328691851	0.27050233238401	4.40263592710118	1.0694354488361e-05	0.000799936583452587
Contig149632	ref|XP_011864720.1| PREDICTED: major facilitator superfamily domain-containing protein 12-like [Vollenhovia emeryi]	0.783771783424565	10.0037916677037	2.95113087029712	3.38981634748597	0.000699394612346732	0.0339246002542932
Contig112326	#N/A	0.730635764891016	10.0110143942658	2.96378719397275	3.37777773472552	0.000730741188140222	0.0352153948365105
Contig25385	ref|XP_011174312.1| PREDICTED: uncharacterized protein LOC105206519 [Solenopsis invicta]	2.28349826529309	10.0116665720716	2.95012455430664	3.3936419929987	0.000689697926477944	0.0335348409902113
Contig46744	ref|XP_011866107.1| PREDICTED: succinyl-CoA ligase [ADP/GDP-forming] subunit alpha, mitochondrial isoform X3 [Vollenhovia emeryi]	0.715037550127993	10.0181039328012	2.9552951601176	3.38988269868874	0.000699225360821772	0.0339246002542932
Contig129193	#N/A	26.4507861040888	10.0216253450208	2.97131672864436	3.37278932548975	0.00074410863370911	0.0357012963046506
Contig65092	#N/A	0.492848602804677	10.0226129162336	2.96335309404179	3.38218652930202	0.00071911297774999	0.0347142146966657
Contig33503	ref|XP_011876720.1| PREDICTED: cytoplasmic dynein 2 heavy chain 1 [Vollenhovia emeryi]	1.00227158820971	10.02628904109	2.95550570300901	3.39241065611284	0.000692805217364872	0.0336627574958749
Contig83118	ref|XP_011696169.1| PREDICTED: leukotriene A-4 hydrolase [Wasmannia auropunctata]	1.81064236644995	10.0330157209275	2.9608126771989	3.3886019869448	0.000702498988616196	0.0340167921845451
Contig118430	ref|XP_011173487.1| PREDICTED: vacuolar protein sorting-associated protein 16 homolog [Solenopsis invicta]	4.67364545365502	10.0379774862639	2.94196424725011	3.41199846179181	0.000644884771410073	0.0316014850859506
Contig108495	#N/A	0.266540686850465	10.0399093990232	2.96499108954699	3.38615162602636	0.000708802085361979	0.0342515760107358
Contig14053	#N/A	1.12283429991903	10.0403712588534	2.96884959161478	3.38190634083026	0.00071984682977401	0.0347377723724653
Contig81240	#N/A	0.219643344664567	10.0438529865788	2.96535013787946	3.38707151586532	0.000706429704645065	0.0341486137452049
Contig122185	#N/A	13.2815691562304	10.0645039090804	2.95408381500548	3.4069798080735	0.000656859862020004	0.0321038837508961
Contig86824	#N/A	0.701451878407245	10.0669673456674	2.96122455171196	3.39959606908142	0.000674854678047898	0.0328696799186949
Contig137747	#N/A	9.80924089377633	10.0674986302639	2.97131978354704	3.38822454789625	0.000703466474513133	0.0340403090579733
Contig111642	#N/A	0.326564905261081	10.0776688258952	2.96087512000137	3.40361157342244	0.000665012473713836	0.0324350250253172
Contig87834	ref|XP_011860408.1| PREDICTED: ribosomal protein S6 kinase 2 beta [Vollenhovia emeryi]	1.50960775957089	10.0794612409638	2.9595952969299	3.40568903167929	0.000659973063046133	0.0322226032789321
Contig129875	#N/A	0.331985281261384	10.083150463722	2.96229059386749	3.40383569545675	0.000664467091227546	0.0324196155349373
Contig146379	#N/A	6.79454667638917	10.0909178798905	2.95922506917884	3.40998661608752	0.000649660675198522	0.0317850084568994
Contig60006	ref|XP_011689445.1| PREDICTED: LOW QUALITY PROTEIN: la-related protein 7 [Wasmannia auropunctata]	0.382827319142208	10.1050990301564	2.96168422932906	3.41194342397726	0.000645014989616775	0.0316014850859506
Contig129994	ref|XP_006622629.1| PREDICTED: 40S ribosomal protein S4-like [Apis dorsata]	0.548829582234063	10.1104161722444	2.81739755593005	3.5885656786221	0.000332502233661473	0.0175697711704058
Contig32216	#N/A	0.447033186362607	10.1156646775057	2.95974744710814	3.41774589159268	0.000631420287834727	0.0310322756209334
Contig47065	#N/A	0.452338236912813	10.1211001217459	2.96492863226041	3.41360665873084	0.000641090592396167	0.0314637643048979
Contig70276	#N/A	0.622804457014467	10.123841755152	2.9591403457195	3.42121040990723	0.000623430793498291	0.0306763471827468
Contig69597	#N/A	0.966199443293656	10.124030899255	2.95854376889941	3.42196421282662	0.000621704960226542	0.0306080298833205
Contig64504	ref|XP_011869290.1| PREDICTED: tyrosine-protein phosphatase 10D isoform X1 [Vollenhovia emeryi]	1.19218686422877	10.1261152488123	2.95505620645575	3.42670817113065	0.000610945270925931	0.0301834734076997
Contig135528	#N/A	0.388956087018551	10.1285693079019	2.96220006692843	3.41927252685684	0.00062788806102194	0.0308801598879976
Contig139974	ref|XP_011696328.1| PREDICTED: glutamate receptor ionotropic, kainate 2-like isoform X3 [Wasmannia auropunctata]	3.22373354571284	10.1288910361628	2.94644647193746	3.43766334553585	0.000586756701465175	0.0291003726384432
Contig73513	#N/A	8.39733084650273	10.1365310364497	2.97132312611311	3.41145362056587	0.000646174930985488	0.031647341151978
Contig135192	ref|XP_011699132.1| PREDICTED: uncharacterized protein LOC105456632 [Wasmannia auropunctata]	0.47672833095883	10.1372585228261	2.95542670424785	3.4300490376756	0.000603472176071435	0.0298874195802193
Contig96842	#N/A	0.410956455650475	10.1427979838665	2.96050741006136	3.42603364186692	0.000612464518381194	0.0302373861124066
Contig121486	#N/A	0.537397653771364	10.1459334894153	2.96430607411493	3.42270104224803	0.000620022284874204	0.0305358273913804
Contig69389	ref|XP_012526097.1| PREDICTED: Down syndrome cell adhesion molecule-like protein Dscam2 isoform X30 [Monomorium pharaonis]	0.704132871086857	10.1472735740269	2.63382238390915	3.8526795261593	0.000116832258884647	0.00693033068162218
Contig80639	#N/A	0.428377445475174	10.1480494250557	2.96360083346861	3.42422950839111	0.000616545275893618	0.0304069800516372
Contig10405	#N/A	0.821103295255145	10.148424816488	2.9585311984839	3.43022403200906	0.000603083090534241	0.0298786225256721
Contig136424	ref|XP_015185985.1| PREDICTED: uncharacterized protein LOC107071468 [Polistes dominula]	0.522753255541915	10.1538995000136	2.96082709921363	3.4294131875213	0.000604887904239934	0.029936548583324
Contig140654	ref|XP_011860074.1| PREDICTED: aminopeptidase N-like isoform X1 [Vollenhovia emeryi]	0.350672888299088	10.1541808995141	2.96338294165049	3.42655036471884	0.000611300384941192	0.0301904615487716
Contig134162	ref|XP_011644288.1| PREDICTED: acetyl-CoA acetyltransferase, cytosolic [Pogonomyrmex barbatus]	5.97219599490357	10.1568902695934	1.93195201366682	5.25732015999496	1.4616971761841e-07	1.37597219122774e-05
Contig111584	ref|XP_011697972.1| PREDICTED: carnitine O-palmitoyltransferase 1, muscle isoform isoform X1 [Wasmannia auropunctata]	8.39995135516828	10.1661720084795	2.94483599086033	3.4522031243952	0.000556028974142385	0.0277713771507234
Contig132141	#N/A	0.377937703595135	10.1713847049387	2.96199214274411	3.43396748362591	0.000594815545170237	0.0294793588516026
Contig32875	ref|XP_011169185.1| PREDICTED: protein lifeguard 1-like [Solenopsis invicta]	0.484833570944716	10.1924566661228	2.95978965827435	3.44364223235555	0.000573934621754921	0.0285446111404805
Contig78958	#N/A	17.9923488060842	10.2020118740318	2.95179463888229	3.45620651912791	0.000547835414506536	0.027421222381847
Contig56534	#N/A	0.161308338819465	10.204411439217	2.97042817755497	3.43533350387771	0.000591825004057034	0.0293414377537708
Contig134446	ref|XP_011860241.1| PREDICTED: syntaxin-binding protein 5 isoform X6 [Vollenhovia emeryi]	0.541251596268382	10.2112100011628	2.95514349612247	3.45540242447151	0.000549472035362633	0.0274827434267731
Contig51787	#N/A	0.480932942425117	10.2130412664462	2.95855420186674	3.45203791095059	0.000556369548727031	0.0277785682425736
Contig68861	ref|XP_011873718.1| PREDICTED: RNA-directed DNA polymerase from mobile element jockey-like [Vollenhovia emeryi]	0.545060389859937	10.2138021671305	2.95960087654538	3.45107417965513	0.000558360080885619	0.0278582642474913
Contig104199	#N/A	15.1224500905087	10.2138694770283	2.95689665255114	3.45425311642733	0.000551819197804573	0.0275903740949019
Contig81510	#N/A	0.282533993201316	10.2280462588698	2.96386421919719	3.45091593353768	0.000558687562535907	0.0278643703593471
Contig146031	#N/A	0.263789711408131	10.2302582356116	2.96458375495318	3.45082449383291	0.000558876873524489	0.0278643703593471
Contig134818	ref|XP_011866885.1| PREDICTED: sodium-independent sulfate anion transporter [Vollenhovia emeryi]	3.51683596869058	10.2313340968646	2.95348473664909	3.4641567535144	0.000531896465182637	0.0267076669654979
Contig15820	#N/A	0.617864745811584	10.2353542784443	2.96161627084747	3.4560028519547	0.000548249520226796	0.0274313075281464
Contig68569	#N/A	5.29001491379889	10.2582135480847	2.96379283885496	3.46117765506441	0.000537817768784861	0.026986095649332
Contig51566	#N/A	1.11794905219759	10.2590219814182	2.94653355861379	3.48172582369792	0.000498193508580979	0.0251674108623406
Contig100558	#N/A	0.219342631762141	10.2849792330887	2.96619888354948	3.46739367010389	0.000525531612855264	0.0264350446071948
Contig112835	ref|XP_011175740.1| PREDICTED: dynein heavy chain 1, axonemal-like [Solenopsis invicta]	0.60886972551608	10.2905979739378	2.9547289083377	3.48275537051796	0.000496281635648461	0.0250887678970378
Contig136507	ref|XP_012534315.1| PREDICTED: uncharacterized protein LOC105835508 isoform X1 [Monomorium pharaonis]	1.8629162558458	10.2954225918516	2.95538808909864	3.48361104581413	0.000494697850994403	0.0250176529176651
Contig114395	ref|XP_011687239.1| PREDICTED: uncharacterized protein LOC105449634 [Wasmannia auropunctata]	0.383649000181311	10.3204251439359	2.96224227920849	3.48399089985762	0.000493996283950639	0.0249911181286693
Contig97879	#N/A	54.4950881303616	10.3206504681571	2.41370423811541	4.27585546944033	1.90404724847919e-05	0.00134652734768951
Contig36306	#N/A	0.56073614177652	10.3215460109088	2.96216023833809	3.48446578862314	0.000493120498578124	0.0249646890317425
Contig145599	ref|XP_012059832.1| PREDICTED: protein smoothened [Atta cephalotes]	4.75403201470754	10.3221237132207	2.94620306790252	3.50353437129822	0.00045912739937498	0.0234453647088856
Contig32244	#N/A	0.351994007482617	10.3264045086763	2.96215658457808	3.48611027601944	0.000490098925535687	0.0248384174610531
Contig17532	ref|XP_011169209.1| PREDICTED: kinesin-like protein Klp10A isoform X3 [Solenopsis invicta]	1.65919784120948	10.326915725189	2.95630817738538	3.49317970439817	0.000477305188613615	0.0242421967058008
Contig86452	ref|XP_012539260.1| PREDICTED: uncharacterized protein LOC105838320 [Monomorium pharaonis]	1.94399838279595	10.3412899434842	2.95329783807932	3.50160752841972	0.000462460313018067	0.0236070284857348
Contig149495	#N/A	0.298717652449918	10.3531250094914	2.96565888626593	3.49100331715055	0.000481210278698525	0.0244317530539941
Contig93300	#N/A	0.818081096643892	10.3561993738364	2.9531453908322	3.5068369495069	0.000453466916300877	0.0231982313079526
Contig101017	#N/A	0.362175704939728	10.3651579323366	2.96217510147681	3.49917124317498	0.000466706741284515	0.0238065929325914
Contig68550	ref|XP_015596585.1| PREDICTED: uncharacterized protein LOC107268379 [Cephus cinctus]	39.1080959946782	10.3661756942539	2.96304376555141	3.49848888996237	0.000467902583092151	0.0238331763818211
Contig56323	#N/A	0.450630925165213	10.3724139138331	2.95851644487016	3.50595107619498	0.000454978841010944	0.023250323796862
Contig64937	#N/A	1.084768156133	10.3756031653677	2.95482378005397	3.51141182611511	0.000445733300342367	0.0228532289270144
Contig121206	ref|XP_012527420.1| PREDICTED: uncharacterized protein LOC105831671 [Monomorium pharaonis]	2.40263574044785	10.3770998718258	2.95297753741679	3.51411405618191	0.000441223318989833	0.0226703750193841
Contig123416	ref|XP_011172203.1| PREDICTED: adenosine 3'-phospho 5'-phosphosulfate transporter 1-like [Solenopsis invicta]	0.629883035535231	10.4000741075312	2.96180244066228	3.51140034350355	0.000445752556125407	0.0228532289270144
Contig110738	#N/A	0.583648831953688	10.4019879604449	2.95972723324702	3.51450898704378	0.000440567764136754	0.0226449266530487
Contig101792	#N/A	0.371555299135304	10.409103805052	2.96134138317831	3.51499623251145	0.000439760226937548	0.0226116451184843
Contig107172	#N/A	0.353747257170528	10.4133159954813	2.96349596663504	3.51386204426165	0.000441642115161113	0.0226836444732533
Contig79465	ref|XP_011684319.1| PREDICTED: uncharacterized protein LOC105447811 [Wasmannia auropunctata]	0.447449428539222	10.4227282319134	2.95892466197917	3.522471648515	0.000427542768781825	0.0220476316060458
Contig40306	ref|XP_011860484.1| PREDICTED: lipoyl synthase, organellar chromatophore-like [Vollenhovia emeryi]	1.12336199573375	10.4234719002108	2.94885760219297	3.5347491491143	0.000408162440604282	0.0211253217472759
Contig101571	ref|XP_011861844.1| PREDICTED: peroxisomal biogenesis factor 19 [Vollenhovia emeryi]	0.316050520422473	10.4278876570347	2.96306421766643	3.51929181786255	0.000432700478251202	0.0222973302244567
Contig86759	ref|XP_012537839.1| PREDICTED: uncharacterized protein LOC105837526 [Monomorium pharaonis]	0.294869953536055	10.4332791529406	2.9635892566522	3.52048757415409	0.000430754175137619	0.0222051341424371
Contig134118	ref|XP_012215102.1| PREDICTED: succinyl-CoA ligase [GDP-forming] subunit beta, mitochondrial [Linepithema humile]	0.265305780820721	10.4402064841474	2.96354799668662	3.52287410084806	0.000426894095887335	0.0220222179870729
Contig69855	#N/A	0.746892383164794	10.4530060807456	2.96234792298723	3.52862200946499	0.000417729332557539	0.0215730634146135
Contig31895	ref|XP_011867780.1| PREDICTED: cleft lip and palate transmembrane protein 1-like protein [Vollenhovia emeryi]	0.624252711900496	10.4534553922706	2.95625191896378	3.53605026865732	0.000406157400089436	0.0210446725927529
Contig9816	#N/A	0.420509288526438	10.4589219514842	2.95955259547534	3.5339537359377	0.000409392731435156	0.021173486373936
Contig145962	#N/A	0.393377804303323	10.4643111384232	2.96098448819701	3.53406482882155	0.000409220692680161	0.0211723384158289
Contig106247	ref|XP_011881376.1| PREDICTED: inosine-uridine preferring nucleoside hydrolase-like [Vollenhovia emeryi]	4.74833973959351	10.4650032397601	1.43680801777034	7.28350838130747	3.25248707072037e-13	8.29542717746526e-11
Contig134545	#N/A	0.451012904188955	10.4665226182462	2.95865965287969	3.53758926210354	0.000403797671442941	0.0209454477172809
Contig34923	#N/A	0.542202299612991	10.4716965312394	2.95939315248648	3.53846075586173	0.000402467101694836	0.0208840962424441
Contig118418	ref|XP_011161835.1| PREDICTED: uncharacterized protein C05D11.1-like isoform X2 [Solenopsis invicta]	1.72583397452965	10.4843684413637	2.95031962496166	3.5536381728471	0.000379941551890537	0.0198171286295597
Contig85197	#N/A	0.466494418239418	10.4882262454258	2.95727601907842	3.54658346997797	0.000390261090326125	0.0203103945781991
Contig63735	ref|XP_011859278.1| PREDICTED: cytochrome P450 4C1-like [Vollenhovia emeryi]	0.378290681158422	10.4976998710189	2.95900020587567	3.54771853350116	0.000388583240597018	0.0202305254777586
Contig77733	#N/A	0.281916909732816	10.5067046673784	2.9637948519932	3.54501751709047	0.000392586994955619	0.0204164021443666
Contig149622	ref|XP_011058645.1| PREDICTED: glucose dehydrogenase [FAD, quinone]-like isoform X1 [Acromyrmex echinatior]	0.805159570465248	10.5108755527603	2.96143138412043	3.54925513693175	0.000386322573211705	0.0201276624731174
Contig71137	#N/A	0.692842189063552	10.5243388195588	2.96070855557222	3.55466896589717	0.000378455252943871	0.019761489976057
Contig115740	#N/A	0.381650834628933	10.539616461895	2.96133091182528	3.55908095910791	0.000372154808424643	0.0194778393403563
Contig55087	ref|XP_011566844.1| PREDICTED: ATP-dependent DNA helicase srs2-like [Plutella xylostella]	0.713726120919409	10.5424643182967	2.96018477041847	3.56142103818957	0.000368853041595567	0.0193315386566501
Contig52270	ref|XP_015789038.1| PREDICTED: 60S ribosomal protein L26-like [Tetranychus urticae]	0.486516213057102	10.54812300613	2.95964325277437	3.56398461072704	0.000365267379189382	0.0191507179507689
Contig63451	#N/A	0.617498690813087	10.5499929645746	2.96259145600895	3.56106912519994	0.000369347822316879	0.0193502926399362
Contig46058	#N/A	0.279840304508039	10.550057013723	2.96802942386386	3.55456618081256	0.000378603214300557	0.01976191295568
Contig72029	#N/A	0.247280824928337	10.5532207190905	2.96482664707235	3.55947310764741	0.000371599580782182	0.0194610474298666
Contig101515	ref|XP_012523194.1| PREDICTED: uncharacterized protein LOC105829089 isoform X1 [Monomorium pharaonis]	3.53562838913628	10.5548940031421	2.95247519884855	3.57493062338286	0.000350320777698602	0.0184492265845991
Contig58568	ref|XP_012530732.1| PREDICTED: thyroid receptor-interacting protein 11 [Monomorium pharaonis]	0.383934634457499	10.5677143688773	2.96063608606003	3.56940672939666	0.000357790571505308	0.0187992949504752
Contig118367	ref|XP_015436399.1| PREDICTED: protein sprint [Dufourea novaeangliae]	0.462322648083867	10.5703838587045	2.96048840643248	3.57048648991071	0.000356318832984398	0.0187302016905493
Contig33993	#N/A	0.284955173628334	10.5764767283222	2.96100374659436	3.57192277804003	0.000354369912219618	0.018655516202271
Contig59823	ref|XP_011704430.1| PREDICTED: cytochrome P450 6B7-like isoform X2 [Wasmannia auropunctata]	0.405014320994186	10.5823501960375	2.96382253750843	3.57050736409263	0.000356290436854803	0.0187302016905493
Contig99159	#N/A	0.224204622398768	10.5887694730411	2.96959148484814	3.56573270332589	0.000362841043809822	0.0190447068971755
Contig16722	ref|XP_012525555.1| PREDICTED: uncharacterized protein LOC105830644 [Monomorium pharaonis]	6.31878155374294	10.5902805926714	2.95406880561313	3.58498101755396	0.000337102723026575	0.017792903793607
Contig45040	ref|XP_009016465.1| hypothetical protein HELRODRAFT_105094 [Helobdella robusta]	16.7483439101095	10.6083825874592	2.9564518769277	3.58821419359049	0.000332950711804453	0.0175868922339566
Contig11247	#N/A	1.10010498945777	10.6275437354494	2.96124956362179	3.5888713555271	0.000332112664134197	0.0175623215210216
Contig52562	#N/A	0.406261931674975	10.6350971507115	2.9621559260791	3.59032320246178	0.000330268184583297	0.0174713229790588
Contig139143	#N/A	0.532442503954027	10.6416845254307	2.96045358573027	3.59461285822039	0.000324874297627275	0.0172117598919539
Contig66507	#N/A	1.87307118312331	10.6451207733136	2.95684938162385	3.60015658540832	0.000318025604490126	0.0169059683362082
Contig69910	ref|XP_012529381.1| PREDICTED: transcription factor collier isoform X4 [Monomorium pharaonis]	0.751351168880833	10.6491235131041	2.96003070633653	3.59763954147756	0.000321118224451284	0.0170511242992458
Contig127398	#N/A	0.472122613155164	10.6550313310262	2.95983513198278	3.59987325506486	0.000318372326648065	0.0169180348395606
Contig145174	ref|XP_011862677.1| PREDICTED: alpha-2A adrenergic receptor [Vollenhovia emeryi]	0.285380735868532	10.6552786935263	2.96450473748068	3.59428627615603	0.000325282030157643	0.0172269021796044
Contig74644	ref|XP_012536200.1| PREDICTED: THAP domain-containing protein 1-like isoform X1 [Monomorium pharaonis]	0.253575996393024	10.6562420722517	2.96935130191185	3.58874413592981	0.000332274747064905	0.0175643190931649
Contig111660	ref|XP_011879955.1| PREDICTED: S-methyl-5'-thioadenosine phosphorylase-like [Vollenhovia emeryi]	0.92206416551487	10.6595717608681	2.96057305829174	3.60050961451993	0.000317594083870296	0.0168893832399779
Contig22322	ref|XP_011631935.1| PREDICTED: DNA (cytosine-5)-methyltransferase PliMCI-like [Pogonomyrmex barbatus]	3.01582018386786	10.6775634356899	2.95232250194549	3.61666566869089	0.000298422347402315	0.0159841479988267
Contig41336	ref|XP_793832.1| PREDICTED: 60S ribosomal protein L31 [Strongylocentrotus purpuratus]	0.236689842854242	10.6794992411837	2.9692294728006	3.59672411277486	0.000322249949430051	0.0171047900468136
Contig132894	#N/A	0.419779341492802	10.6882558479965	2.95969008424532	3.61127535105483	0.000304694950391686	0.0162646325672437
Contig130519	#N/A	0.373291638014623	10.6924505743127	2.958481545147	3.6141684209091	0.000301313155545123	0.0161145514530883
Contig126383	#N/A	0.358318544348832	10.6929599919235	2.9615767943094	3.61056313395951	0.000305532916844241	0.0163032041357027
Contig143916	#N/A	0.425356774938756	10.712252423307	2.96067474362212	3.61817941885825	0.000296682700302287	0.01590302560873
Contig24117	ref|XP_012538298.1| PREDICTED: jmjC domain-containing protein 4 [Monomorium pharaonis]	10.9024095911191	10.715984067424	2.48851212903445	4.30618116841641	1.66097040397194e-05	0.00118410764465198
Contig13143	ref|XP_015589970.1| PREDICTED: 40S ribosomal protein S6 [Cephus cinctus]	0.198217972010421	10.7178930760192	2.96935277972221	3.60950478811813	0.000306782111477409	0.0163636813912508
Contig102153	#N/A	0.294076485307876	10.7192110587363	2.96246756428319	3.61833870789737	0.000296500193942189	0.0158992743466602
Contig71881	#N/A	0.768282769765878	10.7307564913604	2.95548831212571	3.63078968958681	0.000282555361842042	0.015232439894008
Contig19702	ref|XP_011861774.1| PREDICTED: uncharacterized protein LOC105558604 [Vollenhovia emeryi]	0.396608956733944	10.7386585818602	2.96307866428387	3.62415575101027	0.00028990687184606	0.0155930610092245
Contig38872	ref|XP_017032609.1| PREDICTED: transketolase-like [Drosophila kikkawai]	0.568062032076648	10.7390284814396	2.9612744234941	3.6264887834233	0.000287301293157345	0.015464689835906
Contig42045	#N/A	0.300352556279399	10.746150902984	2.96935134446932	3.61902303107365	0.000295717322238172	0.0158633145331386
Contig47783	#N/A	0.300352556279399	10.746150902984	2.96935134446932	3.61902303107365	0.000295717322238172	0.0158633145331386
Contig74090	ref|XP_011859100.1| PREDICTED: uncharacterized protein LOC105556612 [Vollenhovia emeryi]	0.300352556279399	10.746150902984	2.96935134446932	3.61902303107365	0.000295717322238172	0.0158633145331386
Contig55100	ref|XP_011686532.1| PREDICTED: patched domain-containing protein 1-like, partial [Wasmannia auropunctata]	0.331485988564955	10.7583432377823	2.96354092192299	3.63023272538493	0.00028316578916313	0.0152595257480483
Contig123548	#N/A	0.859002638174008	10.7651200076381	2.9570002173727	3.64055435112648	0.000272051669470007	0.0147223610651488
Contig70385	#N/A	0.521947556082352	10.7758108818273	2.96242750970486	3.63749352398529	0.000275304112070009	0.0148812720440536
Contig43550	#N/A	0.351569352015596	10.7840418701945	2.96110285103993	3.64190047178105	0.000270632710919393	0.0146567995993781
Contig85816	#N/A	1.18270140827609	10.798182675653	2.96175752682058	3.64586991942069	0.000266488761583081	0.0144489879299327
Contig13100	ref|XP_011862336.1| PREDICTED: solute carrier organic anion transporter family member 3A1 [Vollenhovia emeryi]	0.677472402300582	10.805365789135	2.95462348976668	3.65710413748464	0.000255080767700629	0.013889074078534
Contig47969	#N/A	0.387663916326116	10.8102671190556	2.96271381111836	3.64877197334662	0.000263496851709302	0.0143032326761311
Contig74230	ref|XP_011874653.1| PREDICTED: Bardet-Biedl syndrome 5 protein homolog [Vollenhovia emeryi]	0.294521761422255	10.8308450518047	2.96923052609699	3.64769422805366	0.000264604272069397	0.014357830196079
Contig62265	#N/A	0.696369976915896	10.8462779832723	2.9595619949466	3.66482540382398	0.000247507371597097	0.0135288391042766
Contig94477	#N/A	0.277518960164585	10.852554129335	2.96374431343283	3.6617713883573	0.000250477331508102	0.0136653451294383
Contig157	#N/A	0.359033278477471	10.8572574256396	2.96399624741764	3.66304695395579	0.000249232831329549	0.0136073614251821
Contig72891	#N/A	0.482988408923141	10.8635375982418	2.95678029514279	3.67411052356094	0.000238679409234186	0.0130918806236657
Contig11296	#N/A	0.185732751554948	10.8740837388681	2.96971315024165	3.66166130825909	0.000250585003435138	0.0136653451294383
Contig38841	#N/A	0.185732751554948	10.8740837388681	2.96971315024165	3.66166130825909	0.000250585003435138	0.0136653451294383
Contig46590	#N/A	0.22184787077582	10.8905504422578	2.96943839297654	3.66754550894763	0.000244889974395708	0.0134169130330323
Contig83791	ref|XP_011705214.1| PREDICTED: cytochrome P450 6l1-like, partial [Wasmannia auropunctata]	0.319604197934718	10.8921025923954	2.96295446308783	3.67609517057653	0.000236831201119566	0.013005650301046
Contig123331	ref|XP_011159479.1| PREDICTED: D-beta-hydroxybutyrate dehydrogenase, mitochondrial [Solenopsis invicta]	0.410469853343417	10.9274649610582	2.96121075448901	3.69020170026496	0.00022407631147465	0.0123580447238226
Contig118788	ref|XP_011161572.1| PREDICTED: isocitrate dehydrogenase [NAD] subunit beta, mitochondrial [Solenopsis invicta]	0.447085240732655	10.934116825009	2.9588867325792	3.69534822155155	0.00021958562569799	0.0121530709574026
Contig110230	ref|XP_012539052.1| PREDICTED: glutamate receptor ionotropic, kainate 2 isoform X3 [Monomorium pharaonis]	0.638577666650245	10.9376498642715	2.96224941880179	3.69234602422362	0.000222194867950684	0.0122830470488372
Contig90476	#N/A	0.239619151749901	10.9469829144558	2.96923035022519	3.68680823757093	0.000227084344440194	0.0125092930278231
Contig29224	ref|XP_012527508.1| PREDICTED: inactive peptidyl-prolyl cis-trans isomerase FKBP6-like [Monomorium pharaonis]	0.641143744620394	10.9614267328914	2.95784268526173	3.70588564006793	0.000210653339158048	0.0116953575100255
Contig123907	ref|XP_012061964.1| PREDICTED: glutamate receptor ionotropic, NMDA 2B-like [Atta cephalotes]	0.542147497748661	10.9626508328049	2.95542562704887	3.70933064005121	0.000207807906681405	0.0115509967704022
Contig114028	#N/A	0.478170322477087	10.9661705848887	2.95940369191019	3.70553385969808	0.000210945945642078	0.0117070028599327
Contig78257	ref|XP_011167467.1| PREDICTED: TBC1 domain family member 4 isoform X1 [Solenopsis invicta]	0.622041270511785	10.9760659750837	2.96031621450083	3.70773430261216	0.000209121899742967	0.0116194640456083
Contig75600	ref|XP_011880898.1| PREDICTED: uncharacterized protein LOC105569228, partial [Vollenhovia emeryi]	0.516646622357682	10.9827903325349	2.96026870373896	3.7100653459813	0.000207205757672535	0.0115265952526993
Contig99180	#N/A	0.492961632750705	10.9901655136287	2.96260635485408	3.7096273339257	0.000207564545258036	0.0115420100556178
Contig71290	ref|XP_012532063.1| PREDICTED: uncharacterized protein LOC105834263 [Monomorium pharaonis]	0.349174247247439	10.9915372910627	2.96923042468401	3.70181350685588	0.000214063941362793	0.0118707192789398
Contig45691	#N/A	0.386383085285282	11.0091341911957	2.96341445176042	3.71501670468528	0.000203190270909263	0.0113210472037327
Contig77151	#N/A	0.461125515062566	11.0231028216968	2.96015175353991	3.7238303098869	0.000196222840967503	0.0109717842343432
Contig93192	#N/A	0.374591144666093	11.0254480289136	2.96114756134289	3.72337001129166	0.000196581094297177	0.0109831233218301
Contig92387	#N/A	0.394201403004085	11.0454335206146	2.96013148756866	3.73139962430752	0.000190418880424411	0.0106810704832584
Contig117456	#N/A	0.463308888548769	11.0504502459854	2.95832753947115	3.73537077911286	0.000187438810302777	0.0105380040058192
Contig46853	#N/A	0.431878300398745	11.0555420887245	2.95975090435369	3.73529477513198	0.000187495432108462	0.0105380040058192
Contig127369	#N/A	0.507227827256856	11.0557422017255	2.95866679819347	3.73673108728433	0.00018642811561061	0.0104863588580543
Contig47422	ref|XP_011049539.1| PREDICTED: protein wntless [Acromyrmex echinatior]	0.733497374802699	11.056241280267	2.9576763469465	3.73815116440358	0.000185378479953295	0.010431470761434
Contig130945	ref|XP_011693383.1| PREDICTED: tyrosine aminotransferase isoform X3 [Wasmannia auropunctata]	1.73835583027093	11.0606867984259	2.95173650170728	3.74717959818854	0.00017883404585432	0.0101115302829443
Contig73305	ref|XP_012249091.1| PREDICTED: probable proline--tRNA ligase, mitochondrial [Bombus impatiens]	0.536646337058487	11.061427609389	2.96156907927635	3.73498889044715	0.000187723474127333	0.0105466257350973
Contig79997	#N/A	0.314503909680613	11.0635421292758	2.96477156623931	3.7316676452444	0.000190216356620173	0.0106739477924387
Contig82051	ref|XP_017064326.1| PREDICTED: transcriptional repressor NrdR-like [Drosophila eugracilis]	0.611980674842172	11.0646529555014	2.95745232433541	3.74127855399589	0.00018308645825754	0.0103148194945836
Contig53048	#N/A	0.261114297509972	11.0689518259488	2.96935048121811	3.727735036993	0.00019320834770915	0.0108203566810383
Contig42160	ref|XP_011061698.1| PREDICTED: calcium uptake protein 1 homolog, mitochondrial-like isoform X3 [Acromyrmex echinatior]	1.01053164903253	11.0690345841413	2.95790016134461	3.74219344141405	0.000182421003096694	0.010281428190887
Contig136517	ref|XP_011161304.1| PREDICTED: ubiquitin carboxyl-terminal hydrolase 48-like isoform X1 [Solenopsis invicta]	5.81587439215032	11.0729234278956	2.94259992420932	3.76297278362465	0.00016790548070593	0.00958954757773069
Contig12702	#N/A	0.65477714397138	11.0851398759005	2.95590096066591	3.7501729670277	0.000176712635097396	0.0100076012831089
Contig23651	#N/A	0.678195202984459	11.0870555615895	2.95760466420104	3.7486604263875	0.000177781602532295	0.0100560476753425
Contig51071	ref|XP_011157926.1| PREDICTED: F-box/LRR-repeat protein 4-like [Solenopsis invicta]	0.766269686411883	11.0883112369228	2.96228717558499	3.74315877552727	0.000181721320724775	0.0102460803888462
Contig60492	#N/A	0.641233389840743	11.0942920584799	2.95946980391334	3.74874311736846	0.000177723005035343	0.0100560476753425
Contig23017	#N/A	0.880309923483406	11.0961354499188	2.95700657505865	3.75248927192485	0.000175087326889881	0.00992749359051343
Contig123048	#N/A	0.390736183879458	11.0975479701451	2.96371156312871	3.74447638839378	0.000180770375210016	0.0102046790675388
Contig53226	ref|XP_011566640.1| PREDICTED: uncharacterized protein LOC105396341 [Plutella xylostella]	0.662081106650302	11.106032628654	2.95707092023915	3.75575457208034	0.000172819990535597	0.00980963699631931
Contig78174	ref|XP_011859935.1| PREDICTED: putative uncharacterized protein DDB_G0287457, partial [Vollenhovia emeryi]	0.281665022468636	11.1067369796738	2.96256451101314	3.74902789066203	0.000177521344430168	0.0100493723573515
Contig75576	#N/A	0.439293356059796	11.1098367670708	2.96120624480168	3.75179431914741	0.000175573480215886	0.00994707539457257
Contig14027	#N/A	0.938816109630942	11.1197330982621	2.95757494554234	3.7597468544362	0.000170085375928135	0.00967883743959634
Contig114173	ref|XP_011162665.1| PREDICTED: carbonic anhydrase-related protein 10 [Solenopsis invicta]	0.826353975328575	11.1241060116372	2.95795493046953	3.76074222668142	0.000169409937671452	0.00965985309247907
Contig108590	ref|XP_011067034.1| PREDICTED: WD repeat-containing protein 6 isoform X1 [Acromyrmex echinatior]	2.4194859710592	11.1350830620562	2.95097633012872	3.77335560043972	0.000161066458739768	0.00922505367675438
Contig83058	ref|XP_011692840.1| PREDICTED: dystrobrevin beta-like isoform X4 [Wasmannia auropunctata]	2.3686838151327	11.1362589881446	2.73957623132409	4.0649567844886	4.8041362763934e-05	0.00313973193083052
Contig84482	ref|XP_011059082.1| PREDICTED: uncharacterized protein LOC105148835 [Acromyrmex echinatior]	0.804727517597407	11.1417219403051	2.95538759853343	3.76996978191085	0.000163267314360518	0.00933974968307616
Contig46578	ref|XP_004925487.1| PREDICTED: aminoacylase-1-like isoform X1 [Bombyx mori]	1.32394554451941	11.1877960417183	2.95689486002339	3.78362998054986	0.000154557549645215	0.00888105656454654
Contig130830	ref|XP_014487250.1| PREDICTED: uncharacterized protein LOC106751021, partial [Dinoponera quadriceps]	0.383735376602451	11.1942526613523	2.96379573861471	3.77699870321851	0.000158729557673003	0.00910597251746745
Contig113346	ref|XP_011697826.1| PREDICTED: excitatory amino acid transporter 3 [Wasmannia auropunctata]	0.541000756641632	11.1986656765686	2.95405891951981	3.79094188087116	0.00015007707274217	0.0086446963502855
Contig11039	ref|XP_011858988.1| PREDICTED: uncharacterized protein LOC105556501 [Vollenhovia emeryi]	2.43988871099106	11.2061860171435	2.95538656040385	3.79178350720124	0.000149569274143604	0.00861895992196933
Contig121681	ref|XP_011866858.1| PREDICTED: luc7-like protein 3 [Vollenhovia emeryi]	2.64008875215437	11.2080320018615	2.95859902867827	3.78829029997641	0.000151687547168485	0.00873034433900829
Contig140010	ref|XP_012215612.1| PREDICTED: uncharacterized protein LOC105668019, partial [Linepithema humile]	0.365590630054048	11.2200398412802	2.96323736931944	3.78641277862162	0.000152837708848513	0.00879295999477538
Contig2192	#N/A	19.3390610589161	11.2244758775699	2.9578711464573	3.79478189609905	0.000147773300625501	0.00852766807243994
Contig120204	#N/A	2.21789417039643	11.242221016051	2.94834856767051	3.81305695646884	0.000137258465105777	0.00800421351384687
Contig87328	ref|XP_009045737.1| hypothetical protein LOTGIDRAFT_137237 [Lottia gigantea]	0.377364285877893	11.2508596697478	2.96487498507163	3.79471637974508	0.000147812325654488	0.00852766807243994
Contig75444	ref|XP_012542890.1| PREDICTED: sorbitol dehydrogenase-like [Monomorium pharaonis]	0.667303368001988	11.2588408530756	2.95945742080046	3.80435980390973	0.000142171404467352	0.00825663499261138
Contig99144	#N/A	0.707911809290251	11.2680233154814	2.95469559265571	3.81359871503837	0.000136957784088665	0.0079899768861999
Contig86605	ref|XP_012235579.1| PREDICTED: putative nuclease HARBI1 [Linepithema humile]	0.910125453329105	11.2724940659363	2.94612118341435	3.82621534015525	0.000130128467429766	0.00761987652814905
Contig75581	ref|XP_014681608.1| PREDICTED: sodium-dependent phosphate transporter 1-like [Priapulus caudatus]	0.623260527910868	11.2761419575217	2.96353687281968	3.80496091037088	0.000141826586732901	0.00824338594224546
Contig138436	ref|XP_013786731.1| PREDICTED: ADP,ATP carrier protein-like, partial [Limulus polyphemus]	0.347607820835247	11.2858343332051	2.95828154705158	3.81499669781375	0.000136184754647437	0.0079481607919946
Contig120380	#N/A	0.364838900445741	11.2901166368594	2.96910927489626	3.80252647900736	0.000143227952638333	0.00830775042033602
Contig94777	ref|XP_011882029.1| PREDICTED: aminopeptidase N-like isoform X1 [Vollenhovia emeryi]	1.69692976945385	11.3057745323434	2.95802323053663	3.82207090722961	0.000132335622375971	0.00773629558744623
Contig66861	ref|XP_011870772.1| PREDICTED: thrombospondin type-1 domain-containing protein 4-like [Vollenhovia emeryi]	3.37288791417013	11.3263783431211	2.94577012935351	3.844963403715	0.000120570431263707	0.00713410394734843
Contig80716	ref|XP_011688222.1| PREDICTED: F-box/LRR-repeat protein 4-like [Wasmannia auropunctata]	0.324823753929235	11.3307082428304	2.96374152675772	3.82310945152698	0.000131779247671653	0.00770695875755859
Contig68470	ref|XP_011866550.1| PREDICTED: lysosomal-trafficking regulator isoform X5 [Vollenhovia emeryi]	7.06490822637573	11.3360794639982	2.95365943381676	3.83797784342033	0.000124051672213395	0.00730338713697336
Contig99542	ref|XP_012535551.1| PREDICTED: uncharacterized protein LOC105836216 [Monomorium pharaonis]	4.31412939731168	11.338781228384	2.00633386269041	5.65149272473482	1.59060420942648e-08	1.79081755362019e-06
Contig39457	#N/A	0.583802985452061	11.3432425412575	2.95803786128727	3.83471851043892	0.000125708175452931	0.00738715593063325
Contig73865	#N/A	0.478960389201499	11.3433644952847	2.96006246515684	3.83213686495082	0.000127035029540729	0.00745418129942541
Contig63237	ref|XP_011049392.1| PREDICTED: pyroglutamylated RFamide peptide receptor-like isoform X1 [Acromyrmex echinatior]	0.920592587977742	11.3442153291361	2.95491372137134	3.83910205130165	0.000123485100225634	0.00727609433135172
Contig51479	ref|XP_014478525.1| PREDICTED: uncharacterized protein LOC106746434 isoform X1 [Dinoponera quadriceps]	0.699532424796114	11.3477974726478	2.96008633844025	3.83360354233022	0.000126279610217687	0.0074141797417875
Contig92318	ref|XP_015931017.1| PREDICTED: elongation factor 2-like [Parasteatoda tepidariorum]	0.621404752807236	11.3506707363052	2.96892643513573	3.82315661377656	0.000131754034044448	0.00770695875755859
Contig27241	#N/A	0.573201173266587	11.3507419376945	2.95989301733338	3.83484871622845	0.000125641602562062	0.00738715593063325
Contig89063	#N/A	0.582940749235883	11.3511283492344	2.95770578629066	3.83781524242481	0.000124133821513435	0.007305179749431
Contig69849	ref|XP_003723356.2| PREDICTED: bis(5'-adenosyl)-triphosphatase [Strongylocentrotus purpuratus]	0.635350520088085	11.3618020795418	2.9538541721937	3.84643297103048	0.000119849898285105	0.00709741453394404
Contig61491	ref|XP_017023551.1| PREDICTED: cyclopentanol dehydrogenase-like [Drosophila kikkawai]	0.979419053154795	11.3726949143107	2.95884055093707	3.84363223314245	0.000121226631544969	0.00715790017007587
Contig60772	#N/A	0.666468285163082	11.3771056952859	2.9554485552494	3.8495360289991	0.000118341776272728	0.00701104317065313
Contig66462	ref|XP_011879931.1| PREDICTED: glutamate receptor ionotropic, kainate 2-like [Vollenhovia emeryi]	4.12363957379017	11.3774969555134	2.58295985037993	4.40482919385674	1.05867260659809e-05	0.000792305419992001
Contig119044	ref|XP_004213329.1| PREDICTED: histone-lysine N-methyltransferase SETMAR-like, partial [Hydra vulgaris]	0.628714868112135	11.3806824875149	2.95526848631141	3.85098089741402	0.000117645676120974	0.00697565299994343
Contig5976	#N/A	0.392177348797323	11.3869352164629	2.96077467685297	3.84593103470005	0.000120095541306968	0.00710898186009663
Contig35588	ref|XP_011874360.1| PREDICTED: uncharacterized protein CG5098 isoform X1 [Vollenhovia emeryi]	5.46338913228476	11.3904386160817	2.94617777849477	3.86617491287345	0.000110555661359349	0.00661074197337791
Contig115513	#N/A	0.289743336953239	11.3923522074343	2.96403267987697	3.84353124200614	0.000121276552277555	0.00715790017007587
Contig142957	#N/A	1.01726383377875	11.3941307050649	2.95174484782262	3.86013401987297	0.000113324853775203	0.00674777153977025
Contig88274	ref|XP_009064700.1| hypothetical protein LOTGIDRAFT_148309 [Lottia gigantea]	26.5418805809748	11.4077576048285	2.95491531904072	3.8606038999899	0.000113107132129435	0.00673764690071366
Contig43611	#N/A	0.524389007783132	11.4131040759783	2.95608552224043	3.86088426404126	0.000112977411844168	0.00673275806045781
Contig51878	#N/A	0.579744248332746	11.4160799967669	2.96013925864059	3.85660234174576	0.000114973973725484	0.00683732220769767
Contig82023	#N/A	0.468962173493331	11.4235180801714	2.95733446854644	3.86277514487098	0.000112106187327051	0.0066885440825217
Contig98019	ref|XP_011871575.1| PREDICTED: major facilitator superfamily domain-containing protein 6 [Vollenhovia emeryi]	2.34674565615353	11.4318548683393	2.94956959504399	3.87577051497536	0.000106287822489375	0.00638246434613079
Contig46051	#N/A	0.566426106758097	11.4328871210145	2.95732973289036	3.86594940491823	0.000110657878674148	0.00661405511126104
Contig11749	ref|XP_012248857.1| PREDICTED: uncharacterized protein LOC105681911 [Bombus impatiens]	0.567553184857316	11.4372878375339	2.96220081332246	3.86107781285282	0.000112887941573821	0.00673026475972838
Contig75048	#N/A	0.899668522203283	11.4376825105638	2.96044538095192	3.86350060168518	0.000111773617892945	0.00667509589493636
Contig139398	ref|XP_011157912.1| PREDICTED: methyltransferase-like protein 4 [Solenopsis invicta]	3.99557171702722	11.438162037093	2.52546740205875	4.52912677778721	5.92279548173794e-06	0.00046883654520063
Contig96163	#N/A	0.605268410300186	11.4391946193123	2.96058193813044	3.86383314441754	0.000111621482402583	0.00666882900593561
Contig44619	ref|XP_015594147.1| PREDICTED: uncharacterized protein LOC107267231 [Cephus cinctus]	1.22263146038711	11.4610187528721	2.44621187748996	4.68521098206431	2.79671690524782e-06	0.00023410409274929
Contig58118	ref|XP_011051284.1| PREDICTED: uncharacterized protein LOC105144216 [Acromyrmex echinatior]	0.679173920942942	11.4615179878659	2.69145382865435	4.25848582867807	2.05816264586629e-05	0.00144538870463703
Contig51994	ref|XP_011170893.1| PREDICTED: SCAN domain-containing protein 3-like [Solenopsis invicta]	0.536873168447228	11.4659113227572	2.96032961502759	3.87318738580747	0.000107421170137026	0.00643966443650885
Contig87318	ref|XP_013199906.1| PREDICTED: spermatogenesis-associated protein 20 isoform X4 [Amyelois transitella]	0.401081572788936	11.476934160861	2.96032922758253	3.87691141036815	0.00010579085544094	0.00635541262807757
Contig67821	ref|XP_012340548.1| PREDICTED: uncharacterized protein LOC105735132, partial [Apis florea]	0.677740499727888	11.4876678339647	2.95812674803622	3.88342651023689	0.0001029946711224	0.00620854865425841
Contig131963	ref|XP_011061859.1| PREDICTED: cubilin isoform X2 [Acromyrmex echinatior]	43.1311897511274	11.4889920893517	2.94102393678648	3.90645990522105	9.36581755820106e-05	0.00568454434502206
Contig79132	ref|XP_011874430.1| PREDICTED: potassium/sodium hyperpolarization-activated cyclic nucleotide-gated channel 1-like [Vollenhovia emeryi]	0.578362368359573	11.5124171548091	2.95690868461922	3.89339624003018	9.88504934755905e-05	0.00597658458563137
Contig79174	#N/A	0.772945495493151	11.5237514121128	2.95685930399075	3.89729446935795	9.72733147785637e-05	0.00588374467391555
Contig97390	ref|XP_011172194.1| PREDICTED: cholesterol desaturase daf-36 [Solenopsis invicta]	1.5641037143103	11.5324387951855	2.95463440362571	3.90316946862656	9.49411764261883e-05	0.00575994135057584
Contig109370	#N/A	6.69702817985254	11.541770981792	2.95383181701252	3.90738934942654	9.32987449516991e-05	0.00566759792151342
Contig145808	#N/A	0.450104299056093	11.5469295900205	2.95878358644132	3.90259349921182	9.51674572348511e-05	0.0057662419403571
Contig106341	#N/A	0.454950245563646	11.5534648557464	2.95714126347225	3.90697089735253	9.34604053999341e-05	0.00567497847090438
Contig65853	#N/A	0.737031969170407	11.5622024969508	2.95221748762376	3.9164467202778	8.98636645045389e-05	0.00548073521434559
Contig54665	ref|XP_011692056.1| PREDICTED: tyrosine-protein phosphatase non-receptor type 11-like [Wasmannia auropunctata]	0.502847639201934	11.5729642806465	2.960188751199	3.90953592940957	9.2473601118507e-05	0.00562472768714666
Contig41731	ref|XP_011697508.1| PREDICTED: lymphocyte cytosolic protein 2-like [Wasmannia auropunctata]	0.861128949013803	11.5794466014085	2.95664052144215	3.91642017940025	8.9873553519457e-05	0.00548073521434559
Contig107912	#N/A	0.405382595817593	11.6016422365445	2.95738993675247	3.92293288496287	8.74775258606673e-05	0.00535542113151417
Contig39674	ref|XP_011689154.1| PREDICTED: E3 ubiquitin-protein ligase UHRF1-like [Wasmannia auropunctata]	0.719703478484108	11.6059464107671	2.96884229705911	3.90924988581032	9.25831566728429e-05	0.00562896828244522
Contig120865	#N/A	0.306232865056712	11.6101111769791	2.96149227069039	3.92035842601492	8.84173664240268e-05	0.00540827213143538
Contig83198	ref|XP_011869793.1| PREDICTED: thioredoxin-related transmembrane protein 2 homolog [Vollenhovia emeryi]	3.48941546943183	11.6169834097902	2.12746113661954	5.4604914796466	4.74818278913895e-08	4.84757213552722e-06
Contig83786	#N/A	0.550405486093697	11.6392427741773	2.26799401442205	5.13195480242188	2.86748365630385e-07	2.62583822543594e-05
Contig148323	ref|XP_011704265.1| PREDICTED: tRNA pseudouridine synthase A, mitochondrial-like, partial [Wasmannia auropunctata]	0.887359467549987	11.6627380521202	2.9582433793766	3.94245386753066	8.06521669858727e-05	0.00496121429630076
Contig69782	ref|XP_011879409.1| PREDICTED: thyroid adenoma-associated protein homolog isoform X1 [Vollenhovia emeryi]	1.23170573808179	11.6641143684683	2.95373470532621	3.94893771178415	7.84987725668865e-05	0.00484774522175846
Contig29594	#N/A	0.459163362733935	11.68145101932	2.95666654757295	3.95088550953065	7.78625680868456e-05	0.00481266285344139
Contig88352	#N/A	0.593282702087634	11.684064976067	2.96902809096504	3.93531641267473	8.30871576252389e-05	0.00510433309172756
Contig86432	ref|XP_011862228.1| PREDICTED: DNA repair protein RAD51 homolog 4 [Vollenhovia emeryi]	0.680498079101443	11.6853999252491	2.95401692152323	3.9557660757148	7.62897841323778e-05	0.00472578589590205
Contig134879	#N/A	0.401181927842343	11.6875767852584	2.96394902735385	3.94324486602014	8.03865036641902e-05	0.00494918161579045
Contig105302	ref|XP_011635590.1| PREDICTED: condensin-2 complex subunit D3-like [Pogonomyrmex barbatus]	1.59028540234034	11.6990671645357	2.95351109162892	3.9610710105996	7.46143372193249e-05	0.00464235227040025
Contig106301	#N/A	1.29978853747979	11.7026324201091	2.17177844152618	5.38850197439352	7.10473825702012e-08	7.00054533822993e-06
Contig82538	#N/A	0.62791089933088	11.7026628380731	2.95460085175813	3.96082700345444	7.46906318796308e-05	0.00464505379079938
Contig104450	#N/A	0.525432209384932	11.710435282119	2.95710398478917	3.96010263499539	7.49175578039179e-05	0.00465506867415136
Contig43933	ref|XP_011860768.1| PREDICTED: UDP-N-acetylglucosamine--dolichyl-phosphate N-acetylglucosaminephosphotransferase [Vollenhovia emeryi]	0.470385677007736	11.7165773770464	2.96235779962494	3.95515267552414	7.648579150665e-05	0.00473377699628345
Contig44901	ref|XP_012542951.1| PREDICTED: elongation factor Tu, cyanelle-like [Monomorium pharaonis]	0.752124496358928	11.728434958782	2.95609433215011	3.96754421238355	7.26170436440249e-05	0.00453806741077832
Contig116306	ref|XP_011867770.1| PREDICTED: general transcription factor IIH subunit 2 [Vollenhovia emeryi]	3.69953324373539	11.7315955979588	2.95627133081232	3.96837579679644	7.23641563618467e-05	0.00452626746412566
Contig36109	ref|XP_011068973.1| PREDICTED: protein farnesyltransferase/geranylgeranyltransferase type-1 subunit alpha [Acromyrmex echinatior]	0.798919286084009	11.7395407153623	2.96909115765363	3.95391723999463	7.6882011792334e-05	0.00475621612093758
Contig49562	#N/A	0.444027761766427	11.7401144938641	2.95792971176734	3.96903092293206	7.21655174225444e-05	0.00451584194652491
Contig83220	#N/A	0.563391723076196	11.7437622396295	2.95971927711436	3.96786355058623	7.25198332460231e-05	0.00453399773370059
Contig55687	#N/A	0.292717273534477	11.7670409974332	2.96457544948118	3.96921623279736	7.21094237885116e-05	0.00451433108243036
Contig99517	ref|XP_011879875.1| PREDICTED: uncharacterized protein C11orf70 homolog [Vollenhovia emeryi]	2.42128582365657	11.7684579864553	2.31127780354481	5.09175399357272	3.5476621654735e-07	3.23402594190264e-05
Contig121423	ref|XP_011880363.1| PREDICTED: uncharacterized protein LOC105568904 [Vollenhovia emeryi]	10.2377711847276	11.7697373071949	2.95735671637221	3.97981658487005	6.8968458793058e-05	0.00433884074892374
Contig131326	#N/A	0.504637760140679	11.7865064012712	2.95623165547147	3.98700365022356	6.69129965177448e-05	0.00421704088713996
Contig136013	ref|XP_011868538.1| PREDICTED: vacuolar protein sorting-associated protein 72 homolog [Vollenhovia emeryi]	0.674068878796033	11.7934883055063	2.96882493051843	3.97244316573658	7.11392128657324e-05	0.00445754206664718
Contig92360	ref|XP_009024801.1| hypothetical protein HELRODRAFT_155141 [Helobdella robusta]	0.821186517497504	11.802652115786	2.96888924699171	3.97544372116451	7.02481553985836e-05	0.00440561633970425
Contig84354	#N/A	0.458281606740058	11.8073964592029	2.95692575005343	3.99313254957098	6.52060933080351e-05	0.00412049434979671
Contig61207	ref|XP_011881734.1| PREDICTED: ATP-binding cassette sub-family C member Sur [Vollenhovia emeryi]	1.09625735946566	11.809255448031	2.95920145937095	3.99068992434917	6.5881367371134e-05	0.00415573194885675
Contig85992	#N/A	0.778896310706665	11.8093873697879	2.95853981089472	3.99162699325532	6.56215319669873e-05	0.00414304093044656
Contig110341	ref|XP_011165057.1| PREDICTED: uncharacterized protein LOC105199598 [Solenopsis invicta]	1.38868692817635	11.8210738473797	2.954860403732	4.00055238902305	6.3194794202588e-05	0.00400234640808744
Contig65575	#N/A	0.409757765419406	11.8319293929613	2.96052472823796	3.9965649602945	6.42682516654206e-05	0.00406655729158103
Contig76723	ref|XP_011702375.1| PREDICTED: protein SPT2 homolog isoform X2 [Wasmannia auropunctata]	2.22788462417359	11.8390558844568	2.9531237418432	4.00899417681273	6.09779200486414e-05	0.00387409944654356
Contig115458	ref|XP_011684796.1| PREDICTED: uncharacterized protein KIAA1109 isoform X2 [Wasmannia auropunctata]	1.6973351287907	11.8424520044676	2.53731028901808	4.66732510238254	3.05146303792166e-06	0.000254974910035019
Contig110479	ref|XP_011629899.1| PREDICTED: uncharacterized protein LOC105422287 [Pogonomyrmex barbatus]	1.00826619838872	11.8461288716758	2.96101517207416	4.00069847105097	6.31557915240999e-05	0.0040016698990945
Contig111077	ref|XP_011860060.1| PREDICTED: transcriptional regulator ATRX [Vollenhovia emeryi]	1.34777778617208	11.8552552949671	2.95380707443053	4.01355098563865	5.98120755902146e-05	0.00380516291970759
Contig37677	ref|XP_011876001.1| PREDICTED: SWI/SNF-related matrix-associated actin-dependent regulator of chromatin subfamily A-like protein 1 [Vollenhovia emeryi]	1.7118854466344	11.8566842164241	2.95329361986716	4.01473261468578	5.95132240516685e-05	0.00379127142417881
Contig85411	#N/A	0.74745551285923	11.8599046352738	2.95113941858609	4.01875443788961	5.85066070742644e-05	0.00374063713111871
Contig77053	ref|XP_011691989.1| PREDICTED: protein lap4 isoform X2 [Wasmannia auropunctata]	0.64864978867198	11.8727137208641	2.95443801014562	4.01860309138078	5.85441936291056e-05	0.00374134732121743
Contig102497	ref|XP_015523501.1| PREDICTED: uncharacterized protein LOC107227008 [Neodiprion lecontei]	10.3652107344618	11.8753671261351	2.95785158893286	4.01486239896828	5.94804859976319e-05	0.00379089500676923
Contig89910	#N/A	0.497524109881212	11.8853895086265	2.956026677258	4.02073147717711	5.80177083461848e-05	0.00371442144820611
Contig149567	ref|XP_011685987.1| PREDICTED: conserved oligomeric Golgi complex subunit 5-like [Wasmannia auropunctata]	3.87772964870216	11.9057556694448	2.43730474949982	4.88480386865374	1.03531859614721e-06	9.03566471153873e-05
Contig68370	ref|XP_011698217.1| PREDICTED: glutamate receptor ionotropic, delta-2-like isoform X2 [Wasmannia auropunctata]	1.56917036510092	11.9086173679206	2.95888192116796	4.02470179114817	5.70475592227195e-05	0.00365562311813724
Contig96732	ref|XP_011868073.1| PREDICTED: dehydrogenase/reductase SDR family member on chromosome X-like [Vollenhovia emeryi]	1.24426319638506	11.9156672477968	2.95519133569474	4.0321136245466	5.52774481755076e-05	0.00355185884258967
Contig32879	#N/A	1.6533520098693	11.9207887537247	2.95847558631368	4.02936864136107	5.5926856644709e-05	0.00358869076445388
Contig32456	ref|XP_016968439.1| PREDICTED: probable NADP-dependent mannitol dehydrogenase [Drosophila biarmipes]	0.841886157745941	11.9209092212878	2.96882148116725	4.01536747726604	5.93532423713197e-05	0.00378620094236585
Contig73798	ref|XP_011165969.1| PREDICTED: cohesin subunit SA-2-like [Solenopsis invicta]	1.61843153726226	11.9365182041926	2.94648471629325	4.05110474124876	5.0976380502151e-05	0.003308594228669
Contig40395	#N/A	0.7279536406469	11.9414785838108	2.95619377712045	4.03947761348806	5.35703804962831e-05	0.00345316334533911
Contig34982	ref|XP_008209965.1| PREDICTED: 40S ribosomal protein S12 isoform X1 [Nasonia vitripennis]	0.652454213179892	11.9442313312331	2.96911992221678	4.02281876250908	5.75057471977611e-05	0.00368331349129739
Contig12571	#N/A	0.563549536290906	11.9445437512885	2.95792377902622	4.03815129922679	5.3874102579802e-05	0.00346997461389841
Contig20767	#N/A	0.912706210692874	11.9491831545372	2.9510577926433	4.04911865308951	5.14108763168405e-05	0.00333009832585554
Contig87620	ref|XP_011052512.1| PREDICTED: uncharacterized protein LOC105144948 [Acromyrmex echinatior]	0.666685842148198	11.9514800962016	2.95779723711296	4.04066916631079	5.32989025346627e-05	0.00343880138421928
Contig150113	#N/A	0.433730264359181	11.9684942004177	2.96035636816646	4.04292345648593	5.27888575707317e-05	0.00340900695071832
Contig37753	ref|XP_011688540.1| PREDICTED: maternal protein pumilio-like [Wasmannia auropunctata]	1.4219232461266	11.9786896037611	2.95824984723624	4.04924878639045	5.13822999838902e-05	0.00333009832585554
Contig138518	ref|XP_011700200.1| PREDICTED: hexosaminidase D-like isoform X1 [Wasmannia auropunctata]	0.788229222777151	11.982998016321	2.95844735486303	4.05043476491939	5.11225605111677e-05	0.00331503645366979
Contig19916	ref|XP_017022416.1| PREDICTED: ribose operon repressor-like [Drosophila kikkawai]	0.722730085801725	11.9913011246768	2.9595067435209	4.05179043802783	5.08271807600081e-05	0.003301589410568
Contig59012	ref|XP_011647720.1| PREDICTED: uridine-cytidine kinase-like 1 isoform X2 [Pogonomyrmex barbatus]	0.410933151194021	11.9926053824981	2.95909200827841	4.05279908463386	5.06084628361042e-05	0.00329076114742431
Contig75922	#N/A	1.27783439736569	12.0061731037359	2.9569296594618	4.0603512719072	4.89989415543206e-05	0.00319197945818388
Contig136916	ref|XP_011860511.1| PREDICTED: activating transcription factor 7-interacting protein 1 isoform X2 [Vollenhovia emeryi]	0.668863515233315	12.0139812946537	2.9688763117546	4.04664257890672	5.19574825680795e-05	0.00335685249859256
Contig41081	ref|XP_011877477.1| PREDICTED: twinkle protein, mitochondrial [Vollenhovia emeryi]	0.56479486506215	12.0183726392331	2.9689060400174	4.04808117105741	5.16392391930504e-05	0.0033408743499361
Contig92199	#N/A	1.23002311486462	12.0209624961543	2.95102950627419	4.0734809565938	4.63156402236936e-05	0.00303396431000799
Contig49401	#N/A	0.326764898595297	12.0282723729457	2.96198861615361	4.06087731308211	4.88886585997109e-05	0.00318626420394988
Contig128500	#N/A	0.562683729345565	12.0708836846333	2.95682185203103	4.08238449548181	4.45759680020258e-05	0.00292814995387366
Contig71334	ref|XP_012541080.1| PREDICTED: RNA-directed DNA polymerase from mobile element jockey-like [Monomorium pharaonis]	0.861492094593376	12.0718616471948	2.9589263060779	4.0798115256869	4.5072229912009e-05	0.00295662528777954
Contig123926	ref|XP_011875779.1| PREDICTED: G protein-activated inward rectifier potassium channel 3-like isoform X4 [Vollenhovia emeryi]	0.573672962337317	12.0754860881258	2.95553365525085	4.08572105638935	4.39401428876106e-05	0.00289041451098264
Contig44043	ref|XP_011879917.1| PREDICTED: autophagy protein 5 [Vollenhovia emeryi]	1.19311117164255	12.0828784525746	2.95364884883937	4.09083106047713	4.29830160289441e-05	0.0028314084922339
Contig139441	ref|XP_011865469.1| PREDICTED: sodium-coupled monocarboxylate transporter 1-like isoform X2 [Vollenhovia emeryi]	1.21369917200632	12.1238100718686	2.9544263955491	4.10360877161582	4.06755080673538e-05	0.00269069628435997
Contig36998	#N/A	1.36011987019059	12.1780303521628	2.41090410391359	5.05122967454174	4.38974856926652e-07	3.9481750706025e-05
Contig22721	ref|XP_011055013.1| PREDICTED: probable phospholipid-transporting ATPase IA isoform X3 [Acromyrmex echinatior]	12.7432114662603	12.2175632374175	2.9547467076706	4.13489359534622	3.55119134647262e-05	0.00237806959091252
Contig133398	ref|XP_011706370.1| PREDICTED: venom acid phosphatase Acph-1-like [Wasmannia auropunctata]	1.42304728074316	12.2324387791259	2.96862552357269	4.12057320197274	3.77930962851646e-05	0.00252079730291495
Contig128836	ref|XP_012527700.1| PREDICTED: dystrophin, isoform E isoform X2 [Monomorium pharaonis]	1.71077752996986	12.2380743795278	2.95342570506405	4.14368790741678	3.41764784251232e-05	0.00229407784894757
Contig133640	#N/A	0.372537828328807	12.2449521434985	2.96002106826877	4.13677871240972	3.52215477639326e-05	0.00236086291954477
Contig67362	ref|XP_011638658.1| PREDICTED: uncharacterized protein LOC105428197 isoform X2 [Pogonomyrmex barbatus]	0.852076265627068	12.2451531152537	2.95337238354873	4.14615955084543	3.38098274959082e-05	0.00227378733731049
Contig42323	#N/A	1.909084981341	12.2544459325378	2.95324139341587	4.14949010258983	3.33216694209195e-05	0.00224309286525377
Contig139277	ref|XP_011692064.1| PREDICTED: otoferlin-like isoform X3 [Wasmannia auropunctata]	1.28312942670932	12.2699563956301	2.9539474834839	4.15374899663377	3.27071942358794e-05	0.00220909580494601
Contig50584	#N/A	0.490311792929096	12.272962398829	2.96396630832939	4.14072264058444	3.46213385388108e-05	0.00232173292430866
Contig37528	#N/A	0.291511993490307	12.2771738319445	2.96280008832878	4.14377395231877	3.41636510675845e-05	0.00229407784894757
Contig43031	#N/A	1.08073443253175	12.2895453703118	2.95282207039388	4.16196610474145	3.1551919272881e-05	0.00213617227479648
Contig87331	#N/A	0.537970855866502	12.2972414969233	2.96340545326276	4.14969928714406	3.32912338266701e-05	0.00224211223355911
Contig61726	#N/A	1.80554338390236	12.3065515485173	2.85001905817261	4.31805938743724	1.57407081634325e-05	0.00112670458022722
Contig112992	ref|XP_011864369.1| PREDICTED: valine--tRNA ligase, mitochondrial-like isoform X1 [Vollenhovia emeryi]	1.23627781569274	12.3483556774228	2.96079056904264	4.17062787437059	3.03761544997415e-05	0.00206249855951464
Contig50951	ref|XP_011689253.1| PREDICTED: histone-lysine N-methyltransferase ash1 [Wasmannia auropunctata]	1.38152926941209	12.3524742974736	2.95367740063099	4.18206615754136	2.88871879936517e-05	0.00197182270625073
Contig96967	#N/A	0.376676211667482	12.361562268767	2.9641883444952	4.17030256924249	3.04195492083855e-05	0.00206445295124748
Contig146295	ref|XP_011877154.1| PREDICTED: uncharacterized protein LOC105567148 [Vollenhovia emeryi]	0.36516460087969	12.3922325476242	2.96125808498615	4.18478639550331	2.85434375464699e-05	0.00195213073330279
Contig74783	ref|XP_011694699.1| PREDICTED: post-GPI attachment to proteins factor 3 isoform X2 [Wasmannia auropunctata]	0.941448241601991	12.3931552846951	2.96736769352966	4.17648116602414	2.96053242690577e-05	0.00201209403715491
Contig91645	ref|XP_011874188.1| PREDICTED: uncharacterized protein LOC105565527 [Vollenhovia emeryi]	4.77410913900142	12.4004877560924	1.74019114243224	7.12593430326304	1.03377020118653e-12	2.42638917137961e-10
Contig11052	ref|XP_011647382.1| PREDICTED: LOW QUALITY PROTEIN: ribosomal protein S6 kinase 2 beta-like [Pogonomyrmex barbatus]	3.09136906378666	12.4022259562404	2.95504697281315	4.19696406532372	2.70516835562731e-05	0.00185369628101393
Contig85026	ref|XP_011870258.1| PREDICTED: calcium-dependent secretion activator isoform X2 [Vollenhovia emeryi]	14.4942040846392	12.4094226764791	1.96884361067564	6.30289912778832	2.92129028146948e-10	4.19481252947961e-08
Contig82790	ref|XP_006819186.1| PREDICTED: late histone H2B.L3-like isoform X2 [Saccoglossus kowalevskii]	1.31097101834295	12.4167159142337	2.96891450657061	4.18224097957479	2.88649783139486e-05	0.00197125898541614
Contig54700	ref|XP_017071107.1| PREDICTED: signal peptidase I-like, partial [Drosophila eugracilis]	0.722913007432945	12.4279573949278	2.9542877395998	4.20675252052846	2.59066573636605e-05	0.00178060703281088
Contig38429	ref|XP_012540119.1| PREDICTED: nucleosome-remodeling factor subunit NURF301, partial [Monomorium pharaonis]	2.95123836030277	12.4280073190413	2.95339327544863	4.20804348081731	2.5759130874306e-05	0.00177372705416511
Contig90922	ref|XP_012246367.1| PREDICTED: probable uroporphyrinogen-III C-methyltransferase [Bombus impatiens]	0.563981944377592	12.4433374990371	2.96202229651424	4.20096010542549	2.65785428266483e-05	0.00182392829809467
Contig111477	#N/A	0.613288169898269	12.4470810988277	2.96193706730956	4.20234488983719	2.64164250400744e-05	0.00181368396933304
Contig149757	ref|XP_011866219.1| PREDICTED: folliculin-interacting protein 2 isoform X7 [Vollenhovia emeryi]	0.950135474287491	12.4614757650852	2.95036420872941	4.2237076114924	2.40315786251183e-05	0.00166613835377494
Contig37960	ref|XP_012527596.1| PREDICTED: mitochondrial substrate carrier family protein U-like [Monomorium pharaonis]	1.9284755882114	12.4673250752514	2.95385474172228	4.22069673879164	2.43548395867947e-05	0.00168277054723488
Contig48160	#N/A	0.828529698558176	12.4679748963949	2.96308189601938	4.20777262793326	2.5790016617452e-05	0.00177498878616469
Contig91499	ref|XP_012222386.1| PREDICTED: survival of motor neuron-related-splicing factor 30 isoform X1 [Linepithema humile]	1.39460836837313	12.4760134053631	2.95480353717945	4.22228187031082	2.41841404840548e-05	0.00167350413519596
Contig56743	ref|XP_011705409.1| PREDICTED: serine/threonine-protein kinase 11-interacting protein isoform X2 [Wasmannia auropunctata]	2.37743147346314	12.4776539477163	2.96062899746406	4.21452804738592	2.50301047174115e-05	0.00172605110114987
Contig94439	#N/A	0.492107532982619	12.4824309502197	2.95567497518466	4.2232082536206	2.40849080725846e-05	0.00166819865486862
Contig94123	ref|XP_011881004.1| PREDICTED: pyridoxal-dependent decarboxylase domain-containing protein 1 [Vollenhovia emeryi]	0.603265475692559	12.4842648972243	2.95387583077465	4.22640138328033	2.37458267369358e-05	0.0016494954780821
Contig45594	ref|XP_011695054.1| PREDICTED: dedicator of cytokinesis protein 7 [Wasmannia auropunctata]	0.588272733728391	12.4983430334802	2.96896922908964	4.20965731507852	2.55758310751092e-05	0.00176196401921975
Contig101083	ref|XP_011868353.1| PREDICTED: muscle LIM protein 1-like isoform X5 [Vollenhovia emeryi]	0.348653478333527	12.5008432179599	2.95902347566053	4.22465158549288	2.39310727147437e-05	0.00166079999085223
Contig84744	ref|XP_011052524.1| PREDICTED: activating signal cointegrator 1 complex subunit 1 isoform X1 [Acromyrmex echinatior]	1.09319528083515	12.5069958233244	2.96139651639319	4.22334386972171	2.40704136822526e-05	0.00166801237962788
Contig141159	ref|XP_011693188.1| PREDICTED: E3 ubiquitin-protein ligase NEDD4 isoform X3 [Wasmannia auropunctata]	3.11202813101269	12.5369838581311	2.95412639506128	4.24388877845257	2.19679263038022e-05	0.0015351147789062
Contig121538	#N/A	0.37298016580189	12.5415768521789	2.95785972402043	4.24008506905523	2.23435093721623e-05	0.00155981761055257
Contig32791	ref|XP_011703886.1| PREDICTED: metallophosphoesterase MPPED2 isoform X1 [Wasmannia auropunctata]	1.44977014289683	12.5427715077905	2.95351103542839	4.24673256924915	2.16910608858789e-05	0.0015187719672904
Contig63286	#N/A	0.312676239125277	12.5501863345719	2.96786243427286	4.22869543737687	2.35050281790995e-05	0.00163605417074986
Contig98641	ref|XP_011168661.1| PREDICTED: tectonin beta-propeller repeat-containing protein isoform X2 [Solenopsis invicta]	2.06559534704828	12.5998932907901	2.9548843608409	4.2640901477459	2.00718401865145e-05	0.00141239581814439
Contig39952	ref|XP_011860711.1| PREDICTED: ralA-binding protein 1 [Vollenhovia emeryi]	3.02051081086332	12.6021708040646	2.96856851771487	4.24520125739439	2.18397307460341e-05	0.00152766754218929
Contig148460	ref|XP_011694911.1| PREDICTED: NACHT and WD repeat domain-containing protein 1-like [Wasmannia auropunctata]	1.01149957202158	12.6159951044428	2.95672723956956	4.26687823469285	1.98227281452403e-05	0.00139695362530574
Contig122358	ref|XP_011879068.1| PREDICTED: aminopeptidase N-like [Vollenhovia emeryi]	0.597566527308749	12.620629216411	2.95916575191074	4.26492811639964	1.99966571179048e-05	0.00140780650761763
Contig63917	#N/A	0.593462245656939	12.6331565243698	2.95516075982889	4.27494730442392	1.91182507565345e-05	0.00134969052132557
Contig106813	#N/A	0.31110092486195	12.6575440974706	2.96254204513804	4.27252808723627	1.93269200103392e-05	0.00136337284907683
Contig116476	ref|XP_015586703.1| PREDICTED: PCTP-like protein [Cephus cinctus]	0.716888290202018	12.6605487730313	2.95281330790628	4.28762249856168	1.80595667949956e-05	0.00127972046611459
Contig41410	#N/A	0.234531840133044	12.6936424674602	2.96935144717362	4.27488719112137	1.91234097234463e-05	0.00134969052132557
Contig144127	ref|XP_012530377.1| PREDICTED: zinc finger protein 85-like [Monomorium pharaonis]	0.360142614503562	12.6997804110054	2.96898764236073	4.27747836663527	1.89022321008056e-05	0.0013374204752867
Contig148266	ref|XP_011870333.1| PREDICTED: exonuclease mut-7 homolog isoform X1 [Vollenhovia emeryi]	3.22400400432836	12.7038011699654	2.72397455149449	4.66370038699353	3.10573467539867e-06	0.000259203185132785
Contig101080	ref|XP_015182254.1| PREDICTED: sorting nexin-8-like [Polistes dominula]	0.296381818273354	12.7150464085492	2.96209548547521	4.29258491864902	1.76604972534839e-05	0.00125206988480959
Contig94334	ref|XP_011169907.1| PREDICTED: uncharacterized protein LOC105202916, partial [Solenopsis invicta]	0.577786286979512	12.7244922745191	2.95617394187942	4.30437874248678	1.67454978083616e-05	0.0011931863861967
Contig133083	#N/A	0.337940005144772	12.7519789939167	2.96393113661819	4.30238706843456	1.68967797717499e-05	0.00120187821079716
Contig46782	#N/A	0.36353591419847	12.7579359163215	2.96771943428753	4.29890230488864	1.71646106928772e-05	0.00121813560877522
Contig7095	ref|XP_012249045.1| PREDICTED: 3,4-dihydroxy-2-butanone 4-phosphate synthase-like [Bombus impatiens]	0.957392907834975	12.7849594910091	2.95289231445241	4.32963959722994	1.4935356967268e-05	0.00107450159541959
Contig97608	#N/A	0.379265701682025	12.792429517358	2.96916904028854	4.30842075468861	1.64424367222821e-05	0.00117336716239813
Contig99275	ref|XP_011172322.1| PREDICTED: cyclin-dependent kinases regulatory subunit [Solenopsis invicta]	1.06382614832081	12.7997590215686	2.95754142097694	4.3278376190385	1.5058041672612e-05	0.00108222589736269
Contig116492	#N/A	1.84667720548621	12.8088060337803	2.95559129102033	4.33375415359221	1.46587869975747e-05	0.00105641722874731
Contig76176	ref|XP_011871302.1| PREDICTED: dynein heavy chain 8, axonemal [Vollenhovia emeryi]	0.396590524517265	12.8099369536442	2.95684630725649	4.33229719184487	1.47561570126418e-05	0.00106269149715354
Contig138582	ref|XP_012533186.1| PREDICTED: nephrin isoform X1 [Monomorium pharaonis]	1.58040732710878	12.8138910860283	2.94729122939081	4.34768405587012	1.37582600835062e-05	0.00099897270042095
Contig101841	ref|XP_009030137.1| hypothetical protein HELRODRAFT_70460, partial [Helobdella robusta]	7.7930632350899	12.8255300069685	2.96191868622334	4.33014250749806	1.49012876357211e-05	0.00107259665769968
Contig48846	#N/A	0.217137314618437	12.8323859145204	2.96951900371266	4.32136851068358	1.55064447370252e-05	0.00111172944679616
Contig120713	ref|XP_013294803.1| hypothetical protein NECAME_18785 [Necator americanus]	0.389203742704531	12.832447506701	2.96902787866449	4.32210407955928	1.54548248914373e-05	0.00110905047876354
Contig32646	#N/A	0.365000673153426	12.8424952761633	2.96900151184932	4.32552668798204	1.52167843353413e-05	0.00109307878811933
Contig68489	ref|XP_017063244.1| PREDICTED: LOW QUALITY PROTEIN: bifunctional purine biosynthesis protein PurH-like [Drosophila eugracilis]	1.28628751572312	12.8476164610594	2.86399359015933	4.48590964211781	7.26035077226289e-06	0.000563972393110737
Contig16018	ref|XP_011871903.1| PREDICTED: uncharacterized protein LOC105564262 isoform X2 [Vollenhovia emeryi]	0.825854530707787	12.8519003907656	2.96876053642922	4.32904581998507	1.49756776389775e-05	0.00107685410857741
Contig81745	ref|XP_011644962.1| PREDICTED: UPF0668 protein C10orf76 homolog [Pogonomyrmex barbatus]	2.97808920098406	12.8547619201336	2.61882375351563	4.90860139132188	9.17282026074789e-07	8.0352881858828e-05
Contig72434	ref|XP_011690834.1| PREDICTED: vacuolar protein sorting-associated protein 35 isoform X1 [Wasmannia auropunctata]	3.00110275837828	12.8568218242216	2.95168134599395	4.35576212915767	1.32604720112119e-05	0.000968802954378597
Contig68437	#N/A	8.2882628603597	12.8596373831267	2.95681643556611	4.34914972348109	1.36666384945788e-05	0.000992830344148333
Contig103346	ref|XP_012234439.1| PREDICTED: uncharacterized protein LOC105679152 [Linepithema humile]	0.628334398380319	12.8663245176599	2.96879322362714	4.33385673857756	1.46519542922318e-05	0.00105641722874731
Contig84115	ref|XP_011702509.1| PREDICTED: run domain Beclin-1 interacting and cysteine-rich containing protein [Wasmannia auropunctata]	1.40771369894222	12.8801077352698	2.96865714792462	4.33869830481242	1.43329120573587e-05	0.00103643678350492
Contig64161	#N/A	0.239833988632024	12.8829931734451	2.9695184578415	4.33841154932896	1.43516221751968e-05	0.00103725890459784
Contig141971	ref|XP_015765263.1| PREDICTED: omega-6 fatty acid desaturase, endoplasmic reticulum isozyme 1-like [Acropora digitifera]	0.24164854926718	12.885132128556	2.96927738054251	4.33948414957507	1.42817566953474e-05	0.00103326644945341
Contig148664	#N/A	0.184499735016146	12.8907759268582	2.96959261630635	4.3409240230709	1.41884781385889e-05	0.00102704374771936
Contig19452	#N/A	0.23984086598815	12.8925113761235	2.96935104790097	4.34186162839761	1.4128050424246e-05	0.00102424378696495
Contig63561	ref|XP_011866719.1| PREDICTED: mediator of RNA polymerase II transcription subunit 1 [Vollenhovia emeryi]	0.23984086598815	12.8925113761235	2.96935104790097	4.34186162839761	1.4128050424246e-05	0.00102424378696495
Contig70346	#N/A	0.403687043156955	12.8963238931602	2.96904799624051	4.3435888909475	1.40173721127488e-05	0.00101726380452751
Contig91081	ref|XP_013078548.1| PREDICTED: phoH-like protein [Biomphalaria glabrata]	0.953402980644831	12.9100332960592	2.95261528673268	4.37240616956408	1.22884635870343e-05	0.000905277914211252
Contig77766	#N/A	0.25361019396316	12.921716089307	2.96935166179624	4.35169611452835	1.35088411875587e-05	0.000982882972851945
Contig53638	#N/A	0.222147985773377	12.9264625921922	2.96959227231754	4.35294188791245	1.34322764557483e-05	0.000978824325099468
Contig125600	#N/A	0.279657146602032	12.9275500122887	2.96915804785038	4.35394472235925	1.3370943575025e-05	0.000975864780124129
Contig80957	ref|XP_011631790.1| PREDICTED: gamma-aminobutyric acid receptor subunit beta isoform X1 [Pogonomyrmex barbatus]	0.181678465193036	12.9317654306199	2.96971337072165	4.35455002429323	1.33340529850453e-05	0.000973675289213411
Contig68767	#N/A	0.43923216683706	12.9440446737494	2.96913234144079	4.35953779933845	1.30337439834896e-05	0.000953224080556483
Contig68591	ref|XP_011172929.1| PREDICTED: nose resistant to fluoxetine protein 6-like [Solenopsis invicta]	0.94087361659216	12.9492638181543	2.96076324889052	4.37362353204253	1.22201042953058e-05	0.000902063893440333
Contig91306	#N/A	0.347803493492241	12.9577422359179	2.96908486174919	4.36422090956471	1.27576607492184e-05	0.000934968460001196
Contig124646	#N/A	0.266393668154006	12.9588845927493	2.96943572895177	4.36408994018668	1.27653053620393e-05	0.000935043728221908
Contig125031	ref|XP_011708245.1| PREDICTED: FAS-associated factor 1 isoform X3 [Wasmannia auropunctata]	0.633047348221301	12.9622590865247	2.96889029411307	4.36602831442686	1.26526085604845e-05	0.000927750717058005
Contig92844	ref|XP_011875513.1| PREDICTED: calcium-dependent protein kinase 4-like [Vollenhovia emeryi]	1.46661854737817	12.9630917658497	2.95525721395287	4.38645127220946	1.15214960846243e-05	0.00085456841588932
Contig103757	#N/A	0.495357507029898	12.9644240924924	2.96891443195696	4.36672204255711	1.26125064754227e-05	0.00092577107919886
Contig51290	ref|XP_011066101.1| PREDICTED: chymotrypsin-like elastase family member 2A [Acromyrmex echinatior]	0.235697061414143	12.9646661869449	2.96935147033141	4.36616086592739	1.2644936814654e-05	0.000927669593509949
Contig97570	ref|XP_017045460.1| PREDICTED: uvrABC system protein A-like [Drosophila ficusphila]	0.477063243635375	12.9695359478497	2.96889189440495	4.36847699718927	1.25115992284673e-05	0.000918841702798725
Contig52512	#N/A	0.168946033469799	12.9874355851068	2.9697132557367	4.37329616252293	1.22384515150719e-05	0.000902063893440333
Contig61812	#N/A	0.168946033469799	12.9874355851068	2.9697132557367	4.37329616252293	1.22384515150719e-05	0.000902063893440333
Contig84422	#N/A	0.168946033469799	12.9874355851068	2.9697132557367	4.37329616252293	1.22384515150719e-05	0.000902063893440333
Contig134145	ref|XP_011692917.1| PREDICTED: PAX-interacting protein 1-like [Wasmannia auropunctata]	7.1159227127208	12.9920139844075	2.95231817610237	4.40061443565661	1.07944781254364e-05	0.000806571853881435
Contig91141	ref|XP_011861558.1| PREDICTED: phenylalanine--tRNA ligase beta subunit, chloroplastic-like [Vollenhovia emeryi]	0.336882003485052	12.9971458861919	2.96919565630286	4.37732887645927	1.2014262108294e-05	0.000887855226524907
Contig341	#N/A	3.96165334407779	12.997791472549	1.71403637113872	7.58314799581171	3.3726975028682e-14	9.94889434369036e-12
Contig88043	ref|XP_012942128.1| PREDICTED: probable beta-D-xylosidase 7 [Aplysia californica]	0.618082749503376	13.000757192381	2.96908376843679	4.37871013630103	1.19383793676992e-05	0.000882709152023965
Contig94346	#N/A	0.181737198633474	13.0031158570454	2.96959199884066	4.37875501487137	1.19359215475248e-05	0.000882709152023965
Contig95421	ref|XP_015050400.1| uncharacterized protein Dyak_GE21989, isoform B [Drosophila yakuba]	0.315151531329862	13.0067802718875	2.9691089405539	4.38070159509238	1.18297786619661e-05	0.000876514019716743
Contig142315	#N/A	0.191986106753394	13.0075340753763	2.96947112778275	4.38042113077852	1.18450160409423e-05	0.00087718303539676
Contig42929	#N/A	0.19336737494473	13.0227950486419	2.96959220736835	4.38538160772677	1.1578261859962e-05	0.000858328261294358
Contig72947	#N/A	0.413165748041286	13.0299280729995	2.96895293146946	4.38872840821711	1.14015347640899e-05	0.000846559462722868
Contig121935	#N/A	0.211509978622065	13.036398983684	2.96947315761644	4.39013868512221	1.1327839144591e-05	0.000841529804213079
Contig41519	ref|XP_011874752.1| PREDICTED: DDB1- and CUL4-associated factor 11 [Vollenhovia emeryi]	0.290192465531394	13.0483686115096	2.96922959327322	4.39453002929469	1.1101265797575e-05	0.000825566080736821
Contig70467	ref|XP_011706302.1| PREDICTED: LOW QUALITY PROTEIN: uncharacterized protein LOC105461502 [Wasmannia auropunctata]	0.174565374978009	13.0553091039058	2.96971307879103	4.396151667696	1.10186956981687e-05	0.000820721479211459
Contig82052	ref|XP_011504129.1| PREDICTED: proline synthase co-transcribed bacterial homolog protein-like [Ceratosolen solmsi marchali]	0.174565374978009	13.0553091039058	2.96971307879103	4.396151667696	1.10186956981687e-05	0.000820721479211459
Contig51179	#N/A	0.190011053069237	13.0575110049103	2.96959216721383	4.39707214649655	1.09720882475584e-05	0.000818112481855018
Contig54044	#N/A	0.190011053069237	13.0575110049103	2.96959216721383	4.39707214649655	1.09720882475584e-05	0.000818112481855018
Contig89877	#N/A	0.190011053069237	13.0575110049103	2.96959216721383	4.39707214649655	1.09720882475584e-05	0.000818112481855018
Contig67006	ref|XP_011871560.1| PREDICTED: helicase POLQ-like [Vollenhovia emeryi]	1.01781312803668	13.0618314331754	2.9687104599571	4.39983339883005	1.0833401752039e-05	0.000809052414036923
Contig126841	#N/A	0.316343519524791	13.0623901277307	2.96219862255434	4.40969421438285	1.03516685001531e-05	0.000777183689726959
Contig1241	ref|XP_011156397.1| PREDICTED: protein inturned [Solenopsis invicta]	1.29556004838181	13.0696855549884	2.96110122711506	4.41379221868814	1.01575452784415e-05	0.000764233586372712
Contig67073	#N/A	0.598234383062665	13.0698927669626	2.95497462392871	4.42301353829761	9.73336396797583e-06	0.0007365967451598
Contig91351	#N/A	0.688970704665601	13.0703779822103	2.96889020838815	4.4024457170164	1.07037375891209e-05	0.000800214820174609
Contig32290	#N/A	0.289706703493692	13.0790635481575	2.96915717771358	4.40497513783662	1.05796010979022e-05	0.000792191783958815
Contig48939	#N/A	0.289706703493692	13.0790635481575	2.96915717771358	4.40497513783662	1.05796010979022e-05	0.000792191783958815
Contig97602	ref|XP_012248209.1| PREDICTED: ethylene receptor-like [Bombus impatiens]	0.289706703493692	13.0790635481575	2.96915717771358	4.40497513783662	1.05796010979022e-05	0.000792191783958815
Contig63294	#N/A	0.233989972789796	13.0815080600229	2.96923032347332	4.4056899044196	1.05447723533283e-05	0.000790841135460842
Contig118072	#N/A	0.310996786210185	13.0867218779925	2.96910849315239	4.40762670282146	1.04509465709952e-05	0.000784220604164581
Contig86707	ref|XP_011635728.1| PREDICTED: protein spinster isoform X2 [Pogonomyrmex barbatus]	0.230388035559037	13.0999660564693	2.96935142162586	4.41172639959752	1.02549648306283e-05	0.000771152616111386
Contig47777	#N/A	0.285370756853109	13.1115634747791	2.9691573268687	4.41592075843509	1.00580927958192e-05	0.00075755774934481
Contig36492	#N/A	0.312359515911129	13.1147335601311	2.96915750964936	4.41698815826037	1.00085711078851e-05	0.000755035275937447
Contig56058	#N/A	0.312359515911129	13.1147335601311	2.96915750964936	4.41698815826037	1.00085711078851e-05	0.000755035275937447
Contig147341	#N/A	0.33340360739991	13.1149393647827	2.9693889358952	4.41671321875146	1.00213045285857e-05	0.000755592457831148
Contig70413	#N/A	0.150430148270243	13.1281122333003	2.97030415500685	4.41978718279442	9.87981481386812e-06	0.000746118756683658
Contig71556	#N/A	0.197095229367293	13.1327621692504	2.96959218343534	4.42241269441177	9.76047941846548e-06	0.000737863547252899
Contig954	#N/A	5.00134320969667	13.1419020987434	2.97132563737377	4.42290872916877	9.73808870647294e-06	0.0007365967451598
Contig103904	#N/A	0.550537231274609	13.1421418244741	2.96890520938116	4.42659529275221	9.57321013168647e-06	0.000725679115867437
Contig53852	#N/A	1.21176004524182	13.1522871599203	2.96870974914875	4.43030416284097	9.41002690680874e-06	0.000713692201745225
Contig28364	ref|XP_011879837.1| PREDICTED: peptidylprolyl isomerase domain and WD repeat-containing protein 1 [Vollenhovia emeryi]	5.86432513219469	13.1553114782702	2.95270559925484	4.45534139319213	8.37598002405091e-06	0.000642508604483345
Contig47394	#N/A	0.353683922704135	13.1580333582765	2.96907418232889	4.43169572407101	9.34948917945854e-06	0.000709862854696375
Contig118572	#N/A	0.47936736374791	13.1686585606197	2.95454887811269	4.45707927128	8.30838859436739e-06	0.000638016512618657
Contig38100	#N/A	0.342792941369321	13.1693508623465	2.96907441514728	4.43550717191882	9.18557733854571e-06	0.000697792753335749
Contig33530	ref|XP_016037401.1| ATPsyn-beta [Drosophila simulans]	0.891016518442064	13.1724311192683	2.96904936894691	4.43658204442065	9.13985091743744e-06	0.000695066477438728
Contig101413	#N/A	0.178821660067498	13.1727150505945	2.96971413016007	4.43568453839175	9.17801691875657e-06	0.000697593467761994
Contig129894	ref|XP_011874311.1| PREDICTED: biogenesis of lysosome-related organelles complex 1 subunit 6-like [Vollenhovia emeryi]	0.171708569852471	13.1766227195128	2.9697128302282	4.43700232069249	9.12203105124137e-06	0.000694084879616183
Contig83787	#N/A	0.171708569852471	13.1766227195128	2.9697128302282	4.43700232069249	9.12203105124137e-06	0.000694084879616183
Contig58502	#N/A	0.315338964789703	13.1771287100391	2.96910919094069	4.43807481053408	9.07670741169994e-06	0.000691380877170332
Contig126724	ref|XP_011060185.1| PREDICTED: uncharacterized protein LOC105149451 [Acromyrmex echinatior]	3.34692784301281	13.177242419211	2.94585957044057	4.47314004762293	7.70792582469112e-06	0.000595791463485439
Contig38222	#N/A	0.484270377961585	13.1845530928455	2.96895535475076	4.44080544079195	8.96227971550023e-06	0.000683770646307255
Contig116155	#N/A	0.23636325327081	13.1852237474932	2.96927889364552	4.44054742574387	8.9730326457078e-06	0.000684221583238303
Contig97499	#N/A	0.916767905377349	13.1861799425047	2.95542641742846	4.46168440017467	8.13179281743636e-06	0.000626156909932047
Contig131907	#N/A	0.244198297176632	13.1865061552317	2.96935211704119	4.44086980441085	8.95959924300267e-06	0.000683770646307255
Contig149148	#N/A	0.244198297176632	13.1865061552317	2.96935211704119	4.44086980441085	8.95959924300267e-06	0.000683770646307255
Contig39640	#N/A	0.163765370184729	13.1866628251975	2.96971326984165	4.44038249723032	8.97991259677288e-06	0.000684376866335608
Contig103420	#N/A	0.216636667720286	13.2003195923356	2.96959217504032	4.44516243788807	8.78254823424872e-06	0.000671508505332598
Contig83794	ref|XP_012527698.1| PREDICTED: probable cytochrome P450 6a20 [Monomorium pharaonis]	0.339798726336108	13.2018129799399	2.96916883221685	4.44629919211536	8.73622535420797e-06	0.000668328334528167
Contig79700	#N/A	1.11324082957679	13.2216585435591	2.9631127596276	4.46208417165357	8.11663295292521e-06	0.000625330363331229
Contig88789	#N/A	0.352262070779716	13.2245947619871	2.96919735471331	4.45392918762856	8.43129179254039e-06	0.000646050019745433
Contig57643	#N/A	0.146782757428434	13.239692294299	2.97030414653499	4.45735239259716	8.29781358532048e-06	0.000637550933205561
Contig117255	#N/A	0.449348850615922	13.2454946759604	2.96892719412323	4.46137402836247	8.14358118812116e-06	0.000626723088855096
Contig72914	#N/A	0.276915538330017	13.251194031494	2.96927932151677	4.4627643938614	8.09090009812603e-06	0.000623687894798098
Contig59743	ref|XP_012542909.1| PREDICTED: type-1 glutamine synthetase 1-like [Monomorium pharaonis]	0.313686772374905	13.2569761502176	2.96915747416662	4.46489492913762	8.01080549998239e-06	0.000618188304058444
Contig86769	#N/A	0.313686772374905	13.2569761502176	2.96915747416662	4.46489492913762	8.01080549998239e-06	0.000618188304058444
Contig71117	ref|XP_011881781.1| PREDICTED: RNA binding protein fox-1 homolog 2 isoform X3 [Vollenhovia emeryi]	1.0577582370129	13.2609651804078	2.95739653928366	4.48399969508987	7.32567666181124e-06	0.000568109843734327
Contig13498	#N/A	0.789737083752732	13.2616960943452	2.95701641931431	4.48482328597294	7.29743875852259e-06	0.000566541870474157
Contig61687	ref|XP_012530338.1| PREDICTED: loss of heterozygosity 12 chromosomal region 1 protein homolog [Monomorium pharaonis]	2.3478689538783	13.2674080486824	2.95338896119139	4.49226574048356	7.04694145080735e-06	0.000549509760582078
Contig64852	ref|XP_011876417.1| PREDICTED: protein trachealess isoform X8 [Vollenhovia emeryi]	0.789607362697014	13.2836543836749	2.95397633883765	4.49687230362239	6.89603759892038e-06	0.000538634286685822
Contig33940	ref|XP_004207545.1| PREDICTED: uncharacterized protein LOC101236413 [Hydra vulgaris]	0.251254035735773	13.2852162589503	2.96927858058705	4.47422358609535	7.66894625381825e-06	0.000593427764964818
Contig48721	#N/A	0.251254035735773	13.2852162589503	2.96927858058705	4.47422358609535	7.66894625381825e-06	0.000593427764964818
Contig51774	ref|XP_017067009.1| PREDICTED: siroheme synthase-like [Drosophila eugracilis]	0.251254035735773	13.2852162589503	2.96927858058705	4.47422358609535	7.66894625381825e-06	0.000593427764964818
Contig27149	ref|XP_011165630.1| PREDICTED: transient receptor potential cation channel subfamily V member 5 isoform X1 [Solenopsis invicta]	1.0417007235972	13.3096785034474	2.94885925083117	4.51350077142405	6.37662175833697e-06	0.000502062544715958
Contig42702	ref|XP_012060468.1| PREDICTED: uncharacterized protein LOC105623697 [Atta cephalotes]	3.54787104905159	13.3115255657471	2.95234500036287	4.50879743529669	6.51961194395964e-06	0.000511494507965388
Contig21790	ref|XP_012529462.1| PREDICTED: calcium/calmodulin-dependent 3',5'-cyclic nucleotide phosphodiesterase 1A-like isoform X6 [Monomorium pharaonis]	3.59339599275819	13.3140981703993	2.95286615799645	4.50887289095186	6.51729392760182e-06	0.000511494507965388
Contig66473	ref|XP_011879931.1| PREDICTED: glutamate receptor ionotropic, kainate 2-like [Vollenhovia emeryi]	0.456654097235791	13.3147823625656	2.96893890961968	4.48469394887996	7.30186635168119e-06	0.000566574305268258
Contig149666	ref|XP_011645830.1| PREDICTED: vitellogenin receptor-like [Pogonomyrmex barbatus]	1.51636661733501	13.3249777655921	2.3917795385442	5.57115635068214	2.53054101386178e-08	2.76106450683882e-06
Contig143529	ref|XP_011689749.1| PREDICTED: sodium channel protein para [Wasmannia auropunctata]	4.22001355916428	13.328879675187	2.95020484440858	4.51795057568586	6.24410539511976e-06	0.000493165656799461
Contig84249	ref|XP_011700162.1| PREDICTED: synaptic vesicle glycoprotein 2B-like isoform X2 [Wasmannia auropunctata]	13.9808678333535	13.3352445793954	2.93515175519142	4.54328964620288	5.53830693988489e-06	0.000442366396656255
Contig138307	ref|XP_011858724.1| PREDICTED: uncharacterized protein LOC105556248 isoform X2 [Vollenhovia emeryi]	0.275225194426028	13.3354200039282	2.96927874518016	4.4911310619034	7.0845936887013e-06	0.000551228983718297
Contig139526	#N/A	0.275225194426028	13.3354200039282	2.96927874518016	4.4911310619034	7.0845936887013e-06	0.000551228983718297
Contig147495	#N/A	0.275225194426028	13.3354200039282	2.96927874518016	4.4911310619034	7.0845936887013e-06	0.000551228983718297
Contig67456	ref|XP_011870333.1| PREDICTED: exonuclease mut-7 homolog isoform X1 [Vollenhovia emeryi]	1.27322527684439	13.3400072855644	2.96863579740888	4.49364900106909	7.001299319479e-06	0.000546553917096367
Contig89105	#N/A	0.204390011050912	13.3646682801242	2.96959224581427	4.50050618867358	6.77918308834039e-06	0.000530386618401568
Contig95053	#N/A	0.242798817212681	13.3693557686835	2.96935145906347	4.50244976150456	6.7174636947733e-06	0.000525849012565309
Contig83557	ref|XP_012543357.1| PREDICTED: ATP-binding cassette sub-family E member 1 [Monomorium pharaonis]	1.39238765238537	13.3882767665774	2.95493969536704	4.53081218123283	5.87573588840372e-06	0.000465633120484453
Contig103127	#N/A	0.522569679172144	13.388748407988	2.96685576913971	4.51277360606927	6.3985311329691e-06	0.000503392680119785
Contig68174	ref|XP_011882019.1| PREDICTED: uncharacterized protein LOC105569853 [Vollenhovia emeryi]	0.747097716900128	13.3918823340348	2.95152682923803	4.53727277738892	5.69863771798844e-06	0.000453134790456172
Contig98658	#N/A	0.202787346388623	13.3923346095582	2.96947373721916	4.51000271250077	6.48267968307698e-06	0.000509162418665774
Contig136592	ref|XP_012221592.1| PREDICTED: leishmanolysin-like peptidase [Linepithema humile]	0.446782789139847	13.3946333331911	2.96898700890629	4.51151631617459	6.43658310584854e-06	0.000506104553760201
Contig82185	ref|XP_012063794.1| PREDICTED: B-cell CLL/lymphoma 7 protein family member B [Atta cephalotes]	0.917988435799723	13.3989890745028	2.95648731088083	4.53206378569264	5.84102054794385e-06	0.000463662179979113
Contig34546	#N/A	0.225455030650349	13.4020337551538	2.969352938505	4.51345260489694	6.3780707854034e-06	0.000502062544715958
Contig51717	#N/A	0.225455030650349	13.4020337551538	2.969352938505	4.51345260489694	6.3780707854034e-06	0.000502062544715958
Contig394	#N/A	1.11516103375887	13.4046275962522	2.96876530323831	4.51521970484852	6.3251155985622e-06	0.000498727599737748
Contig7283	ref|XP_011874189.1| PREDICTED: uncharacterized protein LOC105565515 isoform X3 [Vollenhovia emeryi]	1.16331144827975	13.4203565639738	2.95633526210881	4.53952457151318	5.63812101747042e-06	0.000449069664828364
Contig72909	#N/A	0.342521489033718	13.4217008484258	2.9690019632462	4.52061029752602	6.16616076968742e-06	0.000487554570942655
Contig126235	#N/A	0.55009225279084	13.430355900978	2.95851143665119	4.53956531470441	5.6370317357338e-06	0.000449069664828364
Contig113374	#N/A	0.684151547374829	13.4496302414693	2.95030833009042	4.55872022062763	5.14662791321004e-06	0.000413889063319772
Contig106022	#N/A	0.208693468052544	13.4601366300565	2.9695915314473	4.53265591833648	5.82466524852865e-06	0.000462623791805145
Contig24430	ref|XP_011858347.1| PREDICTED: putative nuclease HARBI1 [Vollenhovia emeryi]	1.17806591631562	13.4711640018119	2.52067572470038	5.34426696373774	9.07836866556647e-08	8.84652591267963e-06
Contig54817	#N/A	0.232568120865376	13.4718721172504	2.96935232481785	4.53697326674658	5.70673372753304e-06	0.000453512010966949
Contig80308	#N/A	0.310815584689279	13.4720341220557	2.96919546747608	4.53726750886745	5.69878003524928e-06	0.000453134790456172
Contig82718	ref|XP_016915682.1| PREDICTED: ubiquitin-conjugating enzyme E2-24 kDa [Apis cerana]	0.917344972959518	13.4735035495267	2.96878236209343	4.53839382824475	5.66843230341818e-06	0.000451229565733002
Contig72468	ref|XP_013186435.1| PREDICTED: transposable element Tcb1 transposase [Amyelois transitella]	0.522807047237191	13.4814309723861	2.95428950901971	4.56334117940239	5.03458986702671e-06	0.000406498539680727
Contig147737	ref|XP_011873116.1| PREDICTED: golgin subfamily A member 2 [Vollenhovia emeryi]	0.954976571404954	13.4831670713354	2.96880241093029	4.54161820325064	5.58240716813967e-06	0.000445385310918481
Contig33058	#N/A	0.211517973110227	13.5025584529165	2.96952045662232	4.54705015512001	5.44030371606698e-06	0.000434784272720089
Contig105696	ref|XP_011695841.1| PREDICTED: adenomatous polyposis coli protein-like [Wasmannia auropunctata]	0.488396594353264	13.5184323353373	2.96892717613945	4.55330546467482	5.28095054971372e-06	0.000423245870574532
Contig128551	#N/A	0.234239009175418	13.5186957290077	2.96935171854069	4.5527431609387	5.29509031624901e-06	0.000424138535382673
Contig12245	ref|XP_017117665.1| PREDICTED: S-(hydroxymethyl)glutathione dehydrogenase [Drosophila elegans]	0.755876890436496	13.5207332735981	2.96894644938418	4.55405090799216	5.26226125342154e-06	0.000422226989395062
Contig109595	ref|XP_011861203.1| PREDICTED: intraflagellar transport protein 80 homolog isoform X1 [Vollenhovia emeryi]	0.26189866869684	13.5224175139726	2.96923021659016	4.55418291192712	5.25895833892887e-06	0.00042221861623128
Contig131995	ref|XP_011862845.1| PREDICTED: dehydrogenase/reductase SDR family member 4-like [Vollenhovia emeryi]	0.1569381055598	13.5258899860692	2.97031022578939	4.55369606468447	5.27114975487907e-06	0.000422700140133455
Contig140780	ref|XP_011645157.1| PREDICTED: transcription factor SPT20 homolog [Pogonomyrmex barbatus]	3.48704620868129	13.5280228165318	2.96024411285056	4.56990109626637	4.87954439758675e-06	0.000395108873779836
Contig79156	ref|XP_011566994.1| PREDICTED: methylthioribulose-1-phosphate dehydratase-like [Plutella xylostella]	0.84829237947525	13.5418522151336	2.96881723484514	4.5613627057241	5.0822702707989e-06	0.000408946208686259
Contig69773	ref|XP_011173162.1| PREDICTED: calpain-C [Solenopsis invicta]	0.287538767739647	13.5437467203317	2.96919531660505	4.56141993912934	5.08088491601781e-06	0.000408946208686259
Contig79961	#N/A	0.194753113212588	13.5480692417154	2.96959374959137	4.56226352294139	5.06050757022317e-06	0.000407891921363276
Contig88169	ref|XP_012535848.1| PREDICTED: replication factor C subunit 1 [Monomorium pharaonis]	0.194753113212588	13.5480692417154	2.96959374959137	4.56226352294139	5.06050757022317e-06	0.000407891921363276
Contig90941	#N/A	0.231118233754708	13.5486255470992	2.96935032808132	4.56282487753938	5.04699105638997e-06	0.00040726710182452
Contig62650	ref|XP_011880608.1| PREDICTED: protein-cysteine N-palmitoyltransferase Rasp isoform X1 [Vollenhovia emeryi]	1.3984280607879	13.5593223949279	2.95275548052477	4.59209117868377	4.38826557035754e-06	0.000357789244255516
Contig145389	ref|XP_011173019.1| PREDICTED: uncharacterized protein LOC105205364 [Solenopsis invicta]	0.208960230712614	13.5631837704623	2.96951929352718	4.56746780532012	4.93651468979081e-06	0.000399264290854821
Contig65625	#N/A	0.374358903034114	13.5671352349126	2.9691492260784	4.56936792389913	4.89197335650628e-06	0.000395888407419397
Contig70703	#N/A	3.45027333875859	13.5700717682333	2.87801688929307	4.71507718343047	2.41619140763506e-06	0.000203699640408479
Contig74381	ref|XP_012521463.1| PREDICTED: myrosinase 1 [Monomorium pharaonis]	0.21979182754599	13.5713172008808	2.96952003200076	4.57020564085467	4.8724586341941e-06	0.000394761346121401
Contig82866	#N/A	0.21979182754599	13.5713172008808	2.96952003200076	4.57020564085467	4.8724586341941e-06	0.000394761346121401
Contig37641	ref|XP_011639327.1| PREDICTED: LOW QUALITY PROTEIN: zinc finger protein on ecdysone puffs [Pogonomyrmex barbatus]	5.01289146090989	13.574791785395	2.95027320688784	4.60119820554337	4.20067460985855e-06	0.000343684261927726
Contig130927	#N/A	0.215795186310372	13.5928560703844	2.96947335912866	4.57753090412402	4.7049629891485e-06	0.00038184787793091
Contig64651	ref|XP_011871455.1| PREDICTED: ankyrin repeat and BTB/POZ domain-containing protein BTBD11 isoform X4 [Vollenhovia emeryi]	1.7435607038172	13.6053368745021	2.81994596486103	4.82467999175743	1.40228231549841e-06	0.00012111142074143
Contig109971	#N/A	1.04540186317601	13.6113339315082	2.95059602976127	4.61307945724086	3.96746545053874e-06	0.000325357496090988
Contig49437	ref|XP_011879209.1| PREDICTED: lanC-like protein 2 [Vollenhovia emeryi]	1.4715917707285	13.6395587745533	2.95367301669684	4.61782963024347	3.87774407784244e-06	0.000318925264823576
Contig46529	#N/A	0.196271314441701	13.6412415306315	2.9694735455072	4.59382490585599	4.35194575540074e-06	0.000355032840300726
Contig51970	ref|XP_014212662.1| PREDICTED: uncharacterized protein LOC106642398 [Copidosoma floridanum]	0.196271314441701	13.6412415306315	2.9694735455072	4.59382490585599	4.35194575540074e-06	0.000355032840300726
Contig40050	ref|XP_011163099.1| PREDICTED: uncharacterized protein LOC105198146 isoform X1 [Solenopsis invicta]	0.738812211150268	13.6424780750374	2.96930307986975	4.59450507680605	4.33777567831349e-06	0.000354285947987665
Contig17461	ref|XP_014218529.1| PREDICTED: galectin-8-like [Copidosoma floridanum]	1.4905367960313	13.6461062304269	2.95371653252587	4.61997828165232	3.83780214847886e-06	0.000316038709434164
Contig122368	ref|XP_011879066.1| PREDICTED: aminopeptidase N-like isoform X1 [Vollenhovia emeryi]	2.59064191689955	13.6557577533416	2.95306317453678	4.62426874951081	3.75922210929101e-06	0.000310260985032998
Contig56366	#N/A	1.16712893816419	13.6684283596413	2.94713931466029	4.63786299196949	3.52030003570085e-06	0.000291563794926391
Contig107451	#N/A	0.817124250932226	13.6801354318279	2.95525882552387	4.62908199907087	3.67290318715019e-06	0.00030349134598524
Contig144939	#N/A	0.19642400152263	13.69219027956	2.96947179115475	4.61098513221958	4.00765203749243e-06	0.000328272005763228
Contig150225	ref|XP_011860387.1| PREDICTED: uncharacterized protein LOC105557685, partial [Vollenhovia emeryi]	0.19642400152263	13.69219027956	2.96947179115475	4.61098513221958	4.00765203749243e-06	0.000328272005763228
Contig10446	#N/A	0.210009352559121	13.7047602868438	2.96959292443295	4.61502995043026	3.93038632064394e-06	0.00032250394654357
Contig47800	ref|XP_003691695.1| PREDICTED: hypoxanthine-guanine phosphoribosyltransferase-like [Apis florea]	0.210009352559121	13.7047602868438	2.96959292443295	4.61502995043026	3.93038632064394e-06	0.00032250394654357
Contig68712	ref|XP_014259937.1| PREDICTED: glycerol kinase-like [Cimex lectularius]	0.210009352559121	13.7047602868438	2.96959292443295	4.61502995043026	3.93038632064394e-06	0.00032250394654357
Contig87249	#N/A	0.604170260167429	13.7140805288623	2.95442499934151	4.64187804121578	3.45256636542491e-06	0.000286457586456514
Contig104793	ref|XP_011172510.1| PREDICTED: uncharacterized protein LOC105204926, partial [Solenopsis invicta]	0.234914413050638	13.718829332637	2.96947044694687	4.61995819717363	3.83817367239946e-06	0.000316038709434164
Contig76830	#N/A	0.252849903211138	13.7225442756332	2.96952079076503	4.62113089704884	3.81653865686911e-06	0.000314807625568964
Contig84746	ref|XP_011052525.1| PREDICTED: activating signal cointegrator 1 complex subunit 1 isoform X2 [Acromyrmex echinatior]	2.13560401566586	13.724021455752	2.95594601501225	4.64285253724269	3.43631612925676e-06	0.000285276827329961
Contig135379	#N/A	0.743337820064792	13.7335968106537	2.95468617812845	4.6480729196604	3.35050478175067e-06	0.00027880817087575
Contig5234	ref|XP_011705448.1| PREDICTED: protein spire homolog 1-like isoform X3 [Wasmannia auropunctata]	0.768191694700465	13.7469166271453	2.96875866510001	4.63052682211951	3.64736529287861e-06	0.000301557503679268
Contig54017	#N/A	0.308491675972877	13.7593851650376	2.96919541128388	4.63404500517128	3.58588983469766e-06	0.000296648405136578
Contig148749	ref|XP_012218253.1| PREDICTED: THAP domain-containing protein 4-like [Linepithema humile]	0.403003351176627	13.7701107510433	2.96900057837916	4.63796162631961	3.51862091843134e-06	0.000291563794926391
Contig123220	#N/A	0.279402980086896	13.7729607799646	2.96923075116282	4.6385619489394	3.50841778125375e-06	0.000290920720209983
Contig45510	ref|XP_011865370.1| PREDICTED: 1-phosphatidylinositol 4,5-bisphosphate phosphodiesterase gamma-1 isoform X3 [Vollenhovia emeryi]	0.366091925954477	13.8175018278435	2.96914912100202	4.65369075945247	3.2604568050068e-06	0.000271634885127975
Contig119230	ref|XP_012543515.1| PREDICTED: uncharacterized protein LOC105840971, partial [Monomorium pharaonis]	0.206579349653996	13.8448634762378	2.96959086501556	4.66221244122975	3.12828019469961e-06	0.000260930700513856
Contig69949	ref|XP_011176269.1| PREDICTED: uncharacterized protein LOC105208185 [Solenopsis invicta]	1.91243623890573	13.8777275205114	2.95333234998379	4.69900636837828	2.61430302933314e-06	0.000219354617063946
Contig112004	ref|XP_011874806.1| PREDICTED: uncharacterized protein LOC105565871 [Vollenhovia emeryi]	1.0358951983693	13.8882501198905	2.96927308009349	4.67732328595834	2.90643853520114e-06	0.000243144491242342
Contig84591	ref|XP_011864763.1| PREDICTED: telomerase reverse transcriptase-like [Vollenhovia emeryi]	3.45901031383261	13.8919825947811	2.75677211208603	5.03922051948979	4.67431660966439e-07	4.19610491738087e-05
Contig126156	ref|XP_011863792.1| PREDICTED: G-protein coupled receptor Mth2-like isoform X2 [Vollenhovia emeryi]	0.680074166555692	13.8948680484863	2.66743325713211	5.20907805709275	1.89781266266282e-07	1.77703933595937e-05
Contig84555	#N/A	0.746136345792609	13.9768348266466	2.95610827510979	4.72812005714759	2.26608187044721e-06	0.000191387071158745
Contig59140	ref|XP_011865488.1| PREDICTED: uncharacterized protein LOC105560735 [Vollenhovia emeryi]	0.153239819024348	13.9829185960776	2.97030803227509	4.70756515625333	2.50693163869044e-06	0.000210595671671845
Contig61750	#N/A	0.153239819024348	13.9829185960776	2.97030803227509	4.70756515625333	2.50693163869044e-06	0.000210595671671845
Contig62580	ref|XP_008188885.1| PREDICTED: mannonate dehydratase-like, partial [Acyrthosiphon pisum]	0.153239819024348	13.9829185960776	2.97030803227509	4.70756515625333	2.50693163869044e-06	0.000210595671671845
Contig117964	ref|XP_011872398.1| PREDICTED: glutamate receptor ionotropic, kainate 2-like isoform X3 [Vollenhovia emeryi]	1.19233871897922	13.9850890794887	2.95368321777548	4.73479653990157	2.19274955140608e-06	0.000185637467564425
Contig143501	ref|XP_011697832.1| PREDICTED: coiled-coil domain-containing protein 51-like [Wasmannia auropunctata]	1.95716162782011	14.005789904915	2.95608560669842	4.73795138854513	2.15889581242015e-06	0.000182990702823953
Contig8527	ref|XP_011685553.1| PREDICTED: transcription intermediary factor 1-beta-like isoform X1 [Wasmannia auropunctata]	1.69478836928188	14.0274282134116	2.95724985518528	4.74340312801631	2.10157463799762e-06	0.000178453240159345
Contig146983	ref|XP_011879211.1| PREDICTED: sulfatase-modifying factor 1 [Vollenhovia emeryi]	1.95149199367994	14.0504122789046	2.95685990518534	4.75180181998643	2.01611930129727e-06	0.000171609402961084
Contig32189	ref|XP_011868162.1| PREDICTED: tetratricopeptide repeat protein 17 isoform X1 [Vollenhovia emeryi]	4.65034889414309	14.0676008900358	2.95352657110713	4.7629843684672	1.90750622777631e-06	0.000163051970638904
Contig1457	ref|XP_011168033.1| PREDICTED: MAM and LDL-receptor class A domain-containing protein 2-like [Solenopsis invicta]	19.0013075515738	14.0777346250276	2.96277519768408	4.75153654453156	2.01876663430028e-06	0.000171731287854742
Contig65394	#N/A	0.20025308383303	14.1149387808973	2.96947304337403	4.75334800980692	2.00075524278131e-06	0.000170404287847661
Contig67885	#N/A	0.20025308383303	14.1149387808973	2.96947304337403	4.75334800980692	2.00075524278131e-06	0.000170404287847661
Contig88219	#N/A	6.90913967860669	14.1161549164912	2.9713210594316	4.75080095154429	2.02612500941495e-06	0.00017225354118851
Contig104546	#N/A	4.1244417481265	14.1283306449219	2.96887655870396	4.75881376862954	1.94733998836384e-06	0.000166155373391211
Contig80088	#N/A	0.352806566257857	14.1356823842862	2.969170825327	4.7608181596387	1.92809714722224e-06	0.000164612895837499
Contig137300	ref|XP_011865967.1| PREDICTED: PHD finger protein 14 isoform X1 [Vollenhovia emeryi]	2.06167101770922	14.1546951372006	2.96080805097293	4.78068651986721	1.74697590264655e-06	0.000149692209894633
Contig97269	ref|XP_015375101.1| PREDICTED: uncharacterized protein LOC107169770 [Diuraphis noxia]	6.3756329270196	14.2090384306037	2.95674271238358	4.80563911465571	1.54257932306769e-06	0.000133065830654148
Contig75990	ref|XP_017118195.1| PREDICTED: probable DNA helicase II homolog [Drosophila elegans]	0.187356540141684	14.2153771319761	2.96959382038089	4.78697693752365	1.69312281436248e-06	0.000145342147205939
Contig75115	ref|XP_011877267.1| PREDICTED: inositol polyphosphate 5-phosphatase OCRL-1 [Vollenhovia emeryi]	1.85230834796182	14.3177615726071	2.95013722515734	4.85325274041906	1.21452744410882e-06	0.000105281646791561
Contig83617	#N/A	11.218193751119	14.3376179429707	2.96460121166885	4.83627203771523	1.32296835567248e-06	0.000114471193969048
Contig97286	ref|XP_011870210.1| PREDICTED: C2 domain-containing protein 3 isoform X1 [Vollenhovia emeryi]	6.97908642863516	14.3725232803742	2.95218586608123	4.86843441854577	1.12485839495443e-06	9.78689141821898e-05
Contig64678	ref|XP_014206012.1| PREDICTED: 5'-AMP-activated protein kinase catalytic subunit alpha-2 [Copidosoma floridanum]	1.14277573172361	14.3873041276533	2.9495559650986	4.87778645256943	1.07282980874114e-06	9.35148880232549e-05
Contig107468	ref|XP_011690198.1| PREDICTED: protein EFR3 homolog cmp44E [Wasmannia auropunctata]	5.11833837261894	14.3984046090066	2.95224608328737	4.87710177363461	1.07655897189651e-06	9.37820918939954e-05
Contig126961	#N/A	0.938943247780945	14.4171674235716	2.94978975516109	4.88752372888496	1.02112191216067e-06	8.92278681648525e-05
Contig95903	ref|XP_011157055.1| PREDICTED: uncharacterized protein LOC105194040 [Solenopsis invicta]	0.819868346631118	14.4484095497454	2.95662121510779	4.8867976309974	1.02489343746765e-06	8.95020816031315e-05
Contig105004	ref|XP_011687399.1| PREDICTED: DENN domain-containing protein 1B [Wasmannia auropunctata]	1.90931972945158	14.5179377871411	2.9536564414352	4.91524253920565	8.86726124896929e-07	7.77726513156806e-05
Contig56460	ref|XP_011056365.1| PREDICTED: centaurin-gamma-1A isoform X2 [Acromyrmex echinatior]	4.054245585981	14.5280280610554	2.24510214592062	6.4709875617254	9.73644502001746e-11	1.52014416794852e-08
Contig35109	ref|XP_011155882.1| PREDICTED: latrophilin Cirl-like [Solenopsis invicta]	3.3113547316387	14.592013926821	2.95277572571684	4.94179554503025	7.74063663562805e-07	6.8358045919021e-05
Contig63014	ref|XP_011051695.1| PREDICTED: katanin p60 ATPase-containing subunit A-like 1 [Acromyrmex echinatior]	1.28111029138658	14.5949228606544	2.96144493461298	4.92831140976853	8.2943342084066e-07	7.29287206375375e-05
Contig113378	#N/A	9.19213950518133	14.6916062948231	2.96535065476924	4.95442462131562	7.25446318486987e-07	6.42251807413883e-05
Contig101242	#N/A	0.640125547611134	14.7114769402936	2.95426627889599	4.97973965494785	6.36698651073197e-07	5.66521469147919e-05
Contig22946	ref|XP_014246261.1| PREDICTED: retrovirus-related Pol polyprotein from transposon TNT 1-94 [Cimex lectularius]	17.1470178676281	14.7305501612951	2.95026054854474	4.99296584790152	5.94590748450755e-07	5.30390713281858e-05
Contig69948	ref|XP_011636348.1| PREDICTED: probable RNA-binding protein 18 [Pogonomyrmex barbatus]	3.6675443356522	14.7306829381751	2.58383956760904	5.70108265344283	1.19048891970922e-08	1.37316337051554e-06
Contig134630	ref|XP_011704506.1| PREDICTED: uncharacterized protein LOC105459867 [Wasmannia auropunctata]	17.8200478868854	14.7899443968169	2.94283246688885	5.02575140216963	5.01465151774726e-07	4.49021049114787e-05
Contig55966	ref|XP_015751239.1| PREDICTED: delta(8)-fatty-acid desaturase 2-like [Acropora digitifera]	4.4968969459897	14.8053326528157	2.97132448801417	4.98273840926427	6.26906766334327e-07	5.58512265843262e-05
Contig57153	#N/A	1.28694167661285	14.807515845654	2.95646749115959	5.00851637636179	5.48512091423182e-07	4.90526031530515e-05
Contig138047	ref|XP_011174555.1| PREDICTED: UPF0668 protein C10orf76 homolog [Solenopsis invicta]	1.25053913618171	14.8620883235891	2.9491726943804	5.03940930685698	4.66970847568236e-07	4.19463317538773e-05
Contig105550	#N/A	0.206383289523844	14.8865053473398	2.96959281012185	5.01297864697113	5.35938463038991e-07	4.79585161570743e-05
Contig36914	#N/A	13.69413888109	14.9375465172813	2.86533949318097	5.21318557637939	1.85625031944512e-07	1.73927454500423e-05
Contig140097	ref|XP_011863749.1| PREDICTED: THUMP domain-containing protein 3-like [Vollenhovia emeryi]	3.31906956627152	14.9453889922374	2.00455354181491	7.45571953079683	8.9378696912516e-14	2.48112804275988e-11
Contig136925	ref|XP_011860511.1| PREDICTED: activating transcription factor 7-interacting protein 1 isoform X2 [Vollenhovia emeryi]	5.23438114992523	14.9515618309281	2.95308335703488	5.06303413187111	4.12635941008714e-07	3.71838141305537e-05
Contig128609	#N/A	0.287139993927641	15.0680605930228	2.96927902585475	5.07465295845184	3.88203851364561e-07	3.50716365641038e-05
Contig10816	#N/A	0.849983004301948	15.1146884979475	2.95136560542959	5.12125250431231	3.03512904016245e-07	2.77216954096855e-05
Contig140133	ref|XP_011172194.1| PREDICTED: cholesterol desaturase daf-36 [Solenopsis invicta]	2.76527319604639	15.1257145824409	2.94848031673666	5.13000358068587	2.89736667228649e-07	2.65148457703409e-05
Contig5965	ref|XP_011873944.1| PREDICTED: chymotrypsin-1-like [Vollenhovia emeryi]	65.0600838349681	15.1348675219366	2.95395919930111	5.12358719291634	2.99776921252296e-07	2.7398175706459e-05
Contig30651	#N/A	3.47669149780496	15.1456192239619	2.95269329489047	5.12942514218149	2.90628311346907e-07	2.65792288080155e-05
Contig91636	ref|XP_015438077.1| PREDICTED: RNA-directed DNA polymerase from mobile element jockey-like [Dufourea novaeangliae]	1.85494424793589	15.2456211830313	2.95437200099677	5.16035935145864	2.46476275614524e-07	2.26292126806403e-05
Contig34835	ref|XP_011880162.1| PREDICTED: spatacsin isoform X1 [Vollenhovia emeryi]	3.3278586027059	15.3305065363715	2.96865083202937	5.16413259887879	2.41556422466863e-07	2.21919361672954e-05
Contig67094	ref|XP_011859285.1| PREDICTED: uncharacterized protein LOC105556783 [Vollenhovia emeryi]	5.08852256847584	15.3466576280271	2.95262928133301	5.19762427509985	2.01851592131981e-07	1.88755952438601e-05
Contig16246	ref|XP_011860974.1| PREDICTED: beta-1,4-glucuronyltransferase 1-like [Vollenhovia emeryi]	2.56643679713925	15.3983197858332	2.23636056529713	6.885437001876	5.76104055680453e-12	1.13689629546761e-09
Contig137723	ref|XP_011067182.1| PREDICTED: mitochondrial import receptor subunit TOM40 homolog 1 [Acromyrmex echinatior]	0.433273335440572	15.4056050234732	2.96904827233358	5.18873511321015	2.11727317917564e-07	1.9630206587794e-05
Contig121177	ref|XP_011687748.1| PREDICTED: O-glucosyltransferase rumi homolog isoform X1 [Wasmannia auropunctata]	2.15937150941707	15.553623590848	2.96075839195943	5.25325660921442	1.49433108113705e-07	1.40575565094155e-05
Contig88974	#N/A	0.387646118091259	15.6179869014413	2.96915905083221	5.26007082613639	1.43999925034966e-07	1.35645049384437e-05
Contig139365	ref|XP_012223069.1| PREDICTED: mitogen-activated protein kinase 14A-like isoform X3 [Linepithema humile]	0.560112024576794	15.6296722801332	2.96910756435408	5.26409769311721	1.40879527184485e-07	1.32794226501575e-05
Contig65871	ref|XP_014364204.1| PREDICTED: 40S ribosomal protein S27 [Papilio machaon]	0.272230505559798	15.6415222126619	2.96959770358009	5.26721925795024	1.38505744169627e-07	1.30731103099104e-05
Contig80028	#N/A	0.272230505559798	15.6415222126619	2.96959770358009	5.26721925795024	1.38505744169627e-07	1.30731103099104e-05
Contig93370	#N/A	0.272230505559798	15.6415222126619	2.96959770358009	5.26721925795024	1.38505744169627e-07	1.30731103099104e-05
Contig57789	ref|XP_011686422.1| PREDICTED: uncharacterized protein LOC105449120 [Wasmannia auropunctata]	4.89952470405849	15.6506960194971	2.9507584513796	5.30395702575377	1.13319000409491e-07	1.08479910574931e-05
Contig38185	ref|XP_014675694.1| PREDICTED: 60S ribosomal protein L10a-2-like [Priapulus caudatus]	0.223408814591758	15.6669118257507	2.96971874135932	5.27555408111796	1.3235557042724e-07	1.25260850868438e-05
Contig83689	#N/A	0.223408814591758	15.6669118257507	2.96971874135932	5.27555408111796	1.3235557042724e-07	1.25260850868438e-05
Contig97550	#N/A	0.223408814591758	15.6669118257507	2.96971874135932	5.27555408111796	1.3235557042724e-07	1.25260850868438e-05
Contig59163	#N/A	8.64993224170566	15.713583088748	2.95053282741951	5.32567641434812	1.00578044809922e-07	9.67418379680566e-06
Contig34513	#N/A	0.359524067371657	15.7686317575681	2.96928034030013	5.31059042945545	1.09270648530176e-07	1.04817480145067e-05
Contig2545	ref|NP_001164361.1| ATP synthase subunit beta, mitochondrial [Tribolium castaneum]	0.741837538535348	15.7896436345293	2.96674567859041	5.32221003926143	1.02514107866026e-07	9.85369789057538e-06
Contig91452	ref|XP_012525761.1| PREDICTED: origin recognition complex subunit 3 isoform X2 [Monomorium pharaonis]	5.08050707003458	15.7922858636959	2.94027146443434	5.37102987078581	7.82882385401311e-08	7.64999532572953e-06
Contig74993	#N/A	0.181874621209956	15.82466683479	2.96971243885321	5.32868658519036	9.89255353592737e-08	9.52171755426382e-06
Contig96566	#N/A	0.181874621209956	15.82466683479	2.96971243885321	5.32868658519036	9.89255353592737e-08	9.52171755426382e-06
Contig39036	ref|XP_011494626.1| PREDICTED: 40S ribosomal protein S15 [Ceratosolen solmsi marchali]	0.310702376403618	15.8980325917995	2.96935437574556	5.35403679724411	8.60133564539649e-08	8.3874597839033e-06
Contig84883	ref|XP_011056999.1| PREDICTED: uncharacterized protein LOC105147579 isoform X1 [Acromyrmex echinatior]	0.310702376403618	15.8980325917995	2.96935437574556	5.35403679724411	8.60133564539649e-08	8.3874597839033e-06
Contig45232	ref|XP_012151025.1| PREDICTED: uncharacterized protein K02A2.6-like [Megachile rotundata]	0.261880685435579	15.9546207414539	2.96947686336145	5.37287255486248	7.74921011631313e-08	7.57744042771416e-06
Contig77367	#N/A	0.261880685435579	15.9546207414539	2.96947686336145	5.37287255486248	7.74921011631313e-08	7.57744042771416e-06
Contig82587	#N/A	0.261880685435579	15.9546207414539	2.96947686336145	5.37287255486248	7.74921011631313e-08	7.57744042771416e-06
Contig37815	#N/A	0.21305899446754	15.9599621389652	2.96971426601463	5.37424166412602	7.69056560894452e-08	7.54097049859149e-06
Contig94396	#N/A	0.21305899446754	15.9599621389652	2.96971426601463	5.37424166412602	7.69056560894452e-08	7.54097049859149e-06
Contig46943	ref|XP_005107086.1| PREDICTED: 60S ribosomal protein L11 isoform X2 [Aplysia californica]	0.600705112558799	15.9728459233631	2.96892668182816	5.38000686279243	7.44829992541371e-08	7.31865392601656e-06
Contig33376	ref|XP_011705674.1| PREDICTED: transmembrane protein 43 homolog isoform X1 [Wasmannia auropunctata]	25.9168185222117	15.9805544661362	2.06928628959025	7.72273732567986	1.13857656154313e-14	3.61522364980583e-12
Contig65976	ref|XP_011873888.1| PREDICTED: thyrotropin-releasing hormone receptor-like isoform X2 [Vollenhovia emeryi]	2.55772452006215	15.9950854928562	2.9487571274707	5.42434822584931	5.81663889194393e-08	5.8496343453025e-06
Contig74995	ref|XP_011312957.1| PREDICTED: elongation factor 1-gamma [Fopius arisanus]	0.529427409926259	16.0123897275171	2.96906088605011	5.39308230516591	6.92592085413444e-08	6.83388155675024e-06
Contig98649	#N/A	0.220346492053776	16.0806962102901	2.96959222130394	5.41511932006246	6.12478482812844e-08	6.11280863360549e-06
Contig122083	#N/A	0.217405925630026	16.1693701298671	2.96959715110193	5.44497091932727	5.1813849949388e-08	5.25189494712961e-06
Contig40462	ref|YP_009158746.1| NADH dehydrogenase subunit 4L (mitochondrion) [Petrosia ficiformis]	0.693429281953075	16.1736530259928	2.96907516984792	5.44737067967909	5.11198568260095e-08	5.18527093319789e-06
Contig33882	#N/A	0.25153086531136	16.1994509609468	2.96959389656819	5.45510649778332	4.89435028785788e-08	4.978812185914e-06
Contig92393	ref|XP_011566071.1| PREDICTED: phosphoenolpyruvate carboxykinase [ATP]-like [Plutella xylostella]	0.25153086531136	16.1994509609468	2.96959389656819	5.45510649778332	4.89435028785788e-08	4.978812185914e-06
Contig32755	#N/A	0.188264955020717	16.3250405605452	2.96971235210251	5.49717906146273	3.85914788469018e-08	4.01536096217282e-06
Contig52511	#N/A	0.188264955020717	16.3250405605452	2.96971235210251	5.49717906146273	3.85914788469018e-08	4.01536096217282e-06
Contig46959	ref|XP_012533378.1| PREDICTED: 1,2-dihydroxy-3-keto-5-methylthiopentene dioxygenase [Monomorium pharaonis]	0.436467809059298	16.3293295366743	2.96908470539021	5.49978567705709	3.8025316284042e-08	3.96228843288074e-06
Contig60410	#N/A	0.436467809059298	16.3293295366743	2.96908470539021	5.49978567705709	3.8025316284042e-08	3.96228843288074e-06
Contig88917	#N/A	0.33882442712322	16.3485726422662	2.96927953715252	5.50590553624469	3.67275440848273e-08	3.84691756601471e-06
Contig34079	ref|XP_012521573.1| PREDICTED: catalase-B-like, partial [Monomorium pharaonis]	0.4645898597789	16.3539310353739	2.96907428130743	5.50809090171109	3.62746090499589e-08	3.80229483303564e-06
Contig89830	ref|XP_011164282.1| PREDICTED: putative sodium-dependent multivitamin transporter [Solenopsis invicta]	0.4645898597789	16.3539310353739	2.96907428130743	5.50809090171109	3.62746090499589e-08	3.80229483303564e-06
Contig111914	ref|XP_011051521.1| PREDICTED: phosphatidylinositol 5-phosphate 4-kinase type-2 alpha isoform X2 [Acromyrmex echinatior]	0.381632582841541	16.3651913345175	2.96897512818389	5.5120675074594	3.54642835344998e-08	3.74794081568753e-06
Contig99707	#N/A	0.872588879862966	16.4048901145185	2.96876912654912	5.52582212197398	3.27946269411857e-08	3.49983565174374e-06
Contig34020	#N/A	0.257390432723982	16.4385906966423	2.96916019726469	5.53644451780884	3.08673559289838e-08	3.31241790325217e-06
Contig35097	ref|XP_011875915.1| PREDICTED: DNA polymerase theta-like [Vollenhovia emeryi]	0.851935499040074	16.4395798172044	2.96874666630836	5.53754889353594	3.06734079536613e-08	3.29586351606729e-06
Contig47692	ref|XP_011670498.1| PREDICTED: aconitate hydratase, mitochondrial [Strongylocentrotus purpuratus]	0.415768168810861	16.449201073386	2.96919507730445	5.53995296540746	3.02552895667737e-08	3.25341069247825e-06
Contig41325	ref|XP_015838201.1| PREDICTED: LOW QUALITY PROTEIN: dihydrolipoyllysine-residue acetyltransferase component of pyruvate dehydrogenase complex, mitochondrial [Tribolium castaneum]	0.215989252984502	16.4818267758733	2.9693491007644	5.55065309485851	2.84604347848047e-08	3.07444499525119e-06
Contig45856	ref|XP_011882441.1| PREDICTED: LOW QUALITY PROTEIN: xanthine dehydrogenase/oxidase-like [Vollenhovia emeryi]	0.215989252984502	16.4818267758733	2.9693491007644	5.55065309485851	2.84604347848047e-08	3.07444499525119e-06
Contig57902	ref|XP_011166588.1| PREDICTED: putative fatty acyl-CoA reductase CG5065 [Solenopsis invicta]	0.543514814075064	16.7121882380054	2.96893987385226	5.6290086522773	1.8124830730002e-08	2.02289431884446e-06
Contig81985	ref|XP_011878804.1| PREDICTED: RCC1 domain-containing protein 1 [Vollenhovia emeryi]	0.977749446348212	16.7160128231728	2.96873014413591	5.63069461068792	1.79485288742865e-08	2.00480101529649e-06
Contig105360	ref|XP_016772395.1| PREDICTED: ultrabithorax isoform X2 [Apis mellifera]	1.52561435934509	16.7530215572115	2.96132888821066	5.65726475836806	1.53804410415552e-08	1.74139140100578e-06
Contig87286	#N/A	0.490194416973435	17.0685369333701	2.96913160490431	5.74866297781375	8.99519140174442e-09	1.04522496668773e-06
Contig21716	#N/A	901.914686646386	17.5955226235341	1.99416306373943	8.82351245165436	1.10924352769396e-18	6.14638363657149e-16
Contig70321	#N/A	0.52896464279754	17.6468197492191	2.96652442322916	5.94865142893714	2.70360696078374e-09	3.38362757075165e-07
Contig147935	#N/A	0.260827200430223	17.7370575588864	2.96722702445326	5.97765435968105	2.26373395571395e-09	2.86868893937681e-07
Contig99433	#N/A	0.380402293101385	17.8367248423238	2.9672236615743	6.01125054147765	1.8409763072603e-09	2.35619954064274e-07
Contig131615	#N/A	0.256306382349636	17.8532527527436	2.96739286546601	6.01647761592896	1.78253133401706e-09	2.28346627291577e-07
Contig131660	ref|XP_015433584.1| PREDICTED: uncharacterized protein K02A2.6-like [Dufourea novaeangliae]	0.352794996410663	17.879496226279	2.966561371684	6.02701039558452	1.67020264420449e-09	2.14931350654063e-07
Contig81381	ref|XP_011861368.1| PREDICTED: enoyl-[acyl-carrier-protein] reductase [NADH], chloroplastic-like [Vollenhovia emeryi]	0.272510447009554	17.8903940970935	2.96701411592947	6.02976372813414	1.64199558204043e-09	2.11687089193036e-07
Contig51817	#N/A	0.566379537408635	17.9983875794628	2.96463713212337	6.07102548384116	1.27096015603685e-09	1.66588921305694e-07
Contig185	#N/A	0.346417427113272	18.1043442869555	2.96554713804578	6.10489176000276	1.02870371850339e-09	1.36481454754341e-07
Contig144232	#N/A	0.269045176221779	18.2056083902618	2.96567135909971	6.1387814716559	8.31568660878848e-10	1.11478327396773e-07
Contig32624	#N/A	0.291253046043513	18.2104713969626	2.96571278768723	6.14033546086026	8.23473921420621e-10	1.10498000640997e-07
Contig81183	#N/A	0.515460987546175	18.2136963252676	2.9653747545941	6.14212294653486	8.14257919731157e-10	1.09365210346248e-07
Contig110218	#N/A	0.335010226556722	18.2274690574762	2.96586764545909	6.14574594567075	7.95885850828876e-10	1.06999317854013e-07
Contig127722	ref|XP_011176121.1| PREDICTED: nucleolar complex protein 2 homolog isoform X2 [Solenopsis invicta]	1.08796035345843	18.2308139115118	2.96433295845012	6.15005607232586	7.74555588129329e-10	1.04429752801441e-07
Contig121505	ref|XP_011156953.1| PREDICTED: chymotrypsin-1-like [Solenopsis invicta]	0.367636592602696	18.2577366817946	2.96554038856403	6.15663059326442	7.43089024691274e-10	1.00860950933528e-07
Contig135291	#N/A	0.288487791823459	18.3013757431301	2.96585257248198	6.17069638354091	6.79898698152482e-10	9.29986895961773e-08
Contig93972	#N/A	0.312866859392877	18.3068384293651	2.96536943970343	6.17354390459893	6.67759954500667e-10	9.15154978574983e-08
Contig140206	ref|XP_012539298.1| PREDICTED: tektin-1 [Monomorium pharaonis]	0.241043173287753	18.3732255271338	2.96641512483629	6.19374725179361	5.87504103023738e-10	8.07515245573396e-08
Contig144445	#N/A	0.288162115604605	18.4059153314833	2.96548504589435	6.20671325150193	5.41041874690497e-10	7.48752142685045e-08
Contig36138	#N/A	0.28438562113846	18.429747108887	2.96549461906534	6.21472957340779	5.14131159112081e-10	7.14308656726251e-08
Contig88662	ref|XP_014675973.1| PREDICTED: S-adenosylmethionine synthase isoform type-2-like [Priapulus caudatus]	0.399050138009856	18.453418015835	2.96498803974677	6.22377485792862	4.853334037927e-10	6.77629979799379e-08
Contig69835	#N/A	0.174089301848048	18.515229970659	2.96924113651194	6.23567744060338	4.49827140135863e-10	6.31174035946147e-08
Contig50513	#N/A	0.277218347122385	18.5176733784994	2.96563775236635	6.24407797740087	4.26307290632438e-10	6.01757654790125e-08
Contig90375	#N/A	0.258614489219083	18.5442960405522	2.96553802389261	6.25326530671513	4.01958433164015e-10	5.68523731038798e-08
Contig122391	ref|XP_015792055.1| PREDICTED: 60S ribosomal protein L13a-like [Tetranychus urticae]	1.08092798256053	18.5876077923733	2.96420252560538	6.2706942699798	3.59441771914124e-10	5.09920120945281e-08
Contig104436	#N/A	0.364907856368139	18.6121159778111	2.96496855161347	6.27734009781749	3.44414171531227e-10	4.89184929557228e-08
Contig33068	#N/A	0.351309684571069	18.6132045917778	2.96515587608619	6.2773106607623	3.44479362555073e-10	4.89184929557228e-08
Contig24681	#N/A	0.30993697509169	18.6527823530393	2.96550370322001	6.28992043840163	3.17628719685606e-10	4.52875733657084e-08
Contig136093	#N/A	0.278615526983221	18.6755584714073	2.96484987694932	6.29898957670783	2.99592135187947e-10	4.28890272802952e-08
Contig97050	#N/A	0.450853912625874	18.6760286710761	2.96486486418182	6.29911632624441	2.99347283308584e-10	4.28890272802952e-08
Contig33752	ref|XP_011691076.1| PREDICTED: uncharacterized protein LOC105452010 [Wasmannia auropunctata]	0.396142912582563	18.7427674861054	2.96365798950226	6.32420054962321	2.54546956645162e-10	3.68889449570168e-08
Contig87343	ref|XP_011165710.1| PREDICTED: uncharacterized protein LOC105200039 [Solenopsis invicta]	0.346730856911635	18.746090995324	2.9651613472936	6.32211498791936	2.58007264934417e-10	3.7237643016791e-08
Contig102038	#N/A	0.318119961403927	18.7576468784178	2.96546641774344	6.32536142246768	2.52640547225381e-10	3.66502581122225e-08
Contig46668	#N/A	0.585200894030185	18.767511803828	2.96455833000008	6.33062659415694	2.44167592851035e-10	3.54939798015152e-08
Contig145098	#N/A	0.151291546127411	18.7808996235921	2.97000863121237	6.32351684982332	2.55676309156804e-10	3.69389524079028e-08
Contig145772	#N/A	0.151291546127411	18.7808996235921	2.97000863121237	6.32351684982332	2.55676309156804e-10	3.69389524079028e-08
Contig78615	#N/A	0.258754207805822	18.7839068421716	2.96617669708553	6.33269988960134	2.40907873429105e-10	3.50561892810631e-08
Contig38762	#N/A	0.302012842055757	18.7919171122767	2.96640059648611	6.33492224028574	2.37461002875976e-10	3.46617017803376e-08
Contig69345	#N/A	0.532056888899518	18.8126765054885	2.96479443263616	6.34535612263718	2.21911505916376e-10	3.25601558166835e-08
Contig91227	#N/A	0.2430598421415	18.8160088773826	2.96603362070511	6.34382858846673	2.24124191565574e-10	3.28507011365569e-08
Contig132475	ref|XP_011859385.1| PREDICTED: uncharacterized protein LOC105556883 [Vollenhovia emeryi]	0.426575244711301	18.858878258133	2.96590334256461	6.35856131502443	2.03652093713216e-10	3.00998220558539e-08
Contig49191	ref|XP_012535126.1| PREDICTED: protein polybromo-1 isoform X5 [Monomorium pharaonis]	0.331900060989594	18.8612573876337	2.96482392585085	6.36167875710219	1.99560478370023e-10	2.96501544818603e-08
Contig131329	#N/A	0.150025444394527	18.8811320408081	2.97015470392194	6.35695238900399	2.05795742740715e-10	3.03531535094308e-08
Contig135328	ref|XP_011057979.1| PREDICTED: uncharacterized protein LOC105148146 [Acromyrmex echinatior]	0.591205531185635	18.9042321522277	2.96463941243585	6.37657047697929	1.81097432786886e-10	2.70902648130025e-08
Contig40277	#N/A	0.186985705366337	18.9212711627759	2.96741976347978	6.37633792011538	1.81372502693619e-10	2.70902648130025e-08
Contig46194	#N/A	0.186985705366337	18.9212711627759	2.96741976347978	6.37633792011538	1.81372502693619e-10	2.70902648130025e-08
Contig62763	#N/A	0.407436374360208	18.9330050458891	2.96467546476494	6.38619817612658	1.70060587983007e-10	2.55900435572257e-08
Contig13501	ref|XP_012248894.1| PREDICTED: uncharacterized protein LOC105681941 [Bombus impatiens]	0.421894354002211	18.9530104297272	2.96487489085504	6.39251608497427	1.63178055201674e-10	2.45805646757259e-08
Contig117397	ref|XP_012522724.1| PREDICTED: cytochrome P450 4c3-like, partial [Monomorium pharaonis]	0.196757853533214	19.0816002174784	2.96732596156224	6.43057098028835	1.27125499031415e-10	1.93352547218966e-08
Contig149257	#N/A	0.315726556552175	19.0822297470529	2.9646359713544	6.43661816541176	1.2216473703212e-10	1.87015285465087e-08
Contig115268	#N/A	0.374220766763009	19.0962796558536	2.96327166249783	6.44432297501767	1.16117576769941e-10	1.77950816104798e-08
Contig115108	#N/A	0.18518401390627	19.1300604375584	2.96770750635597	6.4460734073649	1.147850824543e-10	1.76099758909286e-08
Contig129323	#N/A	0.18518401390627	19.1300604375584	2.96770750635597	6.4460734073649	1.147850824543e-10	1.76099758909286e-08
Contig130690	#N/A	0.18518401390627	19.1300604375584	2.96770750635597	6.4460734073649	1.147850824543e-10	1.76099758909286e-08
Contig39971	ref|XP_011696238.1| PREDICTED: nuclear transcription factor Y subunit alpha [Wasmannia auropunctata]	0.18518401390627	19.1300604375584	2.96770750635597	6.4460734073649	1.147850824543e-10	1.76099758909286e-08
Contig33050	#N/A	0.151444093039479	19.1727624922938	2.96762013827193	6.46065250907021	1.04252465667262e-10	1.6081398080117e-08
Contig33857	#N/A	0.151444093039479	19.1727624922938	2.96762013827193	6.46065250907021	1.04252465667262e-10	1.6081398080117e-08
Contig60920	#N/A	0.151444093039479	19.1727624922938	2.96762013827193	6.46065250907021	1.04252465667262e-10	1.6081398080117e-08
Contig54765	#N/A	0.110042913299999	19.220819847151	2.97144344139007	6.46851277039933	9.89721546997266e-11	1.53844538422522e-08
Contig76674	#N/A	0.110042913299999	19.220819847151	2.97144344139007	6.46851277039933	9.89721546997266e-11	1.53844538422522e-08
Contig83572	ref|XP_011639943.1| PREDICTED: serine/threonine-protein phosphatase 4 regulatory subunit 1-like isoform X2 [Pogonomyrmex barbatus]	0.110042913299999	19.220819847151	2.97144344139007	6.46851277039933	9.89721546997266e-11	1.53844538422522e-08
Contig88668	#N/A	0.110042913299999	19.220819847151	2.97144344139007	6.46851277039933	9.89721546997266e-11	1.53844538422522e-08
Contig143831	ref|XP_008213316.1| PREDICTED: uncharacterized protein LOC100118491 isoform X1 [Nasonia vitripennis]	0.655692439900866	19.2232012618953	2.96420946681129	6.48510217551339	8.86716723783293e-11	1.39989288179227e-08
Contig1925	ref|XP_012533763.1| PREDICTED: protein kinase C theta type-like [Monomorium pharaonis]	1.037877173582	19.2670984614065	2.96370688354434	6.50101350048651	7.9780670856747e-11	1.27232160835731e-08
Contig83739	ref|XP_012235031.1| PREDICTED: putative nuclease HARBI1 isoform X1 [Linepithema humile]	0.665186289503717	19.3581527822842	2.96403391156976	6.5310159599463	6.53250365631617e-11	1.06201165590158e-08
Contig53653	#N/A	0.204757935961721	19.4175319935158	2.96706327251758	6.54436060510427	5.97504657210646e-11	9.78280597333634e-09
Contig79373	#N/A	0.204757935961721	19.4175319935158	2.96706327251758	6.54436060510427	5.97504657210646e-11	9.78280597333634e-09
Contig96144	ref|XP_011568119.1| PREDICTED: uncharacterized protein LOC105397800 [Plutella xylostella]	0.472181503177765	19.4199159119135	2.96642340468417	6.54657588031709	5.88712434740973e-11	9.6612428445523e-09
Contig37807	#N/A	0.194818031965488	19.4707691743821	2.96707798457305	6.56227078479835	5.29944657430928e-11	8.78868430293636e-09
Contig67727	#N/A	0.194818031965488	19.4707691743821	2.96707798457305	6.56227078479835	5.29944657430928e-11	8.78868430293636e-09
Contig50382	#N/A	0.164832921121897	19.48949919885	2.96859624072042	6.56522397068057	5.19547113706493e-11	8.65689251478613e-09
Contig89345	#N/A	1.19821753386599	19.5598504618273	2.96379027195637	6.59960680986917	4.12249655751999e-11	6.94274607971278e-09
Contig65300	ref|XP_012536987.1| PREDICTED: uncharacterized protein LOC105837060 isoform X2 [Monomorium pharaonis]	0.568809590270311	19.5847137799497	2.96467243650647	6.6060295696708	3.94764073488736e-11	6.6641552319878e-09
Contig136679	ref|XP_013785591.1| PREDICTED: 60S ribosomal protein L4-like [Limulus polyphemus]	2.58493862551575	19.5916564715095	2.96289216447727	6.61234205766851	3.78286640057533e-11	6.40896491369416e-09
Contig73079	ref|XP_011702293.1| PREDICTED: neuropeptide-like protein 32 [Wasmannia auropunctata]	0.227037899694897	19.6405723587627	2.96728620673183	6.6190353711767	3.61550342450764e-11	6.14753053396697e-09
Contig64939	#N/A	0.243229806805541	19.6561638185678	2.96653031626596	6.62597773256857	3.44957173502708e-11	5.89586991116103e-09
Contig104237	#N/A	0.267041420459774	19.6714936373097	2.96691599173021	6.63028332859467	3.35043141262082e-11	5.7382534219283e-09
Contig85907	#N/A	0.202318152941471	19.7009367966232	2.96756477769967	6.63875543498482	3.16342764412806e-11	5.45766588317903e-09
Contig120740	#N/A	0.20354066419893	19.7100165206968	2.96638724621168	6.6444516122661	3.0434806934245e-11	5.26829169566871e-09
Contig150170	#N/A	0.20354066419893	19.7100165206968	2.96638724621168	6.6444516122661	3.0434806934245e-11	5.26829169566871e-09
Contig33496	#N/A	0.208057130011424	19.7357299189845	2.96742065699798	6.65080290266306	2.91498425451805e-11	5.06615658315666e-09
Contig57799	ref|XP_011068076.1| PREDICTED: centromere protein L-like isoform X1 [Acromyrmex echinatior]	0.1662860651179	19.7945989637044	2.96802192300459	6.66929001106094	2.57043872537213e-11	4.50614492033383e-09
Contig80041	#N/A	0.1662860651179	19.7945989637044	2.96802192300459	6.66929001106094	2.57043872537213e-11	4.50614492033383e-09
Contig60766	ref|XP_011163224.1| PREDICTED: homeobox protein OTX2-A-like isoform X2 [Solenopsis invicta]	0.122571827769506	19.8619294391133	2.97019267554204	6.68708451228289	2.27660420689382e-11	4.03104441881548e-09
Contig70961	ref|XP_012536311.1| PREDICTED: uncharacterized protein LOC105836666 isoform X1 [Monomorium pharaonis]	0.122571827769506	19.8619294391133	2.97019267554204	6.68708451228289	2.27660420689382e-11	4.03104441881548e-09
Contig42654	ref|XP_011860409.1| PREDICTED: uncharacterized protein LOC105557704 [Vollenhovia emeryi]	3.00397360018858	19.870728712107	2.96320932896246	6.70581336184728	2.00287583781097e-11	3.57323670776738e-09
Contig126878	ref|XP_011067131.1| PREDICTED: uncharacterized protein LOC105153781 isoform X2 [Acromyrmex echinatior]	1.81442180991619	19.900623387845	2.96334069895135	6.71560424857233	1.87288470533915e-11	3.36683193651789e-09
Contig58771	#N/A	2.0436555886477	19.9303681338218	2.96741394660472	6.71640980747762	1.86256503606573e-11	3.35254588408891e-09
Contig106000	#N/A	0.229976601477231	19.9510775222711	2.96655334816296	6.72533920033017	1.75183858397425e-11	3.15726449489553e-09
Contig94157	#N/A	0.358806516980447	19.96044093246	2.9655404730377	6.73079363237077	1.68740150751539e-11	3.04501622997959e-09
Contig45851	#N/A	0.767053111695661	19.9698728430087	2.95883886094248	6.74922622742887	1.48635682781266e-11	2.69599179331765e-09
Contig2017	ref|XP_009020916.1| hypothetical protein HELRODRAFT_93044, partial [Helobdella robusta]	558.671183920128	2.30246994918524	0.646035237818531	3.56400055972178	0.000365245173730511	0.0191507179507689
Contig129253	ref|XP_011304975.1| PREDICTED: pre-mRNA-processing factor 6 [Fopius arisanus]	3.14739259162698	2.32793518333706	0.669943850508445	3.47482133251959	0.000511193705753567	0.0257596779749864
Contig117819	ref|XP_011049318.1| PREDICTED: WD and tetratricopeptide repeats protein 1-like [Acromyrmex echinatior]	3.53891517900391	2.56128285846356	0.658085326007871	3.89202244335246	9.94120461125961e-05	0.00600539712679414
Contig96846	#N/A	3.54376874908334	2.59579215387692	0.691163937019043	3.75568228439761	0.000172869884858384	0.00980963699631931
Contig26299	ref|XP_009044647.1| hypothetical protein LOTGIDRAFT_202939 [Lottia gigantea]	329.914239259519	2.60434978951359	0.678769969596916	3.83686654708689	0.000124614144891792	0.0073303933516967
Contig128254	ref|XP_011050560.1| PREDICTED: band 7 protein AAEL010189-like isoform X5 [Acromyrmex echinatior]	1.61586371289987	2.64110401298629	0.787784611041892	3.35257121803036	0.000800646396571825	0.0379499945979232
Contig91644	ref|XP_011874188.1| PREDICTED: uncharacterized protein LOC105565527 [Vollenhovia emeryi]	13.9972086743425	2.72226992846988	0.743640565036409	3.6607335001105	0.000251494240747701	0.0137043508426255
Contig136707	#N/A	0.301237788483031	20.012454134164	2.9641745844724	6.75144245517715	1.46382444592784e-11	2.66195627717203e-09
Contig1525	ref|XP_012532092.1| PREDICTED: uncharacterized protein LOC105834282 [Monomorium pharaonis]	0.176449831203513	20.0305680305041	2.96716393147893	6.75074532215691	1.47087588829205e-11	2.67134126462726e-09
Contig65362	ref|XP_012223904.1| PREDICTED: LOW QUALITY PROTEIN: sterile alpha and TIR motif-containing protein 1 [Linepithema humile]	0.210347213209279	20.0535611751226	2.96621340451506	6.76066028984894	1.3736426303412e-11	2.50440751921703e-09
Contig93734	#N/A	0.210347213209279	20.0535611751226	2.96621340451506	6.76066028984894	1.3736426303412e-11	2.50440751921703e-09
Contig78582	#N/A	0.263733227941183	20.0583629947544	2.96533088880065	6.76429165814514	1.33962978978886e-11	2.4487150117438e-09
Contig130123	ref|XP_011880608.1| PREDICTED: protein-cysteine N-palmitoyltransferase Rasp isoform X1 [Vollenhovia emeryi]	1.14009737621113	20.1092941364331	2.96363129930778	6.78535624223231	1.15800409009111e-11	2.14165581043984e-09
Contig54821	#N/A	0.412495206021272	20.1302448847398	2.96670722349291	6.78538304195691	1.15778913788784e-11	2.14165581043984e-09
Contig142186	ref|XP_011169215.1| PREDICTED: uncharacterized protein LOC105202410 [Solenopsis invicta]	0.378624602012249	20.14467899127	2.96481421807256	6.79458391304066	1.08625576380112e-11	2.02219605609758e-09
Contig126209	#N/A	0.291505777092149	20.1656214978785	2.96475989110113	6.80177223066416	1.03339895037894e-11	1.9288794120435e-09
Contig45274	ref|XP_014680357.1| PREDICTED: LOW QUALITY PROTEIN: NADH-quinone oxidoreductase subunit F-like, partial [Priapulus caudatus]	0.276059314121909	20.1686112296021	2.96600875585434	6.79991628136399	1.04679964020101e-11	1.95131462746018e-09
Contig45933	#N/A	0.407304864250502	20.1748074343442	2.96411180350735	6.80635845465476	1.00100120613195e-11	1.87332056084351e-09
Contig132813	#N/A	0.245503085872513	20.2501157461073	2.96548942765173	6.82859144844183	8.57524000880007e-12	1.61769784716078e-09
Contig84408	#N/A	0.217767724437838	20.2872257033386	2.96755117576757	6.83635243395296	8.12349525260031e-12	1.54070538081432e-09
Contig116241	#N/A	0.370610879524204	20.3031352752272	2.96563837715599	6.84612642985074	7.58764273592398e-12	1.4487988589971e-09
Contig17442	ref|XP_011049164.1| PREDICTED: zinc finger protein 330 homolog [Acromyrmex echinatior]	0.55387661870966	20.3143498506196	2.96494496104064	6.8515099327475	7.30745237948918e-12	1.39908007976244e-09
Contig85174	#N/A	0.369960631622162	20.3185291601375	2.964993672921	6.85280692019842	7.24147976900899e-12	1.39021653114357e-09
Contig72506	ref|XP_011176176.1| PREDICTED: uncharacterized protein LOC105208112 [Solenopsis invicta]	0.208962049709345	20.3322921449645	2.96714982325382	6.85246561721234	7.25878369474283e-12	1.3916477065347e-09
Contig102813	ref|XP_011171501.1| PREDICTED: uncharacterized protein LOC105204134 [Solenopsis invicta]	0.338648779585478	20.3413247765764	2.96305588820391	6.86498181068956	6.64997257882741e-12	1.28891793617363e-09
Contig62263	ref|XP_003493074.1| PREDICTED: acetolactate synthase large subunit-like [Bombus impatiens]	0.370847848400251	20.3456114532229	2.96499107872882	6.86194693777821	6.79282976009464e-12	1.31480337892067e-09
Contig45876	#N/A	0.342261476279966	20.3789600869917	2.96571022160826	6.87152775025355	6.35179319124524e-12	1.23962613610964e-09
Contig93853	ref|XP_011169438.1| PREDICTED: fatty acid synthase-like [Solenopsis invicta]	0.323976597162696	20.4206319761387	2.96416511599987	6.88916817282308	5.61195649129212e-12	1.11057789404776e-09
Contig79901	ref|XP_011164672.1| PREDICTED: alpha-tocopherol transfer protein-like isoform X2 [Solenopsis invicta]	0.358159797531533	20.4431739229926	2.9667462308466	6.89077269583616	5.54901440869769e-12	1.09966211627736e-09
Contig60723	#N/A	0.317360514330784	20.4642688076502	2.96567633176761	6.90037162465838	5.18666742666277e-12	1.03074619885397e-09
Contig87349	#N/A	0.711777701462183	20.4680867518863	2.96200545387893	6.91021237826623	4.83928661998183e-12	9.65786273366628e-10
Contig129353	ref|XP_011858818.1| PREDICTED: uncharacterized protein LOC105556344 [Vollenhovia emeryi]	0.275661902460857	20.471134913083	2.96553353324615	6.90301919826032	5.09087465729853e-12	1.01313424852438e-09
Contig139808	#N/A	0.279736832097479	20.4723789810914	2.96566192782616	6.90313983161853	5.08655153901845e-12	1.01313424852438e-09
Contig39382	#N/A	0.335176833146859	20.5047827284725	2.9653719002003	6.91474237247863	4.68714395092559e-12	9.3940337423253e-10
Contig32106	#N/A	0.309019858704409	20.513404268056	2.96531873219355	6.91777381141135	4.58796040814709e-12	9.21201162218629e-10
Contig70644	#N/A	0.270881500450311	20.525890629945	2.96619118346835	6.91994863457998	4.51807435885891e-12	9.0938796678588e-10
Contig85143	#N/A	0.270881500450311	20.525890629945	2.96619118346835	6.91994863457998	4.51807435885891e-12	9.0938796678588e-10
Contig128112	ref|XP_011860409.1| PREDICTED: uncharacterized protein LOC105557704 [Vollenhovia emeryi]	0.246702520670412	20.5281924927334	2.96603543417949	6.9210880814754	4.48187692988754e-12	9.05973912106323e-10
Contig149201	#N/A	0.218155570921788	20.5338445079974	2.96656929864372	6.92174779715588	4.46104949412445e-12	9.03055745517624e-10
Contig40043	#N/A	0.284246522901806	20.5658178603512	2.96548612644001	6.93505785678383	4.06054942613202e-12	8.24344040609449e-10
Contig120060	#N/A	0.46110085964005	20.5742757148507	2.96212190458589	6.94578966618425	3.7634914612638e-12	7.69565923302737e-10
Contig52048	ref|XP_011880629.1| PREDICTED: endothelin-converting enzyme 1 [Vollenhovia emeryi]	0.418841914138403	20.5745335790224	2.96441388657167	6.94050640911576	3.90696851332857e-12	7.97749898884086e-10
Contig88290	#N/A	0.331579599830867	20.5807900823011	2.96576614037933	6.93945142946058	3.93625422476871e-12	8.02569860313341e-10
Contig78757	#N/A	0.288798641189597	20.6016485185716	2.96428582603844	6.94995345509724	3.65406751463285e-12	7.53735441773836e-10
Contig61599	#N/A	0.46339531762476	20.605754391966	2.96450585849316	6.95082262459745	3.63162253018186e-12	7.50200831355419e-10
Contig99968	#N/A	0.235281403101956	20.6115780752587	2.96620773330372	6.94879790239835	3.68411863636379e-12	7.58826400819671e-10
Contig33449	ref|XP_001605621.1| PREDICTED: ATP-binding cassette sub-family F member 3 [Nasonia vitripennis]	0.397053792988818	20.6216038560554	2.96382400233664	6.95776936815331	3.45702533353527e-12	7.20453257452113e-10
Contig72594	#N/A	0.434119507909432	20.6251315599163	2.96512869114501	6.9558976045494	3.50324251832313e-12	7.27937732516917e-10
Contig91372	#N/A	0.234758783635681	20.6317125385126	2.96548830304162	6.95727328189128	3.46921603277175e-12	7.2192903944411e-10
Contig75917	#N/A	0.236764779332975	20.6322476066315	2.96656024534483	6.95493969455296	3.52712883627914e-12	7.30751793518671e-10
Contig90693	ref|XP_011698761.1| PREDICTED: nitric oxide-associated protein 1 [Wasmannia auropunctata]	0.236764779332975	20.6322476066315	2.96656024534483	6.95493969455296	3.52712883627914e-12	7.30751793518671e-10
Contig91401	ref|XP_011705119.1| PREDICTED: cytochrome P450 6g1-like, partial [Wasmannia auropunctata]	0.358080325692096	20.6488589767197	2.96506898247537	6.96403999325542	3.30650674788966e-12	6.93174308540898e-10
Contig32036	#N/A	0.254739622715265	20.6511262244897	2.96571585496418	6.9632855048884	3.32427149562587e-12	6.95866058544368e-10
Contig136771	ref|XP_011157186.1| PREDICTED: restin homolog [Solenopsis invicta]	0.402087444286625	20.6925421256985	2.96525154029504	6.97834293128455	2.9868188456441e-12	6.32726450424249e-10
Contig140383	#N/A	0.304996473177337	20.7039900525017	2.96546656551049	6.98169734681787	2.91634870287896e-12	6.2058934137152e-10
Contig68801	#N/A	0.250806858643371	20.7087480808583	2.96683456201073	6.98008185088122	2.95008138452714e-12	6.26823532916588e-10
Contig105540	#N/A	0.252150235832841	20.7292646628772	2.96670045272495	6.98731300756606	2.80200652412899e-12	5.98963866626103e-10
Contig93736	#N/A	0.400714485313438	20.742802174927	2.96500932285644	6.99586406525822	2.63629052213727e-12	5.6697099224723e-10
Contig32959	#N/A	0.313377097773684	20.7471743715796	2.96579852319558	6.99547666819426	2.64358576896246e-12	5.67675894220499e-10
Contig60809	ref|XP_012794736.1| ADP,ATP carrier protein [Schistosoma haematobium]	0.411600851836469	20.7576445479454	2.96498957695068	7.00091653249367	2.54293415345741e-12	5.47727083965049e-10
Contig88849	#N/A	0.317895549828604	20.7676169257912	2.96531153760818	7.00351941521203	2.49611302265022e-12	5.38463025589935e-10
Contig75945	#N/A	0.364793591379915	20.7960305552201	2.96257795108214	7.01957244622846	2.22548200068304e-12	4.84520693760418e-10
Contig75571	#N/A	0.692996976704962	20.8091792841672	2.96495015726122	7.01839092748495	2.24437858708687e-12	4.87779385104352e-10
Contig100016	#N/A	0.481683486950091	20.814358678475	2.96149108308137	7.02833744710051	2.09008928571812e-12	4.59289806849322e-10
Contig21614	ref|XP_011864718.1| PREDICTED: general odorant-binding protein 69a-like [Vollenhovia emeryi]	0.330206210611852	20.8235062106644	2.96502779830257	7.02303911706513	2.17093399080828e-12	4.74105811590784e-10
Contig126434	#N/A	0.472702066651529	20.8253059128765	2.96430999596764	7.02534685684198	2.13535107872905e-12	4.67780932358416e-10
Contig33890	#N/A	0.436929178033016	20.8504783172797	2.96561628455948	7.03074043187516	2.05440379507874e-12	4.52151235254269e-10
Contig44260	#N/A	0.184465960054469	20.8541542185422	2.96761588662754	7.02724173721867	2.10656226394547e-12	4.6219088231165e-10
Contig57598	#N/A	0.333463120455868	20.856648474579	2.9654760591919	7.03315355048341	2.01916941847081e-12	4.45089830455024e-10
Contig54785	#N/A	0.339527026759127	20.8688814203488	2.96425658919785	7.04017374757564	1.92000264405683e-12	4.2588793343375e-10
Contig46100	#N/A	0.487034440587191	20.875446918545	2.96013907276509	7.05218451072473	1.76130430261341e-12	3.95655030280393e-10
Contig65368	#N/A	0.307483392334997	20.8755156432943	2.96546304743917	7.03954671137155	1.92866220078636e-12	4.26469769928811e-10
Contig94622	#N/A	0.553659811879494	20.8884542830745	2.9577106627098	7.06237244448277	1.6368354974755e-12	3.71235867234021e-10
Contig99131	ref|XP_006814771.1| PREDICTED: DNA polymerase subunit gamma-2, mitochondrial-like [Saccoglossus kowalevskii]	0.559978822098113	20.8894749398323	2.96463549195757	7.04622035204699	1.83843045872144e-12	4.11020108427156e-10
Contig47235	#N/A	0.313142162496944	20.8928721765985	2.96555446200359	7.04518242517213	1.85218684608941e-12	4.13441460966659e-10
Contig51242	#N/A	0.311505548855893	20.9260172486551	2.96540745609939	7.05670892059489	1.70492234102745e-12	3.83599382197701e-10
Contig53701	#N/A	0.715620021380123	20.9805187156166	2.96477278188029	7.07660257940934	1.47731410739428e-12	3.37767073515355e-10
Contig61260	ref|XP_015436739.1| PREDICTED: cystathionine beta-synthase [Dufourea novaeangliae]	0.625426425010597	20.9862970673183	2.96589409816106	7.07587539296512	1.48508262508172e-12	3.38447934961566e-10
Contig66713	ref|XP_017091282.1| PREDICTED: C-1-tetrahydrofolate synthase, cytoplasmic isoform X2 [Drosophila bipectinata]	0.509698548271662	20.9874425627455	2.96559230814745	7.07698172303934	1.47327955119969e-12	3.37390568469793e-10
Contig23677	ref|YP_008999618.1| cytochrome c oxidase subunit II (mitochondrion) [Antricola mexicanus]	0.80003335032909	20.987460494682	2.96382654707547	7.08120403179166	1.42907311744455e-12	3.27857910198105e-10
Contig45765	#N/A	0.338498423432379	20.999895448341	2.96559315157492	7.08117883169131	1.42933305506863e-12	3.27857910198105e-10
Contig82781	ref|XP_011050396.1| PREDICTED: zinc finger protein 346-like [Acromyrmex echinatior]	0.602660311380348	21.0060570486472	2.96431615622883	7.0863079177664	1.3773716589109e-12	3.18004057661982e-10
Contig83978	#N/A	0.316181491876941	21.0161170544768	2.96511106462959	7.0878009613789	1.36259748352547e-12	3.1510791592422e-10
Contig31603	#N/A	0.635593633065011	21.0163567708439	2.95982267708089	7.10054589877364	1.24265055459889e-12	2.89263254387413e-10
Contig46132	#N/A	0.492787228257848	21.0230928808635	2.96119594988494	7.09952777075775	1.25183890143038e-12	2.90922831012185e-10
Contig33206	#N/A	0.426529383513595	21.0456833561283	2.96585521420037	7.09599148851319	1.28427381992161e-12	2.97970505637871e-10
Contig83036	ref|XP_011637194.1| PREDICTED: intraflagellar transport protein 88 homolog [Pogonomyrmex barbatus]	0.543171484201866	21.068813009655	2.95798230988354	7.12269743441588	1.05834987029416e-12	2.47996122094452e-10
Contig129824	#N/A	0.440289103518387	21.1154814423225	2.9606203541453	7.13211385335434	9.88390615490839e-13	2.32761047995015e-10
Contig147826	ref|XP_011066133.1| PREDICTED: probable elongator complex protein 3 [Acromyrmex echinatior]	0.5188412574177	21.148314037636	2.96465420314163	7.13348424083498	9.78595184266413e-13	2.30839004593141e-10
Contig93566	ref|XP_011630787.1| PREDICTED: thiamine transporter 2-like [Pogonomyrmex barbatus]	0.549364697987674	21.2328217257137	2.96047155885792	7.17210799143932	7.38516471431854e-13	1.77466261673311e-10
Contig97620	#N/A	1.83947533949208	21.2454226478853	2.96081194905554	7.17553934982677	7.20226777909015e-13	1.73958774424291e-10
Contig76116	ref|XP_003705410.2| PREDICTED: uncharacterized protein LOC100879013 [Megachile rotundata]	0.657993792948665	21.2577735473771	2.95957641235431	7.18270812628443	6.8343905579401e-13	1.65924206643516e-10
Contig134009	ref|XP_011163252.1| PREDICTED: ribosomal protein S6 kinase 2 beta-like, partial [Solenopsis invicta]	0.339776098090108	21.2804223194257	2.96623948648798	7.17420910090495	7.27263831047449e-13	1.75059961730002e-10
Contig79456	ref|XP_011066550.1| PREDICTED: uncharacterized protein PFB0765w-like [Acromyrmex echinatior]	0.690053580205243	21.3037378859425	2.9640823331914	7.18729626616173	6.60869078760119e-13	1.6099796245098e-10
Contig48098	#N/A	9.27964943851806	21.3537064979418	2.96473224572861	7.2025750482887	5.90859013097975e-13	1.44942024259904e-10
Contig83618	#N/A	10.974882279374	21.4160354043721	2.96384330873687	7.22576505351736	4.98288574597416e-13	1.23088602665893e-10
Contig58770	#N/A	1.11553253507351	21.4360236924592	2.95532399898224	7.25335824425388	4.06562860731637e-13	1.02058076283634e-10
Contig69554	ref|XP_012531093.1| PREDICTED: eukaryotic peptide chain release factor subunit 1 isoform X1 [Monomorium pharaonis]	0.611648419891967	21.4462114262828	2.96456723431413	7.2341794708004	4.68352084549642e-13	1.16303593129369e-10
Contig87661	#N/A	0.557317171763846	21.4570483854589	2.96425553041103	7.23859605399256	4.53353078278645e-13	1.12777165319609e-10
Contig42202	#N/A	6.62488132042272	21.4664957687388	2.96336615307594	7.24395658850891	4.35780956434292e-13	1.08981489913799e-10
Contig121189	ref|XP_012056871.1| PREDICTED: F-box/LRR-repeat protein 4-like [Atta cephalotes]	1.20704372645644	21.4668960318395	2.96353760557103	7.24367255926995	4.36695003745381e-13	1.09017127109914e-10
Contig47471	ref|XP_011068454.1| PREDICTED: xylosyltransferase oxt [Acromyrmex echinatior]	0.968930234088547	21.4795794986126	2.9561348609373	7.26610270135039	3.70007318319917e-13	9.38616230819556e-11
Contig145409	ref|XP_014787008.1| PREDICTED: ubiquitin-40S ribosomal protein S27a [Octopus bimaculoides]	0.685000107394247	21.4827838915525	2.96457681447711	7.2464925808784	4.27702595896435e-13	1.07150875341097e-10
Contig92820	ref|XP_012536579.1| PREDICTED: 30S ribosomal protein S12, chloroplastic-like [Monomorium pharaonis]	0.191450638407767	21.4896716162415	2.96761011660487	7.24140664435631	4.44054779335788e-13	1.10658920909716e-10
Contig121174	ref|XP_011687748.1| PREDICTED: O-glucosyltransferase rumi homolog isoform X1 [Wasmannia auropunctata]	1.13893708392003	21.5312447496304	2.96365794855453	7.2650910204168	3.72787166563454e-13	9.43973266557642e-11
Contig49419	#N/A	13.0224995048469	21.5945381437851	2.9645699772731	7.28420590822027	3.23570494663245e-13	8.26754795378526e-11
Contig40791	ref|XP_001946617.2| PREDICTED: alpha-tocopherol transfer protein [Acyrthosiphon pisum]	11.6020478097885	21.5959811642989	2.96607394888946	7.28099890172487	3.3135738126743e-13	8.42082803973814e-11
Contig144560	ref|XP_011163378.1| PREDICTED: phosphatidylserine decarboxylase proenzyme [Solenopsis invicta]	0.687970919886025	21.6093918773636	2.95721262511423	7.30735142067401	2.72459326508183e-13	7.02512508350853e-11
Contig84530	#N/A	0.843850705361239	21.6573247997555	2.96446517296622	7.30564318894842	2.75943543908966e-13	7.08908998612822e-11
Contig122974	ref|XP_011859742.1| PREDICTED: protein HIRA homolog isoform X1 [Vollenhovia emeryi]	5.79518984598464	21.6739757107061	2.96310138358178	7.3146250853242	2.58100985779201e-13	6.69154036470528e-11
Contig84729	ref|XP_011686746.1| PREDICTED: cell division cycle protein 123 homolog [Wasmannia auropunctata]	1.7231380622157	21.885133699488	2.9540517888153	7.4085138867064	1.27722541106737e-13	3.44404807075547e-11
Contig28053	#N/A	0.498784036268778	21.9432097871026	2.9608998994918	7.41099345873491	1.25356768142488e-13	3.39320599008222e-11
Contig53290	#N/A	0.686364046759818	21.9462650708007	2.96441923716749	7.40322583109752	1.32915423601737e-13	3.56367184224945e-11
Contig134129	ref|XP_011067144.1| PREDICTED: dnaJ homolog subfamily C member 13 [Acromyrmex echinatior]	5.05164606004113	21.9885068914174	2.96318651909084	7.42056119307799	1.16625108528723e-13	3.18123126636738e-11
Contig137927	#N/A	0.195336001608794	22.0194767245157	2.96733620501592	7.42062078685064	1.1657264094458e-13	3.18123126636738e-11
Contig138794	#N/A	0.195336001608794	22.0194767245157	2.96733620501592	7.42062078685064	1.1657264094458e-13	3.18123126636738e-11
Contig36687	#N/A	0.296374634685045	22.1272139773182	2.96584097985692	7.46068792211025	8.60718979457205e-14	2.39403562284183e-11
Contig41462	#N/A	0.79704677149929	22.1860248955742	2.9641428877089	7.48480276965415	7.16546619666137e-14	2.00884697855092e-11
Contig96041	ref|XP_011879133.1| PREDICTED: pre-mRNA-splicing factor CWC25 homolog [Vollenhovia emeryi]	1.9996769318764	22.2207282207274	2.95426242755997	7.52158237989722	5.41172110832272e-14	1.54165314000539e-11
Contig99521	ref|XP_012057279.1| PREDICTED: small integral membrane protein 13 [Atta cephalotes]	0.496584210975698	22.2280479782978	2.96479103617004	7.49734052320003	6.51256351178449e-14	1.83307905682194e-11
Contig71662	#N/A	0.354623065852779	22.2552139867604	2.96130529223554	7.51533928133414	5.67635309131221e-14	1.6073179614091e-11
Contig97737	#N/A	0.263522105349434	22.2941530399898	2.96597911220721	7.51662509969568	5.62082966648286e-14	1.59479190639564e-11
Contig120514	#N/A	0.416521095532183	22.3069759195986	2.96221025446159	7.53051741887682	5.05396481934781e-14	1.44849912186488e-11
Contig43980	#N/A	0.489454209793879	22.3303805026318	2.96095092398066	7.54162465908458	4.6415207763457e-14	1.33570867848334e-11
Contig107569	ref|XP_013772296.1| PREDICTED: 60S ribosomal protein L15-like [Limulus polyphemus]	1.2345606420804	22.3465404279463	2.96427156706255	7.53862793012944	4.74941916352596e-14	1.36398105599335e-11
Contig61947	ref|XP_011877725.1| PREDICTED: endothelin-converting enzyme 1-like [Vollenhovia emeryi]	1.60984766155224	22.3970470134254	2.9636725649245	7.5571934897592	4.11859079195175e-14	1.1974167142601e-11
Contig136837	ref|XP_011864607.1| PREDICTED: la-related protein 6 [Vollenhovia emeryi]	2.58540923017594	22.5272422843003	2.95499270896146	7.6234510548818	2.46981974482449e-14	7.472764892601e-12
Contig12754	#N/A	1.0731040043379	22.5336097094926	2.96149837704459	7.60885431650306	2.76536241074212e-14	8.22605079053955e-12
Contig131221	ref|XP_005112930.1| PREDICTED: 60S ribosomal protein L7a [Aplysia californica]	1.45014900817854	22.6044897509219	2.96404863982405	7.62622092202365	2.41735425351116e-14	7.32971896906365e-12
Contig46756	ref|XP_011883429.1| PREDICTED: ubiquitin carboxyl-terminal hydrolase 30 homolog [Vollenhovia emeryi]	4.03006082111856	22.6440799562883	2.96309742611938	7.64203017986623	2.13823039539357e-14	6.58225577729683e-12
Contig35078	#N/A	0.223708932601829	22.7403728360865	2.96756414446241	7.66297600627129	1.81673296556181e-14	5.61704415393844e-12
Contig44241	#N/A	0.373298342459168	22.8684045539569	2.96571287024966	7.71093007126876	1.2490409270196e-14	3.93063999699528e-12
Contig98900	#N/A	0.24725125831909	22.9255388190178	2.96618253077107	7.72897101954752	1.08419350217571e-14	3.45029930803876e-12
Contig135412	#N/A	0.25394164099205	23.0080680393504	2.96641953616148	7.75617466068964	8.75294561361689e-15	2.81723224685017e-12
Contig65127	ref|XP_011160390.1| PREDICTED: ATP-dependent Clp protease proteolytic subunit, mitochondrial [Solenopsis invicta]	3.05377281180929	23.0155245058742	2.95457247972734	7.78979857958947	6.71161002944906e-15	2.22091419749663e-12
Contig86530	ref|XP_011050423.1| PREDICTED: uncharacterized protein LOC105143670 [Acromyrmex echinatior]	2.00010720973957	23.0319022350307	2.96334246496128	7.77227151682978	7.70909790909531e-15	2.51564066342134e-12
Contig144340	ref|XP_011063962.1| PREDICTED: LOW QUALITY PROTEIN: uncharacterized protein LOC105151764 [Acromyrmex echinatior]	0.286447230881644	23.1405967950912	2.96528141853202	7.80384507536798	6.00489029261728e-15	1.99172061895761e-12
Contig90856	#N/A	0.406658068909805	23.2216428315956	2.9660342071234	7.82918914954695	4.91026437358963e-15	1.65586068065655e-12
Contig40282	#N/A	0.335207440077451	23.246600233704	2.96539692424777	7.83928790227667	4.5310859502697e-15	1.54644650124459e-12
Contig62402	#N/A	0.566527275313781	23.2702058629757	2.96521194016	7.84773781186111	4.2360863921637e-15	1.45278227901348e-12
Contig115102	#N/A	0.250652892457542	23.3602204179089	2.9661950912707	7.87548347263347	3.39427743773717e-15	1.18713173049492e-12
Contig90400	ref|XP_012217815.1| PREDICTED: uncharacterized protein LOC105669428 [Linepithema humile]	0.577590132584495	23.4176107471644	2.9650466171213	7.89788956839403	2.8366529467307e-15	9.9952755963643e-13
Contig148586	#N/A	0.298903593106405	23.441240297125	2.9654607254817	7.90475493258043	2.68461226670897e-15	9.50695888343804e-13
Contig37304	#N/A	0.260708829859586	23.5063884176677	2.96581406008757	7.92577954700695	2.26719498787563e-15	8.11007215700918e-13
Contig142426	#N/A	0.248550980588113	23.5652135472547	2.96721389565002	7.9418654589754	1.99162905710964e-15	7.19721766962712e-13
Contig133269	#N/A	0.25617184763663	23.6252199683625	2.96455961606024	7.96921736381178	1.59682383489276e-15	5.81511385048564e-13
Contig127047	ref|XP_011057796.1| PREDICTED: LOW QUALITY PROTEIN: S phase cyclin A-associated protein in the endoplasmic reticulum [Acromyrmex echinatior]	0.50637697886366	23.7732247636065	2.95850155216885	8.03556271457034	9.31503995073949e-16	3.5004978721267e-13
Contig143229	#N/A	0.286267958175825	23.7754665971136	2.96583142758085	8.01645918780577	1.08837066811945e-15	4.04693448140194e-13
Contig41216	#N/A	0.345170729210399	23.791394947184	2.96567957527596	8.02224055003318	1.03833548677069e-15	3.87107359562634e-13
Contig117369	ref|XP_011876854.1| PREDICTED: meiosis-specific with OB domain-containing protein isoform X2 [Vollenhovia emeryi]	0.177529353724414	23.8799309886857	2.96853921995749	8.04433737244936	8.67133290664205e-16	3.28480784372601e-13
Contig117645	ref|XP_011706357.1| PREDICTED: uncharacterized protein LOC105461553 isoform X2 [Wasmannia auropunctata]	24.0365282685683	23.8850040337995	2.96437817789141	8.05734039331956	7.7972300821072e-16	2.99381852965082e-13
Contig132469	#N/A	0.226777931467968	23.9657840748368	2.96695256906889	8.07757573366194	6.60669990158732e-16	2.57164428648646e-13
Contig130324	#N/A	0.179910642833339	23.9684807534586	2.96857762050513	8.07406233473529	6.79971348221495e-16	2.6395030656498e-13
Contig84836	#N/A	0.250953755822115	23.9820813643333	2.96720946840211	8.08236884511159	6.35206383247791e-16	2.47935790977246e-13
Contig87239	#N/A	0.310354778560856	24.077878379127	2.96551267183985	8.11929708065914	4.68891455356894e-16	1.85582509713062e-13
Contig77448	ref|XP_011638288.1| PREDICTED: chondroitin sulfate synthase 1-like [Pogonomyrmex barbatus]	0.304509830011521	24.144695686906	2.96545174089141	8.14199582275046	3.888146700253e-16	1.55193069012895e-13
Contig81328	#N/A	0.297624781026762	24.1602337311306	2.96599090254044	8.14575449656195	3.76924186556541e-16	1.50873248690877e-13
Contig112118	#N/A	1.6666519466207	24.1960626544976	2.33724294452643	10.352395206139	4.08144982635155e-25	7.03288556236579e-22
Contig59645	ref|XP_012530808.1| PREDICTED: zinc finger protein 431-like [Monomorium pharaonis]	17.2039996457916	24.402017641331	2.95430699398643	8.25981107955331	1.45903207599229e-16	6.01040394290038e-14
Contig131644	#N/A	0.343275752018124	24.446340454902	2.96400230428993	8.24774677790221	1.61408937027868e-16	6.59150247838923e-14
Contig137006	#N/A	0.454556349438802	24.5082168992269	2.95918869997284	8.28207302205901	1.21049324762002e-16	5.01580834043888e-14
Contig82883	#N/A	0.481309679190377	24.606071032456	2.96567920815947	8.29694289414624	1.0682469585621e-16	4.47893443631894e-14
Contig60688	#N/A	0.288633566649624	24.6850076466615	2.96691559797588	8.32009096028965	8.78958326295081e-17	3.72955479370919e-14
Contig60033	#N/A	0.348889749475612	24.7489720598011	2.96524157571273	8.34635945432284	7.03993280950055e-17	3.032687153e-14
Contig144689	#N/A	0.378671816414616	24.7562553057232	2.96217464110968	8.3574597399325	6.40831652405897e-17	2.8033309594426e-14
Contig28722	ref|XP_013295799.1| translation elongation factor EF-1, subunit alpha [Necator americanus]	0.544922370228749	24.7681546456186	2.96430108612839	8.35547872026985	6.51678820998916e-17	2.84198340650259e-14
Contig96911	ref|XP_011706332.1| PREDICTED: pilosulin-3a-like [Wasmannia auropunctata]	1.21800490240917	24.7988084086547	2.9648213107003	8.36435178037663	6.04463221059116e-17	2.65244843931646e-14
Contig46551	#N/A	0.360688048225537	24.8049334474622	2.96252640820871	8.37289867821313	5.62179400390306e-17	2.47458762420402e-14
Contig14286	ref|XP_015785005.1| PREDICTED: elongation factor 1-alpha [Tetranychus urticae]	6.00625051840908	24.850295889387	2.96522090283907	8.38058839582371	5.26637635886202e-17	2.32538493868165e-14
Contig62593	#N/A	0.366151656649491	24.9519458521352	2.96547725229072	8.41414171457925	3.95782011677139e-17	1.76970920582103e-14
Contig79229	#N/A	0.388998028192212	25.0148852496045	2.96333136050383	8.44147420805191	3.13360074527013e-17	1.41009039651093e-14
Contig72135	#N/A	0.338953367493394	25.0655404225271	2.96163916600241	8.46340118346028	2.5969045834063e-17	1.17231574096345e-14
Contig129466	ref|XP_011697244.1| PREDICTED: cGMP-dependent protein kinase, isozyme 2 forms cD4/T1/T3A/T3B isoform X3 [Wasmannia auropunctata]	0.425400338252086	25.1414979896366	2.96565192674462	8.47756196973333	2.29961882411129e-17	1.04815884190469e-14
Contig81768	#N/A	0.485031124113203	25.2670371768098	2.96647840336492	8.51751934150236	1.63007136370338e-17	7.65196656070418e-15
Contig113828	#N/A	0.229911682724331	25.2776778393893	2.96738604822393	8.51849992841976	1.61633138092757e-17	7.61275917103075e-15
Contig145568	ref|XP_011879409.1| PREDICTED: thyroid adenoma-associated protein homolog isoform X1 [Vollenhovia emeryi]	0.989771781664811	25.3070033251353	2.95839177981872	8.55431099348376	1.18574832831794e-17	5.62223763578323e-15
Contig133826	#N/A	0.247478521337708	25.3103740834243	2.96645550940361	8.53219406230462	1.43597908788246e-17	6.78593769834542e-15
Contig43090	#N/A	0.419107703273181	25.5537919944232	2.96459475346902	8.61965770010268	6.71545562799945e-18	3.26073448065099e-15
Contig56771	#N/A	0.464694647605251	25.6283123111948	2.96187741926198	8.65272551271912	5.02838635774712e-18	2.51948903259076e-15
Contig108138	#N/A	0.319357818194588	25.638720016402	2.96584584655148	8.64465698586907	5.39671708668712e-18	2.67557871648291e-15
Contig22269	#N/A	0.43101773144841	25.6806203891174	2.96168184298888	8.6709585129512	4.28497827576333e-18	2.1700880839804e-15
Contig76343	#N/A	0.333418735109601	25.7503977035159	2.96477197495527	8.68545639295058	3.77224736316025e-18	1.9311856364944e-15
Contig76706	#N/A	0.504958370243437	25.7959892566506	2.96259379891799	8.70723123300667	3.11387446174691e-18	1.64786936262717e-15
Contig113834	ref|XP_012216703.1| PREDICTED: C-1-tetrahydrofolate synthase, cytoplasmic [Linepithema humile]	0.344903359317462	25.8297749628381	2.9655291572282	8.71000539646708	3.03860329950245e-18	1.61408094139022e-15
Contig82326	ref|XP_012349661.1| PREDICTED: carbamoyl-phosphate synthase small chain-like [Apis florea]	0.675121581270753	25.9322928456046	2.96124403680245	8.75722923315913	2.00108432000047e-18	1.08748927370426e-15
Contig57906	ref|XP_011166588.1| PREDICTED: putative fatty acyl-CoA reductase CG5065 [Solenopsis invicta]	0.37225212832787	25.9566532116241	2.96536680759571	8.75326895314831	2.07259960129566e-18	1.12203871978649e-15
Contig104447	#N/A	0.321720493704803	26.0003561444948	2.96406134099432	8.77186844445425	1.75725641033612e-18	9.58668181510667e-16
Contig35001	ref|XP_012522537.1| PREDICTED: uncharacterized protein LOC105828627 [Monomorium pharaonis]	0.572110247175965	26.1284168220382	2.9623448602388	8.8201806524079	1.14275205771462e-18	6.3073217773009e-16
Contig137784	#N/A	0.37469164302666	26.2035524846402	2.96525673662496	8.83685792228058	9.84482106400142e-19	5.52001461063575e-16
Contig150061	#N/A	0.422550144325273	26.2125371803298	2.96486866952473	8.84104495074709	9.48274953378003e-19	5.33818350946023e-16
Contig131054	#N/A	0.342042607538608	26.2415438708228	2.96320044329991	8.85581126655051	8.30773455557896e-19	4.73329826411145e-16
Contig41542	ref|XP_011877585.1| PREDICTED: procollagen-lysine,2-oxoglutarate 5-dioxygenase 3 [Vollenhovia emeryi]	0.71366955347203	26.2817083980633	2.96293846532944	8.87014992231408	7.30474912986981e-19	4.26503775951742e-16
Contig99671	#N/A	0.479403568708306	26.3063434941946	2.96521600202063	8.87164492444	7.2073273566227e-19	4.22561715148846e-16
Contig72516	ref|XP_012540789.1| PREDICTED: WASH complex subunit strumpellin [Monomorium pharaonis]	0.342083968275415	26.3120902234321	2.96242135775596	8.88195399838851	6.56960052584391e-19	3.90027246008473e-16
Contig53289	ref|XP_012525293.1| PREDICTED: coiled-coil domain-containing protein 8 homolog [Monomorium pharaonis]	1.35782764056462	26.3265264279625	2.96398634105341	8.88213486793801	6.55892461761474e-19	3.90027246008473e-16
Contig124401	#N/A	0.360127750892797	26.3882758988847	2.96525725329389	8.89915229768744	5.62748313683333e-19	3.38360206291549e-16
Contig128369	#N/A	0.384832575223604	26.4379858790391	2.96491171652071	8.91695551396172	4.79282110608488e-19	2.90648602500633e-16
Contig92334	ref|XP_012542927.1| PREDICTED: branched-chain-amino-acid aminotransferase 5, chloroplastic-like, partial [Monomorium pharaonis]	0.573751064123249	26.4420688705711	2.96122952279495	8.92942227781582	4.2823925463192e-19	2.6308226939881e-16
Contig16338	ref|XP_011055914.1| PREDICTED: tryptophan 2,3-dioxygenase isoform X2 [Acromyrmex echinatior]	1.04494223084342	26.4843355760637	2.96423793566809	8.93461866113475	4.08584937992479e-19	2.53209763085629e-16
Contig103651	#N/A	0.283937886783641	26.5260906242091	2.96568213388651	8.94434717770878	3.74154689607008e-19	2.32893987565645e-16
Contig112319	ref|XP_011640611.1| PREDICTED: protein unc-45 homolog B isoform X1 [Pogonomyrmex barbatus]	0.31134370137656	26.5366059940973	2.9664211899374	8.94566357741576	3.69721648008565e-19	2.31152919020647e-16
Contig71057	#N/A	0.449625570546038	26.5493633431408	2.96512180573997	8.95388624229389	3.4318247077924e-19	2.15514015883086e-16
Contig112255	ref|XP_011176144.1| PREDICTED: lys-63-specific deubiquitinase BRCC36-like [Solenopsis invicta]	0.537832364167816	26.5716310396471	2.96437516104674	8.96365324767614	3.14095580296161e-19	1.9901687537716e-16
Contig147468	#N/A	0.466072866446977	26.5724985512276	2.96212393980445	8.97075851356235	2.94479436524537e-19	1.87428202444178e-16
Contig43605	#N/A	0.42323953151313	26.6279425499185	2.96491353826289	8.98101823418416	2.682723768847e-19	1.73905381716993e-16
Contig89045	ref|XP_011565640.1| PREDICTED: uncharacterized protein LOC105395382 [Plutella xylostella]	0.693584914795042	26.6747453706933	2.9612936509383	9.00780149318907	2.10228462853589e-19	1.38161167980575e-16
Contig60597	#N/A	0.532712542504837	26.6960234670559	2.9611627638889	9.01538537246631	1.9617949011256e-19	1.30138842321288e-16
Contig126248	#N/A	0.448489041644978	26.7524271392609	2.96387370467886	9.02616973760681	1.7778569579219e-19	1.18493327633722e-16
Contig69901	#N/A	0.338043829400606	26.9323888433301	2.96516939103488	9.08291746325169	1.05702769657361e-19	7.28560207037861e-17
Contig51341	#N/A	0.955049649292282	26.9443801546224	2.957399310288	9.11083601760848	8.17495635471508e-20	5.80450657312652e-17
Contig126373	#N/A	0.349327746099517	26.9504844589435	2.96524234362005	9.08879657574349	1.00141287253334e-19	6.97027756898244e-17
Contig38619	ref|XP_011169209.1| PREDICTED: kinesin-like protein Klp10A isoform X3 [Solenopsis invicta]	0.767495688712309	27.1531431862148	2.96423263753176	9.1602605147835	5.17721806267286e-20	3.77074938454375e-17
Contig38561	ref|XP_012248293.1| PREDICTED: ABC transporter H family member 2-like [Bombus impatiens]	0.596853208979223	27.2765795231107	2.96427961857834	9.20175659278476	3.5214527405037e-20	2.57808656930027e-17
Contig140183	ref|XP_008189586.1| PREDICTED: ATP-dependent DNA helicase PIF1-like [Acyrthosiphon pisum]	0.349674005711861	27.3752879170412	2.96515502208961	9.23232941047016	2.64809232415084e-20	1.97972222817747e-17
Contig68787	#N/A	0.927810245883983	27.7053372588607	2.96426653340685	9.34643931192613	9.06480475965447e-21	7.49023226973625e-18
Contig136577	ref|XP_012064383.1| PREDICTED: TATA box-binding protein-like protein 1 [Atta cephalotes]	1.15201572023021	27.7151302606477	2.95917224254628	9.36583881876362	7.54485778651366e-21	6.38362736922767e-18
Contig98545	#N/A	0.319506681056346	27.7430204585222	2.96682872979716	9.35106909943499	8.67662010614603e-21	7.21164935963598e-18
Contig30827	ref|XP_014483635.1| PREDICTED: nesprin-1 isoform X7 [Dinoponera quadriceps]	0.787022873761189	27.7989359983307	2.96412796210367	9.37845341150572	6.69474911983853e-21	5.69848172521581e-18
Contig76544	ref|XP_012214839.1| PREDICTED: putative golgin subfamily A member 6-like protein 6 [Linepithema humile]	0.237842137189374	28.0810505334326	2.96583430691669	9.46817914539059	2.84764145120931e-21	2.64712627718107e-18
Contig146849	ref|XP_011050387.1| PREDICTED: putative uncharacterized protein DDB_G0282133 [Acromyrmex echinatior]	1.05332980917191	28.1297058446715	2.95580985559207	9.51675081245608	1.78678355468243e-21	1.69441044245613e-18
Contig69192	ref|XP_011155716.1| PREDICTED: proteasome-associated protein ECM29 homolog [Solenopsis invicta]	2.18859985529692	28.1470894871171	2.96352149689973	9.49785230731849	2.14263622681002e-21	2.0183204729305e-18
Contig59801	ref|XP_017128962.1| PREDICTED: nicotinate-nucleotide--dimethylbenzimidazole phosphoribosyltransferase-like [Drosophila elegans]	0.582944748175171	28.2608660113582	2.96471399445862	9.53240888132243	1.53675186219701e-21	1.46715153968142e-18
Contig23044	ref|XP_011170570.1| PREDICTED: glucose dehydrogenase [FAD, quinone]-like [Solenopsis invicta]	0.279005625402668	28.6799568862256	2.96718167579599	9.66572324174648	4.21631100140337e-22	4.38053011445067e-19
Contig103244	ref|XP_012534025.1| PREDICTED: growth arrest-specific protein 8 [Monomorium pharaonis]	1.29432813901473	28.8484226200057	2.9635489953279	9.73441730353908	2.15046611279992e-22	2.37386258078351e-19
Contig68166	#N/A	0.316457972068062	29.001154609175	2.96552922147038	9.77941960551498	1.37999605561409e-22	1.58527888349678e-19
Contig141115	ref|XP_011696169.1| PREDICTED: leukotriene A-4 hydrolase [Wasmannia auropunctata]	1.74326665155437	29.2247998282592	2.95390847681268	9.89360369749617	4.43759555318891e-23	5.64881926917958e-20
Contig120165	#N/A	0.526878410882305	29.2931525524295	2.96212367244648	9.8892402180614	4.63532471260225e-23	5.79608385766867e-20
Contig134393	ref|XP_011173907.1| PREDICTED: uncharacterized protein LOC105206077, partial [Solenopsis invicta]	1.14506144158944	29.4803615897578	2.96126342801861	9.95533234592479	2.39022894434091e-23	3.24742479950517e-20
Contig59946	#N/A	1.32458639809248	29.560581436925	2.95642022918535	9.99877525701767	1.54293430267992e-23	2.20214129460368e-20
Contig113375	ref|XP_012137361.1| PREDICTED: uncharacterized protein LOC105662063 [Megachile rotundata]	0.257253657721437	29.6177230722809	2.96711443287655	9.98199555234788	1.82753709838086e-23	2.55668821178139e-20
Contig144925	ref|XP_011159727.1| PREDICTED: DNA polymerase zeta catalytic subunit [Solenopsis invicta]	0.218796496818318	29.7554305034339	2.96657356229451	10.0302351782638	1.12248923003441e-23	1.63509650243476e-20
Contig35529	ref|XP_012530064.1| PREDICTED: uncharacterized protein LOC105833136 [Monomorium pharaonis]	2.61122676988726	3.10498318707129	0.744591056667524	4.17005168040546	3.04530572448255e-05	0.00206573481974177
Contig99683	ref|XP_011706785.1| PREDICTED: transmembrane protein 245 isoform X2 [Wasmannia auropunctata]	18.9669021702435	3.21175535688725	0.970709091122624	3.30866928749257	0.000937404940774645	0.0433843779615575
Contig100255	ref|XP_011879719.1| PREDICTED: endoplasmic reticulum mannosyl-oligosaccharide 1,2-alpha-mannosidase [Vollenhovia emeryi]	17.2132854071646	3.73645290898055	1.12751238512259	3.31389079027661	0.000920074357705112	0.0427476549812806
Contig51590	ref|XP_012058670.1| PREDICTED: RCC1 and BTB domain-containing protein 1-like [Atta cephalotes]	18.4166606528259	3.76716395473357	1.00180510779884	3.76037607056203	0.000169658109470086	0.00966650260686311
Contig55157	ref|XP_014227590.1| PREDICTED: uncharacterized protein LOC106652924 [Trichogramma pretiosum]	83.0661343262342	3.87290576504804	1.18553471377441	3.26680081152393	0.00108770181926009	0.0492908928659374
Contig52759	#N/A	0.267372036688183	30.1000690465945	2.96572405866402	10.1493154626644	3.33695781085379e-24	5.18134206373856e-21
Contig34532	#N/A	0.455955350445075	30.3825268037199	2.96098896404773	10.2609388865085	1.05674230057972e-24	1.71625881431048e-21
Contig43093	#N/A	1.07436781553889	30.4630547672193	2.95811502141199	10.2981305820483	7.18438594010219e-25	1.19427315315132e-21
Contig136406	ref|XP_011874742.1| PREDICTED: uncharacterized protein LOC105565807, partial [Vollenhovia emeryi]	0.287241754085963	30.5554141560198	2.96565622278779	10.3030870271595	6.82357235071414e-25	1.14779797909388e-21
Contig33012	#N/A	0.4437455128566	30.5610305265371	2.96495236502784	10.3074271570127	6.52240655246128e-25	1.11035720318448e-21
Contig148986	#N/A	0.352441887143855	31.2500301275292	2.96537449567101	10.5383081203232	5.75244393839179e-26	1.04205521943967e-22
Contig69729	#N/A	0.742604883509237	31.7159507038766	2.96625465207229	10.6922548546933	1.10647683858567e-26	2.05712970870578e-23
Contig32846	#N/A	0.417543943638345	31.74006964567	2.96489260088347	10.7053016477603	9.61171110434464e-27	1.81080792521411e-23
Contig44602	ref|XP_012055168.1| PREDICTED: phosphatidate cytidylyltransferase, photoreceptor-specific [Atta cephalotes]	6.45295389260346	32.1710513321666	2.96312712436499	10.857128291133	1.84458875552643e-27	3.89007249835251e-24
Contig67071	ref|XP_011698950.1| PREDICTED: carboxypeptidase Q-like [Wasmannia auropunctata]	0.479197834934349	32.5222639525044	2.96460072631962	10.9702003591151	5.31544780499076e-28	1.17352629453403e-24
Contig53911	#N/A	0.341227560619451	33.1874098867186	2.96427272831582	11.1958017795395	4.27517058297824e-29	1.0597697857247e-25
Contig45773	#N/A	0.377079237956245	33.2462855327472	2.96497274882967	11.2130155482441	3.51993006044609e-29	8.88134924555091e-26
Contig46655	#N/A	0.269282546257952	33.4850724451271	2.96570642799503	11.2907576181655	1.45774681263825e-29	3.88632549783672e-26
Contig45348	#N/A	0.324049264242673	33.5313763499312	2.96547077713738	11.3072691892447	1.20790592206677e-29	3.28218236673593e-26
Contig75161	ref|XP_011066082.1| PREDICTED: homeobox protein Hox-B4 [Acromyrmex echinatior]	0.332808008079776	33.8679671940421	2.96627532930537	11.417674839366	3.41241565208773e-30	1.02588105190008e-26
Contig103257	ref|XP_012534025.1| PREDICTED: growth arrest-specific protein 8 [Monomorium pharaonis]	0.753909242306507	34.0704000646385	2.96392729037592	11.4950188472125	1.39750514872926e-30	4.48780193181813e-27
Contig53474	ref|XP_011696169.1| PREDICTED: leukotriene A-4 hydrolase [Wasmannia auropunctata]	0.572684410017042	34.3461056471007	2.95896844931486	11.6074592329815	3.77671477472604e-31	1.4422661284445e-27
Contig60023	ref|XP_012148636.1| PREDICTED: uncharacterized protein LOC105663570, partial [Megachile rotundata]	0.691036213362984	34.4261662653483	2.96408441117655	11.6144351812448	3.48080973492624e-31	1.36618881421076e-27
Contig119262	ref|XP_011883028.1| PREDICTED: centrosomal protein of 135 kDa [Vollenhovia emeryi]	0.901171244840808	35.1640186522069	2.963973065817	11.863811806439	1.82474596625289e-32	1.11310329967743e-28
Contig146663	ref|XP_006570971.1| PREDICTED: LOW QUALITY PROTEIN: probable tRNA(His) guanylyltransferase [Apis mellifera]	0.789269325531468	35.4105753428489	2.9568403925697	11.9758156144758	4.75735901015375e-33	4.21931072237887e-29
Contig43114	#N/A	0.518878699518128	36.167624025006	2.95847604466403	12.2250859831158	2.28339966286171e-34	4.03296902704215e-30
Contig40276	#N/A	0.441385708583708	36.3044323780188	2.96174596914802	12.2577806321661	1.52622862035418e-34	3.08073607671692e-30
Contig17949	ref|XP_015523501.1| PREDICTED: uncharacterized protein LOC107227008 [Neodiprion lecontei]	2.86015054944807	37.8681007625981	2.96354552901158	12.7779716531732	2.17672414788668e-37	1.02521530641315e-32
Contig97810	ref|XP_011162612.1| PREDICTED: small VCP/p97-interacting protein [Solenopsis invicta]	1.05039004316895	37.9134893439534	2.95721204488532	12.8206867713551	1.25583219721039e-37	8.87226609846185e-33
Contig118739	#N/A	0.402888309946224	38.9934814257195	2.96326722433321	13.1589487122592	1.51174657149722e-39	2.13605255312843e-34
Contig79825	ref|XP_011059978.1| PREDICTED: FYVE, RhoGEF and PH domain-containing protein 2-like isoform X1 [Acromyrmex echinatior]	9.09486417220126	4.03759623623219	1.13076875955895	3.57066482611975	0.000356076302051486	0.0187302016905493
Contig49841	ref|XP_011870235.1| PREDICTED: RNA exonuclease 1 homolog [Vollenhovia emeryi]	19.8729605724292	4.17169166028832	0.954856314207247	4.36892085041276	1.24862006587669e-05	0.000918841702798725
Contig55289	ref|XP_011878771.1| PREDICTED: leishmanolysin-like peptidase [Vollenhovia emeryi]	27.9986537170086	4.17469199867222	1.25364890261167	3.33003282655557	0.000868357460179919	0.0405741746200536
Contig16258	ref|XP_011866871.1| PREDICTED: tyrosine-protein phosphatase corkscrew [Vollenhovia emeryi]	12.6957125513657	4.18383592414725	1.19256842276696	3.50825650275063	0.000451053930113446	0.0230915098417535
Contig72350	ref|XP_011164622.1| PREDICTED: zinc finger protein 2-like isoform X4 [Solenopsis invicta]	4.41960381620963	4.18964633988838	1.07700571221898	3.89008738983971	0.000100208128124642	0.00604831605280973
Contig49431	ref|XP_011634895.1| PREDICTED: striatin-interacting protein 1 [Pogonomyrmex barbatus]	10.534123886454	4.33558364550435	1.23563594252991	3.50878725381478	0.000450154830098628	0.0230538336456854
Contig38830	ref|XP_011638051.1| PREDICTED: protein suppressor of forked [Pogonomyrmex barbatus]	12.2099846472474	4.65346063740008	1.39628869725156	3.33273530506973	0.000859967158957054	0.0402493009182724
Contig24334	ref|XP_015793825.1| PREDICTED: uncharacterized protein LOC107370342 [Tetranychus urticae]	89.918589309902	5.23951102420762	1.27220319038835	4.11845455489561	3.81421768040459e-05	0.0025385657823275
Contig138131	ref|XP_011870620.1| PREDICTED: lipase 3-like [Vollenhovia emeryi]	70.869450130096	5.38939909904617	1.55179382889434	3.4730123285038	0.000514651714059349	0.0259246856475736
Contig81145	#N/A	2.3588360721122	6.28056712610918	1.563294113137	4.01752112627497	5.88135640115659e-05	0.00375516500413115
Contig45596	ref|XP_012527438.1| PREDICTED: uncharacterized protein LOC105831678 [Monomorium pharaonis]	14.3005309123205	7.08611003779882	1.91706827724622	3.69632637601082	0.000218741732998801	0.0121206080970712
Contig6247	ref|XP_011863092.1| PREDICTED: spectrin alpha chain isoform X3 [Vollenhovia emeryi]	29.4597483423873	7.2217367589358	1.77667792405602	4.06474165134508	4.8085695416453e-05	0.00314117637783567
Contig37965	#N/A	1.0639522702213	7.24680168811526	2.18732834513156	3.31308360916404	0.00092273391127271	0.0428359383586899
Contig136997	ref|XP_012055692.1| PREDICTED: potassium voltage-gated channel protein eag isoform X1 [Atta cephalotes]	1.95894680430088	7.50854160563073	1.88823071547653	3.97649585089808	6.99382185860332e-05	0.00439007573147523
Contig70789	ref|XP_011053398.1| PREDICTED: TBC1 domain family member 25 isoform X2 [Acromyrmex echinatior]	4.48366415425822	7.52668259600448	2.20677101568304	3.41072206518664	0.000647910997052588	0.0317213721935341
Contig126185	ref|XP_011172550.1| PREDICTED: uncharacterized protein LOC105204964 [Solenopsis invicta]	5.93593568518017	7.53109351970706	1.9227187188418	3.91689821600303	8.96955965579409e-05	0.00547460851267705
Contig108429	#N/A	2.06554962197817	7.56836236539805	2.24105660058003	3.37714021298668	0.00073243703568137	0.0352730592469906
Contig119572	ref|XP_011882864.1| PREDICTED: peroxisomal hydratase-dehydrogenase-epimerase-like [Vollenhovia emeryi]	2.00958091701597	7.57570127262734	2.29480832731872	3.30123487109656	0.000962602641190876	0.0444051143951509
Contig146041	#N/A	4.18366286121112	7.61670654016538	1.74116793317635	4.37448128640325	1.21721563951253e-05	0.000899053414616846
Contig116309	ref|XP_011867770.1| PREDICTED: general transcription factor IIH subunit 2 [Vollenhovia emeryi]	2.79683548395511	7.98412826271356	2.22283731349858	3.59186352245777	0.000328321788465687	0.0173748628257814
Contig37651	ref|XP_012151618.1| PREDICTED: putative adenosylhomocysteinase 3 isoform X6 [Megachile rotundata]	1.8202058904687	8.08991786352041	1.85974309465997	4.35001903582793	1.36125714498296e-05	0.000989920487980737
Contig70777	ref|XP_011053398.1| PREDICTED: TBC1 domain family member 25 isoform X2 [Acromyrmex echinatior]	13.6729093705148	8.21889856692888	2.4344703688863	3.37605200374189	0.000735340188283108	0.0353526242204281
Contig21715	#N/A	1219.29224168965	8.31260781349381	1.83441294117362	4.5314812313609	5.85715417325277e-06	0.000464421051188606
Contig43498	ref|XP_011861941.1| PREDICTED: thioredoxin domain-containing protein 11 isoform X1 [Vollenhovia emeryi]	4.20512099106066	8.51376519429608	2.47308968111529	3.44256225696458	0.000576231213502459	0.0286185384092292
Contig93426	#N/A	3.54331431827692	8.61645981652491	2.13703849588675	4.03196284629846	5.53129331011623e-05	0.00355252341290679
Contig8683	ref|YP_009114111.1| cytochrome c oxidase subunit I (mitochondrion) [Euphaea yayeyamana]	2.23819311285054	8.71430364369123	2.6596211549859	3.27652065308431	0.00105094626065564	0.0478246550054298
Contig100593	ref|XP_011704439.1| PREDICTED: isoaspartyl peptidase/L-asparaginase isoform X2 [Wasmannia auropunctata]	1.5202223542404	8.73357095919364	2.51052756979408	3.47877914756777	0.000503703522031424	0.0254184987687408
Contig77917	ref|XP_011875304.1| PREDICTED: fatty acid synthase-like [Vollenhovia emeryi]	2.29163456653676	8.7663926265508	2.26196384249989	3.8755670899064	0.000106376664296751	0.00638246434613079
Contig70770	#N/A	2.9379092020961	8.78429481159267	2.65167591066324	3.31273319498367	0.000923890694977012	0.0428712589583471
Contig21713	#N/A	13611.5059573645	9.1354401730139	1.84747070995444	4.9448362692793	7.62078879120994e-07	6.73417507086674e-05
Contig53220	#N/A	0.637909537163141	9.17474438516872	2.7085247818028	3.38735847898058	0.0007056911427339	0.0341245863774373
Contig21714	#N/A	1284.31470220267	9.23313573891873	1.99577334144033	4.62634485950957	3.72175410687861e-06	0.000307348153149986
Contig9722	ref|XP_011698234.1| PREDICTED: organic cation transporter 1-like [Wasmannia auropunctata]	2.86187020742605	9.38308265686507	1.82496826049717	5.14150457296658	2.72547018150711e-07	2.4990315394965e-05
Contig35645	#N/A	0.544419067168127	9.41659675535858	2.77839843848021	3.38921755243625	0.0007009237678319	0.0339871055673796
Contig98405	ref|XP_011703661.1| PREDICTED: folliculin isoform X1 [Wasmannia auropunctata]	2.65327681409926	9.4217474545273	2.37831228854598	3.96152662537326	7.44720756289494e-05	0.00463598793965162
Contig35610	ref|XP_011860076.1| PREDICTED: aminopeptidase N-like [Vollenhovia emeryi]	1.81797137727561	9.51379224578547	2.80745268064609	3.38876317003356	0.000702086206436076	0.0340084589341098
Contig1141	#N/A	9.14542676987635	9.54754037846156	2.83118437026814	3.37227786318886	0.000745491960363713	0.0357427789139683
Contig44000	ref|XP_012349676.1| PREDICTED: LOW QUALITY PROTEIN: putative leucine--tRNA ligase, mitochondrial, partial [Apis florea]	1.16372953988623	9.61058938566898	2.13980386993996	4.4913412489242	7.07760452735911e-06	0.000551228983718297
Contig29733	ref|XP_011168815.1| PREDICTED: uncharacterized protein LOC105202124 [Solenopsis invicta]	1.20764120601879	9.62432621364712	1.83527047820339	5.24409144480366	1.5705429733035e-07	1.47548544214671e-05
Contig7688	ref|XP_011636058.1| PREDICTED: ras-related protein Rab-23 [Pogonomyrmex barbatus]	1.6870712989891	9.63404191646402	2.28226576019448	4.22126208283608	2.42938279245e-05	0.0016801982399648
Contig91781	#N/A	1.6214881694324	9.64606830650486	2.94191141169356	3.27884390677554	0.00104233273076818	0.0475705710140023
Contig119254	#N/A	0.83914399421948	9.65009448298489	2.957068509663	3.26339902219061	0.00110084405858124	0.0497533395949657
Contig71908	ref|XP_011054675.1| PREDICTED: inositol-phosphate phosphatase-like [Acromyrmex echinatior]	1.039825079823	9.65202126832352	2.95569457259769	3.26556788303082	0.00109244817291549	0.0494620320094855
Contig35221	ref|XP_011873858.1| PREDICTED: rotatin isoform X2 [Vollenhovia emeryi]	7.03192474943585	9.6523943375686	2.95582766820564	3.26554705519357	0.0010925285172481	0.0494620320094855
Contig143075	ref|XP_011866572.1| PREDICTED: coiled-coil domain-containing protein 103-like [Vollenhovia emeryi]	0.647335796124014	9.66282047806769	2.95967798981146	3.26482154860476	0.00109533060495955	0.0495571336820267
Contig48181	#N/A	0.267414531381893	9.67196608390173	2.96503907746782	3.26200290492013	0.00110628009897111	0.0499725253018928
Contig92724	#N/A	0.342710873933329	9.68571959272216	2.96248839855583	3.2694540162398	0.00107755250030516	0.0488936851752145
Contig6658	#N/A	0.644968293274841	9.69446593791551	2.95373544380157	3.28210366918927	0.00103035716455714	0.0470544202587041
Contig92133	ref|XP_009048959.1| hypothetical protein LOTGIDRAFT_140877, partial [Lottia gigantea]	1.6508722740632	9.70720308401223	2.33916580885075	4.14985677684023	3.32683370734284e-05	0.00224163863779886
Contig53765	#N/A	0.517870708737042	9.7096356294318	2.96151869443206	3.27860014785213	0.00104323339686968	0.0475963026404569
Contig120616	#N/A	0.440441434735347	9.71117198618399	2.96372840173987	3.27667406381874	0.00105037546134699	0.0478140791114516
Contig29771	#N/A	0.362394557356839	9.71205993324979	2.96366623320894	3.27704240930462	0.00104900611970748	0.0477978888561353
Contig124418	#N/A	8.96706216222206	9.73044786257038	2.97132124836423	3.27478823366109	0.00105741206919782	0.0480569807466854
Contig98253	ref|XP_011867093.1| PREDICTED: peroxisomal biogenesis factor 3 isoform X1 [Vollenhovia emeryi]	0.703839756780397	9.7317421973382	2.63643194937328	3.691254841473	0.000223150417686216	0.0123262253978926
Contig84452	ref|XP_011172799.1| PREDICTED: SUN domain-containing ossification factor isoform X1 [Solenopsis invicta]	0.726035393803742	9.7338966784352	2.95819368201503	3.29048660255564	0.0010001426429337	0.0458673012069467
Contig116548	ref|XP_011066524.1| PREDICTED: uncharacterized protein LOC105153409 [Acromyrmex echinatior]	0.755803438966108	9.7394841106958	2.95671470950161	3.29402227391005	0.000987646717750231	0.0453531096125949
Contig115259	#N/A	0.288888474657897	9.74351288778964	2.96431766858943	3.28693277074656	0.00101285011019943	0.0463447804471662
Contig18100	ref|XP_011057028.1| PREDICTED: hormone receptor 4 isoform X1 [Acromyrmex echinatior]	0.389654133182202	9.74532830053468	2.96329360948506	3.28868130695566	0.00100657929351032	0.046117585744205
Contig136633	#N/A	0.214034305179298	9.7566642583539	2.96528822215216	3.29029204833002	0.00100083447545463	0.0458841365601273
Contig141989	ref|XP_011175427.1| PREDICTED: heparan sulfate glucosamine 3-O-sulfotransferase 5 [Solenopsis invicta]	0.271352431232374	9.76757794153672	2.96318211682223	3.2963137453096	0.000979625468944821	0.0450433257030577
Contig7032	#N/A	0.514299428242276	9.76970552203659	2.96009781962557	3.30046711877662	0.000965240235950715	0.0444835367655085
Contig128367	ref|XP_011159224.1| PREDICTED: uncharacterized protein LOC105195497 [Solenopsis invicta]	0.216512686188824	9.7720720488802	2.96395795192112	3.29696716599719	0.000977349261091417	0.0449532937970163
Contig145918	#N/A	0.657912209149563	9.77232658510628	2.66346460405776	3.66902814109797	0.000243474280296895	0.0133445249740537
Contig125631	#N/A	0.273514758739957	9.77499638115062	2.96407470234792	3.297823895399	0.00097437224220959	0.0448402265939161
Contig127550	ref|XP_011640611.1| PREDICTED: protein unc-45 homolog B isoform X1 [Pogonomyrmex barbatus]	0.383080624133832	9.77678304410121	2.96205693767113	3.30067356901925	0.000964530323911475	0.0444795173556526
Contig82147	#N/A	0.643584111602925	9.77853456524526	2.96385661629505	3.29926033246131	0.000969399653744999	0.0446457832057389
Contig56950	#N/A	0.632175922750604	9.78473316435111	2.95897159180842	3.30680199547675	0.00094367569786285	0.0436174501409641
Contig91555	ref|XP_011636880.1| PREDICTED: uncharacterized protein LOC105427043 [Pogonomyrmex barbatus]	0.299189941634973	9.7856620574902	2.96137598907484	3.30443080972886	0.000951694639895054	0.0439449665141344
Contig48017	#N/A	0.404324860835574	9.79366720370104	2.96114660248347	3.30739018307545	0.000941696260862222	0.0435544538694106
Contig149694	ref|XP_011875837.1| PREDICTED: exocyst complex component 1 [Vollenhovia emeryi]	1.37631849438167	9.79736429144365	2.94830179249849	3.32305339852643	0.000890378685733864	0.0414796693564582
Contig38861	#N/A	0.741333631227033	9.79902358043375	2.9622295349898	3.30798929140631	0.000939684026894291	0.0434756168788745
Contig98083	#N/A	0.521377727022017	9.80328762946771	2.96049031602745	3.31137297642719	0.000928393777934123	0.0430506041077467
Contig137766	ref|XP_968724.1| PREDICTED: pathogenesis-related protein 5 [Tribolium castaneum]	0.289824839082448	9.80877730174644	2.96427252456017	3.30899983738905	0.000936298914972067	0.0433473878731351
Contig37364	#N/A	1.21243976951197	9.81264578278602	2.95052760303641	3.32572580330641	0.000881886363049211	0.0411518815851269
Contig84511	#N/A	0.250751104270126	9.81662763600984	2.96459329570767	3.31128983197223	0.000928669690937614	0.0430506041077467
Contig61263	#N/A	0.354820702241148	9.82477994256955	2.96359104541672	3.31516049009659	0.00091590523764115	0.0425846207183223
Contig56089	ref|XP_012221308.1| PREDICTED: putative nuclease HARBI1 [Linepithema humile]	0.869967577267392	9.82873665141218	2.9688364144574	3.31063597965485	0.000930842134619258	0.0431088826926572
Contig108493	#N/A	0.341327052256683	9.84353219705046	2.96343953583999	3.32165784994169	0.000894843505656528	0.0416464765542656
Contig112280	ref|XP_012061701.1| PREDICTED: uncharacterized protein LOC105624968 [Atta cephalotes]	2.12224464695624	9.86512681393386	2.93209651340539	3.3645300449119	0.000766741356887873	0.0365884003729098
Contig97670	#N/A	0.409224338213294	9.87027011310664	2.96415258802088	3.32987922180378	0.000868836624281677	0.040583143306158
Contig46832	#N/A	0.51612877338508	9.87304237117931	2.95888407644357	3.33674524452685	0.000847656068738365	0.0397119560824021
Contig54362	#N/A	0.891693711640349	9.87455318243262	2.96290130975918	3.3327310463929	0.000859980321395813	0.0402493009182724
Contig93125	ref|XP_017032415.1| PREDICTED: protein jag-like [Drosophila kikkawai]	0.701877323475117	9.87995723722553	2.95869610555779	3.33929436641581	0.000839915094857187	0.0394368436483893
Contig139032	ref|YP_009115386.1| cytochrome c oxidase subunit III (mitochondrion) [Myrmica scabrinodis]	12.0789193509384	9.88074670085847	2.97131949384629	3.32537336402964	0.000883002024017151	0.0411903390516842
Contig762	#N/A	0.555123318053859	9.88192676084134	2.95701073193969	3.34186367810683	0.000832179203940525	0.0391426181688364
Contig5083	#N/A	0.561387102775621	9.88641445737954	2.9583007797479	3.34192335176345	0.000832000321567549	0.0391426181688364
Contig130103	#N/A	0.289053688555411	9.89222482500552	2.96242673222412	3.3392302052239	0.000840109127452471	0.0394368436483893
Contig76881	ref|XP_017063185.1| PREDICTED: uncharacterized protein HI_1663-like [Drosophila eugracilis]	0.682217215980753	9.89954053657369	2.96215033488201	3.34201151778071	0.000831736093569589	0.0391426181688364
Contig25165	ref|XP_011879656.1| PREDICTED: uncharacterized protein LOC105568530 [Vollenhovia emeryi]	0.986512135288163	9.90003940610025	2.94876378164968	3.35735248367766	0.000786927221753901	0.0374378638559465
Contig137617	ref|XP_011696486.1| PREDICTED: solute carrier family 41 member 1-like [Wasmannia auropunctata]	2.12553630324704	9.91811282780174	2.95344826819165	3.35814679221534	0.000784669311827266	0.0373555996473239
Contig34057	#N/A	0.465884060841923	9.92175439969925	2.96177632085795	3.34993373058812	0.000808308963655326	0.0382618531449269
Contig71731	#N/A	1.2289064946642	9.92194048530752	2.95650419992557	3.35597036715095	0.000790870422715779	0.0375748547809251
Contig37548	#N/A	0.371989644944062	9.92380222440495	2.96153686290646	3.35089606639767	0.000805505284580425	0.0381547033842978
Contig148964	ref|XP_011868733.1| PREDICTED: gamma-aminobutyric acid type B receptor subunit 1 isoform X2 [Vollenhovia emeryi]	1.03432945420861	9.9311727262878	2.95404202134082	3.3618928419238	0.000774101579578121	0.0368897911938111
Contig53943	#N/A	0.337488530347649	9.93935561477713	2.96375963818578	3.35363080282089	0.000797587059232294	0.0378303654610089
Contig61893	ref|XP_011644058.1| PREDICTED: uncharacterized protein LOC105431518 [Pogonomyrmex barbatus]	0.305844027462766	9.94182387472075	2.96428275708189	3.35387164094552	0.000796893202606748	0.0378228481184836
Contig71797	ref|XP_005095160.2| PREDICTED: long-chain-fatty-acid--CoA ligase 5-like [Aplysia californica]	1.28315656347014	9.94575630549977	2.96111559691541	3.35878690985933	0.000782854083960449	0.0372817436809436
Contig128917	ref|XP_011172985.1| PREDICTED: insulin-degrading enzyme-like [Solenopsis invicta]	0.332341423523655	9.95037898781661	2.96457679823302	3.35642476651216	0.000789571994921601	0.0375384098810355
Contig100798	#N/A	0.208017017663611	9.95106963145889	2.9660058393861	3.35504047204389	0.00079353374014129	0.0376760540593897
Contig33343	#N/A	27.4104640811254	9.95346941606351	2.96922779563167	3.35220808275709	0.000801697379594274	0.0379870672852221
Contig147642	#N/A	0.57745512467226	9.9574895653591	2.95831952616707	3.3659276752503	0.000762867075050214	0.0364404425636816
Contig82	#N/A	5.3266146862014	9.96041174725468	2.94323481338448	3.38417162706805	0.000713933607532347	0.0344759661461032
Contig104520	ref|XP_011686585.1| PREDICTED: longitudinals lacking protein, isoforms H/M/V isoform X20 [Wasmannia auropunctata]	0.934251425038211	9.96295349895584	2.95812345869448	3.36799786691555	0.000757161819273493	0.0362291546149295
Contig88838	ref|XP_011868745.1| PREDICTED: uncharacterized protein LOC105562482 [Vollenhovia emeryi]	0.327084645201822	9.96860045424757	2.96122806698993	3.36637375735149	0.000761634350958738	0.0363938616460659
Contig74029	ref|XP_012542435.1| PREDICTED: tyrosine-protein phosphatase Lar isoform X10 [Monomorium pharaonis]	0.829673197127675	9.97441180047467	2.95542016178087	3.37495559158137	0.000738276031413574	0.0354575759383561
Contig133337	#N/A	0.307123298850754	9.97490225129735	2.96272896088651	3.36679540483941	0.000760470851217513	0.0363505581408934
Contig42513	#N/A	0.293293070705532	9.97620900758209	2.96277148364068	3.36718814213887	0.000759388611342773	0.0363132808689309
Contig11610	ref|XP_011858947.1| PREDICTED: uncharacterized protein LOC105556465 [Vollenhovia emeryi]	0.259880250644774	9.97930003962456	2.96266405258579	3.368353570468	0.000756185531091759	0.0361946974887101
Contig38756	ref|XP_011863377.1| PREDICTED: espin [Vollenhovia emeryi]	1.21059466179396	9.98150369812716	2.95579474816437	3.37692720522152	0.000733004463886744	0.0352763391463914
Contig72538	ref|XP_012057853.1| PREDICTED: cytoplasmic dynein 1 light intermediate chain 2 [Atta cephalotes]	2.43193126264292	9.99060543963302	2.71298850092508	3.68250931997183	0.000230949421897828	0.0127073444181844
Contig100564	#N/A	0.294486792782636	9.99129991201889	2.96453553999401	3.37027496456969	0.000750932121986264	0.0359676122170485
Contig34002	ref|XP_013783884.1| PREDICTED: superoxide dismutase [Cu-Zn] 2-like [Limulus polyphemus]	1.04960989649352	9.99779815820057	2.60721605007904	3.83466424192099	0.000125735932207853	0.00738715593063325
Contig80584	ref|XP_011172617.1| PREDICTED: nuclear pore complex protein Nup205 [Solenopsis invicta]	0.672449286238063	9.99821318800836	2.95735895854203	3.38079121546254	0.000722774396248657	0.0348671402754341

## Sheet: b)
Contig	Annotation	baseMean	log2FoldChange	lfcSE	stat	pvalue	padj
Contig111997	ref|XP_011874806.1| PREDICTED: uncharacterized protein LOC105565871 [Vollenhovia emeryi]	3.14911	-36.9515	2.95731	-12.495	7.95443e-36	2.80984e-31
Contig32208	ref|XP_011644516.1| PREDICTED: splicing factor 1 [Pogonomyrmex barbatus]	2.42867	-36.3775	2.9546	-12.3122	7.79161e-35	2.20186e-30
Contig77478	ref|XP_012234412.1| PREDICTED: cysteine-rich hydrophobic domain-containing protein 2 [Linepithema humile]	1.43107	-36.3764	2.96336	-12.2754	1.2276e-34	2.89094e-30
Contig61936	ref|XP_011170893.1| PREDICTED: SCAN domain-containing protein 3-like [Solenopsis invicta]	0.700878	-36.0411	2.96397	-12.1597	5.09317e-34	7.99611e-30
Contig41383	ref|XP_011871770.1| PREDICTED: Hermansky-Pudlak syndrome 1 protein homolog isoform X1 [Vollenhovia emeryi]	0.815015	-35.6704	2.9639	-12.0349	2.32781e-33	2.99012e-29
Contig83545	ref|XP_012522205.1| PREDICTED: 40S ribosomal protein S9 [Monomorium pharaonis]	0.857464	-35.6078	2.96416	-12.0128	3.04442e-33	3.58472e-29
Contig60205	ref|XP_015512049.1| PREDICTED: uncharacterized protein LOC107218636 [Neodiprion lecontei]	0.903943	-35.5428	2.95328	-12.035	2.32538e-33	2.99012e-29
Contig71584	ref|XP_011687046.1| PREDICTED: zinc finger protein 808-like [Wasmannia auropunctata]	0.356332	-35.5416	2.96494	-11.9873	4.14319e-33	4.18157e-29
Contig49657	#N/A	0.317028	-35.5148	2.96688	-11.9704	5.07642e-33	4.21931e-29
Contig41529	#N/A	0.570515	-35.492	2.95991	-11.9909	3.96448e-33	4.18157e-29
Contig25133	ref|XP_015523959.1| PREDICTED: uncharacterized protein LOC107227357 [Neodiprion lecontei]	0.572625	-35.4406	2.96054	-11.971	5.04281e-33	4.21931e-29
Contig37902	ref|XP_011871053.1| PREDICTED: nitrate reductase [NADH] isoform X1 [Vollenhovia emeryi]	0.505877	-35.3649	2.96182	-11.9403	7.29932e-33	5.72985e-29
Contig82032	#N/A	0.335232	-35.2941	2.96537	-11.9021	1.15404e-32	8.15309e-29
Contig127542	ref|XP_011866150.1| PREDICTED: putative serine protease K12H4.7 [Vollenhovia emeryi]	0.424151	-35.2869	2.96469	-11.9024	1.14999e-32	8.15309e-29
Contig98347	ref|XP_011156487.1| PREDICTED: mitotic spindle assembly checkpoint protein MAD2B [Solenopsis invicta]	0.78658	-35.1879	2.95748	-11.8979	1.21297e-32	8.16141e-29
Contig19402	ref|XP_012224753.1| PREDICTED: LOW QUALITY PROTEIN: transcription factor IIIB 90 kDa subunit [Linepithema humile]	0.572393	-35.1344	2.96404	-11.8536	2.06184e-32	1.16533e-28
Contig65019	ref|XP_011878696.1| PREDICTED: protein unc-13 homolog D isoform X8 [Vollenhovia emeryi]	0.381887	-35.1135	2.96046	-11.8608	1.89066e-32	1.1131e-28
Contig19429	#N/A	2.02371	-35.1132	2.95599	-11.8787	1.52785e-32	9.81274e-29
Contig126924	ref|XP_011695227.1| PREDICTED: bifunctional heparan sulfate N-deacetylase/N-sulfotransferase [Wasmannia auropunctata]	2.81748	-35.104	2.96339	-11.8459	2.26013e-32	1.22827e-28
Contig93024	ref|XP_011862134.1| PREDICTED: xaa-Pro aminopeptidase 1-like [Vollenhovia emeryi]	0.269618	-35.0158	2.96394	-11.814	3.30622e-32	1.67934e-28
Contig51009	#N/A	0.370832	-35.0117	2.96477	-11.8093	3.49611e-32	1.70341e-28
Contig135540	ref|XP_011168205.1| PREDICTED: villin-1 [Solenopsis invicta]	0.472816	-34.9681	2.96003	-11.8134	3.32785e-32	1.67934e-28
Contig45634	ref|XP_011873845.1| PREDICTED: transcription factor SPT20 homolog isoform X2 [Vollenhovia emeryi]	2.03871	-34.7975	2.95788	-11.7644	5.95693e-32	2.80565e-28
Contig55745	ref|XP_011880143.1| PREDICTED: stress response protein NST1-like isoform X9 [Vollenhovia emeryi]	0.700949	-34.7492	2.9592	-11.7428	7.69071e-32	3.5054e-28
Contig20898	#N/A	0.720929	-34.7391	2.95973	-11.7373	8.21041e-32	3.62533e-28
Contig143527	ref|XP_011689749.1| PREDICTED: sodium channel protein para [Wasmannia auropunctata]	2.58933	-34.6037	2.95749	-11.7004	1.26898e-31	5.43344e-28
Contig61320	ref|XP_011065370.1| PREDICTED: coiled-coil domain-containing protein 142 [Acromyrmex echinatior]	0.340056	-34.5609	2.96521	-11.6554	2.15269e-31	8.94612e-28
Contig105290	ref|XP_011707950.1| PREDICTED: uncharacterized protein LOC105462798 [Wasmannia auropunctata]	0.511564	-34.4493	2.95835	-11.6448	2.43974e-31	9.84937e-28
Contig48324	ref|XP_012057922.1| PREDICTED: uncharacterized protein LOC105621060 [Atta cephalotes]	0.217708	-34.2986	2.96584	-11.5645	6.23186e-31	2.31722e-27
Contig33859	#N/A	0.241975	-34.2654	2.96567	-11.554	7.04538e-31	2.55254e-27
Contig146447	#N/A	0.207971	-34.1307	2.96811	-11.4991	1.33261e-30	4.37893e-27
Contig54560	ref|XP_011859678.1| PREDICTED: DNA excision repair protein ERCC-1 [Vollenhovia emeryi]	0.669805	-34.1225	2.95945	-11.53	9.31275e-31	3.28966e-27
Contig75149	ref|XP_011174930.1| PREDICTED: uncharacterized protein LOC105207195, partial [Solenopsis invicta]	0.347001	-34.1169	2.96622	-11.5018	1.29172e-30	4.34564e-27
Contig85073	ref|XP_011859609.1| PREDICTED: uncharacterized protein LOC105557074 [Vollenhovia emeryi]	0.220541	-34.0741	2.96663	-11.4858	1.55487e-30	4.81435e-27
Contig110625	#N/A	1.0559	-34.0173	2.95693	-11.5043	1.25552e-30	4.32687e-27
Contig135166	ref|XP_012539411.1| PREDICTED: uncharacterized protein LOC105838413 [Monomorium pharaonis]	1.05803	-33.9284	2.95412	-11.4851	1.56734e-30	4.81435e-27
Contig76519	ref|XP_011881054.1| PREDICTED: uncharacterized protein LOC105569309 [Vollenhovia emeryi]	0.398797	-33.8046	2.96536	-11.3998	4.19042e-30	1.23353e-26
Contig85700	ref|XP_012537230.1| PREDICTED: myelin expression factor 2-like isoform X1 [Monomorium pharaonis]	1.50298	-33.7251	2.96342	-11.3805	5.23189e-30	1.50867e-26
Contig149794	ref|XP_011692191.1| PREDICTED: tectonin beta-propeller repeat-containing protein isoform X2 [Wasmannia auropunctata]	2.80865	-33.5257	2.96329	-11.3137	1.12278e-29	3.11588e-26
Contig141166	ref|XP_011693188.1| PREDICTED: E3 ubiquitin-protein ligase NEDD4 isoform X3 [Wasmannia auropunctata]	3.25606	-33.523	2.96309	-11.3135	1.12465e-29	3.11588e-26
Contig141627	#N/A	0.484945	-33.3945	2.96076	-11.279	1.66573e-29	4.35858e-26
Contig46907	ref|XP_011883915.1| PREDICTED: uncharacterized protein LOC105571054 isoform X1 [Vollenhovia emeryi]	1.5551	-33.2502	2.96354	-11.2198	3.2616e-29	8.37916e-26
Contig139439	ref|XP_011161679.1| PREDICTED: sodium-coupled monocarboxylate transporter 1-like isoform X2 [Solenopsis invicta]	1.30128	-33.0849	2.96345	-11.1643	6.09527e-29	1.4849e-25
Contig149653	ref|XP_011640702.1| PREDICTED: tubulin polyglutamylase TTLL5 isoform X2 [Pogonomyrmex barbatus]	1.66926	-33.0054	2.96343	-11.1376	8.23211e-29	1.97148e-25
Contig88694	ref|XP_011881241.1| PREDICTED: constitutive coactivator of PPAR-gamma-like protein 1 homolog isoform X2 [Vollenhovia emeryi]	0.640113	-32.6491	2.96423	-11.0144	3.25818e-28	7.67285e-25
Contig45479	ref|XP_011173391.1| PREDICTED: probable cytochrome P450 6a13 [Solenopsis invicta]	1.56931	-32.6176	2.96423	-11.0037	3.66727e-28	8.49466e-25
Contig36039	ref|XP_011701811.1| PREDICTED: exportin-4-like isoform X1 [Wasmannia auropunctata]	3.02444	-32.5389	2.96362	-10.9794	4.79837e-28	1.09354e-24
Contig49805	ref|XP_011866663.1| PREDICTED: uncharacterized protein LOC105561363 isoform X1 [Vollenhovia emeryi]	2.88801	-32.5214	2.96319	-10.9751	5.03448e-28	1.12914e-24
Contig119477	ref|XP_013196887.1| PREDICTED: polyubiquitin, partial [Amyelois transitella]	0.31601	-32.2571	2.96495	-10.8794	1.44437e-27	3.13978e-24
Contig87838	ref|XP_012061274.1| PREDICTED: ribosomal protein S6 kinase 2 beta [Atta cephalotes]	1.1928	-32.2424	2.9641	-10.8776	1.47329e-27	3.15412e-24
Contig137028	ref|XP_011058460.1| PREDICTED: sodium- and chloride-dependent GABA transporter 1 isoform X2 [Acromyrmex echinatior]	1.28857	-32.1403	2.96378	-10.8444	2.12102e-27	4.40726e-24
Contig91609	ref|XP_011703131.1| PREDICTED: frataxin homolog, mitochondrial [Wasmannia auropunctata]	0.713022	-32.0943	2.96182	-10.836	2.32451e-27	4.7601e-24
Contig109536	ref|XP_014485513.1| PREDICTED: LOW QUALITY PROTEIN: collagen alpha-1(II) chain-like [Dinoponera quadriceps]	1.24863	-32.0706	2.96366	-10.8213	2.72955e-27	5.50967e-24
Contig68492	#N/A	0.602529	-31.9756	2.95928	-10.8052	3.25207e-27	6.47193e-24
Contig69591	ref|XP_011065034.1| PREDICTED: cytochrome P450 9e2-like [Acromyrmex echinatior]	0.31303	-31.9401	2.96093	-10.7872	3.95834e-27	7.76809e-24
Contig95250	ref|XP_011694694.1| PREDICTED: soluble guanylate cyclase 88E [Wasmannia auropunctata]	1.1179	-31.8941	2.96164	-10.7691	4.81927e-27	9.32806e-24
Contig104214	ref|XP_011866029.1| PREDICTED: dynein beta chain, ciliary [Vollenhovia emeryi]	1.28702	-31.7912	2.95952	-10.742	6.46241e-27	1.23394e-23
Contig105024	#N/A	1.62589	-31.4346	2.96323	-10.6082	2.72884e-26	5.00749e-23
Contig48233	ref|XP_011858511.1| PREDICTED: putative nuclease HARBI1 isoform X5 [Vollenhovia emeryi]	1.12559	-30.921	2.96339	-10.4343	1.72826e-25	3.05247e-22
Contig66948	ref|XP_011877076.1| PREDICTED: uncharacterized protein LOC105567114 isoform X1 [Vollenhovia emeryi]	1.67805	-30.9091	2.95377	-10.4643	1.26061e-25	2.25469e-22
Contig139506	#N/A	0.432748	-30.8828	2.96023	-10.4326	1.76069e-25	3.07136e-22
Contig72432	ref|XP_011875667.1| PREDICTED: DNA repair and recombination protein RAD54B-like isoform X3 [Vollenhovia emeryi]	0.795533	-30.5026	2.9645	-10.2893	7.87594e-25	1.29401e-21
Contig32843	#N/A	0.450628	-30.405	2.96478	-10.2554	1.11886e-24	1.77631e-21
Contig137306	ref|XP_012522436.1| PREDICTED: glycerol-3-phosphate dehydrogenase [NAD(+)], cytoplasmic-like isoform X2 [Monomorium pharaonis]	1.32651	-30.397	2.96338	-10.2576	1.09422e-24	1.75694e-21
Contig74251	ref|XP_011162439.1| PREDICTED: regulatory protein MIG1-like [Solenopsis invicta]	1.35673	-30.3158	2.9635	-10.2297	1.45951e-24	2.29138e-21
Contig105787	ref|XP_011646738.1| PREDICTED: RNA-directed DNA polymerase from mobile element jockey-like [Pogonomyrmex barbatus]	8.39421	-29.9944	2.9643	-10.1185	4.57244e-24	7.02252e-21
Contig104289	#N/A	0.345184	-29.9487	2.96275	-10.1084	5.06977e-24	7.70262e-21
Contig24167	ref|XP_011646195.1| PREDICTED: retinoid-inducible serine carboxypeptidase-like isoform X1 [Pogonomyrmex barbatus]	32.4025	-29.9202	2.97132	-10.0697	7.52123e-24	1.11866e-20
Contig137031	ref|XP_012056000.1| PREDICTED: sodium- and chloride-dependent GABA transporter 1 [Atta cephalotes]	1.07527	-29.8505	2.9637	-10.0721	7.34303e-24	1.10377e-20
Contig13054	ref|XP_011859191.1| PREDICTED: uncharacterized protein LOC105556710 [Vollenhovia emeryi]	0.896859	-29.8305	2.96357	-10.0657	7.82961e-24	1.1524e-20
Contig37294	ref|XP_011688058.1| PREDICTED: FAD synthase-like [Wasmannia auropunctata]	1.37837	-29.6719	2.96373	-10.0117	1.35429e-23	1.95262e-20
Contig51551	ref|XP_011631511.1| PREDICTED: uncharacterized protein LOC105423464 [Pogonomyrmex barbatus]	0.579867	-29.5708	2.96229	-9.98243	1.81964e-23	2.55669e-20
Contig134953	ref|XP_011631748.1| PREDICTED: anoctamin-4 [Pogonomyrmex barbatus]	0.507975	-29.5177	2.96474	-9.95625	2.36826e-23	3.24742e-20
Contig101747	#N/A	0.179346	-29.5139	2.96718	-9.94677	2.60495e-23	3.42201e-20
Contig132093	#N/A	0.179346	-29.5139	2.96718	-9.94677	2.60495e-23	3.42201e-20
Contig139670	#N/A	0.179346	-29.5139	2.96718	-9.94677	2.60495e-23	3.42201e-20
Contig146030	#N/A	0.236495	-29.5014	2.96605	-9.94637	2.6156e-23	3.42201e-20
Contig16247	ref|XP_011860974.1| PREDICTED: beta-1,4-glucuronyltransferase 1-like [Vollenhovia emeryi]	1.87398	-29.4974	2.95817	-9.97149	2.03166e-23	2.81438e-20
Contig109608	ref|XP_011056082.1| PREDICTED: set1/Ash2 histone methyltransferase complex subunit ASH2 isoform X1 [Acromyrmex echinatior]	2.9444	-29.3714	2.96335	-9.91154	3.7089e-23	4.80786e-20
Contig37875	ref|XP_015121222.1| PREDICTED: uncharacterized protein LOC107044011 [Diachasma alloeum]	21.8184	-29.3641	2.96463	-9.90481	3.96731e-23	5.09608e-20
Contig37857	ref|XP_011056923.1| PREDICTED: inhibitor of nuclear factor kappa-B kinase subunit beta-like isoform X1 [Acromyrmex echinatior]	0.566664	-29.286	2.96411	-9.8802	5.0734e-23	6.28821e-20
Contig138312	#N/A	0.433758	-29.2625	2.95899	-9.88935	4.63011e-23	5.79608e-20
Contig132560	#N/A	0.264476	-29.2491	2.96452	-9.86638	5.82303e-23	7.15458e-20
Contig122465	#N/A	0.159467	-29.2272	2.96749	-9.84914	6.91312e-23	8.278e-20
Contig136743	#N/A	0.159467	-29.2272	2.96749	-9.84914	6.91312e-23	8.278e-20
Contig149191	#N/A	0.512573	-29.2077	2.96409	-9.85386	6.59579e-23	8.03418e-20
Contig22242	#N/A	0.192496	-29.1143	2.96627	-9.81515	9.68949e-23	1.1505e-19
Contig92159	#N/A	0.209181	-29.0525	2.96656	-9.79334	1.2026e-22	1.40433e-19
Contig100731	ref|XP_011869979.1| PREDICTED: type-1 angiotensin II receptor-associated protein isoform X2 [Vollenhovia emeryi]	0.660359	-29.0274	2.96363	-9.79455	1.18827e-22	1.39916e-19
Contig97502	ref|XP_011691082.1| PREDICTED: Bardet-Biedl syndrome 1 protein isoform X1 [Wasmannia auropunctata]	0.547768	-29.0184	2.9643	-9.78927	1.25195e-22	1.44997e-19
Contig84027	#N/A	1.08856	-28.9799	2.96423	-9.77655	1.41964e-22	1.61767e-19
Contig35124	ref|XP_011691488.1| PREDICTED: regulating synaptic membrane exocytosis protein 2 [Wasmannia auropunctata]	2.26053	-28.915	2.95901	-9.77184	1.48722e-22	1.68112e-19
Contig71088	#N/A	0.281829	-28.867	2.96273	-9.7434	1.96855e-22	2.19016e-19
Contig113756	#N/A	0.69025	-28.8394	2.95832	-9.74856	1.87102e-22	2.09817e-19
Contig105643	ref|XP_014209289.1| PREDICTED: uncharacterized protein LOC106639961 [Copidosoma floridanum]	0.655969	-28.782	2.96039	-9.72236	2.42098e-22	2.65176e-19
Contig144442	#N/A	0.418412	-28.7721	2.96057	-9.71842	2.51659e-22	2.73528e-19
Contig139165	#N/A	0.239419	-28.74	2.9658	-9.69047	3.31017e-22	3.54331e-19
Contig140457	#N/A	0.239419	-28.74	2.9658	-9.69047	3.31017e-22	3.54331e-19
Contig130322	#N/A	0.169625	-28.6894	2.96693	-9.6697	4.0557e-22	4.24487e-19
Contig45912	#N/A	0.169625	-28.6894	2.96693	-9.6697	4.0557e-22	4.24487e-19
Contig119836	ref|XP_011163964.1| PREDICTED: putative aminopeptidase W07G4.4 [Solenopsis invicta]	1.7557	-28.6581	2.96361	-9.66999	4.04404e-22	4.24487e-19
Contig133666	ref|XP_011175070.1| PREDICTED: craniofacial development protein 2-like [Solenopsis invicta]	0.269249	-28.6247	2.96521	-9.65351	4.7501e-22	4.89909e-19
Contig103500	ref|XP_011705104.1| PREDICTED: uncharacterized protein LOC105460357 [Wasmannia auropunctata]	0.189504	-28.6007	2.96655	-9.64106	5.36325e-22	5.41294e-19
Contig105543	#N/A	0.189504	-28.6007	2.96655	-9.64106	5.36325e-22	5.41294e-19
Contig59572	ref|XP_011858256.1| PREDICTED: probable cytochrome P450 4p3 [Vollenhovia emeryi]	0.354055	-28.5611	2.96378	-9.63674	5.5935e-22	5.60528e-19
Contig143846	ref|XP_011883140.1| PREDICTED: uncharacterized protein LOC105570507 [Vollenhovia emeryi]	0.694678	-28.5415	2.95801	-9.6489	4.96852e-22	5.08722e-19
Contig106630	#N/A	0.332196	-28.4355	2.96097	-9.60346	7.73079e-22	7.69251e-19
Contig104510	#N/A	0.407284	-28.4256	2.96499	-9.58709	9.06077e-22	8.95286e-19
Contig119928	ref|XP_011064563.1| PREDICTED: kinesin-like protein KIF16B isoform X1 [Acromyrmex echinatior]	0.54814	-28.4083	2.9639	-9.58476	9.26715e-22	9.0932e-19
Contig55533	#N/A	0.227081	-28.3802	2.96547	-9.57021	1.06684e-21	1.0396e-18
Contig120688	#N/A	0.313542	-28.3038	2.96536	-9.54482	1.36342e-21	1.31052e-18
Contig37654	ref|XP_012522496.1| PREDICTED: putative adenosylhomocysteinase 2 isoform X2 [Monomorium pharaonis]	1.0794	-28.2999	2.9637	-9.54881	1.3119e-21	1.26964e-18
Contig142217	ref|XP_011684509.1| PREDICTED: splicing factor, suppressor of white-apricot homolog isoform X2 [Wasmannia auropunctata]	2.39466	-28.1122	2.96455	-9.48278	2.47609e-21	2.31698e-18
Contig54047	#N/A	0.240377	-27.9943	2.96647	-9.43692	3.83898e-21	3.49959e-18
Contig96778	#N/A	0.622559	-27.9788	2.96437	-9.43836	3.78673e-21	3.47438e-18
Contig32443	ref|XP_014480864.1| PREDICTED: microtubule-associated serine/threonine-protein kinase 3 isoform X2 [Dinoponera quadriceps]	0.389018	-27.9684	2.95945	-9.45055	3.37066e-21	3.11283e-18
Contig73264	ref|XP_011058726.1| PREDICTED: transmembrane protein 39A isoform X2 [Acromyrmex echinatior]	0.738451	-27.9656	2.96401	-9.43504	3.90837e-21	3.54001e-18
Contig137296	ref|XP_011879569.1| PREDICTED: uncharacterized protein LOC105568477 isoform X1 [Vollenhovia emeryi]	0.882415	-27.9525	2.96375	-9.43144	4.04491e-21	3.64034e-18
Contig76784	#N/A	0.524706	-27.9488	2.96452	-9.42777	4.18887e-21	3.74604e-18
Contig133821	#N/A	0.229199	-27.918	2.96583	-9.41321	4.81197e-21	4.22309e-18
Contig49041	#N/A	0.565462	-27.9011	2.96037	-9.42486	4.30688e-21	3.82735e-18
Contig109201	#N/A	0.442509	-27.8647	2.96045	-9.41234	4.85205e-21	4.23198e-18
Contig130289	ref|XP_012227107.1| PREDICTED: LOW QUALITY PROTEIN: uncharacterized protein LOC105674960 [Linepithema humile]	0.653024	-27.8563	2.96429	-9.3973	5.59798e-21	4.85262e-18
Contig51956	ref|XP_011170764.1| PREDICTED: uncharacterized protein LOC105203618 [Solenopsis invicta]	0.524741	-27.8543	2.95891	-9.41372	4.78871e-21	4.22309e-18
Contig84523	ref|XP_011865236.1| PREDICTED: vacuolar protein sorting-associated protein 13A-like isoform X2 [Vollenhovia emeryi]	0.321881	-27.8178	2.96336	-9.38726	6.15842e-21	5.30589e-18
Contig68229	#N/A	0.392796	-27.7501	2.96431	-9.36142	7.86699e-21	6.61656e-18
Contig18321	ref|XP_011879621.1| PREDICTED: voltage-dependent calcium channel type A subunit alpha-1-like isoform X6 [Vollenhovia emeryi]	0.364091	-27.7403	2.96469	-9.35691	8.2106e-21	6.86469e-18
Contig35225	#N/A	0.59925	-27.7392	2.95601	-9.38401	6.35094e-21	5.43859e-18
Contig50298	#N/A	0.393024	-27.687	2.96312	-9.34386	9.2883e-21	7.63028e-18
Contig135925	#N/A	0.309651	-27.6628	2.9653	-9.32885	1.07025e-20	8.69099e-18
Contig119377	#N/A	0.261289	-27.6513	2.9651	-9.32558	1.10382e-20	8.86172e-18
Contig135077	ref|XP_011702725.1| PREDICTED: molybdenum cofactor sulfurase 3 [Wasmannia auropunctata]	1.67692	-27.6503	2.95976	-9.34207	9.44662e-21	7.71549e-18
Contig115494	#N/A	0.327	-27.6308	2.9622	-9.32782	1.08074e-20	8.726e-18
Contig76818	ref|XP_012522226.1| PREDICTED: serine protease 27-like [Monomorium pharaonis]	0.857141	-27.5853	2.96451	-9.30519	1.33752e-20	1.05579e-17
Contig104762	ref|XP_012524115.1| PREDICTED: uncharacterized protein LOC105829641 [Monomorium pharaonis]	0.74385	-27.5607	2.96493	-9.29557	1.46426e-20	1.14307e-17
Contig2560	ref|XP_011688257.1| PREDICTED: uncharacterized protein LOC105450208 isoform X1 [Wasmannia auropunctata]	0.864942	-27.5574	2.95893	-9.3133	1.2392e-20	9.83684e-18
Contig25263	#N/A	0.540328	-27.5428	2.96109	-9.30154	1.3842e-20	1.08657e-17
Contig60989	ref|XP_012540424.1| PREDICTED: transcriptional adapter 2B isoform X2 [Monomorium pharaonis]	1.8389	-27.5323	2.95428	-9.31945	1.16947e-20	9.3357e-18
Contig64138	ref|XP_011861500.1| PREDICTED: polycomb protein suz12-B [Vollenhovia emeryi]	1.19707	-27.5286	2.96335	-9.2897	1.5472e-20	1.2007e-17
Contig81039	ref|XP_014470757.1| PREDICTED: guanine nucleotide-binding protein subunit beta-5 [Dinoponera quadriceps]	1.56828	-27.5105	2.96157	-9.28916	1.55508e-20	1.2007e-17
Contig119930	ref|XP_011064563.1| PREDICTED: kinesin-like protein KIF16B isoform X1 [Acromyrmex echinatior]	1.12196	-27.4882	2.96371	-9.27493	1.77743e-20	1.36492e-17
Contig133474	ref|XP_011647212.1| PREDICTED: LOW QUALITY PROTEIN: vacuolar protein sorting-associated protein 51 homolog [Pogonomyrmex barbatus]	1.58564	-27.4778	2.96338	-9.27244	1.81944e-20	1.38963e-17
Contig17145	ref|XP_011864539.1| PREDICTED: cytochrome P450 4c3-like [Vollenhovia emeryi]	0.755744	-27.4776	2.96364	-9.27157	1.83432e-20	1.39346e-17
Contig132912	ref|XP_011686750.1| PREDICTED: POC1 centriolar protein homolog A-like isoform X1 [Wasmannia auropunctata]	0.440791	-27.4461	2.96449	-9.25828	2.07752e-20	1.56977e-17
Contig100450	#N/A	0.630153	-27.4081	2.96403	-9.2469	2.31098e-20	1.73688e-17
Contig104179	#N/A	0.345516	-27.3704	2.96491	-9.23146	2.6698e-20	1.98545e-17
Contig147542	ref|XP_012525196.1| PREDICTED: zinc finger protein 850-like isoform X1 [Monomorium pharaonis]	0.363942	-27.2918	2.96083	-9.21761	3.03799e-20	2.24743e-17
Contig62627	ref|XP_011687158.1| PREDICTED: 4-nitrophenylphosphatase-like [Wasmannia auropunctata]	0.366352	-27.2883	2.96437	-9.20542	3.40335e-20	2.5046e-17
Contig52254	ref|XP_011861775.1| PREDICTED: uncharacterized protein LOC105558607 isoform X2 [Vollenhovia emeryi]	0.810515	-27.0829	2.96893	-9.12211	7.36776e-20	5.31144e-17
Contig144396	#N/A	0.334231	-27.0627	2.96455	-9.12877	6.92788e-20	5.01995e-17
Contig52192	ref|XP_012224457.1| PREDICTED: uncharacterized protein LOC105673392 [Linepithema humile]	0.559887	-27.0144	2.96395	-9.11433	7.91567e-20	5.67746e-17
Contig115508	#N/A	0.380166	-26.9813	2.96451	-9.10143	8.91517e-20	6.29843e-17
Contig138037	ref|XP_012217769.1| PREDICTED: uncharacterized SDCCAG3 family protein-like [Linepithema humile]	0.365925	-26.9704	2.9644	-9.0981	9.19275e-20	6.46223e-17
Contig23125	ref|XP_011173491.1| PREDICTED: transient receptor potential cation channel protein painless-like [Solenopsis invicta]	13.9451	-26.9629	2.96606	-9.09046	9.86217e-20	6.89849e-17
Contig149731	ref|XP_012225889.1| PREDICTED: uncharacterized protein LOC105674266 [Linepithema humile]	0.399129	-26.9624	2.95927	-9.11118	8.1493e-20	5.80451e-17
Contig115977	#N/A	0.304795	-26.919	2.96576	-9.07662	1.12002e-19	7.68227e-17
Contig17456	ref|XP_012056871.1| PREDICTED: F-box/LRR-repeat protein 4-like [Atta cephalotes]	0.437713	-26.8719	2.96084	-9.07576	1.1289e-19	7.70583e-17
Contig86305	#N/A	0.824457	-26.8592	2.95576	-9.08707	1.01747e-19	7.04734e-17
Contig78817	#N/A	0.548833	-26.819	2.95639	-9.07155	1.17331e-19	7.97045e-17
Contig84077	ref|XP_011066196.1| PREDICTED: uncharacterized protein LOC105153184 [Acromyrmex echinatior]	0.26062	-26.7812	2.9657	-9.03032	1.71172e-19	1.14626e-16
Contig36663	#N/A	0.328575	-26.7418	2.96131	-9.03042	1.71019e-19	1.14626e-16
Contig34077	#N/A	0.634499	-26.7221	2.95841	-9.03259	1.67657e-19	1.13347e-16
Contig144951	ref|XP_014246261.1| PREDICTED: retrovirus-related Pol polyprotein from transposon TNT 1-94 [Cimex lectularius]	0.211374	-26.7203	2.96546	-9.01049	2.05143e-19	1.35449e-16
Contig102921	#N/A	2.89138	-26.6774	2.96474	-8.99823	2.29379e-19	1.50049e-16
Contig126217	#N/A	0.230299	-26.6362	2.96584	-8.981	2.6831e-19	1.73905e-16
Contig119452	#N/A	0.279691	-26.6178	2.96487	-8.97775	2.7636e-19	1.78305e-16
Contig42878	#N/A	0.333604	-26.6082	2.9653	-8.9732	2.88015e-19	1.8498e-16
Contig76834	#N/A	0.304002	-26.5998	2.96468	-8.97223	2.90572e-19	1.85778e-16
Contig54310	ref|XP_008546343.2| PREDICTED: uncharacterized protein LOC103570404 isoform X2 [Microplitis demolitor]	0.598252	-26.5254	2.96092	-8.95853	3.29044e-19	2.07557e-16
Contig52829	ref|XP_012539445.1| PREDICTED: xenotropic and polytropic retrovirus receptor 1-like isoform X2 [Monomorium pharaonis]	0.428127	-26.4762	2.96482	-8.93012	4.25546e-19	2.62569e-16
Contig20704	ref|XP_012232433.1| PREDICTED: microtubule organizer protein 1-like [Linepithema humile]	0.423203	-26.4685	2.96465	-8.92804	4.33631e-19	2.65242e-16
Contig67758	#N/A	0.469647	-26.4601	2.96451	-8.92563	4.43178e-19	2.69912e-16
Contig67643	ref|XP_012522862.1| PREDICTED: SCY1-like protein 2 isoform X2 [Monomorium pharaonis]	0.819914	-26.425	2.96392	-8.91557	4.85323e-19	2.93054e-16
Contig79859	#N/A	0.318063	-26.3328	2.96393	-8.8844	6.42647e-19	3.84763e-16
Contig130896	ref|XP_012552318.1| PREDICTED: uncharacterized protein LOC105842679 [Bombyx mori]	0.467706	-26.3064	2.96379	-8.87595	6.93411e-19	4.09945e-16
Contig101813	#N/A	0.221584	-26.2978	2.96615	-8.86597	7.58419e-19	4.40997e-16
Contig2998	#N/A	0.26168	-26.2839	2.965	-8.86471	7.67064e-19	4.44196e-16
Contig146213	ref|XP_011159909.1| PREDICTED: protein quiver [Solenopsis invicta]	0.455804	-26.2763	2.96543	-8.86086	7.94005e-19	4.54213e-16
Contig88988	ref|XP_015119540.1| PREDICTED: uncharacterized protein LOC107042851 [Diachasma alloeum]	0.423353	-26.2745	2.9647	-8.86244	7.82805e-19	4.49626e-16
Contig131823	#N/A	0.38117	-26.2744	2.9646	-8.86272	7.80856e-19	4.49626e-16
Contig79143	#N/A	0.6331	-26.2712	2.96753	-8.8529	8.52723e-19	4.83884e-16
Contig41320	#N/A	0.394658	-26.2646	2.95942	-8.87492	6.99852e-19	4.12029e-16
Contig118044	#N/A	0.220536	-26.2327	2.96616	-8.844	9.23526e-19	5.21966e-16
Contig130523	#N/A	0.233925	-26.1987	2.96559	-8.83421	1.00804e-18	5.62975e-16
Contig131757	#N/A	0.431554	-26.1569	2.96318	-8.82731	1.07228e-18	5.96496e-16
Contig9562	ref|XP_011162761.1| PREDICTED: protein fem-1 homolog B, partial [Solenopsis invicta]	0.812947	-26.0783	2.96416	-8.79787	1.39433e-18	7.63624e-16
Contig150162	#N/A	0.368362	-26.0558	2.95972	-8.80347	1.32649e-18	7.29296e-16
Contig45567	ref|XP_012543383.1| PREDICTED: uncharacterized protein LOC105840848 [Monomorium pharaonis]	0.387548	-25.9392	2.96528	-8.74763	2.17871e-18	1.17498e-15
Contig100843	ref|XP_012536476.1| PREDICTED: probable cytochrome P450 12a5, mitochondrial [Monomorium pharaonis]	0.897555	-25.9035	2.96869	-8.72557	2.64837e-18	1.41745e-15
Contig12620	#N/A	0.292931	-25.8818	2.96456	-8.73039	2.53807e-18	1.36358e-15
Contig72562	ref|XP_011171576.1| PREDICTED: uncharacterized protein LOC105204222 [Solenopsis invicta]	0.32986	-25.8478	2.96553	-8.71609	2.87962e-18	1.5354e-15
Contig115981	#N/A	0.289749	-25.8162	2.96517	-8.70647	3.13474e-18	1.65272e-15
Contig149631	#N/A	0.306445	-25.8102	2.96499	-8.70498	3.17644e-18	1.66848e-15
Contig99226	#N/A	0.217871	-25.8095	2.96574	-8.70256	3.24476e-18	1.69806e-15
Contig93244	#N/A	0.505523	-25.7769	2.96479	-8.69435	3.48816e-18	1.81869e-15
Contig40737	#N/A	0.234566	-25.7736	2.96583	-8.69019	3.61825e-18	1.86752e-15
Contig139561	#N/A	0.385466	-25.7593	2.96328	-8.69283	3.53511e-18	1.8364e-15
Contig99206	#N/A	0.410674	-25.7348	2.96139	-8.69009	3.62146e-18	1.86752e-15
Contig118414	ref|XP_011161834.1| PREDICTED: uncharacterized protein C05D11.1-like isoform X1 [Solenopsis invicta]	0.416034	-25.7341	2.96632	-8.67545	4.11907e-18	2.09357e-15
Contig23566	ref|XP_011873923.1| PREDICTED: LOW QUALITY PROTEIN: dynein heavy chain 1, axonemal-like [Vollenhovia emeryi]	0.920312	-25.7011	2.95864	-8.68678	3.72858e-18	1.91577e-15
Contig37858	ref|XP_011056923.1| PREDICTED: inhibitor of nuclear factor kappa-B kinase subunit beta-like isoform X1 [Acromyrmex echinatior]	1.03732	-25.7002	2.96193	-8.67684	4.06919e-18	2.07568e-15
Contig50375	ref|XP_011859613.1| PREDICTED: uncharacterized protein LOC105557079 [Vollenhovia emeryi]	0.277318	-25.6719	2.96472	-8.65911	4.75457e-18	2.39931e-15
Contig74934	ref|XP_014664010.1| PREDICTED: LOW QUALITY PROTEIN: 60S acidic ribosomal protein P2-like [Priapulus caudatus]	0.507433	-25.6652	2.96762	-8.64842	5.22162e-18	2.60706e-15
Contig126134	ref|XP_011164546.1| PREDICTED: probable nuclear transport factor 2 isoform X1 [Solenopsis invicta]	0.571723	-25.6299	2.96422	-8.64642	5.31407e-18	2.64388e-15
Contig83974	ref|XP_011865761.1| PREDICTED: protein pelota [Vollenhovia emeryi]	0.405818	-25.6109	2.96443	-8.63938	5.65196e-18	2.79232e-15
Contig16660	ref|XP_012534556.1| PREDICTED: putative thiamine transporter SLC35F3 isoform X1 [Monomorium pharaonis]	0.656713	-25.5917	2.95591	-8.65781	4.80924e-18	2.41826e-15
Contig16240	ref|XP_011640358.1| PREDICTED: uncharacterized protein LOC105429225 [Pogonomyrmex barbatus]	1.20376	-25.5824	2.96345	-8.63261	5.99656e-18	2.95225e-15
Contig128620	#N/A	0.179645	-25.5795	2.96609	-8.62395	6.46809e-18	3.16236e-15
Contig138702	#N/A	0.179645	-25.5795	2.96609	-8.62395	6.46809e-18	3.16236e-15
Contig58364	#N/A	0.314541	-25.5638	2.96512	-8.62149	6.60861e-18	3.21992e-15
Contig96048	#N/A	0.512307	-25.5143	2.96474	-8.60594	7.56937e-18	3.66277e-15
Contig129586	#N/A	0.299319	-25.4979	2.96587	-8.5971	8.17541e-18	3.92912e-15
Contig136630	#N/A	0.265613	-25.4963	2.96517	-8.5986	8.06936e-18	3.89139e-15
Contig107946	ref|XP_011869153.1| PREDICTED: resistance to inhibitors of cholinesterase protein 3-like isoform X3 [Vollenhovia emeryi]	0.6618	-25.4412	2.96451	-8.5819	9.3316e-18	4.46959e-15
Contig77982	#N/A	0.283125	-25.3807	2.96581	-8.55774	1.15097e-17	5.47573e-15
Contig124788	ref|XP_011693189.1| PREDICTED: putative Golgi pH regulator C [Wasmannia auropunctata]	0.425291	-25.3764	2.9604	-8.57196	1.01742e-17	4.8567e-15
Contig107840	ref|XP_011873954.1| PREDICTED: pre-mRNA-splicing regulator female-lethal(2)D isoform X2 [Vollenhovia emeryi]	0.474427	-25.2091	2.96429	-8.50427	1.82741e-17	8.5217e-15
Contig44428	#N/A	0.431889	-25.2025	2.96449	-8.50148	1.87184e-17	8.70016e-15
Contig38951	#N/A	0.384388	-25.2023	2.96099	-8.51142	1.71816e-17	8.03877e-15
Contig74130	ref|XP_011175179.1| PREDICTED: tubulin epsilon chain-like [Solenopsis invicta]	0.395066	-25.1954	2.96449	-8.49908	1.91102e-17	8.82425e-15
Contig103995	#N/A	0.266569	-25.194	2.9637	-8.50086	1.88189e-17	8.71822e-15
Contig34694	#N/A	0.405871	-25.1863	2.96459	-8.49569	1.96768e-17	9.05628e-15
Contig107110	#N/A	0.253614	-25.1859	2.96492	-8.49462	1.98579e-17	9.10996e-15
Contig15635	#N/A	0.575761	-25.1631	2.96289	-8.49275	2.01802e-17	9.22784e-15
Contig123916	ref|XP_016655824.1| PREDICTED: uncharacterized protein LOC103311964 [Acyrthosiphon pisum]	0.216734	-25.128	2.96534	-8.47388	2.37362e-17	1.07841e-14
Contig97287	ref|XP_011870210.1| PREDICTED: C2 domain-containing protein 3 isoform X1 [Vollenhovia emeryi]	0.756251	-25.1266	2.96878	-8.46362	2.5921e-17	1.17232e-14
Contig68060	ref|XP_011059498.1| PREDICTED: uncharacterized protein LOC105149058, partial [Acromyrmex echinatior]	0.322392	-24.998	2.96228	-8.43878	3.20673e-17	1.43842e-14
Contig45013	#N/A	0.516359	-24.9173	2.9645	-8.40524	4.26972e-17	1.90315e-14
Contig111016	#N/A	0.191985	-24.8756	2.9664	-8.38577	5.0395e-17	2.2392e-14
Contig43919	#N/A	0.515956	-24.8604	2.96493	-8.38483	5.07999e-17	2.25012e-14
Contig33708	#N/A	0.42409	-24.7693	2.969	-8.34263	7.26534e-17	3.12028e-14
Contig113087	#N/A	0.318936	-24.7656	2.96521	-8.35206	6.70852e-17	2.9166e-14
Contig82327	#N/A	0.38627	-24.754	2.96495	-8.34886	6.89243e-17	2.98736e-14
Contig121590	#N/A	0.257093	-24.7163	2.96635	-8.33224	7.9324e-17	3.39644e-14
Contig64018	ref|XP_011687460.1| PREDICTED: uncharacterized protein LOC105449774 [Wasmannia auropunctata]	0.253568	-24.6877	2.96596	-8.3237	8.52627e-17	3.62872e-14
Contig83973	ref|XP_011865761.1| PREDICTED: protein pelota [Vollenhovia emeryi]	0.656165	-24.6734	2.96387	-8.32471	8.45342e-17	3.60859e-14
Contig41718	ref|XP_011155821.1| PREDICTED: protein amalgam-like isoform X2 [Solenopsis invicta]	0.82251	-24.6729	2.95559	-8.34786	6.95103e-17	3.00355e-14
Contig136754	#N/A	0.211167	-24.6628	2.96545	-8.31671	9.04414e-17	3.82608e-14
Contig71817	#N/A	0.352197	-24.5989	2.96517	-8.29593	1.07742e-16	4.50405e-14
Contig92812	#N/A	0.275466	-24.5976	2.96337	-8.30055	1.03631e-16	4.35798e-14
Contig57204	ref|XP_012064161.1| PREDICTED: protein MMS22-like [Atta cephalotes]	0.713828	-24.5826	2.96392	-8.29395	1.09545e-16	4.55244e-14
Contig78691	#N/A	0.4091	-24.5794	2.96326	-8.2947	1.08864e-16	4.53749e-14
Contig128997	ref|XP_011687766.1| PREDICTED: LOW QUALITY PROTEIN: A disintegrin and metalloproteinase with thrombospondin motifs 2-like [Wasmannia auropunctata]	0.935366	-24.5305	2.95379	-8.30474	1.0004e-16	4.21949e-14
Contig32269	ref|XP_011171674.1| PREDICTED: uncharacterized protein LOC105204324 [Solenopsis invicta]	0.227138	-24.5165	2.96678	-8.26367	1.41264e-16	5.8363e-14
Contig127397	#N/A	0.194167	-24.4627	2.96585	-8.24812	1.60903e-16	6.5899e-14
Contig124057	#N/A	0.235212	-24.4181	2.96533	-8.23453	1.80267e-16	7.34039e-14
Contig71982	ref|XP_011870318.1| PREDICTED: cytochrome b561 domain-containing protein 2-like isoform X1 [Vollenhovia emeryi]	0.81281	-24.3902	2.9662	-8.22269	1.98994e-16	8.07969e-14
Contig41272	ref|XP_011156932.1| PREDICTED: uncharacterized protein LOC105193941 [Solenopsis invicta]	0.848398	-24.3717	2.95453	-8.24894	1.59804e-16	6.56391e-14
Contig37559	ref|XP_011050186.1| PREDICTED: uncharacterized protein LOC105143509 isoform X1 [Acromyrmex echinatior]	0.238788	-24.3027	2.96607	-8.19358	2.53576e-16	1.0237e-13
Contig114776	ref|XP_012543251.1| PREDICTED: LOW QUALITY PROTEIN: dynein heavy chain 8, axonemal-like [Monomorium pharaonis]	0.413864	-24.2953	2.9638	-8.19733	2.45787e-16	9.95098e-14
Contig34571	#N/A	0.339471	-24.283	2.96786	-8.18198	2.79206e-16	1.12396e-13
Contig134948	#N/A	0.420089	-24.1617	2.96287	-8.15484	3.49637e-16	1.40349e-13
Contig65525	#N/A	0.286756	-24.1063	2.96568	-8.12841	4.34943e-16	1.73116e-13
Contig62231	ref|XP_011879719.1| PREDICTED: endoplasmic reticulum mannosyl-oligosaccharide 1,2-alpha-mannosidase [Vollenhovia emeryi]	0.35265	-24.0881	2.96402	-8.12681	4.40728e-16	1.74926e-13
Contig81343	#N/A	0.458781	-24.0268	2.96336	-8.10796	5.1477e-16	2.03172e-13
Contig131474	ref|XP_011157910.1| PREDICTED: uncharacterized protein LOC105194608 isoform X2 [Solenopsis invicta]	5.40482	-23.9905	2.96603	-8.08844	6.04322e-16	2.37191e-13
Contig68530	ref|XP_011159145.1| PREDICTED: uncharacterized protein LOC105195450 isoform X2 [Solenopsis invicta]	1.11762	-23.9856	2.96416	-8.09188	5.87527e-16	2.31242e-13
Contig76526	ref|XP_011877022.1| PREDICTED: sodium/potassium/calcium exchanger 4-like [Vollenhovia emeryi]	0.438408	-23.974	2.96459	-8.0868	6.12507e-16	2.39738e-13
Contig109545	ref|XP_016840399.1| PREDICTED: kappa-theraphotoxin-Gr3a-like [Nasonia vitripennis]	7.79612	-23.9388	2.96629	-8.07028	7.01357e-16	2.70944e-13
Contig107130	#N/A	0.208953	-23.8933	2.9653	-8.05761	7.78017e-16	2.99382e-13
Contig40702	#N/A	0.440715	-23.8848	2.96492	-8.05578	7.89741e-16	3.01589e-13
Contig91226	#N/A	0.234179	-23.8823	2.96568	-8.05292	8.08448e-16	3.07901e-13
Contig107152	ref|XP_011643846.1| PREDICTED: facilitated trehalose transporter Tret1-2 homolog [Pogonomyrmex barbatus]	0.449341	-23.861	2.96172	-8.05646	7.85348e-16	3.00725e-13
Contig84884	ref|XP_011881898.1| PREDICTED: DNA polymerase zeta catalytic subunit [Vollenhovia emeryi]	0.380255	-23.8596	2.96461	-8.04816	8.40504e-16	3.19249e-13
Contig68649	#N/A	0.324831	-23.8347	2.96529	-8.03792	9.13792e-16	3.4431e-13
Contig53459	ref|XP_011687947.1| PREDICTED: malate dehydrogenase, cytoplasmic [Wasmannia auropunctata]	1.15025	-23.8307	2.96269	-8.04361	8.72311e-16	3.29559e-13
Contig14973	ref|XP_011171308.1| PREDICTED: ribosome biogenesis protein BMS1 homolog [Solenopsis invicta]	9.06571	-23.8238	2.95207	-8.0702	7.01822e-16	2.70944e-13
Contig135035	#N/A	0.189148	-23.8004	2.9655	-8.02577	1.00894e-15	3.77144e-13
Contig66089	ref|XP_011067304.1| PREDICTED: isopentenyl-diphosphate Delta-isomerase 1 [Acromyrmex echinatior]	0.351223	-23.7982	2.96493	-8.02658	1.0023e-15	3.75656e-13
Contig134185	#N/A	0.230449	-23.7632	2.96517	-8.0141	1.10948e-15	4.11459e-13
Contig69986	ref|XP_012541109.1| PREDICTED: ATP-dependent DNA helicase Q5-like isoform X2 [Monomorium pharaonis]	0.572692	-23.7519	2.96624	-8.00743	1.17127e-15	4.3324e-13
Contig134528	ref|XP_011686458.1| PREDICTED: sugar transporter SWEET1 [Wasmannia auropunctata]	0.847866	-23.6993	2.9643	-7.99492	1.29663e-15	4.78356e-13
Contig31593	ref|XP_015438414.1| PREDICTED: LOW QUALITY PROTEIN: adenylate cyclase type 8-like [Dufourea novaeangliae]	0.323312	-23.6777	2.96518	-7.98524	1.40249e-15	5.1606e-13
Contig115961	ref|XP_014680357.1| PREDICTED: LOW QUALITY PROTEIN: NADH-quinone oxidoreductase subunit F-like, partial [Priapulus caudatus]	0.284118	-23.6499	2.96489	-7.97667	1.50339e-15	5.5175e-13
Contig43976	#N/A	0.298384	-23.6482	2.9654	-7.97473	1.52711e-15	5.59004e-13
Contig141878	#N/A	0.259275	-23.6355	2.96548	-7.97021	1.58399e-15	5.78327e-13
Contig51681	#N/A	0.322754	-23.5649	2.96541	-7.94658	1.91734e-15	6.94651e-13
Contig140371	ref|XP_011864749.1| PREDICTED: uncharacterized protein LOC105560328 [Vollenhovia emeryi]	0.651267	-23.5619	2.96493	-7.94688	1.91275e-15	6.94651e-13
Contig83809	ref|XP_011643824.1| PREDICTED: ATPase WRNIP1-like [Pogonomyrmex barbatus]	0.843456	-23.5341	2.96599	-7.93465	2.11092e-15	7.58947e-13
Contig80126	#N/A	0.383624	-23.5332	2.96515	-7.93658	2.07839e-15	7.49158e-13
Contig37505	#N/A	0.424401	-23.5136	2.96441	-7.93197	2.15697e-15	7.73538e-13
Contig288	#N/A	0.353507	-23.4826	2.96367	-7.92347	2.30972e-15	8.24132e-13
Contig42285	ref|XP_011162654.1| PREDICTED: TRAF3-interacting protein 1 [Solenopsis invicta]	0.405215	-23.4697	2.96527	-7.91486	2.47537e-15	8.788e-13
Contig81632	ref|XP_014477283.1| PREDICTED: uncharacterized protein LOC106745835 [Dinoponera quadriceps]	0.321905	-23.4595	2.96197	-7.92024	2.37044e-15	8.43666e-13
Contig85183	#N/A	0.385224	-23.4262	2.96386	-7.90394	2.70231e-15	9.54571e-13
Contig105418	ref|XP_012153868.1| PREDICTED: 52 kDa repressor of the inhibitor of the protein kinase-like isoform X2 [Megachile rotundata]	1.57346	-23.3921	2.96341	-7.89365	2.93466e-15	1.03149e-12
Contig143473	#N/A	0.277269	-23.3889	2.96446	-7.88977	3.02748e-15	1.06147e-12
Contig55423	#N/A	0.223238	-23.3459	2.96712	-7.86818	3.59829e-15	1.25538e-12
Contig82559	#N/A	0.184859	-23.3169	2.96629	-7.86063	3.82199e-15	1.33014e-12
Contig36323	#N/A	0.232701	-23.3131	2.9665	-7.8588	3.87838e-15	1.34645e-12
Contig149943	#N/A	0.185012	-23.2983	2.9661	-7.85486	4.00207e-15	1.38579e-12
Contig37922	#N/A	0.223964	-23.2866	2.96601	-7.85117	4.1219e-15	1.42052e-12
Contig30076	#N/A	5.02934	-23.2721	2.97132	-7.83223	4.79291e-15	1.62015e-12
Contig139111	#N/A	0.379141	-23.27	2.96488	-7.84856	4.20854e-15	1.44685e-12
Contig150198	ref|XP_014296508.1| PREDICTED: uncharacterized protein LOC103571862 [Microplitis demolitor]	0.299073	-23.2578	2.96105	-7.85457	4.01133e-15	1.38579e-12
Contig25802	ref|XP_011873945.1| PREDICTED: chymotrypsin-1-like [Vollenhovia emeryi]	5.70522	-23.2378	2.97132	-7.82071	5.25254e-15	1.75454e-12
Contig72583	#N/A	0.277697	-23.2365	2.96492	-7.83714	4.60931e-15	1.56935e-12
Contig138336	#N/A	0.262501	-23.236	2.96206	-7.84455	4.34503e-15	1.48654e-12
Contig38840	#N/A	0.326563	-23.2326	2.96481	-7.8361	4.64759e-15	1.57858e-12
Contig39636	#N/A	5.8988	-23.227	2.97133	-7.81705	5.40752e-15	1.80204e-12
Contig73827	ref|XP_012532151.1| PREDICTED: uncharacterized protein LOC105834307 isoform X1 [Monomorium pharaonis]	0.757136	-23.2221	2.96359	-7.83578	4.65928e-15	1.57876e-12
Contig93764	ref|XP_012535632.1| PREDICTED: uncharacterized protein LOC105836254 isoform X2 [Monomorium pharaonis]	0.386711	-23.2127	2.96546	-7.8277	4.9688e-15	1.66764e-12
Contig126804	#N/A	0.231	-23.2107	2.96607	-7.82539	5.061e-15	1.69456e-12
Contig73653	ref|XP_011877556.1| PREDICTED: polypyrimidine tract-binding protein 1 isoform X6 [Vollenhovia emeryi]	0.430806	-23.2075	2.96438	-7.82881	4.92495e-15	1.65686e-12
Contig74280	ref|XP_011882433.1| PREDICTED: uncharacterized protein LOC105570082, partial [Vollenhovia emeryi]	5.94452	-23.1968	2.97133	-7.80687	5.86247e-15	1.94906e-12
Contig48265	ref|XP_012223976.1| PREDICTED: LOW QUALITY PROTEIN: transient receptor potential cation channel protein painless [Linepithema humile]	0.272758	-23.0979	2.96702	-7.78486	6.97893e-15	2.30398e-12
Contig64900	#N/A	0.34399	-23.0811	2.96551	-7.78317	7.07322e-15	2.32424e-12
Contig139902	ref|XP_011865370.1| PREDICTED: 1-phosphatidylinositol 4,5-bisphosphate phosphodiesterase gamma-1 isoform X3 [Vollenhovia emeryi]	0.333275	-23.0783	2.96465	-7.7845	6.99921e-15	2.30528e-12
Contig54674	ref|XP_011069309.1| PREDICTED: F-box/WD repeat-containing protein 9-like [Acromyrmex echinatior]	0.228313	-23.0609	2.96537	-7.77673	7.44214e-15	2.43979e-12
Contig35048	#N/A	0.39588	-23.0549	2.96572	-7.7738	7.61659e-15	2.49121e-12
Contig139829	#N/A	0.254647	-23.054	2.9668	-7.77065	7.80836e-15	2.54216e-12
Contig19528	#N/A	0.28457	-22.9858	2.96265	-7.75852	8.5924e-15	2.77822e-12
Contig145368	ref|XP_011168289.1| PREDICTED: integrator complex subunit 8-like [Solenopsis invicta]	0.313934	-22.9806	2.96187	-7.75883	8.57177e-15	2.7779e-12
Contig87743	ref|XP_011161143.1| PREDICTED: apyrase-like [Solenopsis invicta]	0.431451	-22.9796	2.96217	-7.75768	8.64954e-15	2.79031e-12
Contig115224	ref|XP_012536971.1| PREDICTED: 5-hydroxytryptamine receptor 1-like isoform X1 [Monomorium pharaonis]	0.365856	-22.9635	2.95951	-7.75924	8.54369e-15	2.77517e-12
Contig16320	ref|XP_012538989.1| PREDICTED: uncharacterized protein LOC105838180 isoform X2 [Monomorium pharaonis]	0.392842	-22.9633	2.96525	-7.74415	9.62227e-15	3.09e-12
Contig71764	#N/A	0.258712	-22.9633	2.96616	-7.74175	9.80605e-15	3.14187e-12
Contig103422	#N/A	0.209935	-22.9528	2.9655	-7.73992	9.94788e-15	3.1801e-12
Contig132535	#N/A	0.237661	-22.9387	2.96569	-7.7347	1.03648e-14	3.3059e-12
Contig61753	#N/A	0.274765	-22.909	2.96711	-7.72098	1.1544e-14	3.65724e-12
Contig2912	#N/A	0.180164	-22.8983	2.96684	-7.71809	1.18086e-14	3.73271e-12
Contig79238	#N/A	0.227361	-22.8804	2.96702	-7.71156	1.2429e-14	3.92006e-12
Contig100492	#N/A	0.274712	-22.8154	2.96481	-7.69541	1.41037e-14	4.42847e-12
Contig34359	#N/A	0.241754	-22.8124	2.96581	-7.69182	1.45059e-14	4.54466e-12
Contig45374	#N/A	0.302909	-22.7782	2.96578	-7.68035	1.58656e-14	4.9487e-12
Contig134758	#N/A	0.277668	-22.7772	2.96402	-7.68456	1.5353e-14	4.7994e-12
Contig40255	#N/A	0.378981	-22.7684	2.96534	-7.67818	1.6136e-14	5.01182e-12
Contig123332	ref|XP_011159479.1| PREDICTED: D-beta-hydroxybutyrate dehydrogenase, mitochondrial [Solenopsis invicta]	0.258019	-22.7638	2.96475	-7.67816	1.61389e-14	5.01182e-12
Contig108996	#N/A	6.31423	-22.7585	2.96853	-7.66659	1.76625e-14	5.47295e-12
Contig136934	#N/A	0.680529	-22.6791	2.96883	-7.63907	2.18803e-14	6.72091e-12
Contig86418	#N/A	0.284239	-22.678	2.96575	-7.64663	2.06322e-14	6.3652e-12
Contig83032	ref|XP_011637194.1| PREDICTED: intraflagellar transport protein 88 homolog [Pogonomyrmex barbatus]	1.14077	-22.6673	2.96871	-7.63541	2.25102e-14	6.88448e-12
Contig69282	ref|XP_012540538.1| PREDICTED: metabotropic glutamate receptor 8-like isoform X1 [Monomorium pharaonis]	0.263365	-22.6476	2.96555	-7.6369	2.2252e-14	6.82025e-12
Contig54721	#N/A	0.215054	-22.6472	2.96627	-7.6349	2.25991e-14	6.89672e-12
Contig111585	#N/A	9.19121	-22.643	2.97132	-7.62051	2.52684e-14	7.62895e-12
Contig37557	#N/A	0.374724	-22.636	2.96598	-7.63188	2.31359e-14	7.04533e-12
Contig66812	#N/A	0.327623	-22.5821	2.96587	-7.61398	2.65782e-14	7.97328e-12
Contig67365	#N/A	0.327623	-22.5821	2.96587	-7.61398	2.65782e-14	7.97328e-12
Contig86752	#N/A	0.286927	-22.5816	2.96552	-7.61471	2.64274e-14	7.96186e-12
Contig92129	#N/A	4.8928	-22.5711	2.97133	-7.5963	3.04719e-14	9.00751e-12
Contig144369	ref|XP_011701378.1| PREDICTED: alpha-tocopherol transfer protein-like isoform X4 [Wasmannia auropunctata]	0.335491	-22.5668	2.96548	-7.60983	2.74465e-14	8.19896e-12
Contig271	#N/A	0.335491	-22.5668	2.96548	-7.60983	2.74465e-14	8.19896e-12
Contig81574	#N/A	0.293374	-22.5642	2.96911	-7.59964	2.96946e-14	8.79613e-12
Contig65690	#N/A	0.289276	-22.5634	2.96516	-7.6095	2.75159e-14	8.20234e-12
Contig102865	#N/A	0.726487	-22.5566	2.95582	-7.63125	2.32489e-14	7.06451e-12
Contig81357	#N/A	0.274963	-22.554	2.96574	-7.60484	2.85247e-14	8.46734e-12
Contig148884	ref|XP_011699038.1| PREDICTED: mucin-6 isoform X2 [Wasmannia auropunctata]	0.185557	-22.4716	2.96642	-7.57532	3.58251e-14	1.05239e-11
Contig132785	#N/A	0.249712	-22.4665	2.96512	-7.57691	3.53878e-14	1.04171e-11
Contig95346	#N/A	0.307322	-22.4607	2.96566	-7.57361	3.62983e-14	1.06407e-11
Contig42466	#N/A	0.20682	-22.4336	2.96537	-7.56519	3.87302e-14	1.13301e-11
Contig90397	ref|XP_011878453.1| PREDICTED: uncharacterized protein LOC105567848 isoform X1 [Vollenhovia emeryi]	0.383139	-22.4197	2.96515	-7.56109	3.99714e-14	1.16691e-11
Contig140314	#N/A	0.219804	-22.4148	2.96595	-7.55737	4.11308e-14	1.19742e-11
Contig133293	ref|XP_015124771.1| PREDICTED: uncharacterized protein LOC107046627 [Diachasma alloeum]	0.270888	-22.4107	2.9668	-7.55381	4.22691e-14	1.22137e-11
Contig78407	#N/A	0.426017	-22.3966	2.96461	-7.55466	4.19963e-14	1.21597e-11
Contig141406	#N/A	0.304821	-22.3862	2.96248	-7.55658	4.13794e-14	1.20057e-11
Contig85128	#N/A	0.29827	-22.3846	2.96574	-7.54772	4.42957e-14	1.27732e-11
Contig34063	#N/A	0.168625	-22.3267	2.96701	-7.52497	5.27325e-14	1.50829e-11
Contig17184	#N/A	0.286482	-22.2921	2.96459	-7.51945	5.50062e-14	1.56383e-11
Contig118870	#N/A	0.238882	-22.2671	2.96549	-7.50875	5.9696e-14	1.68361e-11
Contig103641	#N/A	0.24905	-22.2668	2.9633	-7.51419	5.72664e-14	1.61831e-11
Contig118530	ref|XP_011870563.1| PREDICTED: DNA polymerase epsilon subunit 2 [Vollenhovia emeryi]	0.33963	-22.2037	2.96308	-7.49345	6.70841e-14	1.88445e-11
Contig125903	ref|XP_012541300.1| PREDICTED: uncharacterized protein LOC105839499 [Monomorium pharaonis]	0.596406	-22.1803	2.96546	-7.47954	7.45834e-14	2.08681e-11
Contig44943	ref|XP_975095.1| PREDICTED: mitochondrial 2-oxoglutarate/malate carrier protein [Tribolium castaneum]	0.527191	-22.1761	2.9656	-7.47777	7.55958e-14	2.11096e-11
Contig123853	ref|XP_011696082.1| PREDICTED: annexin B9-like isoform X2 [Wasmannia auropunctata]	0.292086	-22.1551	2.9657	-7.47043	7.99319e-14	2.22764e-11
Contig68645	#N/A	0.213699	-22.0951	2.96703	-7.4469	9.55599e-14	2.64752e-11
Contig76631	#N/A	0.282127	-22.0888	2.96687	-7.44517	9.68177e-14	2.67711e-11
Contig56574	#N/A	0.283563	-22.064	2.96492	-7.44166	9.9429e-14	2.74395e-11
Contig74117	ref|XP_011696914.1| PREDICTED: ubiquinone biosynthesis monooxygenase COQ6 isoform X1 [Wasmannia auropunctata]	0.616301	-22.0537	2.96876	-7.42858	1.09766e-13	3.01743e-11
Contig45058	ref|XP_011632041.1| PREDICTED: uncharacterized protein LOC105423824 [Pogonomyrmex barbatus]	0.298938	-22.0303	2.96331	-7.43436	1.05078e-13	2.8942e-11
Contig68627	ref|XP_011688622.1| PREDICTED: uncharacterized protein LOC105450468 [Wasmannia auropunctata]	0.252969	-22.0101	2.96526	-7.42266	1.14791e-13	3.14944e-11
Contig31936	#N/A	0.268631	-21.9987	2.96553	-7.41814	1.18781e-13	3.23379e-11
Contig100644	ref|XP_014482026.1| PREDICTED: protein msta, isoform B [Dinoponera quadriceps]	0.335464	-21.9848	2.96537	-7.41385	1.22684e-13	3.33362e-11
Contig133015	#N/A	0.305297	-21.967	2.96494	-7.40893	1.27325e-13	3.4399e-11
Contig81230	#N/A	0.403673	-21.9577	2.96495	-7.40575	1.30411e-13	3.50984e-11
Contig78431	ref|XP_011866471.1| PREDICTED: probable maleylacetoacetate isomerase 2 [Vollenhovia emeryi]	0.256287	-21.9329	2.96219	-7.40429	1.31856e-13	3.54199e-11
Contig78133	ref|XP_011173125.1| PREDICTED: uncharacterized protein LOC105205454 [Solenopsis invicta]	0.508062	-21.9309	2.95833	-7.41328	1.23218e-13	3.34171e-11
Contig102400	#N/A	0.170831	-21.9271	2.96657	-7.39139	1.45301e-13	3.88101e-11
Contig34985	#N/A	0.454388	-21.9179	2.9664	-7.3887	1.48271e-13	3.94544e-11
Contig63396	ref|XP_011159238.1| PREDICTED: arf-GAP with SH3 domain, ANK repeat and PH domain-containing protein 2 isoform X2 [Solenopsis invicta]	0.302084	-21.901	2.96409	-7.38879	1.4817e-13	3.94544e-11
Contig60361	#N/A	0.276414	-21.8998	2.96567	-7.38446	1.53076e-13	4.06564e-11
Contig65953	#N/A	0.259523	-21.8857	2.96551	-7.38006	1.58214e-13	4.19421e-11
Contig77002	ref|XP_011699507.1| PREDICTED: uncharacterized protein LOC105456864 [Wasmannia auropunctata]	0.34054	-21.8819	2.96546	-7.37892	1.59579e-13	4.22248e-11
Contig95478	#N/A	0.312609	-21.8759	2.96552	-7.37673	1.62224e-13	4.28445e-11
Contig68663	#N/A	0.294566	-21.857	2.9652	-7.37117	1.69134e-13	4.45861e-11
Contig118026	#N/A	0.321032	-21.8081	2.96114	-7.36474	1.77487e-13	4.67009e-11
Contig146303	#N/A	0.299078	-21.8041	2.96504	-7.35374	1.92737e-13	5.06194e-11
Contig54050	#N/A	0.267477	-21.8035	2.96584	-7.35153	1.95946e-13	5.13666e-11
Contig43974	#N/A	0.313625	-21.749	2.96515	-7.33488	2.21923e-13	5.80687e-11
Contig64517	#N/A	0.249089	-21.7381	2.96517	-7.33114	2.28199e-13	5.96005e-11
Contig147126	ref|XP_011054804.1| PREDICTED: multiple inositol polyphosphate phosphatase 1 [Acromyrmex echinatior]	0.522798	-21.7329	2.96732	-7.3241	2.40515e-13	6.27013e-11
Contig111071	ref|XP_011875469.1| PREDICTED: disintegrin and metalloproteinase domain-containing protein 22 isoform X6 [Vollenhovia emeryi]	0.255972	-21.6991	2.96351	-7.32209	2.44141e-13	6.35292e-11
Contig117057	ref|XP_011869259.1| PREDICTED: UNC93-like protein [Vollenhovia emeryi]	0.201551	-21.6955	2.96567	-7.31553	2.56359e-13	6.6586e-11
Contig51662	ref|XP_011068685.1| PREDICTED: uncharacterized protein LOC105154694 [Acromyrmex echinatior]	0.312449	-21.6775	2.96561	-7.30962	2.67898e-13	6.92015e-11
Contig72899	#N/A	0.312449	-21.6775	2.96561	-7.30962	2.67898e-13	6.92015e-11
Contig144262	#N/A	0.317169	-21.6558	2.9651	-7.30357	2.8024e-13	7.18639e-11
Contig129587	#N/A	0.307247	-21.6476	2.96594	-7.29873	2.90497e-13	7.43593e-11
Contig43058	#N/A	0.266996	-21.6389	2.96189	-7.30577	2.7569e-13	7.08909e-11
Contig131454	#N/A	0.188193	-21.513	2.96592	-7.25341	4.06398e-13	1.02058e-10
Contig67500	#N/A	0.275617	-21.5116	2.96576	-7.25333	4.06652e-13	1.02058e-10
Contig79275	#N/A	0.275617	-21.5116	2.96576	-7.25333	4.06652e-13	1.02058e-10
Contig81827	ref|XP_015378351.1| PREDICTED: uncharacterized protein LOC107172574 [Diuraphis noxia]	0.660347	-21.508	2.96502	-7.25391	4.04915e-13	1.02058e-10
Contig73393	#N/A	0.244426	-21.4535	2.96703	-7.23066	4.80665e-13	1.19152e-10
Contig122630	#N/A	0.199031	-21.4362	2.96589	-7.22756	4.9175e-13	1.21686e-10
Contig144485	ref|XP_011692346.1| PREDICTED: bifunctional glutamate/proline--tRNA ligase [Wasmannia auropunctata]	3.48425	-21.3985	2.97133	-7.20166	5.94831e-13	1.45663e-10
Contig36498	#N/A	0.329105	-21.3932	2.96533	-7.21443	5.41613e-13	1.33325e-10
Contig100847	ref|XP_012536476.1| PREDICTED: probable cytochrome P450 12a5, mitochondrial [Monomorium pharaonis]	0.471086	-21.3348	2.96519	-7.19509	6.24191e-13	1.52589e-10
Contig61345	ref|XP_012531676.1| PREDICTED: uncharacterized protein LOC105834031 [Monomorium pharaonis]	0.251903	-21.328	2.96905	-7.18344	6.79788e-13	1.65322e-10
Contig46541	#N/A	0.326948	-21.3267	2.96564	-7.19127	6.41924e-13	1.56653e-10
Contig140988	ref|XP_011646670.1| PREDICTED: mushroom body large-type Kenyon cell-specific protein 1-like [Pogonomyrmex barbatus]	0.423112	-21.3207	2.95887	-7.20569	5.77505e-13	1.41913e-10
Contig92247	#N/A	1.30363	-21.3106	2.96865	-7.17854	7.04608e-13	1.70478e-10
Contig60722	#N/A	0.240735	-21.3063	2.96675	-7.18169	6.88569e-13	1.66883e-10
Contig149524	ref|XP_011704520.1| PREDICTED: uncharacterized protein LOC105459876 [Wasmannia auropunctata]	3.05875	-21.2957	2.94829	-7.22307	5.08286e-13	1.25339e-10
Contig65647	#N/A	0.235847	-21.2822	2.96639	-7.17443	7.26106e-13	1.7506e-10
Contig82504	#N/A	0.385171	-21.237	2.96672	-7.15839	8.16274e-13	1.95156e-10
Contig95640	#N/A	0.278572	-21.2303	2.96468	-7.16106	8.00545e-13	1.92045e-10
Contig116652	#N/A	0.242834	-21.2157	2.96359	-7.15878	8.13976e-13	1.94936e-10
Contig126657	ref|XP_011862366.1| PREDICTED: flocculation protein FLO11-like [Vollenhovia emeryi]	1.2558	-21.2149	2.96865	-7.14633	8.9128e-13	2.1237e-10
Contig62533	#N/A	0.371632	-21.2067	2.96653	-7.14864	8.76403e-13	2.09177e-10
Contig61082	ref|XP_014473234.1| PREDICTED: uncharacterized protein LOC106743678, partial [Dinoponera quadriceps]	11.1574	-21.203	2.97132	-7.13589	9.61609e-13	2.27212e-10
Contig148852	#N/A	0.337981	-21.1913	2.96564	-7.14563	8.95862e-13	2.12847e-10
Contig115682	#N/A	0.29581	-21.173	2.96488	-7.14127	9.24753e-13	2.19236e-10
Contig91389	#N/A	0.303147	-21.1348	2.96067	-7.1385	9.43548e-13	2.23317e-10
Contig131749	#N/A	0.218618	-21.134	2.96572	-7.12608	1.03264e-12	2.42639e-10
Contig27928	ref|XP_011700767.1| PREDICTED: uncharacterized protein LOC105457668 [Wasmannia auropunctata]	0.192262	-21.0887	2.96658	-7.10876	1.17094e-12	2.73924e-10
Contig86792	#N/A	0.292149	-21.0847	2.96721	-7.10588	1.19557e-12	2.79223e-10
Contig120306	#N/A	0.253051	-21.0681	2.96567	-7.10399	1.21204e-12	2.82604e-10
Contig99660	ref|XP_011873949.1| PREDICTED: chymotrypsin-2-like [Vollenhovia emeryi]	6.03634	-21.0448	2.96871	-7.08886	1.35221e-12	3.13218e-10
Contig40158	ref|XP_011872163.1| PREDICTED: probable G-protein coupled receptor 158 [Vollenhovia emeryi]	1.01238	-21.0297	2.96874	-7.0837	1.40359e-12	3.23001e-10
Contig145225	#N/A	0.413649	-21.0167	2.96643	-7.08485	1.39199e-12	3.20855e-10
Contig115897	#N/A	0.219264	-20.9854	2.96575	-7.07591	1.48471e-12	3.38448e-10
Contig41727	ref|XP_011159588.1| PREDICTED: ATP-dependent DNA helicase 2 subunit 1-like [Solenopsis invicta]	11.5232	-20.9706	2.97132	-7.05768	1.693e-12	3.81525e-10
Contig52754	ref|XP_013190478.1| PREDICTED: retrovirus-related Pol polyprotein from transposon TNT 1-94 [Amyelois transitella]	0.206959	-20.9645	2.96935	-7.0603	1.6614e-12	3.75001e-10
Contig77715	#N/A	0.206959	-20.9645	2.96935	-7.0603	1.6614e-12	3.75001e-10
Contig48852	#N/A	0.22433	-20.96	2.96602	-7.06673	1.58631e-12	3.60936e-10
Contig80653	ref|XP_012147661.1| PREDICTED: WD repeat-containing protein 89 [Megachile rotundata]	0.230533	-20.9458	2.96582	-7.0624	1.63646e-12	3.71236e-10
Contig95634	#N/A	0.202619	-20.9452	2.96607	-7.0616	1.64591e-12	3.72696e-10
Contig117020	#N/A	0.179943	-20.9173	2.9696	-7.04381	1.87054e-12	4.15569e-10
Contig150241	#N/A	0.179943	-20.9173	2.9696	-7.04381	1.87054e-12	4.15569e-10
Contig109592	ref|XP_011686372.1| PREDICTED: intraflagellar transport protein 80 homolog [Wasmannia auropunctata]	0.222286	-20.907	2.96666	-7.04733	1.82378e-12	4.09039e-10
Contig78583	#N/A	0.251961	-20.8938	2.96584	-7.04483	1.85688e-12	4.13836e-10
Contig133859	#N/A	0.228706	-20.8778	2.96592	-7.03923	1.93304e-12	4.2677e-10
Contig37132	ref|XP_012223310.1| PREDICTED: SH3 and multiple ankyrin repeat domains protein 3 isoform X4 [Linepithema humile]	0.90169	-20.8748	2.96251	-7.04635	1.83678e-12	4.1102e-10
Contig50792	ref|XP_011066374.1| PREDICTED: multidrug resistance-associated protein 4-like [Acromyrmex echinatior]	0.317408	-20.8614	2.96342	-7.03963	1.92753e-12	4.2647e-10
Contig130780	#N/A	0.249151	-20.8308	2.9658	-7.02368	2.16099e-12	4.72666e-10
Contig138886	ref|XP_012531029.1| PREDICTED: uncharacterized protein LOC105833661 isoform X3 [Monomorium pharaonis]	1.42244	-20.8223	2.96865	-7.01408	2.3147e-12	5.01626e-10
Contig135283	#N/A	0.219573	-20.8213	2.96558	-7.021	2.2028e-12	4.80323e-10
Contig47825	#N/A	0.202734	-20.8198	2.96654	-7.01821	2.24735e-12	4.87779e-10
Contig122598	#N/A	0.238623	-20.7905	2.96586	-7.00994	2.38417e-12	5.1589e-10
Contig46599	#N/A	0.249458	-20.7687	2.96459	-7.00558	2.45964e-12	5.31406e-10
Contig95252	ref|XP_011869392.1| PREDICTED: soluble guanylate cyclase 88E isoform X2 [Vollenhovia emeryi]	0.410664	-20.7525	2.96748	-6.99332	2.6846e-12	5.75609e-10
Contig145287	ref|XP_011868100.1| PREDICTED: uncharacterized protein LOC105562140 isoform X2 [Vollenhovia emeryi]	0.252033	-20.7418	2.96702	-6.99078	2.73355e-12	5.85215e-10
Contig133412	ref|XP_011685087.1| PREDICTED: uncharacterized protein YJR142W [Wasmannia auropunctata]	1.22251	-20.7284	2.9687	-6.98232	2.90338e-12	6.18762e-10
Contig51624	ref|XP_011875497.1| PREDICTED: PC4 and SFRS1-interacting protein [Vollenhovia emeryi]	0.306016	-20.7195	2.96589	-6.98592	2.83e-12	6.04035e-10
Contig139619	#N/A	0.209176	-20.7001	2.96598	-6.97916	2.96948e-12	6.29998e-10
Contig84362	#N/A	0.248296	-20.6924	2.96548	-6.97778	2.99885e-12	6.34324e-10
Contig98837	#N/A	0.862296	-20.6882	2.96869	-6.96879	3.1967e-12	6.72148e-10
Contig93182	ref|XP_011629804.1| PREDICTED: LOW QUALITY PROTEIN: glutamate--cysteine ligase catalytic subunit [Pogonomyrmex barbatus]	0.260949	-20.688	2.96584	-6.97542	3.0496e-12	6.44094e-10
Contig68656	#N/A	0.201952	-20.6802	2.96625	-6.97183	3.12847e-12	6.58782e-10
Contig90275	#N/A	0.201952	-20.6802	2.96625	-6.97183	3.12847e-12	6.58782e-10
Contig113080	ref|XP_012055059.1| PREDICTED: serine protease nudel [Atta cephalotes]	1.18687	-20.6784	2.96862	-6.96567	3.26836e-12	6.86196e-10
Contig83145	#N/A	0.92932	-20.6582	2.96863	-6.95882	3.43124e-12	7.16136e-10
Contig68786	ref|XP_014467573.1| PREDICTED: uncharacterized protein LOC106740753 isoform X1 [Dinoponera quadriceps]	0.271667	-20.6486	2.96671	-6.96009	3.4005e-12	7.10769e-10
Contig149197	#N/A	0.215804	-20.6172	2.9657	-6.95188	3.60458e-12	7.45704e-10
Contig128673	#N/A	0.141053	-20.617	2.96743	-6.94775	3.71163e-12	7.61165e-10
Contig89796	#N/A	0.141053	-20.617	2.96743	-6.94775	3.71163e-12	7.61165e-10
Contig44463	ref|XP_011302448.1| PREDICTED: lysine--tRNA ligase isoform X2 [Fopius arisanus]	0.304608	-20.6078	2.96596	-6.94809	3.70253e-12	7.61165e-10
Contig131207	#N/A	0.416563	-20.5903	2.96441	-6.94585	3.76186e-12	7.69566e-10
Contig74986	#N/A	0.196027	-20.5798	2.96654	-6.93733	3.99572e-12	8.13521e-10
Contig45291	#N/A	0.225133	-20.5532	2.96583	-6.93001	4.20818e-12	8.53089e-10
Contig12098	#N/A	0.717966	-20.5446	2.96868	-6.92046	4.50194e-12	9.08729e-10
Contig72829	ref|XP_012531225.1| PREDICTED: protein claret segregational [Monomorium pharaonis]	0.639985	-20.5367	2.96871	-6.91772	4.5898e-12	9.21201e-10
Contig99937	ref|XP_017033456.1| PREDICTED: calmodulin isoform X2 [Drosophila kikkawai]	0.245257	-20.5013	2.96595	-6.91221	4.77162e-12	9.54979e-10
Contig101653	#N/A	0.203766	-20.5007	2.96628	-6.91123	4.80474e-12	9.60248e-10
Contig143045	#N/A	0.231328	-20.4486	2.96586	-6.89467	5.39882e-12	1.0714e-09
Contig84897	#N/A	0.287365	-20.4459	2.96928	-6.8858	5.74636e-12	1.13559e-09
Contig72091	#N/A	0.442707	-20.4374	2.969	-6.8836	5.83606e-12	1.15009e-09
Contig88340	#N/A	0.19384	-20.4185	2.96655	-6.88291	5.86436e-12	1.15086e-09
Contig94342	#N/A	0.19384	-20.4185	2.96655	-6.88291	5.86436e-12	1.15086e-09
Contig99198	#N/A	0.19384	-20.4185	2.96655	-6.88291	5.86436e-12	1.15086e-09
Contig69352	#N/A	0.236612	-20.4159	2.96722	-6.8805	5.96443e-12	1.16887e-09
Contig70405	#N/A	0.215801	-20.4025	2.96655	-6.87751	6.09071e-12	1.19197e-09
Contig148089	#N/A	0.248734	-20.3997	2.96684	-6.87588	6.1607e-12	1.204e-09
Contig101881	ref|XP_014488017.1| PREDICTED: uncharacterized protein LOC106751597 [Dinoponera quadriceps]	0.227291	-20.3977	2.96947	-6.86913	6.45953e-12	1.25891e-09
Contig22407	#N/A	21.2751	-20.3858	2.96857	-6.86722	6.54632e-12	1.27232e-09
Contig53565	#N/A	0.203633	-20.3735	2.96642	-6.86806	6.5082e-12	1.26665e-09
Contig129271	ref|XP_014478543.1| PREDICTED: uncharacterized protein LOC106746451 [Dinoponera quadriceps]	0.226902	-20.3652	2.96928	-6.85864	6.95173e-12	1.34372e-09
Contig101026	#N/A	0.212803	-20.3621	2.96607	-6.86503	6.64795e-12	1.28892e-09
Contig46834	#N/A	0.219825	-20.3323	2.96655	-6.85386	7.18856e-12	1.38477e-09
Contig45923	#N/A	0.183536	-20.3309	2.96647	-6.85356	7.20331e-12	1.38477e-09
Contig65931	#N/A	0.183536	-20.3309	2.96647	-6.85356	7.20331e-12	1.38477e-09
Contig146378	#N/A	0.191935	-20.3241	2.96709	-6.84983	7.39367e-12	1.41367e-09
Contig41805	ref|XP_012528572.1| PREDICTED: BTB/POZ domain-containing protein 3-like [Monomorium pharaonis]	4.6227	-20.324	2.97133	-6.84002	7.91819e-12	1.50581e-09
Contig70614	#N/A	0.910898	-20.2973	2.96878	-6.8369	8.09261e-12	1.53691e-09
Contig52109	#N/A	0.229997	-20.2931	2.96673	-6.84022	7.90704e-12	1.50572e-09
Contig50435	#N/A	0.245494	-20.2922	2.96597	-6.8417	7.82615e-12	1.49232e-09
Contig124109	#N/A	0.199543	-20.2835	2.96935	-6.83095	8.43544e-12	1.59345e-09
Contig89307	ref|XP_011067932.1| PREDICTED: nuclear pore complex protein DDB_G0274915 homolog [Acromyrmex echinatior]	0.256622	-20.2707	2.96618	-6.83394	8.26131e-12	1.56474e-09
Contig145744	#N/A	0.189297	-20.2494	2.96622	-6.82665	8.69205e-12	1.63755e-09
Contig100051	#N/A	0.179208	-20.248	2.96681	-6.82483	8.80286e-12	1.65182e-09
Contig105469	#N/A	0.179208	-20.248	2.96681	-6.82483	8.80286e-12	1.65182e-09
Contig70545	ref|XP_015122715.1| PREDICTED: uncharacterized protein K02A2.6-like [Diachasma alloeum]	0.200644	-20.2459	2.96634	-6.82522	8.77937e-12	1.6518e-09
Contig71524	ref|XP_011684583.1| PREDICTED: cathepsin O-like [Wasmannia auropunctata]	0.839501	-20.2078	2.96872	-6.80692	9.97131e-12	1.86859e-09
Contig133872	#N/A	0.189788	-20.1546	2.96656	-6.79394	1.09114e-11	2.02862e-09
Contig40838	ref|XP_011305768.1| PREDICTED: uncharacterized protein LOC105268154 [Fopius arisanus]	0.225237	-20.152	2.96656	-6.79306	1.09782e-11	2.03568e-09
Contig61357	#N/A	0.225237	-20.152	2.96656	-6.79306	1.09782e-11	2.03568e-09
Contig60532	#N/A	0.215738	-20.1319	2.96947	-6.7796	1.20506e-11	2.2142e-09
Contig67266	#N/A	0.215738	-20.1319	2.96947	-6.7796	1.20506e-11	2.2142e-09
Contig86871	#N/A	0.536131	-20.1273	2.96871	-6.7798	1.2034e-11	2.2142e-09
Contig81583	#N/A	0.207351	-20.1242	2.96628	-6.78431	1.16644e-11	2.15444e-09
Contig137388	ref|XP_011871962.1| PREDICTED: protein Mpv17 isoform X2 [Vollenhovia emeryi]	0.239996	-20.1089	2.96566	-6.78057	1.19707e-11	2.20812e-09
Contig66421	ref|XP_011866458.1| PREDICTED: uncharacterized protein LOC105561260 isoform X1 [Vollenhovia emeryi]	1.0835	-20.1038	2.96866	-6.77199	1.27023e-11	2.3309e-09
Contig44448	#N/A	0.230524	-20.0887	2.96911	-6.76589	1.32489e-11	2.4249e-09
Contig81161	#N/A	0.230524	-20.0887	2.96911	-6.76589	1.32489e-11	2.4249e-09
Contig59431	ref|XP_008551277.1| PREDICTED: phosphate carrier protein, mitochondrial [Microplitis demolitor]	0.467747	-20.059	2.969	-6.75613	1.41725e-11	2.58058e-09
Contig52566	#N/A	0.243958	-20.0229	2.96714	-6.74821	1.49684e-11	2.71153e-09
Contig137307	ref|XP_012522436.1| PREDICTED: glycerol-3-phosphate dehydrogenase [NAD(+)], cytoplasmic-like isoform X2 [Monomorium pharaonis]	0.623982	-20.0169	2.96879	-6.74243	1.55756e-11	2.8143e-09
Contig65259	#N/A	0.248941	-19.9338	2.96904	-6.71388	1.8952e-11	3.40262e-09
Contig33231	ref|XP_011858518.1| PREDICTED: uncharacterized protein LOC105556060 [Vollenhovia emeryi]	0.165119	-19.906	2.96679	-6.70961	1.9515e-11	3.48598e-09
Contig54020	ref|XP_011053630.1| PREDICTED: CBL-interacting protein kinase 16-like isoform X1 [Acromyrmex echinatior]	0.165119	-19.906	2.96679	-6.70961	1.9515e-11	3.48598e-09
Contig63287	#N/A	0.165119	-19.906	2.96679	-6.70961	1.9515e-11	3.48598e-09
Contig77326	ref|XP_011168055.1| PREDICTED: uncharacterized protein LOC105201654 [Solenopsis invicta]	0.165119	-19.906	2.96679	-6.70961	1.9515e-11	3.48598e-09
Contig58374	ref|XP_011861491.1| PREDICTED: UDP-galactose translocator isoform X2 [Vollenhovia emeryi]	0.584535	-19.9033	2.96887	-6.70401	2.02775e-11	3.61305e-09
Contig48811	#N/A	0.456107	-19.8569	2.96905	-6.68798	2.2627e-11	4.01649e-09
Contig93865	#N/A	0.468258	-19.8435	2.96891	-6.68378	2.32858e-11	4.11791e-09
Contig133443	#N/A	0.251788	-19.8406	2.96649	-6.68823	2.25883e-11	4.01466e-09
Contig21784	#N/A	0.280952	-19.8372	2.96343	-6.694	2.17158e-11	3.86446e-09
Contig110386	ref|XP_011700362.1| PREDICTED: glutamate receptor ionotropic, delta-1-like [Wasmannia auropunctata]	0.642241	-19.818	2.96887	-6.67529	2.46741e-11	4.35797e-09
Contig91650	ref|XP_012058883.1| PREDICTED: alpha-protein kinase 1 [Atta cephalotes]	0.331692	-19.8123	2.96903	-6.67299	2.50651e-11	4.42151e-09
Contig13702	ref|XP_012538239.1| PREDICTED: UPF0160 protein MYG1, mitochondrial isoform X3 [Monomorium pharaonis]	21.6751	-19.8083	2.96861	-6.67256	2.51372e-11	4.42869e-09
Contig104617	#N/A	0.503686	-19.801	2.96875	-6.66981	2.56133e-11	4.50614e-09
Contig63746	ref|XP_011173991.1| PREDICTED: uncharacterized protein LOC105206174, partial [Solenopsis invicta]	5.05915	-19.7997	2.96875	-6.66936	2.5692e-11	4.50614e-09
Contig109553	ref|XP_011687687.1| PREDICTED: protein farnesyltransferase/geranylgeranyltransferase type-1 subunit alpha [Wasmannia auropunctata]	0.860046	-19.7863	2.9687	-6.66497	2.64718e-11	4.63493e-09
Contig89295	ref|XP_011873803.1| PREDICTED: uncharacterized protein LOC105565322 [Vollenhovia emeryi]	0.560882	-19.752	2.96905	-6.65263	2.87901e-11	5.02838e-09
Contig30973	ref|XP_011881115.1| PREDICTED: sarcoplasmic calcium-binding protein 1 [Vollenhovia emeryi]	0.182993	-19.7364	2.96713	-6.65169	2.89753e-11	5.04824e-09
Contig60641	#N/A	0.182993	-19.7364	2.96713	-6.65169	2.89753e-11	5.04824e-09
Contig115217	#N/A	0.210368	-19.7298	2.96625	-6.65144	2.90232e-11	5.05036e-09
Contig123518	#N/A	0.167205	-19.7166	2.96744	-6.64432	3.0462e-11	5.26829e-09
Contig150205	#N/A	1.74251	-19.7137	2.96873	-6.64045	3.12735e-11	5.40201e-09
Contig99958	#N/A	0.334609	-19.7051	2.96437	-6.64732	2.98477e-11	5.18108e-09
Contig49574	#N/A	0.454488	-19.688	2.96885	-6.63154	3.32205e-11	5.71736e-09
Contig104257	#N/A	0.159329	-19.6747	2.96709	-6.63097	3.33496e-11	5.71869e-09
Contig131179	#N/A	0.159329	-19.6747	2.96709	-6.63097	3.33496e-11	5.71869e-09
Contig19935	#N/A	0.159329	-19.6747	2.96709	-6.63097	3.33496e-11	5.71869e-09
Contig57893	ref|XP_011871377.1| PREDICTED: protein SHQ1 homolog isoform X3 [Vollenhovia emeryi]	0.22217	-19.6732	2.96625	-6.63235	3.30388e-11	5.69303e-09
Contig140512	ref|XP_011695770.1| PREDICTED: serine/threonine-protein kinase ICK isoform X3 [Wasmannia auropunctata]	0.634694	-19.6712	2.96883	-6.62591	3.45116e-11	5.89587e-09
Contig142999	#N/A	0.207253	-19.6572	2.96679	-6.62575	3.45498e-11	5.89587e-09
Contig70441	#N/A	0.164508	-19.6537	2.9668	-6.62453	3.48344e-11	5.93727e-09
Contig54230	ref|XP_011865391.1| PREDICTED: uncharacterized protein KIAA0556-like isoform X1 [Vollenhovia emeryi]	2.54114	-19.6458	2.9481	-6.6639	2.66654e-11	4.66305e-09
Contig95874	ref|XP_013090993.1| PREDICTED: dolichyl-diphosphooligosaccharide--protein glycosyltransferase subunit 2-like [Biomphalaria glabrata]	0.590513	-19.6407	2.96887	-6.61555	3.7017e-11	6.27898e-09
Contig141603	#N/A	0.296963	-19.6398	2.9652	-6.62344	3.5093e-11	5.97413e-09
Contig88629	#N/A	0.217832	-19.6275	2.9662	-6.61704	3.6645e-11	6.22335e-09
Contig90450	#N/A	0.512723	-19.6223	2.96912	-6.60878	3.87488e-11	6.54915e-09
Contig57146	#N/A	0.816713	-19.5991	2.96882	-6.60166	4.06589e-11	6.85559e-09
Contig72391	#N/A	0.303054	-19.5766	2.96915	-6.59334	4.30039e-11	7.21654e-09
Contig85323	#N/A	0.509294	-19.5619	2.96894	-6.58887	4.432e-11	7.41976e-09
Contig120890	#N/A	0.201659	-19.5608	2.96604	-6.59491	4.25505e-11	7.14894e-09
Contig117006	#N/A	0.163013	-19.5584	2.9671	-6.59175	4.34669e-11	7.28558e-09
Contig148946	ref|XP_011170481.1| PREDICTED: general transcription factor IIH subunit 1-like, partial [Solenopsis invicta]	1.39261	-19.5502	2.95693	-6.61165	3.80053e-11	6.43119e-09
Contig142105	#N/A	0.232258	-19.5285	2.96928	-6.57685	4.80507e-11	8.03481e-09
Contig114180	ref|XP_012061652.1| PREDICTED: uncharacterized protein LOC105624920 [Atta cephalotes]	1.24652	-19.5244	2.96877	-6.57659	4.81368e-11	8.03969e-09
Contig86719	#N/A	0.18762	-19.4837	2.96935	-6.5616	5.3233e-11	8.8179e-09
Contig107559	ref|XP_012150849.1| PREDICTED: uncharacterized protein LOC100882311 [Megachile rotundata]	0.168192	-19.4828	2.96659	-6.5674	5.12027e-11	8.54167e-09
Contig70521	#N/A	0.175589	-19.4707	2.96686	-6.56273	5.28323e-11	8.78241e-09
Contig81627	ref|XP_011056669.1| PREDICTED: protein krueppel-like isoform X2 [Acromyrmex echinatior]	0.175589	-19.4707	2.96686	-6.56273	5.28323e-11	8.78241e-09
Contig149231	#N/A	0.16159	-19.4655	2.96712	-6.56042	5.36566e-11	8.87484e-09
Contig33743	#N/A	0.491029	-19.4587	2.969	-6.55394	5.60383e-11	9.23926e-09
Contig93636	#N/A	0.219541	-19.4581	2.96604	-6.56029	5.37024e-11	8.87484e-09
Contig27608	#N/A	0.154111	-19.4555	2.96768	-6.55581	5.53417e-11	9.13506e-09
Contig46103	#N/A	0.188293	-19.4277	2.96656	-6.54887	5.79724e-11	9.53589e-09
Contig114733	#N/A	0.173535	-19.4261	2.96669	-6.5481	5.82753e-11	9.57457e-09
Contig117061	#N/A	0.143239	-19.4217	2.96878	-6.54199	6.07048e-11	9.89778e-09
Contig125160	ref|XP_011692182.1| PREDICTED: uncharacterized protein LOC105452605 isoform X1 [Wasmannia auropunctata]	0.145282	-19.4173	2.96813	-6.54192	6.07329e-11	9.89778e-09
Contig127620	#N/A	0.145282	-19.4173	2.96813	-6.54192	6.07329e-11	9.89778e-09
Contig135270	#N/A	0.145282	-19.4173	2.96813	-6.54192	6.07329e-11	9.89778e-09
Contig116212	#N/A	0.141143	-19.363	2.96837	-6.5231	6.88706e-11	1.11214e-08
Contig131365	ref|XP_011630184.1| PREDICTED: basement membrane-specific heparan sulfate proteoglycan core protein-like isoform X1 [Pogonomyrmex barbatus]	0.141143	-19.363	2.96837	-6.5231	6.88706e-11	1.11214e-08
Contig143900	#N/A	0.141143	-19.363	2.96837	-6.5231	6.88706e-11	1.11214e-08
Contig149184	#N/A	0.141143	-19.363	2.96837	-6.5231	6.88706e-11	1.11214e-08
Contig25296	#N/A	0.141143	-19.363	2.96837	-6.5231	6.88706e-11	1.11214e-08
Contig141576	ref|XP_012054768.1| PREDICTED: methionyl-tRNA formyltransferase, mitochondrial [Atta cephalotes]	0.528311	-19.3506	2.96894	-6.5177	7.1395e-11	1.15027e-08
Contig83127	ref|XP_011696169.1| PREDICTED: leukotriene A-4 hydrolase [Wasmannia auropunctata]	0.816361	-19.3356	2.96869	-6.51317	7.35801e-11	1.18413e-08
Contig90142	ref|XP_011878257.1| PREDICTED: A-kinase anchor protein 10, mitochondrial [Vollenhovia emeryi]	0.182574	-19.3335	2.96622	-6.5179	7.12987e-11	1.15003e-08
Contig99209	ref|XP_005102325.1| PREDICTED: probable pyruvate dehydrogenase E1 component subunit alpha, mitochondrial [Aplysia californica]	0.445259	-19.3293	2.96904	-6.51029	7.50057e-11	1.20433e-08
Contig81732	#N/A	0.506378	-19.3264	2.96898	-6.50944	7.54294e-11	1.20976e-08
Contig95744	#N/A	0.221283	-19.3246	2.96755	-6.51198	7.41672e-11	1.19222e-08
Contig52956	ref|XP_011689525.1| PREDICTED: uncharacterized protein LOC105451031 [Wasmannia auropunctata]	0.173347	-19.3067	2.96677	-6.50765	7.63373e-11	1.22016e-08
Contig90474	ref|XP_011705250.1| PREDICTED: putative odorant receptor 71a, partial [Wasmannia auropunctata]	0.173347	-19.3067	2.96677	-6.50765	7.63373e-11	1.22016e-08
Contig91471	#N/A	0.173347	-19.3067	2.96677	-6.50765	7.63373e-11	1.22016e-08
Contig62427	ref|XP_013297029.1| hypothetical protein NECAME_03935 [Necator americanus]	0.353721	-19.301	2.96916	-6.50051	8.00503e-11	1.27375e-08
Contig42329	ref|XP_011874259.1| PREDICTED: uncharacterized protein LOC105565567 [Vollenhovia emeryi]	28.2701	-19.2939	2.9451	-6.5512	5.70754e-11	9.39928e-09
Contig70393	#N/A	0.241379	-19.2885	2.96576	-6.50372	7.83577e-11	1.25104e-08
Contig125303	#N/A	0.189315	-19.2841	2.96644	-6.50077	7.99112e-11	1.27297e-08
Contig139727	ref|XP_011701218.1| PREDICTED: integrin alpha-3-like [Wasmannia auropunctata]	0.257085	-19.277	2.96635	-6.49856	8.10903e-11	1.28884e-08
Contig54090	#N/A	0.286549	-19.2693	2.96913	-6.48987	8.59132e-11	1.36243e-08
Contig86026	ref|XP_014239868.1| PREDICTED: non-lysosomal glucosylceramidase isoform X3 [Cimex lectularius]	0.470929	-19.2683	2.96895	-6.48991	8.5885e-11	1.36243e-08
Contig119154	#N/A	0.551733	-19.2604	2.96887	-6.48745	8.73038e-11	1.3815e-08
Contig97862	ref|XP_012540636.1| PREDICTED: uncharacterized protein LOC105839115, partial [Monomorium pharaonis]	0.610728	-19.2552	2.96885	-6.48574	8.82993e-11	1.39557e-08
Contig90881	#N/A	0.358303	-19.2478	2.96911	-6.48269	9.01035e-11	1.42091e-08
Contig105827	ref|XP_011874752.1| PREDICTED: DDB1- and CUL4-associated factor 11 [Vollenhovia emeryi]	0.515073	-19.2363	2.96881	-6.47948	9.20371e-11	1.44978e-08
Contig50640	#N/A	0.34208	-19.2353	2.96923	-6.47822	9.28104e-11	1.45871e-08
Contig94080	ref|XP_011060325.1| PREDICTED: uncharacterized protein LOC105149537 [Acromyrmex echinatior]	0.34208	-19.2353	2.96923	-6.47822	9.28104e-11	1.45871e-08
Contig80616	#N/A	0.460609	-19.2223	2.969	-6.47434	9.52247e-11	1.49334e-08
Contig74060	#N/A	0.411424	-19.2196	2.96882	-6.47382	9.5554e-11	1.49684e-08
Contig65805	#N/A	0.146703	-19.208	2.96729	-6.47326	9.59108e-11	1.4991e-08
Contig76575	#N/A	0.146703	-19.208	2.96729	-6.47326	9.59108e-11	1.4991e-08
Contig141530	#N/A	0.231222	-19.2074	2.96549	-6.47697	9.35798e-11	1.46917e-08
Contig56609	#N/A	0.42516	-19.1949	2.969	-6.4651	1.01232e-10	1.56839e-08
Contig61425	ref|XP_015116717.1| PREDICTED: UDP-glucose 4-epimerase isoform X4 [Diachasma alloeum]	0.42516	-19.1949	2.969	-6.4651	1.01232e-10	1.56839e-08
Contig32075	ref|XP_011169190.1| PREDICTED: uncharacterized protein KIAA0195 isoform X5 [Solenopsis invicta]	0.494198	-19.1945	2.96883	-6.46533	1.01079e-10	1.56839e-08
Contig44853	#N/A	0.488654	-19.1817	2.96895	-6.46078	1.04168e-10	1.60814e-08
Contig61774	ref|XP_011169847.1| PREDICTED: uncharacterized protein LOC105202860 [Solenopsis invicta]	0.212108	-19.1452	2.96923	-6.44788	1.13429e-10	1.74779e-08
Contig53845	#N/A	0.785478	-19.1434	2.95085	-6.48743	8.73108e-11	1.3815e-08
Contig95493	ref|XP_012542162.1| PREDICTED: transcription elongation factor SPT4 [Monomorium pharaonis]	0.210118	-19.1082	2.96952	-6.43479	1.23642e-10	1.88386e-08
Contig44024	ref|XP_013403613.1| PREDICTED: putative ascorbate peroxidase [Lingula anatina]	0.365361	-19.1056	2.96916	-6.43469	1.23727e-10	1.88386e-08
Contig63495	#N/A	0.365361	-19.1056	2.96916	-6.43469	1.23727e-10	1.88386e-08
Contig90369	ref|XP_013418534.1| PREDICTED: ankyrin repeat and MYND domain-containing protein 1-like [Lingula anatina]	0.365361	-19.1056	2.96916	-6.43469	1.23727e-10	1.88386e-08
Contig134196	#N/A	0.146404	-19.0998	2.96785	-6.43555	1.23031e-10	1.88137e-08
Contig103312	ref|XP_011050668.1| PREDICTED: UPF0160 protein MYG1, mitochondrial [Acromyrmex echinatior]	10.5687	-19.0877	2.96871	-6.42964	1.27908e-10	1.94333e-08
Contig128237	#N/A	0.186806	-19.0762	2.96952	-6.424	1.32741e-10	2.01244e-08
Contig80638	#N/A	0.186806	-19.0762	2.96952	-6.424	1.32741e-10	2.01244e-08
Contig93435	#N/A	0.442123	-19.0451	2.969	-6.41463	1.41164e-10	2.13785e-08
Contig70408	#N/A	0.658594	-19.0377	2.969	-6.41217	1.43466e-10	2.17037e-08
Contig23734	ref|XP_011171881.1| PREDICTED: uncharacterized protein LOC105204491, partial [Solenopsis invicta]	1.09197	-19.0261	2.96867	-6.40897	1.46509e-10	2.21167e-08
Contig37617	ref|XP_014207744.1| PREDICTED: signal recognition particle receptor subunit alpha homolog isoform X2 [Copidosoma floridanum]	0.376209	-19.0251	2.9692	-6.40749	1.47938e-10	2.23086e-08
Contig88386	#N/A	0.421946	-18.9516	2.96893	-6.38332	1.73294e-10	2.60212e-08
Contig46940	ref|XP_002741821.1| PREDICTED: 60S ribosomal protein L11-like [Saccoglossus kowalevskii]	0.149269	-18.9462	2.96686	-6.38593	1.70361e-10	2.56079e-08
Contig46516	ref|XP_011555271.1| PREDICTED: protein krasavietz [Plutella xylostella]	0.552148	-18.9426	2.96895	-6.38022	1.76838e-10	2.6497e-08
Contig14242	ref|XP_011878433.1| PREDICTED: uncharacterized protein LOC105567836 [Vollenhovia emeryi]	0.206281	-18.9361	2.96679	-6.38268	1.74015e-10	2.61017e-08
Contig38203	#N/A	0.307951	-18.9302	2.96928	-6.37534	1.82561e-10	2.7239e-08
Contig123696	ref|XP_011165431.1| PREDICTED: putative fatty acyl-CoA reductase CG5065 [Solenopsis invicta]	0.313785	-18.923	2.96909	-6.37334	1.84953e-10	2.75667e-08
Contig34273	ref|XP_012523787.1| PREDICTED: ATP-binding cassette sub-family G member 4 [Monomorium pharaonis]	4.53959	-18.9093	2.55524	-7.40021	1.3597e-13	3.63867e-11
Contig45119	#N/A	0.442885	-18.9054	2.96899	-6.36763	1.91966e-10	2.8582e-08
Contig36260	#N/A	0.331233	-18.884	2.96928	-6.35979	2.02033e-10	2.99231e-08
Contig46511	ref|XP_003729176.1| PREDICTED: AP-1 complex subunit sigma-2 isoform X3 [Strongylocentrotus purpuratus]	0.331233	-18.884	2.96928	-6.35979	2.02033e-10	2.99231e-08
Contig81403	#N/A	0.331233	-18.884	2.96928	-6.35979	2.02033e-10	2.99231e-08
Contig98256	#N/A	9.56579	-18.8816	2.97132	-6.35461	2.08959e-10	3.07554e-08
Contig144568	ref|XP_011174651.1| PREDICTED: uncharacterized protein LOC105206894, partial [Solenopsis invicta]	0.437185	-18.8808	2.96894	-6.35943	2.02501e-10	2.9961e-08
Contig95832	#N/A	0.560079	-18.8787	2.96913	-6.35834	2.03951e-10	3.01125e-08
Contig112806	#N/A	0.251681	-18.8707	2.96911	-6.35568	2.07507e-10	3.05736e-08
Contig43008	ref|XP_009020682.1| hypothetical protein HELRODRAFT_112831 [Helobdella robusta]	0.41484	-18.8421	2.96904	-6.34621	2.20678e-10	3.24129e-08
Contig25361	ref|XP_011865369.1| PREDICTED: 1-phosphatidylinositol 4,5-bisphosphate phosphodiesterase gamma-1 isoform X2 [Vollenhovia emeryi]	0.522712	-18.8323	2.96937	-6.34219	2.2652e-10	3.31675e-08
Contig113397	#N/A	0.454274	-18.8195	2.96879	-6.3391	2.31107e-10	3.3804e-08
Contig98639	ref|XP_011163744.1| PREDICTED: DDB1- and CUL4-associated factor 5 [Solenopsis invicta]	0.292193	-18.8027	2.96907	-6.33287	2.40648e-10	3.50545e-08
Contig133537	ref|XP_011167444.1| PREDICTED: translation initiation factor IF-2, mitochondrial isoform X2 [Solenopsis invicta]	0.428758	-18.8027	2.96887	-6.33331	2.39964e-10	3.49909e-08
Contig71231	ref|XP_011647140.1| PREDICTED: venom metalloproteinase 3 isoform X3 [Pogonomyrmex barbatus]	1.08467	-18.7985	2.96107	-6.34855	2.17356e-10	3.19582e-08
Contig42464	#N/A	0.215624	-18.7945	2.96952	-6.32915	2.46508e-10	3.57973e-08
Contig116509	#N/A	0.195781	-18.7571	2.96601	-6.32403	2.54833e-10	3.68926e-08
Contig58408	ref|XP_011872993.1| PREDICTED: uncharacterized protein LOC105564867 [Vollenhovia emeryi]	0.359956	-18.7382	2.969	-6.31126	2.76766e-10	3.99042e-08
Contig26978	ref|XP_015438108.1| PREDICTED: uncharacterized protein LOC107193217, partial [Dufourea novaeangliae]	7.14067	-18.7353	2.9436	-6.36475	1.95614e-10	2.90944e-08
Contig85478	ref|XP_012055737.1| PREDICTED: trithorax group protein osa [Atta cephalotes]	0.170014	-18.7226	2.96743	-6.30937	2.80173e-10	4.03132e-08
Contig90558	ref|XP_015757155.1| PREDICTED: uncharacterized protein LOC107336602 isoform X1 [Acropora digitifera]	0.170014	-18.7226	2.96743	-6.30937	2.80173e-10	4.03132e-08
Contig68957	ref|XP_011696169.1| PREDICTED: leukotriene A-4 hydrolase [Wasmannia auropunctata]	0.398686	-18.7118	2.96904	-6.30231	2.93234e-10	4.20641e-08
Contig36268	#N/A	0.223075	-18.7116	2.96584	-6.30904	2.80773e-10	4.03584e-08
Contig74676	ref|XP_012535252.1| PREDICTED: AP-3 complex subunit beta-1 [Monomorium pharaonis]	0.945644	-18.7037	2.9517	-6.33658	2.34925e-10	3.4327e-08
Contig62363	#N/A	0.319592	-18.6948	2.96923	-6.29619	3.05047e-10	4.35817e-08
Contig102074	ref|XP_011647903.1| PREDICTED: sterile alpha and TIR motif-containing protein 1 isoform X2 [Pogonomyrmex barbatus]	0.361016	-18.6522	2.969	-6.28232	3.33563e-10	4.75115e-08
Contig44282	ref|XP_011704430.1| PREDICTED: cytochrome P450 6B7-like isoform X2 [Wasmannia auropunctata]	0.16902	-18.6421	2.96754	-6.28199	3.34268e-10	4.7564e-08
Contig134062	ref|XP_012236297.1| PREDICTED: guanylate cyclase 32E [Bombus impatiens]	0.977645	-18.6398	2.96096	-6.29518	3.07043e-10	4.38225e-08
Contig87885	ref|XP_011877260.1| PREDICTED: LOW QUALITY PROTEIN: uncharacterized aarF domain-containing protein kinase 5 [Vollenhovia emeryi]	0.388423	-18.5933	2.96896	-6.26257	3.78684e-10	5.36679e-08
Contig140098	ref|XP_011863749.1| PREDICTED: THUMP domain-containing protein 3-like [Vollenhovia emeryi]	0.431312	-18.573	2.96883	-6.256	3.94968e-10	5.59197e-08
Contig128002	ref|XP_011873942.1| PREDICTED: chymotrypsin-1-like [Vollenhovia emeryi]	8.8451	-18.5667	2.96994	-6.25154	4.0643e-10	5.74273e-08
Contig34005	#N/A	0.366957	-18.5358	2.969	-6.24311	4.28946e-10	6.04878e-08
Contig38559	#N/A	0.285463	-18.5273	2.96935	-6.23951	4.38954e-10	6.1653e-08
Contig45267	ref|XP_012524409.1| PREDICTED: arginine decarboxylase-like, partial [Monomorium pharaonis]	0.285463	-18.5273	2.96935	-6.23951	4.38954e-10	6.1653e-08
Contig75988	#N/A	0.285463	-18.5273	2.96935	-6.23951	4.38954e-10	6.1653e-08
Contig79261	#N/A	0.285463	-18.5273	2.96935	-6.23951	4.38954e-10	6.1653e-08
Contig29953	ref|XP_013190478.1| PREDICTED: retrovirus-related Pol polyprotein from transposon TNT 1-94 [Amyelois transitella]	0.516412	-18.5104	2.96895	-6.23464	4.52812e-10	6.34732e-08
Contig59978	ref|XP_011704616.1| PREDICTED: structural maintenance of chromosomes protein 1A-like [Wasmannia auropunctata]	0.438533	-18.4794	2.9688	-6.22453	4.83011e-10	6.75723e-08
Contig124176	ref|XP_011066301.1| PREDICTED: LOW QUALITY PROTEIN: protein real-time [Acromyrmex echinatior]	0.505731	-18.4791	2.96883	-6.22436	4.8353e-10	6.7578e-08
Contig12237	ref|XP_011858447.1| PREDICTED: uncharacterized protein LOC105556001, partial [Vollenhovia emeryi]	0.26605	-18.4744	2.96911	-6.22221	4.90192e-10	6.82978e-08
Contig80142	#N/A	0.283845	-18.4736	2.96905	-6.22208	4.90614e-10	6.82978e-08
Contig51127	ref|XP_011866432.1| PREDICTED: RE1-silencing transcription factor B-like isoform X2 [Vollenhovia emeryi]	0.372345	-18.4627	2.96894	-6.21861	5.01592e-10	6.97573e-08
Contig74099	#N/A	0.176485	-18.4578	2.97023	-6.21426	5.15679e-10	7.15755e-08
Contig75979	#N/A	0.36907	-18.4427	2.96909	-6.21157	5.24592e-10	7.27412e-08
Contig57533	ref|XP_011161726.1| PREDICTED: uncharacterized protein LOC105197177 [Solenopsis invicta]	0.15929	-18.4303	2.96728	-6.21119	5.25849e-10	7.2844e-08
Contig149190	ref|XP_011696169.1| PREDICTED: leukotriene A-4 hydrolase [Wasmannia auropunctata]	0.22958	-18.4006	2.96923	-6.1971	5.75113e-10	7.92797e-08
Contig128190	ref|XP_011881883.1| PREDICTED: uncharacterized protein LOC105569771 [Vollenhovia emeryi]	0.349174	-18.4002	2.96905	-6.19733	5.74299e-10	7.92449e-08
Contig83992	ref|XP_012532612.1| PREDICTED: uncharacterized protein LOC105834577 [Monomorium pharaonis]	0.464807	-18.394	2.96857	-6.19625	5.78251e-10	7.96346e-08
Contig32324	#N/A	0.398924	-18.3897	2.96893	-6.19407	5.8632e-10	8.06672e-08
Contig135588	ref|XP_011861169.1| PREDICTED: mitogen-activated protein kinase-binding protein 1 isoform X4 [Vollenhovia emeryi]	6.14802	-18.3728	2.95216	-6.22351	4.86153e-10	6.78104e-08
Contig15535	#N/A	0.365834	-18.3721	2.969	-6.18799	6.09361e-10	8.36743e-08
Contig97190	ref|XP_011691843.1| PREDICTED: protein CIP2A isoform X2 [Wasmannia auropunctata]	16.9237	-18.3589	2.94658	-6.2306	4.64657e-10	6.50691e-08
Contig134555	#N/A	0.221644	-18.3416	2.96923	-6.17721	6.5244e-10	8.95027e-08
Contig114016	ref|XP_011876437.1| PREDICTED: short/branched chain specific acyl-CoA dehydrogenase, mitochondrial-like [Vollenhovia emeryi]	0.310321	-18.3311	2.96941	-6.17333	6.68675e-10	9.1552e-08
Contig100933	#N/A	0.203644	-18.3154	2.96923	-6.16838	6.89927e-10	9.42792e-08
Contig70569	ref|XP_006811583.1| PREDICTED: prosaposin-like [Saccoglossus kowalevskii]	0.432564	-18.3104	2.96907	-6.16706	6.95731e-10	9.49803e-08
Contig32328	ref|XP_016941643.1| PREDICTED: 14-3-3 protein epsilon [Drosophila suzukii]	0.354789	-18.2966	2.96915	-6.16223	7.17254e-10	9.78241e-08
Contig101942	ref|XP_011871807.1| PREDICTED: uncharacterized protein LOC105564200 [Vollenhovia emeryi]	0.214167	-18.2865	2.96923	-6.15866	7.33621e-10	9.97676e-08
Contig51052	#N/A	0.214167	-18.2865	2.96923	-6.15866	7.33621e-10	9.97676e-08
Contig71718	ref|XP_012522206.1| PREDICTED: LOW QUALITY PROTEIN: uncharacterized protein LOC105828431 [Monomorium pharaonis]	0.316192	-18.2824	2.96911	-6.15753	7.38879e-10	1.00386e-07
Contig39104	ref|XP_002056815.1| uncharacterized protein Dvir_GJ16679 [Drosophila virilis]	0.389711	-18.2775	2.96915	-6.15582	7.46896e-10	1.0128e-07
Contig113773	#N/A	0.202222	-18.268	2.96935	-6.15218	7.64262e-10	1.03239e-07
Contig143680	ref|XP_011865165.1| PREDICTED: axonemal 84 kDa protein-like [Vollenhovia emeryi]	0.467689	-18.2678	2.96886	-6.15315	7.59595e-10	1.02707e-07
Contig65996	ref|XP_011633708.1| PREDICTED: sodium-independent sulfate anion transporter-like isoform X3 [Pogonomyrmex barbatus]	0.146322	-18.2668	2.96783	-6.15495	7.51022e-10	1.01645e-07
Contig98512	ref|XP_011872886.1| PREDICTED: protein NETWORKED 1D-like isoform X2 [Vollenhovia emeryi]	0.323238	-18.2635	2.96905	-6.15129	7.6857e-10	1.03722e-07
Contig72309	#N/A	0.338209	-18.2557	2.96923	-6.14829	7.83224e-10	1.05498e-07
Contig133053	#N/A	0.337707	-18.2493	2.96895	-6.1467	7.91136e-10	1.06462e-07
Contig84860	ref|XP_005089168.1| PREDICTED: transmembrane 9 superfamily member 4-like isoform X1 [Aplysia californica]	0.341026	-18.2108	2.96916	-6.13333	8.60604e-10	1.15229e-07
Contig46842	ref|XP_014208072.1| PREDICTED: beta-hexosaminidase subunit beta-like [Copidosoma floridanum]	0.326744	-18.2101	2.96917	-6.13307	8.61994e-10	1.15229e-07
Contig52712	#N/A	0.326744	-18.2101	2.96917	-6.13307	8.61994e-10	1.15229e-07
Contig39417	#N/A	0.286225	-18.2049	2.96923	-6.13119	8.7222e-10	1.16376e-07
Contig102835	ref|XP_011873615.1| PREDICTED: vinculin isoform X5 [Vollenhovia emeryi]	1.00854	-18.2003	2.95447	-6.16025	7.26299e-10	9.89623e-08
Contig135543	#N/A	0.413556	-18.1825	2.96898	-6.12415	9.11697e-10	1.21528e-07
Contig89567	ref|XP_011860147.1| PREDICTED: uncharacterized protein LOC105557504 isoform X2 [Vollenhovia emeryi]	0.385857	-18.1817	2.96919	-6.12346	9.15657e-10	1.21941e-07
Contig120458	ref|XP_011877637.1| PREDICTED: cardioacceleratory peptide receptor-like isoform X1 [Vollenhovia emeryi]	1.12211	-18.1781	2.95316	-6.15548	7.48526e-10	1.01404e-07
Contig93886	ref|XP_014095333.1| PREDICTED: cytochrome c oxidase subunit 5B, mitochondrial [Bactrocera oleae]	0.338912	-18.1569	2.96904	-6.11543	9.62945e-10	1.28118e-07
Contig150187	#N/A	0.120268	-18.1427	2.97114	-6.1063	1.01968e-09	1.35411e-07
Contig126014	#N/A	0.363561	-18.142	2.969	-6.11047	9.93379e-10	1.32043e-07
Contig71392	ref|XP_015598064.1| PREDICTED: uncharacterized protein LOC107269101 [Cephus cinctus]	2.94463	-18.1335	2.95677	-6.13288	8.63006e-10	1.15255e-07
Contig97560	ref|XP_011860183.1| PREDICTED: phosphoglycerate kinase, cytosolic-like [Vollenhovia emeryi]	0.310867	-18.1236	2.96908	-6.10412	1.03371e-09	1.37017e-07
Contig124903	ref|XP_011870203.1| PREDICTED: uncharacterized protein LOC105563313 [Vollenhovia emeryi]	0.371849	-18.1139	2.96895	-6.1011	1.05344e-09	1.3924e-07
Contig124750	ref|XP_011860077.1| PREDICTED: aminopeptidase N-like, partial [Vollenhovia emeryi]	0.130853	-18.1129	2.96783	-6.10309	1.0404e-09	1.37646e-07
Contig95681	ref|XP_011055938.1| PREDICTED: lysosomal aspartic protease-like [Acromyrmex echinatior]	0.130853	-18.1129	2.96783	-6.10309	1.0404e-09	1.37646e-07
Contig140286	ref|XP_012542672.1| PREDICTED: uncharacterized protein K02A2.6-like [Monomorium pharaonis]	0.324661	-18.1072	2.96895	-6.09884	1.06843e-09	1.4109e-07
Contig128497	#N/A	0.197193	-18.0993	2.96952	-6.09502	1.09427e-09	1.44232e-07
Contig66728	ref|XP_012249081.1| PREDICTED: probable lactoylglutathione lyase, chloroplast [Bombus impatiens]	0.386795	-18.0984	2.96911	-6.09558	1.09041e-09	1.43858e-07
Contig79079	#N/A	0.198973	-18.0941	2.96952	-6.09329	1.10615e-09	1.45662e-07
Contig103280	ref|XP_011873943.1| PREDICTED: chymotrypsin-1-like [Vollenhovia emeryi]	4.91007	-18.0907	2.97132	-6.08845	1.14012e-09	1.49856e-07
Contig45012	#N/A	0.257328	-18.0831	2.96935	-6.08992	1.1297e-09	1.48624e-07
Contig139688	#N/A	0.169507	-18.0759	2.96959	-6.08701	1.1504e-09	1.51067e-07
Contig89058	#N/A	0.268024	-18.0245	2.96928	-6.07033	1.27647e-09	1.67156e-07
Contig45740	#N/A	0.273823	-18.0185	2.96935	-6.06815	1.29388e-09	1.68655e-07
Contig4621	ref|XP_014669690.1| PREDICTED: transcription factor BTF3 homolog 4-like isoform X2 [Priapulus caudatus]	0.273823	-18.0185	2.96935	-6.06815	1.29388e-09	1.68655e-07
Contig70391	ref|XP_009026500.1| hypothetical protein HELRODRAFT_193555 [Helobdella robusta]	0.273823	-18.0185	2.96935	-6.06815	1.29388e-09	1.68655e-07
Contig86644	#N/A	0.273823	-18.0185	2.96935	-6.06815	1.29388e-09	1.68655e-07
Contig96705	#N/A	0.273823	-18.0185	2.96935	-6.06815	1.29388e-09	1.68655e-07
Contig65722	ref|XP_009162918.1| hypothetical protein T265_00782 [Opisthorchis viverrini]	0.286482	-18.0068	2.96889	-6.06517	1.31814e-09	1.71659e-07
Contig90495	ref|XP_015752019.1| PREDICTED: adiponectin receptor protein 1-like [Acropora digitifera]	0.351346	-18.0062	2.96911	-6.06452	1.32351e-09	1.72199e-07
Contig38298	ref|XP_011156622.1| PREDICTED: uncharacterized protein LOC105193745 [Solenopsis invicta]	0.485589	-18.0015	2.96903	-6.06309	1.3353e-09	1.73572e-07
Contig129392	#N/A	0.290638	-17.9663	2.96919	-6.05089	1.44044e-09	1.87068e-07
Contig147150	ref|XP_011707305.1| PREDICTED: beta carbonic anhydrase 1 isoform X1 [Wasmannia auropunctata]	1.36015	-17.9542	2.95062	-6.0849	1.16565e-09	1.52927e-07
Contig35427	#N/A	0.269038	-17.9459	2.96911	-6.04419	1.50164e-09	1.94836e-07
Contig65648	#N/A	0.244308	-17.9247	2.96916	-6.03695	1.57053e-09	2.03215e-07
Contig93299	#N/A	0.244308	-17.9247	2.96916	-6.03695	1.57053e-09	2.03215e-07
Contig93683	#N/A	0.228596	-17.9187	2.96916	-6.03493	1.59028e-09	2.05395e-07
Contig144944	#N/A	0.180082	-17.9088	2.96959	-6.03074	1.6321e-09	2.10603e-07
Contig19512	#N/A	0.99751	-17.9062	2.96642	-6.0363	1.57689e-09	2.03852e-07
Contig58861	#N/A	0.278397	-17.9008	2.96923	-6.02876	1.65218e-09	2.12806e-07
Contig80165	#N/A	0.297301	-17.8847	2.96913	-6.02353	1.70649e-09	2.19401e-07
Contig55704	#N/A	0.28765	-17.882	2.96923	-6.02243	1.71818e-09	2.20503e-07
Contig62065	#N/A	0.283557	-17.8687	2.96894	-6.01855	1.75988e-09	2.2565e-07
Contig51888	#N/A	0.399696	-17.86	2.95832	-6.0372	1.56811e-09	2.03215e-07
Contig53589	#N/A	0.311115	-17.8376	2.96893	-6.00808	1.87728e-09	2.4005e-07
Contig51746	#N/A	0.295256	-17.835	2.96923	-6.00662	1.89434e-09	2.41357e-07
Contig63551	ref|XP_013403626.1| PREDICTED: 40S ribosomal protein S3a-like [Lingula anatina]	0.295256	-17.835	2.96923	-6.00662	1.89434e-09	2.41357e-07
Contig74975	#N/A	0.295256	-17.835	2.96923	-6.00662	1.89434e-09	2.41357e-07
Contig95435	ref|XP_002057727.1| uncharacterized protein Dvir_GJ17943 [Drosophila virilis]	0.295256	-17.835	2.96923	-6.00662	1.89434e-09	2.41357e-07
Contig47940	#N/A	0.247628	-17.8061	2.96822	-5.99891	1.98644e-09	2.52864e-07
Contig57608	#N/A	0.617489	-17.7796	2.96935	-5.98771	2.12813e-09	2.70412e-07
Contig82496	#N/A	0.265428	-17.7775	2.96907	-5.98755	2.13021e-09	2.70434e-07
Contig100302	ref|XP_012524516.1| PREDICTED: L-galactose dehydrogenase-like isoform X1 [Monomorium pharaonis]	0.302937	-17.7482	2.96895	-5.97794	2.25972e-09	2.86617e-07
Contig124367	#N/A	0.180013	-17.7441	2.96947	-5.97551	2.29365e-09	2.9014e-07
Contig138009	ref|XP_011867771.1| PREDICTED: LOW QUALITY PROTEIN: cationic amino acid transporter 3 [Vollenhovia emeryi]	0.180013	-17.7441	2.96947	-5.97551	2.29365e-09	2.9014e-07
Contig55626	#N/A	0.239694	-17.7398	2.96947	-5.97405	2.31439e-09	2.91719e-07
Contig58912	#N/A	0.239694	-17.7398	2.96947	-5.97405	2.31439e-09	2.91719e-07
Contig62599	ref|XP_013412642.1| PREDICTED: 40S ribosomal protein S18 [Lingula anatina]	0.239694	-17.7398	2.96947	-5.97405	2.31439e-09	2.91719e-07
Contig63262	ref|XP_015773190.1| PREDICTED: dnaJ homolog subfamily B member 13-like [Acropora digitifera]	0.239694	-17.7398	2.96947	-5.97405	2.31439e-09	2.91719e-07
Contig48029	#N/A	0.296311	-17.7324	2.96947	-5.97158	2.34964e-09	2.95371e-07
Contig92115	#N/A	0.296311	-17.7324	2.96947	-5.97158	2.34964e-09	2.95371e-07
Contig92479	#N/A	0.296311	-17.7324	2.96947	-5.97158	2.34964e-09	2.95371e-07
Contig53172	#N/A	0.484165	-17.7081	2.96933	-5.96368	2.46615e-09	3.09742e-07
Contig103321	#N/A	0.256662	-17.6944	2.96916	-5.95942	2.53137e-09	3.17652e-07
Contig132593	ref|XP_011701495.1| PREDICTED: uncharacterized protein LOC105458122 [Wasmannia auropunctata]	0.259271	-17.6886	2.96916	-5.95745	2.562e-09	3.2121e-07
Contig51466	#N/A	0.256742	-17.6865	2.96923	-5.95659	2.5756e-09	3.22629e-07
Contig76782	#N/A	0.17283	-17.6391	2.96959	-5.93992	2.85158e-09	3.56566e-07
Contig144907	ref|XP_011865507.1| PREDICTED: leucine-rich repeat-containing protein 48-like [Vollenhovia emeryi]	0.23381	-17.617	2.96907	-5.93349	2.9656e-09	3.70169e-07
Contig119888	ref|XP_011170369.1| PREDICTED: uncharacterized protein LOC105203292 [Solenopsis invicta]	8.27863	-17.6059	2.93631	-5.99593	2.02322e-09	2.57314e-07
Contig103459	#N/A	0.150045	-17.6058	2.96971	-5.92845	3.05801e-09	3.80025e-07
Contig119364	#N/A	0.150045	-17.6058	2.96971	-5.92845	3.05801e-09	3.80025e-07
Contig132838	#N/A	0.150045	-17.6058	2.96971	-5.92845	3.05801e-09	3.80025e-07
Contig77344	ref|XP_012535990.1| PREDICTED: DNA ligase 1 isoform X2 [Monomorium pharaonis]	0.387396	-17.6043	2.96892	-5.92952	3.03818e-09	3.78558e-07
Contig62541	#N/A	0.302512	-17.5947	2.96916	-5.92582	3.1074e-09	3.85822e-07
Contig37973	ref|XP_005092452.1| PREDICTED: desumoylating isopeptidase 1-like [Aplysia californica]	0.333621	-17.5884	2.9692	-5.92362	3.14934e-09	3.90344e-07
Contig90274	ref|XP_013095417.1| PREDICTED: transmembrane 9 superfamily member 4-like [Biomphalaria glabrata]	0.333621	-17.5884	2.9692	-5.92362	3.14934e-09	3.90344e-07
Contig50289	#N/A	0.282622	-17.5807	2.96944	-5.92055	3.20861e-09	3.97341e-07
Contig49908	ref|XP_011697267.1| PREDICTED: uncharacterized protein CG7065-like [Wasmannia auropunctata]	0.25719	-17.54	2.96807	-5.90957	3.43e-09	4.24386e-07
Contig46250	ref|XP_013080018.1| PREDICTED: annexin A6-like [Biomphalaria glabrata]	0.305577	-17.5355	2.96923	-5.90573	3.51094e-09	4.3402e-07
Contig120687	#N/A	0.228196	-17.5247	2.9692	-5.90217	3.5876e-09	4.43109e-07
Contig126572	ref|XP_011303380.1| PREDICTED: uncharacterized protein LOC105266714 [Fopius arisanus]	30.0872	-17.5215	2.95321	-5.93304	2.97371e-09	3.70853e-07
Contig141690	#N/A	0.221437	-17.5196	2.96923	-5.90038	3.62671e-09	4.47549e-07
Contig1395	#N/A	0.289407	-17.5171	2.96891	-5.90017	3.63122e-09	4.47714e-07
Contig73666	ref|XP_011882902.1| PREDICTED: rho GTPase-activating protein 26 isoform X1 [Vollenhovia emeryi]	0.407968	-17.5139	2.969	-5.89892	3.65896e-09	4.50742e-07
Contig46830	ref|XP_013417218.1| PREDICTED: 5-hydroxyisourate hydrolase-like isoform X2 [Lingula anatina]	0.248694	-17.512	2.96923	-5.89782	3.68329e-09	4.52948e-07
Contig50142	#N/A	0.248694	-17.512	2.96923	-5.89782	3.68329e-09	4.52948e-07
Contig80645	#N/A	0.342873	-17.5101	2.96947	-5.89671	3.70818e-09	4.55613e-07
Contig79310	ref|XP_014667293.1| PREDICTED: GDP-D-glucose phosphorylase 1-like [Priapulus caudatus]	0.434412	-17.4947	2.96941	-5.89166	3.82345e-09	4.69367e-07
Contig46145	#N/A	0.228053	-17.487	2.96959	-5.88868	3.89299e-09	4.76661e-07
Contig74668	#N/A	0.228053	-17.487	2.96959	-5.88868	3.89299e-09	4.76661e-07
Contig81203	ref|XP_011685474.1| PREDICTED: uncharacterized protein LOC105448526 [Wasmannia auropunctata]	0.228053	-17.487	2.96959	-5.88868	3.89299e-09	4.76661e-07
Contig92615	#N/A	0.315897	-17.4791	2.96941	-5.8864	3.94694e-09	4.8285e-07
Contig37947	ref|XP_014790039.1| PREDICTED: polygalacturonase-like, partial [Octopus bimaculoides]	0.323301	-17.4713	2.96916	-5.88426	3.9983e-09	4.87444e-07
Contig48208	ref|XP_013774379.1| PREDICTED: 2,3-bisphosphoglycerate-independent phosphoglycerate mutase-like [Limulus polyphemus]	0.323301	-17.4713	2.96916	-5.88426	3.9983e-09	4.87444e-07
Contig62573	ref|XP_009028005.1| hypothetical protein HELRODRAFT_88075 [Helobdella robusta]	0.323301	-17.4713	2.96916	-5.88426	3.9983e-09	4.87444e-07
Contig94395	#N/A	0.323301	-17.4713	2.96916	-5.88426	3.9983e-09	4.87444e-07
Contig106450	#N/A	0.231913	-17.4677	2.96928	-5.88281	4.03348e-09	4.902e-07
Contig125395	#N/A	0.231913	-17.4677	2.96928	-5.88281	4.03348e-09	4.902e-07
Contig14732	ref|XP_012150756.1| PREDICTED: longitudinals lacking protein, isoforms A/B/D/L-like isoform X29 [Megachile rotundata]	0.252863	-17.4663	2.96935	-5.8822	4.04856e-09	4.902e-07
Contig49450	#N/A	0.252863	-17.4663	2.96935	-5.8822	4.04856e-09	4.902e-07
Contig93682	#N/A	0.269138	-17.4662	2.969	-5.88284	4.03291e-09	4.902e-07
Contig79381	#N/A	0.277532	-17.4659	2.96928	-5.88219	4.04866e-09	4.902e-07
Contig92172	#N/A	0.277532	-17.4659	2.96928	-5.88219	4.04866e-09	4.902e-07
Contig98889	#N/A	0.277532	-17.4659	2.96928	-5.88219	4.04866e-09	4.902e-07
Contig87752	ref|XP_011876679.1| PREDICTED: apyrase-like [Vollenhovia emeryi]	0.287554	-17.4466	2.96898	-5.87632	4.19495e-09	5.07478e-07
Contig143099	#N/A	0.23468	-17.4357	2.96911	-5.87236	4.29623e-09	5.19286e-07
Contig47316	#N/A	0.222255	-17.4046	2.96952	-5.86108	4.59859e-09	5.54882e-07
Contig51205	#N/A	0.222255	-17.4046	2.96952	-5.86108	4.59859e-09	5.54882e-07
Contig137069	#N/A	0.324236	-17.3694	2.96947	-5.84933	4.93548e-09	5.95025e-07
Contig109585	ref|XP_011629509.1| PREDICTED: N(G),N(G)-dimethylarginine dimethylaminohydrolase 1 isoform X1 [Pogonomyrmex barbatus]	0.215278	-17.3593	2.96952	-5.84583	5.04036e-09	6.07151e-07
Contig86925	#N/A	0.304783	-17.3314	2.96911	-5.83723	5.30752e-09	6.38787e-07
Contig47869	#N/A	0.25652	-17.3184	2.96905	-5.83297	5.4451e-09	6.54231e-07
Contig61927	ref|XP_015113538.1| PREDICTED: uncharacterized protein LOC107038782 [Diachasma alloeum]	0.25652	-17.3184	2.96905	-5.83297	5.4451e-09	6.54231e-07
Contig97567	#N/A	0.249487	-17.2906	2.96935	-5.82301	5.77971e-09	6.93256e-07
Contig103116	#N/A	0.196727	-17.2788	2.96952	-5.81873	5.92953e-09	7.10623e-07
Contig121757	#N/A	0.270448	-17.2717	2.96939	-5.81657	6.00659e-09	7.19249e-07
Contig32279	ref|XP_780556.3| PREDICTED: serine/threonine-protein kinase 33 [Strongylocentrotus purpuratus]	0.251335	-17.2677	2.96959	-5.81483	6.06938e-09	7.21873e-07
Contig33554	ref|XP_011860193.1| PREDICTED: LOW QUALITY PROTEIN: NADH dehydrogenase [ubiquinone] flavoprotein 1, mitochondrial-like [Vollenhovia emeryi]	0.251335	-17.2677	2.96959	-5.81483	6.06938e-09	7.21873e-07
Contig38022	ref|XP_017042039.1| PREDICTED: LOW QUALITY PROTEIN: thioredoxin reductase-like [Drosophila ficusphila]	0.251335	-17.2677	2.96959	-5.81483	6.06938e-09	7.21873e-07
Contig51275	ref|XP_002157151.1| PREDICTED: 60S ribosomal protein L4-B-like [Hydra vulgaris]	0.251335	-17.2677	2.96959	-5.81483	6.06938e-09	7.21873e-07
Contig54484	#N/A	0.251335	-17.2677	2.96959	-5.81483	6.06938e-09	7.21873e-07
Contig63106	ref|XP_011633314.1| PREDICTED: proteasome subunit beta type-2-like [Pogonomyrmex barbatus]	0.251335	-17.2677	2.96959	-5.81483	6.06938e-09	7.21873e-07
Contig65545	#N/A	0.251335	-17.2677	2.96959	-5.81483	6.06938e-09	7.21873e-07
Contig86087	#N/A	0.251335	-17.2677	2.96959	-5.81483	6.06938e-09	7.21873e-07
Contig80555	ref|XP_011064628.1| PREDICTED: 2-amino-3-ketobutyrate coenzyme A ligase, mitochondrial [Acromyrmex echinatior]	0.420004	-17.2651	2.96353	-5.82583	5.68287e-09	6.8222e-07
Contig121857	#N/A	0.212461	-17.2604	2.96928	-5.81298	6.1369e-09	7.28677e-07
Contig127258	ref|XP_011634077.1| PREDICTED: slowpoke-binding protein isoform X1 [Pogonomyrmex barbatus]	0.350506	-17.2447	2.9689	-5.80844	6.30567e-09	7.48088e-07
Contig54801	ref|XP_013787174.1| PREDICTED: la-related protein 6-like [Limulus polyphemus]	0.241881	-17.2369	2.96935	-5.80493	6.43941e-09	7.62673e-07
Contig149470	#N/A	0.213805	-17.1962	2.96916	-5.7916	6.97206e-09	8.25068e-07
Contig46086	#N/A	0.225383	-17.191	2.96915	-5.78987	7.04392e-09	8.32874e-07
Contig88333	#N/A	0.270655	-17.1787	2.96923	-5.78558	7.22622e-09	8.53715e-07
Contig103254	ref|XP_012534025.1| PREDICTED: growth arrest-specific protein 8 [Monomorium pharaonis]	0.231201	-17.1748	2.96935	-5.78403	7.29336e-09	8.60927e-07
Contig102673	#N/A	0.185181	-17.1666	2.96947	-5.78103	7.42444e-09	8.75668e-07
Contig50515	#N/A	0.210973	-17.1589	2.96935	-5.77865	7.53007e-09	8.84436e-07
Contig63550	#N/A	0.210973	-17.1589	2.96935	-5.77865	7.53007e-09	8.84436e-07
Contig79249	#N/A	0.210973	-17.1589	2.96935	-5.77865	7.53007e-09	8.84436e-07
Contig90406	#N/A	0.210973	-17.1589	2.96935	-5.77865	7.53007e-09	8.84436e-07
Contig125232	#N/A	0.224242	-17.1582	2.96916	-5.77881	7.52323e-09	8.84436e-07
Contig139812	#N/A	0.169547	-17.1549	2.96952	-5.777	7.60421e-09	8.92402e-07
Contig87890	ref|XP_011164130.1| PREDICTED: lipoyl synthase, mitochondrial-like [Solenopsis invicta]	1.88526	-17.1508	2.95027	-5.81331	6.12492e-09	7.27866e-07
Contig43999	#N/A	0.194467	-17.1385	2.96928	-5.77193	7.83677e-09	9.17958e-07
Contig121385	ref|XP_012526066.1| PREDICTED: Down syndrome cell adhesion molecule-like protein Dscam2 isoform X1 [Monomorium pharaonis]	0.250569	-17.1264	2.96941	-5.7676	8.04103e-09	9.40541e-07
Contig125961	#N/A	0.201945	-17.1175	2.96935	-5.76473	8.17874e-09	9.55858e-07
Contig103155	ref|XP_011883558.1| PREDICTED: uncharacterized protein K02A2.6-like [Vollenhovia emeryi]	0.203368	-17.1137	2.96923	-5.76368	8.23017e-09	9.61073e-07
Contig38090	ref|XP_011170571.1| PREDICTED: uncharacterized protein LOC105203472, partial [Solenopsis invicta]	0.202948	-17.0925	2.96947	-5.75608	8.60897e-09	1.00448e-06
Contig60886	#N/A	0.189615	-17.072	2.96971	-5.7487	8.99304e-09	1.04522e-06
Contig94488	#N/A	0.189615	-17.072	2.96971	-5.7487	8.99304e-09	1.04522e-06
Contig143546	ref|XP_011872063.1| PREDICTED: cilia- and flagella-associated protein 43-like isoform X1 [Vollenhovia emeryi]	1.82113	-17.0594	2.95563	-5.77183	7.84146e-09	9.17958e-07
Contig49502	ref|XP_012534015.1| PREDICTED: protein RFT1 homolog [Monomorium pharaonis]	2.8049	-17.0576	2.95462	-5.7732	7.77815e-09	9.12057e-07
Contig143371	#N/A	0.213984	-17.0485	2.96908	-5.74201	9.35594e-09	1.08536e-06
Contig53500	ref|XP_012531132.1| PREDICTED: interleukin enhancer-binding factor 2 homolog [Monomorium pharaonis]	0.185311	-17.0171	2.96959	-5.73045	1.00162e-08	1.161e-06
Contig82039	ref|XP_009163783.1| hypothetical protein T265_01478 [Opisthorchis viverrini]	0.264571	-16.9735	2.96944	-5.71609	1.09006e-08	1.26248e-06
Contig149604	ref|XP_012528534.1| PREDICTED: ubiquitin-like modifier-activating enzyme 5 isoform X2 [Monomorium pharaonis]	0.207696	-16.949	2.96947	-5.70774	1.14486e-08	1.32486e-06
Contig93676	#N/A	0.221836	-16.9387	2.96939	-5.70445	1.16719e-08	1.34959e-06
Contig68666	#N/A	0.24261	-16.9375	2.96928	-5.70423	1.16868e-08	1.35021e-06
Contig28847	#N/A	0.251331	-16.932	2.96907	-5.70278	1.17869e-08	1.36067e-06
Contig149793	ref|XP_011692179.1| PREDICTED: tectonin beta-propeller repeat-containing protein isoform X1 [Wasmannia auropunctata]	5.33546	-16.9261	2.94548	-5.74646	9.11292e-09	1.05803e-06
Contig46099	#N/A	0.202036	-16.9108	2.96947	-5.69489	1.2345e-08	1.42138e-06
Contig92739	#N/A	0.202036	-16.9108	2.96947	-5.69489	1.2345e-08	1.42138e-06
Contig133683	#N/A	0.169369	-16.9103	2.96959	-5.6945	1.23732e-08	1.42138e-06
Contig141216	#N/A	0.169369	-16.9103	2.96959	-5.6945	1.23732e-08	1.42138e-06
Contig144065	ref|XP_011865072.1| PREDICTED: uncharacterized protein LOC105560510 isoform X1 [Vollenhovia emeryi]	0.169369	-16.9103	2.96959	-5.6945	1.23732e-08	1.42138e-06
Contig124872	ref|XP_011869364.1| PREDICTED: post-GPI attachment to proteins factor 3 isoform X2 [Vollenhovia emeryi]	0.164307	-16.9089	2.96952	-5.69415	1.23988e-08	1.42201e-06
Contig149669	ref|XP_011164921.1| PREDICTED: putative nuclease HARBI1 [Solenopsis invicta]	0.164307	-16.9089	2.96952	-5.69415	1.23988e-08	1.42201e-06
Contig42132	ref|XP_012274835.1| PREDICTED: putative nuclease HARBI1 [Orussus abietinus]	0.20426	-16.893	2.96916	-5.6895	1.27413e-08	1.46011e-06
Contig20455	#N/A	0.247213	-16.8915	2.96916	-5.68898	1.27797e-08	1.46331e-06
Contig63881	#N/A	0.304756	-16.8902	2.96904	-5.68877	1.27961e-08	1.46401e-06
Contig34185	ref|XP_011867685.1| PREDICTED: organic cation transporter protein-like isoform X1 [Vollenhovia emeryi]	2.4789	-16.8901	2.24474	-7.52432	5.29949e-14	1.51273e-11
Contig100473	#N/A	0.177592	-16.8665	2.96935	-5.68018	1.34552e-08	1.53445e-06
Contig99810	#N/A	0.177592	-16.8665	2.96935	-5.68018	1.34552e-08	1.53445e-06
Contig107163	#N/A	0.226846	-16.8551	2.96923	-5.6766	1.37399e-08	1.56438e-06
Contig38901	#N/A	0.226846	-16.8551	2.96923	-5.6766	1.37399e-08	1.56438e-06
Contig47847	#N/A	0.180816	-16.8319	2.96947	-5.66833	1.442e-08	1.63918e-06
Contig88918	#N/A	0.180816	-16.8319	2.96947	-5.66833	1.442e-08	1.63918e-06
Contig66073	#N/A	0.219034	-16.8219	2.96923	-5.6654	1.46686e-08	1.6661e-06
Contig47335	#N/A	0.205565	-16.798	2.96971	-5.65644	1.54547e-08	1.74139e-06
Contig70473	#N/A	0.205565	-16.798	2.96971	-5.65644	1.54547e-08	1.74139e-06
Contig80178	#N/A	0.205565	-16.798	2.96971	-5.65644	1.54547e-08	1.74139e-06
Contig82519	ref|XP_013174460.1| PREDICTED: UDP-glucose 6-dehydrogenase [Papilio xuthus]	0.205565	-16.798	2.96971	-5.65644	1.54547e-08	1.74139e-06
Contig88328	#N/A	0.205565	-16.798	2.96971	-5.65644	1.54547e-08	1.74139e-06
Contig94379	ref|XP_013111067.1| PREDICTED: galactokinase-like [Stomoxys calcitrans]	0.205565	-16.798	2.96971	-5.65644	1.54547e-08	1.74139e-06
Contig98157	#N/A	0.205565	-16.798	2.96971	-5.65644	1.54547e-08	1.74139e-06
Contig91383	#N/A	0.245705	-16.7685	2.96923	-5.64742	1.62873e-08	1.83228e-06
Contig96095	#N/A	0.214565	-16.7554	2.96935	-5.64279	1.67318e-08	1.8778e-06
Contig48884	ref|XP_011309210.1| PREDICTED: diacylglycerol kinase eta isoform X3 [Fopius arisanus]	0.213889	-16.7546	2.96916	-5.64288	1.67225e-08	1.8778e-06
Contig118373	ref|XP_012215186.1| PREDICTED: protein sprint isoform X1 [Linepithema humile]	0.205214	-16.7509	2.96916	-5.64164	1.68436e-08	1.88885e-06
Contig73989	ref|XP_011867487.1| PREDICTED: uncharacterized protein LOC105561788 [Vollenhovia emeryi]	1.00591	-16.7471	2.96867	-5.64128	1.6879e-08	1.89132e-06
Contig79085	#N/A	0.176051	-16.7368	2.96935	-5.6365	1.73538e-08	1.94144e-06
Contig96658	#N/A	0.176051	-16.7368	2.96935	-5.6365	1.73538e-08	1.94144e-06
Contig110870	#N/A	0.1734	-16.7301	2.96935	-5.63427	1.75805e-08	1.96525e-06
Contig53434	#N/A	3.3037	-16.7175	2.953	-5.6612	1.50316e-08	1.70459e-06
Contig132134	#N/A	0.27121	-16.7109	2.96905	-5.62837	1.81926e-08	2.02885e-06
Contig70879	ref|XP_011698932.1| PREDICTED: urea transporter 2-like isoform X3 [Wasmannia auropunctata]	4.81828	-16.7103	2.95087	-5.66283	1.48896e-08	1.68984e-06
Contig150075	ref|XP_011704647.1| PREDICTED: rab3 GTPase-activating protein non-catalytic subunit [Wasmannia auropunctata]	0.183923	-16.7087	2.96935	-5.62707	1.83295e-08	2.04251e-06
Contig136438	#N/A	0.275379	-16.7072	2.96917	-5.6269	1.8348e-08	2.04296e-06
Contig81495	#N/A	0.20843	-16.6985	2.96928	-5.62375	1.86854e-08	2.06838e-06
Contig48788	#N/A	0.221442	-16.6982	2.96947	-5.62327	1.87373e-08	2.06838e-06
Contig64763	#N/A	0.221442	-16.6982	2.96947	-5.62327	1.87373e-08	2.06838e-06
Contig67908	#N/A	0.221442	-16.6982	2.96947	-5.62327	1.87373e-08	2.06838e-06
Contig68791	ref|NP_001119693.1| ribosomal protein L27 [Acyrthosiphon pisum]	0.221442	-16.6982	2.96947	-5.62327	1.87373e-08	2.06838e-06
Contig73364	ref|XP_011665800.1| PREDICTED: NADP-dependent malic enzyme [Strongylocentrotus purpuratus]	0.221442	-16.6982	2.96947	-5.62327	1.87373e-08	2.06838e-06
Contig78635	ref|XP_011662912.1| PREDICTED: polyphosphoinositide phosphatase [Strongylocentrotus purpuratus]	0.221442	-16.6982	2.96947	-5.62327	1.87373e-08	2.06838e-06
Contig81167	ref|XP_013789191.1| PREDICTED: calcium-binding protein E63-1-like [Limulus polyphemus]	0.221442	-16.6982	2.96947	-5.62327	1.87373e-08	2.06838e-06
Contig88334	#N/A	0.221442	-16.6982	2.96947	-5.62327	1.87373e-08	2.06838e-06
Contig88423	#N/A	0.221442	-16.6982	2.96947	-5.62327	1.87373e-08	2.06838e-06
Contig96374	ref|XP_012937859.1| PREDICTED: LOW QUALITY PROTEIN: multidrug resistance protein 1-like, partial [Aplysia californica]	0.221442	-16.6982	2.96947	-5.62327	1.87373e-08	2.06838e-06
Contig65213	ref|XP_011566825.1| PREDICTED: V-type proton ATPase subunit B-like [Plutella xylostella]	0.287852	-16.6848	2.96944	-5.61886	1.92226e-08	2.11864e-06
Contig81456	#N/A	0.287852	-16.6848	2.96944	-5.61886	1.92226e-08	2.11864e-06
Contig15500	#N/A	0.274404	-16.6748	2.96911	-5.6161	1.9532e-08	2.15106e-06
Contig35028	#N/A	0.221369	-16.6556	2.96923	-5.60939	2.03044e-08	2.23265e-06
Contig118146	ref|XP_016946569.1| PREDICTED: nodulation protein NolG-like, partial [Drosophila biarmipes]	0.2555	-16.6524	2.9692	-5.60839	2.04212e-08	2.24374e-06
Contig84007	ref|XP_011880327.1| PREDICTED: twitchin isoform X23 [Vollenhovia emeryi]	0.243312	-16.6517	2.96939	-5.60777	2.04949e-08	2.25009e-06
Contig61293	#N/A	0.218734	-16.5914	2.96947	-5.58731	2.30615e-08	2.52598e-06
Contig65155	#N/A	1.09316	-16.5891	2.95721	-5.60972	2.02652e-08	2.23007e-06
Contig92222	ref|XP_011630563.1| PREDICTED: uncharacterized protein LOC105422756 [Pogonomyrmex barbatus]	0.224896	-16.5778	2.96941	-5.58287	2.36578e-08	2.58929e-06
Contig60825	#N/A	0.744497	-16.5748	2.63208	-6.29722	3.0303e-10	4.33373e-08
Contig124631	#N/A	0.203453	-16.571	2.96923	-5.58092	2.39248e-08	2.61648e-06
Contig116884	#N/A	0.235621	-16.559	2.96923	-5.57686	2.44896e-08	2.67412e-06
Contig117849	#N/A	0.235621	-16.559	2.96923	-5.57686	2.44896e-08	2.67412e-06
Contig124635	#N/A	0.153955	-16.5151	2.96959	-5.56141	2.67601e-08	2.91753e-06
Contig103333	#N/A	0.14201	-16.5071	2.96971	-5.55849	2.72113e-08	2.95305e-06
Contig112920	#N/A	0.14201	-16.5071	2.96971	-5.55849	2.72113e-08	2.95305e-06
Contig130585	#N/A	0.14201	-16.5071	2.96971	-5.55849	2.72113e-08	2.95305e-06
Contig133507	ref|XP_011866247.1| PREDICTED: transmembrane protein 26-like [Vollenhovia emeryi]	0.14201	-16.5071	2.96971	-5.55849	2.72113e-08	2.95305e-06
Contig135890	ref|XP_011049569.1| PREDICTED: uncharacterized protein LOC105143178 [Acromyrmex echinatior]	0.14201	-16.5071	2.96971	-5.55849	2.72113e-08	2.95305e-06
Contig148078	#N/A	0.14201	-16.5071	2.96971	-5.55849	2.72113e-08	2.95305e-06
Contig33867	#N/A	0.259807	-16.4963	2.96947	-5.55531	2.77121e-08	2.9982e-06
Contig47127	ref|XP_002737647.2| PREDICTED: UDP-glucuronic acid decarboxylase 1-like [Saccoglossus kowalevskii]	0.259807	-16.4963	2.96947	-5.55531	2.77121e-08	2.9982e-06
Contig62196	#N/A	0.259807	-16.4963	2.96947	-5.55531	2.77121e-08	2.9982e-06
Contig80629	#N/A	0.259807	-16.4963	2.96947	-5.55531	2.77121e-08	2.9982e-06
Contig79929	#N/A	0.422771	-16.473	2.96919	-5.54795	2.89032e-08	3.11751e-06
Contig92808	#N/A	0.422771	-16.473	2.96919	-5.54795	2.89032e-08	3.11751e-06
Contig139636	#N/A	0.216823	-16.451	2.96935	-5.54025	3.02037e-08	3.25034e-06
Contig141121	ref|XP_011696169.1| PREDICTED: leukotriene A-4 hydrolase [Wasmannia auropunctata]	0.285453	-16.4405	2.96952	-5.5364	3.08744e-08	3.31242e-06
Contig45231	#N/A	0.196112	-16.4312	2.96959	-5.53315	3.1453e-08	3.37194e-06
Contig35451	#N/A	0.165204	-16.415	2.96959	-5.52769	3.24482e-08	3.46811e-06
Contig67298	#N/A	0.165204	-16.415	2.96959	-5.52769	3.24482e-08	3.46811e-06
Contig72992	#N/A	0.165204	-16.415	2.96959	-5.52769	3.24482e-08	3.46811e-06
Contig94401	#N/A	0.165204	-16.415	2.96959	-5.52769	3.24482e-08	3.46811e-06
Contig83037	ref|XP_011864300.1| PREDICTED: short-chain dehydrogenase/reductase family 16C member 6 isoform X1 [Vollenhovia emeryi]	0.188064	-16.4127	2.96947	-5.52714	3.25491e-08	3.47625e-06
Contig102314	#N/A	0.151182	-16.4076	2.96959	-5.52521	3.29083e-08	3.50139e-06
Contig128628	#N/A	0.151182	-16.4076	2.96959	-5.52521	3.29083e-08	3.50139e-06
Contig146932	#N/A	0.151182	-16.4076	2.96959	-5.52521	3.29083e-08	3.50139e-06
Contig148679	#N/A	0.151182	-16.4076	2.96959	-5.52521	3.29083e-08	3.50139e-06
Contig62181	#N/A	0.184279	-16.3916	2.96947	-5.52004	3.3893e-08	3.60001e-06
Contig32254	#N/A	0.231762	-16.3908	2.96952	-5.51968	3.39626e-08	3.60001e-06
Contig32354	#N/A	0.231762	-16.3908	2.96952	-5.51968	3.39626e-08	3.60001e-06
Contig43620	ref|XP_015917610.1| PREDICTED: histidine triad nucleotide-binding protein 3-like isoform X1 [Parasteatoda tepidariorum]	0.231762	-16.3908	2.96952	-5.51968	3.39626e-08	3.60001e-06
Contig94177	#N/A	0.231762	-16.3908	2.96952	-5.51968	3.39626e-08	3.60001e-06
Contig25067	ref|XP_011872380.1| PREDICTED: uncharacterized protein LOC105564547 [Vollenhovia emeryi]	51.6726	-16.3834	2.95514	-5.54403	2.95584e-08	3.18332e-06
Contig40239	#N/A	0.204745	-16.3822	2.96952	-5.51677	3.45282e-08	3.65174e-06
Contig42774	#N/A	0.204745	-16.3822	2.96952	-5.51677	3.45282e-08	3.65174e-06
Contig71418	ref|XP_011632520.1| PREDICTED: protein PIH1D3 [Pogonomyrmex barbatus]	0.204745	-16.3822	2.96952	-5.51677	3.45282e-08	3.65174e-06
Contig56581	#N/A	0.18652	-16.3635	2.96947	-5.51059	3.57642e-08	3.76837e-06
Contig79472	ref|XP_011168810.1| PREDICTED: guanine nucleotide-releasing factor 2 [Solenopsis invicta]	0.18652	-16.3635	2.96947	-5.51059	3.57642e-08	3.76837e-06
Contig81682	#N/A	0.18652	-16.3635	2.96947	-5.51059	3.57642e-08	3.76837e-06
Contig86923	#N/A	0.18652	-16.3635	2.96947	-5.51059	3.57642e-08	3.76837e-06
Contig33577	#N/A	0.178755	-16.3602	2.96947	-5.50948	3.59899e-08	3.77806e-06
Contig46108	#N/A	0.178755	-16.3602	2.96947	-5.50948	3.59899e-08	3.77806e-06
Contig68961	#N/A	0.178755	-16.3602	2.96947	-5.50948	3.59899e-08	3.77806e-06
Contig73310	#N/A	0.178755	-16.3602	2.96947	-5.50948	3.59899e-08	3.77806e-06
Contig81522	#N/A	0.178755	-16.3602	2.96947	-5.50948	3.59899e-08	3.77806e-06
Contig141540	ref|XP_011868784.1| PREDICTED: cytochrome b5 reductase 4 isoform X1 [Vollenhovia emeryi]	3.15676	-16.3453	2.94734	-5.54577	2.92665e-08	3.15429e-06
Contig40244	#N/A	0.18362	-16.3405	2.96952	-5.50274	3.73942e-08	3.90228e-06
Contig43967	#N/A	0.18362	-16.3405	2.96952	-5.50274	3.73942e-08	3.90228e-06
Contig68901	ref|XP_015915654.1| PREDICTED: tigger transposable element-derived protein 2-like [Parasteatoda tepidariorum]	0.18362	-16.3405	2.96952	-5.50274	3.73942e-08	3.90228e-06
Contig72242	#N/A	0.18362	-16.3405	2.96952	-5.50274	3.73942e-08	3.90228e-06
Contig88980	#N/A	0.18362	-16.3405	2.96952	-5.50274	3.73942e-08	3.90228e-06
Contig90860	ref|XP_011493714.1| AAEL017153-PA [Aedes aegypti]	0.809039	-16.3092	2.96885	-5.49344	3.94176e-08	4.0943e-06
Contig104616	#N/A	0.78199	-16.3079	2.96871	-5.49327	3.94563e-08	4.0943e-06
Contig32911	ref|XP_017118398.1| PREDICTED: phosphoenolpyruvate carboxykinase [ATP]-like [Drosophila elegans]	0.193925	-16.3027	2.96971	-5.48965	4.02735e-08	4.15366e-06
Contig43009	#N/A	0.193925	-16.3027	2.96971	-5.48965	4.02735e-08	4.15366e-06
Contig45149	#N/A	0.193925	-16.3027	2.96971	-5.48965	4.02735e-08	4.15366e-06
Contig53567	#N/A	0.193925	-16.3027	2.96971	-5.48965	4.02735e-08	4.15366e-06
Contig60463	#N/A	0.193925	-16.3027	2.96971	-5.48965	4.02735e-08	4.15366e-06
Contig88663	#N/A	0.193925	-16.3027	2.96971	-5.48965	4.02735e-08	4.15366e-06
Contig95730	#N/A	0.193925	-16.3027	2.96971	-5.48965	4.02735e-08	4.15366e-06
Contig95827	ref|XP_011062264.1| PREDICTED: radial spoke head 10 homolog B2-like [Acromyrmex echinatior]	0.193925	-16.3027	2.96971	-5.48965	4.02735e-08	4.15366e-06
Contig148536	ref|XP_011698661.1| PREDICTED: serine protease inhibitor 3-like [Wasmannia auropunctata]	0.868819	-16.2541	2.96879	-5.475	4.375e-08	4.50565e-06
Contig62200	#N/A	0.180436	-16.2501	2.96959	-5.47215	4.44602e-08	4.55554e-06
Contig62419	#N/A	0.180436	-16.2501	2.96959	-5.47215	4.44602e-08	4.55554e-06
Contig67371	ref|XP_013399968.1| PREDICTED: trifunctional UDP-glucose 4,6-dehydratase/UDP-4-keto-6-deoxy-D-glucose 3,5-epimerase/UDP-4-keto-L-rhamnose-reductase RHM1-like [Lingula anatina]	0.180436	-16.2501	2.96959	-5.47215	4.44602e-08	4.55554e-06
Contig71790	ref|XP_009009848.1| hypothetical protein HELRODRAFT_184872 [Helobdella robusta]	0.180436	-16.2501	2.96959	-5.47215	4.44602e-08	4.55554e-06
Contig71834	ref|XP_014085327.1| PREDICTED: cytochrome c oxidase copper chaperone [Bactrocera oleae]	0.180436	-16.2501	2.96959	-5.47215	4.44602e-08	4.55554e-06
Contig72963	#N/A	0.180436	-16.2501	2.96959	-5.47215	4.44602e-08	4.55554e-06
Contig98913	ref|XP_015908218.1| PREDICTED: myosin light chain kinase, smooth muscle-like [Parasteatoda tepidariorum]	0.180436	-16.2501	2.96959	-5.47215	4.44602e-08	4.55554e-06
Contig133279	ref|XP_011680762.1| PREDICTED: uncharacterized protein LOC583642 [Strongylocentrotus purpuratus]	0.194401	-16.2429	2.96919	-5.47046	4.48873e-08	4.59264e-06
Contig75191	ref|XP_012523147.1| PREDICTED: N-acetylglucosamine-6-sulfatase-like isoform X2 [Monomorium pharaonis]	0.194401	-16.2429	2.96919	-5.47046	4.48873e-08	4.59264e-06
Contig35396	ref|XP_011880888.1| PREDICTED: organic cation transporter protein isoform X3 [Vollenhovia emeryi]	0.207409	-16.2412	2.96944	-5.46944	4.51454e-08	4.61571e-06
Contig59249	#N/A	0.177448	-16.2385	2.96959	-5.46827	4.54462e-08	4.6431e-06
Contig122362	ref|XP_011879066.1| PREDICTED: aminopeptidase N-like isoform X1 [Vollenhovia emeryi]	2.63473	-16.2202	2.95277	-5.49322	3.94661e-08	4.0943e-06
Contig132747	ref|XP_012063996.1| PREDICTED: uncharacterized protein LOC105627321 [Atta cephalotes]	1.70915	-16.2156	2.95003	-5.49677	3.86817e-08	4.02178e-06
Contig32684	ref|XP_014790618.1| PREDICTED: metal tolerance protein 9-like isoform X2 [Octopus bimaculoides]	0.169968	-16.2103	2.96971	-5.45854	4.80062e-08	4.89051e-06
Contig38252	#N/A	0.169968	-16.2103	2.96971	-5.45854	4.80062e-08	4.89051e-06
Contig61452	#N/A	0.169968	-16.2103	2.96971	-5.45854	4.80062e-08	4.89051e-06
Contig32577	ref|XP_013303652.1| heat shock cognate protein 1 [Necator americanus]	0.343942	-16.1957	2.96939	-5.45423	4.91864e-08	4.99993e-06
Contig115510	#N/A	0.210812	-16.1866	2.96947	-5.45101	5.00852e-08	5.08762e-06
Contig67364	#N/A	0.203718	-16.155	2.96959	-5.44013	5.32427e-08	5.38129e-06
Contig69455	#N/A	0.203718	-16.155	2.96959	-5.44013	5.32427e-08	5.38129e-06
Contig81609	#N/A	0.203718	-16.155	2.96959	-5.44013	5.32427e-08	5.38129e-06
Contig109882	ref|XP_011866622.1| PREDICTED: DNA topoisomerase 2 isoform X2 [Vollenhovia emeryi]	4.22997	-16.154	2.94492	-5.48538	4.12579e-08	4.25209e-06
Contig111563	#N/A	0.151389	-16.1493	2.96995	-5.43758	5.40103e-08	5.45107e-06
Contig55995	ref|XP_011879786.1| PREDICTED: ELKS/Rab6-interacting/CAST family member 1 isoform X2 [Vollenhovia emeryi]	0.200729	-16.1453	2.96959	-5.43686	5.42282e-08	5.46525e-06
Contig87310	ref|XP_011859602.1| PREDICTED: uncharacterized protein LOC105557068, partial [Vollenhovia emeryi]	0.200729	-16.1453	2.96959	-5.43686	5.42282e-08	5.46525e-06
Contig131407	#N/A	0.16137	-16.1161	2.96952	-5.42718	5.72499e-08	5.76156e-06
Contig117391	#N/A	0.156443	-16.0953	2.96959	-5.42002	5.95918e-08	5.98021e-06
Contig131231	#N/A	0.156443	-16.0953	2.96959	-5.42002	5.95918e-08	5.98021e-06
Contig148703	#N/A	0.156443	-16.0953	2.96959	-5.42002	5.95918e-08	5.98021e-06
Contig130230	#N/A	0.169104	-16.0828	2.96995	-5.41518	6.12263e-08	6.11281e-06
Contig38078	#N/A	0.173431	-16.0813	2.96972	-5.41509	6.12592e-08	6.11281e-06
Contig60495	#N/A	0.173431	-16.0813	2.96972	-5.41509	6.12592e-08	6.11281e-06
Contig61319	#N/A	0.173431	-16.0813	2.96972	-5.41509	6.12592e-08	6.11281e-06
Contig65810	ref|XP_008184419.1| PREDICTED: ATP-dependent DNA helicase pif1-like [Acyrthosiphon pisum]	0.173431	-16.0813	2.96972	-5.41509	6.12592e-08	6.11281e-06
Contig95337	#N/A	0.173431	-16.0813	2.96972	-5.41509	6.12592e-08	6.11281e-06
Contig112098	ref|XP_011871397.1| PREDICTED: A disintegrin and metalloproteinase with thrombospondin motifs 18 isoform X1 [Vollenhovia emeryi]	1.81316	-16.0761	2.95754	-5.43564	5.45989e-08	5.49869e-06
Contig124410	#N/A	0.181901	-16.0569	2.96935	-5.40753	6.39003e-08	6.36737e-06
Contig98612	ref|XP_012528722.1| PREDICTED: kinesin-related protein 4 isoform X1 [Monomorium pharaonis]	4.69099	-16.055	2.95253	-5.43771	5.39709e-08	5.45098e-06
Contig39562	ref|XP_012536514.1| PREDICTED: uncharacterized protein LOC105836781 [Monomorium pharaonis]	0.146787	-16.0498	2.96971	-5.40451	6.49873e-08	6.43484e-06
Contig45249	#N/A	0.146787	-16.0498	2.96971	-5.40451	6.49873e-08	6.43484e-06
Contig53629	#N/A	0.146787	-16.0498	2.96971	-5.40451	6.49873e-08	6.43484e-06
Contig54043	ref|XP_011633438.1| PREDICTED: uncharacterized protein LOC105424739 [Pogonomyrmex barbatus]	0.146787	-16.0498	2.96971	-5.40451	6.49873e-08	6.43484e-06
Contig62208	#N/A	0.146787	-16.0498	2.96971	-5.40451	6.49873e-08	6.43484e-06
Contig64961	#N/A	0.146787	-16.0498	2.96971	-5.40451	6.49873e-08	6.43484e-06
Contig65844	#N/A	0.146787	-16.0498	2.96971	-5.40451	6.49873e-08	6.43484e-06
Contig84396	#N/A	0.146787	-16.0498	2.96971	-5.40451	6.49873e-08	6.43484e-06
Contig88407	#N/A	0.146787	-16.0498	2.96971	-5.40451	6.49873e-08	6.43484e-06
Contig108727	ref|XP_011632422.1| PREDICTED: LOW QUALITY PROTEIN: uncharacterized protein LOC105424077 [Pogonomyrmex barbatus]	0.183292	-16.0396	2.96928	-5.40185	6.59556e-08	6.52614e-06
Contig46223	ref|XP_009026500.1| hypothetical protein HELRODRAFT_193555 [Helobdella robusta]	0.208481	-16.017	2.96952	-5.39379	6.8985e-08	6.81158e-06
Contig72526	#N/A	0.208481	-16.017	2.96952	-5.39379	6.8985e-08	6.81158e-06
Contig26353	ref|XP_011685705.1| PREDICTED: gamma-tubulin complex component 5 isoform X3 [Wasmannia auropunctata]	5.28112	-15.9933	2.95508	-5.41215	6.22717e-08	6.20946e-06
Contig118689	#N/A	0.171978	-15.9787	2.96947	-5.38098	7.40795e-08	7.28915e-06
Contig119544	#N/A	0.702484	-15.9186	2.95572	-5.3857	7.21625e-08	7.10547e-06
Contig66472	ref|XP_011879931.1| PREDICTED: glutamate receptor ionotropic, kainate 2-like [Vollenhovia emeryi]	1.36939	-15.8964	2.95449	-5.38041	7.43168e-08	7.3074e-06
Contig147686	ref|XP_011875537.1| PREDICTED: U2 snRNP-associated SURP motif-containing protein isoform X1 [Vollenhovia emeryi]	1.6834	-15.8915	2.95575	-5.37646	7.59666e-08	7.45924e-06
Contig39184	#N/A	0.189745	-15.863	2.96959	-5.34181	9.20229e-08	8.95493e-06
Contig36713	#N/A	0.159796	-15.833	2.96995	-5.33106	9.764e-08	9.41723e-06
Contig46234	ref|XP_011871563.1| PREDICTED: uncharacterized protein LOC105564073 [Vollenhovia emeryi]	0.159796	-15.833	2.96995	-5.33106	9.764e-08	9.41723e-06
Contig48737	#N/A	0.159796	-15.833	2.96995	-5.33106	9.764e-08	9.41723e-06
Contig49139	ref|XP_013114284.1| PREDICTED: estrogen sulfotransferase [Stomoxys calcitrans]	0.159796	-15.833	2.96995	-5.33106	9.764e-08	9.41723e-06
Contig74188	#N/A	0.159796	-15.833	2.96995	-5.33106	9.764e-08	9.41723e-06
Contig81595	#N/A	0.159796	-15.833	2.96995	-5.33106	9.764e-08	9.41723e-06
Contig82372	#N/A	0.159796	-15.833	2.96995	-5.33106	9.764e-08	9.41723e-06
Contig84840	ref|XP_014679210.1| PREDICTED: endoplasmic reticulum-Golgi intermediate compartment protein 3-like [Priapulus caudatus]	0.159796	-15.833	2.96995	-5.33106	9.764e-08	9.41723e-06
Contig88033	#N/A	0.159796	-15.833	2.96995	-5.33106	9.764e-08	9.41723e-06
Contig90359	#N/A	0.159796	-15.833	2.96995	-5.33106	9.764e-08	9.41723e-06
Contig92722	ref|XP_975095.1| PREDICTED: mitochondrial 2-oxoglutarate/malate carrier protein [Tribolium castaneum]	0.159796	-15.833	2.96995	-5.33106	9.764e-08	9.41723e-06
Contig3007	#N/A	0.850415	-15.805	2.9482	-5.36091	8.28058e-08	8.08584e-06
Contig86081	ref|XP_013391180.1| PREDICTED: phosphoethanolamine N-methyltransferase-like [Lingula anatina]	0.364568	-15.7651	2.96941	-5.30918	1.10121e-07	1.05562e-05
Contig42403	ref|XP_011689564.1| PREDICTED: AN1-type zinc finger protein 2A [Wasmannia auropunctata]	1.19823	-15.7501	2.95473	-5.33046	9.79645e-08	9.44208e-06
Contig96026	#N/A	1.22829	-15.7302	2.94628	-5.33901	9.34575e-08	9.08827e-06
Contig75943	#N/A	0.354895	-15.7087	2.96905	-5.29083	1.21761e-07	1.16325e-05
Contig144263	ref|XP_011876322.1| PREDICTED: centrosomal protein of 164 kDa-like isoform X1 [Vollenhovia emeryi]	0.193747	-15.6951	2.96944	-5.28555	1.2533e-07	1.19573e-05
Contig106736	ref|XP_011066922.1| PREDICTED: uncharacterized protein LOC105153653 [Acromyrmex echinatior]	0.819793	-15.68	2.94991	-5.31543	1.06408e-07	1.0221e-05
Contig45859	ref|XP_002067427.1| uncharacterized protein Dwil_GK16414 [Drosophila willistoni]	0.175673	-15.6717	2.96971	-5.27716	1.312e-07	1.24501e-05
Contig60489	ref|XP_002737710.1| PREDICTED: transmembrane emp24 domain-containing protein 2-like isoform 1 [Saccoglossus kowalevskii]	0.175673	-15.6717	2.96971	-5.27716	1.312e-07	1.24501e-05
Contig65233	ref|XP_015792801.1| PREDICTED: 40S ribosomal protein S5 [Tetranychus urticae]	0.175673	-15.6717	2.96971	-5.27716	1.312e-07	1.24501e-05
Contig65263	ref|XP_013407774.1| PREDICTED: 1-phosphatidylinositol 4,5-bisphosphate phosphodiesterase delta-1-like isoform X4 [Lingula anatina]	0.175673	-15.6717	2.96971	-5.27716	1.312e-07	1.24501e-05
Contig75966	ref|XP_005089238.1| PREDICTED: succinyl-CoA ligase subunit alpha, mitochondrial-like isoform X3 [Aplysia californica]	0.175673	-15.6717	2.96971	-5.27716	1.312e-07	1.24501e-05
Contig79197	ref|XP_002163079.2| PREDICTED: gamma-aminobutyric acid receptor-associated protein-like 2 [Hydra vulgaris]	0.175673	-15.6717	2.96971	-5.27716	1.312e-07	1.24501e-05
Contig81265	ref|XP_014784023.1| PREDICTED: coiled-coil domain-containing protein 90B, mitochondrial-like [Octopus bimaculoides]	0.175673	-15.6717	2.96971	-5.27716	1.312e-07	1.24501e-05
Contig94499	#N/A	0.175673	-15.6717	2.96971	-5.27716	1.312e-07	1.24501e-05
Contig116302	ref|XP_394997.2| PREDICTED: general transcription factor IIH subunit 2 [Apis mellifera]	2.66356	-15.659	2.95432	-5.30038	1.15562e-07	1.10478e-05
Contig65982	ref|XP_011873888.1| PREDICTED: thyrotropin-releasing hormone receptor-like isoform X2 [Vollenhovia emeryi]	5.6933	-15.6564	2.95336	-5.3012	1.15043e-07	1.10056e-05
Contig90040	ref|XP_011875815.1| PREDICTED: isoaspartyl peptidase/L-asparaginase-like [Vollenhovia emeryi]	0.301093	-15.6344	2.96923	-5.26549	1.39818e-07	1.31881e-05
Contig126879	ref|XP_011067131.1| PREDICTED: uncharacterized protein LOC105153781 isoform X2 [Acromyrmex echinatior]	3.53267	-15.619	2.96025	-5.27623	1.31869e-07	1.25051e-05
Contig51864	ref|XP_013095645.1| PREDICTED: tubulin alpha-3 chain-like, partial [Biomphalaria glabrata]	0.388643	-15.5605	2.96944	-5.24024	1.60371e-07	1.50565e-05
Contig40662	#N/A	0.615519	-15.5189	2.95499	-5.25174	1.5067e-07	1.41645e-05
Contig80726	ref|XP_011880446.1| PREDICTED: caspase-1-like [Vollenhovia emeryi]	11.4509	-15.4839	2.3475	-6.59591	4.2265e-11	7.10943e-09
Contig135668	ref|XP_011051107.1| PREDICTED: uncharacterized protein LOC105144108 [Acromyrmex echinatior]	2.19194	-15.4808	2.85807	-5.41652	6.07703e-08	6.09416e-06
Contig134128	ref|XP_011861835.1| PREDICTED: dnaJ homolog subfamily C member 13, partial [Vollenhovia emeryi]	1.46742	-15.4717	2.95318	-5.23901	1.61436e-07	1.51464e-05
Contig37945	#N/A	0.143825	-15.427	2.96995	-5.19436	2.05429e-07	1.90838e-05
Contig51876	#N/A	0.143825	-15.427	2.96995	-5.19436	2.05429e-07	1.90838e-05
Contig62727	#N/A	0.143825	-15.427	2.96995	-5.19436	2.05429e-07	1.90838e-05
Contig63522	#N/A	0.143825	-15.427	2.96995	-5.19436	2.05429e-07	1.90838e-05
Contig81635	#N/A	0.143825	-15.427	2.96995	-5.19436	2.05429e-07	1.90838e-05
Contig96671	#N/A	0.143825	-15.427	2.96995	-5.19436	2.05429e-07	1.90838e-05
Contig98971	#N/A	0.143825	-15.427	2.96995	-5.19436	2.05429e-07	1.90838e-05
Contig74985	#N/A	0.297104	-15.4255	2.96952	-5.19462	2.0514e-07	1.90838e-05
Contig91133	#N/A	0.297104	-15.4255	2.96952	-5.19462	2.0514e-07	1.90838e-05
Contig94183	ref|XP_014229788.1| PREDICTED: UTP--glucose-1-phosphate uridylyltransferase isoform X1 [Trichogramma pretiosum]	0.297104	-15.4255	2.96952	-5.19462	2.0514e-07	1.90838e-05
Contig55044	#N/A	0.158014	-15.4214	2.97023	-5.192	2.0805e-07	1.93146e-05
Contig62766	#N/A	0.399084	-15.4061	2.95884	-5.2068	1.92123e-07	1.79778e-05
Contig119063	ref|XP_011877453.1| PREDICTED: protein transport protein Sec23A isoform X2 [Vollenhovia emeryi]	1.98849	-15.3859	2.70765	-5.68238	1.32835e-08	1.51731e-06
Contig47760	#N/A	0.146134	-15.3611	2.96996	-5.17215	2.31419e-07	2.13022e-05
Contig51416	#N/A	0.146134	-15.3611	2.96996	-5.17215	2.31419e-07	2.13022e-05
Contig59465	ref|XP_016656702.1| PREDICTED: uncharacterized protein LOC107882614 [Acyrthosiphon pisum]	0.146134	-15.3611	2.96996	-5.17215	2.31419e-07	2.13022e-05
Contig78571	#N/A	0.146134	-15.3611	2.96996	-5.17215	2.31419e-07	2.13022e-05
Contig82493	#N/A	0.146134	-15.3611	2.96996	-5.17215	2.31419e-07	2.13022e-05
Contig89361	#N/A	0.146134	-15.3611	2.96996	-5.17215	2.31419e-07	2.13022e-05
Contig91658	#N/A	0.146134	-15.3611	2.96996	-5.17215	2.31419e-07	2.13022e-05
Contig95327	#N/A	0.146134	-15.3611	2.96996	-5.17215	2.31419e-07	2.13022e-05
Contig70935	#N/A	1.04377	-15.3391	2.96176	-5.17903	2.23038e-07	2.06382e-05
Contig88403	#N/A	0.404201	-15.3284	2.9572	-5.18342	2.17852e-07	2.01848e-05
Contig66082	ref|XP_011861003.1| PREDICTED: uncharacterized protein LOC105558094 [Vollenhovia emeryi]	1.17254	-15.3098	2.95013	-5.18954	2.10812e-07	1.95582e-05
Contig39001	ref|XP_011860494.1| PREDICTED: uncharacterized protein LOC105557774 [Vollenhovia emeryi]	2.46904	-15.3061	2.95537	-5.17907	2.22992e-07	2.06382e-05
Contig39455	#N/A	0.952316	-15.2413	2.95535	-5.15718	2.50691e-07	2.30012e-05
Contig126530	#N/A	1.82205	-15.2315	2.94865	-5.16557	2.39708e-07	2.20364e-05
Contig17154	ref|XP_011174795.1| PREDICTED: LOW QUALITY PROTEIN: putative epidermal cell surface receptor [Solenopsis invicta]	0.980073	-15.1913	2.95518	-5.14059	2.73877e-07	2.50959e-05
Contig33034	ref|XP_017038712.1| PREDICTED: serine/threonine-protein phosphatase PP2A 65 kDa regulatory subunit-like, partial [Drosophila ficusphila]	0.147628	-15.1117	2.96995	-5.08818	3.61508e-07	3.27226e-05
Contig61317	#N/A	0.147628	-15.1117	2.96995	-5.08818	3.61508e-07	3.27226e-05
Contig71048	#N/A	0.147628	-15.1117	2.96995	-5.08818	3.61508e-07	3.27226e-05
Contig81322	#N/A	0.147628	-15.1117	2.96995	-5.08818	3.61508e-07	3.27226e-05
Contig81616	ref|XP_014673077.1| PREDICTED: eukaryotic translation initiation factor 3 subunit E-like [Priapulus caudatus]	0.147628	-15.1117	2.96995	-5.08818	3.61508e-07	3.27226e-05
Contig85382	ref|XP_013201012.1| PREDICTED: interleukin-1 receptor-associated kinase 4-like [Amyelois transitella]	0.147628	-15.1117	2.96995	-5.08818	3.61508e-07	3.27226e-05
Contig91381	#N/A	0.147628	-15.1117	2.96995	-5.08818	3.61508e-07	3.27226e-05
Contig93759	ref|XP_011872114.1| PREDICTED: cyclin-H isoform X3 [Vollenhovia emeryi]	0.147628	-15.1117	2.96995	-5.08818	3.61508e-07	3.27226e-05
Contig89486	#N/A	0.166774	-15.0806	2.96959	-5.07834	3.80741e-07	3.44195e-05
Contig96591	#N/A	2.00606	-15.0583	2.19561	-6.85835	6.96596e-12	1.34463e-09
Contig137016	ref|XP_011176356.1| PREDICTED: protein transport protein Sec24C [Solenopsis invicta]	6.68437	-15.0493	2.95197	-5.09806	3.43145e-07	3.13011e-05
Contig78050	ref|XP_011868073.1| PREDICTED: dehydrogenase/reductase SDR family member on chromosome X-like [Vollenhovia emeryi]	1.45129	-15.0213	2.95055	-5.09102	3.56147e-07	3.24452e-05
Contig84179	ref|XP_012060738.1| PREDICTED: longitudinals lacking protein, isoforms A/B/D/L [Atta cephalotes]	2.2242	-15.0049	2.94741	-5.09088	3.56415e-07	3.24487e-05
Contig23519	#N/A	0.605212	-14.995	2.95967	-5.06643	4.05349e-07	3.65504e-05
Contig110440	ref|XP_011158109.1| PREDICTED: LOW QUALITY PROTEIN: uncharacterized protein LOC105194736 [Solenopsis invicta]	4.37972	-14.9514	2.95485	-5.05995	4.19373e-07	3.77668e-05
Contig138132	ref|XP_011695879.1| PREDICTED: lipase 3-like [Wasmannia auropunctata]	1.00761	-14.91	2.94904	-5.05589	4.28392e-07	3.85545e-05
Contig80170	ref|XP_011859007.1| PREDICTED: uncharacterized protein LOC105556520 [Vollenhovia emeryi]	1.27586	-14.9057	2.95425	-5.04551	4.52304e-07	4.06547e-05
Contig123450	ref|XP_011691520.1| PREDICTED: solute carrier family 22 member 21-like isoform X3 [Wasmannia auropunctata]	1.60284	-14.8612	2.9569	-5.02594	5.00973e-07	4.48864e-05
Contig97167	ref|XP_011066569.1| PREDICTED: macoilin-1 isoform X1 [Acromyrmex echinatior]	1.20415	-14.8519	2.94785	-5.03821	4.69899e-07	4.21558e-05
Contig73244	#N/A	4.10169	-14.7873	2.9534	-5.00686	5.53264e-07	4.94463e-05
Contig144129	ref|XP_012059313.1| PREDICTED: zinc finger protein 16-like [Atta cephalotes]	2.54882	-14.7642	2.94906	-5.00641	5.54534e-07	4.95284e-05
Contig46640	ref|XP_011708000.1| PREDICTED: HAUS augmin-like complex subunit 3 [Wasmannia auropunctata]	2.84303	-14.7613	2.95295	-4.99885	5.76739e-07	5.14792e-05
Contig109292	#N/A	0.753809	-14.7297	2.25539	-6.53087	6.53906e-11	1.06201e-08
Contig20109	#N/A	0.940588	-14.7167	2.12153	-6.93682	4.01015e-12	8.15284e-10
Contig104697	ref|XP_011684310.1| PREDICTED: uncharacterized protein LOC105447802 [Wasmannia auropunctata]	0.366874	-14.7129	2.95802	-4.97391	6.56161e-07	5.82738e-05
Contig2920	#N/A	0.151175	-14.7069	2.96972	-4.95228	7.33495e-07	6.48565e-05
Contig66936	#N/A	0.151175	-14.7069	2.96972	-4.95228	7.33495e-07	6.48565e-05
Contig46792	#N/A	0.492577	-14.7004	2.95828	-4.96924	6.72173e-07	5.96209e-05
Contig124487	#N/A	0.626877	-14.6971	2.95453	-4.97443	6.54393e-07	5.81533e-05
Contig126799	ref|XP_012522739.1| PREDICTED: OTU domain-containing protein 7B-like [Monomorium pharaonis]	0.884024	-14.6884	2.95576	-4.96942	6.71548e-07	5.96028e-05
Contig138449	ref|XP_011060865.1| PREDICTED: arrestin domain-containing protein 2-like [Acromyrmex echinatior]	2.02497	-14.6823	2.75377	-5.33172	9.72842e-08	9.41723e-06
Contig47665	ref|XP_011868751.1| PREDICTED: rab GTPase-activating protein 1-like isoform X1 [Vollenhovia emeryi]	6.30353	-14.6797	2.95481	-4.96807	6.76229e-07	5.9943e-05
Contig127883	ref|XP_011175572.1| PREDICTED: protein SMG5 [Solenopsis invicta]	0.829581	-14.6677	2.95423	-4.96497	6.87116e-07	6.08699e-05
Contig48139	ref|XP_013309372.1| Actin [Necator americanus]	2.04961	-14.5985	2.95529	-4.93978	7.82107e-07	6.89821e-05
Contig7786	ref|XP_011690880.1| PREDICTED: zinc finger CCCH domain-containing protein 15 homolog [Wasmannia auropunctata]	1.99103	-14.5881	2.95465	-4.93735	7.91912e-07	6.97598e-05
Contig36970	ref|XP_011159419.1| PREDICTED: pleiotropic regulator 1 [Solenopsis invicta]	2.78717	-14.5808	2.95354	-4.93672	7.94468e-07	6.99414e-05
Contig94909	#N/A	0.806262	-14.5761	2.9517	-4.93818	7.88534e-07	6.95056e-05
Contig85836	ref|XP_011684453.1| PREDICTED: uncharacterized protein LOC105447887 [Wasmannia auropunctata]	1.34842	-14.5698	2.92641	-4.97872	6.40078e-07	5.6917e-05
Contig109634	ref|XP_011878526.1| PREDICTED: ectonucleotide pyrophosphatase/phosphodiesterase family member 5-like isoform X1 [Vollenhovia emeryi]	1.75734	-14.5651	2.53326	-5.74957	8.94687e-09	1.04218e-06
Contig147079	ref|XP_003424241.1| PREDICTED: uncharacterized protein LOC100679579 [Nasonia vitripennis]	1.44128	-14.5622	2.95463	-4.92858	8.28276e-07	7.28723e-05
Contig41541	ref|XP_011877585.1| PREDICTED: procollagen-lysine,2-oxoglutarate 5-dioxygenase 3 [Vollenhovia emeryi]	1.91152	-14.5483	2.73764	-5.31415	1.07155e-07	1.02858e-05
Contig105810	ref|XP_011868062.1| PREDICTED: transient receptor potential-gamma protein isoform X2 [Vollenhovia emeryi]	1.4655	-14.5378	2.95284	-4.92333	8.50847e-07	7.4765e-05
Contig136653	#N/A	0.467432	-14.5223	2.95724	-4.91077	9.07186e-07	7.95178e-05
Contig49923	ref|XP_011697214.1| PREDICTED: stromelysin-3-like [Wasmannia auropunctata]	2.01638	-14.512	2.94999	-4.91935	8.68312e-07	7.62523e-05
Contig51616	ref|XP_012063366.1| PREDICTED: DEP domain-containing protein 5 [Atta cephalotes]	1.37317	-14.4759	2.94952	-4.90788	9.20653e-07	8.05982e-05
Contig78144	ref|XP_012061087.1| PREDICTED: zinc finger protein 70-like [Atta cephalotes]	1.881	-14.4047	2.9468	-4.88826	1.01731e-06	8.89502e-05
Contig119903	ref|XP_011170369.1| PREDICTED: uncharacterized protein LOC105203292 [Solenopsis invicta]	0.736374	-14.3981	2.95904	-4.86579	1.14e-06	9.90031e-05
Contig74628	ref|XP_011051793.1| PREDICTED: probable GPI-anchored adhesin-like protein PGA55 isoform X2 [Acromyrmex echinatior]	1.41932	-14.3716	2.95422	-4.86477	1.14591e-06	9.94552e-05
Contig72762	ref|XP_012533484.1| PREDICTED: histone-lysine N-methyltransferase E(z) isoform X1 [Monomorium pharaonis]	3.1956	-14.3519	2.95256	-4.86082	1.16899e-06	0.000101396
Contig70110	ref|XP_011866691.1| PREDICTED: activating signal cointegrator 1 complex subunit 2-like isoform X2 [Vollenhovia emeryi]	0.945727	-14.2863	2.95185	-4.83978	1.29985e-06	0.000112608
Contig133980	#N/A	0.486285	-14.2853	2.81855	-5.0683	4.0139e-07	3.62166e-05
Contig36224	ref|XP_011696939.1| PREDICTED: uncharacterized protein LOC105455363 [Wasmannia auropunctata]	1.57261	-14.2814	2.89029	-4.94118	7.76512e-07	6.85315e-05
Contig134195	ref|XP_011061518.1| PREDICTED: embryonic polyadenylate-binding protein B-like [Acromyrmex echinatior]	0.581216	-14.2738	2.64834	-5.38973	7.05621e-08	6.95758e-06
Contig119674	ref|XP_012538814.1| PREDICTED: putative sodium-dependent multivitamin transporter [Monomorium pharaonis]	0.939713	-14.2727	2.95578	-4.82874	1.37401e-06	0.000118742
Contig101434	ref|XP_013192167.1| PREDICTED: myb-related transcription factor, partner of profilin [Amyelois transitella]	1.41096	-14.2716	2.95192	-4.83468	1.33359e-06	0.00011532
Contig36916	#N/A	7.24755	-14.2578	2.95676	-4.82209	1.42062e-06	0.00012262
Contig100091	#N/A	0.36613	-14.1908	2.95843	-4.79675	1.61261e-06	0.000138768
Contig78380	ref|XP_011702564.1| PREDICTED: glycogen [starch] synthase [Wasmannia auropunctata]	2.25335	-14.1608	2.9528	-4.79573	1.62085e-06	0.000139307
Contig89370	ref|XP_012538725.1| PREDICTED: sialin-like isoform X1 [Monomorium pharaonis]	1.26258	-14.1496	2.9518	-4.79353	1.63868e-06	0.000140754
Contig118865	ref|XP_011642346.1| PREDICTED: LOW QUALITY PROTEIN: uncharacterized protein LOC105430465 [Pogonomyrmex barbatus]	0.895254	-14.1443	2.949	-4.7963	1.6162e-06	0.000138992
Contig74000	ref|XP_011882275.1| PREDICTED: uncharacterized protein C18orf8 [Vollenhovia emeryi]	1.13162	-14.1339	2.45786	-5.75052	8.89719e-09	1.03725e-06
Contig67857	ref|XP_011858612.1| PREDICTED: putative nuclease HARBI1 isoform X1 [Vollenhovia emeryi]	15.2117	-14.126	2.95178	-4.7856	1.70479e-06	0.000146255
Contig3596	ref|XP_012064464.1| PREDICTED: anoctamin-4 [Atta cephalotes]	1.37325	-14.0706	2.95687	-4.75859	1.94946e-06	0.000166236
Contig66879	ref|XP_011049413.1| PREDICTED: multidrug resistance-associated protein 1 isoform X1 [Acromyrmex echinatior]	1.07905	-14.068	2.94973	-4.76925	1.84915e-06	0.000158255
Contig132689	ref|XP_012526984.1| PREDICTED: GRAM domain-containing protein 1B-like [Monomorium pharaonis]	2.5332	-14.0056	2.63958	-5.30599	1.12065e-07	1.07353e-05
Contig55215	ref|XP_011167694.1| PREDICTED: protein brunelleschi isoform X3 [Solenopsis invicta]	1.77286	-14.0021	2.95329	-4.74118	2.12473e-06	0.000180311
Contig81105	#N/A	0.769367	-14.0016	2.95583	-4.73696	2.16953e-06	0.000183782
Contig115879	ref|XP_011156130.1| PREDICTED: epidermal growth factor receptor-like [Solenopsis invicta]	1.15823	-14.0006	2.07619	-6.74339	1.54729e-11	2.79933e-09
Contig73049	ref|XP_012539938.1| PREDICTED: DCN1-like protein 1 [Monomorium pharaonis]	1.62136	-13.991	2.95191	-4.73965	2.14084e-06	0.000181569
Contig74594	ref|XP_011642049.1| PREDICTED: PP2C-like domain-containing protein CG9801 isoform X3 [Pogonomyrmex barbatus]	1.44098	-13.9855	2.95616	-4.73096	2.23464e-06	0.000189071
Contig131141	ref|XP_011162040.1| PREDICTED: ammonium transporter 1 member 3-like [Solenopsis invicta]	0.278301	-13.9809	2.96383	-4.71716	2.3916e-06	0.000201746
Contig119304	ref|XP_012540649.1| PREDICTED: neogenin isoform X5 [Monomorium pharaonis]	7.00999	-13.9787	2.9445	-4.74739	2.06059e-06	0.000175079
Contig56179	ref|XP_011058455.1| PREDICTED: uncharacterized protein LOC105148435 [Acromyrmex echinatior]	0.552659	-13.9703	2.95401	-4.72928	2.25313e-06	0.000190407
Contig116123	ref|XP_011157574.1| PREDICTED: uncharacterized protein LOC105194390 [Solenopsis invicta]	0.637468	-13.9616	2.96244	-4.71287	2.44252e-06	0.000205673
Contig121366	ref|XP_011859770.1| PREDICTED: putative ATP-dependent RNA helicase TDRD12 [Vollenhovia emeryi]	1.12507	-13.9538	2.95027	-4.72967	2.24882e-06	0.000190157
Contig137608	ref|XP_014609021.1| PREDICTED: nuclear factor 1 X-type isoform X3 [Polistes canadensis]	1.17642	-13.9512	2.95595	-4.71969	2.36202e-06	0.00019937
Contig100307	ref|XP_011159048.1| PREDICTED: L-galactose dehydrogenase-like isoform X1 [Solenopsis invicta]	1.9204	-13.9358	2.95575	-4.71481	2.41931e-06	0.000203841
Contig85568	#N/A	0.563444	-13.9341	2.95818	-4.71035	2.47288e-06	0.000208106
Contig46682	ref|XP_011703274.1| PREDICTED: hemicentin-2 isoform X1 [Wasmannia auropunctata]	2.4163	-13.9115	2.95704	-4.70456	2.54417e-06	0.000213597
Contig121576	#N/A	0.248171	-13.884	2.96235	-4.68682	2.77481e-06	0.000232408
Contig22183	ref|XP_011686973.1| PREDICTED: guanylate cyclase 32E isoform X1 [Wasmannia auropunctata]	1.07164	-13.8709	2.95246	-4.69807	2.62625e-06	0.000220226
Contig99177	#N/A	0.760257	-13.8545	2.95445	-4.68937	2.74048e-06	0.000229668
Contig139021	#N/A	0.840294	-13.8177	2.96032	-4.66765	3.04666e-06	0.000254724
Contig63018	#N/A	1.28204	-13.7965	2.95659	-4.66637	3.06575e-06	0.000256017
Contig39321	ref|XP_012538360.1| PREDICTED: uncharacterized protein LOC105837813 [Monomorium pharaonis]	3.08577	-13.7857	2.01743	-6.8333	8.29805e-12	1.5696e-09
Contig147873	ref|XP_008218055.1| PREDICTED: uncharacterized protein LOC103318189 isoform X2 [Nasonia vitripennis]	0.372421	-13.7524	2.96074	-4.64493	3.40194e-06	0.000282755
Contig113092	ref|XP_011160183.1| PREDICTED: protein kinase C isoform X1 [Solenopsis invicta]	1.57962	-13.7516	2.76115	-4.98041	6.34511e-07	5.6493e-05
Contig42849	ref|XP_012226112.1| PREDICTED: protein hu-li tai shao isoform X3 [Linepithema humile]	2.01723	-13.75	2.95319	-4.65597	3.22453e-06	0.0002688
Contig38848	#N/A	0.582941	-13.7477	2.95929	-4.64559	3.391e-06	0.000282012
Contig10580	ref|XP_012537199.1| PREDICTED: kelch domain-containing protein 4 isoform X2 [Monomorium pharaonis]	0.464488	-13.7295	2.95209	-4.65078	3.30689e-06	0.000275341
Contig124004	ref|XP_012223976.1| PREDICTED: LOW QUALITY PROTEIN: transient receptor potential cation channel protein painless [Linepithema humile]	1.14248	-13.6697	2.94843	-4.63627	3.5475e-06	0.000293644
Contig61132	ref|XP_011874240.1| PREDICTED: solute carrier family 12 member 7 isoform X1 [Vollenhovia emeryi]	4.05438	-13.6666	2.74068	-4.98659	6.14549e-07	5.47848e-05
Contig37683	ref|XP_011876001.1| PREDICTED: SWI/SNF-related matrix-associated actin-dependent regulator of chromatin subfamily A-like protein 1 [Vollenhovia emeryi]	1.39504	-13.6268	2.95176	-4.6165	3.90268e-06	0.00032079
Contig81924	#N/A	0.341605	-13.5937	2.96059	-4.59154	4.39993e-06	0.000358332
Contig101529	ref|XP_011874117.1| PREDICTED: rac GTPase-activating protein 1-like [Vollenhovia emeryi]	0.830085	-13.588	2.95179	-4.60331	4.15835e-06	0.000340418
Contig147223	ref|XP_013200965.1| PREDICTED: glyceraldehyde-3-phosphate dehydrogenase 2 [Amyelois transitella]	1.21848	-13.5836	2.95647	-4.59455	4.33683e-06	0.000354286
Contig138172	ref|XP_011871364.1| PREDICTED: huntingtin-interacting protein 1 [Vollenhovia emeryi]	2.72971	-13.5832	2.95326	-4.5994	4.23719e-06	0.000346472
Contig33939	#N/A	0.578558	-13.571	2.96169	-4.58219	4.60135e-06	0.000374084
Contig128050	ref|XP_012528810.1| PREDICTED: uncharacterized protein LOC105832434 [Monomorium pharaonis]	0.514033	-13.564	2.95988	-4.58261	4.59203e-06	0.000373541
Contig87484	#N/A	0.816879	-13.5636	2.95404	-4.59153	4.4e-06	0.000358332
Contig121845	#N/A	0.678865	-13.5516	2.95682	-4.58317	4.57977e-06	0.000372758
Contig10386	ref|XP_012540705.1| PREDICTED: V-type proton ATPase subunit d [Monomorium pharaonis]	1.32658	-13.5093	2.9501	-4.57926	4.66625e-06	0.000379141
Contig54532	#N/A	0.435905	-13.4838	2.96035	-4.5548	5.24358e-06	0.000421446
Contig148903	#N/A	0.577967	-13.4651	2.95665	-4.55417	5.25917e-06	0.000422219
Contig97100	#N/A	1.08559	-13.4618	2.95078	-4.56213	5.06365e-06	0.000407913
Contig146176	ref|XP_011685003.1| PREDICTED: uncharacterized protein LOC105448237 [Wasmannia auropunctata]	2.00686	-13.4433	2.95615	-4.54757	5.42685e-06	0.000434201
Contig136817	ref|XP_011171881.1| PREDICTED: uncharacterized protein LOC105204491, partial [Solenopsis invicta]	1.69864	-13.4428	2.95623	-4.54726	5.43478e-06	0.000434589
Contig140659	#N/A	0.327835	-13.4404	2.96008	-4.54054	5.611e-06	0.000447414
Contig98896	#N/A	0.679632	-13.4156	2.9531	-4.54289	5.54879e-06	0.000442954
Contig114115	#N/A	0.866185	-13.3974	2.94587	-4.54786	5.41952e-06	0.00043386
Contig21147	ref|XP_011068655.1| PREDICTED: ras GTPase-activating protein-binding protein 2 isoform X1 [Acromyrmex echinatior]	1.06278	-13.3949	2.95716	-4.52965	5.90813e-06	0.000467938
Contig72398	#N/A	2.07448	-13.3903	2.95817	-4.52655	5.99552e-06	0.000474327
Contig122363	ref|XP_011879066.1| PREDICTED: aminopeptidase N-like isoform X1 [Vollenhovia emeryi]	2.54318	-13.3819	2.95293	-4.53174	5.85002e-06	0.000464116
Contig34280	ref|XP_012235316.1| PREDICTED: ABC transporter H family member 2-like [Linepithema humile]	2.27623	-13.3698	2.96058	-4.51596	6.30319e-06	0.000497276
Contig104504	#N/A	0.336453	-13.3503	2.9632	-4.50535	6.62637e-06	0.000519313
Contig56830	#N/A	0.822017	-13.3499	2.95525	-4.51735	6.26191e-06	0.000494296
Contig103526	#N/A	0.23467	-13.3315	2.96294	-4.49943	6.81346e-06	0.000532773
Contig46906	ref|XP_011883916.1| PREDICTED: uncharacterized protein LOC105571054 isoform X2 [Vollenhovia emeryi]	1.87848	-13.3213	2.9532	-4.51081	6.45818e-06	0.00050752
Contig105292	ref|XP_011707950.1| PREDICTED: uncharacterized protein LOC105462798 [Wasmannia auropunctata]	4.16464	-13.3197	2.95643	-4.50534	6.62662e-06	0.000519313
Contig54291	ref|XP_011865747.1| PREDICTED: trafficking protein particle complex subunit 11 [Vollenhovia emeryi]	1.93539	-13.3	2.37782	-5.59336	2.22719e-08	2.44139e-06
Contig121255	ref|XP_011861842.1| PREDICTED: transmembrane and TPR repeat-containing protein 4 isoform X1 [Vollenhovia emeryi]	4.5548	-13.2979	2.95207	-4.50462	6.64933e-06	0.000520804
Contig35788	ref|XP_011696594.1| PREDICTED: lutropin-choriogonadotropic hormone receptor isoform X1 [Wasmannia auropunctata]	1.14144	-13.2527	2.9493	-4.49351	7.00585e-06	0.000546607
Contig76157	#N/A	0.284324	-13.2474	2.96288	-4.47114	7.78042e-06	0.000601066
Contig109358	ref|XP_011171682.1| PREDICTED: uncharacterized protein LOC105204332, partial [Solenopsis invicta]	0.455576	-13.2414	2.95765	-4.47701	7.56953e-06	0.000586699
Contig5499	ref|XP_011861492.1| PREDICTED: dynein intermediate chain 2, axonemal [Vollenhovia emeryi]	0.960714	-13.2384	2.94874	-4.48952	7.13848e-06	0.000555116
Contig141442	ref|XP_014477733.1| PREDICTED: cyclin-dependent kinase 10 isoform X2 [Dinoponera quadriceps]	1.79541	-13.2328	2.8645	-4.61956	3.84546e-06	0.000316454
Contig55270	ref|XP_011052212.1| PREDICTED: uncharacterized protein LOC105144763 isoform X4 [Acromyrmex echinatior]	0.562388	-13.2112	2.95307	-4.4737	7.68769e-06	0.000594553
Contig107824	#N/A	0.561908	-13.1937	2.95907	-4.45873	8.2447e-06	0.000633814
Contig144099	ref|XP_011702564.1| PREDICTED: glycogen [starch] synthase [Wasmannia auropunctata]	1.27337	-13.1909	2.96115	-4.45465	8.40319e-06	0.000644246
Contig136839	ref|XP_011633500.1| PREDICTED: la-related protein 6 isoform X3 [Pogonomyrmex barbatus]	0.617704	-13.1855	2.95342	-4.46448	8.02639e-06	0.000619053
Contig16866	#N/A	0.604344	-13.1828	2.95782	-4.45692	8.31455e-06	0.000638143
Contig31290	ref|XP_011643532.1| PREDICTED: LOW QUALITY PROTEIN: uncharacterized protein LOC105431194 [Pogonomyrmex barbatus]	0.622682	-13.1595	2.69903	-4.87565	1.08452e-06	9.44177e-05
Contig110591	ref|XP_012224668.1| PREDICTED: maltase 1-like [Linepithema humile]	3.0158	-13.1413	2.94704	-4.45914	8.22875e-06	0.000632933
Contig93703	ref|XP_011700651.1| PREDICTED: cytochrome P450 6k1-like isoform X3 [Wasmannia auropunctata]	0.466981	-13.1262	2.95563	-4.44108	8.95087e-06	0.000683771
Contig41292	#N/A	0.7494	-13.109	2.95879	-4.43052	9.40074e-06	0.000713371
Contig36670	#N/A	0.444078	-13.1008	2.96243	-4.42231	9.76528e-06	0.000737864
Contig140397	#N/A	0.65815	-13.0977	2.96129	-4.42298	9.73485e-06	0.000736597
Contig93704	ref|XP_011875036.1| PREDICTED: cytochrome P450 6k1-like isoform X4 [Vollenhovia emeryi]	0.736443	-13.0717	2.9533	-4.42615	9.59312e-06	0.000726799
Contig116632	ref|XP_015588059.1| PREDICTED: knirps-related protein-like isoform X1 [Cephus cinctus]	1.21644	-13.0604	2.96137	-4.41027	1.03241e-05	0.000775523
Contig76718	#N/A	0.459462	-13.0374	2.95613	-4.41028	1.03236e-05	0.000775523
Contig129808	ref|XP_011707478.1| PREDICTED: uncharacterized protein LOC105462524 [Wasmannia auropunctata]	0.718333	-13.0109	2.96053	-4.39479	1.10878e-05	0.000825002
Contig51137	ref|XP_012234496.1| PREDICTED: uncharacterized protein LOC105679183 isoform X1 [Linepithema humile]	1.35606	-13.0049	2.94501	-4.41592	1.0058e-05	0.000757558
Contig129055	ref|XP_011859583.1| PREDICTED: uncharacterized protein YER152C-like isoform X1 [Vollenhovia emeryi]	1.26721	-12.9991	2.95901	-4.39308	1.11755e-05	0.000830652
Contig92927	ref|XP_011870938.1| PREDICTED: uncharacterized protein KIAA1109 isoform X5 [Vollenhovia emeryi]	4.28132	-12.9805	2.9528	-4.39599	1.1027e-05	0.000820911
Contig75718	ref|XP_012224113.1| PREDICTED: LOW QUALITY PROTEIN: Bardet-Biedl syndrome 5 protein homolog [Linepithema humile]	0.694354	-12.9607	2.95466	-4.38653	1.15174e-05	0.000854568
Contig131089	ref|XP_011644821.1| PREDICTED: transcription factor Sox-2-like isoform X4 [Pogonomyrmex barbatus]	0.724593	-12.9531	2.23113	-5.80563	6.41234e-09	7.60105e-07
Contig149501	#N/A	0.575126	-12.9528	2.96346	-4.37084	1.23771e-05	0.000911335
Contig80965	#N/A	0.749144	-12.9295	2.9522	-4.37963	1.18882e-05	0.00087992
Contig50029	ref|XP_011693535.1| PREDICTED: GTP cyclohydrolase 1 isoform X1 [Wasmannia auropunctata]	0.521719	-12.9286	2.95951	-4.36849	1.25106e-05	0.000918842
Contig104734	#N/A	0.707886	-12.9257	2.95883	-4.36852	1.25093e-05	0.000918842
Contig27254	ref|XP_012531032.1| PREDICTED: uncharacterized protein LOC105833673 [Monomorium pharaonis]	0.530569	-12.9202	2.95739	-4.36881	1.24928e-05	0.000918842
Contig93181	#N/A	0.86763	-12.9011	2.63917	-4.8883	1.01709e-06	8.89502e-05
Contig56086	#N/A	0.746804	-12.9009	2.95628	-4.36389	1.2777e-05	0.000935419
Contig22047	#N/A	0.42687	-12.8852	2.96233	-4.34967	1.36344e-05	0.000990998
Contig86383	#N/A	0.930365	-12.8843	2.95304	-4.36308	1.28247e-05	0.00093842
Contig102066	#N/A	0.759665	-12.8695	2.95729	-4.35178	1.35035e-05	0.000982883
Contig149533	#N/A	0.585641	-12.8601	2.95425	-4.35309	1.34232e-05	0.000978665
Contig54414	#N/A	0.735505	-12.8586	2.9535	-4.35367	1.33874e-05	0.000976563
Contig26738	ref|XP_011687884.1| PREDICTED: gamma-glutamyltranspeptidase 1-like [Wasmannia auropunctata]	0.98672	-12.8486	2.95215	-4.35227	1.34732e-05	0.000981304
Contig95191	ref|XP_012532713.1| PREDICTED: Bardet-Biedl syndrome 7 protein homolog [Monomorium pharaonis]	1.41147	-12.8358	2.95662	-4.34136	1.41603e-05	0.00102605
Contig39452	#N/A	0.554244	-12.8332	2.9563	-4.34097	1.41853e-05	0.00102704
Contig74799	ref|XP_011700718.1| PREDICTED: tyramine beta-hydroxylase [Wasmannia auropunctata]	0.594823	-12.8077	2.95498	-4.33428	1.4624e-05	0.00105532
Contig92469	#N/A	0.497776	-12.8069	2.95519	-4.33371	1.46616e-05	0.00105642
Contig77825	ref|XP_011864282.1| PREDICTED: DENN domain-containing protein 1A isoform X1 [Vollenhovia emeryi]	1.97025	-12.8037	2.9532	-4.33553	1.45411e-05	0.00105041
Contig146846	#N/A	0.342798	-12.8009	2.96224	-4.32135	1.55079e-05	0.00111173
Contig79851	ref|XP_011871726.1| PREDICTED: cytochrome P450 4c21-like [Vollenhovia emeryi]	1.13088	-12.7968	2.95977	-4.32359	1.53511e-05	0.00110216
Contig86456	#N/A	0.345037	-12.7959	2.96294	-4.31867	1.56971e-05	0.00112415
Contig113765	ref|XP_011867503.1| PREDICTED: uncharacterized protein LOC105561796 isoform X2 [Vollenhovia emeryi]	2.72787	-12.789	2.68052	-4.77109	1.83227e-06	0.000156906
Contig122269	ref|XP_011876579.1| PREDICTED: uncharacterized protein LOC105566844 [Vollenhovia emeryi]	0.998997	-12.7802	2.96054	-4.31684	1.58279e-05	0.0011318
Contig121628	ref|XP_012530808.1| PREDICTED: zinc finger protein 431-like [Monomorium pharaonis]	8.91709	-12.7751	2.66281	-4.79761	1.6057e-06	0.000138258
Contig21295	#N/A	0.618298	-12.7737	2.95629	-4.32086	1.5542e-05	0.00111361
Contig3866	ref|XP_011883524.1| PREDICTED: solute carrier family 25 member 40-like isoform X1 [Vollenhovia emeryi]	2.19415	-12.7546	2.38713	-5.34308	9.13794e-08	8.89844e-06
Contig16418	ref|XP_017093276.1| PREDICTED: 2',3'-cyclic-nucleotide 2'-phosphodiesterase/3'-nucleotidase-like [Drosophila bipectinata]	0.763733	-12.7516	2.95796	-4.31094	1.62562e-05	0.00116125
Contig94024	#N/A	0.67076	-12.7483	2.95299	-4.31708	1.58106e-05	0.00113113
Contig13708	ref|XP_015594147.1| PREDICTED: uncharacterized protein LOC107267231 [Cephus cinctus]	0.660406	-12.7479	2.95973	-4.30712	1.65396e-05	0.00117971
Contig73889	#N/A	0.344732	-12.7478	2.96378	-4.30119	1.69885e-05	0.00120698
Contig131462	#N/A	0.680392	-12.7152	2.95738	-4.29947	1.71206e-05	0.00121562
Contig110052	ref|XP_011874487.1| PREDICTED: serine/threonine-protein kinase 11-interacting protein isoform X2 [Vollenhovia emeryi]	0.821135	-12.7115	2.95336	-4.30407	1.67692e-05	0.00119428
Contig85864	ref|XP_014229558.1| PREDICTED: uncharacterized protein LOC106654278 [Trichogramma pretiosum]	2.551	-12.7114	2.95534	-4.30116	1.69903e-05	0.00120698
Contig55322	ref|XP_012235691.1| PREDICTED: uncharacterized protein LOC105679930 [Linepithema humile]	1.0491	-12.709	2.9589	-4.29517	1.74563e-05	0.00123821
Contig128685	ref|XP_011175070.1| PREDICTED: craniofacial development protein 2-like [Solenopsis invicta]	0.670379	-12.6964	2.95105	-4.30233	1.69015e-05	0.00120188
Contig92229	ref|XP_012339113.1| PREDICTED: alpha-actinin, sarcomeric-like isoform X2 [Apis florea]	0.342042	-12.6869	2.96084	-4.2849	1.82822e-05	0.0012942
Contig88218	ref|XP_011701488.1| PREDICTED: uncharacterized protein LOC105458119 [Wasmannia auropunctata]	0.516803	-12.6704	2.95594	-4.28643	1.81565e-05	0.00128594
Contig79427	#N/A	0.28358	-12.6608	2.96136	-4.27533	1.90856e-05	0.00134888
Contig70495	#N/A	0.525299	-12.6463	2.95802	-4.27524	1.90928e-05	0.00134888
Contig7781	ref|XP_011057317.1| PREDICTED: monoacylglycerol lipase ABHD12 isoform X3 [Acromyrmex echinatior]	1.4287	-12.6401	2.96085	-4.26906	1.96297e-05	0.00138404
Contig81298	#N/A	0.50592	-12.623	2.95928	-4.26556	1.99403e-05	0.00140454
Contig86395	ref|XP_012055376.1| PREDICTED: peroxisomal hydratase-dehydrogenase-epimerase-like [Atta cephalotes]	0.46499	-12.6085	2.9592	-4.26078	2.03711e-05	0.00143274
Contig77896	ref|XP_011858995.1| PREDICTED: uncharacterized protein LOC105556507 [Vollenhovia emeryi]	0.431743	-12.6018	2.95841	-4.25967	2.04731e-05	0.00143848
Contig14606	ref|XP_011065794.1| PREDICTED: probable nuclear hormone receptor HR3 isoform X2 [Acromyrmex echinatior]	0.69948	-12.5794	2.95818	-4.2524	2.1149e-05	0.00148376
Contig38531	ref|XP_011061704.1| PREDICTED: katanin p60 ATPase-containing subunit A-like 2 [Acromyrmex echinatior]	0.327044	-12.5774	2.95894	-4.25063	2.13167e-05	0.00149478
Contig89366	#N/A	0.613378	-12.5711	2.95109	-4.25984	2.04575e-05	0.0014381
Contig137892	ref|XP_011699645.1| PREDICTED: pickpocket protein 28-like [Wasmannia auropunctata]	0.348419	-12.5662	2.95895	-4.24683	2.16819e-05	0.00151877
Contig29389	#N/A	1.38804	-12.5492	2.95628	-4.24493	2.18661e-05	0.00152875
Contig68613	ref|XP_012055196.1| PREDICTED: mitochondrial ribosome-associated GTPase 2 [Atta cephalotes]	1.66737	-12.5438	1.843	-6.80617	1.00231e-11	1.87332e-09
Contig109220	#N/A	0.345041	-12.5386	2.95941	-4.23685	2.2668e-05	0.00158091
Contig74599	ref|XP_012526170.1| PREDICTED: alpha-1,6-mannosyl-glycoprotein 2-beta-N-acetylglucosaminyltransferase isoform X2 [Monomorium pharaonis]	2.13689	-12.5374	2.95302	-4.24562	2.17987e-05	0.00152555
Contig5635	#N/A	0.41761	-12.529	2.95762	-4.23617	2.27361e-05	0.00158487
Contig100429	ref|XP_011872040.1| PREDICTED: uncharacterized protein LOC105564342 [Vollenhovia emeryi]	4.93334	-12.528	2.94765	-4.25015	2.13624e-05	0.00149724
Contig26526	ref|XP_012227119.1| PREDICTED: uncharacterized protein PF11_0213-like [Linepithema humile]	2.23974	-12.5277	2.95766	-4.23567	2.27869e-05	0.00158764
Contig65251	#N/A	0.516107	-12.5276	2.95483	-4.23971	2.23807e-05	0.00156164
Contig141755	#N/A	1.17191	-12.5157	2.96138	-4.2263	2.37565e-05	0.0016495
Contig110609	ref|XP_011050668.1| PREDICTED: UPF0160 protein MYG1, mitochondrial [Acromyrmex echinatior]	0.940757	-12.5094	2.96153	-4.22396	2.40042e-05	0.00166506
Contig138074	ref|XP_011861727.1| PREDICTED: uncharacterized protein LOC105558579 [Vollenhovia emeryi]	1.67332	-12.498	2.956	-4.228	2.35773e-05	0.00163934
Contig15984	ref|XP_012539622.1| PREDICTED: tubulin epsilon chain-like isoform X2 [Monomorium pharaonis]	0.789742	-12.4949	2.96128	-4.21941	2.44945e-05	0.00169136
Contig16225	#N/A	0.583312	-12.4822	2.95233	-4.22791	2.3587e-05	0.00163934
Contig85308	#N/A	0.384033	-12.48	2.96044	-4.21558	2.49136e-05	0.00171886
Contig9923	#N/A	0.491297	-12.4755	2.95568	-4.22086	2.43377e-05	0.00168241
Contig11469	ref|XP_011860245.1| PREDICTED: uncharacterized protein LOC105557580 isoform X2 [Vollenhovia emeryi]	34.4545	-12.4733	2.94119	-4.2409	2.22622e-05	0.00155491
Contig8705	ref|XP_011864104.1| PREDICTED: proton-coupled amino acid transporter 1-like isoform X1 [Vollenhovia emeryi]	2.31029	-12.4686	2.95306	-4.22227	2.41852e-05	0.0016735
Contig60088	ref|XP_011872619.1| PREDICTED: alkylglycerol monooxygenase-like isoform X1 [Vollenhovia emeryi]	1.70607	-12.4599	2.95306	-4.21933	2.4503e-05	0.00169136
Contig52959	#N/A	0.43403	-12.4568	2.95739	-4.2121	2.53012e-05	0.00174389
Contig57837	ref|XP_011635328.1| PREDICTED: LOW QUALITY PROTEIN: uncharacterized protein LOC105425982 [Pogonomyrmex barbatus]	0.791773	-12.4482	2.95894	-4.20698	2.58806e-05	0.00178035
Contig49667	#N/A	0.544564	-12.4468	2.95879	-4.20673	2.59095e-05	0.00178061
Contig39284	ref|XP_011700172.1| PREDICTED: uncharacterized protein LOC105457277 isoform X2 [Wasmannia auropunctata]	1.29765	-12.4243	2.95454	-4.20516	2.60901e-05	0.00179215
Contig69887	ref|XP_011155558.1| PREDICTED: eukaryotic translation initiation factor 4 gamma 3-like [Solenopsis invicta]	0.525058	-12.4185	2.95639	-4.20057	2.66238e-05	0.00182615
Contig102104	#N/A	0.472867	-12.4105	2.96309	-4.18835	2.80989e-05	0.00192359
Contig122791	ref|XP_011863149.1| PREDICTED: uncharacterized protein LOC105559464 [Vollenhovia emeryi]	0.4632	-12.4089	2.96313	-4.18777	2.8171e-05	0.00192759
Contig72399	#N/A	1.32855	-12.407	2.95891	-4.19311	2.75159e-05	0.00188459
Contig105067	ref|XP_011053370.1| PREDICTED: GRIP and coiled-coil domain-containing protein 1-like isoform X1 [Acromyrmex echinatior]	1.20416	-12.3963	2.95358	-4.19705	2.70414e-05	0.0018537
Contig52458	#N/A	0.411566	-12.388	2.96408	-4.17939	2.92298e-05	0.00199136
Contig31301	#N/A	0.338496	-12.3856	2.96378	-4.179	2.92794e-05	0.00199282
Contig141125	ref|XP_011696169.1| PREDICTED: leukotriene A-4 hydrolase [Wasmannia auropunctata]	3.56253	-12.379	2.96327	-4.17746	2.94783e-05	0.00200442
Contig95605	#N/A	0.346197	-12.374	2.95962	-4.18096	2.90284e-05	0.0019797
Contig131756	#N/A	0.298974	-12.374	2.96069	-4.17945	2.9222e-05	0.00199136
Contig96688	#N/A	0.433053	-12.3736	2.96107	-4.17876	2.93108e-05	0.001994
Contig95001	ref|XP_012532841.1| PREDICTED: UPF0193 protein EVG1 homolog [Monomorium pharaonis]	0.494125	-12.3689	2.95677	-4.18326	2.87363e-05	0.00196342
Contig147784	ref|XP_012345296.1| PREDICTED: collagen alpha chain CG42342-like isoform X12 [Apis florea]	0.334953	-12.3672	2.95932	-4.17907	2.92708e-05	0.00199282
Contig41813	ref|XP_011688124.1| PREDICTED: progestin and adipoQ receptor family member 4 [Wasmannia auropunctata]	1.47642	-12.3565	2.95351	-4.18366	2.86852e-05	0.00196088
Contig91648	ref|XP_011874188.1| PREDICTED: uncharacterized protein LOC105565527 [Vollenhovia emeryi]	5.28628	-12.352	1.72863	-7.14556	8.96296e-13	2.12847e-10
Contig58082	ref|XP_011637301.1| PREDICTED: uncharacterized protein LOC105427333 [Pogonomyrmex barbatus]	0.638903	-12.3492	2.95717	-4.17602	2.96651e-05	0.00201519
Contig139266	#N/A	0.367768	-12.3326	2.95979	-4.16673	3.09e-05	0.00209404
Contig30339	#N/A	0.598562	-12.3199	2.9586	-4.16411	3.12575e-05	0.00211725
Contig61013	ref|XP_011875539.1| PREDICTED: U2 snRNP-associated SURP motif-containing protein isoform X3 [Vollenhovia emeryi]	0.67674	-12.3176	2.95581	-4.16726	3.08286e-05	0.00209021
Contig140016	#N/A	0.319075	-12.3023	2.96137	-4.15424	3.26365e-05	0.00220538
Contig33479	ref|XP_011636122.1| PREDICTED: G-protein coupled receptor Mth2-like isoform X3 [Pogonomyrmex barbatus]	0.942692	-12.3002	2.95675	-4.16004	3.18198e-05	0.00215328
Contig104638	#N/A	0.842063	-12.2971	2.9583	-4.15682	3.22709e-05	0.00218276
Contig58041	#N/A	0.59306	-12.2887	2.95792	-4.15451	3.25992e-05	0.00220391
Contig75722	ref|XP_011874653.1| PREDICTED: Bardet-Biedl syndrome 5 protein homolog [Vollenhovia emeryi]	1.50566	-12.2818	2.95739	-4.15291	3.28272e-05	0.00221508
Contig129174	ref|XP_012533032.1| PREDICTED: regulating synaptic membrane exocytosis protein 2 isoform X2 [Monomorium pharaonis]	2.0756	-12.2817	2.95713	-4.15323	3.27816e-05	0.00221306
Contig117871	ref|XP_011686466.1| PREDICTED: probable cytosolic Fe-S cluster assembly factor CPIJ010948 isoform X1 [Wasmannia auropunctata]	2.47931	-12.2741	2.95571	-4.15268	3.28601e-05	0.00221625
Contig37900	#N/A	0.441037	-12.2645	2.9595	-4.14412	3.41126e-05	0.00229306
Contig29201	#N/A	0.557968	-12.2533	2.95696	-4.1439	3.41453e-05	0.00229408
Contig2799	#N/A	1.88706	-12.2431	2.95498	-4.14323	3.42447e-05	0.00229757
Contig127323	#N/A	1.13326	-12.2303	2.95708	-4.13593	3.53517e-05	0.00236846
Contig74827	ref|XP_011168766.1| PREDICTED: nose resistant to fluoxetine protein 6-like isoform X2 [Solenopsis invicta]	0.627421	-12.213	2.95887	-4.12758	3.66605e-05	0.0024515
Contig59677	#N/A	0.603317	-12.2093	2.95751	-4.12823	3.65562e-05	0.00244684
Contig92485	ref|XP_011874230.1| PREDICTED: F-box/WD repeat-containing protein 9-like [Vollenhovia emeryi]	0.418904	-12.2003	2.95943	-4.1225	3.74776e-05	0.00250259
Contig89684	ref|XP_011707808.1| PREDICTED: 1-phosphatidylinositol 4,5-bisphosphate phosphodiesterase [Wasmannia auropunctata]	0.845649	-12.1994	2.95532	-4.12795	3.66015e-05	0.00244871
Contig109137	#N/A	0.50509	-12.192	2.95736	-4.12258	3.74651e-05	0.00250259
Contig111512	#N/A	0.453649	-12.1834	2.95857	-4.11801	3.82155e-05	0.00254225
Contig62537	ref|XP_011160899.1| PREDICTED: uncharacterized protein LOC105196580 [Solenopsis invicta]	0.298297	-12.1824	2.9647	-4.10917	3.97085e-05	0.00263784
Contig58008	#N/A	0.501851	-12.1776	2.95476	-4.12134	3.76675e-05	0.00251408
Contig139002	#N/A	0.394897	-12.1742	2.9592	-4.114	3.8886e-05	0.00258563
Contig117566	#N/A	0.495342	-12.17	2.96213	-4.10852	3.98197e-05	0.00264191
Contig66952	ref|XP_011877076.1| PREDICTED: uncharacterized protein LOC105567114 isoform X1 [Vollenhovia emeryi]	1.34721	-12.1697	2.95427	-4.11935	3.79942e-05	0.0025311
Contig36662	ref|XP_014226774.1| PREDICTED: uncharacterized protein LOC106652360 isoform X1 [Trichogramma pretiosum]	0.560392	-12.1549	2.9623	-4.10321	4.0745e-05	0.00269403
Contig131022	ref|XP_012228838.1| PREDICTED: kinesin-like protein KIF14 isoform X1 [Linepithema humile]	0.317564	-12.1546	2.9605	-4.1056	4.0326e-05	0.00267007
Contig11735	#N/A	0.546169	-12.1537	2.95657	-4.11075	3.94384e-05	0.00262113
Contig124925	#N/A	0.5243	-12.148	2.9568	-4.10849	3.98258e-05	0.00264191
Contig11668	ref|XP_015591437.1| PREDICTED: disks large 1 tumor suppressor protein isoform X17 [Cephus cinctus]	0.689421	-12.1472	2.95783	-4.10679	4.01198e-05	0.00265767
Contig9838	ref|XP_015378351.1| PREDICTED: uncharacterized protein LOC107172574 [Diuraphis noxia]	1.67405	-12.1411	2.95588	-4.10745	4.00059e-05	0.00265137
Contig62485	#N/A	0.423288	-12.1303	2.95534	-4.10453	4.05132e-05	0.00268121
Contig94778	ref|XP_011882030.1| PREDICTED: aminopeptidase N-like isoform X2 [Vollenhovia emeryi]	1.75158	-12.13	2.96313	-4.09365	4.24641e-05	0.00280115
Contig147018	#N/A	9.03841	-12.1267	2.94399	-4.11912	3.80324e-05	0.00253245
Contig142507	#N/A	0.445268	-12.1235	2.95849	-4.09786	4.16987e-05	0.00275323
Contig42645	ref|XP_011860409.1| PREDICTED: uncharacterized protein LOC105557704 [Vollenhovia emeryi]	1.48975	-12.1226	2.95805	-4.09817	4.16423e-05	0.00275079
Contig119690	ref|XP_012532458.1| PREDICTED: uncharacterized protein LOC105834482 [Monomorium pharaonis]	1.32516	-12.1212	2.95417	-4.10309	4.07676e-05	0.00269427
Contig140114	ref|XP_011168109.1| PREDICTED: uncharacterized protein LOC105201688 isoform X2 [Solenopsis invicta]	0.700614	-12.1162	2.96167	-4.09101	4.29507e-05	0.0028306
Contig94496	ref|XP_012540752.1| PREDICTED: poly(ADP-ribose) glycohydrolase-like [Monomorium pharaonis]	0.573064	-12.1107	2.96161	-4.08923	4.32811e-05	0.00284972
Contig115550	ref|XP_012234439.1| PREDICTED: uncharacterized protein LOC105679152 [Linepithema humile]	0.980594	-12.1011	2.53964	-4.76488	1.88971e-06	0.000161628
Contig96447	#N/A	0.905333	-12.0954	2.9542	-4.09432	4.23405e-05	0.00279429
Contig129833	#N/A	0.494855	-12.09	2.95678	-4.0889	4.33419e-05	0.00285239
Contig31474	#N/A	0.426635	-12.0896	2.96264	-4.08068	4.49046e-05	0.00294699
Contig34118	#N/A	0.910448	-12.0859	2.95906	-4.08436	4.41976e-05	0.002906
Contig47670	#N/A	0.658969	-12.0802	2.96001	-4.08112	4.48193e-05	0.00294276
Contig70512	#N/A	0.50328	-12.0732	2.96266	-4.07513	4.5988e-05	0.0030139
Contig49468	ref|XP_011867631.1| PREDICTED: transmembrane 7 superfamily member 3-like [Vollenhovia emeryi]	1.12728	-12.0725	2.9559	-4.08421	4.42263e-05	0.00290653
Contig75323	ref|XP_011882740.1| PREDICTED: another transcription unit protein-like [Vollenhovia emeryi]	0.563336	-12.0553	2.96374	-4.0676	4.74994e-05	0.00310719
Contig99163	ref|XP_011867945.1| PREDICTED: uncharacterized protein LOC105562053 [Vollenhovia emeryi]	0.500686	-12.0512	2.95911	-4.07259	4.64934e-05	0.0030442
Contig690	#N/A	12.5937	-12.0445	2.93222	-4.10765	3.99709e-05	0.00265029
Contig101854	#N/A	0.561573	-12.0378	2.96163	-4.06459	4.81165e-05	0.00314174
Contig107616	ref|XP_011061435.1| PREDICTED: very low-density lipoprotein receptor-like isoform X4 [Acromyrmex echinatior]	0.60145	-12.0358	2.6814	-4.48865	7.16774e-06	0.000557085
Contig93079	#N/A	0.405664	-12.0287	2.9611	-4.06226	4.86009e-05	0.00316921
Contig95638	#N/A	0.335933	-12.0254	2.95891	-4.06412	4.82135e-05	0.00314662
Contig134934	ref|XP_011056905.1| PREDICTED: calcitonin gene-related peptide type 1 receptor-like isoform X3 [Acromyrmex echinatior]	3.47306	-12.0144	2.32458	-5.16841	2.36092e-07	2.17181e-05
Contig133921	ref|XP_011872126.1| PREDICTED: uncharacterized protein LOC105564406 isoform X1 [Vollenhovia emeryi]	0.798821	-12.0141	2.95217	-4.06959	4.70959e-05	0.00308222
Contig124243	ref|XP_011879210.1| PREDICTED: argininosuccinate lyase [Vollenhovia emeryi]	0.993161	-11.9993	2.95386	-4.06224	4.86046e-05	0.00316921
Contig39570	#N/A	0.421117	-11.9979	2.9612	-4.05171	5.08451e-05	0.00330159
Contig138354	ref|XP_011878101.1| PREDICTED: uncharacterized protein LOC105567657 [Vollenhovia emeryi]	0.286671	-11.997	2.96096	-4.05173	5.08399e-05	0.00330159
Contig97563	#N/A	0.531634	-11.989	2.95763	-4.0536	5.04362e-05	0.00328107
Contig30055	#N/A	0.570315	-11.9855	2.78104	-4.30974	1.63448e-05	0.00116699
Contig138928	ref|XP_011860695.1| PREDICTED: modifier of mdg4-like isoform X2 [Vollenhovia emeryi]	8.06639	-11.9828	2.95542	-4.0545	5.02408e-05	0.00326986
Contig66849	ref|XP_011876399.1| PREDICTED: ras-related protein Rab-32 isoform X2 [Vollenhovia emeryi]	0.737886	-11.9745	2.95737	-4.04905	5.14255e-05	0.0033301
Contig63714	#N/A	0.266409	-11.9702	2.9643	-4.03812	5.38803e-05	0.00346997
Contig93562	ref|XP_012536977.1| PREDICTED: BRCA1-A complex subunit BRE-like [Monomorium pharaonis]	6.66974	-11.9699	2.95495	-4.05078	5.10476e-05	0.00331169
Contig78378	ref|XP_011173920.1| PREDICTED: glycogen [starch] synthase [Solenopsis invicta]	0.404493	-11.9623	2.95587	-4.04696	5.18877e-05	0.00335541
Contig32561	#N/A	1.56339	-11.9561	2.95793	-4.04205	5.2985e-05	0.00342011
Contig144900	#N/A	0.485827	-11.9527	2.95863	-4.03996	5.34613e-05	0.00344771
Contig97816	#N/A	5.85551	-11.9518	2.95343	-4.04676	5.19324e-05	0.00335677
Contig138344	#N/A	0.315792	-11.9444	2.96123	-4.0336	5.49282e-05	0.00353424
Contig100087	ref|XP_014371867.1| PREDICTED: RNA-directed DNA polymerase from mobile element jockey-like [Papilio machaon]	0.432861	-11.9305	2.95812	-4.03314	5.50373e-05	0.00353965
Contig147953	ref|XP_012535774.1| PREDICTED: putative inorganic phosphate cotransporter [Monomorium pharaonis]	3.62147	-11.9267	1.98029	-6.02272	1.71511e-09	2.20309e-07
Contig29921	ref|XP_011875537.1| PREDICTED: U2 snRNP-associated SURP motif-containing protein isoform X1 [Vollenhovia emeryi]	1.24615	-11.9223	2.95418	-4.03576	5.44265e-05	0.00350355
Contig122448	#N/A	0.268765	-11.906	2.96314	-4.01805	5.86827e-05	0.0037485
Contig128515	ref|XP_011881415.1| PREDICTED: uncharacterized protein LOC105569512 [Vollenhovia emeryi]	0.420284	-11.9053	2.95724	-4.02581	5.67792e-05	0.00364008
Contig11834	ref|XP_012559998.1| PREDICTED: uncharacterized protein LOC105846126 [Hydra vulgaris]	1.4336	-11.9024	2.95342	-4.03004	5.57671e-05	0.00358006
Contig21522	#N/A	0.368725	-11.896	2.95959	-4.01948	5.83265e-05	0.00373081
Contig137319	#N/A	0.253472	-11.8953	2.9633	-4.01421	5.96454e-05	0.00379798
Contig87853	ref|XP_011861915.1| PREDICTED: serine/threonine-protein kinase fused [Vollenhovia emeryi]	1.89229	-11.8945	2.959	-4.01978	5.82529e-05	0.00372779
Contig62700	#N/A	0.344225	-11.8924	2.96092	-4.01645	5.90803e-05	0.00377049
Contig67754	#N/A	0.319932	-11.8923	2.96286	-4.01379	5.97509e-05	0.00380298
Contig132921	#N/A	0.480345	-11.888	2.96238	-4.01298	5.99579e-05	0.00381272
Contig116271	ref|XP_011638968.1| PREDICTED: palmitoyltransferase ZDHHC3 isoform X1 [Pogonomyrmex barbatus]	1.44182	-11.8801	2.95029	-4.02674	5.65559e-05	0.0036274
Contig104470	#N/A	0.41003	-11.8756	2.96307	-4.00787	6.12685e-05	0.00389081
Contig123015	#N/A	0.360328	-11.8563	2.96004	-4.00545	6.19001e-05	0.00392739
Contig106338	#N/A	0.32466	-11.8557	2.96131	-4.00354	6.24008e-05	0.00395738
Contig30756	ref|XP_011686459.1| PREDICTED: uncharacterized protein LOC105449160 isoform X1 [Wasmannia auropunctata]	0.353588	-11.8553	2.96278	-4.00142	6.29639e-05	0.0039913
Contig56881	ref|XP_011636222.1| PREDICTED: iduronate 2-sulfatase [Pogonomyrmex barbatus]	0.824227	-11.8408	2.95459	-4.00759	6.13427e-05	0.00389377
Contig112776	#N/A	0.352824	-11.8393	2.96528	-3.99262	6.53469e-05	0.00412755
Contig55199	ref|XP_011880381.1| PREDICTED: uncharacterized protein LOC105568915 [Vollenhovia emeryi]	0.591774	-11.8365	2.95956	-3.99941	6.35013e-05	0.00401996
Contig107811	ref|XP_012224292.1| PREDICTED: glutamate-gated chloride channel isoform X9 [Linepithema humile]	2.18144	-11.8363	2.94812	-4.01487	5.94795e-05	0.0037909
Contig51838	#N/A	0.315006	-11.8345	2.96124	-3.99647	6.4295e-05	0.00406656
Contig90270	#N/A	0.454151	-11.8123	2.95938	-3.99149	6.56597e-05	0.0041436
Contig44027	#N/A	0.495804	-11.807	2.95652	-3.99355	6.50912e-05	0.00411508
Contig85606	#N/A	0.359475	-11.7992	2.9609	-3.98502	6.74737e-05	0.00425048
Contig141629	ref|XP_011879293.1| PREDICTED: uncharacterized protein LOC105568321, partial [Vollenhovia emeryi]	0.435358	-11.7963	2.95705	-3.9892	6.6297e-05	0.00418008
Contig143796	ref|XP_011875586.1| PREDICTED: MRG/MORF4L-binding protein [Vollenhovia emeryi]	1.93067	-11.777	2.41185	-4.88297	1.04501e-06	9.11465e-05
Contig33773	ref|XP_012062013.1| PREDICTED: CXXC-type zinc finger protein 1-like [Atta cephalotes]	0.410636	-11.771	2.95923	-3.97773	6.95769e-05	0.00437128
Contig125398	ref|XP_011060171.1| PREDICTED: TGF-beta receptor type-1 isoform X4 [Acromyrmex echinatior]	0.429454	-11.7671	2.9573	-3.97899	6.92089e-05	0.00435009
Contig79923	#N/A	0.318631	-11.7666	2.95862	-3.97705	6.97755e-05	0.00438181
Contig79590	ref|XP_012230075.1| PREDICTED: cAMP-dependent protein kinase catalytic subunit PRKX [Linepithema humile]	0.510461	-11.7636	2.96038	-3.97366	7.07763e-05	0.00443677
Contig71131	ref|XP_011166543.1| PREDICTED: anoctamin-8 isoform X1 [Solenopsis invicta]	3.9141	-11.7543	2.95371	-3.97949	6.90632e-05	0.00434287
Contig119997	ref|XP_011172326.1| PREDICTED: protein big brother-like [Solenopsis invicta]	0.348202	-11.7509	2.96302	-3.96586	7.31314e-05	0.00456416
Contig104369	ref|XP_015119432.1| PREDICTED: zinc finger BED domain-containing protein RICESLEEPER 2-like [Diachasma alloeum]	0.310363	-11.747	2.96425	-3.96288	7.40499e-05	0.00461333
Contig31937	#N/A	0.527416	-11.7305	2.95958	-3.96355	7.38427e-05	0.00460245
Contig103792	ref|XP_011696374.1| PREDICTED: superoxide dismutase [Cu-Zn]-like [Wasmannia auropunctata]	0.413193	-11.7253	2.96127	-3.95954	7.50946e-05	0.00466402
Contig122314	ref|XP_012538962.1| PREDICTED: calcium-independent phospholipase A2-gamma-like isoform X3 [Monomorium pharaonis]	0.896556	-11.7235	2.96008	-3.96055	7.47787e-05	0.00464849
Contig23550	#N/A	0.363205	-11.7232	2.95734	-3.96411	7.3669e-05	0.00459365
Contig73261	ref|XP_011058726.1| PREDICTED: transmembrane protein 39A isoform X2 [Acromyrmex echinatior]	3.52442	-11.7227	2.94813	-3.97633	6.99871e-05	0.00439119
Contig149716	ref|XP_012220362.1| PREDICTED: atrial natriuretic peptide receptor 1 isoform X3 [Linepithema humile]	0.609307	-11.7175	2.95784	-3.9615	7.44792e-05	0.00463599
Contig1460	#N/A	0.424493	-11.7165	2.96154	-3.9562	7.61499e-05	0.00472398
Contig68135	ref|XP_011861649.1| PREDICTED: UDP-glucuronosyltransferase 2B1-like [Vollenhovia emeryi]	0.448552	-11.7164	2.95496	-3.96499	7.34005e-05	0.00457892
Contig36995	#N/A	0.376121	-11.7104	2.96004	-3.95617	7.61603e-05	0.00472398
Contig66514	ref|XP_012535774.1| PREDICTED: putative inorganic phosphate cotransporter [Monomorium pharaonis]	1.17618	-11.7062	2.95909	-3.95602	7.62081e-05	0.00472487
Contig50230	ref|XP_011881997.1| PREDICTED: thyrotropin-releasing hormone-degrading ectoenzyme-like [Vollenhovia emeryi]	3.55085	-11.7003	2.51927	-4.64433	3.41177e-06	0.000283405
Contig124572	ref|XP_012531829.1| PREDICTED: heterogeneous nuclear ribonucleoprotein A2 homolog 1-like [Monomorium pharaonis]	1.41549	-11.6984	2.95728	-3.95579	7.62835e-05	0.00472579
Contig47897	ref|XP_011874896.1| PREDICTED: uncharacterized protein LOC105565918 [Vollenhovia emeryi]	1.00856	-11.6899	2.95263	-3.95913	7.52224e-05	0.0046699
Contig68598	#N/A	0.404719	-11.6848	2.96212	-3.94474	7.98873e-05	0.00492274
Contig24034	#N/A	0.390098	-11.6815	2.95949	-3.94714	7.90895e-05	0.00487996
Contig83566	#N/A	0.386256	-11.6786	2.96099	-3.94416	8.00811e-05	0.00493253
Contig71842	#N/A	0.474649	-11.678	2.95779	-3.94822	7.87356e-05	0.00486025
Contig59800	#N/A	0.687016	-11.6761	2.95198	-3.95535	7.64215e-05	0.00473187
Contig114394	#N/A	0.421704	-11.6743	2.95847	-3.94607	7.9445e-05	0.00489907
Contig95032	ref|XP_011687058.1| PREDICTED: dual specificity protein phosphatase 3-like [Wasmannia auropunctata]	0.884763	-11.6723	2.95533	-3.94959	7.82862e-05	0.00483673
Contig59294	ref|XP_017047594.1| PREDICTED: zinc-type alcohol dehydrogenase-like protein MW2112, partial [Drosophila ficusphila]	0.694894	-11.6619	2.96049	-3.93918	8.17614e-05	0.00502726
Contig133325	ref|XP_012529462.1| PREDICTED: calcium/calmodulin-dependent 3',5'-cyclic nucleotide phosphodiesterase 1A-like isoform X6 [Monomorium pharaonis]	1.89609	-11.6546	2.96318	-3.93316	8.38381e-05	0.00514823
Contig24758	ref|XP_011879391.1| PREDICTED: uncharacterized protein LOC105568371 [Vollenhovia emeryi]	21.2034	-11.643	2.9634	-3.92894	8.53208e-05	0.005237
Contig143193	#N/A	0.28585	-11.637	2.9625	-3.92809	8.5624e-05	0.00525333
Contig106503	ref|XP_011069309.1| PREDICTED: F-box/WD repeat-containing protein 9-like [Acromyrmex echinatior]	0.324079	-11.6244	2.96406	-3.92179	8.78942e-05	0.0053786
Contig134554	#N/A	0.465523	-11.6211	2.96036	-3.92558	8.65199e-05	0.00530599
Contig73516	#N/A	0.458628	-11.616	2.95923	-3.92535	8.66055e-05	0.00530894
Contig116865	ref|XP_002169704.3| PREDICTED: uncharacterized protein LOC100209634 [Hydra vulgaris]	0.276276	-11.6094	2.96311	-3.91797	8.92978e-05	0.0054574
Contig137771	#N/A	0.320235	-11.6053	2.9616	-3.9186	8.90643e-05	0.00544549
Contig28050	ref|XP_011883867.1| PREDICTED: uncharacterized protein LOC105571009 isoform X2 [Vollenhovia emeryi]	0.516106	-11.6008	2.95718	-3.92294	8.74751e-05	0.00535542
Contig104131	#N/A	0.485948	-11.5984	2.96395	-3.91316	9.10978e-05	0.0055506
Contig133529	ref|XP_011878775.1| PREDICTED: trace amine-associated receptor 9 [Vollenhovia emeryi]	1.37332	-11.5938	2.95451	-3.9241	8.70545e-05	0.00533415
Contig37919	#N/A	0.343237	-11.5922	2.96338	-3.91181	9.16079e-05	0.00557687
Contig135178	ref|XP_011063755.1| PREDICTED: dihydroxyacetone phosphate acyltransferase [Acromyrmex echinatior]	0.595513	-11.5891	2.95803	-3.91785	8.93416e-05	0.00545772
Contig95695	#N/A	0.634802	-11.5846	2.95735	-3.91723	8.95709e-05	0.00546936
Contig33624	ref|XP_011883286.1| PREDICTED: uncharacterized protein LOC105570580 [Vollenhovia emeryi]	0.925203	-11.5841	2.57599	-4.49695	6.89344e-06	0.000538634
Contig104104	#N/A	0.399964	-11.5831	2.961	-3.91188	9.15802e-05	0.00557687
Contig43971	#N/A	0.374405	-11.5784	2.96018	-3.91139	9.17664e-05	0.00558412
Contig28675	#N/A	0.28267	-11.5688	2.96436	-3.90261	9.51595e-05	0.00576624
Contig132244	ref|XP_014759086.1| uncharacterized protein Dana_GF27150 [Drosophila ananassae]	0.555798	-11.5556	2.9562	-3.90893	9.27064e-05	0.00563404
Contig82673	ref|XP_011706442.1| PREDICTED: small integral membrane protein 8-like, partial [Wasmannia auropunctata]	0.384796	-11.5539	2.96109	-3.90191	9.54374e-05	0.00578012
Contig110107	ref|XP_012276755.1| PREDICTED: AP-1 complex subunit sigma-2 isoform X3 [Orussus abietinus]	0.476179	-11.5437	2.9579	-3.90268	9.5133e-05	0.00576624
Contig59695	ref|XP_015127114.1| PREDICTED: uncharacterized protein LOC107048461 [Diachasma alloeum]	0.697931	-11.543	2.95972	-3.90002	9.61833e-05	0.0058228
Contig84588	ref|XP_011864763.1| PREDICTED: telomerase reverse transcriptase-like [Vollenhovia emeryi]	2.89344	-11.5353	2.79948	-4.12051	3.78038e-05	0.0025208
Contig62534	#N/A	0.284406	-11.5245	2.96342	-3.88892	0.000100692	0.00607495
Contig119688	ref|XP_012532458.1| PREDICTED: uncharacterized protein LOC105834482 [Monomorium pharaonis]	2.14937	-11.524	2.96086	-3.89213	9.93699e-05	0.0060054
Contig17117	ref|XP_012521425.1| PREDICTED: major facilitator superfamily domain-containing protein 6-like [Monomorium pharaonis]	0.867413	-11.5199	2.95546	-3.89782	9.70622e-05	0.00587349
Contig48251	#N/A	0.385358	-11.507	2.96418	-3.88201	0.000103598	0.00623957
Contig35114	ref|XP_011870342.1| PREDICTED: latrophilin Cirl-like isoform X2 [Vollenhovia emeryi]	1.59253	-11.4944	2.51264	-4.57463	4.77056e-06	0.000386949
Contig89657	ref|XP_011163078.1| PREDICTED: putative nuclease HARBI1 [Solenopsis invicta]	0.912955	-11.4906	2.95332	-3.89074	9.99375e-05	0.00603456
Contig89848	#N/A	1.8077	-11.4878	2.95837	-3.88316	0.000103109	0.00621281
Contig124041	#N/A	0.359437	-11.4832	2.96028	-3.87909	0.000104849	0.00630687
Contig45122	ref|XP_011708199.1| PREDICTED: WD repeat-containing protein 66-like [Wasmannia auropunctata]	0.290265	-11.4765	2.9636	-3.87249	0.00010773	0.00645547
Contig53683	#N/A	0.349085	-11.4747	2.96251	-3.87331	0.000107369	0.00643928
Contig130457	#N/A	0.322605	-11.4742	2.95932	-3.87732	0.000105614	0.00635019
Contig108581	ref|XP_012532591.1| PREDICTED: diacylglycerol kinase 1 [Monomorium pharaonis]	1.11449	-11.4665	2.95427	-3.88132	0.000103891	0.00625455
Contig126290	#N/A	0.446006	-11.462	2.95745	-3.87564	0.000106345	0.00638246
Contig66248	ref|XP_011689025.1| PREDICTED: luciferin 4-monooxygenase-like [Wasmannia auropunctata]	0.596634	-11.4537	2.96073	-3.86854	0.000109491	0.00655262
Contig54379	#N/A	0.470522	-11.453	2.95854	-3.87117	0.000108312	0.00648759
Contig37534	#N/A	0.388857	-11.4511	2.95956	-3.86918	0.000109202	0.00653811
Contig70208	ref|XP_012533218.1| PREDICTED: acidic fibroblast growth factor intracellular-binding protein [Monomorium pharaonis]	3.42352	-11.4427	2.04539	-5.5944	2.21384e-08	2.42864e-06
Contig103655	#N/A	0.293265	-11.4414	2.96202	-3.8627	0.000112141	0.00668854
Contig18690	ref|XP_011685485.1| PREDICTED: uncharacterized protein LOC105448537 [Wasmannia auropunctata]	1.41846	-11.433	2.84978	-4.01189	6.02344e-05	0.00382858
Contig65666	#N/A	0.344336	-11.4225	2.96005	-3.85888	0.00011391	0.00677976
Contig123834	ref|XP_011176126.1| PREDICTED: high affinity nerve growth factor receptor-like [Solenopsis invicta]	1.76331	-11.4125	2.9541	-3.86327	0.000111879	0.00667859
Contig89927	ref|XP_011696005.1| PREDICTED: peptide-N(4)-(N-acetyl-beta-glucosaminyl)asparagine amidase [Wasmannia auropunctata]	1.17425	-11.4106	2.12343	-5.37365	7.71601e-08	7.56068e-06
Contig10254	ref|XP_011860090.1| PREDICTED: DNA endonuclease RBBP8-like [Vollenhovia emeryi]	0.590156	-11.409	2.95694	-3.85837	0.000114147	0.00679098
Contig37602	#N/A	0.467164	-11.4087	2.96061	-3.85351	0.000116436	0.00691205
Contig144526	ref|XP_011688242.1| PREDICTED: CDK5RAP1-like protein [Wasmannia auropunctata]	3.1644	-11.4061	2.32001	-4.91642	8.81416e-07	7.73549e-05
Contig40110	ref|XP_011639712.1| PREDICTED: F-box/WD repeat-containing protein 9-like isoform X2 [Pogonomyrmex barbatus]	0.744681	-11.4008	2.95637	-3.85636	0.000115088	0.00684119
Contig52030	ref|XP_011053020.1| PREDICTED: trithorax group protein osa-like [Acromyrmex echinatior]	2.53166	-11.3902	2.9457	-3.86674	0.000110299	0.00659816
Contig110036	ref|XP_011875147.1| PREDICTED: recQ-mediated genome instability protein 1-like isoform X2 [Vollenhovia emeryi]	2.11641	-11.3899	2.16027	-5.27242	1.34633e-07	1.27331e-05
Contig125929	ref|XP_011313392.1| PREDICTED: uncharacterized protein LOC105272858 [Fopius arisanus]	0.657224	-11.386	2.96385	-3.84163	0.000122217	0.00720741
Contig72873	#N/A	0.327655	-11.3839	2.96182	-3.84354	0.000121272	0.0071579
Contig134065	ref|XP_011686973.1| PREDICTED: guanylate cyclase 32E isoform X1 [Wasmannia auropunctata]	1.15427	-11.3787	2.95287	-3.85343	0.000116475	0.00691205
Contig73042	ref|XP_011865553.1| PREDICTED: uncharacterized protein LOC105560767, partial [Vollenhovia emeryi]	0.428551	-11.3717	2.96237	-3.83874	0.000123668	0.00728385
Contig103522	#N/A	0.684417	-11.3705	2.95017	-3.85419	0.000116115	0.00689648
Contig106295	#N/A	0.363858	-11.3677	2.96027	-3.84007	0.000122999	0.00725048
Contig56580	ref|XP_011873188.1| PREDICTED: LOW QUALITY PROTEIN: uncharacterized protein LOC105564994 [Vollenhovia emeryi]	0.949943	-11.3638	2.95759	-3.84225	0.000121914	0.00719252
Contig109093	#N/A	0.478186	-11.3625	2.95559	-3.84442	0.00012084	0.00714707
Contig7508	ref|XP_011870716.1| PREDICTED: uncharacterized protein LOC105563606 [Vollenhovia emeryi]	0.901451	-11.3596	2.955	-3.8442	0.000120945	0.00715029
Contig43062	#N/A	0.374929	-11.3502	2.96221	-3.83166	0.00012728	0.00746546
Contig11468	ref|XP_011875542.1| PREDICTED: uncharacterized protein LOC105566272 [Vollenhovia emeryi]	17.2127	-11.3405	2.95038	-3.84374	0.000121174	0.0071579
Contig37384	ref|XP_012063448.1| PREDICTED: A-kinase anchor protein 9-like [Atta cephalotes]	0.938473	-11.3362	2.95708	-3.83356	0.000126301	0.00741418
Contig73670	ref|XP_011882902.1| PREDICTED: rho GTPase-activating protein 26 isoform X1 [Vollenhovia emeryi]	0.808159	-11.3317	2.96111	-3.82684	0.000129798	0.00760682
Contig2184	ref|XP_011642139.1| PREDICTED: calcium-binding mitochondrial carrier protein Aralar1 isoform X7 [Pogonomyrmex barbatus]	0.4467	-11.3259	2.96057	-3.82559	0.00013046	0.00763613
Contig58131	#N/A	0.429692	-11.313	2.96098	-3.8207	0.000133072	0.00777611
Contig109736	#N/A	0.412427	-11.3019	2.95992	-3.81831	0.00013437	0.00784547
Contig89875	#N/A	0.347248	-11.2966	2.96383	-3.81148	0.000138136	0.00804874
Contig13582	ref|XP_011173491.1| PREDICTED: transient receptor potential cation channel protein painless-like [Solenopsis invicta]	7.92982	-11.2956	2.95746	-3.81936	0.000133796	0.00781521
Contig52155	ref|XP_008178499.1| PREDICTED: uncharacterized protein K02A2.6-like [Acyrthosiphon pisum]	0.704038	-11.2823	2.95938	-3.8124	0.000137623	0.00802216
Contig73968	#N/A	0.344533	-11.2746	2.96098	-3.80771	0.000140258	0.00816228
Contig41584	ref|XP_011171771.1| PREDICTED: gamma-tubulin complex component 2 homolog [Solenopsis invicta]	0.253406	-11.2734	2.96354	-3.80402	0.000142365	0.00826284
Contig40676	#N/A	0.413342	-11.2692	2.96444	-3.80146	0.000143845	0.00834014
Contig13638	#N/A	0.386033	-11.2652	2.95643	-3.81041	0.000138738	0.00808047
Contig133952	ref|XP_011631189.1| PREDICTED: circadian clock-controlled protein [Pogonomyrmex barbatus]	10.9813	-11.2634	2.96335	-3.80091	0.000144168	0.00835201
Contig142357	ref|XP_011873621.1| PREDICTED: uncharacterized protein LOC105565222 isoform X1 [Vollenhovia emeryi]	0.678656	-11.2623	2.95989	-3.80498	0.000141814	0.00824339
Contig32674	#N/A	0.482422	-11.2621	2.9601	-3.80464	0.00014201	0.00825064
Contig33293	ref|XP_011867784.1| PREDICTED: putative methyltransferase NSUN6 isoform X1 [Vollenhovia emeryi]	0.517866	-11.2606	2.95858	-3.80607	0.000141191	0.00821317
Contig84389	#N/A	0.310257	-11.2604	2.96312	-3.8002	0.000144582	0.00836913
Contig77670	#N/A	0.364617	-11.2548	2.96291	-3.79857	0.000145531	0.00841712
Contig56277	#N/A	0.346987	-11.2545	2.96246	-3.79903	0.000145262	0.00840506
Contig76776	ref|XP_011862944.1| PREDICTED: uncharacterized protein LOC105559342 [Vollenhovia emeryi]	4.43699	-11.247	2.96374	-3.79485	0.000147733	0.00852767
Contig62536	#N/A	0.327012	-11.2459	2.95851	-3.80119	0.000144001	0.00834572
Contig63892	#N/A	1.16584	-11.2434	2.15373	-5.22044	1.78496e-07	1.67359e-05
Contig82549	ref|XP_011687433.1| PREDICTED: ectopic P granules protein 5 homolog, partial [Wasmannia auropunctata]	0.376374	-11.2433	2.96224	-3.79554	0.000147324	0.0085139
Contig122268	ref|XP_012060634.1| PREDICTED: uncharacterized protein LOC105623871 [Atta cephalotes]	0.919418	-11.2419	2.95531	-3.80397	0.000142395	0.00826284
Contig45553	#N/A	0.566484	-11.2378	2.95861	-3.79834	0.000145669	0.00842168
Contig95054	#N/A	0.358271	-11.2362	2.96074	-3.79507	0.000147603	0.0085265
Contig116475	ref|XP_011867736.1| PREDICTED: PCTP-like protein isoform X5 [Vollenhovia emeryi]	1.06905	-11.2154	2.95874	-3.79062	0.000150274	0.00865249
Contig95293	ref|XP_012063773.1| PREDICTED: TNF receptor-associated factor 4 [Atta cephalotes]	2.44613	-11.212	2.34496	-4.78132	1.74147e-06	0.000149311
Contig97645	#N/A	0.583068	-11.2102	2.96248	-3.78407	0.000154283	0.00886891
Contig54289	ref|XP_011646024.1| PREDICTED: LOW QUALITY PROTEIN: trafficking protein particle complex subunit 11 [Pogonomyrmex barbatus]	1.04216	-11.2096	2.955	-3.79342	0.000148585	0.00856574
Contig76788	ref|XP_015114275.1| PREDICTED: 60S ribosomal protein L30 [Diachasma alloeum]	0.895276	-11.1954	2.20806	-5.07025	3.973e-07	3.58705e-05
Contig49659	ref|XP_011690639.1| PREDICTED: uncharacterized protein LOC105451717 isoform X2 [Wasmannia auropunctata]	1.8517	-11.1911	2.96328	-3.77658	0.000158994	0.00911742
Contig76159	#N/A	2.17008	-11.184	2.96336	-3.77411	0.000160582	0.00920106
Contig101461	ref|XP_012538239.1| PREDICTED: UPF0160 protein MYG1, mitochondrial isoform X3 [Monomorium pharaonis]	29.8398	-11.1821	2.96442	-3.7721	0.000161882	0.00926798
Contig5632	#N/A	0.357319	-11.173	2.96333	-3.77043	0.000162967	0.00932635
Contig31045	#N/A	0.339992	-11.1685	2.96284	-3.76952	0.000163563	0.00935285
Contig42347	#N/A	3.02645	-11.164	2.9524	-3.78133	0.000155994	0.00895629
Contig79361	#N/A	0.352512	-11.1541	2.96516	-3.76171	0.000168754	0.00962636
Contig112716	ref|XP_012342793.1| PREDICTED: fructose-2,6-bisphosphatase TIGAR-like, partial [Apis florea]	0.291604	-11.1531	2.96398	-3.76287	0.000167975	0.00958966
Contig98887	#N/A	0.420696	-11.149	2.96018	-3.76634	0.000165659	0.0094651
Contig44563	ref|XP_012058062.1| PREDICTED: uncharacterized protein LOC105621200 [Atta cephalotes]	7.27253	-11.1485	2.94662	-3.78347	0.000154655	0.00888305
Contig3398	#N/A	0.235077	-11.1459	2.96437	-3.75995	0.000169946	0.00967478
Contig36314	#N/A	0.474167	-11.135	2.96211	-3.75913	0.000170505	0.0096988
Contig109500	#N/A	0.269201	-11.1336	2.96253	-3.75814	0.000171184	0.00972961
Contig20172	ref|XP_011695131.1| PREDICTED: bipolar kinesin KRP-130-like [Wasmannia auropunctata]	1.79759	-11.1322	2.95346	-3.76919	0.000163778	0.00936138
Contig136330	#N/A	0.361898	-11.1273	2.96051	-3.75857	0.000170884	0.00971647
Contig27965	#N/A	0.363935	-11.1193	2.95704	-3.76027	0.000169732	0.0096665
Contig107460	ref|XP_011696904.1| PREDICTED: leupaxin isoform X4 [Wasmannia auropunctata]	0.674706	-11.1155	2.95601	-3.7603	0.000169707	0.0096665
Contig123973	ref|XP_011862944.1| PREDICTED: uncharacterized protein LOC105559342 [Vollenhovia emeryi]	5.99958	-11.1107	2.96581	-3.74625	0.000179496	0.0101408
Contig36661	#N/A	0.459113	-11.1094	2.96073	-3.75225	0.000175255	0.00993303
Contig107370	#N/A	0.854363	-11.1003	2.95553	-3.75578	0.000172806	0.00980964
Contig95037	#N/A	2.60676	-11.0958	2.6734	-4.15045	3.31817e-05	0.00223687
Contig65589	ref|XP_011635144.1| PREDICTED: nephrin [Pogonomyrmex barbatus]	0.496319	-11.0888	2.9613	-3.74457	0.000180706	0.0102047
Contig129008	#N/A	0.303584	-11.0888	2.9598	-3.74646	0.000179347	0.0101365
Contig74795	ref|XP_011159417.1| PREDICTED: nuclear pore complex protein Nup85 [Solenopsis invicta]	1.03499	-11.072	2.95781	-3.74332	0.000181604	0.0102436
Contig142754	ref|XP_011859349.1| PREDICTED: uncharacterized protein LOC105556847 [Vollenhovia emeryi]	0.749071	-11.072	2.95769	-3.74347	0.000181496	0.0102416
Contig24364	ref|XP_011866808.1| PREDICTED: collagen alpha-2(IV) chain-like isoform X2 [Vollenhovia emeryi]	0.529202	-11.0663	2.96028	-3.73826	0.0001853	0.0104312
Contig72260	#N/A	0.317902	-11.0559	2.9626	-3.73183	0.000190096	0.0106714
Contig114897	ref|XP_011701089.1| PREDICTED: sodium/potassium/calcium exchanger 3-like [Wasmannia auropunctata]	1.3979	-11.053	2.96346	-3.72975	0.000191671	0.0107428
Contig134482	#N/A	0.28699	-11.0469	2.9622	-3.72929	0.000192017	0.0107579
Contig64505	ref|XP_011869290.1| PREDICTED: tyrosine-protein phosphatase 10D isoform X1 [Vollenhovia emeryi]	0.381127	-11.0457	2.96055	-3.73094	0.000190766	0.0106963
Contig21142	ref|XP_011862951.1| PREDICTED: integumentary mucin C.1-like [Vollenhovia emeryi]	9.82676	-11.0352	2.96366	-3.7235	0.000196478	0.0109817
Contig16363	ref|XP_012349429.1| PREDICTED: uncharacterized protein LOC100865248 [Apis florea]	0.764795	-11.0343	2.9516	-3.7384	0.000185196	0.0104295
Contig123025	ref|XP_011169209.1| PREDICTED: kinesin-like protein Klp10A isoform X3 [Solenopsis invicta]	1.75604	-11.0334	2.95469	-3.7342	0.000188312	0.0105755
Contig93665	ref|XP_009167041.1| hypothetical protein T265_04119 [Opisthorchis viverrini]	0.444797	-11.02	2.96352	-3.71854	0.00020038	0.0111821
Contig101188	#N/A	0.729863	-11.0163	2.96107	-3.7204	0.00019891	0.0111089
Contig122816	ref|XP_011860556.1| PREDICTED: 2-amino-3-ketobutyrate coenzyme A ligase, mitochondrial [Vollenhovia emeryi]	2.17711	-11.0154	2.95524	-3.72741	0.000193456	0.0108299
Contig69581	ref|XP_011858733.1| PREDICTED: uncharacterized protein LOC105556257, partial [Vollenhovia emeryi]	1.69332	-11.0137	2.95643	-3.72532	0.000195064	0.0109156
Contig110922	ref|XP_011880242.1| PREDICTED: jmjC domain-containing histone demethylation protein 1-like [Vollenhovia emeryi]	1.97118	-11.0122	2.47353	-4.45204	8.50573e-06	0.0006514
Contig88355	#N/A	0.284402	-10.9943	2.9612	-3.71277	0.000205005	0.0114176
Contig66465	ref|XP_011879931.1| PREDICTED: glutamate receptor ionotropic, kainate 2-like [Vollenhovia emeryi]	1.02347	-10.988	2.95438	-3.71922	0.000199836	0.0111562
Contig146999	ref|XP_011881636.1| PREDICTED: uncharacterized protein LOC105569629 [Vollenhovia emeryi]	0.948638	-10.9826	2.95566	-3.71577	0.000202587	0.0112963
Contig114432	#N/A	0.334368	-10.9807	2.95926	-3.71061	0.000206761	0.0115064
Contig85048	ref|XP_011878519.1| PREDICTED: organic cation transporter protein-like [Vollenhovia emeryi]	5.48813	-10.9644	2.96307	-3.70037	0.000215283	0.0119336
Contig138607	ref|XP_011176102.1| PREDICTED: E3 ubiquitin-protein ligase MYCBP2-like [Solenopsis invicta]	1.07559	-10.9628	1.67751	-6.53515	6.35457e-11	1.03443e-08
Contig78556	#N/A	0.417457	-10.9613	2.95967	-3.70357	0.000212591	0.0117936
Contig76771	ref|XP_011870164.1| PREDICTED: microtubule-associated proteins 1A/1B light chain 3A-like isoform X2 [Vollenhovia emeryi]	4.54352	-10.9601	1.84526	-5.93962	2.8568e-09	3.56903e-07
Contig70993	ref|XP_011693644.1| PREDICTED: dual serine/threonine and tyrosine protein kinase-like isoform X4 [Wasmannia auropunctata]	0.269232	-10.9534	2.964	-3.69547	0.000219483	0.0121521
Contig86329	ref|XP_011882453.1| PREDICTED: uncharacterized protein LOC105570099 [Vollenhovia emeryi]	1.58232	-10.9468	1.7639	-6.20598	5.43559e-10	7.515e-08
Contig124585	ref|XP_011872665.1| PREDICTED: probable Ras GTPase-activating protein isoform X5 [Vollenhovia emeryi]	1.11186	-10.945	2.51201	-4.35707	1.31813e-05	0.00096352
Contig57847	ref|XP_015588059.1| PREDICTED: knirps-related protein-like isoform X1 [Cephus cinctus]	4.48939	-10.9444	2.6177	-4.18094	2.90306e-05	0.0019797
Contig51748	#N/A	0.365018	-10.9362	2.96037	-3.69419	0.00022059	0.0122039
Contig98351	ref|XP_011689243.1| PREDICTED: aarF domain-containing protein kinase 4 isoform X2 [Wasmannia auropunctata]	1.26168	-10.9304	2.96359	-3.68823	0.00022582	0.0124445
Contig107375	#N/A	0.575213	-10.9272	2.95889	-3.69301	0.000221615	0.0122558
Contig22191	ref|XP_011701882.1| PREDICTED: origin recognition complex subunit 4 isoform X1 [Wasmannia auropunctata]	0.494762	-10.9249	2.9599	-3.69096	0.000223406	0.0123355
Contig119710	ref|XP_011700874.1| PREDICTED: receptor-type tyrosine-protein phosphatase S-like [Wasmannia auropunctata]	0.919603	-10.9218	2.96025	-3.68947	0.00022472	0.0123887
Contig72218	#N/A	0.361679	-10.9142	2.96228	-3.68439	0.000229247	0.0126235
Contig104509	#N/A	0.437053	-10.9134	2.95721	-3.69044	0.000223868	0.0123514
Contig116757	ref|XP_011858874.1| PREDICTED: cytochrome P450 4c3-like, partial [Vollenhovia emeryi]	0.439001	-10.9071	2.95533	-3.69065	0.000223681	0.0123459
Contig31908	ref|XP_011704423.1| PREDICTED: probable cytochrome P450 6a14 [Wasmannia auropunctata]	1.76415	-10.9059	2.95409	-3.69181	0.000222668	0.0123044
Contig2921	ref|XP_017118186.1| PREDICTED: scyllo-inositol 2-dehydrogenase (NAD(+))-like [Drosophila elegans]	1.24968	-10.9052	2.9059	-3.75279	0.000174878	0.00991962
Contig47466	#N/A	0.927965	-10.9034	2.95943	-3.68429	0.000229342	0.0126238
Contig103511	ref|XP_012217790.1| PREDICTED: uncharacterized protein LOC105669412 isoform X3 [Linepithema humile]	0.310509	-10.9027	2.96427	-3.67804	0.00023503	0.0129168
Contig41548	#N/A	0.526145	-10.9024	2.96405	-3.67821	0.000234878	0.0129134
Contig60667	#N/A	0.301663	-10.8904	2.96345	-3.67491	0.000237937	0.0130613
Contig58412	ref|XP_011063608.1| PREDICTED: uncharacterized protein LOC105151536 [Acromyrmex echinatior]	0.219671	-10.8889	2.96348	-3.67435	0.000238456	0.0130847
Contig42140	#N/A	0.688651	-10.8839	2.95994	-3.67707	0.000235932	0.0129613
Contig94070	#N/A	0.372192	-10.8699	2.96198	-3.66982	0.000242721	0.0133084
Contig143968	#N/A	0.25227	-10.8638	2.963	-3.6665	0.000245896	0.0134564
Contig70132	ref|XP_011861021.1| PREDICTED: uncharacterized protein LOC105558111 [Vollenhovia emeryi]	1.78814	-10.861	2.46058	-4.414	1.01476e-05	0.000763895
Contig112923	#N/A	0.33295	-10.8551	2.96208	-3.66467	0.000247657	0.0135318
Contig87621	ref|XP_011633763.1| PREDICTED: uncharacterized protein LOC105424951 [Pogonomyrmex barbatus]	0.593164	-10.8503	2.9593	-3.6665	0.000245896	0.0134564
Contig106995	#N/A	0.29082	-10.8477	2.96479	-3.65886	0.000253342	0.0137997
Contig137209	ref|XP_011870010.1| PREDICTED: uncharacterized protein LOC105563220, partial [Vollenhovia emeryi]	0.686812	-10.8472	2.95816	-3.66686	0.000245547	0.0134477
Contig37723	ref|XP_011685440.1| PREDICTED: ecdysone 20-monooxygenase isoform X1 [Wasmannia auropunctata]	0.869844	-10.838	2.96398	-3.65658	0.000255602	0.0139121
Contig38265	ref|XP_011065127.1| PREDICTED: LOW QUALITY PROTEIN: uncharacterized protein LOC105152490 [Acromyrmex echinatior]	0.636549	-10.8363	2.95635	-3.66543	0.000246927	0.0135023
Contig79411	ref|XP_013190478.1| PREDICTED: retrovirus-related Pol polyprotein from transposon TNT 1-94 [Amyelois transitella]	28.5071	-10.8264	2.95739	-3.6608	0.000251431	0.0137044
Contig138612	#N/A	0.310902	-10.8247	2.96437	-3.65161	0.000260601	0.0141515
Contig119169	#N/A	0.494065	-10.8244	2.96376	-3.65224	0.00025996	0.0141221
Contig127501	ref|XP_011157749.1| PREDICTED: 26S proteasome non-ATPase regulatory subunit 12 [Solenopsis invicta]	0.29662	-10.8222	2.96232	-3.65328	0.000258907	0.0140811
Contig51415	#N/A	0.365981	-10.8183	2.96202	-3.65233	0.000259868	0.0141221
Contig85883	ref|XP_012059196.1| PREDICTED: translocating chain-associated membrane protein 1 [Atta cephalotes]	0.306724	-10.8175	2.96173	-3.65242	0.000259782	0.0141221
Contig3411	#N/A	0.653037	-10.8134	2.72588	-3.96694	7.28025e-05	0.00454764
Contig120706	#N/A	0.36963	-10.7995	2.96312	-3.64462	0.000267783	0.014508
Contig103953	ref|XP_012058253.1| PREDICTED: probable maleylacetoacetate isomerase 2 [Atta cephalotes]	5.03591	-10.7949	2.9444	-3.66624	0.000246141	0.0134646
Contig15839	ref|XP_011872815.1| PREDICTED: uncharacterized protein LOC105564777 [Vollenhovia emeryi]	0.363558	-10.7942	2.96411	-3.64164	0.000270903	0.0146658
Contig82190	#N/A	1.1193	-10.7937	2.95348	-3.65457	0.000257616	0.0140163
Contig130930	#N/A	0.28636	-10.7885	2.95982	-3.64499	0.000267403	0.014493
Contig54574	ref|XP_011877461.1| PREDICTED: chromosome transmission fidelity protein 18 homolog [Vollenhovia emeryi]	4.07055	-10.7709	2.96039	-3.63836	0.000274382	0.0148371
Contig52700	#N/A	0.487982	-10.7643	2.962	-3.63413	0.000278923	0.0150596
Contig104783	ref|XP_012542772.1| PREDICTED: uncharacterized protein LOC105840401 [Monomorium pharaonis]	0.700789	-10.7598	2.63795	-4.07885	4.52594e-05	0.00296752
Contig65463	#N/A	0.346949	-10.7568	2.96249	-3.63099	0.000282341	0.0152267
Contig106096	#N/A	0.448786	-10.7558	2.95891	-3.63505	0.000277926	0.0150115
Contig108517	ref|XP_012231231.1| PREDICTED: alpha-aminoadipic semialdehyde synthase, mitochondrial isoform X2 [Linepithema humile]	0.843	-10.7511	2.95854	-3.63392	0.000279147	0.0150659
Contig105089	ref|XP_011860219.1| PREDICTED: myotubularin-related protein 10-B isoform X2 [Vollenhovia emeryi]	3.22096	-10.7446	2.35376	-4.56488	4.99771e-06	0.000403983
Contig80400	ref|XP_011687748.1| PREDICTED: O-glucosyltransferase rumi homolog isoform X1 [Wasmannia auropunctata]	3.02355	-10.744	2.94686	-3.64591	0.000266442	0.014449
Contig72883	#N/A	0.521863	-10.7385	2.96382	-3.62319	0.000290996	0.0156457
Contig94067	#N/A	0.371605	-10.7307	2.96403	-3.62032	0.000294243	0.0158022
Contig145870	#N/A	0.478574	-10.728	2.95934	-3.62513	0.000288814	0.0155402
Contig98394	ref|XP_011705187.1| PREDICTED: uncharacterized protein LOC105460437 isoform X3 [Wasmannia auropunctata]	0.642573	-10.7269	2.95359	-3.63181	0.000281443	0.0151841
Contig52634	#N/A	0.410651	-10.72	2.96088	-3.62053	0.000293997	0.0157986
Contig114294	#N/A	0.242239	-10.7142	2.964	-3.61479	0.000300597	0.0160884
Contig73254	#N/A	0.378227	-10.7126	2.96197	-3.6167	0.000298385	0.0159841
Contig74762	ref|XP_012528669.1| PREDICTED: uncharacterized protein LOC105832356 [Monomorium pharaonis]	0.525235	-10.7088	2.96259	-3.61469	0.000300711	0.0160884
Contig93400	ref|XP_012147785.1| PREDICTED: uncharacterized protein LOC105663456 [Megachile rotundata]	0.305467	-10.7088	2.96415	-3.61277	0.000302945	0.0161955
Contig75254	ref|XP_011051558.1| PREDICTED: transcription factor Dp-1 [Acromyrmex echinatior]	0.39573	-10.6997	2.95894	-3.61606	0.000299118	0.0160153
Contig123838	ref|XP_011860090.1| PREDICTED: DNA endonuclease RBBP8-like [Vollenhovia emeryi]	0.278483	-10.6921	2.96405	-3.60726	0.000309444	0.016487
Contig64048	ref|XP_003695175.1| PREDICTED: formin-like protein CG32138, partial [Apis florea]	1.22792	-10.6886	2.947	-3.62693	0.000286809	0.0154441
Contig8893	#N/A	0.866883	-10.6843	2.95746	-3.61267	0.000303055	0.0161955
Contig87746	ref|XP_011876679.1| PREDICTED: apyrase-like [Vollenhovia emeryi]	1.32383	-10.676	2.95922	-3.6077	0.00030892	0.0164653
Contig51849	#N/A	0.31927	-10.6749	2.96152	-3.60452	0.000312733	0.0166559
Contig76435	#N/A	0.316595	-10.6744	2.96397	-3.60139	0.000316522	0.0168387
Contig35243	#N/A	0.496775	-10.6632	2.95919	-3.60343	0.000314044	0.0167195
Contig114722	ref|XP_011866087.1| PREDICTED: uncharacterized protein LOC105561048 [Vollenhovia emeryi]	0.319081	-10.6606	2.96228	-3.59877	0.000319725	0.0169835
Contig30829	#N/A	0.305548	-10.659	2.96384	-3.59634	0.000322721	0.0171169
Contig104142	#N/A	0.288697	-10.6586	2.9641	-3.59591	0.00032326	0.0171391
Contig78984	ref|XP_011707083.1| PREDICTED: dynein heavy chain 1, axonemal-like, partial [Wasmannia auropunctata]	0.45212	-10.6579	2.95902	-3.60184	0.000315972	0.0168158
Contig44887	#N/A	0.272059	-10.6522	2.96526	-3.59234	0.000327727	0.0173499
Contig52146	#N/A	1.37419	-10.6414	2.94837	-3.60924	0.000307099	0.0163744
Contig108003	#N/A	0.376857	-10.641	2.95865	-3.59658	0.000322428	0.0171078
Contig29970	#N/A	0.415227	-10.617	2.96128	-3.58526	0.000336741	0.0177804
Contig93839	#N/A	0.370103	-10.61	2.96016	-3.58426	0.00033804	0.0178357
Contig33672	ref|XP_012541827.1| PREDICTED: insulin-degrading enzyme isoform X1 [Monomorium pharaonis]	0.411397	-10.5924	2.96094	-3.57738	0.000347056	0.0182841
Contig130448	ref|XP_011063359.1| PREDICTED: uncharacterized protein LOC105151380 [Acromyrmex echinatior]	0.242876	-10.5839	2.96371	-3.57117	0.000355396	0.0187026
Contig89224	ref|XP_011692444.1| PREDICTED: facilitated trehalose transporter Tret1-like isoform X1 [Wasmannia auropunctata]	0.99228	-10.5782	2.96364	-3.56933	0.000357899	0.0187993
Contig85439	#N/A	1.30013	-10.5728	2.9516	-3.58204	0.000340922	0.0179743
Contig86096	ref|XP_011881890.1| PREDICTED: uncharacterized protein LOC105569775 [Vollenhovia emeryi]	0.290954	-10.5636	2.96297	-3.56522	0.000363553	0.019075
Contig138843	#N/A	0.376602	-10.5412	2.96181	-3.55905	0.000372196	0.0194778
Contig36583	#N/A	0.313025	-10.5292	2.96067	-3.55635	0.000376037	0.0196435
Contig122272	ref|XP_012060634.1| PREDICTED: uncharacterized protein LOC105623871 [Atta cephalotes]	0.772091	-10.5209	2.95011	-3.56628	0.000362091	0.0190124
Contig95314	#N/A	0.442108	-10.5176	2.96186	-3.55099	0.000383778	0.0200025
Contig33250	#N/A	0.549821	-10.5131	2.76621	-3.80053	0.000144384	0.00836108
Contig39429	ref|XP_011883534.1| PREDICTED: protein unc-13 homolog A-like [Vollenhovia emeryi]	0.271181	-10.512	2.9648	-3.54559	0.000391741	0.0203799
Contig89596	ref|XP_011877510.1| PREDICTED: SID1 transmembrane family member 1-like [Vollenhovia emeryi]	0.607542	-10.5103	2.95714	-3.55419	0.000379138	0.0197825
Contig146004	#N/A	0.39655	-10.51	2.96139	-3.54901	0.000386677	0.0201387
Contig77694	ref|XP_012232431.1| PREDICTED: uncharacterized protein LOC105678035 [Linepithema humile]	0.191225	-10.4925	2.96793	-3.53527	0.000407355	0.021099
Contig109135	ref|XP_014479306.1| PREDICTED: ras-related protein Rab-18-B-like isoform X1 [Dinoponera quadriceps]	0.995053	-10.4876	2.96104	-3.54188	0.000397287	0.0206456
Contig100151	#N/A	0.890347	-10.487	2.96359	-3.5386	0.000402254	0.0208807
Contig20936	#N/A	0.527764	-10.4663	2.95987	-3.53607	0.000406124	0.0210447
Contig93837	#N/A	0.346935	-10.4618	2.96281	-3.53106	0.000413902	0.0213832
Contig147077	ref|XP_011701122.1| PREDICTED: replication factor C subunit 5 [Wasmannia auropunctata]	11.7386	-10.4605	2.94137	-3.55634	0.000376057	0.0196435
Contig116699	ref|XP_011881548.1| PREDICTED: synaptotagmin-5 [Vollenhovia emeryi]	0.859322	-10.4556	2.95926	-3.53319	0.00041057	0.0212266
Contig86407	ref|XP_011695782.1| PREDICTED: WD repeat-containing protein 43 [Wasmannia auropunctata]	1.57669	-10.4512	2.95064	-3.54203	0.000397065	0.0206417
Contig75159	ref|XP_011176247.1| PREDICTED: homeobox protein rough [Solenopsis invicta]	1.48108	-10.4433	2.95644	-3.53238	0.000411838	0.0212844
Contig107799	ref|XP_011691665.1| PREDICTED: uncharacterized protein LOC105452347 isoform X1 [Wasmannia auropunctata]	0.533081	-10.442	2.96359	-3.52342	0.000426018	0.0219868
Contig115608	#N/A	0.436301	-10.4219	2.96171	-3.51888	0.000433368	0.0223236
Contig85353	#N/A	0.28554	-10.4202	2.96414	-3.51543	0.000439047	0.0225914
Contig44152	ref|XP_011861946.1| PREDICTED: probable cardiolipin synthase (CMP-forming) [Vollenhovia emeryi]	0.919323	-10.4177	2.96372	-3.5151	0.000439596	0.0226114
Contig86771	ref|XP_011057096.1| PREDICTED: uncharacterized protein LOC105147640 [Acromyrmex echinatior]	0.297872	-10.4158	2.96051	-3.51826	0.000434389	0.022368
Contig54207	ref|XP_011161663.1| PREDICTED: fatty-acid amide hydrolase 2-like, partial [Solenopsis invicta]	0.94557	-10.407	2.96387	-3.51129	0.000445943	0.0228547
Contig125715	#N/A	0.263183	-10.4038	2.96212	-3.51229	0.000444264	0.02281
Contig46401	ref|XP_011176102.1| PREDICTED: E3 ubiquitin-protein ligase MYCBP2-like [Solenopsis invicta]	0.368302	-10.4015	2.96201	-3.51165	0.000445339	0.0228486
Contig109279	#N/A	0.445924	-10.3994	2.96111	-3.51201	0.000444737	0.022826
Contig97102	ref|XP_394997.2| PREDICTED: general transcription factor IIH subunit 2 [Apis mellifera]	1.90459	-10.3898	1.67549	-6.20105	5.60863e-10	7.74665e-08
Contig63061	ref|XP_011695732.1| PREDICTED: protein bicaudal C isoform X2 [Wasmannia auropunctata]	4.82864	-10.3865	2.96451	-3.50362	0.000458971	0.0234454
Contig104690	#N/A	1.86623	-10.3769	2.9592	-3.50664	0.000453799	0.0231984
Contig134034	ref|XP_011875913.1| PREDICTED: retinoblastoma-like protein 1 isoform X2 [Vollenhovia emeryi]	0.457488	-10.3682	2.96342	-3.49873	0.000467477	0.0238267
Contig64186	#N/A	0.59502	-10.3663	2.96421	-3.49716	0.000470247	0.0239354
Contig90187	#N/A	0.338729	-10.3567	2.964	-3.49415	0.000475566	0.0241712
Contig46030	#N/A	0.406695	-10.3549	2.95956	-3.4988	0.000467357	0.0238267
Contig3874	#N/A	0.564181	-10.3537	2.96308	-3.49422	0.000475442	0.0241712
[truncated: 285 more rows]
