# Supplementary material for: Immune challenge reduces gut microbial diversity and triggers fertility-dependent gene expression changes in a social insect
Source: BMC Genomics. 2020 Nov 23;21:816. doi: 10.1186/s12864-020-07191-9 (PMC7682046; doi:10.1186/s12864-020-07191-9)
Supplement: Supplementary file 1 — Additional file 1. Additional methodological details, Figures S1 and S2 and Table S2. Description of additional supplementary tables (Tables S1, S3-S18) are also provided. [file 12864_2020_7191_MOESM1_ESM.zip › Table_S14.xlsx]

## Sheet: a)
	GO.ID	Term	Annotated	Significant	Expected	Fisher
1	GO:0006811	ion transport	865	28	20.62	0.0047
2	GO:0009166	nucleotide catabolic process	31	4	0.74	0.0060
3	GO:0048870	cell motility	19	3	0.45	0.0098
4	GO:0070966	nuclear-transcribed mRNA catabolic proce...	8	2	0.19	0.0144
5	GO:0071025	RNA surveillance	8	2	0.19	0.0144
6	GO:0070481	nuclear-transcribed mRNA catabolic proce...	8	2	0.19	0.0144
7	GO:0006182	cGMP biosynthetic process	45	4	1.07	0.0220
8	GO:0006007	glucose catabolic process	1	1	0.02	0.0238
9	GO:0006888	ER to Golgi vesicle-mediated transport	28	3	0.67	0.0283
10	GO:0046168	glycerol-3-phosphate catabolic process	12	2	0.29	0.0320
11	GO:0006064	glucuronate catabolic process	2	1	0.05	0.0471
12	GO:0006751	glutathione catabolic process	18	2	0.43	0.0675
13	GO:0006824	cobalt ion transport	3	1	0.07	0.0698
14	GO:0006094	gluconeogenesis	20	2	0.48	0.0813
15	GO:0006629	lipid metabolic process	449	14	10.71	0.0864
16	GO:0055085	transmembrane transport	1134	33	27.04	0.0880
17	GO:0009236	cobalamin biosynthetic process	21	2	0.5	0.0884
18	GO:0030244	cellulose biosynthetic process	4	1	0.1	0.0920
19	GO:0006429	leucyl-tRNA aminoacylation	4	1	0.1	0.0920
20	GO:0007166	cell surface receptor signaling pathway	171	7	4.08	0.0995
21	GO:0007186	G-protein coupled receptor signaling pat...	397	14	9.47	0.1137
22	GO:0006556	S-adenosylmethionine biosynthetic proces...	5	1	0.12	0.1137
23	GO:0048011	neurotrophin TRK receptor signaling path...	5	1	0.12	0.1137
24	GO:0006426	glycyl-tRNA aminoacylation	5	1	0.12	0.1137
25	GO:0006508	proteolysis	1020	28	24.32	0.1163
26	GO:0006414	translational elongation	50	3	1.19	0.1164
27	GO:0007033	vacuole organization	6	1	0.14	0.1348
28	GO:0009231	riboflavin biosynthetic process	6	1	0.14	0.1348
29	GO:0006817	phosphate ion transport	6	1	0.14	0.1348
30	GO:0018342	protein prenylation	28	2	0.67	0.1431
31	GO:0035556	intracellular signal transduction	538	15	12.83	0.1439
32	GO:0019441	tryptophan catabolic process to kynureni...	7	1	0.17	0.1555
33	GO:0043039	tRNA aminoacylation	219	6	5.22	0.1555
34	GO:0000160	phosphorelay signal transduction system	30	2	0.72	0.1598
35	GO:0051205	protein insertion into membrane	8	1	0.19	0.1756
36	GO:0039694	viral RNA genome replication	8	1	0.19	0.1756
37	GO:0009395	phospholipid catabolic process	8	1	0.19	0.1756
38	GO:0033227	dsRNA transport	8	1	0.19	0.1756
39	GO:0006024	glycosaminoglycan biosynthetic process	8	1	0.19	0.1756
40	GO:0080009	mRNA methylation	8	1	0.19	0.1756
41	GO:0009401	phosphoenolpyruvate-dependent sugar phos...	32	2	0.76	0.1768
42	GO:0005978	glycogen biosynthetic process	33	2	0.79	0.1854
43	GO:0007268	chemical synaptic transmission	9	1	0.21	0.1953
44	GO:0071918	urea transmembrane transport	9	1	0.21	0.1953
45	GO:0006814	sodium ion transport	64	3	1.53	0.1960
46	GO:0006397	mRNA processing	142	4	3.39	0.2030
47	GO:0009058	biosynthetic process	2948	66	70.29	0.2066
48	GO:0006006	glucose metabolic process	31	4	0.74	0.2131
49	GO:0032007	negative regulation of TOR signaling	10	1	0.24	0.2145
50	GO:0006177	GMP biosynthetic process	10	1	0.24	0.2145
51	GO:0070897	DNA-templated transcriptional preinitiat...	10	1	0.24	0.2145
52	GO:0006812	cation transport	413	11	9.85	0.2273
53	GO:0006108	malate metabolic process	11	1	0.26	0.2332
54	GO:0015914	phospholipid transport	11	1	0.26	0.2332
55	GO:0070588	calcium ion transmembrane transport	40	2	0.95	0.2470
56	GO:0006376	mRNA splice site selection	12	1	0.29	0.2515
57	GO:0006470	protein dephosphorylation	107	4	2.55	0.2519
58	GO:0006368	transcription elongation from RNA polyme...	13	1	0.31	0.2694
59	GO:0051103	DNA ligation involved in DNA repair	13	1	0.31	0.2694
60	GO:0042545	cell wall modification	13	1	0.31	0.2694
61	GO:0007017	microtubule-based process	217	4	5.17	0.2760
62	GO:0008643	carbohydrate transport	46	3	1.1	0.2859
63	GO:0009312	oligosaccharide biosynthetic process	14	1	0.33	0.2868
64	GO:0051301	cell division	16	1	0.38	0.3204
65	GO:0009116	nucleoside metabolic process	95	3	2.27	0.3268
66	GO:0006801	superoxide metabolic process	17	1	0.41	0.3367
67	GO:0006013	mannose metabolic process	17	1	0.41	0.3367
68	GO:0050909	sensory perception of taste	17	1	0.41	0.3367
69	GO:0016226	iron-sulfur cluster assembly	18	1	0.43	0.3525
70	GO:0006979	response to oxidative stress	52	2	1.24	0.3529
71	GO:0042254	ribosome biogenesis	90	3	2.15	0.3633
72	GO:0006487	protein N-linked glycosylation	19	1	0.45	0.3680
73	GO:0006438	valyl-tRNA aminoacylation	19	1	0.45	0.3680
74	GO:0006260	DNA replication	236	6	5.63	0.3737
75	GO:0008218	bioluminescence	20	1	0.48	0.3830
76	GO:0046856	phosphatidylinositol dephosphorylation	20	1	0.48	0.3830
77	GO:0006810	transport	2608	74	62.18	0.3843
78	GO:0007205	protein kinase C-activating G-protein co...	22	1	0.52	0.4122
79	GO:0005975	carbohydrate metabolic process	736	23	17.55	0.4135
80	GO:0009072	aromatic amino acid family metabolic pro...	36	2	0.86	0.4256
81	GO:0045892	negative regulation of transcription, DN...	23	1	0.55	0.4262
82	GO:0006400	tRNA modification	62	2	1.48	0.4372
83	GO:0006415	translational termination	24	1	0.57	0.4399
84	GO:0006730	one-carbon metabolic process	25	1	0.6	0.4533
85	GO:0006914	autophagy	25	1	0.6	0.4533
86	GO:0006614	SRP-dependent cotranslational protein ta...	25	1	0.6	0.4533
87	GO:0000723	telomere maintenance	28	1	0.67	0.4915
88	GO:0042147	retrograde transport, endosome to Golgi	28	1	0.67	0.4915
89	GO:0006289	nucleotide-excision repair	30	1	0.72	0.5155
90	GO:0008654	phospholipid biosynthetic process	73	2	1.74	0.5225
91	GO:0006412	translation	733	20	17.48	0.5228
92	GO:0006139	nucleobase-containing compound metabolic...	3385	67	80.71	0.5272
93	GO:0016055	Wnt signaling pathway	32	1	0.76	0.5384
94	GO:0043401	steroid hormone mediated signaling pathw...	32	1	0.76	0.5384
95	GO:0009190	cyclic nucleotide biosynthetic process	85	5	2.03	0.5573
96	GO:0007020	microtubule nucleation	34	1	0.81	0.5602
97	GO:0071805	potassium ion transmembrane transport	35	1	0.83	0.5707
98	GO:0006479	protein methylation	36	1	0.86	0.5810
99	GO:0032259	methylation	108	3	2.58	0.5907
100	GO:0046854	phosphatidylinositol phosphorylation	37	1	0.88	0.5910
101	GO:0006265	DNA topological change	38	1	0.91	0.6008
102	GO:0006520	cellular amino acid metabolic process	429	9	10.23	0.6022
103	GO:0006886	intracellular protein transport	331	7	7.89	0.6026
104	GO:0006413	translational initiation	39	1	0.93	0.6103
105	GO:0006836	neurotransmitter transport	86	2	2.05	0.6116
106	GO:0001522	pseudouridine synthesis	45	1	1.07	0.6630
107	GO:0016570	histone modification	45	1	1.07	0.6630
108	GO:0046488	phosphatidylinositol metabolic process	103	3	2.46	0.6704
109	GO:0006807	nitrogen compound metabolic process	4469	92	106.56	0.6762
110	GO:0045454	cell redox homeostasis	98	2	2.34	0.6821
111	GO:0006313	transposition, DNA-mediated	199	4	4.74	0.7024
112	GO:0006511	ubiquitin-dependent protein catabolic pr...	153	3	3.65	0.7106
113	GO:0007165	signal transduction	1420	39	33.86	0.7143
114	GO:0016579	protein deubiquitination	105	2	2.5	0.7182
115	GO:0007155	cell adhesion	106	2	2.53	0.7231
116	GO:0055114	oxidation-reduction process	1668	37	39.77	0.7254
117	GO:0008272	sulfate transport	54	1	1.29	0.7290
118	GO:0006887	exocytosis	54	1	1.29	0.7290
119	GO:0009165	nucleotide biosynthetic process	248	7	5.91	0.7340
120	GO:0019752	carboxylic acid metabolic process	607	13	14.47	0.7430
121	GO:0006396	RNA processing	505	10	12.04	0.7483
122	GO:0006813	potassium ion transport	98	2	2.34	0.7819
123	GO:0015031	protein transport	397	8	9.47	0.7982
124	GO:0007608	sensory perception of smell	67	1	1.6	0.8022
125	GO:0006096	glycolytic process	68	1	1.62	0.8069
126	GO:0006261	DNA-dependent DNA replication	68	1	1.62	0.8069
127	GO:0008152	metabolic process	10114	232	241.15	0.8121
128	GO:0003333	amino acid transmembrane transport	74	1	1.76	0.8331
129	GO:0006468	protein phosphorylation	871	17	20.77	0.8357
130	GO:0008610	lipid biosynthetic process	149	3	3.55	0.8408
131	GO:0008033	tRNA processing	144	3	3.43	0.8621
132	GO:0006351	transcription, DNA-templated	943	12	22.48	0.8764
133	GO:0006869	lipid transport	98	2	2.34	0.8777
134	GO:0006310	DNA recombination	308	5	7.34	0.9291
135	GO:0015074	DNA integration	359	5	8.56	0.9329
136	GO:0006418	tRNA aminoacylation for protein translat...	212	5	5.05	0.9348
137	GO:0007049	cell cycle	117	1	2.79	0.9413
138	GO:0007018	microtubule-based movement	119	1	2.84	0.9441
139	GO:0016192	vesicle-mediated transport	296	6	7.06	0.9668
140	GO:0006281	DNA repair	260	4	6.2	0.9670
141	GO:0006464	cellular protein modification process	1466	29	34.95	0.9841
142	GO:0006355	regulation of transcription, DNA-templat...	747	9	17.81	0.9963
143	GO:0022610	biological adhesion	107	2	2.55	1.0000
144	GO:0000041	transition metal ion transport	7	1	0.17	1.0000
145	GO:0022613	ribonucleoprotein complex biogenesis	120	4	2.86	1.0000
146	GO:0023057	negative regulation of signaling	13	1	0.31	1.0000
147	GO:0044242	cellular lipid catabolic process	12	1	0.29	1.0000
148	GO:0070727	cellular macromolecule localization	346	8	8.25	1.0000
149	GO:0007267	cell-cell signaling	42	2	1	1.0000
150	GO:0022618	ribonucleoprotein complex assembly	34	1	0.81	1.0000
151	GO:0044248	cellular catabolic process	399	15	9.51	1.0000
152	GO:0044249	cellular biosynthetic process	2769	56	66.02	1.0000
153	GO:0000271	polysaccharide biosynthetic process	42	3	1	1.0000
154	GO:0009074	aromatic amino acid family catabolic pro...	9	1	0.21	1.0000
155	GO:0006399	tRNA metabolic process	363	9	8.66	1.0000
156	GO:0046218	indolalkylamine catabolic process	7	1	0.17	1.0000
157	GO:0007010	cytoskeleton organization	109	1	2.6	1.0000
158	GO:0009451	RNA modification	133	4	3.17	1.0000
159	GO:0072348	sulfur compound transport	55	1	1.31	1.0000
160	GO:0009260	ribonucleotide biosynthetic process	144	5	3.43	1.0000
161	GO:0099536	synaptic signaling	9	1	0.21	1.0000
162	GO:0044237	cellular metabolic process	6455	137	153.91	1.0000
163	GO:0099537	trans-synaptic signaling	9	1	0.21	1.0000
164	GO:0044238	primary metabolic process	7462	172	177.92	1.0000
165	GO:0046434	organophosphate catabolic process	66	7	1.57	1.0000
166	GO:0043170	macromolecule metabolic process	5828	123	138.96	1.0000
167	GO:1902531	regulation of intracellular signal trans...	154	1	3.67	1.0000
168	GO:0043171	peptide catabolic process	18	2	0.43	1.0000
169	GO:1902532	negative regulation of intracellular sig...	10	1	0.24	1.0000
170	GO:0019362	pyridine nucleotide metabolic process	101	1	2.41	1.0000
171	GO:0000226	microtubule cytoskeleton organization	55	1	1.31	1.0000
172	GO:0050657	nucleic acid transport	17	1	0.41	1.0000
173	GO:0050658	RNA transport	17	1	0.41	1.0000
174	GO:1901657	glycosyl compound metabolic process	95	3	2.27	1.0000
175	GO:0051603	proteolysis involved in cellular protein...	180	3	4.29	1.0000
176	GO:0009250	glucan biosynthetic process	40	3	0.95	1.0000
177	GO:1901659	glycosyl compound biosynthetic process	35	1	0.83	1.0000
178	GO:0045184	establishment of protein localization	405	9	9.66	1.0000
179	GO:0072521	purine-containing compound metabolic pro...	278	6	6.63	1.0000
180	GO:0006605	protein targeting	68	1	1.62	1.0000
181	GO:0072522	purine-containing compound biosynthetic ...	167	5	3.98	1.0000
182	GO:0070972	protein localization to endoplasmic reti...	26	1	0.62	1.0000
183	GO:0050877	neurological system process	92	2	2.19	1.0000
184	GO:0072524	pyridine-containing compound metabolic p...	110	1	2.62	1.0000
185	GO:0006790	sulfur compound metabolic process	112	4	2.67	1.0000
186	GO:0032870	cellular response to hormone stimulus	35	1	0.83	1.0000
187	GO:0009259	ribonucleotide metabolic process	242	6	5.77	1.0000
188	GO:0005976	polysaccharide metabolic process	43	3	1.03	1.0000
189	GO:0044403	symbiosis, encompassing mutualism throug...	11	1	0.26	1.0000
190	GO:0005977	glycogen metabolic process	33	2	0.79	1.0000
191	GO:0006793	phosphorus metabolic process	1685	39	40.18	1.0000
192	GO:0010556	regulation of macromolecule biosynthetic...	769	9	18.34	1.0000
193	GO:0015672	monovalent inorganic cation transport	243	5	5.79	1.0000
194	GO:0052652	cyclic purine nucleotide metabolic proce...	51	4	1.22	1.0000
195	GO:0006796	phosphate-containing compound metabolic ...	1676	39	39.96	1.0000
196	GO:0030243	cellulose metabolic process	4	1	0.1	1.0000
197	GO:0010558	negative regulation of macromolecule bio...	32	1	0.76	1.0000
198	GO:0030001	metal ion transport	257	8	6.13	1.0000
199	GO:0031163	metallo-sulfur cluster assembly	18	1	0.43	1.0000
200	GO:0072511	divalent inorganic cation transport	60	3	1.43	1.0000
201	GO:0006366	transcription from RNA polymerase II pro...	95	1	2.27	1.0000
202	GO:0000245	spliceosomal complex assembly	20	1	0.48	1.0000
203	GO:0008104	protein localization	412	9	9.82	1.0000
204	GO:0046834	lipid phosphorylation	37	1	0.88	1.0000
205	GO:0048583	regulation of response to stimulus	196	1	4.67	1.0000
206	GO:0048585	negative regulation of response to stimu...	13	1	0.31	1.0000
207	GO:0046839	phospholipid dephosphorylation	20	1	0.48	1.0000
208	GO:0006352	DNA-templated transcription, initiation	62	1	1.48	1.0000
209	GO:0006354	DNA-templated transcription, elongation	17	1	0.41	1.0000
210	GO:0040011	locomotion	19	3	0.45	1.0000
211	GO:0042451	purine nucleoside biosynthetic process	31	1	0.74	1.0000
212	GO:0006163	purine nucleotide metabolic process	260	6	6.2	1.0000
213	GO:0015840	urea transport	9	1	0.21	1.0000
214	GO:0006164	purine nucleotide biosynthetic process	155	5	3.7	1.0000
215	GO:0042455	ribonucleoside biosynthetic process	35	1	0.83	1.0000
216	GO:0016051	carbohydrate biosynthetic process	91	6	2.17	1.0000
217	GO:0006165	nucleoside diphosphate phosphorylation	82	1	1.96	1.0000
218	GO:0016052	carbohydrate catabolic process	76	3	1.81	1.0000
219	GO:0016054	organic acid catabolic process	43	2	1.03	1.0000
220	GO:0009889	regulation of biosynthetic process	769	9	18.34	1.0000
221	GO:0032006	regulation of TOR signaling	15	1	0.36	1.0000
222	GO:0022607	cellular component assembly	230	4	5.48	1.0000
223	GO:0014070	response to organic cyclic compound	32	1	0.76	1.0000
224	GO:0015849	organic acid transport	120	1	2.86	1.0000
225	GO:0044802	single-organism membrane organization	38	1	0.91	1.0000
226	GO:0019755	one-carbon compound transport	9	1	0.21	1.0000
227	GO:0060255	regulation of macromolecule metabolic pr...	835	11	19.91	1.0000
228	GO:0019320	hexose catabolic process	4	1	0.1	1.0000
229	GO:0015833	peptide transport	410	8	9.78	1.0000
230	GO:0046390	ribose phosphate biosynthetic process	144	5	3.43	1.0000
231	GO:0006766	vitamin metabolic process	45	3	1.07	1.0000
232	GO:0006767	water-soluble vitamin metabolic process	45	3	1.07	1.0000
233	GO:0048523	negative regulation of cellular process	81	2	1.93	1.0000
234	GO:0031323	regulation of cellular metabolic process	802	9	19.12	1.0000
235	GO:0031324	negative regulation of cellular metaboli...	36	1	0.86	1.0000
236	GO:0046395	carboxylic acid catabolic process	43	2	1.03	1.0000
237	GO:0031326	regulation of cellular biosynthetic proc...	769	9	18.34	1.0000
238	GO:0031327	negative regulation of cellular biosynth...	32	1	0.76	1.0000
239	GO:0051186	cofactor metabolic process	251	3	5.98	1.0000
240	GO:0051188	cofactor biosynthetic process	148	2	3.53	1.0000
241	GO:0016070	RNA metabolic process	1762	32	42.01	1.0000
242	GO:0016071	mRNA metabolic process	193	7	4.6	1.0000
243	GO:0006996	organelle organization	386	5	9.2	1.0000
244	GO:0006753	nucleoside phosphate metabolic process	413	12	9.85	1.0000
245	GO:0006757	ATP generation from ADP	68	1	1.62	1.0000
246	GO:0030203	glycosaminoglycan metabolic process	38	1	0.91	1.0000
247	GO:0019318	hexose metabolic process	83	5	1.98	1.0000
248	GO:0051171	regulation of nitrogen compound metaboli...	771	9	18.38	1.0000
249	GO:0019319	hexose biosynthetic process	20	2	0.48	1.0000
250	GO:0051172	negative regulation of nitrogen compound...	32	1	0.76	1.0000
251	GO:0071822	protein complex subunit organization	162	2	3.86	1.0000
252	GO:0006568	tryptophan metabolic process	11	1	0.26	1.0000
253	GO:0071824	protein-DNA complex subunit organization	29	1	0.69	1.0000
254	GO:0006569	tryptophan catabolic process	7	1	0.17	1.0000
255	GO:0048519	negative regulation of biological proces...	125	4	2.98	1.0000
256	GO:0006325	chromatin organization	70	1	1.67	1.0000
257	GO:0071826	ribonucleoprotein complex subunit organi...	46	1	1.1	1.0000
258	GO:0051179	localization	2649	78	63.16	1.0000
259	GO:0019585	glucuronate metabolic process	2	1	0.05	1.0000
260	GO:0033692	cellular polysaccharide biosynthetic pro...	40	3	0.95	1.0000
261	GO:0042278	purine nucleoside metabolic process	41	1	0.98	1.0000
262	GO:0048545	response to steroid hormone	32	1	0.76	1.0000
263	GO:0042886	amide transport	420	9	10.01	1.0000
264	GO:0016482	cytosolic transport	28	1	0.67	1.0000
265	GO:0052646	alditol phosphate metabolic process	29	2	0.69	1.0000
266	GO:0000398	mRNA splicing, via spliceosome	77	1	1.84	1.0000
267	GO:0032200	telomere organization	28	1	0.67	1.0000
268	GO:0019725	cellular homeostasis	118	2	2.81	1.0000
269	GO:0009235	cobalamin metabolic process	22	2	0.52	1.0000
270	GO:0042221	response to chemical	84	2	2	1.0000
271	GO:0006771	riboflavin metabolic process	6	1	0.14	1.0000
272	GO:1905114	cell surface receptor signaling pathway ...	32	1	0.76	1.0000
273	GO:0070085	glycosylation	72	1	1.72	1.0000
274	GO:0071840	cellular component organization or bioge...	696	14	16.6	1.0000
275	GO:0046364	monosaccharide biosynthetic process	20	2	0.48	1.0000
276	GO:0046365	monosaccharide catabolic process	6	2	0.14	1.0000
277	GO:0006586	indolalkylamine metabolic process	11	1	0.26	1.0000
278	GO:0055086	nucleobase-containing small molecule met...	474	14	11.3	1.0000
279	GO:0006112	energy reserve metabolic process	33	2	0.79	1.0000
280	GO:0016042	lipid catabolic process	20	1	0.48	1.0000
281	GO:0016043	cellular component organization	605	11	14.43	1.0000
282	GO:0033013	tetrapyrrole metabolic process	74	2	1.76	1.0000
283	GO:0080090	regulation of primary metabolic process	791	9	18.86	1.0000
284	GO:0033014	tetrapyrrole biosynthetic process	71	2	1.69	1.0000
285	GO:0006725	cellular aromatic compound metabolic pro...	3527	71	84.1	1.0000
286	GO:0097659	nucleic acid-templated transcription	943	12	22.48	1.0000
287	GO:0044763	single-organism cellular process	2468	59	58.85	1.0000
288	GO:0044764	multi-organism cellular process	12	1	0.29	1.0000
289	GO:0042219	cellular modified amino acid catabolic p...	21	2	0.5	1.0000
290	GO:0044765	single-organism transport	613	13	14.62	1.0000
291	GO:0006575	cellular modified amino acid metabolic p...	56	2	1.34	1.0000
292	GO:0098916	anterograde trans-synaptic signaling	9	1	0.21	1.0000
293	GO:0006576	cellular biogenic amine metabolic proces...	30	1	0.72	1.0000
294	GO:0006950	response to stress	401	6	9.56	1.0000
295	GO:0042430	indole-containing compound metabolic pro...	11	1	0.26	1.0000
296	GO:0032196	transposition	199	4	4.74	1.0000
297	GO:0060249	anatomical structure homeostasis	28	1	0.67	1.0000
298	GO:0051716	cellular response to stimulus	1693	43	40.37	1.0000
299	GO:0042436	indole-containing compound catabolic pro...	7	1	0.17	1.0000
300	GO:0016032	viral process	11	1	0.26	1.0000
301	GO:0043933	macromolecular complex subunit organizat...	237	4	5.65	1.0000
302	GO:1901605	alpha-amino acid metabolic process	145	1	3.46	1.0000
303	GO:1901606	alpha-amino acid catabolic process	30	1	0.72	1.0000
304	GO:0071407	cellular response to organic cyclic comp...	32	1	0.76	1.0000
305	GO:0050794	regulation of cellular process	2331	49	55.58	1.0000
306	GO:0001510	RNA methylation	31	1	0.74	1.0000
307	GO:0009205	purine ribonucleoside triphosphate metab...	137	1	3.27	1.0000
308	GO:1901360	organic cyclic compound metabolic proces...	3567	72	85.05	1.0000
309	GO:2001141	regulation of RNA biosynthetic process	747	9	17.81	1.0000
310	GO:1901361	organic cyclic compound catabolic proces...	114	7	2.72	1.0000
311	GO:1901362	organic cyclic compound biosynthetic pro...	1395	22	33.26	1.0000
312	GO:0030163	protein catabolic process	190	3	4.53	1.0000
313	GO:0097435	supramolecular fiber organization	58	1	1.38	1.0000
314	GO:0033036	macromolecule localization	527	12	12.57	1.0000
315	GO:0007600	sensory perception	92	2	2.19	1.0000
316	GO:0006749	glutathione metabolic process	43	2	1.03	1.0000
317	GO:0045934	negative regulation of nucleobase-contai...	24	1	0.57	1.0000
318	GO:0006518	peptide metabolic process	785	22	18.72	1.0000
319	GO:0007606	sensory perception of chemical stimulus	84	2	2	1.0000
320	GO:0006974	cellular response to DNA damage stimulus	272	4	6.49	1.0000
321	GO:0031929	TOR signaling	15	1	0.36	1.0000
322	GO:0071396	cellular response to lipid	32	1	0.76	1.0000
323	GO:0006732	coenzyme metabolic process	194	2	4.63	1.0000
324	GO:0006733	oxidoreduction coenzyme metabolic proces...	118	1	2.81	1.0000
325	GO:0090407	organophosphate biosynthetic process	349	9	8.32	1.0000
326	GO:0019538	protein metabolic process	3137	75	74.8	1.0000
327	GO:0071804	cellular potassium ion transport	35	1	0.83	1.0000
328	GO:0070271	protein complex biogenesis	135	1	3.22	1.0000
329	GO:0009199	ribonucleoside triphosphate metabolic pr...	139	1	3.31	1.0000
330	GO:0042402	cellular biogenic amine catabolic proces...	7	1	0.17	1.0000
331	GO:0006090	pyruvate metabolic process	72	1	1.72	1.0000
332	GO:0006091	generation of precursor metabolites and ...	144	3	3.43	1.0000
333	GO:0031109	microtubule polymerization or depolymeri...	35	1	0.83	1.0000
334	GO:0046785	microtubule polymerization	34	1	0.81	1.0000
335	GO:0006928	movement of cell or subcellular componen...	138	4	3.29	1.0000
336	GO:0019941	modification-dependent protein catabolic...	153	3	3.65	1.0000
337	GO:0070887	cellular response to chemical stimulus	55	2	1.31	1.0000
338	GO:0044723	single-organism carbohydrate metabolic p...	265	11	6.32	1.0000
339	GO:0044724	single-organism carbohydrate catabolic p...	76	3	1.81	1.0000
340	GO:1902679	negative regulation of RNA biosynthetic ...	23	1	0.55	1.0000
341	GO:0000375	RNA splicing, via transesterification re...	77	1	1.84	1.0000
342	GO:0010467	gene expression	2231	44	53.19	1.0000
343	GO:0000377	RNA splicing, via transesterification re...	77	1	1.84	1.0000
344	GO:0010468	regulation of gene expression	809	11	19.29	1.0000
345	GO:0046128	purine ribonucleoside metabolic process	41	1	0.98	1.0000
346	GO:0046129	purine ribonucleoside biosynthetic proce...	31	1	0.74	1.0000
347	GO:0007167	enzyme linked receptor protein signaling...	38	1	0.91	1.0000
348	GO:0008213	protein alkylation	36	1	0.86	1.0000
349	GO:0044710	single-organism metabolic process	3406	89	81.21	1.0000
350	GO:0044711	single-organism biosynthetic process	697	19	16.62	1.0000
351	GO:0007169	transmembrane receptor protein tyrosine ...	25	1	0.6	1.0000
352	GO:0044712	single-organism catabolic process	196	9	4.67	1.0000

## Sheet: b)
	GO.ID	Term	Annotated	Significant	Expected	Fisher
1	GO:0006811	ion transport	865	14	8.44	0.0085
2	GO:0048870	cell motility	19	2	0.19	0.0145
3	GO:0006064	glucuronate catabolic process	2	1	0.02	0.0194
4	GO:0000160	phosphorelay signal transduction system	30	2	0.29	0.0344
5	GO:0006429	leucyl-tRNA aminoacylation	4	1	0.04	0.0385
6	GO:0009401	phosphoenolpyruvate-dependent sugar phos...	32	2	0.31	0.0387
7	GO:0006426	glycyl-tRNA aminoacylation	5	1	0.05	0.0478
8	GO:0006556	S-adenosylmethionine biosynthetic proces...	5	1	0.05	0.0478
9	GO:0048011	neurotrophin TRK receptor signaling path...	5	1	0.05	0.0478
10	GO:0006817	phosphate ion transport	6	1	0.06	0.0571
11	GO:0007033	vacuole organization	6	1	0.06	0.0571
12	GO:0009231	riboflavin biosynthetic process	6	1	0.06	0.0571
13	GO:0019441	tryptophan catabolic process to kynureni...	7	1	0.07	0.0663
14	GO:0009395	phospholipid catabolic process	8	1	0.08	0.0754
15	GO:0039694	viral RNA genome replication	8	1	0.08	0.0754
16	GO:0006024	glycosaminoglycan biosynthetic process	8	1	0.08	0.0754
17	GO:0032007	negative regulation of TOR signaling	10	1	0.1	0.0934
18	GO:0006414	translational elongation	54	2	0.53	0.0974
19	GO:0015914	phospholipid transport	11	1	0.11	0.1022
20	GO:0006376	mRNA splice site selection	12	1	0.12	0.1110
21	GO:0006397	mRNA processing	142	3	1.39	0.1320
22	GO:0051301	cell division	16	1	0.16	0.1452
23	GO:0006812	cation transport	413	4	4.03	0.1479
24	GO:0006801	superoxide metabolic process	17	1	0.17	0.1536
25	GO:0006139	nucleobase-containing compound metabolic...	3383	26	33	0.1668
26	GO:0006438	valyl-tRNA aminoacylation	19	1	0.19	0.1700
27	GO:0046856	phosphatidylinositol dephosphorylation	20	1	0.2	0.1781
28	GO:0006094	gluconeogenesis	20	1	0.2	0.1781
29	GO:0009236	cobalamin biosynthetic process	21	1	0.2	0.1862
30	GO:0006511	ubiquitin-dependent protein catabolic pr...	153	3	1.49	0.1879
31	GO:0045892	negative regulation of transcription, DN...	23	1	0.22	0.2020
32	GO:0006415	translational termination	24	1	0.23	0.2098
33	GO:0006914	autophagy	25	1	0.24	0.2175
34	GO:0009116	nucleoside metabolic process	95	2	0.93	0.2370
35	GO:0042147	retrograde transport, endosome to Golgi	28	1	0.27	0.2402
36	GO:0018342	protein prenylation	28	1	0.27	0.2402
37	GO:0045454	cell redox homeostasis	98	2	0.96	0.2479
38	GO:0006289	nucleotide-excision repair	30	1	0.29	0.2550
39	GO:0006412	translation	737	13	7.19	0.2601
40	GO:0007166	cell surface receptor signaling pathway	171	4	1.67	0.2625
41	GO:0016055	Wnt signaling pathway	32	1	0.31	0.2695
42	GO:0016579	protein deubiquitination	105	2	1.02	0.2732
43	GO:0006470	protein dephosphorylation	107	2	1.04	0.2804
44	GO:0046854	phosphatidylinositol phosphorylation	37	1	0.36	0.3045
45	GO:0006520	cellular amino acid metabolic process	429	6	4.18	0.3091
46	GO:0001522	pseudouridine synthesis	45	1	0.44	0.3571
47	GO:0009058	biosynthetic process	2947	30	28.75	0.3573
48	GO:0046488	phosphatidylinositol metabolic process	103	3	1	0.3605
49	GO:0006807	nitrogen compound metabolic process	6768	59	66.02	0.3778
50	GO:0006979	response to oxidative stress	52	1	0.51	0.3999
51	GO:0008272	sulfate transport	54	1	0.53	0.4116
52	GO:0006887	exocytosis	54	1	0.53	0.4116
53	GO:0055085	transmembrane transport	1139	12	11.11	0.4343
54	GO:0006400	tRNA modification	62	1	0.6	0.4561
55	GO:0006814	sodium ion transport	64	1	0.62	0.4667
56	GO:0015031	protein transport	397	2	3.87	0.4825
57	GO:0006261	DNA-dependent DNA replication	68	1	0.66	0.4873
58	GO:0006260	DNA replication	236	3	2.3	0.4884
59	GO:0008654	phospholipid biosynthetic process	73	1	0.71	0.5119
60	GO:0006508	proteolysis	1020	11	9.95	0.5283
61	GO:0007186	G-protein coupled receptor signaling pat...	397	4	3.87	0.5445
62	GO:0008033	tRNA processing	144	2	1.4	0.5524
63	GO:0005975	carbohydrate metabolic process	736	7	7.18	0.5653
64	GO:0006351	transcription, DNA-templated	943	6	9.2	0.5856
65	GO:0042254	ribosome biogenesis	90	1	0.88	0.5872
66	GO:0006813	potassium ion transport	98	1	0.96	0.6186
67	GO:0007155	cell adhesion	106	1	1.03	0.6475
68	GO:0032259	methylation	108	1	1.05	0.6544
69	GO:0008152	metabolic process	10111	94	98.62	0.6671
70	GO:0006810	transport	2608	30	25.44	0.6833
71	GO:0007049	cell cycle	117	1	1.14	0.6838
72	GO:0007018	microtubule-based movement	119	1	1.16	0.6900
73	GO:0007165	signal transduction	1420	14	13.85	0.7203
74	GO:0006629	lipid metabolic process	449	6	4.38	0.7862
75	GO:0006396	RNA processing	504	6	4.92	0.7916
76	GO:0006418	tRNA aminoacylation for protein translat...	212	4	2.07	0.8314
77	GO:0006313	transposition, DNA-mediated	199	1	1.94	0.8597
78	GO:0035556	intracellular signal transduction	538	5	5.25	0.8604
79	GO:0055114	oxidation-reduction process	1668	12	16.27	0.9009
80	GO:0006886	intracellular protein transport	331	1	3.23	0.9624
81	GO:0015074	DNA integration	359	1	3.5	0.9716
82	GO:0006468	protein phosphorylation	871	4	8.5	0.9737
83	GO:0006355	regulation of transcription, DNA-templat...	747	4	7.29	0.9741
84	GO:0046903	secretion	83	1	0.81	1.0000
85	GO:0051716	cellular response to stimulus	1696	15	16.54	1.0000
86	GO:0034660	ncRNA metabolic process	417	6	4.07	1.0000
87	GO:0006771	riboflavin metabolic process	6	1	0.06	1.0000
88	GO:0046907	intracellular transport	390	2	3.8	1.0000
89	GO:0000245	spliceosomal complex assembly	20	1	0.2	1.0000
90	GO:0010033	response to organic substance	64	1	0.62	1.0000
91	GO:0030163	protein catabolic process	190	3	1.85	1.0000
92	GO:0009889	regulation of biosynthetic process	773	4	7.54	1.0000
93	GO:0043038	amino acid activation	219	4	2.14	1.0000
94	GO:0006259	DNA metabolic process	1094	6	10.67	1.0000
95	GO:0071363	cellular response to growth factor stimu...	17	1	0.17	1.0000
96	GO:0043039	tRNA aminoacylation	219	4	2.14	1.0000
97	GO:0019318	hexose metabolic process	83	1	0.81	1.0000
98	GO:0019319	hexose biosynthetic process	20	1	0.2	1.0000
99	GO:0051186	cofactor metabolic process	251	1	2.45	1.0000
100	GO:0019438	aromatic compound biosynthetic process	1353	7	13.2	1.0000
101	GO:0051188	cofactor biosynthetic process	148	1	1.44	1.0000
102	GO:0044106	cellular amine metabolic process	34	1	0.33	1.0000
103	GO:0019941	modification-dependent protein catabolic...	153	3	1.49	1.0000
104	GO:0019439	aromatic compound catabolic process	107	1	1.04	1.0000
105	GO:0006281	DNA repair	260	1	2.54	1.0000
106	GO:0050896	response to stimulus	1832	16	17.87	1.0000
107	GO:0016070	RNA metabolic process	1760	17	17.17	1.0000
108	GO:0055086	nucleobase-containing small molecule met...	474	2	4.62	1.0000
109	GO:0016071	mRNA metabolic process	193	3	1.88	1.0000
110	GO:0033036	macromolecule localization	527	3	5.14	1.0000
111	GO:1901657	glycosyl compound metabolic process	95	2	0.93	1.0000
112	GO:0030001	metal ion transport	257	2	2.51	1.0000
113	GO:0006725	cellular aromatic compound metabolic pro...	3525	28	34.38	1.0000
114	GO:0006996	organelle organization	388	1	3.78	1.0000
115	GO:0034654	nucleobase-containing compound biosynthe...	1242	6	12.11	1.0000
116	GO:0051171	regulation of nitrogen compound metaboli...	795	4	7.75	1.0000
117	GO:0032984	macromolecular complex disassembly	41	1	0.4	1.0000
118	GO:0051172	negative regulation of nitrogen compound...	32	1	0.31	1.0000
119	GO:0015711	organic anion transport	133	1	1.3	1.0000
120	GO:0008380	RNA splicing	94	1	0.92	1.0000
121	GO:0044085	cellular component biogenesis	321	2	3.13	1.0000
122	GO:0006399	tRNA metabolic process	363	6	3.54	1.0000
123	GO:0051179	localization	2649	32	25.84	1.0000
124	GO:0015833	peptide transport	410	2	4	1.0000
125	GO:1901564	organonitrogen compound metabolic proces...	4026	38	39.27	1.0000
126	GO:1901565	organonitrogen compound catabolic proces...	292	4	2.85	1.0000
127	GO:0019058	viral life cycle	11	1	0.11	1.0000
128	GO:1901566	organonitrogen compound biosynthetic pro...	1325	16	12.92	1.0000
129	GO:0006006	glucose metabolic process	31	1	0.3	1.0000
130	GO:0044403	symbiosis, encompassing mutualism throug...	11	1	0.11	1.0000
131	GO:0000375	RNA splicing, via transesterification re...	77	1	0.75	1.0000
132	GO:0042592	homeostatic process	160	2	1.56	1.0000
133	GO:0050794	regulation of cellular process	2335	20	22.78	1.0000
134	GO:0000377	RNA splicing, via transesterification re...	77	1	0.75	1.0000
135	GO:0006464	cellular protein modification process	1466	9	14.3	1.0000
136	GO:0043603	cellular amide metabolic process	819	13	7.99	1.0000
137	GO:0043604	amide biosynthetic process	779	13	7.6	1.0000
138	GO:0198738	cell-cell signaling by wnt	32	1	0.31	1.0000
139	GO:0010605	negative regulation of macromolecule met...	76	1	0.74	1.0000
140	GO:0015748	organophosphate ester transport	11	1	0.11	1.0000
141	GO:0071702	organic substance transport	680	5	6.63	1.0000
142	GO:0071704	organic substance metabolic process	7832	72	76.39	1.0000
143	GO:0071705	nitrogen compound transport	530	2	5.17	1.0000
144	GO:0022411	cellular component disassembly	45	1	0.44	1.0000

## Sheet: c)
	GO.ID	Term	Annotated	Significant	Expected	Fisher
1	GO:0055114	oxidation-reduction process	1668	206	95.59	5.2e-30
2	GO:0008152	metabolic process	10111	643	579.42	1.6e-20
3	GO:0035176	social behavior	5	5	0.29	6.1e-07
4	GO:0015937	coenzyme A biosynthetic process	19	7	1.09	5.4e-05
5	GO:0009072	aromatic amino acid family metabolic pro...	36	10	2.06	7.8e-05
6	GO:0032481	positive regulation of type I interferon...	4	3	0.23	0.00072
7	GO:0002218	activation of innate immune response	4	3	0.23	0.00072
8	GO:0006096	glycolytic process	68	11	3.9	0.00156
9	GO:0006013	mannose metabolic process	17	5	0.97	0.00212
10	GO:0006559	L-phenylalanine catabolic process	2	2	0.11	0.00328
11	GO:0008218	bioluminescence	20	5	1.15	0.00460
12	GO:0005975	carbohydrate metabolic process	736	67	42.18	0.00866
13	GO:0046294	formaldehyde catabolic process	3	2	0.17	0.00947
14	GO:0006147	guanine catabolic process	3	2	0.17	0.00947
15	GO:0033499	galactose catabolic process via UDP-gala...	3	2	0.17	0.00947
16	GO:0006189	'de novo' IMP biosynthetic process	10	3	0.57	0.01661
17	GO:0006561	proline biosynthetic process	10	3	0.57	0.01661
18	GO:0051603	proteolysis involved in cellular protein...	180	13	10.31	0.01727
19	GO:0042157	lipoprotein metabolic process	37	4	2.12	0.01821
20	GO:0009116	nucleoside metabolic process	95	10	5.44	0.01867
21	GO:0006520	cellular amino acid metabolic process	429	26	24.58	0.02661
22	GO:0006850	mitochondrial pyruvate transmembrane tra...	5	2	0.29	0.02921
23	GO:0006570	tyrosine metabolic process	5	2	0.29	0.02921
24	GO:0016559	peroxisome fission	5	2	0.29	0.02921
25	GO:0015986	ATP synthesis coupled proton transport	32	5	1.83	0.03396
26	GO:0006012	galactose metabolic process	10	4	0.57	0.05661
27	GO:0070286	axonemal dynein complex assembly	1	1	0.06	0.05731
28	GO:0006471	protein ADP-ribosylation	1	1	0.06	0.05731
29	GO:0016480	negative regulation of transcription fro...	1	1	0.06	0.05731
30	GO:0006695	cholesterol biosynthetic process	1	1	0.06	0.05731
31	GO:0006869	lipid transport	98	10	5.62	0.06749
32	GO:0006629	lipid metabolic process	449	37	25.73	0.06895
33	GO:0009664	plant-type cell wall organization	8	2	0.46	0.07296
34	GO:0009264	deoxyribonucleotide catabolic process	8	2	0.46	0.07296
35	GO:0033227	dsRNA transport	8	2	0.46	0.07296
36	GO:0006207	'de novo' pyrimidine nucleobase biosynth...	8	2	0.46	0.07296
37	GO:0009435	NAD biosynthetic process	9	2	0.52	0.09033
38	GO:0046856	phosphatidylinositol dephosphorylation	20	3	1.15	0.10350
39	GO:0006094	gluconeogenesis	20	3	1.15	0.10350
40	GO:0016055	Wnt signaling pathway	32	4	1.83	0.10821
41	GO:0006631	fatty acid metabolic process	30	3	1.72	0.10880
42	GO:0007096	regulation of exit from mitosis	2	1	0.11	0.11133
43	GO:0044205	'de novo' UMP biosynthetic process	2	1	0.11	0.11133
44	GO:0006064	glucuronate catabolic process	2	1	0.11	0.11133
45	GO:0046470	phosphatidylcholine metabolic process	2	1	0.11	0.11133
46	GO:0019310	inositol catabolic process	2	1	0.11	0.11133
47	GO:0071586	CAAX-box protein processing	2	1	0.11	0.11133
48	GO:0044249	cellular biosynthetic process	2768	88	158.62	0.12253
49	GO:0006006	glucose metabolic process	31	5	1.78	0.12761
50	GO:0046835	carbohydrate phosphorylation	11	2	0.63	0.12807
51	GO:0006108	malate metabolic process	11	2	0.63	0.12807
52	GO:0006388	tRNA splicing, via endonucleolytic cleav...	12	2	0.69	0.14809
53	GO:0009056	catabolic process	536	49	30.72	0.15899
54	GO:0032259	methylation	108	6	6.19	0.16090
55	GO:0042176	regulation of protein catabolic process	3	1	0.17	0.16226
56	GO:0030150	protein import into mitochondrial matrix	3	1	0.17	0.16226
57	GO:0009052	pentose-phosphate shunt, non-oxidative b...	3	1	0.17	0.16226
58	GO:0030328	prenylcysteine catabolic process	3	1	0.17	0.16226
59	GO:0006567	threonine catabolic process	3	1	0.17	0.16226
60	GO:0006644	phospholipid metabolic process	180	14	10.31	0.18361
61	GO:0009058	biosynthetic process	2947	104	168.88	0.19000
62	GO:0006090	pyruvate metabolic process	72	12	4.13	0.20866
63	GO:0009143	nucleoside triphosphate catabolic proces...	4	1	0.23	0.21028
64	GO:0034508	centromere complex assembly	4	1	0.23	0.21028
65	GO:0048268	clathrin coat assembly	4	1	0.23	0.21028
66	GO:0006021	inositol biosynthetic process	15	2	0.86	0.21107
67	GO:0006002	fructose 6-phosphate metabolic process	15	2	0.86	0.21107
68	GO:0032012	regulation of ARF protein signal transdu...	15	2	0.86	0.21107
69	GO:0006777	Mo-molybdopterin cofactor biosynthetic p...	15	2	0.86	0.21107
70	GO:0006030	chitin metabolic process	71	6	4.07	0.22083
71	GO:0009156	ribonucleoside monophosphate biosyntheti...	62	10	3.55	0.25401
72	GO:0050909	sensory perception of taste	17	2	0.97	0.25434
73	GO:0009448	gamma-aminobutyric acid metabolic proces...	5	1	0.29	0.25555
74	GO:0009081	branched-chain amino acid metabolic proc...	5	1	0.29	0.25555
75	GO:0048011	neurotrophin TRK receptor signaling path...	5	1	0.29	0.25555
76	GO:0007160	cell-matrix adhesion	5	1	0.29	0.25555
77	GO:0043401	steroid hormone mediated signaling pathw...	32	3	1.83	0.27695
78	GO:0006950	response to stress	401	16	22.98	0.27755
79	GO:0006099	tricarboxylic acid cycle	19	2	1.09	0.29775
80	GO:0006171	cAMP biosynthetic process	6	1	0.34	0.29822
81	GO:0006879	cellular iron ion homeostasis	6	1	0.34	0.29822
82	GO:0006817	phosphate ion transport	6	1	0.34	0.29822
83	GO:0006796	phosphate-containing compound metabolic ...	1676	92	96.04	0.32215
84	GO:0045454	cell redox homeostasis	98	7	5.62	0.33015
85	GO:0019441	tryptophan catabolic process to kynureni...	7	1	0.4	0.33845
86	GO:0006166	purine ribonucleoside salvage	7	1	0.4	0.33845
87	GO:0060964	regulation of gene silencing by miRNA	7	1	0.4	0.33845
88	GO:0009113	purine nucleobase biosynthetic process	7	1	0.4	0.33845
89	GO:0001678	cellular glucose homeostasis	7	1	0.4	0.33845
90	GO:0009236	cobalamin biosynthetic process	21	2	1.2	0.34076
91	GO:0043039	tRNA aminoacylation	219	3	12.55	0.34187
92	GO:0008654	phospholipid biosynthetic process	73	5	4.18	0.35681
93	GO:0016042	lipid catabolic process	20	2	1.15	0.37627
94	GO:0009395	phospholipid catabolic process	8	1	0.46	0.37638
95	GO:0032324	molybdopterin cofactor biosynthetic proc...	8	1	0.46	0.37638
96	GO:0080009	mRNA methylation	8	1	0.46	0.37638
97	GO:0009166	nucleotide catabolic process	31	4	1.78	0.38202
98	GO:0050482	arachidonic acid secretion	24	2	1.38	0.40354
99	GO:0007268	chemical synaptic transmission	9	1	0.52	0.41214
100	GO:0071918	urea transmembrane transport	9	1	0.52	0.41214
101	GO:0006269	DNA replication, synthesis of RNA primer	9	1	0.52	0.41214
102	GO:0008299	isoprenoid biosynthetic process	41	3	2.35	0.41985
103	GO:0006298	mismatch repair	25	2	1.43	0.42384
104	GO:0007017	microtubule-based process	217	7	12.44	0.42450
105	GO:0009165	nucleotide biosynthetic process	248	27	14.21	0.43612
106	GO:0007034	vacuolar transport	10	1	0.57	0.44585
107	GO:0006545	glycine biosynthetic process	10	1	0.57	0.44585
108	GO:0032007	negative regulation of TOR signaling	10	1	0.57	0.44585
109	GO:0042407	cristae formation	10	1	0.57	0.44585
110	GO:0006434	seryl-tRNA aminoacylation	10	1	0.57	0.44585
111	GO:0006810	transport	2608	120	149.45	0.46385
112	GO:0006098	pentose-phosphate shunt	14	2	0.8	0.47728
113	GO:0046855	inositol phosphate dephosphorylation	11	1	0.63	0.47762
114	GO:0007179	transforming growth factor beta receptor...	11	1	0.63	0.47762
115	GO:0015914	phospholipid transport	11	1	0.63	0.47762
116	GO:0006182	cGMP biosynthetic process	45	3	2.58	0.48073
117	GO:0007172	signal complex assembly	12	1	0.69	0.50758
118	GO:0000077	DNA damage checkpoint	12	1	0.69	0.50758
119	GO:0006370	7-methylguanosine mRNA capping	12	1	0.69	0.50758
120	GO:0006376	mRNA splice site selection	12	1	0.69	0.50758
121	GO:0046168	glycerol-3-phosphate catabolic process	12	1	0.69	0.50758
122	GO:0007186	G-protein coupled receptor signaling pat...	397	23	22.75	0.50960
123	GO:0006783	heme biosynthetic process	30	2	1.72	0.51944
124	GO:0016070	RNA metabolic process	1760	50	100.86	0.53170
125	GO:0006221	pyrimidine nucleotide biosynthetic proce...	31	2	1.78	0.53584
126	GO:0008610	lipid biosynthetic process	149	11	8.54	0.58650
127	GO:0006383	transcription from RNA polymerase III pr...	16	2	0.92	0.58712
128	GO:0009190	cyclic nucleotide biosynthetic process	85	6	4.87	0.58720
129	GO:0016255	attachment of GPI anchor to protein	15	1	0.86	0.58754
130	GO:0035556	intracellular signal transduction	538	25	30.83	0.59389
131	GO:0007155	cell adhesion	106	6	6.07	0.61919
132	GO:0003333	amino acid transmembrane transport	74	4	4.24	0.61935
133	GO:0006506	GPI anchor biosynthetic process	32	2	1.83	0.63345
134	GO:0006801	superoxide metabolic process	17	1	0.97	0.63351
135	GO:0006284	base-excision repair	17	1	0.97	0.63351
136	GO:0055085	transmembrane transport	1139	64	65.27	0.63943
137	GO:0006367	transcription initiation from RNA polyme...	18	1	1.03	0.65453
138	GO:0016226	iron-sulfur cluster assembly	18	1	1.03	0.65453
139	GO:0006751	glutathione catabolic process	18	1	1.03	0.65453
140	GO:0006511	ubiquitin-dependent protein catabolic pr...	153	8	8.77	0.65578
141	GO:0048870	cell motility	19	1	1.09	0.67436
142	GO:0006508	proteolysis	1020	57	58.45	0.67523
143	GO:0051056	regulation of small GTPase mediated sign...	142	5	8.14	0.67572
144	GO:0006633	fatty acid biosynthetic process	20	1	1.15	0.69304
145	GO:0005991	trehalose metabolic process	20	1	1.15	0.69304
146	GO:0000278	mitotic cell cycle	43	2	2.46	0.69318
147	GO:0009966	regulation of signal transduction	189	8	10.83	0.69424
148	GO:0007166	cell surface receptor signaling pathway	171	11	9.8	0.70827
149	GO:0006813	potassium ion transport	98	4	5.62	0.70880
150	GO:0016579	protein deubiquitination	105	5	6.02	0.72609
151	GO:0030001	metal ion transport	257	8	14.73	0.73044
152	GO:0006836	neurotransmitter transport	86	4	4.93	0.73377
153	GO:0001510	RNA methylation	31	2	1.78	0.74268
154	GO:0007049	cell cycle	117	4	6.7	0.77252
155	GO:0007156	homophilic cell adhesion via plasma memb...	27	1	1.55	0.79705
156	GO:0006807	nitrogen compound metabolic process	6768	266	387.84	0.80813
157	GO:0018342	protein prenylation	28	1	1.6	0.80870
158	GO:0006139	nucleobase-containing compound metabolic...	3383	129	193.86	0.82509
159	GO:0006289	nucleotide-excision repair	30	1	1.72	0.83004
160	GO:0009401	phosphoenolpyruvate-dependent sugar phos...	32	1	1.83	0.84900
161	GO:0007020	microtubule nucleation	34	1	1.95	0.86584
162	GO:0071805	potassium ion transmembrane transport	35	1	2.01	0.87355
163	GO:0015031	protein transport	397	7	22.75	0.88371
164	GO:0046854	phosphatidylinositol phosphorylation	37	1	2.12	0.88766
165	GO:0006814	sodium ion transport	64	2	3.67	0.88856
166	GO:0006811	ion transport	865	35	49.57	0.89112
167	GO:0030203	glycosaminoglycan metabolic process	38	1	2.18	0.89411
168	GO:0006396	RNA processing	504	14	28.88	0.90000
169	GO:0006413	translational initiation	39	1	2.23	0.90020
170	GO:0070588	calcium ion transmembrane transport	40	1	2.29	0.90593
171	GO:0001522	pseudouridine synthesis	45	1	2.58	0.93003
172	GO:0015991	ATP hydrolysis coupled proton transport	45	1	2.58	0.93003
173	GO:0007264	small GTPase mediated signal transductio...	221	7	12.66	0.94375
174	GO:0006979	response to oxidative stress	52	1	2.98	0.95377
175	GO:0006397	mRNA processing	142	4	8.14	0.95678
176	GO:0008272	sulfate transport	54	1	3.09	0.95894
177	GO:0006887	exocytosis	54	1	3.09	0.95894
178	GO:0006414	translational elongation	54	1	3.09	0.95894
179	GO:0006259	DNA metabolic process	1094	24	62.69	0.96015
180	GO:0007275	multicellular organism development	57	1	3.27	0.96562
181	GO:0000398	mRNA splicing, via spliceosome	77	2	4.41	0.96564
182	GO:0006400	tRNA modification	62	1	3.55	0.97444
183	GO:0006313	transposition, DNA-mediated	199	6	11.4	0.97456
184	GO:0006486	protein glycosylation	70	2	4.01	0.98304
185	GO:0006812	cation transport	413	14	23.67	0.98369
186	GO:0008033	tRNA processing	144	4	8.25	0.98419
187	GO:0035023	regulation of Rho protein signal transdu...	108	2	6.19	0.98731
188	GO:0007018	microtubule-based movement	119	2	6.82	0.99282
189	GO:0042254	ribosome biogenesis	90	1	5.16	0.99514
190	GO:0007165	signal transduction	1420	68	81.37	0.99654
191	GO:0015074	DNA integration	359	10	20.57	0.99734
192	GO:0016192	vesicle-mediated transport	296	6	16.96	0.99854
193	GO:0006355	regulation of transcription, DNA-templat...	747	25	42.81	0.99922
194	GO:0006351	transcription, DNA-templated	943	28	54.04	0.99965
195	GO:0006468	protein phosphorylation	871	29	49.91	0.99972
196	GO:0006281	DNA repair	260	6	14.9	0.99984
197	GO:0006886	intracellular protein transport	331	5	18.97	0.99992
198	GO:0006260	DNA replication	236	2	13.52	0.99995
199	GO:0006418	tRNA aminoacylation for protein translat...	212	2	12.15	0.99999
200	GO:0006464	cellular protein modification process	1466	43	84.01	0.99999
201	GO:0006412	translation	737	8	42.23	1.00000
202	GO:0046128	purine ribonucleoside metabolic process	41	2	2.35	1.00000
203	GO:0046129	purine ribonucleoside biosynthetic proce...	31	1	1.78	1.00000
204	GO:0044255	cellular lipid metabolic process	269	20	15.42	1.00000
205	GO:0044257	cellular protein catabolic process	180	13	10.31	1.00000
206	GO:0010646	regulation of cell communication	190	8	10.89	1.00000
207	GO:0048523	negative regulation of cellular process	81	4	4.64	1.00000
208	GO:0010648	negative regulation of cell communicatio...	13	1	0.74	1.00000
209	GO:0120031	plasma membrane bounded cell projection ...	5	1	0.29	1.00000
210	GO:0046112	nucleobase biosynthetic process	15	3	0.86	1.00000
211	GO:0046113	nucleobase catabolic process	3	2	0.17	1.00000
212	GO:0044281	small molecule metabolic process	1237	107	70.89	1.00000
213	GO:1901571	fatty acid derivative transport	24	2	1.38	1.00000
214	GO:0120036	plasma membrane bounded cell projection ...	18	1	1.03	1.00000
215	GO:0044282	small molecule catabolic process	63	12	3.61	1.00000
216	GO:0019693	ribose phosphate metabolic process	256	34	14.67	1.00000
217	GO:0044283	small molecule biosynthetic process	225	13	12.89	1.00000
218	GO:0034637	cellular carbohydrate biosynthetic proce...	67	2	3.84	1.00000
219	GO:0046903	secretion	83	3	4.76	1.00000
220	GO:0007178	transmembrane receptor protein serine/th...	13	1	0.74	1.00000
221	GO:0070189	kynurenine metabolic process	7	1	0.4	1.00000
222	GO:1901575	organic substance catabolic process	504	48	28.88	1.00000
223	GO:0019751	polyol metabolic process	46	4	2.64	1.00000
224	GO:1901576	organic substance biosynthetic process	2793	91	160.05	1.00000
225	GO:0019752	carboxylic acid metabolic process	607	45	34.78	1.00000
226	GO:0006403	RNA localization	17	2	0.97	1.00000
227	GO:0031047	gene silencing by RNA	7	1	0.4	1.00000
228	GO:0046907	intracellular transport	390	8	22.35	1.00000
229	GO:0006749	glutathione metabolic process	43	1	2.46	1.00000
230	GO:0019755	one-carbon compound transport	9	1	0.52	1.00000
231	GO:0046098	guanine metabolic process	3	2	0.17	1.00000
232	GO:0097237	cellular response to toxic substance	3	2	0.17	1.00000
233	GO:0044270	cellular nitrogen compound catabolic pro...	111	8	6.36	1.00000
234	GO:0001578	microtubule bundle formation	1	1	0.06	1.00000
235	GO:0048518	positive regulation of biological proces...	74	3	4.24	1.00000
236	GO:0044271	cellular nitrogen compound biosynthetic ...	2145	69	122.92	1.00000
237	GO:0048519	negative regulation of biological proces...	125	4	7.16	1.00000
238	GO:0006732	coenzyme metabolic process	194	24	11.12	1.00000
239	GO:0006733	oxidoreduction coenzyme metabolic proces...	118	15	6.76	1.00000
240	GO:0044273	sulfur compound catabolic process	21	2	1.2	1.00000
241	GO:0098754	detoxification	3	2	0.17	1.00000
242	GO:0046148	pigment biosynthetic process	37	3	2.12	1.00000
243	GO:0040029	regulation of gene expression, epigeneti...	8	1	0.46	1.00000
244	GO:0044275	cellular carbohydrate catabolic process	2	1	0.11	1.00000
245	GO:0071495	cellular response to endogenous stimulus	49	4	2.81	1.00000
246	GO:0008380	RNA splicing	94	4	5.39	1.00000
247	GO:0042168	heme metabolic process	32	2	1.83	1.00000
248	GO:0009725	response to hormone	36	3	2.06	1.00000
249	GO:0006739	NADP metabolic process	21	2	1.2	1.00000
250	GO:0043101	purine-containing compound salvage	10	1	0.57	1.00000
251	GO:0040011	locomotion	19	1	1.09	1.00000
252	GO:0071545	inositol phosphate catabolic process	11	1	0.63	1.00000
253	GO:0046131	pyrimidine ribonucleoside metabolic proc...	19	1	1.09	1.00000
254	GO:0048545	response to steroid hormone	32	3	1.83	1.00000
255	GO:0046132	pyrimidine ribonucleoside biosynthetic p...	18	1	1.03	1.00000
256	GO:0031323	regulation of cellular metabolic process	806	26	46.19	1.00000
257	GO:0046134	pyrimidine nucleoside biosynthetic proce...	18	1	1.03	1.00000
258	GO:0031324	negative regulation of cellular metaboli...	36	2	2.06	1.00000
259	GO:0006626	protein targeting to mitochondrion	14	1	0.8	1.00000
260	GO:0031326	regulation of cellular biosynthetic proc...	773	26	44.3	1.00000
261	GO:0031327	negative regulation of cellular biosynth...	32	2	1.83	1.00000
262	GO:0042158	lipoprotein biosynthetic process	33	2	1.89	1.00000
263	GO:0052646	alditol phosphate metabolic process	29	1	1.66	1.00000
264	GO:0006952	defense response	13	3	0.74	1.00000
265	GO:0006955	immune response	13	3	0.74	1.00000
266	GO:0009719	response to endogenous stimulus	50	4	2.87	1.00000
267	GO:0090304	nucleic acid metabolic process	2819	72	161.54	1.00000
268	GO:0019438	aromatic compound biosynthetic process	1353	61	77.53	1.00000
269	GO:0042180	cellular ketone metabolic process	25	1	1.43	1.00000
270	GO:0098771	inorganic ion homeostasis	23	1	1.32	1.00000
271	GO:0019439	aromatic compound catabolic process	107	10	6.13	1.00000
272	GO:0033993	response to lipid	32	3	1.83	1.00000
273	GO:0019720	Mo-molybdopterin cofactor metabolic proc...	15	2	0.86	1.00000
274	GO:0072655	establishment of protein localization to...	14	1	0.8	1.00000
275	GO:0010605	negative regulation of macromolecule met...	76	2	4.36	1.00000
276	GO:0019725	cellular homeostasis	118	9	6.76	1.00000
277	GO:0140014	mitotic nuclear division	18	1	1.03	1.00000
278	GO:0010608	posttranscriptional regulation of gene e...	20	1	1.15	1.00000
279	GO:0098660	inorganic ion transmembrane transport	153	7	8.77	1.00000
280	GO:0046068	cGMP metabolic process	45	3	2.58	1.00000
281	GO:0098662	inorganic cation transmembrane transport	152	7	8.71	1.00000
282	GO:0006643	membrane lipid metabolic process	46	2	2.64	1.00000
283	GO:0070887	cellular response to chemical stimulus	58	7	3.32	1.00000
284	GO:0046390	ribose phosphate biosynthetic process	144	20	8.25	1.00000
285	GO:0044242	cellular lipid catabolic process	12	1	0.69	1.00000
286	GO:0051783	regulation of nuclear division	8	1	0.46	1.00000
287	GO:0031347	regulation of defense response	4	3	0.23	1.00000
288	GO:0046394	carboxylic acid biosynthetic process	130	5	7.45	1.00000
289	GO:0046395	carboxylic acid catabolic process	43	6	2.46	1.00000
290	GO:0031349	positive regulation of defense response	4	3	0.23	1.00000
291	GO:0044248	cellular catabolic process	399	31	22.86	1.00000
292	GO:1902652	secondary alcohol metabolic process	5	1	0.29	1.00000
293	GO:1902653	secondary alcohol biosynthetic process	1	1	0.06	1.00000
294	GO:0006974	cellular response to DNA damage stimulus	272	7	15.59	1.00000
295	GO:0046058	cAMP metabolic process	6	1	0.34	1.00000
296	GO:0098655	cation transmembrane transport	152	7	8.71	1.00000
297	GO:0098656	anion transmembrane transport	82	6	4.7	1.00000
298	GO:0045892	negative regulation of transcription, DN...	23	1	1.32	1.00000
299	GO:0019682	glyceraldehyde-3-phosphate metabolic pro...	15	2	0.86	1.00000
300	GO:0009968	negative regulation of signal transducti...	13	1	0.74	1.00000
301	GO:0017148	negative regulation of translation	8	1	0.46	1.00000
302	GO:0044237	cellular metabolic process	6452	252	369.73	1.00000
303	GO:0044238	primary metabolic process	7459	340	427.44	1.00000
304	GO:0000096	sulfur amino acid metabolic process	23	1	1.32	1.00000
305	GO:0046834	lipid phosphorylation	37	1	2.12	1.00000
306	GO:0000098	sulfur amino acid catabolic process	3	1	0.17	1.00000
307	GO:0032501	multicellular organismal process	156	6	8.94	1.00000
308	GO:0050801	ion homeostasis	23	1	1.32	1.00000
309	GO:0032502	developmental process	58	1	3.32	1.00000
310	GO:1990542	mitochondrial transmembrane transport	5	2	0.29	1.00000
311	GO:0006928	movement of cell or subcellular componen...	138	3	7.91	1.00000
312	GO:0046838	phosphorylated carbohydrate dephosphoryl...	11	1	0.63	1.00000
313	GO:0046839	phospholipid dephosphorylation	20	3	1.15	1.00000
314	GO:0098742	cell-cell adhesion via plasma-membrane a...	27	1	1.55	1.00000
315	GO:0002682	regulation of immune system process	4	3	0.23	1.00000
316	GO:0043043	peptide biosynthetic process	763	8	43.72	1.00000
317	GO:0002684	positive regulation of immune system pro...	4	3	0.23	1.00000
318	GO:0019674	NAD metabolic process	14	2	0.8	1.00000
319	GO:0051726	regulation of cell cycle	47	2	2.69	1.00000
320	GO:0006163	purine nucleotide metabolic process	260	31	14.9	1.00000
321	GO:0006164	purine nucleotide biosynthetic process	155	19	8.88	1.00000
322	GO:0045184	establishment of protein localization	405	7	23.21	1.00000
323	GO:0006165	nucleoside diphosphate phosphorylation	82	11	4.7	1.00000
324	GO:0015698	inorganic anion transport	72	2	4.13	1.00000
325	GO:0045934	negative regulation of nucleobase-contai...	24	1	1.38	1.00000
326	GO:0014070	response to organic cyclic compound	32	3	1.83	1.00000
327	GO:0009199	ribonucleoside triphosphate metabolic pr...	139	17	7.97	1.00000
328	GO:1902679	negative regulation of RNA biosynthetic ...	23	1	1.32	1.00000
329	GO:0042886	amide transport	420	8	24.07	1.00000
330	GO:0009987	cellular process	8565	338	490.82	1.00000
331	GO:0046364	monosaccharide biosynthetic process	20	3	1.15	1.00000
332	GO:0046365	monosaccharide catabolic process	6	3	0.34	1.00000
333	GO:0051716	cellular response to stimulus	1696	77	97.19	1.00000
334	GO:0065002	intracellular protein transmembrane tran...	4	1	0.23	1.00000
335	GO:0065003	macromolecular complex assembly	198	6	11.35	1.00000
336	GO:0065004	protein-DNA complex assembly	29	1	1.66	1.00000
337	GO:0043038	amino acid activation	219	3	12.55	1.00000
338	GO:0065007	biological regulation	2472	106	141.66	1.00000
339	GO:0030163	protein catabolic process	190	14	10.89	1.00000
340	GO:0065008	regulation of biological quality	195	9	11.17	1.00000
341	GO:0061024	membrane organization	38	1	2.18	1.00000
342	GO:0007088	regulation of mitotic nuclear division	8	1	0.46	1.00000
343	GO:0031589	cell-substrate adhesion	5	1	0.29	1.00000
344	GO:0032479	regulation of type I interferon producti...	4	3	0.23	1.00000
345	GO:0046292	formaldehyde metabolic process	3	2	0.17	1.00000
346	GO:0070848	response to growth factor	17	2	0.97	1.00000
347	GO:0006605	protein targeting	58	1	3.32	1.00000
348	GO:0031570	DNA integrity checkpoint	12	1	0.69	1.00000
349	GO:0009636	response to toxic substance	3	2	0.17	1.00000
350	GO:0005996	monosaccharide metabolic process	87	15	4.99	1.00000
351	GO:0070085	glycosylation	72	2	4.13	1.00000
352	GO:0006188	IMP biosynthetic process	11	3	0.63	1.00000
353	GO:1901475	pyruvate transmembrane transport	5	2	0.29	1.00000
354	GO:0010876	lipid localization	103	10	5.9	1.00000
355	GO:0051674	localization of cell	19	1	1.09	1.00000
356	GO:0070838	divalent metal ion transport	57	1	3.27	1.00000
357	GO:0198738	cell-cell signaling by wnt	32	4	1.83	1.00000
358	GO:0046040	IMP metabolic process	11	3	0.63	1.00000
359	GO:0000394	RNA splicing, via endonucleolytic cleava...	12	2	0.69	1.00000
360	GO:0009161	ribonucleoside monophosphate metabolic p...	144	21	8.25	1.00000
361	GO:0009163	nucleoside biosynthetic process	35	2	2.01	1.00000
362	GO:0046049	UMP metabolic process	2	1	0.11	1.00000
363	GO:0009167	purine ribonucleoside monophosphate meta...	137	19	7.85	1.00000
364	GO:0009168	purine ribonucleoside monophosphate bios...	55	8	3.15	1.00000
365	GO:0015992	proton transport	85	5	4.87	1.00000
366	GO:0007010	cytoskeleton organization	111	2	6.36	1.00000
367	GO:0009890	negative regulation of biosynthetic proc...	32	2	1.83	1.00000
368	GO:0006865	amino acid transport	82	4	4.7	1.00000
369	GO:0046031	ADP metabolic process	69	11	3.95	1.00000
370	GO:0009892	negative regulation of metabolic process	80	2	4.58	1.00000
371	GO:0032787	monocarboxylic acid metabolic process	125	17	7.16	1.00000
372	GO:0019637	organophosphate metabolic process	648	62	37.13	1.00000
373	GO:0009150	purine ribonucleotide metabolic process	238	31	13.64	1.00000
374	GO:0046034	ATP metabolic process	115	16	6.59	1.00000
375	GO:0009894	regulation of catabolic process	13	1	0.74	1.00000
376	GO:1903825	organic acid transmembrane transport	80	6	4.58	1.00000
377	GO:0015711	organic anion transport	133	9	7.62	1.00000
378	GO:0009152	purine ribonucleotide biosynthetic proce...	140	19	8.02	1.00000
379	GO:0046039	GTP metabolic process	22	1	1.26	1.00000
380	GO:0015718	monocarboxylic acid transport	34	4	1.95	1.00000
381	GO:0032774	RNA biosynthetic process	952	29	54.55	1.00000
382	GO:0000075	cell cycle checkpoint	17	1	0.97	1.00000
383	GO:0051641	cellular localization	450	8	25.79	1.00000
384	GO:0006091	generation of precursor metabolites and ...	144	13	8.25	1.00000
385	GO:0009185	ribonucleoside diphosphate metabolic pro...	69	11	3.95	1.00000
386	GO:0009187	cyclic nucleotide metabolic process	85	6	4.87	1.00000
387	GO:0015748	organophosphate ester transport	11	1	0.63	1.00000
388	GO:0071669	plant-type cell wall organization or bio...	8	2	0.46	1.00000
389	GO:0051703	intraspecies interaction between organis...	5	5	0.29	1.00000
390	GO:0051704	multi-organism process	20	5	1.15	1.00000
391	GO:0051705	multi-organism behavior	5	5	0.29	1.00000
392	GO:0051649	establishment of localization in cell	391	8	22.41	1.00000
393	GO:0007031	peroxisome organization	12	2	0.69	1.00000
394	GO:0015672	monovalent inorganic cation transport	243	10	13.93	1.00000
395	GO:0006144	purine nucleobase metabolic process	12	3	0.69	1.00000
396	GO:0006145	purine nucleobase catabolic process	3	2	0.17	1.00000
397	GO:0016125	sterol metabolic process	5	1	0.29	1.00000
398	GO:0060966	regulation of gene silencing by RNA	7	1	0.4	1.00000
399	GO:0016126	sterol biosynthetic process	1	1	0.06	1.00000
400	GO:0009173	pyrimidine ribonucleoside monophosphate ...	2	1	0.11	1.00000
401	GO:0009174	pyrimidine ribonucleoside monophosphate ...	2	1	0.11	1.00000
402	GO:0060968	regulation of gene silencing	7	1	0.4	1.00000
403	GO:0019941	modification-dependent protein catabolic...	153	8	8.77	1.00000
404	GO:0098916	anterograde trans-synaptic signaling	9	1	0.52	1.00000
405	GO:0097435	supramolecular fiber organization	58	1	3.32	1.00000
406	GO:0007265	Ras protein signal transduction	124	4	7.11	1.00000
407	GO:0009179	purine ribonucleoside diphosphate metabo...	69	11	3.95	1.00000
408	GO:0071715	icosanoid transport	24	2	1.38	1.00000
409	GO:0007266	Rho protein signal transduction	109	2	6.25	1.00000
410	GO:0007267	cell-cell signaling	42	5	2.41	1.00000
411	GO:0006873	cellular ion homeostasis	11	1	0.63	1.00000
412	GO:0005984	disaccharide metabolic process	21	1	1.2	1.00000
413	GO:0006875	cellular metal ion homeostasis	10	1	0.57	1.00000
414	GO:0008202	steroid metabolic process	5	1	0.29	1.00000
415	GO:0008203	cholesterol metabolic process	5	1	0.29	1.00000
416	GO:1902600	hydrogen ion transmembrane transport	75	5	4.3	1.00000
417	GO:0042364	water-soluble vitamin biosynthetic proce...	42	2	2.41	1.00000
418	GO:0009123	nucleoside monophosphate metabolic proce...	146	21	8.37	1.00000
419	GO:1901990	regulation of mitotic cell cycle phase t...	8	1	0.46	1.00000
420	GO:0009124	nucleoside monophosphate biosynthetic pr...	64	10	3.67	1.00000
421	GO:0009126	purine nucleoside monophosphate metaboli...	137	19	7.85	1.00000
422	GO:0009127	purine nucleoside monophosphate biosynth...	55	8	3.15	1.00000
423	GO:0006820	anion transport	216	11	12.38	1.00000
424	GO:0009129	pyrimidine nucleoside monophosphate meta...	4	1	0.23	1.00000
425	GO:0098609	cell-cell adhesion	27	1	1.55	1.00000
426	GO:0071407	cellular response to organic cyclic comp...	32	3	1.83	1.00000
427	GO:1901657	glycosyl compound metabolic process	95	10	5.44	1.00000
428	GO:0009110	vitamin biosynthetic process	42	2	2.41	1.00000
429	GO:1901659	glycosyl compound biosynthetic process	35	2	2.01	1.00000
430	GO:0009112	nucleobase metabolic process	21	5	1.2	1.00000
431	GO:0017038	protein import	18	1	1.03	1.00000
432	GO:0097659	nucleic acid-templated transcription	943	28	54.04	1.00000
433	GO:0033865	nucleoside bisphosphate metabolic proces...	27	7	1.55	1.00000
434	GO:0033866	nucleoside bisphosphate biosynthetic pro...	19	7	1.09	1.00000
435	GO:0006063	uronic acid metabolic process	2	1	0.11	1.00000
436	GO:0009117	nucleotide metabolic process	408	45	23.38	1.00000
437	GO:0015980	energy derivation by oxidation of organi...	72	2	4.13	1.00000
438	GO:0009119	ribonucleoside metabolic process	46	3	2.64	1.00000
439	GO:0006066	alcohol metabolic process	51	5	2.92	1.00000
440	GO:0045087	innate immune response	6	3	0.34	1.00000
441	GO:0045088	regulation of innate immune response	4	3	0.23	1.00000
442	GO:0015985	energy coupled proton transport, down el...	32	5	1.83	1.00000
443	GO:0000375	RNA splicing, via transesterification re...	77	2	4.41	1.00000
444	GO:0045089	positive regulation of innate immune res...	4	3	0.23	1.00000
445	GO:0007346	regulation of mitotic cell cycle	11	1	0.63	1.00000
446	GO:0006816	calcium ion transport	45	1	2.58	1.00000
447	GO:0000377	RNA splicing, via transesterification re...	77	2	4.41	1.00000
448	GO:0015988	energy coupled proton transmembrane tran...	45	1	2.58	1.00000
449	GO:0006818	hydrogen transport	85	5	4.87	1.00000
450	GO:0007005	mitochondrion organization	44	2	2.52	1.00000
451	GO:0009141	nucleoside triphosphate metabolic proces...	149	18	8.54	1.00000
452	GO:0051156	glucose 6-phosphate metabolic process	14	2	0.8	1.00000
453	GO:0007006	mitochondrial membrane organization	10	1	0.57	1.00000
454	GO:0009142	nucleoside triphosphate biosynthetic pro...	49	5	2.81	1.00000
455	GO:0007007	inner mitochondrial membrane organizatio...	10	1	0.57	1.00000
456	GO:0009144	purine nucleoside triphosphate metabolic...	137	17	7.85	1.00000
457	GO:0009889	regulation of biosynthetic process	773	26	44.3	1.00000
458	GO:0009145	purine nucleoside triphosphate biosynthe...	47	5	2.69	1.00000
459	GO:0051604	protein maturation	26	1	1.49	1.00000
460	GO:0006399	tRNA metabolic process	363	7	20.8	1.00000
461	GO:0044782	cilium organization	13	1	0.74	1.00000
462	GO:0046218	indolalkylamine catabolic process	7	1	0.4	1.00000
463	GO:0006101	citrate metabolic process	19	2	1.09	1.00000
464	GO:0090662	ATP hydrolysis coupled transmembrane tra...	45	1	2.58	1.00000
465	GO:0009130	pyrimidine nucleoside monophosphate bios...	4	1	0.23	1.00000
466	GO:0006848	pyruvate transport	5	2	0.29	1.00000
467	GO:0051186	cofactor metabolic process	251	27	14.38	1.00000
468	GO:0019856	pyrimidine nucleobase biosynthetic proce...	8	2	0.46	1.00000
469	GO:2000112	regulation of cellular macromolecule bio...	773	26	44.3	1.00000
470	GO:0009132	nucleoside diphosphate metabolic process	86	11	4.93	1.00000
471	GO:2000113	negative regulation of cellular macromol...	32	2	1.83	1.00000
472	GO:0034030	ribonucleoside bisphosphate biosynthetic...	19	7	1.09	1.00000
473	GO:0051188	cofactor biosynthetic process	148	14	8.48	1.00000
474	GO:0070271	protein complex biogenesis	135	4	7.74	1.00000
475	GO:0006081	cellular aldehyde metabolic process	29	4	1.66	1.00000
476	GO:0051189	prosthetic group metabolic process	19	2	1.09	1.00000
477	GO:0055065	metal ion homeostasis	12	1	0.69	1.00000
478	GO:0009135	purine nucleoside diphosphate metabolic ...	69	11	3.95	1.00000
479	GO:0006082	organic acid metabolic process	615	45	35.24	1.00000
480	GO:0034032	purine nucleoside bisphosphate metabolic...	27	7	1.55	1.00000
481	GO:0034033	purine nucleoside bisphosphate biosynthe...	19	7	1.09	1.00000
482	GO:0044770	cell cycle phase transition	9	1	0.52	1.00000
483	GO:0044772	mitotic cell cycle phase transition	8	1	0.46	1.00000
484	GO:0051171	regulation of nitrogen compound metaboli...	795	27	45.56	1.00000
485	GO:0051172	negative regulation of nitrogen compound...	32	2	1.83	1.00000
486	GO:0099536	synaptic signaling	9	1	0.52	1.00000
487	GO:0010033	response to organic substance	64	5	3.67	1.00000
488	GO:0099537	trans-synaptic signaling	9	1	0.52	1.00000
489	GO:1903047	mitotic cell cycle process	23	1	1.32	1.00000
490	GO:0043545	molybdopterin cofactor metabolic process	19	2	1.09	1.00000
491	GO:0006839	mitochondrial transport	20	3	1.15	1.00000
492	GO:0032196	transposition	199	6	11.4	1.00000
493	GO:0000280	nuclear division	26	1	1.49	1.00000
494	GO:0051179	localization	2649	121	151.8	1.00000
495	GO:0016051	carbohydrate biosynthetic process	91	5	5.21	1.00000
496	GO:0033875	ribonucleoside bisphosphate metabolic pr...	27	7	1.55	1.00000
497	GO:0042592	homeostatic process	160	9	9.17	1.00000
498	GO:0016052	carbohydrate catabolic process	76	15	4.36	1.00000
499	GO:0006072	glycerol-3-phosphate metabolic process	29	1	1.66	1.00000
500	GO:0071702	organic substance transport	680	27	38.97	1.00000
501	GO:0016053	organic acid biosynthetic process	130	5	7.45	1.00000
502	GO:0042593	glucose homeostasis	7	1	0.4	1.00000
503	GO:0071704	organic substance metabolic process	7832	352	448.82	1.00000
504	GO:0016054	organic acid catabolic process	43	6	2.46	1.00000
505	GO:0009060	aerobic respiration	27	2	1.55	1.00000
506	GO:0046578	regulation of Ras protein signal transdu...	123	4	7.05	1.00000
507	GO:0071705	nitrogen compound transport	530	14	30.37	1.00000
508	GO:0009063	cellular amino acid catabolic process	37	5	2.12	1.00000
509	GO:0045017	glycerolipid biosynthetic process	36	2	2.06	1.00000
510	GO:0009064	glutamine family amino acid metabolic pr...	56	3	3.21	1.00000
511	GO:1901615	organic hydroxy compound metabolic proce...	60	5	3.44	1.00000
512	GO:1901616	organic hydroxy compound catabolic proce...	13	2	0.74	1.00000
513	GO:0009066	aspartate family amino acid metabolic pr...	31	1	1.78	1.00000
514	GO:1901617	organic hydroxy compound biosynthetic pr...	25	3	1.43	1.00000
515	GO:0055080	cation homeostasis	22	1	1.26	1.00000
516	GO:0009068	aspartate family amino acid catabolic pr...	3	1	0.17	1.00000
517	GO:1990748	cellular detoxification	3	2	0.17	1.00000
518	GO:0009069	serine family amino acid metabolic proce...	29	1	1.66	1.00000
519	GO:0055082	cellular chemical homeostasis	18	2	1.03	1.00000
520	GO:0051128	regulation of cellular component organiz...	50	1	2.87	1.00000
521	GO:0006020	inositol metabolic process	17	3	0.97	1.00000
522	GO:0055086	nucleobase-containing small molecule met...	474	54	27.16	1.00000
523	GO:0006366	transcription from RNA polymerase II pro...	95	1	5.44	1.00000
524	GO:0006022	aminoglycan metabolic process	109	7	6.25	1.00000
525	GO:0090407	organophosphate biosynthetic process	349	34	20	1.00000
526	GO:1901987	regulation of cell cycle phase transitio...	9	1	0.52	1.00000
527	GO:0009057	macromolecule catabolic process	275	14	15.76	1.00000
528	GO:0009100	glycoprotein metabolic process	73	2	4.18	1.00000
529	GO:0009059	macromolecule biosynthetic process	2072	42	118.74	1.00000
530	GO:0009101	glycoprotein biosynthetic process	70	2	4.01	1.00000
531	GO:0055072	iron ion homeostasis	6	1	0.34	1.00000
532	GO:0006352	DNA-templated transcription, initiation	62	1	3.55	1.00000
533	GO:0016071	mRNA metabolic process	193	5	11.06	1.00000
534	GO:0070585	protein localization to mitochondrion	14	1	0.8	1.00000
535	GO:0055076	transition metal ion homeostasis	9	1	0.52	1.00000
536	GO:0009108	coenzyme biosynthetic process	90	11	5.16	1.00000
537	GO:0006359	regulation of transcription from RNA pol...	1	1	0.06	1.00000
538	GO:0015931	nucleobase-containing compound transport	23	2	1.32	1.00000
539	GO:0000226	microtubule cytoskeleton organization	57	2	3.27	1.00000
540	GO:0044743	protein transmembrane import into intrac...	4	1	0.23	1.00000
541	GO:0009084	glutamine family amino acid biosynthetic...	38	3	2.18	1.00000
542	GO:0046496	nicotinamide nucleotide metabolic proces...	101	15	5.79	1.00000
543	GO:0015936	coenzyme A metabolic process	26	7	1.49	1.00000
544	GO:1905114	cell surface receptor signaling pathway ...	32	4	1.83	1.00000
545	GO:0042278	purine nucleoside metabolic process	41	2	2.35	1.00000
546	GO:0006040	amino sugar metabolic process	74	6	4.24	1.00000
547	GO:0035194	posttranscriptional gene silencing by RN...	7	1	0.4	1.00000
548	GO:0035195	gene silencing by miRNA	7	1	0.4	1.00000
549	GO:0009070	serine family amino acid biosynthetic pr...	19	1	1.09	1.00000
550	GO:0042221	response to chemical	87	7	4.99	1.00000
551	GO:0050794	regulation of cellular process	2335	100	133.81	1.00000
552	GO:0009074	aromatic amino acid family catabolic pro...	9	3	0.52	1.00000
553	GO:0034220	ion transmembrane transport	234	13	13.41	1.00000
554	GO:0032940	secretion by cell	59	1	3.38	1.00000
555	GO:0010564	regulation of cell cycle process	19	1	1.09	1.00000
556	GO:0003008	system process	93	2	5.33	1.00000
557	GO:0097164	ammonium ion metabolic process	10	1	0.57	1.00000
558	GO:0000245	spliceosomal complex assembly	20	1	1.15	1.00000
559	GO:0032606	type I interferon production	4	3	0.23	1.00000
560	GO:0006261	DNA-dependent DNA replication	68	1	3.9	1.00000
561	GO:0042219	cellular modified amino acid catabolic p...	21	2	1.2	1.00000
562	GO:0010556	regulation of macromolecule biosynthetic...	773	26	44.3	1.00000
563	GO:0016043	cellular component organization	607	14	34.78	1.00000
564	GO:0030030	cell projection organization	18	1	1.03	1.00000
565	GO:0010558	negative regulation of macromolecule bio...	32	2	1.83	1.00000
566	GO:0030031	cell projection assembly	5	1	0.29	1.00000
567	GO:1901605	alpha-amino acid metabolic process	145	8	8.31	1.00000
568	GO:0033365	protein localization to organelle	67	1	3.84	1.00000
569	GO:1901606	alpha-amino acid catabolic process	30	4	1.72	1.00000
570	GO:0046467	membrane lipid biosynthetic process	34	2	1.95	1.00000
571	GO:0060147	regulation of posttranscriptional gene s...	7	1	0.4	1.00000
572	GO:1901607	alpha-amino acid biosynthetic process	94	4	5.39	1.00000
573	GO:0006310	DNA recombination	308	6	17.65	1.00000
574	GO:0015908	fatty acid transport	24	2	1.38	1.00000
575	GO:0015909	long-chain fatty acid transport	24	2	1.38	1.00000
576	GO:0045333	cellular respiration	39	2	2.23	1.00000
577	GO:0034248	regulation of cellular amide metabolic p...	20	1	1.15	1.00000
578	GO:0072350	tricarboxylic acid metabolic process	20	2	1.15	1.00000
579	GO:0034249	negative regulation of cellular amide me...	8	1	0.46	1.00000
580	GO:0019362	pyridine nucleotide metabolic process	101	15	5.79	1.00000
581	GO:0019363	pyridine nucleotide biosynthetic process	16	2	0.92	1.00000
582	GO:0008652	cellular amino acid biosynthetic process	103	4	5.9	1.00000
583	GO:0030329	prenylcysteine metabolic process	3	1	0.17	1.00000
584	GO:0033013	tetrapyrrole metabolic process	74	4	4.24	1.00000
585	GO:0033014	tetrapyrrole biosynthetic process	71	4	4.07	1.00000
586	GO:0045229	external encapsulating structure organiz...	21	2	1.2	1.00000
587	GO:0043412	macromolecule modification	1603	47	91.86	1.00000
588	GO:0043413	macromolecule glycosylation	70	2	4.01	1.00000
589	GO:0043414	macromolecule methylation	71	2	4.07	1.00000
590	GO:0030258	lipid modification	63	4	3.61	1.00000
591	GO:0048856	anatomical structure development	58	1	3.32	1.00000
592	GO:0046483	heterocycle metabolic process	3536	138	202.63	1.00000
593	GO:0019359	nicotinamide nucleotide biosynthetic pro...	16	2	0.92	1.00000
594	GO:0046486	glycerolipid metabolic process	109	7	6.25	1.00000
595	GO:0033043	regulation of organelle organization	41	1	2.35	1.00000
596	GO:0046488	phosphatidylinositol metabolic process	103	6	5.9	1.00000
597	GO:0009260	ribonucleotide biosynthetic process	144	20	8.25	1.00000
598	GO:0016310	phosphorylation	1029	42	58.97	1.00000
599	GO:0016311	dephosphorylation	164	4	9.4	1.00000
600	GO:0009262	deoxyribonucleotide metabolic process	24	2	1.38	1.00000
601	GO:0006560	proline metabolic process	11	3	0.63	1.00000
602	GO:0030003	cellular cation homeostasis	10	1	0.57	1.00000
603	GO:0046474	glycerophospholipid biosynthetic process	36	2	2.06	1.00000
604	GO:0019388	galactose catabolic process	3	2	0.17	1.00000
605	GO:0006220	pyrimidine nucleotide metabolic process	38	2	2.18	1.00000
606	GO:0006566	threonine metabolic process	4	1	0.23	1.00000
607	GO:0006222	UMP biosynthetic process	2	1	0.11	1.00000
608	GO:0006568	tryptophan metabolic process	11	1	0.63	1.00000
609	GO:0050789	regulation of biological process	2389	104	136.9	1.00000
610	GO:0006569	tryptophan catabolic process	7	1	0.4	1.00000
611	GO:0033036	macromolecule localization	527	19	30.2	1.00000
612	GO:0080120	CAAX-box protein maturation	2	1	0.11	1.00000
613	GO:0009310	amine catabolic process	7	1	0.4	1.00000
614	GO:0009311	oligosaccharide metabolic process	23	1	1.32	1.00000
615	GO:0032870	cellular response to hormone stimulus	35	3	2.01	1.00000
616	GO:0009259	ribonucleotide metabolic process	242	32	13.87	1.00000
617	GO:0043436	oxoacid metabolic process	613	45	35.13	1.00000
618	GO:0048878	chemical homeostasis	32	2	1.83	1.00000
619	GO:0072329	monocarboxylic acid catabolic process	10	1	0.57	1.00000
620	GO:0050776	regulation of immune response	4	3	0.23	1.00000
621	GO:0072593	reactive oxygen species metabolic proces...	26	1	1.49	1.00000
622	GO:0006213	pyrimidine nucleoside metabolic process	20	1	1.15	1.00000
623	GO:0015840	urea transport	9	1	0.52	1.00000
624	GO:0072594	establishment of protein localization to...	66	1	3.78	1.00000
625	GO:0006558	L-phenylalanine metabolic process	2	2	0.11	1.00000
626	GO:0050778	positive regulation of immune response	4	3	0.23	1.00000
627	GO:0019320	hexose catabolic process	4	2	0.23	1.00000
628	GO:0071822	protein complex subunit organization	162	4	9.28	1.00000
629	GO:0071824	protein-DNA complex subunit organization	29	1	1.66	1.00000
630	GO:0015849	organic acid transport	120	8	6.88	1.00000
631	GO:0002376	immune system process	13	3	0.74	1.00000
632	GO:0071826	ribonucleoprotein complex subunit organi...	46	1	2.64	1.00000
633	GO:0042537	benzene-containing compound metabolic pr...	7	1	0.4	1.00000
634	GO:0080090	regulation of primary metabolic process	795	27	45.56	1.00000
635	GO:0006586	indolalkylamine metabolic process	11	1	0.63	1.00000
636	GO:0015833	peptide transport	410	7	23.5	1.00000
637	GO:1901135	carbohydrate derivative metabolic proces...	622	56	35.64	1.00000
638	GO:1901136	carbohydrate derivative catabolic proces...	56	3	3.21	1.00000
639	GO:1901137	carbohydrate derivative biosynthetic pro...	294	25	16.85	1.00000
640	GO:0046785	microtubule polymerization	34	1	1.95	1.00000
641	GO:0008643	carbohydrate transport	46	1	2.64	1.00000
642	GO:0050657	nucleic acid transport	17	2	0.97	1.00000
643	GO:0050658	RNA transport	17	2	0.97	1.00000
644	GO:0019318	hexose metabolic process	83	14	4.76	1.00000
645	GO:0072348	sulfur compound transport	55	1	3.15	1.00000
646	GO:0019319	hexose biosynthetic process	20	3	1.15	1.00000
647	GO:0006575	cellular modified amino acid metabolic p...	56	2	3.21	1.00000
648	GO:0016556	mRNA modification	8	1	0.46	1.00000
649	GO:0006576	cellular biogenic amine metabolic proces...	30	1	1.72	1.00000
650	GO:0009220	pyrimidine ribonucleotide biosynthetic p...	18	1	1.03	1.00000
651	GO:0031929	TOR signaling	15	1	0.86	1.00000
652	GO:0071396	cellular response to lipid	32	3	1.83	1.00000
653	GO:0002253	activation of immune response	4	3	0.23	1.00000
654	GO:0071840	cellular component organization or bioge...	698	15	40	1.00000
655	GO:0072330	monocarboxylic acid biosynthetic process	30	1	1.72	1.00000
656	GO:0031163	metallo-sulfur cluster assembly	18	1	1.03	1.00000
657	GO:0080134	regulation of response to stress	7	3	0.4	1.00000
658	GO:0036260	RNA capping	16	1	0.92	1.00000
659	GO:0046434	organophosphate catabolic process	66	8	3.78	1.00000
660	GO:0042451	purine nucleoside biosynthetic process	31	1	1.78	1.00000
661	GO:0010467	gene expression	2239	51	128.31	1.00000
662	GO:1901068	guanosine-containing compound metabolic ...	33	1	1.89	1.00000
663	GO:0010468	regulation of gene expression	813	26	46.59	1.00000
664	GO:0042455	ribonucleoside biosynthetic process	35	2	2.01	1.00000
665	GO:0009218	pyrimidine ribonucleotide metabolic proc...	18	1	1.03	1.00000
666	GO:0001816	cytokine production	4	3	0.23	1.00000
667	GO:0001817	regulation of cytokine production	4	3	0.23	1.00000
668	GO:1905039	carboxylic acid transmembrane transport	80	6	4.58	1.00000
669	GO:0001819	positive regulation of cytokine producti...	4	3	0.23	1.00000
670	GO:0051252	regulation of RNA metabolic process	749	25	42.92	1.00000
671	GO:0051253	negative regulation of RNA metabolic pro...	23	1	1.32	1.00000
672	GO:0043623	cellular protein complex assembly	98	4	5.62	1.00000
673	GO:0006518	peptide metabolic process	789	9	45.21	1.00000
674	GO:0010458	exit from mitosis	2	1	0.11	1.00000
675	GO:0019222	regulation of metabolic process	853	27	48.88	1.00000
676	GO:0033554	cellular response to stress	275	7	15.76	1.00000
677	GO:0051258	protein polymerization	52	1	2.98	1.00000
678	GO:0009247	glycolipid biosynthetic process	32	2	1.83	1.00000
679	GO:0006497	protein lipidation	32	2	1.83	1.00000
680	GO:1902221	erythrose 4-phosphate/phosphoenolpyruvat...	2	2	0.11	1.00000
681	GO:1902222	erythrose 4-phosphate/phosphoenolpyruvat...	2	2	0.11	1.00000
682	GO:0046717	acid secretion	24	2	1.38	1.00000
683	GO:0006544	glycine metabolic process	20	1	1.15	1.00000
684	GO:0009308	amine metabolic process	35	1	2.01	1.00000
685	GO:0071363	cellular response to growth factor stimu...	17	2	0.97	1.00000
686	GO:0008150	biological_process	14763	846	846	1.00000
687	GO:0034470	ncRNA processing	196	4	11.23	1.00000
688	GO:1903506	regulation of nucleic acid-templated tra...	747	25	42.81	1.00000
689	GO:0006206	pyrimidine nucleobase metabolic process	9	2	0.52	1.00000
690	GO:1903507	negative regulation of nucleic acid-temp...	23	1	1.32	1.00000
691	GO:0009235	cobalamin metabolic process	22	2	1.26	1.00000
692	GO:1903509	liposaccharide metabolic process	32	2	1.83	1.00000
693	GO:0019219	regulation of nucleobase-containing comp...	755	25	43.27	1.00000
694	GO:1901071	glucosamine-containing compound metaboli...	74	6	4.24	1.00000
695	GO:0019585	glucuronate metabolic process	2	1	0.11	1.00000
696	GO:0022402	cell cycle process	47	1	2.69	1.00000
697	GO:0051276	chromosome organization	176	1	10.09	1.00000
698	GO:0043647	inositol phosphate metabolic process	12	1	0.69	1.00000
699	GO:1901360	organic cyclic compound metabolic proces...	3565	148	204.29	1.00000
700	GO:0043648	dicarboxylic acid metabolic process	27	2	1.55	1.00000
701	GO:0032011	ARF protein signal transduction	15	2	0.86	1.00000
702	GO:1901361	organic cyclic compound catabolic proces...	114	10	6.53	1.00000
703	GO:1901362	organic cyclic compound biosynthetic pro...	1395	67	79.94	1.00000
704	GO:0071804	cellular potassium ion transport	35	1	2.01	1.00000
705	GO:0071806	protein transmembrane transport	5	1	0.29	1.00000
706	GO:0035082	axoneme assembly	1	1	0.06	1.00000
707	GO:0070727	cellular macromolecule localization	346	5	19.83	1.00000
708	GO:0060255	regulation of macromolecule metabolic pr...	839	27	48.08	1.00000
709	GO:0072521	purine-containing compound metabolic pro...	278	34	15.93	1.00000
710	GO:0072522	purine-containing compound biosynthetic ...	167	20	9.57	1.00000
711	GO:0043632	modification-dependent macromolecule cat...	153	8	8.77	1.00000
712	GO:0072523	purine-containing compound catabolic pro...	4	2	0.23	1.00000
713	GO:0071383	cellular response to steroid hormone sti...	32	3	1.83	1.00000
714	GO:0072524	pyridine-containing compound metabolic p...	110	15	6.3	1.00000
715	GO:0072525	pyridine-containing compound biosyntheti...	25	2	1.43	1.00000
716	GO:0006461	protein complex assembly	135	4	7.74	1.00000
717	GO:1901292	nucleoside phosphate catabolic process	35	5	2.01	1.00000
718	GO:1901293	nucleoside phosphate biosynthetic proces...	249	27	14.27	1.00000
719	GO:0072527	pyrimidine-containing compound metabolic...	52	2	2.98	1.00000
720	GO:0072528	pyrimidine-containing compound biosynthe...	42	2	2.41	1.00000
721	GO:0036211	protein modification process	1466	43	84.01	1.00000
722	GO:0042440	pigment metabolic process	39	3	2.23	1.00000
723	GO:0006790	sulfur compound metabolic process	112	3	6.42	1.00000
724	GO:0097354	prenylation	28	1	1.6	1.00000
725	GO:0072511	divalent inorganic cation transport	60	1	3.44	1.00000
726	GO:0006793	phosphorus metabolic process	1685	92	96.56	1.00000
727	GO:0009201	ribonucleoside triphosphate biosynthetic...	49	5	2.81	1.00000
728	GO:0009205	purine ribonucleoside triphosphate metab...	137	17	7.85	1.00000
729	GO:0009206	purine ribonucleoside triphosphate biosy...	47	5	2.69	1.00000
730	GO:0022610	biological adhesion	107	6	6.13	1.00000
731	GO:0060271	cilium assembly	5	1	0.29	1.00000
732	GO:0022613	ribonucleoprotein complex biogenesis	120	2	6.88	1.00000
733	GO:0042430	indole-containing compound metabolic pro...	11	1	0.63	1.00000
734	GO:0051240	positive regulation of multicellular org...	5	3	0.29	1.00000
735	GO:0006505	GPI anchor metabolic process	32	2	1.83	1.00000
736	GO:0022618	ribonucleoprotein complex assembly	34	1	1.95	1.00000
737	GO:0042436	indole-containing compound catabolic pro...	7	1	0.4	1.00000
738	GO:0051246	regulation of protein metabolic process	48	2	2.75	1.00000
739	GO:0044106	cellular amine metabolic process	34	1	1.95	1.00000
740	GO:0051248	negative regulation of protein metabolic...	8	1	0.46	1.00000
741	GO:0032268	regulation of cellular protein metabolic...	45	1	2.58	1.00000
742	GO:0046700	heterocycle catabolic process	112	8	6.42	1.00000
743	GO:0032269	negative regulation of cellular protein ...	8	1	0.46	1.00000
744	GO:0034660	ncRNA metabolic process	417	7	23.9	1.00000
745	GO:0044085	cellular component biogenesis	321	8	18.4	1.00000
746	GO:0071310	cellular response to organic substance	55	5	3.15	1.00000
747	GO:0050896	response to stimulus	1832	82	104.98	1.00000
748	GO:0043603	cellular amide metabolic process	819	9	46.93	1.00000
749	GO:0007610	behavior	5	5	0.29	1.00000
750	GO:0051234	establishment of localization	2616	120	149.91	1.00000
751	GO:0043604	amide biosynthetic process	779	8	44.64	1.00000
752	GO:0051236	establishment of RNA localization	17	2	0.97	1.00000
753	GO:0051239	regulation of multicellular organismal p...	7	3	0.4	1.00000
754	GO:0016458	gene silencing	8	1	0.46	1.00000
755	GO:0043933	macromolecular complex subunit organizat...	237	6	13.58	1.00000
756	GO:0034654	nucleobase-containing compound biosynthe...	1242	57	71.17	1.00000
757	GO:0048285	organelle fission	32	3	1.83	1.00000
758	GO:0034655	nucleobase-containing compound catabolic...	93	5	5.33	1.00000
759	GO:0006766	vitamin metabolic process	45	2	2.58	1.00000
760	GO:0045786	negative regulation of cell cycle	26	1	1.49	1.00000
761	GO:0006767	water-soluble vitamin metabolic process	45	2	2.58	1.00000
762	GO:0043170	macromolecule metabolic process	5825	182	333.8	1.00000
763	GO:0019538	protein metabolic process	3136	108	179.71	1.00000
764	GO:0016485	protein processing	14	1	0.8	1.00000
765	GO:0009451	RNA modification	133	4	7.62	1.00000
766	GO:1902531	regulation of intracellular signal trans...	154	6	8.83	1.00000
767	GO:0043171	peptide catabolic process	18	1	1.03	1.00000
768	GO:0009452	7-methylguanosine RNA capping	16	1	0.92	1.00000
769	GO:1902532	negative regulation of intracellular sig...	10	1	0.57	1.00000
770	GO:0043174	nucleoside salvage	7	1	0.4	1.00000
771	GO:0032006	regulation of TOR signaling	15	1	0.86	1.00000
772	GO:0006694	steroid biosynthetic process	1	1	0.06	1.00000
773	GO:0046164	alcohol catabolic process	13	2	0.74	1.00000
774	GO:0046165	alcohol biosynthetic process	16	3	0.92	1.00000
775	GO:0042402	cellular biogenic amine catabolic proces...	7	1	0.4	1.00000
776	GO:0006753	nucleoside phosphate metabolic process	413	46	23.67	1.00000
777	GO:0006754	ATP biosynthetic process	33	5	1.89	1.00000
778	GO:0023051	regulation of signaling	190	8	10.89	1.00000
779	GO:0023052	signaling	1433	69	82.12	1.00000
780	GO:0046916	cellular transition metal ion homeostasi...	7	1	0.4	1.00000
781	GO:0006757	ATP generation from ADP	68	11	3.9	1.00000
782	GO:0071560	cellular response to transforming growth...	11	1	0.63	1.00000
783	GO:2001141	regulation of RNA biosynthetic process	747	25	42.81	1.00000
784	GO:0070646	protein modification by small protein re...	106	5	6.07	1.00000
785	GO:0070647	protein modification by small protein co...	151	5	8.65	1.00000
786	GO:0023057	negative regulation of signaling	13	1	0.74	1.00000
787	GO:0006417	regulation of translation	20	1	1.15	1.00000
788	GO:0031109	microtubule polymerization or depolymeri...	35	1	2.01	1.00000
789	GO:0046942	carboxylic acid transport	120	8	6.88	1.00000
790	GO:0033500	carbohydrate homeostasis	7	1	0.4	1.00000
791	GO:0018130	heterocycle biosynthetic process	1388	66	79.54	1.00000
792	GO:0071554	cell wall organization or biogenesis	32	2	1.83	1.00000
793	GO:0071555	cell wall organization	21	2	1.2	1.00000
794	GO:0034622	cellular macromolecular complex assembly	161	6	9.23	1.00000
795	GO:0071559	response to transforming growth factor b...	11	1	0.63	1.00000
796	GO:0046185	aldehyde catabolic process	3	2	0.17	1.00000
797	GO:0022607	cellular component assembly	230	7	13.18	1.00000
798	GO:0007167	enzyme linked receptor protein signaling...	38	2	2.18	1.00000
799	GO:1901564	organonitrogen compound metabolic proces...	4026	188	230.71	1.00000
800	GO:0043094	cellular metabolic compound salvage	16	1	0.92	1.00000
801	GO:0007169	transmembrane receptor protein tyrosine ...	25	1	1.43	1.00000
802	GO:1901565	organonitrogen compound catabolic proces...	292	22	16.73	1.00000
803	GO:0099131	ATP hydrolysis coupled ion transmembrane...	45	1	2.58	1.00000
804	GO:0070925	organelle assembly	14	1	0.8	1.00000
805	GO:0052652	cyclic purine nucleotide metabolic proce...	51	4	2.92	1.00000
806	GO:1901566	organonitrogen compound biosynthetic pro...	1325	46	75.93	1.00000
807	GO:0099132	ATP hydrolysis coupled cation transmembr...	45	1	2.58	1.00000
808	GO:0008104	protein localization	412	7	23.61	1.00000
809	GO:0006778	porphyrin-containing compound metabolic ...	36	2	2.06	1.00000
810	GO:0046939	nucleotide phosphorylation	82	11	4.7	1.00000
811	GO:0006779	porphyrin-containing compound biosynthet...	34	2	1.95	1.00000
812	GO:0048583	regulation of response to stimulus	196	11	11.23	1.00000
813	GO:0048584	positive regulation of response to stimu...	12	3	0.69	1.00000
814	GO:0048585	negative regulation of response to stimu...	13	1	0.74	1.00000
815	GO:0010629	negative regulation of gene expression	75	2	4.3	1.00000
816	GO:0006661	phosphatidylinositol biosynthetic proces...	32	2	1.83	1.00000
817	GO:1903963	arachidonate transport	24	2	1.38	1.00000
818	GO:0046173	polyol biosynthetic process	15	2	0.86	1.00000
819	GO:0034613	cellular protein localization	346	5	19.83	1.00000
820	GO:0007154	cell communication	1433	69	82.12	1.00000
821	GO:0006664	glycolipid metabolic process	32	2	1.83	1.00000
822	GO:0006720	isoprenoid metabolic process	41	3	2.35	1.00000
823	GO:0046174	polyol catabolic process	13	2	0.74	1.00000
824	GO:0044260	cellular macromolecule metabolic process	4914	132	281.6	1.00000
825	GO:0044262	cellular carbohydrate metabolic process	123	7	7.05	1.00000
826	GO:0007600	sensory perception	92	2	5.27	1.00000
827	GO:0006725	cellular aromatic compound metabolic pro...	3525	143	202	1.00000
828	GO:0016441	posttranscriptional gene silencing	7	1	0.4	1.00000
829	GO:0044265	cellular macromolecule catabolic process	238	13	13.64	1.00000
830	GO:0044267	cellular protein metabolic process	2312	62	132.49	1.00000
831	GO:0009755	hormone-mediated signaling pathway	32	3	1.83	1.00000
832	GO:0038179	neurotrophin signaling pathway	5	1	0.29	1.00000
833	GO:0007606	sensory perception of chemical stimulus	84	2	4.81	1.00000
834	GO:0006650	glycerophospholipid metabolic process	109	7	6.25	1.00000
835	GO:0034641	cellular nitrogen compound metabolic pro...	4129	141	236.61	1.00000
836	GO:0032309	icosanoid secretion	24	2	1.38	1.00000
837	GO:0006996	organelle organization	388	8	22.23	1.00000
838	GO:0034645	cellular macromolecule biosynthetic proc...	2063	42	118.22	1.00000
839	GO:0050877	nervous system process	92	2	5.27	1.00000
840	GO:0000002	mitochondrial genome maintenance	2	0	0.11	1.00000
841	GO:0000003	reproduction	18	0	1.03	1.00000
842	GO:0000012	single strand break repair	3	0	0.17	1.00000
843	GO:0000027	ribosomal large subunit assembly	1	0	0.06	1.00000
844	GO:0000041	transition metal ion transport	7	0	0.4	1.00000
845	GO:0000042	protein targeting to Golgi	12	0	0.69	1.00000
846	GO:0000070	mitotic sister chromatid segregation	16	0	0.92	1.00000

## Sheet: d)
	GO.ID	Term	Annotated	Significant	Expected	Fisher
1	GO:0006508	proteolysis	1020	87	58.31	3.7e-06
2	GO:0006614	SRP-dependent cotranslational protein ta...	25	8	1.43	5.0e-05
3	GO:0016192	vesicle-mediated transport	296	34	16.92	0.00039
4	GO:0006888	ER to Golgi vesicle-mediated transport	28	7	1.6	0.00080
5	GO:0009253	peptidoglycan catabolic process	29	7	1.66	0.00100
6	GO:0006546	glycine catabolic process	10	4	0.57	0.00169
7	GO:0006435	threonyl-tRNA aminoacylation	5	3	0.29	0.00171
8	GO:0006979	response to oxidative stress	52	9	2.97	0.00250
9	GO:0006891	intra-Golgi vesicle-mediated transport	23	5	1.31	0.00253
10	GO:0006367	transcription initiation from RNA polyme...	18	5	1.03	0.00277
11	GO:0006886	intracellular protein transport	331	36	18.92	0.00357
12	GO:0006952	defense response	13	4	0.74	0.00547
13	GO:0055085	transmembrane transport	1139	80	65.12	0.00628
14	GO:0032968	positive regulation of transcription elo...	3	2	0.17	0.00942
15	GO:0015031	protein transport	397	45	22.7	0.01089
16	GO:0006529	asparagine biosynthetic process	9	3	0.51	0.01206
17	GO:0015936	coenzyme A metabolic process	26	5	1.49	0.01456
18	GO:0006368	transcription elongation from RNA polyme...	13	5	0.74	0.01641
19	GO:0006420	arginyl-tRNA aminoacylation	10	3	0.57	0.01651
20	GO:0006433	prolyl-tRNA aminoacylation	10	3	0.57	0.01651
21	GO:0030001	metal ion transport	257	12	14.69	0.01807
22	GO:0006429	leucyl-tRNA aminoacylation	4	2	0.23	0.01813
23	GO:0006438	valyl-tRNA aminoacylation	19	4	1.09	0.02065
24	GO:0008299	isoprenoid biosynthetic process	41	6	2.34	0.02786
25	GO:0006430	lysyl-tRNA aminoacylation	5	2	0.29	0.02908
26	GO:0007030	Golgi organization	6	2	0.34	0.04199
27	GO:0006003	fructose 2,6-bisphosphate metabolic proc...	6	2	0.34	0.04199
28	GO:0006812	cation transport	413	23	23.61	0.04364
29	GO:0006021	inositol biosynthetic process	15	3	0.86	0.05062
30	GO:0032012	regulation of ARF protein signal transdu...	15	3	0.86	0.05062
31	GO:0007165	signal transduction	1420	84	81.18	0.05189
32	GO:0006955	immune response	13	3	0.74	0.05651
33	GO:0001678	cellular glucose homeostasis	7	2	0.4	0.05659
34	GO:0007218	neuropeptide signaling pathway	7	2	0.4	0.05659
35	GO:0042274	ribosomal small subunit biogenesis	3	2	0.17	0.05711
36	GO:0008284	positive regulation of cell proliferatio...	1	1	0.06	0.05717
37	GO:0031554	regulation of DNA-templated transcriptio...	1	1	0.06	0.05717
38	GO:0007029	endoplasmic reticulum organization	1	1	0.06	0.05717
39	GO:0008543	fibroblast growth factor receptor signal...	1	1	0.06	0.05717
40	GO:0000266	mitochondrial fission	1	1	0.06	0.05717
41	GO:0042246	tissue regeneration	1	1	0.06	0.05717
42	GO:0006007	glucose catabolic process	1	1	0.06	0.05717
43	GO:0048598	embryonic morphogenesis	1	1	0.06	0.05717
44	GO:0006422	aspartyl-tRNA aminoacylation	1	1	0.06	0.05717
45	GO:0007163	establishment or maintenance of cell pol...	1	1	0.06	0.05717
46	GO:0008219	cell death	33	2	1.89	0.05723
47	GO:0007266	Rho protein signal transduction	109	6	6.23	0.05725
48	GO:0008654	phospholipid biosynthetic process	73	6	4.17	0.05807
49	GO:0033227	dsRNA transport	8	2	0.46	0.07265
50	GO:0006751	glutathione catabolic process	18	3	1.03	0.08006
51	GO:0005991	trehalose metabolic process	20	4	1.14	0.08971
52	GO:0006094	gluconeogenesis	20	3	1.14	0.10294
53	GO:0006810	transport	2608	187	149.1	0.10921
54	GO:0007188	adenylate cyclase-modulating G-protein c...	2	1	0.11	0.11108
55	GO:0008295	spermidine biosynthetic process	2	1	0.11	0.11108
56	GO:0032469	endoplasmic reticulum calcium ion homeos...	2	1	0.11	0.11108
57	GO:0006120	mitochondrial electron transport, NADH t...	2	1	0.11	0.11108
58	GO:0035434	copper ion transmembrane transport	2	1	0.11	0.11108
59	GO:0051090	regulation of DNA binding transcription ...	2	1	0.11	0.11108
60	GO:0034333	adherens junction assembly	2	1	0.11	0.11108
61	GO:0006597	spermine biosynthetic process	2	1	0.11	0.11108
62	GO:0051013	microtubule severing	2	1	0.11	0.11108
63	GO:0000462	maturation of SSU-rRNA from tricistronic...	2	1	0.11	0.11108
64	GO:0000469	cleavage involved in rRNA processing	2	1	0.11	0.11108
65	GO:0006465	signal peptide processing	2	1	0.11	0.11108
66	GO:0032218	riboflavin transport	2	1	0.11	0.11108
67	GO:0006836	neurotransmitter transport	86	8	4.92	0.11793
68	GO:0006629	lipid metabolic process	449	34	25.67	0.11962
69	GO:0006486	protein glycosylation	70	7	4	0.12033
70	GO:0006950	response to stress	401	26	22.93	0.12659
71	GO:0046855	inositol phosphate dephosphorylation	11	2	0.63	0.12757
72	GO:0046835	carbohydrate phosphorylation	11	2	0.63	0.12757
73	GO:0005992	trehalose biosynthetic process	11	2	0.63	0.12757
74	GO:0015914	phospholipid transport	11	2	0.63	0.12757
75	GO:0018342	protein prenylation	28	4	1.6	0.12784
76	GO:0009072	aromatic amino acid family metabolic pro...	36	4	2.06	0.14801
77	GO:0006869	lipid transport	98	9	5.6	0.14932
78	GO:0007166	cell surface receptor signaling pathway	171	13	9.78	0.15489
79	GO:0023052	signaling	1433	85	81.92	0.16145
80	GO:0000012	single strand break repair	3	1	0.17	0.16190
81	GO:0050793	regulation of developmental process	3	1	0.17	0.16190
82	GO:0006423	cysteinyl-tRNA aminoacylation	3	1	0.17	0.16190
83	GO:0016311	dephosphorylation	164	9	9.38	0.18455
84	GO:0006098	pentose-phosphate shunt	14	2	0.8	0.18902
85	GO:0046488	phosphatidylinositol metabolic process	103	6	5.89	0.18940
86	GO:0030244	cellulose biosynthetic process	4	1	0.23	0.20983
87	GO:0042744	hydrogen peroxide catabolic process	4	1	0.23	0.20983
88	GO:0042254	ribosome biogenesis	90	6	5.15	0.24280
89	GO:0006744	ubiquinone biosynthetic process	17	2	0.97	0.25346
90	GO:0002098	tRNA wobble uridine modification	17	2	0.97	0.25346
91	GO:0006672	ceramide metabolic process	5	1	0.29	0.25501
92	GO:0007016	cytoskeletal anchoring at plasma membran...	5	1	0.29	0.25501
93	GO:0030111	regulation of Wnt signaling pathway	5	1	0.29	0.25501
94	GO:0006378	mRNA polyadenylation	5	1	0.29	0.25501
95	GO:0009228	thiamine biosynthetic process	5	1	0.29	0.25501
96	GO:0006493	protein O-linked glycosylation	5	1	0.29	0.25501
97	GO:0035065	regulation of histone acetylation	5	1	0.29	0.25501
98	GO:0006436	tryptophanyl-tRNA aminoacylation	5	1	0.29	0.25501
99	GO:0019752	carboxylic acid metabolic process	607	49	34.7	0.25845
100	GO:0009298	GDP-mannose biosynthetic process	18	2	1.03	0.27514
101	GO:0006518	peptide metabolic process	789	67	45.11	0.29080
102	GO:0051056	regulation of small GTPase mediated sign...	142	10	8.12	0.29630
103	GO:0043631	RNA polyadenylation	11	2	0.63	0.29740
104	GO:0018344	protein geranylgeranylation	6	1	0.34	0.29762
105	GO:0030154	cell differentiation	6	1	0.34	0.29762
106	GO:0045087	innate immune response	6	1	0.34	0.29762
107	GO:0006275	regulation of DNA replication	6	1	0.34	0.29762
108	GO:0016575	histone deacetylation	6	1	0.34	0.29762
109	GO:0006412	translation	737	60	42.13	0.30707
110	GO:0022904	respiratory electron transport chain	15	2	0.86	0.33761
111	GO:0097428	protein maturation by iron-sulfur cluste...	7	1	0.4	0.33779
112	GO:0034227	tRNA thio-modification	7	1	0.4	0.33779
113	GO:0006000	fructose metabolic process	7	1	0.4	0.33779
114	GO:0006424	glutamyl-tRNA aminoacylation	7	1	0.4	0.33779
115	GO:0048278	vesicle docking	42	2	2.4	0.33812
116	GO:0016570	histone modification	45	4	2.57	0.33936
117	GO:0016042	lipid catabolic process	20	2	1.14	0.37555
118	GO:0039694	viral RNA genome replication	8	1	0.46	0.37567
119	GO:0016180	snRNA processing	8	1	0.46	0.37567
120	GO:0006857	oligopeptide transport	8	1	0.46	0.37567
121	GO:0009395	phospholipid catabolic process	8	1	0.46	0.37567
122	GO:0051205	protein insertion into membrane	8	1	0.46	0.37567
123	GO:0006415	translational termination	24	2	1.37	0.40237
124	GO:0007155	cell adhesion	106	7	6.06	0.40358
125	GO:0006665	sphingolipid metabolic process	14	2	0.8	0.41111
126	GO:0031123	RNA 3'-end processing	18	2	1.03	0.41119
127	GO:0009435	NAD biosynthetic process	9	1	0.51	0.41138
128	GO:0000398	mRNA splicing, via spliceosome	77	5	4.4	0.41239
129	GO:0006914	autophagy	25	2	1.43	0.42264
130	GO:0006750	glutathione biosynthetic process	25	2	1.43	0.42264
131	GO:0006351	transcription, DNA-templated	943	59	53.91	0.44387
132	GO:0017004	cytochrome complex assembly	11	1	0.63	0.47680
133	GO:0007219	Notch signaling pathway	11	1	0.63	0.47680
134	GO:0005975	carbohydrate metabolic process	736	46	42.08	0.48642
135	GO:0006457	protein folding	134	8	7.66	0.50200
136	GO:0016485	protein processing	14	2	0.8	0.50635
137	GO:0007172	signal complex assembly	12	1	0.69	0.50673
138	GO:0000042	protein targeting to Golgi	12	1	0.69	0.50673
139	GO:0006370	7-methylguanosine mRNA capping	12	1	0.69	0.50673
140	GO:0030488	tRNA methylation	12	1	0.69	0.50673
141	GO:0046168	glycerol-3-phosphate catabolic process	12	1	0.69	0.50673
142	GO:0000160	phosphorelay signal transduction system	30	2	1.72	0.51814
143	GO:0007178	transmembrane receptor protein serine/th...	13	1	0.74	0.53495
144	GO:0051103	DNA ligation involved in DNA repair	13	1	0.74	0.53495
145	GO:0042545	cell wall modification	13	1	0.74	0.53495
146	GO:0006418	tRNA aminoacylation for protein translat...	212	29	12.12	0.55308
147	GO:0006183	GTP biosynthetic process	14	1	0.8	0.56156
148	GO:0006228	UTP biosynthetic process	14	1	0.8	0.56156
149	GO:0006165	nucleoside diphosphate phosphorylation	82	4	4.69	0.56196
150	GO:0006355	regulation of transcription, DNA-templat...	747	44	42.71	0.56975
151	GO:0006334	nucleosome assembly	15	1	0.86	0.58665
152	GO:0006383	transcription from RNA polymerase III pr...	16	1	0.91	0.61031
153	GO:0006241	CTP biosynthetic process	16	1	0.91	0.61031
154	GO:0042981	regulation of apoptotic process	16	1	0.91	0.61031
155	GO:0003333	amino acid transmembrane transport	74	4	4.23	0.61745
156	GO:0043087	regulation of GTPase activity	36	2	2.06	0.61801
157	GO:0000413	protein peptidyl-prolyl isomerization	36	2	2.06	0.61801
158	GO:0006479	protein methylation	36	2	2.06	0.61801
159	GO:0055114	oxidation-reduction process	1668	91	95.36	0.61949
160	GO:0006468	protein phosphorylation	871	48	49.8	0.62848
161	GO:0006596	polyamine biosynthetic process	19	2	1.09	0.63221
162	GO:0046854	phosphatidylinositol phosphorylation	37	2	2.12	0.63302
163	GO:0016567	protein ubiquitination	38	2	2.17	0.64756
164	GO:0016226	iron-sulfur cluster assembly	18	1	1.03	0.65364
165	GO:0048870	cell motility	19	1	1.09	0.67347
166	GO:0006487	protein N-linked glycosylation	19	1	1.09	0.67347
167	GO:0006887	exocytosis	54	2	3.09	0.67391
168	GO:0046856	phosphatidylinositol dephosphorylation	20	1	1.14	0.69216
169	GO:0008218	bioluminescence	20	1	1.14	0.69216
170	GO:0000245	spliceosomal complex assembly	20	1	1.14	0.69216
171	GO:0007186	G-protein coupled receptor signaling pat...	397	23	22.7	0.69763
172	GO:0006813	potassium ion transport	98	4	5.6	0.70726
173	GO:0006807	nitrogen compound metabolic process	6768	370	386.93	0.70780
174	GO:1901137	carbohydrate derivative biosynthetic pro...	294	13	16.81	0.71139
175	GO:0016579	protein deubiquitination	105	5	6	0.72415
176	GO:0007205	protein kinase C-activating G-protein co...	22	1	1.26	0.72640
177	GO:0006261	DNA-dependent DNA replication	68	2	3.89	0.72710
178	GO:0001522	pseudouridine synthesis	45	2	2.57	0.73680
179	GO:0015991	ATP hydrolysis coupled proton transport	45	2	2.57	0.73680
180	GO:0009058	biosynthetic process	2947	175	168.48	0.74399
181	GO:0035023	regulation of Rho protein signal transdu...	108	5	6.17	0.74666
182	GO:0008643	carbohydrate transport	46	2	2.63	0.74784
183	GO:0006096	glycolytic process	68	3	3.89	0.75419
184	GO:0007169	transmembrane receptor protein tyrosine ...	25	2	1.43	0.75643
185	GO:0050482	arachidonic acid secretion	24	1	1.37	0.75683
186	GO:0006357	regulation of transcription from RNA pol...	62	4	3.54	0.75780
187	GO:0006730	one-carbon metabolic process	25	1	1.43	0.77076
188	GO:0006511	ubiquitin-dependent protein catabolic pr...	153	7	8.75	0.77857
189	GO:0006644	phospholipid metabolic process	180	13	10.29	0.78258
190	GO:0042147	retrograde transport, endosome to Golgi	28	1	1.6	0.80793
191	GO:0006414	translational elongation	54	2	3.09	0.82259
192	GO:0007264	small GTPase mediated signal transductio...	221	14	12.63	0.82903
193	GO:0006289	nucleotide-excision repair	30	1	1.72	0.82930
194	GO:0006400	tRNA modification	62	4	3.54	0.83864
195	GO:0009166	nucleotide catabolic process	31	1	1.77	0.83908
196	GO:0006520	cellular amino acid metabolic process	429	41	24.53	0.84198
197	GO:0015986	ATP synthesis coupled proton transport	32	1	1.83	0.84830
198	GO:0006506	GPI anchor biosynthetic process	32	1	1.83	0.84830
199	GO:0051259	protein oligomerization	34	1	1.94	0.86519
200	GO:0006396	RNA processing	504	21	28.81	0.86883
201	GO:0006904	vesicle docking involved in exocytosis	35	1	2	0.87291
202	GO:0071805	potassium ion transmembrane transport	35	1	2	0.87291
203	GO:0006811	ion transport	865	41	49.45	0.88428
204	GO:0006413	translational initiation	39	1	2.23	0.89964
205	GO:0007608	sensory perception of smell	67	2	3.83	0.90247
206	GO:0070588	calcium ion transmembrane transport	40	1	2.29	0.90539
207	GO:0007017	microtubule-based process	217	3	12.41	0.91294
208	GO:0006139	nucleobase-containing compound metabolic...	3383	149	193.41	0.91709
209	GO:0006030	chitin metabolic process	71	2	4.06	0.91931
210	GO:0006352	DNA-templated transcription, initiation	62	6	3.54	0.92434
211	GO:0006270	DNA replication initiation	46	1	2.63	0.93361
212	GO:0051726	regulation of cell cycle	47	1	2.69	0.93742
213	GO:0007275	multicellular organism development	57	2	3.26	0.94091
214	GO:0009116	nucleoside metabolic process	95	2	5.43	0.94135
215	GO:0006401	RNA catabolic process	50	1	2.86	0.94758
216	GO:0006470	protein dephosphorylation	107	3	6.12	0.94850
217	GO:0051276	chromosome organization	176	6	10.06	0.96560
218	GO:0006814	sodium ion transport	64	1	3.66	0.97708
219	GO:0035556	intracellular signal transduction	538	25	30.76	0.97812
220	GO:0045454	cell redox homeostasis	98	2	5.6	0.97862
221	GO:0007049	cell cycle	117	2	6.69	0.98407
222	GO:0033014	tetrapyrrole biosynthetic process	71	1	4.06	0.98485
223	GO:0006310	DNA recombination	308	3	17.61	0.98863
224	GO:0006464	cellular protein modification process	1466	79	83.81	0.99169
225	GO:0009190	cyclic nucleotide biosynthetic process	85	1	4.86	0.99339
226	GO:0006260	DNA replication	236	6	13.49	0.99649
227	GO:0007018	microtubule-based movement	119	1	6.8	0.99912
228	GO:0008152	metabolic process	10111	554	578.05	0.99922
229	GO:0006281	DNA repair	260	6	14.86	0.99969
230	GO:0006313	transposition, DNA-mediated	199	1	11.38	0.99999
231	GO:0015074	DNA integration	359	5	20.52	0.99999
232	GO:0046128	purine ribonucleoside metabolic process	41	1	2.34	1.00000
233	GO:0046129	purine ribonucleoside biosynthetic proce...	31	1	1.77	1.00000
234	GO:0044255	cellular lipid metabolic process	269	21	15.38	1.00000
235	GO:0033692	cellular polysaccharide biosynthetic pro...	40	1	2.29	1.00000
236	GO:0044257	cellular protein catabolic process	180	7	10.29	1.00000
237	GO:0010646	regulation of cell communication	190	12	10.86	1.00000
238	GO:0048522	positive regulation of cellular process	69	3	3.94	1.00000
239	GO:0140056	organelle localization by membrane tethe...	42	2	2.4	1.00000
240	GO:0044281	small molecule metabolic process	1237	77	70.72	1.00000
241	GO:0012501	programmed cell death	32	1	1.83	1.00000
242	GO:1901571	fatty acid derivative transport	24	1	1.37	1.00000
243	GO:0044282	small molecule catabolic process	63	7	3.6	1.00000
244	GO:0006743	ubiquinone metabolic process	17	2	0.97	1.00000
245	GO:0019693	ribose phosphate metabolic process	256	13	14.64	1.00000
246	GO:0044283	small molecule biosynthetic process	225	12	12.86	1.00000
247	GO:0034637	cellular carbohydrate biosynthetic proce...	67	6	3.83	1.00000
248	GO:0046903	secretion	83	3	4.75	1.00000
249	GO:1901575	organic substance catabolic process	504	32	28.81	1.00000
250	GO:0019751	polyol metabolic process	46	5	2.63	1.00000
251	GO:1901576	organic substance biosynthetic process	2793	168	159.68	1.00000
252	GO:0043067	regulation of programmed cell death	16	1	0.91	1.00000
253	GO:0006403	RNA localization	17	2	0.97	1.00000
254	GO:0046907	intracellular transport	390	37	22.3	1.00000
255	GO:0022900	electron transport chain	19	2	1.09	1.00000
256	GO:0044344	cellular response to fibroblast growth f...	1	1	0.06	1.00000
257	GO:0006749	glutathione metabolic process	43	5	2.46	1.00000
258	GO:2000756	regulation of peptidyl-lysine acetylatio...	5	1	0.29	1.00000
259	GO:0044270	cellular nitrogen compound catabolic pro...	111	2	6.35	1.00000
260	GO:0048518	positive regulation of biological proces...	74	3	4.23	1.00000
261	GO:0044271	cellular nitrogen compound biosynthetic ...	2145	134	122.63	1.00000
262	GO:0006732	coenzyme metabolic process	194	13	11.09	1.00000
263	GO:0044272	sulfur compound biosynthetic process	57	3	3.26	1.00000
264	GO:0006733	oxidoreduction coenzyme metabolic proces...	118	8	6.75	1.00000
265	GO:0044273	sulfur compound catabolic process	21	3	1.2	1.00000
266	GO:0071495	cellular response to endogenous stimulus	49	1	2.8	1.00000
267	GO:0008380	RNA splicing	94	5	5.37	1.00000
268	GO:0006739	NADP metabolic process	21	2	1.2	1.00000
269	GO:0040011	locomotion	19	1	1.09	1.00000
270	GO:0071545	inositol phosphate catabolic process	11	2	0.63	1.00000
271	GO:0046131	pyrimidine ribonucleoside metabolic proc...	19	1	1.09	1.00000
272	GO:0046132	pyrimidine ribonucleoside biosynthetic p...	18	1	1.03	1.00000
273	GO:0031323	regulation of cellular metabolic process	806	45	46.08	1.00000
274	GO:0046134	pyrimidine nucleoside biosynthetic proce...	18	1	1.03	1.00000
275	GO:0031325	positive regulation of cellular metaboli...	42	2	2.4	1.00000
276	GO:0031326	regulation of cellular biosynthetic proc...	773	45	44.19	1.00000
277	GO:0009653	anatomical structure morphogenesis	9	1	0.51	1.00000
278	GO:0031328	positive regulation of cellular biosynth...	26	2	1.49	1.00000
279	GO:0042157	lipoprotein metabolic process	37	1	2.12	1.00000
280	GO:0001510	RNA methylation	31	1	1.77	1.00000
281	GO:0042158	lipoprotein biosynthetic process	33	1	1.89	1.00000
282	GO:0052646	alditol phosphate metabolic process	29	1	1.66	1.00000
283	GO:0009719	response to endogenous stimulus	50	1	2.86	1.00000
284	GO:0006612	protein targeting to membrane	25	8	1.43	1.00000
285	GO:0006613	cotranslational protein targeting to mem...	25	8	1.43	1.00000
286	GO:0008033	tRNA processing	144	4	8.23	1.00000
287	GO:0090304	nucleic acid metabolic process	2819	128	161.16	1.00000
288	GO:0019438	aromatic compound biosynthetic process	1353	67	77.35	1.00000
289	GO:0042180	cellular ketone metabolic process	25	2	1.43	1.00000
290	GO:0140029	exocytic process	35	1	2	1.00000
291	GO:0098771	inorganic ion homeostasis	23	1	1.31	1.00000
292	GO:0090305	nucleic acid phosphodiester bond hydroly...	12	1	0.69	1.00000
293	GO:0010941	regulation of cell death	16	1	0.91	1.00000
294	GO:0042181	ketone biosynthetic process	18	2	1.03	1.00000
295	GO:0019439	aromatic compound catabolic process	107	2	6.12	1.00000
296	GO:0072657	protein localization to membrane	33	9	1.89	1.00000
297	GO:0010604	positive regulation of macromolecule met...	32	2	1.83	1.00000
298	GO:0019725	cellular homeostasis	118	5	6.75	1.00000
299	GO:0098660	inorganic ion transmembrane transport	153	6	8.75	1.00000
300	GO:0098662	inorganic cation transmembrane transport	152	6	8.69	1.00000
301	GO:0006643	membrane lipid metabolic process	46	3	2.63	1.00000
302	GO:0070887	cellular response to chemical stimulus	58	1	3.32	1.00000
303	GO:0046390	ribose phosphate biosynthetic process	144	2	8.23	1.00000
304	GO:0044242	cellular lipid catabolic process	12	1	0.69	1.00000
305	GO:0046394	carboxylic acid biosynthetic process	130	3	7.43	1.00000
306	GO:0046395	carboxylic acid catabolic process	43	4	2.46	1.00000
307	GO:0046051	UTP metabolic process	14	1	0.8	1.00000
308	GO:0044248	cellular catabolic process	399	20	22.81	1.00000
309	GO:0044249	cellular biosynthetic process	2768	165	158.25	1.00000
310	GO:0006974	cellular response to DNA damage stimulus	272	6	15.55	1.00000
311	GO:0098655	cation transmembrane transport	152	6	8.69	1.00000
312	GO:0098656	anion transmembrane transport	82	4	4.69	1.00000
313	GO:0019682	glyceraldehyde-3-phosphate metabolic pro...	15	2	0.86	1.00000
314	GO:0009966	regulation of signal transduction	189	12	10.81	1.00000
315	GO:0045893	positive regulation of transcription, DN...	19	2	1.09	1.00000
316	GO:0008283	cell proliferation	2	1	0.11	1.00000
317	GO:0044237	cellular metabolic process	6452	325	368.86	1.00000
318	GO:0042127	regulation of cell proliferation	2	1	0.11	1.00000
319	GO:0044238	primary metabolic process	7459	418	426.43	1.00000
320	GO:1902680	positive regulation of RNA biosynthetic ...	19	2	1.09	1.00000
321	GO:0016197	endosomal transport	28	1	1.6	1.00000
322	GO:0045944	positive regulation of transcription fro...	15	2	0.86	1.00000
323	GO:0046834	lipid phosphorylation	37	2	2.12	1.00000
324	GO:0032501	multicellular organismal process	156	4	8.92	1.00000
325	GO:0050801	ion homeostasis	23	1	1.31	1.00000
326	GO:0032502	developmental process	58	3	3.32	1.00000
327	GO:0006928	movement of cell or subcellular componen...	138	2	7.89	1.00000
328	GO:0046838	phosphorylated carbohydrate dephosphoryl...	11	2	0.63	1.00000
329	GO:0046839	phospholipid dephosphorylation	20	1	1.14	1.00000
330	GO:0009611	response to wounding	1	1	0.06	1.00000
331	GO:0043043	peptide biosynthetic process	763	62	43.62	1.00000
332	GO:0032507	maintenance of protein location in cell	6	1	0.34	1.00000
333	GO:0019673	GDP-mannose metabolic process	22	2	1.26	1.00000
334	GO:0019674	NAD metabolic process	14	1	0.8	1.00000
335	GO:0006163	purine nucleotide metabolic process	260	11	14.86	1.00000
336	GO:0006164	purine nucleotide biosynthetic process	155	2	8.86	1.00000
337	GO:0045184	establishment of protein localization	405	46	23.15	1.00000
338	GO:0045185	maintenance of protein location	6	1	0.34	1.00000
339	GO:0006915	apoptotic process	32	1	1.83	1.00000
340	GO:0045935	positive regulation of nucleobase-contai...	19	2	1.09	1.00000
341	GO:0051651	maintenance of location in cell	6	1	0.34	1.00000
342	GO:0009199	ribonucleoside triphosphate metabolic pr...	139	6	7.95	1.00000
343	GO:0098732	macromolecule deacylation	6	1	0.34	1.00000
344	GO:0042886	amide transport	420	46	24.01	1.00000
345	GO:0009987	cellular process	8565	422	489.66	1.00000
346	GO:0040007	growth	5	1	0.29	1.00000
347	GO:0046364	monosaccharide biosynthetic process	20	3	1.14	1.00000
348	GO:0046365	monosaccharide catabolic process	6	1	0.34	1.00000
349	GO:0051716	cellular response to stimulus	1696	90	96.96	1.00000
350	GO:0065003	macromolecular complex assembly	198	5	11.32	1.00000
351	GO:0065004	protein-DNA complex assembly	29	1	1.66	1.00000
352	GO:0043038	amino acid activation	219	29	12.52	1.00000
353	GO:0043039	tRNA aminoacylation	219	29	12.52	1.00000
354	GO:0065007	biological regulation	2472	137	141.32	1.00000
355	GO:0030163	protein catabolic process	190	7	10.86	1.00000
356	GO:0065008	regulation of biological quality	195	6	11.15	1.00000
357	GO:0061024	membrane organization	38	1	2.17	1.00000
358	GO:0065009	regulation of molecular function	66	3	3.77	1.00000
359	GO:0070848	response to growth factor	17	1	0.97	1.00000
360	GO:0046351	disaccharide biosynthetic process	12	2	0.69	1.00000
361	GO:0006605	protein targeting	58	9	3.32	1.00000
362	GO:0005996	monosaccharide metabolic process	87	5	4.97	1.00000
363	GO:0008213	protein alkylation	36	2	2.06	1.00000
364	GO:0070085	glycosylation	72	7	4.12	1.00000
365	GO:0008215	spermine metabolic process	2	1	0.11	1.00000
366	GO:0008216	spermidine metabolic process	2	1	0.11	1.00000
367	GO:0010876	lipid localization	103	9	5.89	1.00000
368	GO:0051674	localization of cell	19	1	1.09	1.00000
369	GO:0070838	divalent metal ion transport	57	1	3.26	1.00000
370	GO:0198738	cell-cell signaling by wnt	32	1	1.83	1.00000
371	GO:0042060	wound healing	1	1	0.06	1.00000
372	GO:0009161	ribonucleoside monophosphate metabolic p...	144	5	8.23	1.00000
373	GO:0009163	nucleoside biosynthetic process	35	1	2	1.00000
374	GO:0009165	nucleotide biosynthetic process	248	4	14.18	1.00000
375	GO:0009167	purine ribonucleoside monophosphate meta...	137	5	7.83	1.00000
376	GO:0009168	purine ribonucleoside monophosphate bios...	55	1	3.14	1.00000
377	GO:0015992	proton transport	85	3	4.86	1.00000
378	GO:0034067	protein localization to Golgi apparatus	12	1	0.69	1.00000
379	GO:0032784	regulation of DNA-templated transcriptio...	7	2	0.4	1.00000
380	GO:0007010	cytoskeleton organization	111	2	6.35	1.00000
381	GO:0006865	amino acid transport	82	4	4.69	1.00000
382	GO:0046031	ADP metabolic process	69	3	3.94	1.00000
383	GO:0090501	RNA phosphodiester bond hydrolysis	8	1	0.46	1.00000
384	GO:0009891	positive regulation of biosynthetic proc...	26	2	1.49	1.00000
385	GO:0032786	positive regulation of DNA-templated tra...	6	2	0.34	1.00000
386	GO:0032787	monocarboxylic acid metabolic process	125	6	7.15	1.00000
387	GO:0019637	organophosphate metabolic process	648	32	37.05	1.00000
388	GO:0009893	positive regulation of metabolic process	42	2	2.4	1.00000
389	GO:0009150	purine ribonucleotide metabolic process	238	11	13.61	1.00000
390	GO:0046034	ATP metabolic process	115	5	6.57	1.00000
391	GO:1903825	organic acid transmembrane transport	80	4	4.57	1.00000
392	GO:0015711	organic anion transport	133	8	7.6	1.00000
393	GO:0009152	purine ribonucleotide biosynthetic proce...	140	2	8	1.00000
394	GO:0032446	protein modification by small protein co...	45	2	2.57	1.00000
395	GO:0046036	CTP metabolic process	16	1	0.91	1.00000
396	GO:0042398	cellular modified amino acid biosyntheti...	35	2	2	1.00000
397	GO:0046039	GTP metabolic process	22	1	1.26	1.00000
398	GO:0009156	ribonucleoside monophosphate biosyntheti...	62	1	3.54	1.00000
399	GO:0071774	response to fibroblast growth factor	1	1	0.06	1.00000
400	GO:0015718	monocarboxylic acid transport	34	1	1.94	1.00000
401	GO:0031497	chromatin assembly	15	1	0.86	1.00000
402	GO:0032774	RNA biosynthetic process	952	59	54.43	1.00000
403	GO:0006090	pyruvate metabolic process	72	3	4.12	1.00000
404	GO:0051640	organelle localization	44	2	2.52	1.00000
405	GO:0051641	cellular localization	450	41	25.73	1.00000
406	GO:0009185	ribonucleoside diphosphate metabolic pro...	69	3	3.94	1.00000
407	GO:0006119	oxidative phosphorylation	8	1	0.46	1.00000
408	GO:0006091	generation of precursor metabolites and ...	144	5	8.23	1.00000
409	GO:0009187	cyclic nucleotide metabolic process	85	1	4.86	1.00000
410	GO:0072600	establishment of protein localization to...	12	1	0.69	1.00000
411	GO:0015748	organophosphate ester transport	11	2	0.63	1.00000
412	GO:0051704	multi-organism process	20	1	1.14	1.00000
413	GO:0051649	establishment of localization in cell	391	37	22.35	1.00000
414	GO:0015672	monovalent inorganic cation transport	243	7	13.89	1.00000
415	GO:0019941	modification-dependent protein catabolic...	153	7	8.75	1.00000
416	GO:0007265	Ras protein signal transduction	124	9	7.09	1.00000
417	GO:0009179	purine ribonucleoside diphosphate metabo...	69	3	3.94	1.00000
418	GO:0071715	icosanoid transport	24	1	1.37	1.00000
419	GO:1901661	quinone metabolic process	18	2	1.03	1.00000
420	GO:0006873	cellular ion homeostasis	11	1	0.63	1.00000
421	GO:0007267	cell-cell signaling	42	1	2.4	1.00000
422	GO:1901663	quinone biosynthetic process	18	2	1.03	1.00000
423	GO:0006874	cellular calcium ion homeostasis	3	1	0.17	1.00000
424	GO:0005984	disaccharide metabolic process	21	4	1.2	1.00000
425	GO:0006875	cellular metal ion homeostasis	10	1	0.57	1.00000
426	GO:1902600	hydrogen ion transmembrane transport	75	3	4.29	1.00000
427	GO:0042364	water-soluble vitamin biosynthetic proce...	42	1	2.4	1.00000
428	GO:0043241	protein complex disassembly	29	3	1.66	1.00000
429	GO:0009123	nucleoside monophosphate metabolic proce...	146	5	8.35	1.00000
430	GO:0009124	nucleoside monophosphate biosynthetic pr...	64	1	3.66	1.00000
431	GO:0043244	regulation of protein complex disassembl...	10	1	0.57	1.00000
432	GO:0019184	nonribosomal peptide biosynthetic proces...	26	2	1.49	1.00000
433	GO:0009126	purine nucleoside monophosphate metaboli...	137	5	7.83	1.00000
434	GO:0009127	purine nucleoside monophosphate biosynth...	55	1	3.14	1.00000
435	GO:0006820	anion transport	216	8	12.35	1.00000
436	GO:0000041	transition metal ion transport	7	1	0.4	1.00000
437	GO:0006825	copper ion transport	3	1	0.17	1.00000
438	GO:0005976	polysaccharide metabolic process	43	1	2.46	1.00000
439	GO:1901657	glycosyl compound metabolic process	95	2	5.43	1.00000
440	GO:0009110	vitamin biosynthetic process	42	1	2.4	1.00000
441	GO:1901659	glycosyl compound biosynthetic process	35	1	2	1.00000
442	GO:0097659	nucleic acid-templated transcription	943	59	53.91	1.00000
443	GO:0033865	nucleoside bisphosphate metabolic proces...	27	5	1.54	1.00000
444	GO:0009117	nucleotide metabolic process	408	16	23.33	1.00000
445	GO:0015980	energy derivation by oxidation of organi...	72	2	4.12	1.00000
446	GO:0009119	ribonucleoside metabolic process	46	1	2.63	1.00000
447	GO:0006066	alcohol metabolic process	51	5	2.92	1.00000
448	GO:0015985	energy coupled proton transport, down el...	32	1	1.83	1.00000
449	GO:0000375	RNA splicing, via transesterification re...	77	5	4.4	1.00000
450	GO:0006816	calcium ion transport	45	1	2.57	1.00000
451	GO:0000377	RNA splicing, via transesterification re...	77	5	4.4	1.00000
452	GO:0015988	energy coupled proton transmembrane tran...	45	2	2.57	1.00000
453	GO:0006818	hydrogen transport	85	3	4.86	1.00000
454	GO:0018205	peptidyl-lysine modification	42	1	2.4	1.00000
455	GO:0007005	mitochondrion organization	44	1	2.52	1.00000
456	GO:0009141	nucleoside triphosphate metabolic proces...	149	6	8.52	1.00000
457	GO:0051156	glucose 6-phosphate metabolic process	14	2	0.8	1.00000
458	GO:0009142	nucleoside triphosphate biosynthetic pro...	49	2	2.8	1.00000
459	GO:0018208	peptidyl-proline modification	36	2	2.06	1.00000
460	GO:0009888	tissue development	1	1	0.06	1.00000
461	GO:0009144	purine nucleoside triphosphate metabolic...	137	6	7.83	1.00000
462	GO:0044419	interspecies interaction between organis...	12	1	0.69	1.00000
463	GO:0009889	regulation of biosynthetic process	773	45	44.19	1.00000
464	GO:0009145	purine nucleoside triphosphate biosynthe...	47	2	2.69	1.00000
465	GO:0006397	mRNA processing	142	7	8.12	1.00000
466	GO:0051603	proteolysis involved in cellular protein...	180	7	10.29	1.00000
467	GO:0009147	pyrimidine nucleoside triphosphate metab...	22	1	1.26	1.00000
468	GO:0051604	protein maturation	26	3	1.49	1.00000
469	GO:0009148	pyrimidine nucleoside triphosphate biosy...	16	1	0.91	1.00000
470	GO:0006399	tRNA metabolic process	363	33	20.75	1.00000
471	GO:0051180	vitamin transport	5	1	0.29	1.00000
472	GO:0090662	ATP hydrolysis coupled transmembrane tra...	45	2	2.57	1.00000
473	GO:0051186	cofactor metabolic process	251	14	14.35	1.00000
474	GO:2000112	regulation of cellular macromolecule bio...	773	45	44.19	1.00000
475	GO:0009132	nucleoside diphosphate metabolic process	86	4	4.92	1.00000
476	GO:0051188	cofactor biosynthetic process	148	4	8.46	1.00000
477	GO:0055065	metal ion homeostasis	12	1	0.69	1.00000
478	GO:0006081	cellular aldehyde metabolic process	29	2	1.66	1.00000
479	GO:0009135	purine nucleoside diphosphate metabolic ...	69	3	3.94	1.00000
480	GO:0070271	protein complex biogenesis	135	3	7.72	1.00000
481	GO:0034032	purine nucleoside bisphosphate metabolic...	27	5	1.54	1.00000
482	GO:0006082	organic acid metabolic process	615	49	35.16	1.00000
483	GO:0048193	Golgi vesicle transport	73	12	4.17	1.00000
484	GO:0051171	regulation of nitrogen compound metaboli...	795	45	45.45	1.00000
485	GO:0043543	protein acylation	24	1	1.37	1.00000
486	GO:0051173	positive regulation of nitrogen compound...	32	2	1.83	1.00000
487	GO:0010033	response to organic substance	64	1	3.66	1.00000
488	GO:0032196	transposition	199	1	11.38	1.00000
489	GO:0032984	macromolecular complex disassembly	41	3	2.34	1.00000
490	GO:0051179	localization	2649	190	151.44	1.00000
491	GO:0016051	carbohydrate biosynthetic process	91	9	5.2	1.00000
492	GO:0033875	ribonucleoside bisphosphate metabolic pr...	27	5	1.54	1.00000
493	GO:0016052	carbohydrate catabolic process	76	4	4.34	1.00000
494	GO:0042592	homeostatic process	160	5	9.15	1.00000
495	GO:0006072	glycerol-3-phosphate metabolic process	29	1	1.66	1.00000
496	GO:0071702	organic substance transport	680	64	38.88	1.00000
497	GO:0016053	organic acid biosynthetic process	130	3	7.43	1.00000
498	GO:0042593	glucose homeostasis	7	2	0.4	1.00000
499	GO:0006073	cellular glucan metabolic process	41	1	2.34	1.00000
500	GO:0071704	organic substance metabolic process	7832	446	447.76	1.00000
501	GO:0016054	organic acid catabolic process	43	4	2.46	1.00000
502	GO:0046578	regulation of Ras protein signal transdu...	123	8	7.03	1.00000
503	GO:0016055	Wnt signaling pathway	32	1	1.83	1.00000
504	GO:0034329	cell junction assembly	2	1	0.11	1.00000
505	GO:0071705	nitrogen compound transport	530	53	30.3	1.00000
506	GO:0009063	cellular amino acid catabolic process	37	4	2.12	1.00000
507	GO:0045017	glycerolipid biosynthetic process	36	1	2.06	1.00000
508	GO:1901615	organic hydroxy compound metabolic proce...	60	5	3.43	1.00000
509	GO:1901616	organic hydroxy compound catabolic proce...	13	2	0.74	1.00000
510	GO:0009066	aspartate family amino acid metabolic pr...	31	3	1.77	1.00000
511	GO:1901617	organic hydroxy compound biosynthetic pr...	25	3	1.43	1.00000
512	GO:0009067	aspartate family amino acid biosynthetic...	24	3	1.37	1.00000
513	GO:0002097	tRNA wobble base modification	18	2	1.03	1.00000
514	GO:0055080	cation homeostasis	22	1	1.26	1.00000
515	GO:0009069	serine family amino acid metabolic proce...	29	4	1.66	1.00000
516	GO:0055082	cellular chemical homeostasis	18	3	1.03	1.00000
517	GO:0051128	regulation of cellular component organiz...	50	2	2.86	1.00000
518	GO:0006364	rRNA processing	46	2	2.63	1.00000
519	GO:0000270	peptidoglycan metabolic process	30	7	1.72	1.00000
520	GO:0006020	inositol metabolic process	17	3	0.97	1.00000
521	GO:0000271	polysaccharide biosynthetic process	42	1	2.4	1.00000
522	GO:0055086	nucleobase-containing small molecule met...	474	17	27.1	1.00000
523	GO:0006366	transcription from RNA polymerase II pro...	95	10	5.43	1.00000
524	GO:0006022	aminoglycan metabolic process	109	9	6.23	1.00000
525	GO:1901983	regulation of protein acetylation	5	1	0.29	1.00000
526	GO:0010256	endomembrane system organization	13	3	0.74	1.00000
527	GO:0006026	aminoglycan catabolic process	30	7	1.72	1.00000
528	GO:0090407	organophosphate biosynthetic process	349	10	19.95	1.00000
529	GO:0006027	glycosaminoglycan catabolic process	29	7	1.66	1.00000
530	GO:0045047	protein targeting to ER	25	8	1.43	1.00000
531	GO:0009056	catabolic process	536	35	30.64	1.00000
532	GO:0009057	macromolecule catabolic process	275	15	15.72	1.00000
533	GO:0009100	glycoprotein metabolic process	73	7	4.17	1.00000
534	GO:0009059	macromolecule biosynthetic process	2072	134	118.46	1.00000
535	GO:0009101	glycoprotein biosynthetic process	70	7	4	1.00000
536	GO:0006353	DNA-templated transcription, termination	6	1	0.34	1.00000
537	GO:0016070	RNA metabolic process	1760	111	100.62	1.00000
538	GO:0055074	calcium ion homeostasis	3	1	0.17	1.00000
539	GO:0006354	DNA-templated transcription, elongation	17	5	0.97	1.00000
540	GO:0016071	mRNA metabolic process	193	7	11.03	1.00000
541	GO:0016072	rRNA metabolic process	50	2	2.86	1.00000
542	GO:0016073	snRNA metabolic process	8	1	0.46	1.00000
543	GO:0009108	coenzyme biosynthetic process	90	3	5.15	1.00000
544	GO:0015931	nucleobase-containing compound transport	23	2	1.31	1.00000
545	GO:0000226	microtubule cytoskeleton organization	57	1	3.26	1.00000
546	GO:0046496	nicotinamide nucleotide metabolic proces...	101	6	5.77	1.00000
547	GO:0044403	symbiosis, encompassing mutualism throug...	11	1	0.63	1.00000
548	GO:0034330	cell junction organization	2	1	0.11	1.00000
549	GO:1905114	cell surface receptor signaling pathway ...	32	1	1.83	1.00000
550	GO:0042278	purine nucleoside metabolic process	41	1	2.34	1.00000
551	GO:0034332	adherens junction organization	2	1	0.11	1.00000
552	GO:0006040	amino sugar metabolic process	74	2	4.23	1.00000
553	GO:0050790	regulation of catalytic activity	63	2	3.6	1.00000
554	GO:0042221	response to chemical	87	1	4.97	1.00000
555	GO:0009071	serine family amino acid catabolic proce...	10	4	0.57	1.00000
556	GO:0050794	regulation of cellular process	2335	133	133.49	1.00000
557	GO:0034220	ion transmembrane transport	234	10	13.38	1.00000
558	GO:0032940	secretion by cell	59	2	3.37	1.00000
559	GO:0019058	viral life cycle	11	1	0.63	1.00000
560	GO:0003008	system process	93	2	5.32	1.00000
561	GO:0097164	ammonium ion metabolic process	10	1	0.57	1.00000
562	GO:0000301	retrograde transport, vesicle recycling ...	12	1	0.69	1.00000
563	GO:0042219	cellular modified amino acid catabolic p...	21	3	1.2	1.00000
564	GO:0006266	DNA ligation	13	1	0.74	1.00000
565	GO:0006323	DNA packaging	20	1	1.14	1.00000
566	GO:0006325	chromatin organization	70	5	4	1.00000
567	GO:0010556	regulation of macromolecule biosynthetic...	773	45	44.19	1.00000
568	GO:0016043	cellular component organization	607	23	34.7	1.00000
569	GO:0010557	positive regulation of macromolecule bio...	26	2	1.49	1.00000
570	GO:0006595	polyamine metabolic process	19	2	1.09	1.00000
571	GO:1901605	alpha-amino acid metabolic process	145	7	8.29	1.00000
572	GO:0033365	protein localization to organelle	67	9	3.83	1.00000
573	GO:1901606	alpha-amino acid catabolic process	30	4	1.72	1.00000
574	GO:0046467	membrane lipid biosynthetic process	34	1	1.94	1.00000
575	GO:0034243	regulation of transcription elongation f...	3	2	0.17	1.00000
576	GO:1901607	alpha-amino acid biosynthetic process	94	3	5.37	1.00000
577	GO:0015908	fatty acid transport	24	1	1.37	1.00000
578	GO:0015909	long-chain fatty acid transport	24	1	1.37	1.00000
579	GO:0019079	viral genome replication	10	1	0.57	1.00000
580	GO:0045333	cellular respiration	39	2	2.23	1.00000
581	GO:0006259	DNA metabolic process	1094	18	62.54	1.00000
582	GO:0051052	regulation of DNA metabolic process	6	1	0.34	1.00000
583	GO:0019362	pyridine nucleotide metabolic process	101	6	5.77	1.00000
584	GO:0016032	viral process	11	1	0.63	1.00000
585	GO:0019363	pyridine nucleotide biosynthetic process	16	1	0.91	1.00000
586	GO:0008652	cellular amino acid biosynthetic process	103	3	5.89	1.00000
587	GO:0048869	cellular developmental process	6	1	0.34	1.00000
588	GO:0033013	tetrapyrrole metabolic process	74	1	4.23	1.00000
589	GO:0045229	external encapsulating structure organiz...	21	1	1.2	1.00000
590	GO:0043412	macromolecule modification	1603	85	91.64	1.00000
591	GO:0043413	macromolecule glycosylation	70	7	4	1.00000
592	GO:0043414	macromolecule methylation	71	3	4.06	1.00000
593	GO:0030258	lipid modification	63	3	3.6	1.00000
594	GO:0035601	protein deacylation	6	1	0.34	1.00000
595	GO:0048856	anatomical structure development	58	3	3.32	1.00000
596	GO:0006006	glucose metabolic process	31	4	1.77	1.00000
597	GO:0046483	heterocycle metabolic process	3536	151	202.15	1.00000
598	GO:0019359	nicotinamide nucleotide biosynthetic pro...	16	1	0.91	1.00000
599	GO:0046486	glycerolipid metabolic process	109	6	6.23	1.00000
600	GO:0033043	regulation of organelle organization	41	1	2.34	1.00000
601	GO:0033044	regulation of chromosome organization	11	1	0.63	1.00000
602	GO:0009260	ribonucleotide biosynthetic process	144	2	8.23	1.00000
603	GO:0016310	phosphorylation	1029	56	58.83	1.00000
604	GO:0045216	cell-cell junction organization	2	1	0.11	1.00000
605	GO:0006333	chromatin assembly or disassembly	16	1	0.91	1.00000
606	GO:0090150	establishment of protein localization to...	33	9	1.89	1.00000
607	GO:0030003	cellular cation homeostasis	10	1	0.57	1.00000
608	GO:0046474	glycerophospholipid biosynthetic process	36	1	2.06	1.00000
609	GO:0006220	pyrimidine nucleotide metabolic process	38	1	2.17	1.00000
610	GO:0006221	pyrimidine nucleotide biosynthetic proce...	31	1	1.77	1.00000
611	GO:0009250	glucan biosynthetic process	40	1	2.29	1.00000
612	GO:0050789	regulation of biological process	2389	133	136.58	1.00000
613	GO:0033036	macromolecule localization	527	58	30.13	1.00000
614	GO:0009311	oligosaccharide metabolic process	23	4	1.31	1.00000
615	GO:0009312	oligosaccharide biosynthetic process	14	2	0.8	1.00000
616	GO:0009259	ribonucleotide metabolic process	242	11	13.84	1.00000
617	GO:0043436	oxoacid metabolic process	613	49	35.05	1.00000
618	GO:0048878	chemical homeostasis	32	3	1.83	1.00000
619	GO:0072593	reactive oxygen species metabolic proces...	26	1	1.49	1.00000
620	GO:0006213	pyrimidine nucleoside metabolic process	20	1	1.14	1.00000
621	GO:0072594	establishment of protein localization to...	66	9	3.77	1.00000
622	GO:0019320	hexose catabolic process	4	1	0.23	1.00000
623	GO:0072599	establishment of protein localization to...	25	8	1.43	1.00000
624	GO:0071822	protein complex subunit organization	162	6	9.26	1.00000
625	GO:0008610	lipid biosynthetic process	149	12	8.52	1.00000
626	GO:0071824	protein-DNA complex subunit organization	29	1	1.66	1.00000
627	GO:0015849	organic acid transport	120	5	6.86	1.00000
628	GO:0002376	immune system process	13	3	0.74	1.00000
629	GO:0071826	ribonucleoprotein complex subunit organi...	46	1	2.63	1.00000
630	GO:0080090	regulation of primary metabolic process	795	45	45.45	1.00000
631	GO:0022411	cellular component disassembly	45	3	2.57	1.00000
632	GO:0016569	covalent chromatin modification	45	4	2.57	1.00000
633	GO:0015833	peptide transport	410	46	23.44	1.00000
634	GO:1901135	carbohydrate derivative metabolic proces...	622	37	35.56	1.00000
635	GO:1901136	carbohydrate derivative catabolic proces...	56	8	3.2	1.00000
636	GO:0050657	nucleic acid transport	17	2	0.97	1.00000
637	GO:0050658	RNA transport	17	2	0.97	1.00000
638	GO:0019318	hexose metabolic process	83	5	4.75	1.00000
639	GO:0019319	hexose biosynthetic process	20	3	1.14	1.00000
640	GO:0006575	cellular modified amino acid metabolic p...	56	5	3.2	1.00000
641	GO:0006576	cellular biogenic amine metabolic proces...	30	2	1.72	1.00000
642	GO:0009220	pyrimidine ribonucleotide biosynthetic p...	18	1	1.03	1.00000
643	GO:0030243	cellulose metabolic process	4	1	0.23	1.00000
644	GO:0071840	cellular component organization or bioge...	698	29	39.9	1.00000
645	GO:0072330	monocarboxylic acid biosynthetic process	30	3	1.72	1.00000
646	GO:0009225	nucleotide-sugar metabolic process	24	2	1.37	1.00000
647	GO:0009226	nucleotide-sugar biosynthetic process	20	2	1.14	1.00000
648	GO:0031163	metallo-sulfur cluster assembly	18	1	1.03	1.00000
649	GO:0036260	RNA capping	16	1	0.91	1.00000
650	GO:0071103	DNA conformation change	58	1	3.32	1.00000
651	GO:0046434	organophosphate catabolic process	66	5	3.77	1.00000
652	GO:0042451	purine nucleoside biosynthetic process	31	1	1.77	1.00000
653	GO:0010467	gene expression	2239	142	128	1.00000
654	GO:0006528	asparagine metabolic process	9	3	0.51	1.00000
655	GO:1901068	guanosine-containing compound metabolic ...	33	1	1.89	1.00000
656	GO:0010468	regulation of gene expression	813	44	46.48	1.00000
657	GO:0042455	ribonucleoside biosynthetic process	35	1	2	1.00000
658	GO:0018193	peptidyl-amino acid modification	95	3	5.43	1.00000
659	GO:0009218	pyrimidine ribonucleotide metabolic proc...	18	1	1.03	1.00000
660	GO:0016573	histone acetylation	18	1	1.03	1.00000
661	GO:1905039	carboxylic acid transmembrane transport	80	4	4.57	1.00000
662	GO:1902275	regulation of chromatin organization	5	1	0.29	1.00000
663	GO:0051252	regulation of RNA metabolic process	749	44	42.82	1.00000
664	GO:0043623	cellular protein complex assembly	98	2	5.6	1.00000
665	GO:0051254	positive regulation of RNA metabolic pro...	19	2	1.09	1.00000
666	GO:0043624	cellular protein complex disassembly	28	2	1.6	1.00000
667	GO:0019222	regulation of metabolic process	853	45	48.77	1.00000
668	GO:0033554	cellular response to stress	275	6	15.72	1.00000
669	GO:0009247	glycolipid biosynthetic process	32	1	1.83	1.00000
670	GO:0006497	protein lipidation	32	1	1.83	1.00000
671	GO:0046717	acid secretion	24	1	1.37	1.00000
672	GO:0006544	glycine metabolic process	20	4	1.14	1.00000
673	GO:0009308	amine metabolic process	35	2	2	1.00000
674	GO:0009309	amine biosynthetic process	19	2	1.09	1.00000
675	GO:0071363	cellular response to growth factor stimu...	17	1	0.97	1.00000
676	GO:0008150	biological_process	14763	844	844	1.00000
677	GO:0034470	ncRNA processing	196	7	11.21	1.00000
678	GO:1903506	regulation of nucleic acid-templated tra...	747	44	42.71	1.00000
679	GO:1903508	positive regulation of nucleic acid-temp...	19	2	1.09	1.00000
680	GO:0030490	maturation of SSU-rRNA	2	1	0.11	1.00000
681	GO:1903509	liposaccharide metabolic process	32	1	1.83	1.00000
682	GO:1901070	guanosine-containing compound biosynthet...	24	1	1.37	1.00000
683	GO:0019219	regulation of nucleobase-containing comp...	755	45	43.16	1.00000
684	GO:1901071	glucosamine-containing compound metaboli...	74	2	4.23	1.00000
685	GO:0051273	beta-glucan metabolic process	6	1	0.34	1.00000
686	GO:0051274	beta-glucan biosynthetic process	6	1	0.34	1.00000
687	GO:0030203	glycosaminoglycan metabolic process	38	7	2.17	1.00000
688	GO:0043647	inositol phosphate metabolic process	12	2	0.69	1.00000
689	GO:1901360	organic cyclic compound metabolic proces...	3565	155	203.81	1.00000
690	GO:0032011	ARF protein signal transduction	15	3	0.86	1.00000
691	GO:1901361	organic cyclic compound catabolic proces...	114	2	6.52	1.00000
692	GO:0022406	membrane docking	42	2	2.4	1.00000
693	GO:1901362	organic cyclic compound biosynthetic pro...	1395	67	79.75	1.00000
694	GO:0051336	regulation of hydrolase activity	48	2	2.74	1.00000
695	GO:0071804	cellular potassium ion transport	35	1	2	1.00000
696	GO:0031124	mRNA 3'-end processing	9	1	0.51	1.00000
697	GO:0070727	cellular macromolecule localization	346	38	19.78	1.00000
698	GO:0060255	regulation of macromolecule metabolic pr...	839	45	47.97	1.00000
699	GO:0072521	purine-containing compound metabolic pro...	278	11	15.89	1.00000
700	GO:0072522	purine-containing compound biosynthetic ...	167	2	9.55	1.00000
701	GO:0043632	modification-dependent macromolecule cat...	153	7	8.75	1.00000
702	GO:0072524	pyridine-containing compound metabolic p...	110	6	6.29	1.00000
703	GO:0072525	pyridine-containing compound biosyntheti...	25	1	1.43	1.00000
704	GO:0006461	protein complex assembly	135	3	7.72	1.00000
705	GO:1901292	nucleoside phosphate catabolic process	35	1	2	1.00000
706	GO:1901293	nucleoside phosphate biosynthetic proces...	249	4	14.24	1.00000
707	GO:0072527	pyrimidine-containing compound metabolic...	52	2	2.97	1.00000
708	GO:0072528	pyrimidine-containing compound biosynthe...	42	2	2.4	1.00000
709	GO:0036211	protein modification process	1466	79	83.81	1.00000
710	GO:0006790	sulfur compound metabolic process	112	7	6.4	1.00000
711	GO:0097354	prenylation	28	4	1.6	1.00000
712	GO:0072511	divalent inorganic cation transport	60	1	3.43	1.00000
713	GO:0006793	phosphorus metabolic process	1685	86	96.33	1.00000
714	GO:0009201	ribonucleoside triphosphate biosynthetic...	49	2	2.8	1.00000
715	GO:0006796	phosphate-containing compound metabolic ...	1676	86	95.82	1.00000
716	GO:0031099	regeneration	1	1	0.06	1.00000
717	GO:0009205	purine ribonucleoside triphosphate metab...	137	6	7.83	1.00000
718	GO:0009206	purine ribonucleoside triphosphate biosy...	47	2	2.69	1.00000
719	GO:0022610	biological adhesion	107	7	6.12	1.00000
720	GO:0009208	pyrimidine ribonucleoside triphosphate m...	16	1	0.91	1.00000
721	GO:0009209	pyrimidine ribonucleoside triphosphate b...	16	1	0.91	1.00000
722	GO:0022613	ribonucleoprotein complex biogenesis	120	7	6.86	1.00000
723	GO:0042773	ATP synthesis coupled electron transport	8	1	0.46	1.00000
724	GO:0006505	GPI anchor metabolic process	32	1	1.83	1.00000
725	GO:0042775	mitochondrial ATP synthesis coupled elec...	4	1	0.23	1.00000
726	GO:0022618	ribonucleoprotein complex assembly	34	1	1.94	1.00000
727	GO:0051246	regulation of protein metabolic process	48	1	2.74	1.00000
728	GO:0044106	cellular amine metabolic process	34	2	1.94	1.00000
729	GO:0032268	regulation of cellular protein metabolic...	45	1	2.57	1.00000
730	GO:0046700	heterocycle catabolic process	112	2	6.4	1.00000
731	GO:0034660	ncRNA metabolic process	417	36	23.84	1.00000
732	GO:0044085	cellular component biogenesis	321	13	18.35	1.00000
733	GO:0042723	thiamine-containing compound metabolic p...	7	1	0.4	1.00000
734	GO:0071310	cellular response to organic substance	55	1	3.14	1.00000
735	GO:0042724	thiamine-containing compound biosyntheti...	5	1	0.29	1.00000
736	GO:0050896	response to stimulus	1832	110	104.74	1.00000
737	GO:0043603	cellular amide metabolic process	819	71	46.82	1.00000
738	GO:0051234	establishment of localization	2616	188	149.56	1.00000
739	GO:0043604	amide biosynthetic process	779	65	44.54	1.00000
740	GO:0051235	maintenance of location	11	1	0.63	1.00000
741	GO:0051236	establishment of RNA localization	17	2	0.97	1.00000
742	GO:0006473	protein acetylation	24	1	1.37	1.00000
743	GO:0034728	nucleosome organization	15	1	0.86	1.00000
744	GO:0032259	methylation	108	3	6.17	1.00000
745	GO:0006475	internal protein amino acid acetylation	24	1	1.37	1.00000
746	GO:0006476	protein deacetylation	6	1	0.34	1.00000
747	GO:0043933	macromolecular complex subunit organizat...	237	8	13.55	1.00000
748	GO:0034654	nucleobase-containing compound biosynthe...	1242	65	71.01	1.00000
749	GO:0048285	organelle fission	32	1	1.83	1.00000
750	GO:0034655	nucleobase-containing compound catabolic...	93	2	5.32	1.00000
751	GO:0009790	embryo development	9	1	0.51	1.00000
752	GO:0006766	vitamin metabolic process	45	1	2.57	1.00000
753	GO:0016482	cytosolic transport	28	1	1.6	1.00000
754	GO:0006767	water-soluble vitamin metabolic process	45	1	2.57	1.00000
755	GO:0043170	macromolecule metabolic process	5825	325	333.01	1.00000
756	GO:0019538	protein metabolic process	3136	221	179.28	1.00000
757	GO:0009451	RNA modification	133	6	7.6	1.00000
758	GO:1902531	regulation of intracellular signal trans...	154	10	8.8	1.00000
759	GO:0043171	peptide catabolic process	18	3	1.03	1.00000
760	GO:0009452	7-methylguanosine RNA capping	16	1	0.91	1.00000
761	GO:0042743	hydrogen peroxide metabolic process	4	1	0.23	1.00000
762	GO:0046164	alcohol catabolic process	13	2	0.74	1.00000
763	GO:0042401	cellular biogenic amine biosynthetic pro...	19	2	1.09	1.00000
764	GO:0046165	alcohol biosynthetic process	16	3	0.91	1.00000
765	GO:0006753	nucleoside phosphate metabolic process	413	16	23.61	1.00000
766	GO:0006754	ATP biosynthetic process	33	1	1.89	1.00000
767	GO:0023051	regulation of signaling	190	12	10.86	1.00000
768	GO:0031399	regulation of protein modification proce...	24	1	1.37	1.00000
769	GO:0031056	regulation of histone modification	5	1	0.29	1.00000
770	GO:0006757	ATP generation from ADP	68	3	3.89	1.00000
771	GO:2001141	regulation of RNA biosynthetic process	747	44	42.71	1.00000
772	GO:0070646	protein modification by small protein re...	106	5	6.06	1.00000
773	GO:0070647	protein modification by small protein co...	151	7	8.63	1.00000
774	GO:0061919	process utilizing autophagic mechanism	25	2	1.43	1.00000
775	GO:0046942	carboxylic acid transport	120	5	6.86	1.00000
776	GO:0070972	protein localization to endoplasmic reti...	26	8	1.49	1.00000
777	GO:0072503	cellular divalent inorganic cation homeo...	3	1	0.17	1.00000
778	GO:0033500	carbohydrate homeostasis	7	2	0.4	1.00000
779	GO:0018130	heterocycle biosynthetic process	1388	67	79.35	1.00000
780	GO:0072507	divalent inorganic cation homeostasis	3	1	0.17	1.00000
781	GO:0044042	glucan metabolic process	41	1	2.34	1.00000
782	GO:0071554	cell wall organization or biogenesis	32	1	1.83	1.00000
783	GO:0071555	cell wall organization	21	1	1.2	1.00000
784	GO:0034622	cellular macromolecular complex assembly	161	4	9.2	1.00000
785	GO:0006772	thiamine metabolic process	7	1	0.4	1.00000
786	GO:0022607	cellular component assembly	230	7	13.15	1.00000
787	GO:0007167	enzyme linked receptor protein signaling...	38	3	2.17	1.00000
788	GO:1901564	organonitrogen compound metabolic proces...	4026	268	230.17	1.00000
789	GO:1901565	organonitrogen compound catabolic proces...	292	21	16.69	1.00000
790	GO:0099131	ATP hydrolysis coupled ion transmembrane...	45	2	2.57	1.00000
791	GO:1901566	organonitrogen compound biosynthetic pro...	1325	80	75.75	1.00000
792	GO:0099132	ATP hydrolysis coupled cation transmembr...	45	2	2.57	1.00000
793	GO:0008104	protein localization	412	47	23.55	1.00000
794	GO:0046939	nucleotide phosphorylation	82	4	4.69	1.00000
795	GO:0048583	regulation of response to stimulus	196	12	11.21	1.00000
796	GO:0010628	positive regulation of gene expression	26	2	1.49	1.00000
797	GO:0006661	phosphatidylinositol biosynthetic proces...	32	1	1.83	1.00000
798	GO:1903963	arachidonate transport	24	1	1.37	1.00000
799	GO:0046173	polyol biosynthetic process	15	3	0.86	1.00000
800	GO:0034613	cellular protein localization	346	38	19.78	1.00000
801	GO:0007154	cell communication	1433	84	81.92	1.00000
802	GO:0006664	glycolipid metabolic process	32	1	1.83	1.00000
803	GO:0006720	isoprenoid metabolic process	41	6	2.34	1.00000
804	GO:0046174	polyol catabolic process	13	2	0.74	1.00000
805	GO:0044260	cellular macromolecule metabolic process	4914	238	280.93	1.00000
806	GO:0048589	developmental growth	1	1	0.06	1.00000
807	GO:0044262	cellular carbohydrate metabolic process	123	12	7.03	1.00000
808	GO:0007600	sensory perception	92	2	5.26	1.00000
809	GO:0044264	cellular polysaccharide metabolic proces...	41	1	2.34	1.00000
810	GO:0006725	cellular aromatic compound metabolic pro...	3525	155	201.52	1.00000
811	GO:0044265	cellular macromolecule catabolic process	238	8	13.61	1.00000
812	GO:0044267	cellular protein metabolic process	2312	142	132.18	1.00000
813	GO:0007606	sensory perception of chemical stimulus	84	2	4.8	1.00000
814	GO:0018393	internal peptidyl-lysine acetylation	24	1	1.37	1.00000
815	GO:0018394	peptidyl-lysine acetylation	24	1	1.37	1.00000
816	GO:0006650	glycerophospholipid metabolic process	109	6	6.23	1.00000
817	GO:0034641	cellular nitrogen compound metabolic pro...	4129	195	236.05	1.00000
818	GO:0032309	icosanoid secretion	24	1	1.37	1.00000
819	GO:0006996	organelle organization	388	12	22.18	1.00000
820	GO:0034645	cellular macromolecule biosynthetic proc...	2063	134	117.94	1.00000
821	GO:0050877	nervous system process	92	2	5.26	1.00000
822	GO:0007187	G-protein coupled receptor signaling pat...	2	1	0.11	1.00000
823	GO:0000002	mitochondrial genome maintenance	2	0	0.11	1.00000
824	GO:0000003	reproduction	18	0	1.03	1.00000
825	GO:0000027	ribosomal large subunit assembly	1	0	0.06	1.00000
826	GO:0000070	mitotic sister chromatid segregation	16	0	0.91	1.00000
827	GO:0000075	cell cycle checkpoint	17	0	0.97	1.00000
828	GO:0000077	DNA damage checkpoint	12	0	0.69	1.00000
829	GO:0000079	regulation of cyclin-dependent protein s...	8	0	0.46	1.00000
830	GO:0000096	sulfur amino acid metabolic process	23	0	1.31	1.00000
831	GO:0000097	sulfur amino acid biosynthetic process	16	0	0.91	1.00000
832	GO:0000098	sulfur amino acid catabolic process	3	0	0.17	1.00000
833	GO:0000103	sulfate assimilation	4	0	0.23	1.00000
834	GO:0000105	histidine biosynthetic process	9	0	0.51	1.00000
835	GO:0000122	negative regulation of transcription fro...	2	0	0.11	1.00000
836	GO:0000154	rRNA modification	9	0	0.51	1.00000
837	GO:0000165	MAPK cascade	2	0	0.11	1.00000
838	GO:0000184	nuclear-transcribed mRNA catabolic proce...	18	0	1.03	1.00000
839	GO:0000255	allantoin metabolic process	2	0	0.11	1.00000
840	GO:0000256	allantoin catabolic process	2	0	0.11	1.00000
841	GO:0000278	mitotic cell cycle	43	0	2.46	1.00000
842	GO:0000280	nuclear division	26	0	1.49	1.00000
843	GO:0000288	nuclear-transcribed mRNA catabolic proce...	7	0	0.4	1.00000
844	GO:0000289	nuclear-transcribed mRNA poly(A) tail sh...	3	0	0.17	1.00000
