# Supplementary material for: Immune challenge reduces gut microbial diversity and triggers fertility-dependent gene expression changes in a social insect
Source: BMC Genomics. 2020 Nov 23;21:816. doi: 10.1186/s12864-020-07191-9 (PMC7682046; doi:10.1186/s12864-020-07191-9)
Supplement: Supplementary file 1 — Additional file 1. Additional methodological details, Figures S1 and S2 and Table S2. Description of additional supplementary tables (Tables S1, S3-S18) are also provided. [file 12864_2020_7191_MOESM1_ESM.zip › Table_S15.xlsx]

## Sheet: a)
Contig	Annotation	baseMean	log2FoldChange	lfcSE	stat	pvalue	padj
Contig4144	ref|XP_011687523.1| PREDICTED: COP9 signalosome complex subunit 5 isoform X2 [Wasmannia auropunctata]	461.644780047277	0.210795294558524	0.0671190669859489	3.1406171751859	0.00168592250205125	0.0253334841211277
Contig111245	ref|XP_011694519.1| PREDICTED: protein kinase 4 isoform X1 [Wasmannia auropunctata]	374.379587058514	0.217030092750169	0.0656581093943136	3.30545753985669	0.000948214698399034	0.0159088442544459
Contig19884	ref|XP_012525020.1| PREDICTED: 40S ribosomal protein S13 [Monomorium pharaonis]	605.85012225792	0.235194547892665	0.0795913437850851	2.9550267241089	0.00312641968289171	0.0415306375625112
Contig28807	ref|XP_011871517.1| PREDICTED: ufm1-specific protease 2 [Vollenhovia emeryi]	411.933060865817	0.237007982086475	0.0794643715863095	2.98256913576735	0.00285840081960384	0.0386518265778995
Contig116280	ref|XP_011862852.1| PREDICTED: zinc transporter 1 isoform X2 [Vollenhovia emeryi]	345.651707583297	0.24697891453282	0.0847236978635234	2.91511018476394	0.00355562985032475	0.0459713210527162
Contig5553	ref|XP_011873835.1| PREDICTED: ATP-dependent zinc metalloprotease YME1 homolog isoform X1 [Vollenhovia emeryi]	645.810671873881	0.247836986446901	0.0829789464606218	2.98674539769571	0.00281964438701496	0.0382230361755945
Contig85040	ref|XP_011707513.1| PREDICTED: 60S ribosomal protein L3 [Wasmannia auropunctata]	1279.621967634	0.248099642671421	0.0705375812651825	3.51726892560581	0.000436011794527619	0.00845530525450505
Contig494	ref|XP_012530245.1| PREDICTED: signal recognition particle 54 kDa protein [Monomorium pharaonis]	595.562829240954	0.26573013162322	0.0885419687548902	3.00117712944511	0.00268938074822854	0.0367584842562251
Contig17813	ref|XP_011703823.1| PREDICTED: mitochondrial ribonuclease P protein 1 homolog [Wasmannia auropunctata]	302.524225334683	0.265856789735699	0.0842832447623269	3.15432551849893	0.00160869540670097	0.0243728766489046
Contig9078	ref|XP_011156616.1| PREDICTED: protein bicaudal D isoform X1 [Solenopsis invicta]	765.632585797057	0.270995967075953	0.0855773571635385	3.16667838384024	0.00154190744620166	0.0235398217279288
Contig4988	ref|XP_012062918.1| PREDICTED: nuclear autoantigenic sperm protein [Atta cephalotes]	615.30299111785	0.276043166723932	0.0896254231609288	3.07996500310272	0.00207024919656735	0.0298104453751629
Contig113594	ref|XP_012061094.1| PREDICTED: hippocampus abundant transcript 1 protein-like isoform X3 [Atta cephalotes]	324.411341574302	0.276044227497502	0.0943211419647588	2.92664212654083	0.00342642907000409	0.0446199108795405
Contig21588	ref|XP_012054688.1| PREDICTED: catenin alpha [Atta cephalotes]	611.821944836003	0.276649998784458	0.0875534866481318	3.15978277251579	0.00157886806884961	0.0240067960857687
Contig8169	ref|XP_011869333.1| PREDICTED: pre-mRNA-splicing factor 38B isoform X3 [Vollenhovia emeryi]	250.785624832117	0.277442732635912	0.0924819548548463	2.99996613470561	0.00270009625021106	0.0368900718190735
Contig52953	#N/A	141.93259480421	0.280095105118412	0.0953062088565906	2.93889672539464	0.00329382808338042	0.0432754506587437
Contig79592	ref|XP_011693688.1| PREDICTED: uncharacterized protein LOC105453425 [Wasmannia auropunctata]	267.943896848544	0.280558196670038	0.0964049355300226	2.91020573923485	0.00361190906450404	0.0465215534118768
Contig21358	ref|XP_011876553.1| PREDICTED: uncharacterized protein CG4449 isoform X2 [Vollenhovia emeryi]	1381.74656932245	0.281870279968408	0.0750131761198433	3.75761025660456	0.000171543789057835	0.00393433779964302
Contig46987	ref|XP_012526296.1| PREDICTED: DNA-directed RNA polymerase II subunit RPB3 [Monomorium pharaonis]	183.232811484231	0.282447443053698	0.0969957557652983	2.91195672248937	0.00359172395045027	0.0463407907731294
Contig56429	ref|XP_012063733.1| PREDICTED: vacuolar-sorting protein SNF8 [Atta cephalotes]	119.994200128201	0.289594869914233	0.0924806117041032	3.13141170433439	0.0017396808949412	0.025957210351695
Contig26010	ref|XP_011879959.1| PREDICTED: membrane-bound transcription factor site-1 protease [Vollenhovia emeryi]	548.577719483179	0.291423802020795	0.0846900710401303	3.44106219822043	0.000579435320771408	0.0106664234547433
Contig1733	ref|XP_012540805.1| PREDICTED: uncharacterized protein LOC105839205 [Monomorium pharaonis]	642.013494681138	0.29323565175577	0.0865490874953178	3.38808484574299	0.000703824885555105	0.0124899905822651
Contig6253	ref|XP_011634275.1| PREDICTED: disks large 1 tumor suppressor protein isoform X5 [Pogonomyrmex barbatus]	381.836215037083	0.293871910110816	0.0919468262123188	3.19610716559397	0.00139295364355895	0.0216608204813213
Contig59062	ref|XP_011705412.1| PREDICTED: aspartate--tRNA ligase, cytoplasmic [Wasmannia auropunctata]	792.141018382311	0.298686127982702	0.102681701460126	2.90885448658727	0.00362755660588908	0.0466964842478444
Contig107630	#N/A	116.214054221385	0.301111168085074	0.10301083043873	2.92310203502507	0.00346562928006838	0.0450179932171641
Contig27405	ref|XP_011867531.1| PREDICTED: transducin beta-like protein 2 [Vollenhovia emeryi]	711.81585423157	0.302934332896836	0.0872635060861831	3.47148936002701	0.000517579842342598	0.00973929134722479
Contig41557	ref|XP_011640416.1| PREDICTED: triple functional domain protein isoform X5 [Pogonomyrmex barbatus]	350.304372929998	0.303680255145718	0.0939304139638356	3.23303435309716	0.00122482832920472	0.0195854108049486
Contig43582	ref|XP_011876237.1| PREDICTED: 40S ribosomal protein S3-like [Vollenhovia emeryi]	802.526289592739	0.303976284345039	0.101881021669634	2.9836399298265	0.00284841757187102	0.0385552750366022
Contig132338	ref|XP_011645941.1| PREDICTED: 60S ribosomal protein L10a [Pogonomyrmex barbatus]	392.530357155636	0.30458112362234	0.0928262554128525	3.28119584559013	0.0010336794286407	0.0170682335365494
Contig105206	ref|XP_011880063.1| PREDICTED: SH3 domain-binding protein 5 homolog [Vollenhovia emeryi]	339.727403344652	0.30648949394065	0.0842894379720985	3.63615538689561	0.000276737437462379	0.00583491562587241
Contig3907	ref|XP_011865497.1| PREDICTED: sex determination protein fruitless-like [Vollenhovia emeryi]	356.628448704625	0.307332810787714	0.0965657925562227	3.18262608996636	0.00145945953476705	0.0225040529105059
Contig109603	ref|XP_011877044.1| PREDICTED: telomere-associated protein RIF1-like isoform X1 [Vollenhovia emeryi]	214.497644380385	0.309024950930602	0.0972673267200029	3.17706840880054	0.0014877193927731	0.022861821839267
Contig132339	ref|XP_011704806.1| PREDICTED: 60S ribosomal protein L10a-like [Wasmannia auropunctata]	440.064441404196	0.310555059590227	0.104295055757292	2.97765850293928	0.00290459415239691	0.0391554305549855
Contig88257	ref|XP_011066029.1| PREDICTED: sentrin-specific protease 8-like [Acromyrmex echinatior]	190.882596543187	0.312173687737246	0.0894187890799923	3.49114197305872	0.000480960602415248	0.00917627900055451
Contig18450	ref|XP_012534239.1| PREDICTED: armadillo segment polarity protein isoform X2 [Monomorium pharaonis]	831.853324083377	0.314536920024388	0.0940625510099226	3.3439122865295	0.000826058504247834	0.0142254092692147
Contig12525	ref|XP_011058274.1| PREDICTED: ras-related protein Rab-7a [Acromyrmex echinatior]	306.263952354136	0.315283421668659	0.108483927814267	2.90626849544432	0.00365767445370182	0.0469905137707767
Contig6080	ref|XP_011707889.1| PREDICTED: telomere length regulation protein TEL2 homolog [Wasmannia auropunctata]	625.187016409215	0.315636832357435	0.104842783009565	3.01057281480822	0.00260755418800142	0.0358387406153466
Contig40899	ref|XP_012060514.1| PREDICTED: protein max [Atta cephalotes]	414.287061545492	0.316213262741228	0.109151326733334	2.8970171248011	0.00376729190672421	0.0481116418343062
Contig1952	ref|XP_011871114.1| PREDICTED: guanine nucleotide-binding protein G(i) subunit alpha isoform X1 [Vollenhovia emeryi]	594.450253717628	0.318528999822267	0.104309578895136	3.05368886727546	0.0022604638393462	0.0320473530339835
Contig42755	ref|XP_011172317.1| PREDICTED: translation elongation factor 2 [Solenopsis invicta]	389.440472592848	0.319555924808199	0.103724602892645	3.08081126267544	0.00206437458752322	0.0297303898388615
Contig12629	ref|XP_012539045.1| PREDICTED: ras-related protein Rab6 isoform X1 [Monomorium pharaonis]	725.008951093796	0.320236138126674	0.103256367671905	3.10136939103087	0.00192627828768315	0.0280802218322974
Contig74076	ref|XP_011872958.1| PREDICTED: HEAT repeat-containing protein 6 [Vollenhovia emeryi]	229.172377413229	0.322017475027375	0.0897797758109232	3.58674848671426	0.000334826992457721	0.00680461977448844
Contig77488	ref|XP_012528381.1| PREDICTED: transcription factor 25 [Monomorium pharaonis]	508.206095638101	0.322599378044912	0.107292830672863	3.00671886482818	0.00264083871405534	0.036211799936087
Contig83150	ref|XP_011641921.1| PREDICTED: transcriptional protein SWT1 isoform X2 [Pogonomyrmex barbatus]	163.546981833416	0.322964827030559	0.103839732086552	3.11022400136166	0.00186945513406919	0.0274584954566944
Contig112050	ref|XP_011876922.1| PREDICTED: thyroid receptor-interacting protein 11-like [Vollenhovia emeryi]	563.265653263512	0.323022568899707	0.11130081569852	2.90224799227597	0.00370495117486188	0.0474674774329446
Contig110249	ref|XP_012525542.1| PREDICTED: RNA-binding protein lark isoform X4 [Monomorium pharaonis]	261.570107761159	0.324963751512019	0.0877218388118137	3.70447947641808	0.000211825256616315	0.00468593602586058
Contig49397	ref|XP_011636077.1| PREDICTED: tumor susceptibility gene 101 protein [Pogonomyrmex barbatus]	320.780960512606	0.32719877200846	0.109759854179474	2.98104233514597	0.00287269076855621	0.0387986341885252
Contig17869	#N/A	192.202157657481	0.327377585846975	0.0843238207057923	3.88238558341898	0.000103436689581543	0.00258094999464791
Contig87991	ref|XP_012063714.1| PREDICTED: coiled-coil domain-containing protein 47 [Atta cephalotes]	589.410557984829	0.329571737564737	0.0945277397455289	3.48650817687964	0.000489370423173638	0.00930922718028752
Contig22323	ref|XP_011871704.1| PREDICTED: protein suppressor of sable isoform X5 [Vollenhovia emeryi]	192.052588855325	0.333900055644172	0.107023853051747	3.11986576938813	0.00180933469807349	0.0267872397101025
Contig10349	ref|XP_011058541.1| PREDICTED: uncharacterized protein LOC105148476 [Acromyrmex echinatior]	176.566540405454	0.334653785692924	0.10171746271582	3.29003277075329	0.00100175715208416	0.0166424469463115
Contig73802	ref|XP_012063616.1| PREDICTED: probable ATP-dependent RNA helicase DDX5 [Atta cephalotes]	480.399041759534	0.335375986442712	0.105430982303882	3.18100030099372	0.00146767477131156	0.0226101609038562
Contig148840	ref|XP_011701808.1| PREDICTED: protein FRG1 homolog [Wasmannia auropunctata]	193.290522722986	0.339436088804498	0.100331316244416	3.38315195604134	0.000716589712818356	0.0126684392274995
Contig69491	ref|XP_011865775.1| PREDICTED: NSFL1 cofactor p47 isoform X2 [Vollenhovia emeryi]	125.788115833321	0.342988724680615	0.111918213351786	3.06463724186266	0.00217934158089984	0.0310844197397018
Contig27374	ref|XP_011687702.1| PREDICTED: DNA repair protein XRCC1 [Wasmannia auropunctata]	2155.6241132121	0.344036059934645	0.087931212620368	3.91255902974951	9.13232052875592e-05	0.00232249050263041
Contig118202	ref|XP_012530149.1| PREDICTED: ras-related protein Rab-1A [Monomorium pharaonis]	207.899540749437	0.344803461670435	0.108411162100412	3.18051624011809	0.00147012898844402	0.0226453967104552
Contig6412	ref|XP_011687385.1| PREDICTED: lysine-specific demethylase lid isoform X1 [Wasmannia auropunctata]	541.727280491236	0.345906185912188	0.102112847936234	3.38748936008712	0.000705354530086189	0.0125105871361638
Contig2694	ref|XP_014474232.1| PREDICTED: heterogeneous nuclear ribonucleoprotein 27C-like isoform X5 [Dinoponera quadriceps]	257.398454298045	0.346837212299668	0.114006424951575	3.04226022741252	0.00234808802883959	0.0330393867963324
Contig24669	ref|XP_011706398.1| PREDICTED: cyclin-K [Wasmannia auropunctata]	71.5427894178622	0.34874828345099	0.116259416077058	2.99974225932665	0.00270208148187679	0.0369060406972746
Contig80680	ref|XP_011172025.1| PREDICTED: uncharacterized protein LOC105204589 isoform X1 [Solenopsis invicta]	265.618886266383	0.349424916339763	0.112957019187786	3.0934325184242	0.00197855544249721	0.0287280318821003
Contig14382	ref|XP_011867508.1| PREDICTED: mRNA-capping enzyme [Vollenhovia emeryi]	205.249675703817	0.352021140378416	0.111435990780375	3.15895374477533	0.00158336618477032	0.0240590052416182
Contig18922	ref|XP_011876787.1| PREDICTED: phosphatidylinositol N-acetylglucosaminyltransferase subunit C [Vollenhovia emeryi]	331.671884062744	0.353096747073447	0.0951046192303155	3.71271921312623	0.000205044329433493	0.00456374227667712
Contig38437	ref|XP_011157502.1| PREDICTED: protein lava lamp-like isoform X3 [Solenopsis invicta]	666.900257344053	0.355109738680433	0.121326191593621	2.92690089432514	0.00342357956867942	0.0445999346423527
Contig86460	ref|XP_011881305.1| PREDICTED: DNA-binding protein Ets97D isoform X1 [Vollenhovia emeryi]	127.374229711967	0.35709072464375	0.120926078153862	2.95296705305699	0.00314735552805814	0.0417474053777462
Contig1512	ref|XP_012054857.1| PREDICTED: coatomer subunit beta [Atta cephalotes]	758.906314095558	0.357804437415249	0.12161022119678	2.94222339120884	0.00325864760738244	0.0428838657571628
Contig4742	ref|XP_011862647.1| PREDICTED: palmitoyltransferase ZDHHC22-like [Vollenhovia emeryi]	532.303921244482	0.361587412128458	0.117261796463502	3.08359093100713	0.00204518598512715	0.0295247873309595
Contig64003	ref|XP_008556189.1| PREDICTED: ADP,ATP carrier protein 2 [Microplitis demolitor]	142.299824579385	0.364466685267007	0.118522103155025	3.07509464956329	0.0021043576042202	0.0302149658166986
Contig145045	ref|XP_015435820.1| PREDICTED: calcium release-activated calcium channel protein 1 isoform X2 [Dufourea novaeangliae]	191.546728353067	0.364804038508652	0.125550235949151	2.90564199860525	0.00366500510634494	0.0470545573460194
Contig146807	ref|XP_011698282.1| PREDICTED: RING finger and CHY zinc finger domain-containing protein 1 [Wasmannia auropunctata]	379.60627822282	0.365064305866123	0.122037530758943	2.99141013093113	0.00277692260839698	0.0377306464898455
Contig4175	ref|XP_011647808.1| PREDICTED: INO80 complex subunit D [Pogonomyrmex barbatus]	174.477496848975	0.366378218176172	0.109292786643865	3.35226348807474	0.000801536943271231	0.0138948780550664
Contig91894	ref|XP_012286198.1| PREDICTED: pre-mRNA-splicing factor RBM22 [Orussus abietinus]	107.440223086165	0.366948930498912	0.112540835152222	3.26058474688391	0.00111182736332134	0.0181246097757189
Contig12361	ref|XP_011051698.1| PREDICTED: geranylgeranyl transferase type-2 subunit alpha isoform X1 [Acromyrmex echinatior]	246.45775766384	0.368902987965264	0.12706333087909	2.90330015286867	0.0036925255437053	0.0473440634474852
Contig6771	ref|XP_012522739.1| PREDICTED: OTU domain-containing protein 7B-like [Monomorium pharaonis]	975.939815967442	0.369279065887432	0.118248510613377	3.12290669854456	0.00179074505881265	0.0265787567479281
Contig41628	ref|XP_011057279.1| PREDICTED: LOW QUALITY PROTEIN: uncharacterized protein LOC105147752 [Acromyrmex echinatior]	346.298293397677	0.372459654176238	0.106963936694176	3.48210495693655	0.000497488659086695	0.00943718380380236
Contig25325	ref|XP_011688503.1| PREDICTED: nucleosome assembly protein 1-like 1 isoform X3 [Wasmannia auropunctata]	367.350604317292	0.372607546178466	0.118792708045802	3.13661968236975	0.00170907665986183	0.0255984638739724
Contig771	#N/A	530.312613570973	0.375811000540088	0.123026782095948	3.05470885393877	0.00225279098646599	0.0319537701954396
Contig109826	ref|XP_011638221.1| PREDICTED: ADP,ATP carrier protein 2 [Pogonomyrmex barbatus]	487.053969674184	0.376352664126436	0.117979295483466	3.18998907888188	0.00142278170266732	0.0220563692073075
Contig51981	#N/A	365.090722310711	0.37796871976983	0.122453664821053	3.08662644210913	0.00202441827867823	0.0292810857982796
Contig116569	ref|XP_011629751.1| PREDICTED: E3 ubiquitin-protein ligase KCMF1-like [Pogonomyrmex barbatus]	310.910183225647	0.380019385302005	0.127997904395693	2.96895005505099	0.00298819161012512	0.0400440313330629
Contig23388	ref|XP_011861485.1| PREDICTED: tumor necrosis factor alpha-induced protein 8-like protein isoform X1 [Vollenhovia emeryi]	620.633082934702	0.380082686781706	0.120549102724071	3.15292837684317	0.00161641461391642	0.0244652289566587
Contig5166	ref|XP_012057365.1| PREDICTED: 40S ribosomal protein S19a-like isoform X2 [Atta cephalotes]	587.19965085327	0.380086489216866	0.109127373191808	3.48296195628943	0.000495898830007371	0.00941229166306783
Contig15675	ref|XP_011881603.1| PREDICTED: coronin-6 [Vollenhovia emeryi]	189.136774406771	0.380368855084043	0.115399376032806	3.29610842068946	0.000980341735535766	0.0163567992277248
Contig16964	ref|XP_011648180.1| PREDICTED: T-complex protein 1 subunit epsilon [Pogonomyrmex barbatus]	420.675017228188	0.381704324271807	0.113431916171433	3.36505224592104	0.000765291664152635	0.0133622072540743
Contig109824	ref|XP_011059688.1| PREDICTED: ADP,ATP carrier protein 2 [Acromyrmex echinatior]	231.938771269317	0.381878202822159	0.119095826432728	3.20647846579128	0.00134370361615395	0.0210933004052671
Contig24336	ref|XP_011862999.1| PREDICTED: UHRF1-binding protein 1-like isoform X2 [Vollenhovia emeryi]	216.907228676976	0.382918317317314	0.0959504263161948	3.99079328793648	6.58526584649165e-05	0.00175659764458324
Contig7477	ref|XP_011689108.1| PREDICTED: CCAAT/enhancer-binding protein zeta [Wasmannia auropunctata]	264.122331740149	0.383869717723698	0.12978677131622	2.95769525530777	0.0030994838014484	0.0412415027717449
Contig23200	ref|XP_011702031.1| PREDICTED: basic salivary proline-rich protein 1-like [Wasmannia auropunctata]	118.7621742654	0.38414525057678	0.128684812438193	2.98516385343674	0.00283426458486668	0.0383943619430737
Contig36198	#N/A	133.322263723538	0.384702128490921	0.127592320647152	3.01508842020978	0.00256904349710112	0.0354387412080024
Contig28005	ref|XP_011707513.1| PREDICTED: 60S ribosomal protein L3 [Wasmannia auropunctata]	668.357040384578	0.387789058991787	0.0901089420635344	4.3035580055791	1.68076816472131e-05	0.000559763491872585
Contig440	#N/A	222.849611935112	0.38827614981102	0.122383840186023	3.17260962902326	0.00151075509275285	0.0231502306382581
Contig24553	ref|XP_014605064.1| PREDICTED: eukaryotic translation initiation factor 2 subunit 1 [Polistes canadensis]	125.821595146085	0.388624282879305	0.105648852622404	3.67845246997878	0.000234653407868891	0.00509482664981296
Contig5201	ref|XP_012522306.1| PREDICTED: Krueppel homolog 2 [Monomorium pharaonis]	1620.17936535422	0.390141016388982	0.102623923232344	3.80165758724397	0.000143731275079024	0.00340411685968682
Contig116734	ref|XP_011871902.1| PREDICTED: uncharacterized protein LOC105564262 isoform X1 [Vollenhovia emeryi]	227.791639437914	0.390183356820578	0.117001617151316	3.33485439193513	0.000853440748806858	0.014609759367419
Contig86525	ref|XP_011871920.1| PREDICTED: serine/threonine-protein kinase 3 isoform X1 [Vollenhovia emeryi]	510.100575164853	0.390991664043437	0.0973141375626249	4.01783002795273	5.87365391308097e-05	0.00159789308278548
Contig84998	ref|XP_012533533.1| PREDICTED: ATPase family AAA domain-containing protein 1-like [Monomorium pharaonis]	1013.16290556716	0.394418428630283	0.132610171929071	2.97426979312903	0.00293686730326896	0.039492347294548
Contig98738	ref|XP_011629470.1| PREDICTED: protein MCM10 homolog [Pogonomyrmex barbatus]	335.919535218123	0.394550837192492	0.105464532126949	3.74107606828014	0.000183234046973105	0.00415377424084219
Contig84576	ref|XP_011166005.1| PREDICTED: protein fem-1 homolog A isoform X2 [Solenopsis invicta]	216.958428742403	0.394891727472127	0.126632534669414	3.11840656512981	0.00181831784936798	0.0268908786067818
Contig20571	ref|XP_011639649.1| PREDICTED: L-aminoadipate-semialdehyde dehydrogenase-phosphopantetheinyl transferase [Pogonomyrmex barbatus]	231.248822886579	0.39710434328832	0.121593893823125	3.26582471210243	0.00109145789208355	0.0178570359002314
Contig10096	ref|XP_011869002.1| PREDICTED: conserved oligomeric Golgi complex subunit 5 [Vollenhovia emeryi]	252.86673214793	0.397115108200044	0.117041813220361	3.39293366424848	0.000691483814969225	0.0123106048381258
Contig21239	ref|XP_011864416.1| PREDICTED: coiled-coil domain-containing protein 149 [Vollenhovia emeryi]	176.952788774591	0.39800763629801	0.120045961608139	3.31546043670514	0.000914922908214854	0.0154535253798293
Contig105848	ref|XP_012534214.1| PREDICTED: eukaryotic translation initiation factor 3 subunit B [Monomorium pharaonis]	207.317740697062	0.400749028508117	0.106224482147636	3.77266163511286	0.000161515264044962	0.00374807170058067
Contig1046	ref|XP_011692505.1| PREDICTED: uncharacterized protein LOC105452787 [Wasmannia auropunctata]	161.856446615979	0.401707397791123	0.120727136548677	3.32739936749147	0.00087660644076623	0.0149253114699399
Contig98600	ref|XP_011169133.1| PREDICTED: cysteine protease ATG4D [Solenopsis invicta]	75.9885283000228	0.402546493911275	0.123605011777935	3.25671660170607	0.00112708900994292	0.0183228301359865
Contig16537	ref|XP_011049103.1| PREDICTED: histone-lysine N-methyltransferase NSD2 isoform X1 [Acromyrmex echinatior]	407.870614727637	0.402978391627792	0.118616039367158	3.39733474307328	0.000680456735802565	0.012159633649905
Contig132738	ref|XP_011059902.1| PREDICTED: homocysteine-responsive endoplasmic reticulum-resident ubiquitin-like domain member 2 protein [Acromyrmex echinatior]	1502.64891094507	0.403111290955731	0.119921984691441	3.36144612677097	0.00077535480306508	0.0135205048557114
Contig9489	ref|XP_011636670.1| PREDICTED: myosin-11 [Pogonomyrmex barbatus]	411.710388984142	0.404482190122468	0.109146270807353	3.70587274425889	0.000210664058995697	0.00466661151529606
Contig111217	ref|XP_011648022.1| PREDICTED: cytoskeleton-associated protein 5 isoform X2 [Pogonomyrmex barbatus]	602.30133699169	0.405314908344032	0.133092803132244	3.04535556247396	0.00232405377312115	0.0327623938033317
Contig24506	ref|XP_011864075.1| PREDICTED: uncharacterized protein LOC105559986 [Vollenhovia emeryi]	368.745815562248	0.406322645375964	0.107975019678329	3.76311712270534	0.000167808561709962	0.0038687951090377
Contig8424	#N/A	118.155060516888	0.409213383770043	0.139405505421461	2.93541766900008	0.00333098993266909	0.043657955806416
Contig814	ref|XP_011704468.1| PREDICTED: phosphatidylinositol 4-kinase type 2-alpha isoform X2 [Wasmannia auropunctata]	226.979127586195	0.409848455801922	0.140538164964119	2.91627869131891	0.00354233929296933	0.0458694548722184
Contig84130	ref|XP_011873189.1| PREDICTED: T-complex protein 1 subunit epsilon [Vollenhovia emeryi]	524.934283739651	0.40994797618825	0.109510609335979	3.74345443490801	0.000181507529521224	0.0041217284173629
Contig32121	#N/A	77.0758618958839	0.412623418978035	0.130303376939088	3.16663641933794	0.00154212994650281	0.0235405685012418
Contig8283	ref|XP_012056772.1| PREDICTED: protein tyrosine phosphatase type IVA 1 [Atta cephalotes]	1951.72149258075	0.4129349332549	0.139381006781067	2.96263416939956	0.00305018845217427	0.0407013929699067
Contig18748	ref|XP_012060692.1| PREDICTED: eukaryotic translation initiation factor 2 subunit 3 [Atta cephalotes]	163.292416144248	0.412937673889218	0.139092726241258	2.96879416377944	0.00298970790024558	0.0400519852992101
Contig27259	#N/A	156.333506867754	0.413736980031731	0.10663005406871	3.88011601086808	0.000104406654455893	0.00260227973486152
Contig115383	ref|XP_012063569.1| PREDICTED: 60S ribosomal protein L3 [Atta cephalotes]	255.663130944781	0.414212025887879	0.111715667796735	3.70773441234341	0.000209121809152304	0.00464095691604178
Contig123597	#N/A	244.12501926592	0.415347312871701	0.111944513797526	3.71029627787691	0.000207016829676536	0.00460160307158723
Contig135692	ref|XP_012058172.1| PREDICTED: CSC1-like protein 2 [Atta cephalotes]	275.792750774964	0.417987176910136	0.115342071747662	3.62389170384058	0.000290203155632612	0.0060579502192638
Contig49478	ref|XP_011686363.1| PREDICTED: cyclic AMP-dependent transcription factor ATF-6 alpha [Wasmannia auropunctata]	261.967030923704	0.418864789955826	0.130863645245609	3.20077275220087	0.0013705958093111	0.0214138225903129
Contig10119	ref|XP_011883187.1| PREDICTED: kelch domain-containing protein 10 homolog [Vollenhovia emeryi]	474.253245947364	0.418894227794287	0.142262492176794	2.94451630492818	0.00323459902743052	0.0426543088784484
Contig52981	ref|XP_011052355.1| PREDICTED: WD repeat-containing protein 20 isoform X1 [Acromyrmex echinatior]	171.930400283764	0.419018144232455	0.133422053051122	3.14054636883682	0.00168633010179302	0.0253368015094792
Contig14676	#N/A	850.781105058921	0.419041052129524	0.114026815902516	3.67493425833946	0.000237910667177444	0.00515235024251068
Contig66528	ref|XP_012534486.1| PREDICTED: heterogeneous nuclear ribonucleoprotein A1, A2/B1 homolog isoform X2 [Monomorium pharaonis]	578.06723346	0.419246220294639	0.111582129997681	3.75728819931428	0.000171764638471364	0.00393807095209731
Contig121001	ref|XP_011873189.1| PREDICTED: T-complex protein 1 subunit epsilon [Vollenhovia emeryi]	110.838973678683	0.420098621362358	0.128944765188637	3.25797344892431	0.0011221090461059	0.0182634892129581
Contig91895	ref|XP_011049311.1| PREDICTED: LOW QUALITY PROTEIN: pre-mRNA-splicing factor RBM22 [Acromyrmex echinatior]	136.126985982762	0.421468394427743	0.135841928699508	3.10263847445851	0.00191803791777259	0.0279811525581769
Contig13158	ref|XP_012064208.1| PREDICTED: group XIIA secretory phospholipase A2 [Atta cephalotes]	127.383449968664	0.421704678555056	0.128333347758252	3.2860101128932	0.00101617361604076	0.0168427485658459
Contig50868	ref|XP_011878047.1| PREDICTED: calpain-A-like isoform X10 [Vollenhovia emeryi]	50.4078201003133	0.422389366104549	0.138890117774013	3.04117652770527	0.00235655624456034	0.0331379115045423
Contig100177	#N/A	223.409751681499	0.422944143270313	0.136933370786418	3.08868569320477	0.00201044009495163	0.0291006321951938
Contig128119	ref|XP_011050133.1| PREDICTED: rabenosyn-5 [Acromyrmex echinatior]	191.839202869204	0.422951708001654	0.145849876361752	2.89991132356263	0.00373268243525759	0.0477550939410399
Contig13536	ref|XP_012063440.1| PREDICTED: syntaxin-7 [Atta cephalotes]	487.19790130811	0.423972879085542	0.139725509509356	3.03432694984843	0.00241073014339568	0.0337561959387157
Contig140096	ref|XP_011155488.1| PREDICTED: WW domain-binding protein 2 [Solenopsis invicta]	97.0731052621398	0.424470799414425	0.129428737206455	3.2795715122936	0.00103964857489629	0.0171563521338508
Contig147036	ref|XP_011058008.1| PREDICTED: dnaJ homolog subfamily B member 6 isoform X2 [Acromyrmex echinatior]	310.573687658799	0.426919075513239	0.145139347782099	2.94144270342308	0.0032668727308711	0.0429670913126131
Contig24197	ref|XP_012056809.1| PREDICTED: transcription factor E2F5-like [Atta cephalotes]	107.421683130731	0.427550039439819	0.120242044623556	3.55574492082497	0.00037690963336029	0.00751679750272388
Contig109945	ref|XP_011871134.1| PREDICTED: microfibrillar-associated protein 1 [Vollenhovia emeryi]	221.670778538834	0.428385157645902	0.120221488841708	3.56329938826447	0.000366222593336692	0.00733711194751988
Contig10504	ref|XP_011882035.1| PREDICTED: guanine nucleotide-binding protein G(q) subunit alpha isoform X1 [Vollenhovia emeryi]	309.91687679345	0.428975298015286	0.142577889281758	3.00870843421982	0.00262360766758801	0.036001004779144
Contig31278	#N/A	223.829641080813	0.429079590386482	0.12851997098733	3.33862190514175	0.000841950780418056	0.0144535703188438
Contig15908	ref|XP_011704580.1| PREDICTED: E3 UFM1-protein ligase 1 homolog [Wasmannia auropunctata]	258.309821165571	0.430777231267086	0.121187659457527	3.5546295158713	0.000378512035718562	0.00754431675660451
Contig41893	ref|XP_011162068.1| PREDICTED: transcription initiation factor IIA subunit 1 isoform X2 [Solenopsis invicta]	551.901975952226	0.430927917632285	0.124490729747058	3.4615261594807	0.000537121917218192	0.0100235656641844
Contig29040	ref|XP_011866296.1| PREDICTED: mitochondrial import receptor subunit TOM40 homolog 1-like [Vollenhovia emeryi]	938.463841879711	0.43256219463358	0.146827700586879	2.9460530465614	0.00321857197416875	0.0425090981403312
Contig90108	ref|XP_016913415.1| PREDICTED: splicing factor U2AF 50 kDa subunit isoform X3 [Apis cerana]	218.657603050171	0.435113274778899	0.129089695394879	3.37062748074437	0.000749971971753544	0.0131488945025708
Contig117996	ref|XP_012054306.1| PREDICTED: ubiquitin carboxyl-terminal hydrolase 46 [Atta cephalotes]	518.410310589003	0.43516240440069	0.124661892921989	3.49074118963528	0.000481682619375489	0.00918746930295184
Contig14645	ref|XP_011865819.1| PREDICTED: programmed cell death protein 10 isoform X1 [Vollenhovia emeryi]	409.436418644351	0.435321667394294	0.142283928063956	3.05952803888447	0.00221686035340385	0.0315497218980491
Contig26026	ref|XP_011699811.1| PREDICTED: chitobiosyldiphosphodolichol beta-mannosyltransferase [Wasmannia auropunctata]	525.072108949754	0.435904314350901	0.138264632352579	3.15268125285527	0.00161778351700764	0.0244832154754463
Contig134901	ref|XP_012525467.1| PREDICTED: coatomer subunit beta-like [Monomorium pharaonis]	398.700408728116	0.436397857014492	0.128053941319833	3.40792210311219	0.000654595786622376	0.0117828979303168
Contig106637	ref|XP_011707861.1| PREDICTED: poly(A) polymerase type 3 [Wasmannia auropunctata]	386.620776521496	0.436430959648428	0.124623871753297	3.50198524173908	0.000461805198193148	0.00886318286835064
Contig1527	ref|XP_011170096.1| PREDICTED: tetratricopeptide repeat protein 1 [Solenopsis invicta]	209.624498255869	0.436455323371384	0.144669445709755	3.01691432651943	0.00255361973396759	0.0352830152804482
Contig44162	#N/A	109.919491700963	0.436694580982556	0.121801786818829	3.58528879081311	0.000336705407328955	0.00683869508903832
Contig46393	ref|XP_011879490.1| PREDICTED: PWWP domain-containing protein 2A-like isoform X1 [Vollenhovia emeryi]	387.451437567486	0.436974857007946	0.134115120825856	3.25820723507638	0.00112118497000605	0.0182509156790783
Contig107263	ref|XP_011862840.1| PREDICTED: uncharacterized protein LOC105559280 isoform X2 [Vollenhovia emeryi]	142.192546585292	0.437211052656735	0.136650768355494	3.1994774556945	0.00137676954344709	0.0214707020313976
Contig15779	ref|XP_011877018.1| PREDICTED: LOW QUALITY PROTEIN: voltage-gated potassium channel subunit beta-2 [Vollenhovia emeryi]	409.096118351405	0.437560845025455	0.149636701629708	2.92415457076999	0.00345393189526319	0.0448875438470745
Contig15896	ref|XP_011704019.1| PREDICTED: DCN1-like protein 3 [Wasmannia auropunctata]	176.483926744948	0.437683851280893	0.12324360955386	3.55137157103156	0.000383228970677228	0.00761371427328179
Contig36354	ref|XP_011868708.1| PREDICTED: uncharacterized protein LOC105562459 [Vollenhovia emeryi]	115.287941382787	0.438941756519577	0.140780552213465	3.11791472343433	0.00182135494823912	0.0269123153138484
Contig5374	ref|XP_011860241.1| PREDICTED: syntaxin-binding protein 5 isoform X6 [Vollenhovia emeryi]	1108.27429983593	0.439617713814668	0.12871990409206	3.41530485837104	0.000637106618457356	0.0115293003676909
Contig98785	ref|XP_011871701.1| PREDICTED: protein suppressor of sable isoform X2 [Vollenhovia emeryi]	205.74365707757	0.43979689461773	0.116676766929016	3.76936134067973	0.000163665801504206	0.00379084099149298
Contig27344	ref|XP_011054443.1| PREDICTED: transmembrane 9 superfamily member 4 [Acromyrmex echinatior]	186.727403253816	0.440637754618647	0.129261127437784	3.40889611094205	0.00065226314332002	0.0117487068559173
Contig5748	ref|XP_011878514.1| PREDICTED: alpha-1,3-mannosyl-glycoprotein 2-beta-N-acetylglucosaminyltransferase [Vollenhovia emeryi]	1057.30054916489	0.44108493457772	0.125992107977146	3.5008933627631	0.000463701348990866	0.00889332615686463
Contig138214	ref|XP_011171826.1| PREDICTED: uncharacterized protein LOC105204448 isoform X2 [Solenopsis invicta]	81.371084686144	0.441777494497917	0.132156445778052	3.34283728574128	0.000829265095093581	0.0142733794397793
Contig23448	ref|XP_012064388.1| PREDICTED: twinfilin [Atta cephalotes]	493.644549219545	0.442308122474645	0.126368328600842	3.50015013549603	0.000464996185609357	0.0089118135550067
Contig23018	ref|XP_011642049.1| PREDICTED: PP2C-like domain-containing protein CG9801 isoform X3 [Pogonomyrmex barbatus]	135.380958462049	0.443121382542569	0.111734823390725	3.96583060764341	7.31407942826858e-05	0.00192451191278536
Contig20601	#N/A	53.2499549677543	0.444447636848492	0.146735879026105	3.0288954535068	0.00245449606288526	0.0342347042139383
Contig119727	ref|XP_014213421.1| PREDICTED: heterogeneous nuclear ribonucleoprotein 27C isoform X1 [Copidosoma floridanum]	384.099041349645	0.444564640113937	0.152940876012883	2.90677451119404	0.0036517632889299	0.0469415229176419
Contig11537	ref|XP_011165866.1| PREDICTED: bromodomain-containing protein 7 isoform X3 [Solenopsis invicta]	42.4239536868182	0.445026887749749	0.148700633763099	2.99277061897893	0.0027645744661334	0.0375892321686599
Contig1451	ref|XP_011869861.1| PREDICTED: putative uncharacterized protein DDB_G0277255 isoform X3 [Vollenhovia emeryi]	288.729128015904	0.445833842345091	0.0972291685086316	4.58539190639598	4.53135662101497e-06	0.000190017129499791
Contig3902	ref|XP_011879890.1| PREDICTED: p53 apoptosis effector related to PMP-22 isoform X1 [Vollenhovia emeryi]	209.222711656332	0.445956452921772	0.126207125634837	3.53352832241885	0.000410052152887821	0.00804176611160216
Contig129804	ref|XP_011158322.1| PREDICTED: UPF0605 protein GA14893-like isoform X2 [Solenopsis invicta]	233.543333639037	0.446443555894524	0.134408212832765	3.32154967680437	0.000895190452374504	0.0151959391673947
Contig13971	ref|XP_011861681.1| PREDICTED: chloride intracellular channel exc-4 isoform X1 [Vollenhovia emeryi]	2049.28849047445	0.446886925155326	0.137330394287973	3.25410064882092	0.00113751969999781	0.0184677120083028
Contig26119	ref|XP_012528953.1| PREDICTED: RUN and FYVE domain-containing protein 2 isoform X3 [Monomorium pharaonis]	222.524143263838	0.446945181436351	0.153162850284598	2.91810436150715	0.00352166463051552	0.0456322403213006
Contig30388	ref|XP_011636042.1| PREDICTED: LOW QUALITY PROTEIN: protein phosphatase 1L-like [Pogonomyrmex barbatus]	286.020836067086	0.44972986225843	0.140067253896679	3.21081373231015	0.0013235969904013	0.0208452307811267
Contig28645	ref|XP_011050022.1| PREDICTED: ell-associated factor Eaf [Acromyrmex echinatior]	192.322344230195	0.450040563674299	0.140788002130597	3.19658320924844	0.00139065709580937	0.0216449640067821
Contig22143	ref|XP_012542826.1| PREDICTED: rabankyrin-5 [Monomorium pharaonis]	443.643432708214	0.450289072162431	0.143626327449302	3.13514297941913	0.00171770369363462	0.0256999855150668
Contig35910	#N/A	630.686230844056	0.450313181745228	0.151538177623848	2.97161539624033	0.00296237524540979	0.0397643825132143
Contig18535	ref|XP_003691507.1| PREDICTED: ras-related protein Rab-27A [Apis florea]	309.859455669385	0.450600616031346	0.130423714163742	3.45489789890231	0.000550501249939109	0.0102310095257287
Contig15796	ref|XP_011874955.1| PREDICTED: uncharacterized protein LOC105565947 [Vollenhovia emeryi]	41.3160425275587	0.450605407012188	0.154765834774283	2.91153023320276	0.00359663099046126	0.0463908612459971
Contig12675	ref|XP_011163398.1| PREDICTED: SHC SH2 domain-binding protein 1 [Solenopsis invicta]	187.465483825977	0.451637185606472	0.138440806274984	3.26231259235364	0.00110507213580524	0.0180362561830656
Contig137519	#N/A	103.947051325798	0.452071516966905	0.13692331088418	3.30164026890425	0.000961212601186187	0.0160970468877826
Contig27860	ref|XP_011860858.1| PREDICTED: DEAD-box helicase Dbp80 [Vollenhovia emeryi]	1401.24511033172	0.453053051390021	0.154980071532037	2.92329876294043	0.00346344020303954	0.0449987053579996
Contig80516	ref|XP_011883258.1| PREDICTED: uncharacterized protein LOC105570563 [Vollenhovia emeryi]	258.131824713932	0.45331702624082	0.13090829476214	3.46285945489166	0.000534467490108995	0.00998625571082661
Contig14965	ref|XP_011874779.1| PREDICTED: protein-methionine sulfoxide oxidase mical3b isoform X4 [Vollenhovia emeryi]	1388.20528137456	0.45413270952386	0.144675998507342	3.13896371346498	0.00169546441535324	0.0254374058218513
Contig133448	ref|XP_012540985.1| PREDICTED: protein furry isoform X4 [Monomorium pharaonis]	83.6556294536933	0.454367075622596	0.155362359272972	2.92456343833111	0.00344939763388732	0.0448532857245962
Contig1138	#N/A	122.408967650383	0.454375444813827	0.151246764713351	3.00419943312493	0.00266280715814851	0.0364503815428638
Contig1461	ref|XP_012542365.1| PREDICTED: F-BAR and double SH3 domains protein 2 [Monomorium pharaonis]	474.864316218283	0.454607839966153	0.125353849661453	3.62659656000933	0.00028718145783411	0.00600923101723731
Contig69551	ref|XP_012063484.1| PREDICTED: eukaryotic peptide chain release factor subunit 1 isoform X1 [Atta cephalotes]	1005.22392776577	0.455579436244243	0.146645686793886	3.10666782095386	0.00189208877982129	0.0277158919622688
Contig18414	ref|XP_012529470.1| PREDICTED: nuclear distribution protein nudE-like 1 isoform X1 [Monomorium pharaonis]	436.214725049899	0.456282223132768	0.130882620853466	3.48619411926059	0.000489945335916409	0.00931885649158034
Contig59013	ref|XP_012056127.1| PREDICTED: uridine-cytidine kinase-like 1 [Atta cephalotes]	352.938357976005	0.456400504783542	0.152676203716288	2.98933621398952	0.002795842967736	0.0379572978502903
Contig9931	ref|XP_012532947.1| PREDICTED: eukaryotic translation initiation factor 2 subunit 3-like isoform X2 [Monomorium pharaonis]	137.525926453376	0.456555302966269	0.126496017359958	3.60924646083594	0.000307087747546398	0.00633775647477662
Contig54869	ref|XP_011059165.1| PREDICTED: PIH1 domain-containing protein 1-like isoform X2 [Acromyrmex echinatior]	177.48913959104	0.458831444092881	0.125129459822018	3.66685387074728	0.000245553024380301	0.00529250283666723
Contig25380	ref|XP_012063762.1| PREDICTED: superkiller viralicidic activity 2-like 2 isoform X1 [Atta cephalotes]	857.684230949198	0.458868844420032	0.120041748669947	3.82257714090526	0.000132064144140689	0.00317436136892865
Contig67010	#N/A	141.172438445138	0.459054003095862	0.132308225313855	3.46958023212023	0.000521272351674687	0.00979111200831177
Contig63630	ref|XP_011881826.1| PREDICTED: serine/threonine-protein phosphatase 4 regulatory subunit 4-like isoform X4 [Vollenhovia emeryi]	449.599467440278	0.459110511755657	0.144821741435619	3.17017670968799	0.00152346257218449	0.0233028257685796
Contig66129	ref|XP_011176231.1| PREDICTED: low-density lipoprotein receptor-related protein 6 isoform X2 [Solenopsis invicta]	326.274774050846	0.45913640391479	0.142676611141331	3.21802151201913	0.00129078136582748	0.0204375976818831
Contig48273	#N/A	94.997729819463	0.459444142879059	0.132159530898568	3.47643593886302	0.000508125603843586	0.00960537296342963
Contig26668	ref|XP_011878783.1| PREDICTED: E3 ubiquitin-protein ligase RNF19A-like [Vollenhovia emeryi]	346.659643372389	0.460001921248422	0.157175987985844	2.92666791628409	0.0034261449814545	0.0446199108795405
Contig14927	ref|XP_011647483.1| PREDICTED: carboxypeptidase D-like [Pogonomyrmex barbatus]	1977.68736442036	0.460316251847332	0.139101200238482	3.30921840399754	0.00093556825136483	0.0157375530687906
Contig16975	ref|XP_011875643.1| PREDICTED: protein MON2 homolog isoform X1 [Vollenhovia emeryi]	1512.65695389049	0.461407645455278	0.132306565929901	3.48741305627828	0.000487717469932896	0.00928168916186918
Contig125413	ref|XP_011159178.1| PREDICTED: xaa-Pro aminopeptidase 1 [Solenopsis invicta]	569.362133485372	0.461853390059243	0.111358325484532	4.1474527212013	3.36194866078117e-05	0.000995909361474832
Contig68469	ref|XP_011159315.1| PREDICTED: protein outspread isoform X3 [Solenopsis invicta]	498.14023523582	0.462104302860352	0.137494237322967	3.36089942282376	0.000776891100088278	0.0135368507834218
Contig20355	ref|XP_012538467.1| PREDICTED: probable low-specificity L-threonine aldolase 2 isoform X2 [Monomorium pharaonis]	1005.05375528356	0.462721978063581	0.103759132598818	4.45957831830266	8.21210617275114e-06	0.000314065585592632
Contig129099	ref|XP_011161309.1| PREDICTED: probable leucine--tRNA ligase, mitochondrial isoform X1 [Solenopsis invicta]	197.224443621826	0.463443281204103	0.152772422522576	3.03355326538478	0.00241692040089113	0.0338281101086391
Contig111879	ref|XP_012054526.1| PREDICTED: AFG3-like protein 2 [Atta cephalotes]	509.789647802268	0.463722726049167	0.132982364490604	3.48709941972744	0.000488289802807911	0.00928997381004378
Contig14895	ref|XP_011633067.1| PREDICTED: LOW QUALITY PROTEIN: protein inturned [Pogonomyrmex barbatus]	95.9138668080049	0.46395274420469	0.110265684625249	4.20758956679487	2.58109112858885e-05	0.000792185655213126
Contig6172	ref|XP_012059564.1| PREDICTED: innexin inx3 [Atta cephalotes]	215.515448732145	0.465267944123841	0.132271706978006	3.5175167445386	0.000435604866575838	0.00844881555718188
Contig71450	#N/A	192.266332974038	0.466523475462142	0.157446565329079	2.96305908285178	0.00304598097110732	0.0406606851898692
Contig3909	ref|XP_012530573.1| PREDICTED: neuroligin-4, Y-linked isoform X1 [Monomorium pharaonis]	191.828696451166	0.468123825423275	0.145554262331212	3.21614645923628	0.00129924507420929	0.0205428263371597
Contig126581	ref|XP_012060692.1| PREDICTED: eukaryotic translation initiation factor 2 subunit 3 [Atta cephalotes]	133.223873082464	0.468341228625206	0.155551278201909	3.01084783126814	0.00260519374031591	0.0358283302784831
Contig42692	ref|XP_012543108.1| PREDICTED: zinc finger CCCH domain-containing protein 11A-like isoform X1 [Monomorium pharaonis]	465.274184435694	0.468514144667449	0.155409806212606	3.01470129900623	0.00257232450618326	0.035469569454147
Contig132048	ref|XP_014489552.1| PREDICTED: solute carrier family 12 member 8 [Dinoponera quadriceps]	60.8546976432884	0.469058827016129	0.148912294545701	3.14989993571132	0.00163326392475914	0.0246679422978379
Contig23427	ref|XP_011691311.1| PREDICTED: calcium-transporting ATPase sarcoplasmic/endoplasmic reticulum type isoform X2 [Wasmannia auropunctata]	5363.43059195703	0.469114882503825	0.141268340631221	3.32073612819197	0.000897803767338313	0.0152326736023793
Contig45408	ref|XP_011688198.1| PREDICTED: toll-interacting protein A-like [Wasmannia auropunctata]	425.332117072155	0.470810798366814	0.114110390400926	4.1259239996693	3.69249203070715e-05	0.0010755405221989
Contig142796	ref|XP_012533453.1| PREDICTED: golgin subfamily A member 1-like [Monomorium pharaonis]	228.530569103535	0.472291124035104	0.138985929246155	3.39812185734744	0.000678501905166234	0.0121358951948317
Contig24485	ref|XP_011159811.1| PREDICTED: uncharacterized protein LOC105195885 [Solenopsis invicta]	236.405931671506	0.473324495317629	0.153696495754923	3.07960499029443	0.00207275299885023	0.0298306616986178
Contig842	ref|XP_012537648.1| PREDICTED: uncharacterized protein LOC105837421 [Monomorium pharaonis]	817.044424977799	0.473590740641796	0.131176463288899	3.61033320130591	0.000305803906980566	0.00631895338126808
Contig1530	ref|XP_011701809.1| PREDICTED: uncharacterized protein LOC105458304 isoform X1 [Wasmannia auropunctata]	77.8861053502076	0.4737183331818	0.16331463211724	2.90064844184768	0.00372391411293501	0.0476743971029518
Contig19082	ref|XP_011867248.1| PREDICTED: RING finger and transmembrane domain-containing protein 2 [Vollenhovia emeryi]	473.866140412582	0.474049739888023	0.130990340702053	3.61896714938915	0.000295781178706048	0.0061481722456172
Contig6223	ref|XP_014480600.1| PREDICTED: histone deacetylase 5 isoform X7 [Dinoponera quadriceps]	1506.85751492152	0.474233909515879	0.145033133115186	3.26983151594222	0.00107611558800363	0.0176396315183808
Contig31741	ref|XP_011701152.1| PREDICTED: enhancer of mRNA-decapping protein 4 [Wasmannia auropunctata]	492.832804249107	0.47556792961131	0.108311172216152	4.39075600310407	1.12957237809205e-05	0.00040967691625815
Contig17072	ref|XP_011692060.1| PREDICTED: transient receptor potential cation channel protein painless-like [Wasmannia auropunctata]	109.364628495512	0.475622821932056	0.139030740416728	3.42099035440962	0.000623935450912785	0.011336332025735
Contig6113	ref|XP_011866005.1| PREDICTED: WD repeat-containing protein 35 [Vollenhovia emeryi]	323.944720274803	0.477624387732388	0.12798109181673	3.73199181966935	0.000189971672242301	0.00427882716483431
Contig15319	ref|XP_012063731.1| PREDICTED: protein fem-1 homolog B-like [Atta cephalotes]	116.98892191872	0.478873000642989	0.154851719542199	3.09246162754098	0.0019850389540636	0.0288005855051226
Contig14878	ref|XP_011860856.1| PREDICTED: something about silencing protein 10 isoform X1 [Vollenhovia emeryi]	284.083894973452	0.478876148272783	0.160543471421898	2.98284411089085	0.00285583412248294	0.03862867431542
Contig90756	#N/A	253.184999252144	0.479082733837309	0.159999269756196	2.99428075245173	0.00275092685214727	0.037456244390271
Contig23279	ref|XP_012061004.1| PREDICTED: coatomer subunit zeta-1 isoform X1 [Atta cephalotes]	59.0954902030038	0.479522098072148	0.158534429096213	3.02471898883951	0.00248864235474607	0.0346077465439432
Contig549	ref|XP_014483582.1| PREDICTED: myosin regulatory light chain sqh [Dinoponera quadriceps]	646.060443331627	0.481385323182851	0.146084651785789	3.29524914012684	0.000983344565372517	0.0163925113243269
Contig11314	ref|XP_011166619.1| PREDICTED: uncharacterized protein LOC105200666 isoform X1 [Solenopsis invicta]	519.65018852203	0.481434023022467	0.162288459075412	2.96653271443507	0.00301178317861513	0.0403079013110344
Contig126608	ref|XP_011632695.1| PREDICTED: CXXC-type zinc finger protein 1 isoform X2 [Pogonomyrmex barbatus]	447.698562375902	0.481469632426986	0.153554584670517	3.13549499977535	0.00171564353061834	0.0256748269434204
Contig141014	ref|XP_012055252.1| PREDICTED: MOB kinase activator-like 4 [Atta cephalotes]	243.626560824047	0.481492795161148	0.129947538723033	3.70528599381469	0.000211152346543994	0.00467590044484278
Contig9406	ref|XP_012064105.1| PREDICTED: E3 ubiquitin-protein ligase UBR5 [Atta cephalotes]	888.271975492994	0.481783914034209	0.1341577121468	3.59117568662041	0.000329189628865853	0.00670915574526809
Contig80489	ref|XP_006613297.1| PREDICTED: RNA-binding protein 1-like isoform X4 [Apis dorsata]	152.409619637146	0.482929276454005	0.14602897385066	3.30707847709649	0.000942744770327635	0.0158307812386345
Contig4978	ref|XP_011642068.1| PREDICTED: ubiquitin-conjugating enzyme E2 W [Pogonomyrmex barbatus]	834.203997178353	0.48358531173325	0.135233579517487	3.57592628590236	0.000348989987125789	0.00705124077980882
Contig27678	ref|XP_011063316.1| PREDICTED: partitioning defective 3 homolog [Acromyrmex echinatior]	260.922060133332	0.484275559109802	0.145013157247689	3.33952841453302	0.000839207652285522	0.0144207180128039
Contig112535	#N/A	73.4804850885491	0.484702690964768	0.165864277659681	2.92228500195368	0.00347473424378995	0.045118978335631
Contig64196	#N/A	71.6558687848191	0.486045640467105	0.158193428141585	3.07247681636993	0.00212290322941568	0.0304297007244455
Contig31122	ref|XP_011631338.1| PREDICTED: plastin-2 isoform X2 [Pogonomyrmex barbatus]	752.458435693957	0.486906437884803	0.148227972422476	3.28484853383162	0.00102037209327798	0.0168958169789744
Contig90115	ref|XP_011708242.1| PREDICTED: superkiller viralicidic activity 2-like 2 [Wasmannia auropunctata]	125.245924941212	0.486974884724253	0.134034644858167	3.63320158933209	0.00027992614655465	0.00588374216349386
Contig24768	ref|XP_011059918.1| PREDICTED: solute carrier family 12 member 9 [Acromyrmex echinatior]	968.809173844191	0.487099578541879	0.124951305344888	3.89831524526612	9.68642631001824e-05	0.00244348031548887
Contig139944	ref|XP_011871233.1| PREDICTED: phosphatidylinositol 4-kinase type 2-alpha [Vollenhovia emeryi]	252.374839036722	0.487233461999477	0.142780603120107	3.41246255690359	0.000643787704984025	0.0116207408257292
Contig123947	ref|XP_012530245.1| PREDICTED: signal recognition particle 54 kDa protein [Monomorium pharaonis]	623.648604721506	0.487568706588992	0.110216463030189	4.4237375541206	9.70078548732856e-06	0.000361517538631101
Contig27485	ref|XP_011060447.1| PREDICTED: malectin-A [Acromyrmex echinatior]	91.7064711427334	0.487608225476461	0.166462779922081	2.92923274322768	0.00339799883524483	0.04432203655313
Contig30433	ref|XP_011863797.1| PREDICTED: uncharacterized protein LOC105559811 [Vollenhovia emeryi]	139.106147140787	0.487900996493714	0.148408813545895	3.28754731499036	0.00101064204605695	0.0167633574405537
Contig130995	#N/A	67.9559598223412	0.488420021858959	0.140744239329787	3.47026652163368	0.00051994215831713	0.009774249495151
Contig17880	ref|XP_011638676.1| PREDICTED: signal recognition particle 54 kDa protein [Pogonomyrmex barbatus]	306.064992636233	0.489604246933552	0.123770608010696	3.95573920822333	7.6298359479772e-05	0.00199674367473751
Contig111855	ref|XP_011171299.1| PREDICTED: LOW QUALITY PROTEIN: transcriptional activator hacA [Solenopsis invicta]	277.791504932453	0.489649119275264	0.155716297001066	3.14449501243862	0.0016637374734226	0.0250556461655449
Contig21958	ref|XP_011175685.1| PREDICTED: tetratricopeptide repeat protein 8 isoform X1 [Solenopsis invicta]	337.632535431004	0.489895556481178	0.135283352291561	3.62125529995266	0.00029317702485628	0.00610826600770659
Contig101491	ref|XP_011881504.1| PREDICTED: katanin p60 ATPase-containing subunit A-like 1 [Vollenhovia emeryi]	215.217657877829	0.490076131532604	0.122831885999115	3.98981199015485	6.61256888015052e-05	0.00176241063574385
Contig125467	ref|XP_011878808.1| PREDICTED: uncharacterized protein LOC105568054 [Vollenhovia emeryi]	153.908853319642	0.492371830026942	0.164604831738651	2.99123558419414	0.00277851048075086	0.0377484392242583
Contig23837	ref|XP_011176200.1| PREDICTED: phosphatidylinositol N-acetylglucosaminyltransferase subunit Q isoform X1 [Solenopsis invicta]	269.109439182024	0.493003057076798	0.126776790261019	3.88874853245425	0.000100762452912723	0.00252444102887604
Contig130436	#N/A	40.9579889869849	0.493066096633073	0.159947437546388	3.08267581023343	0.00205148510110962	0.0295968192023276
Contig27391	ref|XP_012055728.1| PREDICTED: ATP-dependent RNA helicase DHX8 [Atta cephalotes]	366.948208022622	0.494284905219438	0.133299359300643	3.7080816277941	0.000208835343531901	0.00463594635418812
Contig80582	ref|XP_011165999.1| PREDICTED: grpE protein homolog 1, mitochondrial [Solenopsis invicta]	182.757830784927	0.494368477253049	0.1348521039202	3.66600492600098	0.000246369180889143	0.00530105059353225
Contig66978	ref|XP_011872869.1| PREDICTED: mediator of RNA polymerase II transcription subunit 13-like isoform X2 [Vollenhovia emeryi]	86.0708264701565	0.495961520940004	0.168391933730023	2.94528075041387	0.00322661737165418	0.04258632488949
Contig94567	ref|XP_011638362.1| PREDICTED: RNA-binding protein 5-like [Pogonomyrmex barbatus]	382.509384751799	0.498071639931265	0.116150357141765	4.28816279336407	1.80157039596129e-05	0.000592717534395666
Contig19111	ref|XP_011690209.1| PREDICTED: myotubularin-related protein 6 [Wasmannia auropunctata]	286.498972881723	0.499467362505969	0.146236611044976	3.41547413426008	0.000636710762224601	0.0115236745373451
Contig126951	ref|XP_011699069.1| PREDICTED: GTP-binding protein SAR1b isoform X2 [Wasmannia auropunctata]	347.993650351309	0.500851017952107	0.173001984082638	2.89505938679215	0.00379086806706014	0.0483398948797644
Contig11043	ref|XP_011880255.1| PREDICTED: serine/threonine-protein kinase PLK4 [Vollenhovia emeryi]	181.897156604089	0.501332642678225	0.165715278134703	3.02526507103777	0.00248415308580692	0.0345559479514432
Contig71332	#N/A	114.031845894491	0.50207976106559	0.159994500249748	3.1381063741682	0.00170043154213321	0.0254893692002711
Contig11330	ref|XP_011871327.1| PREDICTED: tubulin-specific chaperone C [Vollenhovia emeryi]	500.03589404346	0.502940961909199	0.137767899743845	3.65063968344097	0.00026158799872062	0.00558485435429757
Contig58980	#N/A	128.260472523067	0.503654347841215	0.17350534782452	2.90281742987311	0.00369822161406986	0.0474006392068917
Contig85217	#N/A	296.907976339889	0.504257658037975	0.141792585787747	3.55630483241776	0.000376107651076063	0.007504114019866
Contig33356	#N/A	142.490454556546	0.505344586580395	0.139765527455832	3.61565971079737	0.000299583703476323	0.00621504426544869
Contig139469	ref|XP_011062618.1| PREDICTED: eukaryotic translation initiation factor 3 subunit E isoform X2 [Acromyrmex echinatior]	238.381811667432	0.506069773950609	0.16308845950759	3.10303853184079	0.00191544699703648	0.0279614024818197
Contig60167	ref|XP_012529203.1| PREDICTED: symplekin isoform X1 [Monomorium pharaonis]	258.032304952186	0.507682728973056	0.138707307576645	3.66010081114529	0.000252116039313896	0.00541414448203935
Contig123	#N/A	639.768855012452	0.508419654624256	0.153634367319446	3.30928335563825	0.000935351221224553	0.0157375530687906
Contig3169	ref|XP_011647488.1| PREDICTED: serine/threonine-protein phosphatase Pgam5, mitochondrial-like [Pogonomyrmex barbatus]	354.512140347547	0.508591513885876	0.169026257018579	3.00894975051108	0.00262152470563161	0.0359833452863891
Contig53003	ref|XP_011173748.1| PREDICTED: uncharacterized protein LOC105205906, partial [Solenopsis invicta]	590.045134979285	0.509127449478072	0.15509837967919	3.28260972507364	0.00102850949875353	0.0170009413124865
Contig108222	#N/A	50.7463509358301	0.510178815606663	0.176607214720314	2.88877674909608	0.00386743542794856	0.0491570136924327
Contig71096	#N/A	62.7986651532619	0.510433751313474	0.174490186540276	2.92528629508718	0.00344139454840961	0.0447886526193802
Contig1121	ref|XP_011881485.1| PREDICTED: WD repeat-containing protein 48 isoform X1 [Vollenhovia emeryi]	410.889927997304	0.510622704790349	0.147233343230611	3.4681186583569	0.000524115808337218	0.00983226466065064
Contig10197	ref|XP_011639943.1| PREDICTED: serine/threonine-protein phosphatase 4 regulatory subunit 1-like isoform X2 [Pogonomyrmex barbatus]	406.881974695791	0.510638582064605	0.15934586435474	3.20459262706567	0.00135253762487426	0.0212000736777275
Contig115762	ref|XP_011064426.1| PREDICTED: transcription initiation factor TFIID subunit 6-like isoform X2 [Acromyrmex echinatior]	443.078972561384	0.511092141273909	0.115167048739181	4.43783310303784	9.08690319886991e-06	0.000342880158712171
Contig9436	ref|XP_011049335.1| PREDICTED: SH3 domain-containing kinase-binding protein 1 isoform X2 [Acromyrmex echinatior]	160.147634023439	0.5112268990119	0.166209000964228	3.07580754379197	0.00209933302272984	0.0301523987020212
Contig121152	ref|XP_011879222.1| PREDICTED: ER degradation-enhancing alpha-mannosidase-like protein 3 [Vollenhovia emeryi]	2461.70406736574	0.511682785576307	0.132224060131357	3.86981601584447	0.000108917517459981	0.00269637462811572
Contig1163	ref|XP_011176003.1| PREDICTED: eukaryotic translation initiation factor 3 subunit E isoform X2 [Solenopsis invicta]	634.852688202121	0.512050698807157	0.142047445486901	3.60478639409518	0.00031240977247907	0.00642705383570641
Contig6560	ref|XP_012059797.1| PREDICTED: LOW QUALITY PROTEIN: tubulin-specific chaperone C-like [Atta cephalotes]	145.071247824654	0.512370574758183	0.17325774965312	2.95727363297746	0.00310372549048465	0.0412817407479978
Contig3488	ref|XP_011874451.1| PREDICTED: cell growth regulator with RING finger domain protein 1-like [Vollenhovia emeryi]	171.211158302604	0.512389469476756	0.165561390282265	3.0948608767007	0.00196905233843611	0.0286145589182034
Contig6718	ref|XP_011866756.1| PREDICTED: transmembrane 9 superfamily member 4 isoform X1 [Vollenhovia emeryi]	543.009805575668	0.512465037040004	0.136465474595356	3.75527244938364	0.00017315301695612	0.00396119656570297
Contig133409	ref|XP_011876407.1| PREDICTED: conserved oligomeric Golgi complex subunit 1 [Vollenhovia emeryi]	113.267122058474	0.513296550756121	0.177314733357426	2.89483305214932	0.00379360234250422	0.0483675603228879
Contig39911	ref|XP_011865104.1| PREDICTED: uncharacterized protein LOC105560531 isoform X1 [Vollenhovia emeryi]	696.244942867154	0.513338744283028	0.172632814476234	2.9735872976438	0.00294340666270462	0.0395583857917736
Contig18797	ref|XP_012534101.1| PREDICTED: kaptin-like isoform X1 [Monomorium pharaonis]	269.348604895094	0.513716921396259	0.148102104190472	3.46866726981525	0.000523046807544248	0.00981764287312189
Contig142802	ref|XP_012533096.1| PREDICTED: ubiquitin-conjugating enzyme E2 S [Monomorium pharaonis]	318.757953847267	0.514048059021778	0.152224733373459	3.3769023445135	0.00073307071655862	0.0128986572446499
Contig67627	ref|XP_011874105.1| PREDICTED: protein transport protein Sec31A isoform X2 [Vollenhovia emeryi]	959.875552205283	0.51555794486659	0.140206422291516	3.67713501593135	0.000235868211625543	0.0051177874094292
Contig7706	ref|XP_011869564.1| PREDICTED: heterogeneous nuclear ribonucleoprotein U-like isoform X3 [Vollenhovia emeryi]	108.189328129984	0.515983803720969	0.167429120091163	3.08180442828596	0.00205749968541078	0.0296646568506589
Contig5357	ref|XP_012139858.1| PREDICTED: endophilin-B1 isoform X4 [Megachile rotundata]	706.750152669661	0.516441526485894	0.138906310759155	3.71791262516023	0.000200875717830626	0.00448470533418099
Contig123943	ref|XP_011059317.1| PREDICTED: protein transport protein Sec31A isoform X2 [Acromyrmex echinatior]	204.561926706811	0.51697797893128	0.162184241375156	3.18759686235752	0.00143460398589718	0.0222041069326022
Contig24886	#N/A	213.291973284602	0.517712077293269	0.175831247008142	2.94436902485994	0.00323613885947916	0.0426580224814742
Contig29746	ref|XP_011883270.1| PREDICTED: protein transport protein Sec24A [Vollenhovia emeryi]	1367.17587251886	0.51844303372618	0.160068327250189	3.23888580978201	0.00119997605537522	0.0192652483454073
Contig42426	ref|XP_011639445.1| PREDICTED: LOW QUALITY PROTEIN: proteasome activator complex subunit 3 [Pogonomyrmex barbatus]	527.38446636388	0.519616569543253	0.132645023438427	3.9173468862513	8.95288745652744e-05	0.0022865101309407
Contig12734	#N/A	268.731133458446	0.520563854513359	0.16431859336174	3.16801552315725	0.00153483325067077	0.0234582301878131
Contig124768	ref|XP_012339956.1| PREDICTED: polyubiquitin-like, partial [Apis florea]	1914.37451711373	0.520911089339667	0.17525768044697	2.97225826572141	0.00295617898321856	0.0397077762368691
Contig126890	ref|XP_011865774.1| PREDICTED: NSFL1 cofactor p47 isoform X1 [Vollenhovia emeryi]	606.965658479306	0.521318956661895	0.140580856967816	3.70832108941579	0.000208637993599548	0.00463232365160594
Contig36549	ref|XP_011698703.1| PREDICTED: calcium release-activated calcium channel protein 1-like isoform X1 [Wasmannia auropunctata]	112.34069984273	0.521901897959984	0.175537971604934	2.97315670899159	0.00294753919929104	0.039600513272504
Contig77555	ref|XP_011863279.1| PREDICTED: E3 ubiquitin-protein ligase TRIM37-like [Vollenhovia emeryi]	120.660298586836	0.522498419214064	0.151238989878999	3.45478649144705	0.000550728759186118	0.010232433202941
Contig97343	ref|XP_011173426.1| PREDICTED: UDP-glucose 4-epimerase [Solenopsis invicta]	169.263645923601	0.523726374436537	0.173626249819555	3.016400889732	0.0025579482470947	0.0353234897929486
Contig58146	#N/A	424.497789241844	0.52421006639782	0.144463903937723	3.62865776231411	0.00028489862732509	0.00597252163333818
Contig58943	ref|XP_011877239.1| PREDICTED: kinase D-interacting substrate of 220 kDa isoform X3 [Vollenhovia emeryi]	1403.53005292755	0.524788986655609	0.114069725452605	4.60059831452522	4.21279125127583e-06	0.000178694497067001
Contig117213	ref|XP_011051270.1| PREDICTED: uncharacterized protein LOC105144206 [Acromyrmex echinatior]	771.519673160131	0.525156845241188	0.153469490863569	3.42189735748873	0.000621857845826388	0.0113152596141017
Contig7574	#N/A	22.5102106587445	0.527229495541506	0.169507245618587	3.11036553993591	0.00186855946639674	0.0274483127681897
Contig145028	ref|XP_011882035.1| PREDICTED: guanine nucleotide-binding protein G(q) subunit alpha isoform X1 [Vollenhovia emeryi]	343.49833415047	0.527697039914801	0.153140420469176	3.44583773701349	0.000569292083472433	0.0105096619395631
Contig148730	ref|XP_012543666.1| PREDICTED: DNA-directed RNA polymerase II 16 kDa polypeptide-like isoform X2 [Monomorium pharaonis]	68.1194640236923	0.527726853059528	0.16757710985717	3.14915833975965	0.00163741449823789	0.0247113654311188
Contig43218	ref|XP_012063799.1| PREDICTED: heat shock 70 kDa protein cognate 4 isoform X2 [Atta cephalotes]	376.879204479465	0.528436842401409	0.166943090312382	3.16537115380219	0.00154885242257502	0.0236272297452293
Contig83351	ref|XP_011647746.1| PREDICTED: LOW QUALITY PROTEIN: midnolin-A-like [Pogonomyrmex barbatus]	192.17119100625	0.528723157467022	0.156421875275085	3.38011008074928	0.000724568033711738	0.0127768338103007
Contig51003	ref|XP_011875643.1| PREDICTED: protein MON2 homolog isoform X1 [Vollenhovia emeryi]	726.539847720865	0.528915895860203	0.146928451190382	3.59981944664252	0.000318438214037027	0.00652928333208608
Contig63583	#N/A	276.035664413129	0.529122771959209	0.164056155842762	3.22525399453064	0.00125860951729126	0.0200146659331539
Contig26273	ref|XP_011881258.1| PREDICTED: AP-3 complex subunit mu-1 [Vollenhovia emeryi]	264.676272063946	0.529239943229953	0.142251126763924	3.72046222247691	0.00019885848782312	0.00444785929021874
Contig72457	ref|XP_011687890.1| PREDICTED: uncharacterized protein LOC105450004 isoform X1 [Wasmannia auropunctata]	152.098109672029	0.529351835974717	0.179869467992028	2.94297771536289	0.00325071817060378	0.0428108606931325
Contig18236	#N/A	668.316283573545	0.53024573461637	0.155136435885163	3.41793165216761	0.000630989501760495	0.011440814794518
Contig24128	ref|XP_011064839.1| PREDICTED: calcium uptake protein 3, mitochondrial isoform X1 [Acromyrmex echinatior]	281.59952237453	0.531882164115683	0.155582747514705	3.41864488583743	0.000629338023795727	0.0114161378757402
Contig14411	ref|XP_011862248.1| PREDICTED: ribosome biogenesis regulatory protein homolog [Vollenhovia emeryi]	177.941182820169	0.532112386839851	0.163108305130804	3.26232552298993	0.00110502172525356	0.0180362561830656
Contig29958	ref|XP_011873116.1| PREDICTED: golgin subfamily A member 2 [Vollenhovia emeryi]	453.007348874074	0.533583134317674	0.123601541442843	4.3169618120371	1.58191513611342e-05	0.00053454027411477
Contig26404	ref|XP_012537422.1| PREDICTED: elastin [Monomorium pharaonis]	827.903749268128	0.534082845477849	0.147593533177213	3.61860600516003	0.000296194172782989	0.00615508374927862
Contig64726	ref|XP_011700662.1| PREDICTED: multivesicular body subunit 12B [Wasmannia auropunctata]	86.0034906553599	0.535423731126428	0.154688298064465	3.4613072729218	0.000537558865441696	0.0100275801895475
Contig53695	#N/A	62.9934078107591	0.535878033211795	0.175010162613055	3.06198237411283	0.00219876399451891	0.0313316360568128
Contig50830	ref|XP_011693146.1| PREDICTED: annexin B9-like isoform X4 [Wasmannia auropunctata]	543.012269202388	0.537217318160406	0.175956729704316	3.05312174796136	0.00226474034604601	0.0320920620897809
Contig94106	#N/A	74.7071162868402	0.538604171079174	0.141676041772247	3.80166021256449	0.000143729751805394	0.00340411685968682
Contig24612	ref|XP_014475630.1| PREDICTED: uncharacterized protein DDB_G0290685-like [Dinoponera quadriceps]	73.1340257712667	0.539777189994221	0.179614510103571	3.005198130613	0.00265407900745277	0.0363566414697199
Contig7174	ref|XP_011638740.1| PREDICTED: cytosolic purine 5'-nucleotidase isoform X3 [Pogonomyrmex barbatus]	415.355453217281	0.539860820487188	0.182803411310504	2.95323165260958	0.003144658829316	0.0417197967598181
Contig16491	#N/A	376.379722003693	0.540186239687265	0.151510931691432	3.56532847931667	0.000363400759528617	0.00729566700262234
Contig100285	ref|XP_014485620.1| PREDICTED: RNA-binding protein 1 isoform X3 [Dinoponera quadriceps]	41.2641007895722	0.540247702640462	0.163818954354492	3.29783390920325	0.000974337495295715	0.0162766451203539
Contig99577	ref|XP_011880772.1| PREDICTED: beta-1,3-galactosyltransferase 1-like [Vollenhovia emeryi]	283.421676566319	0.540664320577879	0.181937746671843	2.97169955365592	0.00296156342520367	0.039761356533568
Contig35622	ref|XP_011644745.1| PREDICTED: LIM domain and actin-binding protein 1 isoform X8 [Pogonomyrmex barbatus]	41.5110937851913	0.540820564171977	0.178322636921835	3.03282058580727	0.0024227959871032	0.0338831654114689
Contig112194	ref|XP_011876527.1| PREDICTED: meiosis arrest female protein 1 homolog isoform X5 [Vollenhovia emeryi]	157.931018417602	0.541027126782904	0.131770878503773	4.10581710409871	4.02888170487053e-05	0.00115830562544904
Contig35132	ref|XP_012527613.1| PREDICTED: coatomer subunit alpha [Monomorium pharaonis]	153.166034943248	0.54383497118841	0.173877736066943	3.1276860596979	0.00176188263803565	0.0262221194111683
Contig125801	#N/A	77.1443067048903	0.545958553743263	0.164043392676503	3.32813498206479	0.000874294937693554	0.0148952608913757
Contig50308	ref|XP_011707766.1| PREDICTED: ceramide synthase 6 [Wasmannia auropunctata]	963.870757233235	0.546668562905613	0.145195009938533	3.76506439950685	0.000166506162301004	0.00384480958526959
Contig30266	ref|XP_011871327.1| PREDICTED: tubulin-specific chaperone C [Vollenhovia emeryi]	569.963215305442	0.546754391152121	0.148119068646883	3.69131669640447	0.000223096148291061	0.0048869263534718
Contig5122	ref|XP_012541171.1| PREDICTED: protein N-terminal glutamine amidohydrolase [Monomorium pharaonis]	20.6752915744801	0.547090368909284	0.175127032814308	3.12396298913702	0.0017843289934933	0.0265022332212569
Contig83097	ref|XP_011862879.1| PREDICTED: uncharacterized protein LOC105559303 [Vollenhovia emeryi]	285.392179429704	0.547317457255758	0.176073103968001	3.1084671362142	0.00188060559864144	0.0275703952820454
Contig18749	ref|XP_011634591.1| PREDICTED: uncharacterized protein LOC105425493 [Pogonomyrmex barbatus]	137.247619385728	0.547638653486459	0.113623311572618	4.81977374102899	1.43721125161299e-06	6.89200730821229e-05
Contig13038	ref|XP_011706840.1| PREDICTED: transmembrane emp24 domain-containing protein eca-like [Wasmannia auropunctata]	371.655398996434	0.547640672832909	0.124136937904348	4.41158515811696	1.02616579607119e-05	0.000378056094182012
Contig31205	ref|XP_012057034.1| PREDICTED: fasciclin-3 [Atta cephalotes]	75.1120066052078	0.547845891776964	0.169073339771844	3.24028550282531	0.00119410073819352	0.0191890955693064
Contig5155	ref|XP_011707252.1| PREDICTED: N-terminal kinase-like protein [Wasmannia auropunctata]	411.490085419731	0.548307791441522	0.164851676782405	3.32606742098994	0.000880806205632993	0.0149930529397154
Contig21560	ref|XP_011873276.1| PREDICTED: selT-like protein [Vollenhovia emeryi]	1070.39286704515	0.54835112831939	0.146361664982523	3.74654885474873	0.000179284099848908	0.00408148966206308
Contig13041	ref|XP_011866274.1| PREDICTED: transmembrane and ubiquitin-like domain-containing protein 2 [Vollenhovia emeryi]	634.464242885709	0.548392221700543	0.133447118642601	4.10943471300607	3.96628824798676e-05	0.00114224721695153
Contig45452	ref|XP_012063439.1| PREDICTED: ribosome biogenesis regulatory protein homolog [Atta cephalotes]	53.4062380290453	0.548990061079174	0.179854642906548	3.05240972491562	0.00227012003082294	0.0321524864605768
Contig74648	ref|XP_011688033.1| PREDICTED: ATP-binding cassette sub-family F member 1 [Wasmannia auropunctata]	367.027892337833	0.549107671842892	0.179113314385172	3.06569991029294	0.00217161150830909	0.0310066248776404
Contig26067	ref|XP_011869209.1| PREDICTED: uncharacterized protein LOC105562757 [Vollenhovia emeryi]	138.498475528547	0.550016065664197	0.18580271923011	2.96021537221434	0.00307424044535375	0.0409699335452244
Contig127939	ref|XP_011159896.1| PREDICTED: probable ATP-dependent RNA helicase DDX47 [Solenopsis invicta]	373.807499034632	0.551274672943549	0.133236002732432	4.13758039597325	3.50987485030377e-05	0.00103184081497745
Contig29432	ref|XP_011877504.1| PREDICTED: nicastrin [Vollenhovia emeryi]	649.964980977096	0.553129480061433	0.162088316644727	3.41251912236098	0.000643654109618961	0.0116207408257292
Contig129891	ref|XP_011173201.1| PREDICTED: transcription factor Dp-1 [Solenopsis invicta]	126.215022658712	0.553412394304015	0.159249728794737	3.47512299388171	0.000510619175204132	0.00963639143141291
Contig29661	ref|XP_012060220.1| PREDICTED: baculoviral IAP repeat-containing protein 7-B-like [Atta cephalotes]	346.116186861382	0.553939817393957	0.160323638114239	3.45513502506254	0.00055001729737357	0.0102234163604741
Contig1122	ref|XP_011638667.1| PREDICTED: leukotriene A-4 hydrolase-like [Pogonomyrmex barbatus]	117.794815347316	0.554190458551752	0.165215498724042	3.35434909455687	0.000795519310629702	0.0138029114370185
Contig135639	ref|XP_011053382.1| PREDICTED: dnaJ homolog subfamily C member 21 [Acromyrmex echinatior]	356.25532663882	0.555533940830771	0.164722989247834	3.37253435824276	0.000744797932681007	0.0130717001219881
Contig63582	ref|XP_011868285.1| PREDICTED: serine/threonine-protein kinase fray2-like [Vollenhovia emeryi]	1567.85059869646	0.555605973233336	0.152327278939772	3.6474489474273	0.000264856915134346	0.00563866651319139
Contig6695	ref|XP_011692650.1| PREDICTED: short-chain dehydrogenase/reductase family 16C member 6-like isoform X3 [Wasmannia auropunctata]	136.937665728236	0.555650711286006	0.165442170340357	3.3585796785843	0.000783441317532935	0.013628220989727
Contig18490	ref|XP_011641873.1| PREDICTED: disks large-associated protein 2-like [Pogonomyrmex barbatus]	519.06322274839	0.556380968709961	0.136531177255195	4.07512027578882	4.59905706516617e-05	0.00129774557810122
Contig149629	#N/A	444.181575388691	0.556730226887429	0.173871606797894	3.20196170691954	0.0013649514147744	0.0213551593404725
Contig1170	ref|XP_011164438.1| PREDICTED: calmodulin-binding transcription activator 2 isoform X1 [Solenopsis invicta]	202.478293908577	0.556848442383423	0.177784347931097	3.13215673293826	0.00173527212702161	0.0259028282040626
Contig130367	ref|XP_011158849.1| PREDICTED: uncharacterized protein LOC105195218 isoform X2 [Solenopsis invicta]	137.902403102008	0.557030942803023	0.130206749987219	4.27804966223103	1.88537963382547e-05	0.000615957296221651
Contig3485	ref|XP_011061390.1| PREDICTED: G patch domain-containing protein 2-like isoform X3 [Acromyrmex echinatior]	252.147894543328	0.557678458623299	0.154708977634566	3.60469358113515	0.000312521434320048	0.00642752991896697
Contig59715	ref|XP_011062903.1| PREDICTED: BRISC and BRCA1-A complex member 1-like [Acromyrmex echinatior]	42.3269912944801	0.558420740185813	0.178598736587257	3.12667799815587	0.00176793446254531	0.0263006432869262
Contig60244	ref|XP_011881342.1| PREDICTED: hydroxysteroid dehydrogenase-like protein 2 [Vollenhovia emeryi]	281.447121631782	0.559097675202721	0.185759934951911	3.00978612717246	0.00261431707517844	0.0359220104240331
Contig11013	#N/A	72.5323191364887	0.560564772597687	0.164571333101063	3.40621153170974	0.000658711205157944	0.0118428292955441
Contig14880	ref|XP_012541827.1| PREDICTED: insulin-degrading enzyme isoform X1 [Monomorium pharaonis]	425.565328321029	0.560933620938526	0.156432527938636	3.58578633440331	0.000336064036751738	0.00682669087478283
Contig126563	ref|XP_011067339.1| PREDICTED: LOW QUALITY PROTEIN: E3 ubiquitin-protein ligase TRIP12 [Acromyrmex echinatior]	1099.67948493836	0.561149554369319	0.173187209925957	3.24013277082776	0.00119474054805826	0.0191971024507551
Contig20390	ref|XP_011696503.1| PREDICTED: uncharacterized protein LOC105455127 [Wasmannia auropunctata]	93.4369793333607	0.56212975631579	0.185703429657599	3.02702948110463	0.0024696987025083	0.0344078199960921
Contig16559	ref|XP_012061375.1| PREDICTED: serine/threonine-protein kinase GL21140 [Atta cephalotes]	533.58040184223	0.562156145467443	0.154428194037605	3.64024295544474	0.000272380906250843	0.00576626041528284
Contig17397	ref|XP_011164246.1| PREDICTED: mediator of RNA polymerase II transcription subunit 25-like isoform X1 [Solenopsis invicta]	160.079486248303	0.562515508640164	0.165064928332741	3.40784389707688	0.000654783417662192	0.0117847111350817
Contig12736	ref|XP_011708303.1| PREDICTED: integrator complex subunit 10 [Wasmannia auropunctata]	267.499470528921	0.564529000418891	0.182741272263024	3.08922551226606	0.00200679048826408	0.0290540071821762
Contig2064	ref|XP_012532225.1| PREDICTED: putative glutathione-specific gamma-glutamylcyclotransferase 2 [Monomorium pharaonis]	203.642834429296	0.566722987173685	0.193805163665755	2.92418930669505	0.00345354646987882	0.0448868363969855
Contig10783	#N/A	241.623461338105	0.566804536024849	0.182636165725299	3.10346274394181	0.00191270315258993	0.0279403770821111
Contig23703	#N/A	53.8298600968985	0.567016023362607	0.188711359190205	3.00467351724759	0.00265866061821414	0.0364046446969399
Contig100691	ref|XP_012532589.1| PREDICTED: protein LMBR1L [Monomorium pharaonis]	394.42866239452	0.567072451332709	0.187192629682771	3.02935244989991	0.00245078585369916	0.0341970236406582
Contig6508	ref|XP_011159168.1| PREDICTED: 40S ribosomal protein S3a [Solenopsis invicta]	2880.90777140394	0.567354935791444	0.154447851793193	3.673440123668	0.000239306772651475	0.00517851767542095
Contig87072	ref|XP_011879208.1| PREDICTED: ankyrin repeat domain-containing protein 12 isoform X3 [Vollenhovia emeryi]	707.051746857703	0.567908381242797	0.157795896877826	3.5990060101658	0.000319435807756273	0.0065438017572597
Contig149991	ref|XP_011050790.1| PREDICTED: uncharacterized protein LOC105143914 [Acromyrmex echinatior]	63.6567855897441	0.568164907726155	0.171666271797058	3.30970610463209	0.000933939782374912	0.015723812494971
Contig101298	#N/A	128.675009642065	0.568806122019939	0.159100661007123	3.57513361930328	0.000350049071183638	0.00707053243066695
Contig18773	ref|XP_012229294.1| PREDICTED: JNK-interacting protein 3 isoform X5 [Linepithema humile]	508.158215959589	0.569297652022298	0.177941069058516	3.19936063683581	0.00137732759276039	0.0214744658731441
Contig109493	ref|XP_011163698.1| PREDICTED: presenilins-associated rhomboid-like protein, mitochondrial [Solenopsis invicta]	195.800320187475	0.569570180014362	0.176756322040128	3.22234686397839	0.00127145110777855	0.0201762895542102
Contig95113	ref|XP_011648141.1| PREDICTED: AP-1 complex subunit sigma-2 isoform X3 [Pogonomyrmex barbatus]	335.689546050094	0.570413924736947	0.185488537928827	3.07519769742224	0.00210363062676504	0.0302077259443154
Contig96940	#N/A	187.07370528885	0.5712740605568	0.167614137478168	3.40826895124648	0.000653764234942605	0.0117726175750241
Contig5915	ref|XP_011877205.1| PREDICTED: serine/threonine-protein kinase svkA isoform X1 [Vollenhovia emeryi]	308.885522407409	0.571712439921426	0.139077020260322	4.11076135260377	3.94356629645983e-05	0.00113715245530109
Contig135123	ref|XP_011865463.1| PREDICTED: uncharacterized protein LOC105560719 [Vollenhovia emeryi]	286.386777115154	0.571909841178133	0.186815113474592	3.06136816524705	0.00220327994686086	0.0313926882447562
Contig36412	ref|XP_012215496.1| PREDICTED: cytoplasmic protein NCK1 isoform X2 [Linepithema humile]	184.843081631859	0.571925333370599	0.177398830605549	3.22395210508625	0.00126434544100508	0.0200846834527894
Contig22619	ref|XP_011165714.1| PREDICTED: uncharacterized protein LOC105200043 [Solenopsis invicta]	39.0843786939739	0.572176400462905	0.182737331491019	3.13114127143214	0.00174128375002931	0.0259754102383098
Contig6251	#N/A	835.74721718542	0.572395843876877	0.159362015099799	3.59179597169638	0.00032840692215177	0.00669823677856673
Contig23441	ref|XP_011869470.1| PREDICTED: putative deoxyribonuclease TATDN1 [Vollenhovia emeryi]	2401.7061945994	0.57261288482378	0.132220739370352	4.33073425205921	1.48612951746929e-05	0.000511003976627991
Contig66653	ref|XP_011069199.1| PREDICTED: signal recognition particle subunit SRP68 [Acromyrmex echinatior]	362.705614246985	0.574063086818558	0.186233554014691	3.08249010150595	0.00205276557378149	0.029612142380896
Contig111121	#N/A	76.5882556318434	0.574151364983808	0.144422810900012	3.97548947708343	7.02346496185298e-05	0.0018577729224434
Contig7876	#N/A	115.238428466915	0.57450327535835	0.150312148103007	3.82206816021718	0.000132337096951391	0.0031786686266323
Contig7351	ref|XP_011636482.1| PREDICTED: uncharacterized protein LOC105426790 [Pogonomyrmex barbatus]	728.343987858575	0.57573702688579	0.198238249895911	2.90426810763358	0.00368112782575387	0.0472247206347807
Contig14955	#N/A	815.168905116232	0.575769169927399	0.162906704462599	3.5343491345354	0.000408780723540745	0.00802147142848425
Contig143612	ref|XP_011862245.1| PREDICTED: zinc finger protein 672 [Vollenhovia emeryi]	69.8913036740643	0.576533494397356	0.176982979167878	3.25756463761683	0.0011237266287557	0.0182835108616767
Contig13208	ref|XP_011633615.1| PREDICTED: protein ELYS [Pogonomyrmex barbatus]	194.346869235972	0.576629825282663	0.151406568112249	3.80848620024967	0.000139820147817254	0.00332717485981559
Contig108693	ref|XP_011703533.1| PREDICTED: transmembrane emp24 domain-containing protein 7-like [Wasmannia auropunctata]	54.3610255787509	0.577394308170277	0.190203074404325	3.03567284587041	0.00239999618567762	0.0336510631435572
Contig17600	ref|XP_011692526.1| PREDICTED: 6-pyruvoyl tetrahydrobiopterin synthase isoform X2 [Wasmannia auropunctata]	178.634216397875	0.57814212832711	0.162186217573449	3.56468100050047	0.000364298984722746	0.00730829031275008
Contig37741	ref|XP_011156308.1| PREDICTED: dnaJ homolog subfamily C member 1-like [Solenopsis invicta]	463.500234777075	0.579103851328864	0.167865159216535	3.44981563793031	0.000560969514785505	0.0103862554852961
Contig64728	ref|XP_011165528.1| PREDICTED: multivesicular body subunit 12B [Solenopsis invicta]	286.614599405047	0.579498945926885	0.173648660071594	3.3371921539041	0.000846294163649015	0.0145112323566946
Contig30070	ref|XP_011696698.1| PREDICTED: corepressor interacting with RBPJ 1 isoform X1 [Wasmannia auropunctata]	194.192178038978	0.580251939840447	0.186489062693754	3.11145292629476	0.00186169153326737	0.0273622451059414
Contig15114	ref|XP_011693145.1| PREDICTED: annexin B9-like isoform X3 [Wasmannia auropunctata]	690.075415486981	0.580497503878431	0.179697798752497	3.23040965392106	0.00123612964739696	0.0197358707325279
Contig1480	ref|XP_011169672.1| PREDICTED: mediator of RNA polymerase II transcription subunit 13-like isoform X3 [Solenopsis invicta]	406.3082854112	0.58051520013957	0.161050453127145	3.60455490107357	0.000312688347791147	0.00642790929170057
Contig21080	ref|XP_012549127.1| PREDICTED: elongation factor 1-alpha isoform X1 [Bombyx mori]	9153.77243901348	0.580603912776234	0.13254525990257	4.38042004069417	1.18450753007935e-05	0.000426089666271038
Contig6902	ref|XP_011876845.1| PREDICTED: uncharacterized protein LOC105566982 [Vollenhovia emeryi]	49.648601932677	0.58131079977763	0.199174629542979	2.9185986242901	0.00351608630674972	0.0455686667052329
Contig79533	ref|XP_011690970.1| PREDICTED: E3 ubiquitin-protein ligase UBR5 isoform X6 [Wasmannia auropunctata]	922.267340542353	0.581393977961387	0.137463447630622	4.22944417576118	2.34269400349236e-05	0.000732814347863324
Contig84132	ref|XP_011873189.1| PREDICTED: T-complex protein 1 subunit epsilon [Vollenhovia emeryi]	52.6906884030188	0.58241445479995	0.169687119176477	3.43228441632173	0.00059851951884779	0.0109641531850634
Contig136488	ref|XP_011175572.1| PREDICTED: protein SMG5 [Solenopsis invicta]	890.115345018596	0.583193452668381	0.175464563355263	3.32371073404485	0.000888282814732101	0.0150994717519528
Contig126952	ref|XP_011166167.1| PREDICTED: GTP-binding protein SAR1b isoform X1 [Solenopsis invicta]	575.283896632266	0.583314242278767	0.157641564067241	3.70025662794084	0.000215381549460142	0.00474784678941607
Contig1169	ref|XP_011066774.1| PREDICTED: glomulin [Acromyrmex echinatior]	111.949485930398	0.584382932867412	0.175410503599024	3.33151619131811	0.000863742752924771	0.0147451673835775
Contig105721	ref|XP_011049860.1| PREDICTED: protein FAM46C isoform X2 [Acromyrmex echinatior]	354.852426449563	0.584539010824539	0.197714361066551	2.95648230948576	0.00311170081253746	0.0413715876462211
Contig30761	ref|XP_006613300.1| PREDICTED: LOW QUALITY PROTEIN: protein kinase C iota type-like [Apis dorsata]	172.689611636186	0.584762277211158	0.143720606078465	4.0687434680863	4.72673532926308e-05	0.00132742075987302
Contig44160	#N/A	29.59533731108	0.586533127864889	0.201336999079708	2.91319097108765	0.00357755740037443	0.0461972593142598
Contig63770	ref|XP_011167319.1| PREDICTED: mucin-12 [Solenopsis invicta]	218.042416039823	0.58656955481956	0.201056444093577	2.91743722746114	0.00352920677515386	0.0457168638461855
Contig135793	ref|XP_011869317.1| PREDICTED: protein crumbs isoform X1 [Vollenhovia emeryi]	272.374292110572	0.587272457298095	0.183539271232617	3.19971008577117	0.0013756588794218	0.0214657235385925
Contig49949	ref|XP_011702475.1| PREDICTED: ADP-ribosylation factor GTPase-activating protein 2 isoform X2 [Wasmannia auropunctata]	74.5931054165101	0.587738953779495	0.162032733598329	3.62728530666199	0.000286416754928233	0.0059987832900135
Contig37310	#N/A	74.8571621217897	0.587799827411696	0.203496261219751	2.88850430906415	0.00387078725350799	0.0491832608073861
Contig144607	ref|XP_011162291.1| PREDICTED: islet cell autoantigen 1 isoform X1 [Solenopsis invicta]	186.107317935357	0.589523301881166	0.189937832080106	3.1037697725882	0.00191071951406746	0.0279164313920216
Contig113101	#N/A	39.0008842305019	0.589763227560242	0.204274460467657	2.88711190919346	0.00388795917306397	0.0493533110857016
Contig17888	ref|XP_011869355.1| PREDICTED: conserved oligomeric Golgi complex subunit 8 [Vollenhovia emeryi]	224.86430557568	0.58988331212724	0.162689199167629	3.62582958884348	0.000288035262808758	0.00602337920285997
Contig30285	ref|XP_011685873.1| PREDICTED: eukaryotic peptide chain release factor GTP-binding subunit ERF3A isoform X2 [Wasmannia auropunctata]	907.034814017612	0.590099910489796	0.161298813600544	3.65842684963063	0.000253768148001616	0.00544361177208023
Contig498	#N/A	79.2982164945233	0.590949402399357	0.175535460781505	3.36655283079771	0.00076114001151182	0.0133034207399361
Contig25941	ref|XP_012061257.1| PREDICTED: transmembrane emp24 domain-containing protein eca [Atta cephalotes]	241.52688797928	0.592363251476872	0.117868511507248	5.02562765832879	5.01788637576254e-07	2.66443086516312e-05
Contig4452	ref|XP_011160406.1| PREDICTED: protein disulfide-isomerase A6 [Solenopsis invicta]	2152.33795830415	0.592513427943113	0.196873267372384	3.00961850154281	0.00261576016676036	0.0359288505615876
Contig120403	#N/A	378.732151802534	0.593162350493841	0.180127456947641	3.29301462722731	0.00099119317818644	0.0164972596547099
Contig798	ref|XP_012063409.1| PREDICTED: ATP-binding cassette sub-family G member 1 [Atta cephalotes]	45.8923864662847	0.594386441264891	0.173593595232272	3.42401135519769	0.000617040426078313	0.0112426871345135
Contig85657	ref|XP_011057892.1| PREDICTED: eukaryotic translation initiation factor 2 subunit 2 isoform X2 [Acromyrmex echinatior]	82.972708732885	0.594898216766986	0.159802765529361	3.72270288812795	0.000197101411506753	0.00441375674043539
Contig10481	ref|XP_011696082.1| PREDICTED: annexin B9-like isoform X2 [Wasmannia auropunctata]	1029.61958488783	0.595455697550687	0.146578382799025	4.06237049543056	4.85768978948767e-05	0.00135697838325388
Contig11651	ref|XP_011172040.1| PREDICTED: eukaryotic peptide chain release factor GTP-binding subunit ERF3A [Solenopsis invicta]	701.565440802852	0.596471102892381	0.172504358074727	3.45771613859167	0.000544775056943318	0.0101482313972955
Contig27618	ref|XP_012535584.1| PREDICTED: transmembrane protein 192 [Monomorium pharaonis]	532.581471478753	0.597516919853016	0.203379182040683	2.93794533864086	0.00330395270777633	0.0433748540670261
Contig36550	ref|XP_015435820.1| PREDICTED: calcium release-activated calcium channel protein 1 isoform X2 [Dufourea novaeangliae]	18.1848165725038	0.597621820293487	0.206119544711308	2.89939423808896	0.00373884457323944	0.0478158872081567
Contig103704	ref|XP_011865885.1| PREDICTED: flocculation protein FLO11-like isoform X3 [Vollenhovia emeryi]	634.16336240082	0.597896342967202	0.18539906763756	3.22491558660931	0.00126009817489189	0.0200336405497994
Contig69165	ref|XP_012543319.1| PREDICTED: vigilin [Monomorium pharaonis]	4011.33817749233	0.597937484178499	0.167078970018246	3.57877166775208	0.000345212902943991	0.00699054839776712
Contig18725	ref|XP_011686764.1| PREDICTED: uncharacterized protein LOC105449315 [Wasmannia auropunctata]	107.115749214267	0.599346944897694	0.197485938216458	3.03488415585705	0.00240628092540506	0.0337078175206984
Contig53316	#N/A	324.671076949399	0.599946871676322	0.141745594135136	4.23256098601802	2.31045233530639e-05	0.000725132337422452
Contig6786	ref|XP_011700527.1| PREDICTED: ATP-binding cassette sub-family G member 1-like isoform X1 [Wasmannia auropunctata]	77.6012826481558	0.600310707164979	0.179892098291641	3.33705989793813	0.0008466969869708	0.014516304069666
Contig41484	ref|XP_011170174.1| PREDICTED: CD63 antigen-like [Solenopsis invicta]	1031.42519069495	0.600474979683932	0.178538520976253	3.36327967992857	0.000770222887861468	0.0134379270184543
Contig21905	ref|XP_011167444.1| PREDICTED: translation initiation factor IF-2, mitochondrial isoform X2 [Solenopsis invicta]	268.071779252503	0.600976795796575	0.179653255791933	3.34520403288767	0.000822220605324104	0.0141773416400277
Contig77141	ref|XP_011159872.1| PREDICTED: origin recognition complex subunit 5 [Solenopsis invicta]	90.5003350247499	0.601607510554766	0.176430406337163	3.40988564865105	0.000649901225632226	0.0117139426917715
Contig83276	ref|XP_011638208.1| PREDICTED: angiotensin-converting enzyme [Pogonomyrmex barbatus]	40.2961151781754	0.604443588784171	0.189960079408475	3.18195060070713	0.00146286767419894	0.0225453593857152
Contig83423	ref|XP_011163408.1| PREDICTED: serine/threonine-protein kinase pelle [Solenopsis invicta]	83.5017452335969	0.605900795252031	0.191247294345517	3.16815355388704	0.00153410469761491	0.0234497378789843
Contig115219	#N/A	34.247181181014	0.606111482616788	0.173519695492782	3.49304141466754	0.00047755243966587	0.00911766810542691
Contig29939	#N/A	1264.48899854026	0.607555694584344	0.158132718017558	3.84206192242193	0.00012200504459753	0.00296888428459527
Contig1445	ref|XP_011160263.1| PREDICTED: protein CDV3 homolog isoform X1 [Solenopsis invicta]	53.9598555010041	0.608421306788843	0.205301105957832	2.96355591437394	0.00304106807286653	0.0406196597689079
Contig16933	#N/A	242.757682182635	0.609325693775291	0.147805269810205	4.12248964165972	3.74799469592853e-05	0.00109002906432265
Contig71513	ref|XP_011176132.1| PREDICTED: probable 18S rRNA (guanine-N(7))-methyltransferase [Solenopsis invicta]	156.697012622571	0.609355539925606	0.18553254567917	3.28435928960586	0.0010221452459282	0.0169189802735636
Contig98327	#N/A	137.962967757642	0.609653677354056	0.191332473322526	3.18635758356802	0.00144076401924719	0.0222867311173935
Contig8556	#N/A	915.735578946458	0.609904053607775	0.161213644713955	3.78320367788931	0.000154822619167581	0.00362627196473097
Contig2072	ref|XP_012064589.1| PREDICTED: uncharacterized protein LOC105627927 [Atta cephalotes]	220.35280580987	0.610783701200722	0.151724181311709	4.02561869782576	5.682570674199e-05	0.00155464220175675
Contig8258	#N/A	80.4009249323713	0.611013021257922	0.203609271844215	3.00090961341593	0.00269174451751293	0.0367796716370779
Contig38309	ref|XP_011699064.1| PREDICTED: protein kinase C-binding protein 1 isoform X1 [Wasmannia auropunctata]	99.6923140453848	0.611342069647694	0.152508736494488	4.00857081174356	6.1087322177606e-05	0.00165124498899619
Contig84299	ref|XP_014467733.1| PREDICTED: GRB2-associated-binding protein 2 isoform X2 [Dinoponera quadriceps]	112.907640652589	0.61155818550546	0.198160507274532	3.08617591828328	0.00202748829709373	0.0293128514029982
Contig22812	ref|XP_011635083.1| PREDICTED: EH domain-containing protein 3 isoform X1 [Pogonomyrmex barbatus]	1043.30898100587	0.612387818773805	0.148940167403558	4.11163643394142	3.92864606646217e-05	0.00113405578471094
Contig108692	ref|XP_014475696.1| PREDICTED: transmembrane emp24 domain-containing protein 7 [Dinoponera quadriceps]	123.287928928506	0.612670521874404	0.185253720449314	3.30719685622743	0.000942346442000827	0.0158274641155558
Contig25749	ref|XP_011700493.1| PREDICTED: angiotensin-converting enzyme [Wasmannia auropunctata]	238.674020471492	0.612957558533625	0.206622693717024	2.96655487113671	0.00301156617524213	0.0403079013110344
Contig65025	ref|XP_011692632.1| PREDICTED: threonine--tRNA ligase, cytoplasmic-like isoform X2 [Wasmannia auropunctata]	346.559824985981	0.614154251104024	0.189506997133114	3.24079986699714	0.00119194834179409	0.019163590091768
Contig16802	ref|XP_011163709.1| PREDICTED: lipid phosphate phosphohydrolase 1-like isoform X1 [Solenopsis invicta]	102.901041580559	0.614555683691648	0.211509887287796	2.9055648015898	0.00366590931411224	0.0470606423441894
Contig24261	ref|XP_011859862.1| PREDICTED: protein dopey-1 homolog isoform X1 [Vollenhovia emeryi]	1101.11676851542	0.614700962386462	0.176031837031916	3.49198743108618	0.000479440807394318	0.00915114506037623
Contig92660	#N/A	207.911709085326	0.614912134251772	0.197315915903815	3.11638385294536	0.0018308378603684	0.0270112321144473
Contig24560	#N/A	108.037716828151	0.614956943707702	0.191437179012924	3.21231720441401	0.00131668909102486	0.0207591360334795
Contig147538	ref|XP_011699894.1| PREDICTED: uncharacterized protein LOC105457120 isoform X1 [Wasmannia auropunctata]	71.8152488170829	0.615490235835922	0.211911582024528	2.90446718369873	0.0036787876642689	0.0472125589384085
Contig30580	ref|XP_011684439.1| PREDICTED: protein sly1 homolog [Wasmannia auropunctata]	201.277515663312	0.616043727159281	0.154651517179173	3.98343151361105	6.79272533493588e-05	0.00180448316076786
Contig5372	ref|XP_016911960.1| PREDICTED: ADP-ribosylation factor 2 [Apis cerana]	328.308943961597	0.616269429944419	0.144721418844971	4.25831528506903	2.05973312733166e-05	0.000660663785075581
Contig58331	ref|XP_011873737.1| PREDICTED: histone-lysine N-methyltransferase SETMAR-like [Vollenhovia emeryi]	66.3078136327486	0.616848695704944	0.158115439958377	3.90125528453974	9.56951687059737e-05	0.00241848762744911
Contig125414	ref|XP_011161244.1| PREDICTED: endophilin-B1 isoform X2 [Solenopsis invicta]	71.7408149275762	0.617349528575623	0.20491111570559	3.01276739648723	0.00258877257080986	0.0356456293448886
Contig18966	ref|XP_011641227.1| PREDICTED: eukaryotic translation initiation factor 4 gamma 2 isoform X1 [Pogonomyrmex barbatus]	3971.90914639779	0.617473728278008	0.156135641683634	3.95472629836273	7.6622317520557e-05	0.00200444810343997
Contig8079	#N/A	309.839779710865	0.617524244448353	0.186938591492066	3.30335346767905	0.000955358838744675	0.0160108790852101
Contig743	ref|XP_011173499.1| PREDICTED: peptidyl-prolyl cis-trans isomerase G [Solenopsis invicta]	663.488463398903	0.620669403793263	0.171688776522338	3.61508431922752	0.000300249881867609	0.00622608722373937
Contig17151	ref|XP_012064211.1| PREDICTED: golgi-specific brefeldin A-resistance guanine nucleotide exchange factor 1 [Atta cephalotes]	1475.25877415795	0.622351976308678	0.129087739174784	4.82115482296902	1.42729524548584e-06	6.8541507585452e-05
Contig2979	ref|XP_011869281.1| PREDICTED: MOB kinase activator-like 2 isoform X1 [Vollenhovia emeryi]	409.292477090558	0.622498466277558	0.213679361717152	2.91323626800028	0.00357703845635925	0.0461952664718316
Contig22352	ref|XP_011882784.1| PREDICTED: peptidoglycan-recognition protein SA-like [Vollenhovia emeryi]	1100.9957832793	0.62275247258798	0.205324609259237	3.03301428325969	0.00242124139686898	0.0338719033211255
Contig81058	ref|XP_011875246.1| PREDICTED: ATPase family AAA domain-containing protein 5 [Vollenhovia emeryi]	147.692177093397	0.622841098648509	0.212470570560992	2.9314229119073	0.00337413096012054	0.0440827934514245
Contig90566	ref|XP_011874981.1| PREDICTED: zinc transporter ZIP13 homolog [Vollenhovia emeryi]	6576.64832267064	0.623271798952219	0.205223803772806	3.03703462997019	0.0023891800590283	0.0335202011716392
Contig51586	ref|XP_011689141.1| PREDICTED: uncharacterized protein LOC105450803 isoform X1 [Wasmannia auropunctata]	212.187715777714	0.624078259035618	0.168355788905993	3.70690109969485	0.000209810829445151	0.00465150986175817
Contig104642	#N/A	57.7132844239482	0.624842092683724	0.193701423557236	3.22580020946047	0.00125621014114606	0.0199858848054179
Contig131832	#N/A	267.703306420462	0.62551514363321	0.178567402606227	3.50296378008355	0.000460112023607052	0.00883568846919383
Contig9187	ref|XP_011863864.1| PREDICTED: transport and Golgi organization protein 1-like isoform X1 [Vollenhovia emeryi]	1073.00980462779	0.625636326757477	0.169226101317715	3.69704390685495	0.00021812462773472	0.00479973280311801
Contig45453	ref|XP_011862248.1| PREDICTED: ribosome biogenesis regulatory protein homolog [Vollenhovia emeryi]	94.0534624009642	0.625767923022863	0.157827432945753	3.96488691061678	7.34307518511588e-05	0.00193063939153607
Contig37728	ref|XP_011164565.1| PREDICTED: leucine-rich repeat-containing protein 59 [Solenopsis invicta]	272.942986331581	0.626519270665515	0.147214330144884	4.25583073365828	2.08274235497442e-05	0.000666939838789848
Contig63943	#N/A	94.6537322098345	0.626992106377983	0.166821364169381	3.75846408821697	0.000170959569638951	0.00392492146216636
Contig23975	ref|XP_011877139.1| PREDICTED: cationic amino acid transporter 4 isoform X1 [Vollenhovia emeryi]	172.527596312778	0.627130629861956	0.13762023926052	4.55696511815224	5.18980388317108e-06	0.000213469840404114
Contig30343	ref|XP_011865104.1| PREDICTED: uncharacterized protein LOC105560531 isoform X1 [Vollenhovia emeryi]	446.527355017999	0.62718054192555	0.195484881369149	3.20833272390614	0.00133506947185456	0.0209869144958947
Contig57076	#N/A	32.7331080625578	0.628378819897989	0.20783456305177	3.02345678539264	0.00249904717987785	0.0347202975603919
Contig126957	ref|XP_011863753.1| PREDICTED: coatomer subunit alpha [Vollenhovia emeryi]	740.911419261185	0.628471268665119	0.137243245622402	4.57925099202503	4.66643961321177e-06	0.000194658425624762
Contig1696	#N/A	403.837035923398	0.628808340226151	0.187767203913994	3.34887204537685	0.000811412592496765	0.0140373653933992
Contig129163	ref|XP_011864569.1| PREDICTED: probable Dol-P-Man:Man(7)GlcNAc(2)-PP-Dol alpha-1,6-mannosyltransferase [Vollenhovia emeryi]	617.275095339819	0.628867494183877	0.206827242122416	3.0405447934739	0.00236150561701464	0.0332006243775475
Contig8205	ref|XP_011636482.1| PREDICTED: uncharacterized protein LOC105426790 [Pogonomyrmex barbatus]	617.600042904384	0.629436676717784	0.207867835880287	3.02806191276404	0.00246127655646954	0.0343158382384157
Contig98663	#N/A	54.8585761321382	0.62991708636967	0.213837958882027	2.94576832692829	0.00322153591201828	0.0425358164903561
Contig1049	ref|XP_011876845.1| PREDICTED: uncharacterized protein LOC105566982 [Vollenhovia emeryi]	120.221285115962	0.630184997502392	0.181648408232143	3.46925692129946	0.000521900103871866	0.00980018840854046
Contig31266	ref|XP_011705170.1| PREDICTED: cyclin-dependent kinase 11B-like [Wasmannia auropunctata]	64.39850023945	0.630561999199242	0.188073254659845	3.35274678124593	0.000800138741646292	0.0138741868443447
Contig10488	ref|XP_006557303.1| PREDICTED: stress-activated protein kinase JNK isoform X2 [Apis mellifera]	211.003076522124	0.630656378852807	0.193184919607289	3.26452178635279	0.00109649030084421	0.0179295241300478
Contig132053	ref|XP_011051761.1| PREDICTED: elongation factor 1-alpha [Acromyrmex echinatior]	2279.94939798612	0.630771498896379	0.119805555401736	5.26496034997088	1.40219616752923e-07	8.30019341175507e-06
Contig47571	ref|XP_012057661.1| PREDICTED: LOW QUALITY PROTEIN: transcription factor MafG [Atta cephalotes]	203.640077153788	0.630991186371342	0.159888578246243	3.94644316243501	7.93207403363869e-05	0.00206428763768543
Contig19972	ref|XP_011645333.1| PREDICTED: LOW QUALITY PROTEIN: probable ATP-dependent RNA helicase pitchoune [Pogonomyrmex barbatus]	53.226783147474	0.631913782410141	0.188779786064735	3.34735935230612	0.000815853759081363	0.0141008951883363
Contig23791	#N/A	30.415586554874	0.632898433586063	0.210899941592539	3.00094172054741	0.00269146071895958	0.03677949959099
Contig39362	ref|XP_011879423.1| PREDICTED: GTP-binding protein 2 [Vollenhovia emeryi]	235.489577204279	0.633233455988587	0.18655185437317	3.39440987127308	0.000687766740876697	0.0122712549766086
Contig26006	ref|XP_011159409.1| PREDICTED: UPF0568 protein C14orf166 homolog [Solenopsis invicta]	550.398396083347	0.633426124167588	0.172759581010299	3.66651806205658	0.000245875559691262	0.00529685213722315
Contig2978	ref|XP_015186790.1| PREDICTED: MOB kinase activator-like 2 isoform X3 [Polistes dominula]	182.947293081504	0.633446448345886	0.197989356917536	3.19939646356709	0.00137715642456503	0.0214742659952813
Contig34793	ref|XP_011704580.1| PREDICTED: E3 UFM1-protein ligase 1 homolog [Wasmannia auropunctata]	56.7626485670194	0.633841595092694	0.200247662986157	3.1652883516374	0.00154929329780626	0.02363129696195
Contig3213	ref|XP_011704575.1| PREDICTED: guanine nucleotide-binding protein G(s) subunit alpha isoform X1 [Wasmannia auropunctata]	348.637000016714	0.634504540061938	0.185205956929102	3.42594023746671	0.000612675170728261	0.0111766654026288
Contig43174	ref|XP_012532154.1| PREDICTED: multiple epidermal growth factor-like domains protein 10 isoform X1 [Monomorium pharaonis]	1744.84342221684	0.635171975804123	0.175016721036613	3.62920738111217	0.000284292788964995	0.00596074246794973
Contig87156	ref|XP_011063026.1| PREDICTED: 10 kDa heat shock protein, mitochondrial [Acromyrmex echinatior]	181.310741988897	0.636145249266031	0.205688203181951	3.09276487141706	0.00198301183079679	0.0287773318803291
Contig115842	ref|XP_011057899.1| PREDICTED: eukaryotic translation initiation factor 2 subunit 2 isoform X3 [Acromyrmex echinatior]	991.763448353949	0.636980626514369	0.1542166768813	4.13042635463252	3.62091078557442e-05	0.00105943084201702
Contig4189	#N/A	498.886757515568	0.638695478491846	0.197532970759753	3.23336137777553	0.00122342694550145	0.0195727438318433
Contig148313	ref|XP_011298427.1| PREDICTED: eukaryotic peptide chain release factor GTP-binding subunit ERF3A isoform X2 [Fopius arisanus]	234.0426075926	0.638702993600003	0.166347703276181	3.83956604762728	0.000123251969882159	0.00299439137291279
Contig49816	ref|XP_011176356.1| PREDICTED: protein transport protein Sec24C [Solenopsis invicta]	946.66766033173	0.638772797231436	0.15477244392707	4.12717394016491	3.67248611726723e-05	0.00107128529212105
Contig127004	#N/A	156.352636361505	0.639587047457742	0.158007084258169	4.04783779449229	5.16929484769879e-05	0.00143125510713725
Contig19857	ref|XP_011172970.1| PREDICTED: telomere length regulation protein TEL2 homolog [Solenopsis invicta]	132.482350644276	0.640590422275342	0.197616506088509	3.24158358506973	0.00118867570394121	0.0191268470472572
Contig85000	#N/A	519.77134040274	0.640985840393032	0.171984727366773	3.72699279876213	0.000193777992841231	0.00435082925847197
Contig61099	ref|XP_011878783.1| PREDICTED: E3 ubiquitin-protein ligase RNF19A-like [Vollenhovia emeryi]	38.482450201227	0.641201554039204	0.221846305275855	2.89029629428312	0.00384878880509685	0.0489541966811483
Contig115386	#N/A	62.7998266083691	0.641212797005941	0.197946663356295	3.23932106828084	0.00119814617008366	0.0192404256613055
Contig101517	ref|XP_012215682.1| PREDICTED: serine--tRNA ligase, cytoplasmic [Linepithema humile]	34.0494023900429	0.641774614167538	0.185260519842336	3.46417366589338	0.000531863023956175	0.00994595589227698
Contig126894	ref|XP_011865774.1| PREDICTED: NSFL1 cofactor p47 isoform X1 [Vollenhovia emeryi]	83.5142364123781	0.64179596696128	0.154986315652019	4.14098473314422	3.45817979753713e-05	0.00101929492515366
Contig115390	#N/A	156.298697095579	0.642374197346862	0.120062759845309	5.35032010070822	8.77987936062007e-08	5.39010665283445e-06
Contig97087	ref|XP_011866274.1| PREDICTED: transmembrane and ubiquitin-like domain-containing protein 2 [Vollenhovia emeryi]	93.8415104894812	0.642866373444645	0.132994751902635	4.83377249288217	1.33969685022763e-06	6.49558986938754e-05
Contig140638	ref|XP_011875091.1| PREDICTED: vacuolar protein sorting-associated protein 18 homolog isoform X2 [Vollenhovia emeryi]	436.123605500547	0.642971465477098	0.210343898050989	3.05676309812056	0.00223741030609831	0.0317854767705024
Contig124217	ref|XP_011160814.1| PREDICTED: pre-mRNA-splicing factor Syf2 [Solenopsis invicta]	485.233735319661	0.643333299031815	0.140745186531349	4.57090799967445	4.85615457798132e-06	0.000201580210265797
Contig108695	ref|XP_011647568.1| PREDICTED: transmembrane emp24 domain-containing protein 7-like [Pogonomyrmex barbatus]	411.935988908372	0.643892271566517	0.171250773879204	3.75993787929217	0.000169955554459288	0.00390716266527239
Contig98526	ref|XP_011880951.1| PREDICTED: protein FAM195A-like isoform X1 [Vollenhovia emeryi]	627.863840868211	0.644777591324939	0.165172559356864	3.90366047384338	9.47486767246768e-05	0.00239859007753226
Contig37201	#N/A	88.5270972290591	0.644992114206502	0.169674186324163	3.80135675425749	0.000143905926278823	0.00340646854361604
Contig71921	ref|XP_011066062.1| PREDICTED: U4/U6.U5 tri-snRNP-associated protein 1 [Acromyrmex echinatior]	495.530648360792	0.645505232716656	0.206316232153721	3.12871762913791	0.00175570940744836	0.0261532046992203
Contig4236	ref|XP_011694413.1| PREDICTED: multiple coagulation factor deficiency protein 2 homolog [Wasmannia auropunctata]	271.129417491903	0.646530680134126	0.171068388590887	3.77936967466454	0.000157225857403349	0.00366932483681238
Contig22582	ref|XP_011707766.1| PREDICTED: ceramide synthase 6 [Wasmannia auropunctata]	130.360868852527	0.647022201287906	0.207083341177849	3.12445316754004	0.00178135876141877	0.0264684109861998
Contig69661	ref|XP_011158521.1| PREDICTED: hepatocyte growth factor-regulated tyrosine kinase substrate isoform X1 [Solenopsis invicta]	254.301575620192	0.647036101260475	0.207418848088269	3.11946627427572	0.00181179000602632	0.0268118823523848
Contig105114	ref|XP_011162330.1| PREDICTED: lysine--tRNA ligase isoform X1 [Solenopsis invicta]	842.628985640661	0.64716024353715	0.163587604245469	3.95604695430384	7.62001901366959e-05	0.00199494451451697
Contig106824	ref|XP_011158492.1| PREDICTED: shootin-1 [Solenopsis invicta]	147.081854823303	0.647523577560159	0.187698796379935	3.44980143745545	0.000560999022444538	0.0103862554852961
Contig41047	ref|XP_011635523.1| PREDICTED: phosphomannomutase [Pogonomyrmex barbatus]	117.112915728978	0.647607629408936	0.207502416785028	3.12096427329739	0.00180259901932228	0.0267079278276381
Contig25816	ref|XP_011858509.1| PREDICTED: putative nuclease HARBI1 isoform X3 [Vollenhovia emeryi]	623.874492152357	0.648157694622128	0.221572698435278	2.92525974183347	0.0034416882326273	0.0447886526193802
Contig18469	ref|XP_011056377.1| PREDICTED: F-box/LRR-repeat protein 4-like isoform X6 [Acromyrmex echinatior]	54.8743065182011	0.648336940795919	0.22442253599326	2.88891192645373	0.00386577332186121	0.0491530638418405
Contig79620	ref|XP_011158321.1| PREDICTED: UPF0605 protein GA14893-like isoform X1 [Solenopsis invicta]	66.3640726291025	0.648361631424892	0.195546348333693	3.3156417235595	0.000914329664639895	0.0154473530759281
Contig25364	ref|XP_012060448.1| PREDICTED: threonine--tRNA ligase, cytoplasmic [Atta cephalotes]	648.056194981711	0.648853293184836	0.181238488160021	3.58010762378432	0.000343452719768707	0.00696114140467993
Contig74238	#N/A	112.189802289818	0.649454875798803	0.1670516943671	3.88774791096467	0.000101178627134127	0.00253252830198735
Contig58485	#N/A	57.9017907567358	0.649586489502267	0.18584204229707	3.49536887064498	0.000473407005685469	0.00904871284975746
Contig140915	ref|XP_012061257.1| PREDICTED: transmembrane emp24 domain-containing protein eca [Atta cephalotes]	29.7818789187638	0.649830928202631	0.222896612992448	2.91539166736755	0.00355242413473647	0.0459484614669502
Contig46475	ref|XP_011877931.1| PREDICTED: lateral signaling target protein 2 homolog [Vollenhovia emeryi]	457.376606695082	0.650145982795281	0.170539597502198	3.81228754094428	0.000137686566722567	0.00328331740100477
Contig11982	#N/A	59.4185509535888	0.65048698543104	0.154539251941216	4.20920236936616	2.56273779904551e-05	0.0007882583893848
Contig15491	ref|XP_011641701.1| PREDICTED: cysteine and histidine-rich protein 1 homolog [Pogonomyrmex barbatus]	99.0881083371306	0.650944770454214	0.219541302338588	2.96502190485457	0.00302661378131253	0.0404704398874894
Contig30863	ref|XP_016917373.1| PREDICTED: vacuolar protein sorting-associated protein 29 [Apis cerana]	12780.7425589691	0.651062940400381	0.147216845804515	4.42247581682948	9.75762738193392e-06	0.000363236585169802
Contig71515	ref|XP_011057014.1| PREDICTED: WD repeat-containing protein 89 [Acromyrmex echinatior]	104.865290726485	0.651342741563542	0.207726622187464	3.13557662809215	0.00171516613395248	0.0256705154055658
Contig11133	ref|XP_011691120.1| PREDICTED: protein abrupt-like isoform X2 [Wasmannia auropunctata]	135.035879548302	0.65175703088079	0.195645230705425	3.33132082254596	0.000864349236847698	0.0147536636130728
Contig93026	ref|XP_011883930.1| PREDICTED: zinc finger protein-like 1 [Vollenhovia emeryi]	267.415402899011	0.651878216457941	0.164273813358841	3.96824182217025	7.24048420732192e-05	0.00190699364010828
Contig3712	ref|XP_011689817.1| PREDICTED: glucose-fructose oxidoreductase domain-containing protein 2 [Wasmannia auropunctata]	133.900356938081	0.653675625051861	0.149251828892236	4.37968251312909	1.18852341655992e-05	0.000427194313844042
Contig34857	ref|XP_011875659.1| PREDICTED: protein argonaute-2-like [Vollenhovia emeryi]	238.581345655307	0.654320329814351	0.170538012765623	3.83680048338319	0.000124647658035154	0.00302558931390359
Contig22621	ref|XP_011643118.1| PREDICTED: alaserpin-like isoform X11 [Pogonomyrmex barbatus]	845.616323151875	0.655552272913701	0.205422365127333	3.19124099514359	0.00141663062217962	0.0219763617852094
Contig28418	ref|XP_016768702.1| PREDICTED: uncharacterized protein LOC107964762 [Apis mellifera]	94.6479412645322	0.656016106944714	0.180967956619093	3.62504014081077	0.000288916572662207	0.00603736586905261
Contig66655	ref|XP_011876563.1| PREDICTED: signal recognition particle subunit SRP68 [Vollenhovia emeryi]	645.461126238777	0.656863050173109	0.163372494818388	4.02064650419465	5.80386413554458e-05	0.00158176292378968
Contig4015	ref|XP_011871232.1| PREDICTED: uncharacterized protein LOC105563879 [Vollenhovia emeryi]	299.327893046817	0.657308162789813	0.166296347571389	3.95263138601188	7.72964626426898e-05	0.00201896812111435
Contig61688	ref|XP_012530338.1| PREDICTED: loss of heterozygosity 12 chromosomal region 1 protein homolog [Monomorium pharaonis]	90.9147924542413	0.657624120911929	0.177388103463501	3.70726169383304	0.00020951241275193	0.00464717310156039
Contig13590	ref|XP_011882348.1| PREDICTED: speckle-type POZ protein isoform X2 [Vollenhovia emeryi]	189.978671284482	0.658050727529592	0.166903037107896	3.94271272070494	8.05651378064836e-05	0.00208666168802301
Contig111817	ref|XP_011700190.1| PREDICTED: glutamate--cysteine ligase catalytic subunit [Wasmannia auropunctata]	558.318831631634	0.658270657129895	0.18146445154446	3.62754606495815	0.000286127737904548	0.00599365570716518
Contig35502	ref|XP_011875153.1| PREDICTED: centromere-associated protein E isoform X3 [Vollenhovia emeryi]	269.717990804105	0.65843988276487	0.223843655207033	2.94151684646089	0.00326609076705719	0.0429651404873114
Contig51688	ref|XP_011869355.1| PREDICTED: conserved oligomeric Golgi complex subunit 8 [Vollenhovia emeryi]	102.058662514758	0.659213715781286	0.153593914263313	4.29192601115151	1.77129975548683e-05	0.000584459963602411
Contig897	ref|XP_012062939.1| PREDICTED: CREB-binding protein [Atta cephalotes]	54.4178428386438	0.660702969523028	0.172367538939902	3.83310554636039	0.000126535629437947	0.00306373912704833
Contig77351	ref|XP_011707265.1| PREDICTED: CSC1-like protein 2 isoform X1 [Wasmannia auropunctata]	345.629963545341	0.661065983565551	0.131733034798082	5.01822481034328	5.21511288059719e-07	2.76158656067672e-05
Contig26721	ref|XP_011865093.1| PREDICTED: XK-related protein 6 [Vollenhovia emeryi]	263.115005026058	0.66113958489454	0.165145337919084	4.00338025417635	6.24438141778831e-05	0.00168121012823495
Contig64603	#N/A	2144.99169100018	0.662161746255759	0.187700179952674	3.5277629804229	0.000419087234187759	0.00819171175801943
Contig31971	ref|XP_011693895.1| PREDICTED: integrator complex subunit 8 [Wasmannia auropunctata]	182.704509980921	0.663504655755649	0.201224934775335	3.2973282187739	0.000976093626127737	0.0163019656420797
Contig35499	ref|XP_011687562.1| PREDICTED: dihydropyrimidine dehydrogenase [NADP(+)] [Wasmannia auropunctata]	581.0753227859	0.663808649021795	0.146954513195904	4.51710284077411	6.26914625060902e-06	0.000251231666103838
Contig61199	ref|XP_011860897.1| PREDICTED: vitellogenin-2-like isoform X2 [Vollenhovia emeryi]	67.6981359605541	0.665014587603906	0.180673933198054	3.68074450936383	0.000232553935351563	0.00505652868186098
Contig111281	ref|XP_011692236.1| PREDICTED: J domain-containing protein isoform X2 [Wasmannia auropunctata]	37.332995366773	0.665306349829804	0.214129197972244	3.10703237171813	0.00188975703754215	0.0276937011983187
Contig108390	ref|XP_011864693.1| PREDICTED: coatomer subunit beta' [Vollenhovia emeryi]	593.026793405637	0.665460961288351	0.1949760773857	3.41303902617727	0.000642427416425768	0.0116054551287018
Contig10266	ref|XP_011877510.1| PREDICTED: SID1 transmembrane family member 1-like [Vollenhovia emeryi]	131.307249890701	0.665480892467486	0.214053547555864	3.10894586922839	0.00187756113807849	0.0275447399588248
Contig23211	#N/A	170.201791396782	0.665486286311234	0.159944832459696	4.16072389509007	3.17240434060442e-05	0.000948880551933673
Contig60242	ref|XP_011061075.1| PREDICTED: hydroxysteroid dehydrogenase-like protein 2 [Acromyrmex echinatior]	264.735421024005	0.666202728480069	0.200686930599437	3.3196119273446	0.000901426610394335	0.0152807585427522
Contig13398	ref|XP_011641392.1| PREDICTED: transmembrane protein 145-like [Pogonomyrmex barbatus]	130.390738953396	0.666683749448819	0.209835789194964	3.17716892817262	0.00148720382287903	0.0228564890339887
Contig17410	ref|XP_012543609.1| PREDICTED: cytochrome P450 9e2-like [Monomorium pharaonis]	74.5644186931306	0.666890600123959	0.184771346506338	3.60927499167781	0.000307053977706122	0.00633775647477662
Contig18895	ref|XP_011052978.1| PREDICTED: coatomer subunit alpha [Acromyrmex echinatior]	698.205371541808	0.666994958818416	0.149725276597998	4.45479196281101	8.39745818569717e-06	0.000320255323776123
Contig41499	#N/A	61.2480747500768	0.66722716634843	0.221926944048816	3.00651716360166	0.00264259134883689	0.0362281400586481
Contig123317	ref|XP_011640401.1| PREDICTED: transcription factor MafG [Pogonomyrmex barbatus]	114.952685351815	0.668426086650132	0.150295980351794	4.4473982942562	8.69165887947181e-06	0.000330078585068801
Contig9162	ref|XP_011879602.1| PREDICTED: calcyclin-binding protein [Vollenhovia emeryi]	166.767751129095	0.670008309853207	0.176042596672549	3.80594425734056	0.000141264198839517	0.00335506183212298
Contig136261	#N/A	87.533939245439	0.670266545860077	0.185063679050701	3.62181574092909	0.00029254246713536	0.00609695007501071
Contig36939	ref|XP_011864693.1| PREDICTED: coatomer subunit beta' [Vollenhovia emeryi]	1298.19059349872	0.670723440230009	0.168032114792353	3.9916383904283	6.56183776767914e-05	0.00175103712519882
Contig21097	ref|XP_011701847.1| PREDICTED: uncharacterized protein LOC105458325 [Wasmannia auropunctata]	159.583099898123	0.671000325584097	0.147261773606307	4.55651394894893	5.20095867257256e-06	0.000213863799097106
Contig60032	#N/A	85.7002941027907	0.671197629289034	0.184588682986041	3.63617973990199	0.000276711289743379	0.00583491562587241
Contig126334	#N/A	13.9769012821069	0.671552224815312	0.232470709670084	2.88876059168212	0.00386763413879287	0.0491570136924327
Contig39361	ref|XP_011879423.1| PREDICTED: GTP-binding protein 2 [Vollenhovia emeryi]	225.506462528213	0.672266091573294	0.167363391960375	4.01680489203074	5.89925257800333e-05	0.0016035703329592
Contig31765	#N/A	43.6999754125548	0.672852567037142	0.211325052363958	3.18396971636998	0.00145270209508419	0.0224151486998234
Contig122671	ref|XP_011863462.1| PREDICTED: eukaryotic translation initiation factor 3 subunit F [Vollenhovia emeryi]	798.971014997702	0.6729173278082	0.159503653635649	4.21882077601389	2.45583387094265e-05	0.000762117745020633
Contig4852	ref|XP_011169036.1| PREDICTED: protein ariadne-2 isoform X2 [Solenopsis invicta]	256.839547159806	0.673565464452649	0.185506279014979	3.63095776611561	0.000282371393933717	0.00592778857847169
Contig4873	ref|XP_011056074.1| PREDICTED: fibroblast growth factor receptor homolog 1-like isoform X1 [Acromyrmex echinatior]	139.750853650103	0.674053221700007	0.231604981198866	2.91035718753059	0.00361015912041055	0.0465122666687589
Contig111416	ref|XP_011162391.1| PREDICTED: multiple epidermal growth factor-like domains protein 11, partial [Solenopsis invicta]	36.5037935183369	0.674230082632133	0.232216533993444	2.90345425038154	0.00369070889275327	0.0473315882304232
Contig92859	ref|XP_011167441.1| PREDICTED: UPF0676 protein C1494.01-like [Solenopsis invicta]	75.5756068373044	0.674434186833079	0.230198338339688	2.92979606932637	0.00339184521789462	0.0442545408292824
Contig63788	ref|XP_011059393.1| PREDICTED: disks large homolog 5 isoform X2 [Acromyrmex echinatior]	406.504881455209	0.674623113021247	0.187546926506036	3.597089675578	0.000321797564929767	0.00658422676077028
Contig111912	ref|XP_011705370.1| PREDICTED: phosphatidylinositol 5-phosphate 4-kinase type-2 alpha isoform X2 [Wasmannia auropunctata]	164.968808388569	0.674816472734829	0.222736674791384	3.02966035282185	0.00244828898180391	0.0341727317803989
Contig141	#N/A	113.746503296896	0.675245888021866	0.190420060477205	3.5460858815487	0.000390998757336703	0.00772957805793871
Contig27172	ref|XP_011164878.1| PREDICTED: protein Asterix [Solenopsis invicta]	135.436883350642	0.676436156183571	0.197777925469567	3.42018025812318	0.000625796536811666	0.0113640561787865
Contig28400	ref|NP_001292916.1| fucosyltransferase 8 (alpha (1,6) fucosyltransferase) [Atta cephalotes]	657.117402124029	0.676788542309708	0.171717301916002	3.94129499333019	8.10428834038929e-05	0.00209617016795513
Contig103820	#N/A	254.372263027021	0.676831192490562	0.199217720255497	3.39744472340375	0.000680183280831737	0.0121595538421718
Contig92580	#N/A	825.68139496065	0.678645568328526	0.18548442628283	3.65877384925953	0.000253424846374359	0.00543882847226022
Contig90595	ref|XP_011170717.1| PREDICTED: histidine--tRNA ligase, cytoplasmic isoform X2 [Solenopsis invicta]	34.1673930195581	0.678904296579072	0.221437487029977	3.06589595865115	0.00217018816075787	0.030999357197495
Contig18758	ref|XP_011704951.1| PREDICTED: uncharacterized protein LOC105460210 isoform X1 [Wasmannia auropunctata]	312.651607680116	0.679034885498245	0.172993612996443	3.92520205651875	8.66569680642783e-05	0.00222531680876142
Contig25391	#N/A	1981.72638121664	0.679128519081821	0.168330810995764	4.03448729952896	5.47216496520615e-05	0.00150466784183185
Contig75750	ref|XP_011694148.1| PREDICTED: zinc finger protein 888-like isoform X1 [Wasmannia auropunctata]	110.892026007379	0.679364052499525	0.192836605721074	3.52300358098079	0.000426685595197452	0.00830790241308073
Contig111264	ref|XP_012537337.1| PREDICTED: iron/zinc purple acid phosphatase-like protein [Monomorium pharaonis]	334.261826797165	0.679505013469827	0.200344021650017	3.39169099169259	0.000694627317030352	0.0123558747339656
Contig102476	#N/A	33.9359893343482	0.68048448480684	0.205378238925953	3.31332320486097	0.00092194373310501	0.0155544666185715
Contig53448	#N/A	122.622505753027	0.680658231612665	0.22412665838282	3.03693561722616	0.00238996497225992	0.0335277448792859
Contig107796	ref|XP_011155382.1| PREDICTED: tumor suppressor candidate 3, partial [Solenopsis invicta]	228.32472752499	0.681663671935983	0.176594513981197	3.86005010330369	0.000113363778577979	0.00278812395140987
Contig145842	ref|XP_011069049.1| PREDICTED: uncharacterized protein LOC105154931 [Acromyrmex echinatior]	188.632035167574	0.682412379167997	0.209254268649686	3.26116348102045	0.00110956048888271	0.0180920928386846
Contig27653	#N/A	348.707676264651	0.683353593645313	0.180794676011854	3.77972188517603	0.000157003628069372	0.00366595902496554
Contig101127	#N/A	50.6263166582663	0.683961230770469	0.187849888013651	3.64099887416896	0.000271582324168386	0.00575427222414724
Contig23428	ref|XP_012531780.1| PREDICTED: sushi, von Willebrand factor type A, EGF and pentraxin domain-containing protein 1 [Monomorium pharaonis]	176.093057176549	0.68446793908496	0.181231188961176	3.77676680823184	0.000158877352780583	0.0036995180837888
Contig7100	ref|XP_011880831.1| PREDICTED: voltage-dependent L-type calcium channel subunit beta-2 isoform X10 [Vollenhovia emeryi]	311.215638110267	0.684580096691003	0.198082184627445	3.45604072359445	0.0005481724957564	0.0101947154195705
Contig992	#N/A	900.100044227029	0.684963065804527	0.160927480934291	4.25634616181066	2.07794899076798e-05	0.000665876593653142
Contig57387	#N/A	167.219265375351	0.685252999833135	0.155288138917386	4.41278390359029	1.02049842915074e-05	0.000376274806881044
Contig110062	ref|XP_011642236.1| PREDICTED: signal peptidase complex subunit 1 [Pogonomyrmex barbatus]	67.0032000732993	0.685824722730684	0.16775587098749	4.08823082431389	4.34675532459335e-05	0.00123632734184019
Contig619	#N/A	1298.17814706359	0.686101297753978	0.166804349063698	4.11320988694351	3.90195320423982e-05	0.00112865153462039
Contig26120	ref|XP_011872545.1| PREDICTED: open rectifier potassium channel protein 1 [Vollenhovia emeryi]	213.754466075307	0.686361937816092	0.180825606185479	3.79571208024635	0.000147220278985174	0.00347824580388422
Contig46311	ref|NP_001299175.1| calmodulin [Papilio xuthus]	4144.34606764852	0.686680500519119	0.130934876208788	5.24444304223529	1.56755119920295e-07	9.1828029515641e-06
Contig29609	#N/A	5355.72463655181	0.687320802454724	0.221325617963871	3.10547332377458	0.0018997475587829	0.0277950550692399
Contig87094	ref|XP_011050168.1| PREDICTED: probable beta-hexosaminidase fdl isoform X5 [Acromyrmex echinatior]	29.3597316418296	0.688270557624931	0.217835837315013	3.15958368516574	0.00157994719682228	0.024012435184339
Contig145550	ref|XP_011864896.1| PREDICTED: signal recognition particle subunit SRP72 [Vollenhovia emeryi]	555.92444425394	0.688538215720487	0.195495657894443	3.52201283208172	0.000428283412005101	0.00833183569583413
Contig18849	#N/A	84.5248337152194	0.689151562047761	0.227605662819031	3.02783135319311	0.00246315508266465	0.0343378200432241
Contig66557	ref|XP_012225335.1| PREDICTED: uncharacterized protein LOC105673920 isoform X3 [Linepithema humile]	51.9537114958663	0.689853992686465	0.224175186937345	3.07729861681468	0.0020888592814663	0.0300207201472687
Contig24037	ref|XP_012223694.1| PREDICTED: Golgi SNAP receptor complex member 1 isoform X2 [Linepithema humile]	200.493836810863	0.690655449973349	0.197282584156558	3.50084348766064	0.000463788135049304	0.00889332615686463
Contig18737	ref|XP_011689829.1| PREDICTED: E3 ubiquitin-protein ligase TRIP12 isoform X3 [Wasmannia auropunctata]	110.193504153348	0.690666098278267	0.229629812908104	3.00773705962416	0.0026320075616453	0.0361016560599743
Contig96032	#N/A	122.064063094639	0.692584926874452	0.192136019304805	3.60465949789318	0.000312562448722125	0.00642752991896697
Contig33313	ref|XP_011056192.1| PREDICTED: putative elongator complex protein 1 isoform X5 [Acromyrmex echinatior]	65.1795393167683	0.693222869515732	0.193592658238276	3.58083243354459	0.000342501266480461	0.00694289488078943
Contig20931	ref|XP_015597471.1| PREDICTED: leukotriene A-4 hydrolase [Cephus cinctus]	52.3066602322377	0.693453280523839	0.180167990957886	3.8489260874643	0.000118636794569879	0.00289631674273791
Contig7884	#N/A	50.143695964745	0.693518430555958	0.197717658602533	3.50762008541746	0.000452134239893036	0.00870962113762134
Contig110000	#N/A	226.419391147938	0.693560131107642	0.157776282165404	4.39584531710889	1.10342493084022e-05	0.000401699612506703
Contig129217	ref|XP_012529338.1| PREDICTED: uncharacterized protein LOC105832704 [Monomorium pharaonis]	113.928318594205	0.693649640710838	0.23204515454785	2.98928733100437	0.00279629034439377	0.0379595714479096
Contig37054	ref|XP_011868899.1| PREDICTED: protein sel-1 homolog 1 [Vollenhovia emeryi]	4618.39635719768	0.694326401612341	0.170454861848241	4.07337399522527	4.63369257209431e-05	0.00130643156854885
Contig127744	ref|XP_011703981.1| PREDICTED: kinesin-like protein KIF23 [Wasmannia auropunctata]	66.6933067556675	0.69445968454819	0.223553015817796	3.10646529194757	0.00189338533890229	0.0277229064294855
Contig99513	ref|XP_011635770.1| PREDICTED: pro-neuregulin-2, membrane-bound isoform-like [Pogonomyrmex barbatus]	53.4251030580662	0.694738547782275	0.143332618944799	4.84703728221025	1.25318884054266e-06	6.11110936430608e-05
Contig81886	ref|XP_011874138.1| PREDICTED: methyltransferase-like protein 6 [Vollenhovia emeryi]	149.533748622724	0.694846710728203	0.226531638818044	3.06732743538011	0.00215982126548039	0.0308838044176358
Contig23571	ref|XP_012541769.1| PREDICTED: ras-like GTP-binding protein RhoL isoform X1 [Monomorium pharaonis]	125.426764538171	0.695101067492368	0.204868560886384	3.39291233601166	0.000691537655823459	0.0123106048381258
Contig11470	ref|XP_011694117.1| PREDICTED: signal peptidase complex subunit 3 [Wasmannia auropunctata]	844.888682315587	0.695501984530731	0.178235067417363	3.90216131207285	9.53375847109654e-05	0.00241079828696492
Contig71588	ref|XP_011162291.1| PREDICTED: islet cell autoantigen 1 isoform X1 [Solenopsis invicta]	219.671300679822	0.695747076758551	0.147990729014672	4.70128825900691	2.58525252864575e-06	0.000116477221401915
Contig42563	ref|XP_011170426.1| PREDICTED: ER membrane protein complex subunit 8/9 homolog [Solenopsis invicta]	557.563321800175	0.696360332837561	0.162902535005001	4.27470531883486	1.91390262095485e-05	0.000623592179607651
Contig23166	ref|XP_011700018.1| PREDICTED: cysteine--tRNA ligase, cytoplasmic [Wasmannia auropunctata]	1230.28029160764	0.697066861893135	0.180425436025516	3.86346225481508	0.000111791173834877	0.0027569463990622
Contig3061	#N/A	42.8424566230567	0.697255405503033	0.239346485546975	2.91316333268737	0.00357787407330859	0.0461972593142598
Contig137004	#N/A	47.3557890533681	0.697286589003259	0.21598731884959	3.22836818715657	0.00124498620109061	0.0198399011368628
Contig126652	ref|XP_011859863.1| PREDICTED: protein dopey-1 homolog isoform X2 [Vollenhovia emeryi]	114.049734469874	0.697301995868705	0.212592060297128	3.28000017918884	0.00103807020709734	0.0171386478043948
Contig2227	#N/A	134.34581799546	0.698323307974274	0.213320498936813	3.27358744918894	0.0010619152616085	0.0174642949657743
Contig140583	ref|XP_011638208.1| PREDICTED: angiotensin-converting enzyme [Pogonomyrmex barbatus]	206.113868941283	0.699057736361562	0.222625880578316	3.14005601929846	0.00168915530818715	0.0253680075265218
Contig138185	ref|XP_012062298.1| PREDICTED: transport and Golgi organization protein 1 [Atta cephalotes]	150.06736988783	0.699208810813819	0.209777361130686	3.33309946814627	0.000858842318364618	0.0146772202712485
Contig12129	ref|XP_011868839.1| PREDICTED: UPF0676 protein C1494.01 [Vollenhovia emeryi]	221.590552415509	0.699607840297056	0.227642486980554	3.07327445582169	0.00211723666384811	0.0303677348419986
Contig29303	ref|XP_011051558.1| PREDICTED: transcription factor Dp-1 [Acromyrmex echinatior]	129.992909054407	0.69975293769977	0.184514591464072	3.7923989216648	0.000149198985724341	0.00351397555575214
Contig126601	#N/A	522.84113761882	0.699870491632226	0.168942691515119	4.14265029967035	3.43315229975996e-05	0.00101345998254168
Contig126925	ref|XP_011161215.1| PREDICTED: bifunctional heparan sulfate N-deacetylase/N-sulfotransferase [Solenopsis invicta]	495.104260483614	0.699932456854066	0.236605488099918	2.95822578958306	0.00309415392489372	0.0411827058956264
Contig15213	ref|XP_011692395.1| PREDICTED: mannose-1-phosphate guanyltransferase beta isoform X1 [Wasmannia auropunctata]	517.470577257644	0.699986143343972	0.167123066456856	4.18844722146526	2.80869611110897e-05	0.00085269423418834
Contig107737	ref|XP_011701763.1| PREDICTED: alpha-1,3/1,6-mannosyltransferase ALG2, partial [Wasmannia auropunctata]	291.884585786255	0.70017233435766	0.16458578129357	4.25414837694133	2.09846125308443e-05	0.000671814741208196
Contig99	#N/A	439.310279167481	0.700428297636546	0.162195875619046	4.31841003948621	1.57157254801846e-05	0.000532020068714368
Contig77536	ref|XP_011165857.1| PREDICTED: solute carrier family 52, riboflavin transporter, member 3-B-like [Solenopsis invicta]	111.095208070664	0.700883520224774	0.214090373212044	3.27377410627703	0.00106121409593135	0.0174551470044288
Contig64085	#N/A	189.623255756731	0.701146770201675	0.175078582212879	4.00475467267119	6.20818761543281e-05	0.00167279387100994
Contig93526	#N/A	53.0099278722094	0.701592284756071	0.178628999360838	3.92765053416006	8.57797307612875e-05	0.00220404175965541
Contig76352	ref|XP_012061822.1| PREDICTED: thyroid transcription factor 1-associated protein 26 homolog [Atta cephalotes]	60.0060143175354	0.701744025542069	0.191384974469155	3.66666206419024	0.000245737200836316	0.00529563082062865
Contig13386	ref|XP_011878005.1| PREDICTED: major facilitator superfamily domain-containing protein 1-like [Vollenhovia emeryi]	47.3516916461659	0.702217547937528	0.228194956506347	3.07727023720613	0.0020890581800535	0.0300207201472687
Contig120446	ref|XP_011691403.1| PREDICTED: mitochondrial cardiolipin hydrolase [Wasmannia auropunctata]	33.3600245204485	0.702429773518696	0.229802990501941	3.05666071613965	0.00223817458350256	0.0317896740644235
Contig1424	ref|XP_015524655.1| PREDICTED: potassium voltage-gated channel protein Shaker, partial [Neodiprion lecontei]	100.767655999163	0.70427735417492	0.201174740097795	3.50082397935524	0.000463822084945761	0.00889332615686463
Contig38988	ref|XP_011861402.1| PREDICTED: nuclear protein localization protein 4 homolog [Vollenhovia emeryi]	344.937957887581	0.704751964193075	0.199829303686214	3.52676985403366	0.000420662246145793	0.00821894393442092
Contig146567	ref|XP_011873541.1| PREDICTED: 26S proteasome non-ATPase regulatory subunit 11 [Vollenhovia emeryi]	578.996942047318	0.705600839092653	0.176454833864596	3.99876174338244	6.36747380599561e-05	0.00170790860903143
Contig66064	#N/A	24.9813889500145	0.70689174559336	0.223749106287128	3.15930533678305	0.00158145708768465	0.0240326895438443
Contig33239	ref|XP_011059414.1| PREDICTED: rap1 GTPase-activating protein 1-like isoform X5 [Acromyrmex echinatior]	29.1608282830539	0.707383248890118	0.226346392867814	3.12522430743232	0.00177669524342961	0.026416483800292
Contig70694	ref|XP_011061164.1| PREDICTED: tetratricopeptide repeat protein 7B isoform X2 [Acromyrmex echinatior]	718.159983613258	0.707453149727977	0.164155605742679	4.30964965544302	1.63513375985276e-05	0.000548064828741159
Contig94571	ref|XP_011867178.1| PREDICTED: polyadenylate-binding protein 1-B-like, partial [Vollenhovia emeryi]	1021.39732503164	0.707704196855582	0.182254503933858	3.88305463832277	0.000103152377479847	0.00257622587837054
Contig1934	ref|XP_011639443.1| PREDICTED: caspase Nc isoform X2 [Pogonomyrmex barbatus]	290.934843036064	0.709287792534935	0.189965342859565	3.73377470783861	0.000188631240811538	0.00425499618952361
Contig14640	ref|XP_014479279.1| PREDICTED: TP53-regulated inhibitor of apoptosis 1-like isoform X2 [Dinoponera quadriceps]	45.9566889485826	0.709525752906663	0.207899192976273	3.41283553220738	0.000642907293454662	0.0116125772102505
Contig13974	ref|XP_011647846.1| PREDICTED: RNA-binding protein 4.1 isoform X4 [Pogonomyrmex barbatus]	480.570202014664	0.709598775628985	0.242447630156598	2.92681258699313	0.00342455174955977	0.0446060039085694
Contig58964	ref|XP_011171352.1| PREDICTED: staphylococcal nuclease domain-containing protein 1 [Solenopsis invicta]	2314.63787103893	0.710290705551879	0.174383755455542	4.07314720167821	4.63820887191404e-05	0.00130743308658439
Contig80879	ref|XP_011701942.1| PREDICTED: pre-mRNA-splicing factor SYF2 [Wasmannia auropunctata]	67.3786013245834	0.710322090109557	0.18908088850411	3.75671013463699	0.000172161714789549	0.00394450731364586
Contig42771	ref|XP_011703583.1| PREDICTED: ubiquinone biosynthesis protein COQ9, mitochondrial [Wasmannia auropunctata]	74.6037586431318	0.710387700826237	0.226730277090985	3.13318410730458	0.00172920940594349	0.0258337656638838
Contig69917	ref|XP_012063077.1| PREDICTED: zinc finger protein 622 [Atta cephalotes]	213.927745476713	0.710803487340396	0.215496170647306	3.29845066483218	0.000972199624425466	0.016246935288581
Contig26812	#N/A	25.9345148521001	0.710995350986903	0.228383514500629	3.11316406764965	0.00185093090972822	0.0272424728013764
Contig8591	ref|XP_011883734.1| PREDICTED: putative nuclease HARBI1 [Vollenhovia emeryi]	42.5648048956311	0.71263859707634	0.228323296767849	3.12118214463645	0.00180126584290625	0.0266969252480753
Contig58760	#N/A	18.7970458092529	0.713081552821406	0.217637958296121	3.27645764738877	0.001051180770714	0.017317156102965
Contig29107	ref|XP_003699411.2| PREDICTED: longitudinals lacking protein-like isoform X1 [Megachile rotundata]	285.660098304936	0.713166162406299	0.235964215850669	3.02234879062184	0.00250821358862156	0.0348013993868759
Contig100766	ref|XP_012059059.1| PREDICTED: glutamate--cysteine ligase catalytic subunit [Atta cephalotes]	61.270692137109	0.713973378275979	0.220198404853435	3.24240940233515	0.00118523625314712	0.0190850901489307
Contig36495	ref|XP_012055165.1| PREDICTED: E3 ubiquitin-protein ligase TRIP12 [Atta cephalotes]	843.071852506652	0.714227681441242	0.191943398242674	3.72103280435956	0.000198409659815364	0.00443938749483595
Contig121985	#N/A	44.1371706926711	0.714254769640674	0.201418970933177	3.54611467992077	0.000390956028706738	0.00772957805793871
Contig112272	ref|XP_011634340.1| PREDICTED: uncharacterized protein LOC105425321 [Pogonomyrmex barbatus]	28.52093513089	0.714675206024195	0.236657465054194	3.01987180442644	0.00252881696298559	0.0350156201366477
Contig92096	ref|XP_011648093.1| PREDICTED: G-protein-signaling modulator 2 [Pogonomyrmex barbatus]	159.533338989359	0.714709575296229	0.190282004857275	3.75605447205746	0.000172613138528615	0.00395217932946472
Contig19093	#N/A	49.3841786410437	0.714795177351996	0.19431081914474	3.67861748768375	0.000234501662044022	0.00509234722120705
Contig2435	ref|XP_011876928.1| PREDICTED: putative elongator complex protein 1 [Vollenhovia emeryi]	41.469800579502	0.714979142550084	0.237156086636074	3.01480410092637	0.00257145284478815	0.0354647621369978
Contig27202	ref|XP_011864586.1| PREDICTED: polyadenylate-binding protein 4-like [Vollenhovia emeryi]	993.093482085715	0.715885566809146	0.159198545795861	4.49680971161081	6.89806714480326e-06	0.000272892204718597
Contig67985	#N/A	117.5953311497	0.716568417148692	0.170985592519649	4.19081167359961	2.77958305160089e-05	0.000844612090432004
Contig125458	ref|XP_012063198.1| PREDICTED: uncharacterized protein LOC105626508 [Atta cephalotes]	922.087477175797	0.717314364069341	0.196922221434238	3.64262782963215	0.000269868885914879	0.00572828284464867
Contig6430	ref|XP_011868531.1| PREDICTED: AN1-type zinc finger protein 5 [Vollenhovia emeryi]	642.695182469976	0.718604191697452	0.182132272515496	3.9455071952518	7.9631240620801e-05	0.00206879522328531
Contig31177	ref|XP_011688981.1| PREDICTED: EH domain-containing protein 3 isoform X1 [Wasmannia auropunctata]	304.190672021595	0.718972663564602	0.182109508187819	3.94802375075929	7.87989885981475e-05	0.00205346772477886
Contig31099	ref|XP_011687511.1| PREDICTED: ubiquitin-like modifier-activating enzyme 5 [Wasmannia auropunctata]	235.958144913095	0.719218755567785	0.216286238528663	3.32530983228724	0.00088320327548645	0.0150281968634654
Contig10738	ref|XP_011170023.1| PREDICTED: transmembrane emp24 domain-containing protein bai isoform X2 [Solenopsis invicta]	580.229925871376	0.719733545811801	0.165250082845246	4.35542018145806	1.32811906694415e-05	0.000467945189116698
Contig69099	ref|XP_011860618.1| PREDICTED: myosin heavy chain 95F [Vollenhovia emeryi]	376.50195819982	0.720262449494779	0.188649032998069	3.81800234036796	0.00013453664969122	0.00322066252625333
Contig104986	ref|XP_011165269.1| PREDICTED: coiled-coil domain-containing protein 137 [Solenopsis invicta]	106.315025500358	0.721075621648161	0.23869246638912	3.02094000936189	0.00251991280817381	0.0349345715226325
Contig114023	ref|XP_012233776.1| PREDICTED: serine protease inhibitor 3/4-like isoform X2 [Linepithema humile]	287.722730269565	0.722004312122591	0.211917081426117	3.40701328681855	0.000656779297210217	0.0118174960344787
Contig84446	ref|XP_015116657.1| PREDICTED: heat shock 70 kDa protein cognate 4 [Diachasma alloeum]	20.3019743821916	0.723843542492154	0.216306298696428	3.34638217589781	0.000818734663544077	0.0141351855712115
Contig9343	ref|XP_011708245.1| PREDICTED: FAS-associated factor 1 isoform X3 [Wasmannia auropunctata]	731.257978922283	0.724232633095635	0.19971838091811	3.62626929863101	0.000287545480181183	0.0060149919403503
Contig113710	#N/A	19.2298496143087	0.724233245106536	0.238340892440147	3.03864451329269	0.00237645094402872	0.0333715015707702
Contig11361	ref|XP_012062036.1| PREDICTED: ABC transporter G family member 23-like, partial [Atta cephalotes]	135.25318717462	0.724380089059134	0.213298168775677	3.39609145834232	0.000683555153356276	0.0122101749956873
Contig18272	ref|XP_011883269.1| PREDICTED: rap1 GTPase-GDP dissociation stimulator 1 [Vollenhovia emeryi]	85.5259449842271	0.725196431710428	0.209379670822807	3.4635474822393	0.000533102498449337	0.00996775985450275
Contig26159	ref|XP_011648297.1| PREDICTED: solute carrier family 41 member 1-like isoform X1 [Pogonomyrmex barbatus]	147.139322570138	0.725318261256952	0.238233776690865	3.0445651801849	0.00233016931738442	0.0328259018009871
Contig9011	ref|XP_011166214.1| PREDICTED: syndecan [Solenopsis invicta]	103.343334999925	0.725377502691663	0.226551219201707	3.20182564122875	0.00136559627924593	0.0213578565117816
Contig40828	ref|XP_012522762.1| PREDICTED: probable 39S ribosomal protein L24, mitochondrial [Monomorium pharaonis]	130.697130223676	0.726686426033719	0.234082034949149	3.10440921359719	0.00190659430222109	0.0278651664728322
Contig123287	ref|XP_011063032.1| PREDICTED: RNA-binding protein 33-like [Acromyrmex echinatior]	111.505364347302	0.727361958727197	0.227205486974339	3.20133975817822	0.0013679013486933	0.0213889742305654
Contig12505	#N/A	510.971580584069	0.727604385232902	0.150306894949789	4.84079180450082	1.29322805348543e-06	6.29504053285619e-05
Contig17286	ref|XP_011883269.1| PREDICTED: rap1 GTPase-GDP dissociation stimulator 1 [Vollenhovia emeryi]	221.065044120466	0.728011659815199	0.184104555641644	3.95433810574605	7.67468172074371e-05	0.00200693074985912
Contig35233	ref|XP_011068053.1| PREDICTED: uncharacterized protein LOC105154309 isoform X2 [Acromyrmex echinatior]	69.8829663393818	0.728192287839417	0.222152137901795	3.27789907725904	0.00104582780178661	0.0172436342263209
Contig14824	ref|XP_011062648.1| PREDICTED: serine/threonine-protein kinase minibrain [Acromyrmex echinatior]	391.739425785424	0.728555060494289	0.200073438954116	3.64143818541236	0.000271119227426218	0.00574942344146663
Contig98227	#N/A	131.311618845356	0.728880862565289	0.235267729076843	3.09809112123161	0.00194771531625131	0.0283561422327542
Contig15691	ref|XP_011645946.1| PREDICTED: uncharacterized protein LOC105432711 isoform X1 [Pogonomyrmex barbatus]	316.05987379221	0.729043881746118	0.230686739358549	3.1603198509516	0.00157596028637123	0.0239706458362436
Contig112346	ref|XP_011865151.1| PREDICTED: tetraspanin-1 isoform X2 [Vollenhovia emeryi]	35.7395576878018	0.72955049396449	0.22701074145474	3.21372675711005	0.00131024294787328	0.0206781435043509
Contig22647	ref|XP_011641858.1| PREDICTED: protein CDV3 homolog [Pogonomyrmex barbatus]	368.097176995943	0.729561870488157	0.187332592602636	3.89447378244363	9.84121346288793e-05	0.00247424234808321
Contig89886	#N/A	38.35496192903	0.729653954748825	0.244643771007149	2.98251597310239	0.00285889729813697	0.0386546857616697
Contig146189	ref|XP_012064594.1| PREDICTED: AP-2 complex subunit mu [Atta cephalotes]	161.018835297913	0.730077484128487	0.241246308590063	3.02627421905579	0.00247587650672808	0.0344665715011092
Contig25338	#N/A	31.3611451558339	0.732661470442085	0.246718260365933	2.9696280662623	0.00298160503267939	0.0399987520923714
Contig135763	ref|XP_011874201.1| PREDICTED: fibroblast growth factor receptor homolog 1-like isoform X1 [Vollenhovia emeryi]	340.486619498082	0.733727616577077	0.200117389344484	3.66648605091501	0.00024590632627871	0.00529685213722315
Contig104123	ref|XP_012063768.1| PREDICTED: golgin subfamily A member 5 [Atta cephalotes]	363.929235956683	0.734824021473005	0.221826745269128	3.31260335890287	0.000924319649589422	0.0155831284136524
Contig111280	ref|XP_011156574.1| PREDICTED: J domain-containing protein [Solenopsis invicta]	1279.05732476402	0.735653614257707	0.228957907917298	3.21305178296542	0.00131332608587446	0.0207219783373798
Contig97301	ref|XP_011640690.1| PREDICTED: E3 ubiquitin-protein ligase CBL isoform X1 [Pogonomyrmex barbatus]	85.4310943135448	0.735865591840766	0.246674159185931	2.98314827247918	0.00285299744167593	0.0385980042952354
Contig2940	#N/A	165.804931503848	0.736819731922776	0.191262586298153	3.85239866397171	0.000116966387525493	0.00286235157011713
Contig3801	ref|XP_011874779.1| PREDICTED: protein-methionine sulfoxide oxidase mical3b isoform X4 [Vollenhovia emeryi]	257.536565543852	0.7369934010328	0.215004526509214	3.42780411649248	0.000608484340595828	0.0111091808515835
Contig129125	#N/A	219.724587668009	0.737083821594506	0.231255941225703	3.18730761115936	0.00143603957933151	0.0222212541660729
Contig41992	#N/A	70.7295628969122	0.737720224293187	0.217940127380095	3.38496739063834	0.000711867108963193	0.0125964439085249
Contig136571	ref|XP_011630489.1| PREDICTED: nucleobindin-2 isoform X2 [Pogonomyrmex barbatus]	366.882856515374	0.739343587135406	0.248435162187123	2.976002191584	0.00292032775032962	0.0393128179008538
Contig123934	#N/A	208.779101141101	0.739614508441515	0.2287150261983	3.23378188453721	0.00122162714373426	0.0195526665254783
Contig52944	ref|XP_011871265.1| PREDICTED: uncharacterized protein LOC105563895 isoform X1 [Vollenhovia emeryi]	53.5020002432771	0.739725039204997	0.226792704641506	3.26167916368514	0.00110754418551565	0.0180657321595524
Contig51622	ref|XP_011875497.1| PREDICTED: PC4 and SFRS1-interacting protein [Vollenhovia emeryi]	633.905866940582	0.739871243009805	0.188494768925494	3.92515530922904	8.6673798793926e-05	0.00222532763151069
Contig121374	ref|XP_011159169.1| PREDICTED: rhomboid-related protein 4-like [Solenopsis invicta]	218.624382327471	0.739911198454062	0.174859155091994	4.23146959657211	2.32169380783969e-05	0.000727986552731494
Contig1738	ref|XP_011703957.1| PREDICTED: protein THEM6 [Wasmannia auropunctata]	164.603429879923	0.740596195684606	0.193903115152611	3.81941360303429	0.000133769302118354	0.00320455575648798
Contig105739	ref|XP_011873085.1| PREDICTED: extensin-2 [Vollenhovia emeryi]	60.1864502612789	0.741261024684562	0.254439123764179	2.91331385566153	0.00357614973251997	0.0461881876024727
Contig14926	ref|XP_011690250.1| PREDICTED: carboxypeptidase D-like [Wasmannia auropunctata]	278.739439131057	0.742484606887601	0.194278845036953	3.82174707053861	0.000132509562160732	0.00318074168511274
Contig72478	ref|XP_011695643.1| PREDICTED: dnaJ homolog subfamily B member 12 [Wasmannia auropunctata]	481.942430163625	0.743446101629894	0.18998299870861	3.91322437630416	9.10718389241201e-05	0.00231718881122995
Contig36533	ref|XP_011064570.1| PREDICTED: myosin-I heavy chain-like isoform X2 [Acromyrmex echinatior]	347.253386966343	0.743460482351234	0.228549020825002	3.25295851046544	0.00114210171720925	0.0185269117556957
Contig45424	#N/A	466.582028083779	0.74380947126537	0.16402303798931	4.53478657866249	5.76617613353111e-06	0.00023454535398101
Contig86023	#N/A	280.100623588219	0.745232242244582	0.166746474900711	4.46925335416134	7.84931129277175e-06	0.000303010675109009
Contig30198	ref|XP_012063849.1| PREDICTED: polyadenylate-binding protein 4-like [Atta cephalotes]	941.678263708108	0.74556200491848	0.151167530895331	4.93202475758308	8.13815988083287e-07	4.14223162845389e-05
Contig78207	ref|XP_011160160.1| PREDICTED: protein jagunal [Solenopsis invicta]	341.49315892972	0.746739382850968	0.160706702424541	4.64659763149329	3.3745446067405e-06	0.000147719655357813
Contig61537	#N/A	569.919213330625	0.747297726524354	0.145115989518571	5.14965807009653	2.60961763513494e-07	1.45878271216484e-05
Contig12526	ref|XP_012542554.1| PREDICTED: 26S proteasome non-ATPase regulatory subunit 11 [Monomorium pharaonis]	724.951335305242	0.747989684684067	0.162183977212234	4.61198262332195	3.98846344008002e-06	0.00017068207035753
Contig7308	ref|XP_011635938.1| PREDICTED: uncharacterized protein F21D5.5 isoform X2 [Pogonomyrmex barbatus]	291.800141271346	0.748341540788843	0.23043090796696	3.24757450027556	0.00116393188343557	0.0188135230560466
Contig21419	ref|XP_012524672.1| PREDICTED: inositol polyphosphate 1-phosphatase isoform X2 [Monomorium pharaonis]	104.320357359368	0.749196260958112	0.23587591303754	3.1762304650364	0.00149202366935243	0.0229098775075244
Contig134055	#N/A	229.762802356033	0.749325827513702	0.203427399305281	3.68350492643913	0.00023004883579491	0.00501170165742826
Contig106653	ref|XP_011866575.1| PREDICTED: probable phospholipid-transporting ATPase IIB isoform X3 [Vollenhovia emeryi]	55.9280383784783	0.749381768937773	0.177509887266817	4.22163396347253	2.42537740564171e-05	0.000754596365431184
Contig23713	ref|XP_012524902.1| PREDICTED: nardilysin isoform X3 [Monomorium pharaonis]	332.870369757022	0.749421931866606	0.20721473755293	3.61664397386396	0.000298447349049761	0.00619336477337939
Contig59063	ref|XP_011874491.1| PREDICTED: aspartate--tRNA ligase, cytoplasmic [Vollenhovia emeryi]	304.813480546629	0.750238616789275	0.142345297052785	5.27055429524354	1.36012383326031e-07	8.07582458510346e-06
Contig2345	ref|XP_011687530.1| PREDICTED: cytoplasmic tRNA 2-thiolation protein 1 [Wasmannia auropunctata]	1009.32998389991	0.751356073071277	0.163583913640773	4.59309266020642	4.36725028174578e-06	0.000184389875376299
Contig139375	ref|XP_011693871.1| PREDICTED: ESF1 homolog [Wasmannia auropunctata]	411.733391775771	0.75273459270739	0.216482985346885	3.47710741101078	0.000506854722344721	0.00958669404686988
Contig21176	#N/A	167.350457309647	0.752745120426357	0.194606566228136	3.86803557051573	0.000109715663167341	0.00271217279343343
Contig58965	ref|XP_011171352.1| PREDICTED: staphylococcal nuclease domain-containing protein 1 [Solenopsis invicta]	179.665844136198	0.752977078658403	0.162218708337664	4.64174007039346	3.454873048323e-06	0.000150943670610591
Contig109620	ref|XP_011170072.1| PREDICTED: uncharacterized protein LOC105203040 [Solenopsis invicta]	234.941964408446	0.753166548132249	0.2158804591099	3.48881298121025	0.000485170467279923	0.00923970056869814
Contig64926	ref|XP_011860547.1| PREDICTED: 40S ribosomal protein S3a [Vollenhovia emeryi]	179.300315591285	0.753342895925307	0.20403215844342	3.69227528480133	0.000222256697906031	0.00487011146062829
Contig71374	ref|XP_011062411.1| PREDICTED: zinc finger protein 598 [Acromyrmex echinatior]	27.6437384507629	0.753983935919261	0.260558954296597	2.89371723169028	0.00380710842288311	0.0485241730884276
Contig114026	#N/A	264.33213446371	0.755143065714668	0.243274713355306	3.10407545157303	0.00190874647234766	0.0278906092124723
Contig83208	ref|XP_011689807.1| PREDICTED: glycine-rich cell wall structural protein 1.8 isoform X5 [Wasmannia auropunctata]	132.198362653737	0.75525208682848	0.226590829664947	3.33310967590898	0.000858810807910633	0.0146772202712485
Contig17872	ref|XP_011634177.1| PREDICTED: arrestin homolog [Pogonomyrmex barbatus]	137.73644229111	0.755430505827331	0.193064749170907	3.91283498966764	9.12188688496406e-05	0.00232049440633561
Contig13674	#N/A	158.953663897416	0.755748028041489	0.17615891118975	4.2901492915532	1.78553047653401e-05	0.000587868244828072
Contig141787	ref|XP_011877210.1| PREDICTED: serine/threonine-protein kinase 26 isoform X5 [Vollenhovia emeryi]	148.958533914277	0.756719781545592	0.202397291262112	3.73878413503871	0.00018491241827137	0.00418642949773848
Contig94579	ref|XP_012059442.1| PREDICTED: uncharacterized protein LOC105622637 [Atta cephalotes]	533.136414630371	0.757602531012862	0.183660963173711	4.12500576018597	3.70725478475036e-05	0.00107933802142365
Contig15239	#N/A	36.2436276552859	0.758003927316132	0.233280043367682	3.2493303600832	0.00115677050691693	0.018720080611579
Contig36896	ref|XP_015597471.1| PREDICTED: leukotriene A-4 hydrolase [Cephus cinctus]	61.6077486666449	0.758833664301207	0.261651748173776	2.90016661305556	0.00372964354067166	0.0477342279279584
Contig28558	ref|XP_011693869.1| PREDICTED: Golgi SNAP receptor complex member 2 [Wasmannia auropunctata]	221.573788802551	0.759130338679149	0.155104878633728	4.89430342466401	9.86545299268241e-07	4.93687653929753e-05
Contig132425	#N/A	147.408697777565	0.759937522051255	0.170020169120593	4.46969042544735	7.83328916266655e-06	0.000302754661208498
Contig31350	ref|XP_012541291.1| PREDICTED: vacuolar protein sorting-associated protein 54 [Monomorium pharaonis]	263.952234961266	0.759952524764972	0.217929462900924	3.48714907405826	0.000488199150464817	0.00928955234897372
Contig44611	ref|XP_011632519.1| PREDICTED: lysine--tRNA ligase isoform X2 [Pogonomyrmex barbatus]	301.025383115205	0.760568174346471	0.190656552309423	3.98920553809302	6.62949595931477e-05	0.00176596437836675
Contig34710	ref|XP_011163775.1| PREDICTED: aftiphilin isoform X3 [Solenopsis invicta]	219.899675181118	0.761216301952901	0.236140737290039	3.2235704465424	0.00126603153847162	0.0201020490643122
Contig110926	ref|XP_012060443.1| PREDICTED: 17-beta-hydroxysteroid dehydrogenase 13-like [Atta cephalotes]	90.5351331177563	0.761960636540026	0.215794506461048	3.53095474502992	0.000414062584535837	0.00810360997940258
Contig3578	ref|XP_012537812.1| PREDICTED: transmembrane and coiled-coil domain-containing protein 1 [Monomorium pharaonis]	729.836224029315	0.762743961679617	0.196465269804684	3.8823348393225	0.000103458283221138	0.00258101391110218
Contig9428	ref|XP_012063429.1| PREDICTED: heat shock 70 kDa protein cognate 4 isoform X1 [Atta cephalotes]	475.82926578508	0.765001240603936	0.210250307862317	3.63852613764019	0.00027420280268428	0.00579668571835167
Contig107795	ref|XP_011698342.1| PREDICTED: polyprenol reductase-like [Wasmannia auropunctata]	38.8482084524854	0.765473074412774	0.155702351881398	4.91625890786706	8.82137163361594e-07	4.45715906378984e-05
Contig118423	ref|XP_011067619.1| PREDICTED: uncharacterized protein LOC105154060 [Acromyrmex echinatior]	132.230995285996	0.766249595723661	0.21736796784683	3.52512655527794	0.000423280520611017	0.00825345284286736
Contig11526	ref|XP_011875495.1| PREDICTED: bone morphogenetic protein receptor type-2 isoform X1 [Vollenhovia emeryi]	1336.4567075036	0.766493203415826	0.165889596405155	4.62050194843929	3.82812748575438e-06	0.000164547600904309
Contig60036	ref|XP_011155346.1| PREDICTED: uncharacterized protein LOC105192798 isoform X1 [Solenopsis invicta]	53.5003679960106	0.766897480330247	0.238865638858702	3.21058099438026	0.00132466931942967	0.0208596963638104
Contig5914	ref|XP_011050458.1| PREDICTED: mitochondrial folate transporter/carrier [Acromyrmex echinatior]	1868.45068042334	0.767716363766667	0.233681416996245	3.28531200142031	0.00101869498842023	0.0168742276975231
Contig12707	ref|XP_011692558.1| PREDICTED: uncharacterized protein LOC105452799 isoform X2 [Wasmannia auropunctata]	186.336070216259	0.768515155260856	0.159934724004049	4.8051801136156	1.5461225427074e-06	7.3673880009389e-05
Contig5967	ref|XP_011866739.1| PREDICTED: transmembrane protein 64 [Vollenhovia emeryi]	280.00474558732	0.76875967283716	0.180721958698032	4.25382548073021	2.1014910859437e-05	0.000672625943188977
Contig108221	ref|XP_011635183.1| PREDICTED: staphylococcal nuclease domain-containing protein 1 [Pogonomyrmex barbatus]	734.030278491358	0.769169597450828	0.184415989724431	4.17084005893513	3.03478814362807e-05	0.000911336933813059
Contig18479	ref|XP_014233653.1| PREDICTED: calcium/calmodulin-dependent protein kinase type 1 isoform X2 [Trichogramma pretiosum]	121.536103765091	0.769530663583508	0.243634398050544	3.15854686259803	0.00158557814835661	0.0240818227137679
Contig54986	ref|XP_011703771.1| PREDICTED: uncharacterized protein LOC105459442 [Wasmannia auropunctata]	62.1518624735354	0.770049774460513	0.239549708417955	3.21457195479848	0.00130639168376318	0.0206269649321062
Contig117232	ref|XP_011879004.1| PREDICTED: 227 kDa spindle- and centromere-associated protein isoform X1 [Vollenhovia emeryi]	552.878365450356	0.770456164351047	0.170772811546611	4.51158564043878	6.4344793740958e-06	0.000256950967561433
Contig4687	ref|XP_011169503.1| PREDICTED: LOW QUALITY PROTEIN: rap1 GTPase-activating protein 1-like, partial [Solenopsis invicta]	409.340030208344	0.770814609700768	0.151310329824751	5.09426296666945	3.50100545823731e-07	1.91754989585377e-05
Contig89583	ref|XP_014279549.1| PREDICTED: piggyBac transposable element-derived protein 4-like [Halyomorpha halys]	74.1318373321782	0.771027959750404	0.226523843558397	3.40373864242524	0.000664703210703396	0.0119283866089387
Contig6716	ref|XP_011159413.1| PREDICTED: zinc transporter 7 [Solenopsis invicta]	771.519072679454	0.774239597265539	0.192027916655405	4.03191166550494	5.53249831564165e-05	0.00151910149134932
Contig3448	ref|XP_011869814.1| PREDICTED: leukotriene A-4 hydrolase-like [Vollenhovia emeryi]	33.3887142844563	0.774294186546252	0.259733323560366	2.98111222669622	0.00287203520332691	0.0387936436318701
Contig122319	ref|XP_011870313.1| PREDICTED: LOW QUALITY PROTEIN: uncharacterized protein LOC105563373 [Vollenhovia emeryi]	109.527458069092	0.774918797699114	0.126328950138039	6.13413470825463	8.56239438539891e-10	7.13694254567602e-08
Contig64943	ref|XP_012532465.1| PREDICTED: uncharacterized protein LOC105834486 [Monomorium pharaonis]	1125.12848786916	0.774956973000978	0.259431651321594	2.98713348603842	0.00281606733828448	0.038185997001711
Contig6101	ref|XP_011872738.1| PREDICTED: transmembrane 9 superfamily member 3 isoform X1 [Vollenhovia emeryi]	738.470258744957	0.775039148603888	0.171164372162913	4.52804014533006	5.95332730441072e-06	0.000240498817116579
Contig108219	ref|XP_011635183.1| PREDICTED: staphylococcal nuclease domain-containing protein 1 [Pogonomyrmex barbatus]	536.303040837218	0.775093451923531	0.167073449078726	4.63923774960977	3.49696575617363e-06	0.000152292072594005
Contig65204	ref|XP_003699040.1| PREDICTED: ubiquitin, partial [Apis florea]	1250.38006792585	0.775763382588131	0.223570421520887	3.46988379460409	0.000520683584207361	0.00978411855184939
Contig13185	#N/A	780.287270618348	0.776376618744304	0.179205250165953	4.33233188215936	1.47538314783163e-05	0.000508870256820789
Contig16704	ref|XP_012062813.1| PREDICTED: mucin-17-like [Atta cephalotes]	58.2254864502395	0.776696148763186	0.240282029032095	3.23243545050737	0.00122739862317951	0.019612273208218
Contig14158	ref|XP_011873085.1| PREDICTED: extensin-2 [Vollenhovia emeryi]	296.207699853468	0.777130132969612	0.214505093922838	3.6228982666918	0.000291320421302405	0.00607428161354618
Contig63731	#N/A	118.391593341122	0.777224512520971	0.185303576579805	4.19433087513151	2.73678254889662e-05	0.000834036019294531
Contig14951	ref|XP_011068258.1| PREDICTED: hypoxia up-regulated protein 1 isoform X1 [Acromyrmex echinatior]	1525.30241286192	0.777363661797368	0.21344439847559	3.64199607649234	0.000270532197382348	0.00573787197619795
Contig110042	ref|XP_011865850.1| PREDICTED: DNA polymerase eta [Vollenhovia emeryi]	127.268734244935	0.777439360110029	0.195529700710562	3.97606786736125	7.00641377389185e-05	0.00185398594640501
Contig31449	ref|XP_011874894.1| PREDICTED: tubulin-specific chaperone cofactor E-like protein isoform X1 [Vollenhovia emeryi]	746.440610683145	0.777608807845609	0.254769479021389	3.05220551077206	0.00227166512819361	0.0321642926179628
Contig49674	ref|XP_011875911.1| PREDICTED: alpha-(1,6)-fucosyltransferase [Vollenhovia emeryi]	539.01369939251	0.777855361525308	0.21896287851698	3.55245312261908	0.000381657015000757	0.0075891425381399
Contig7375	ref|XP_011640599.1| PREDICTED: prolactin regulatory element-binding protein [Pogonomyrmex barbatus]	699.396273199578	0.778064911542218	0.186022585640461	4.18263679576005	2.8814753136975e-05	0.000872056222253455
Contig4038	#N/A	241.517995087631	0.778320131970307	0.195721940703463	3.97666265301106	6.98892009169048e-05	0.00184971781677305
Contig138471	ref|XP_011873240.1| PREDICTED: transcriptional protein SWT1-like [Vollenhovia emeryi]	21.2579547591364	0.779770863213576	0.227388271609643	3.42924838512431	0.000605255342858233	0.0110606519426461
Contig7327	ref|XP_011640599.1| PREDICTED: prolactin regulatory element-binding protein [Pogonomyrmex barbatus]	528.353094600131	0.779805956427498	0.204749022489395	3.8085942826315	0.000139759056589824	0.00332630479122015
Contig8546	#N/A	41.1963658414846	0.779843830845232	0.236412661577074	3.29865509589465	0.000971491960565349	0.0162391113940724
Contig5572	ref|XP_011872752.1| PREDICTED: lipid phosphate phosphohydrolase 1-like isoform X3 [Vollenhovia emeryi]	615.894661554863	0.780425647412779	0.206018895119314	3.78812655490072	0.000151787531470951	0.00356503538152088
Contig137313	ref|XP_011061081.1| PREDICTED: uncharacterized protein LOC105149999 isoform X1 [Acromyrmex echinatior]	39.0740456101386	0.781355876620193	0.268407953634371	2.9110757190324	0.00360186718652864	0.0464319027218532
Contig52896	#N/A	176.617393796583	0.781859034348647	0.142836520424853	5.47380342242368	4.40477670976399e-08	2.84994937365427e-06
Contig142588	#N/A	213.980470163841	0.781861702644891	0.168806047166862	4.63171619599643	3.62647041169546e-06	0.000157275394439293
Contig140701	ref|XP_011685513.1| PREDICTED: protein SYS1 homolog [Wasmannia auropunctata]	296.498882667928	0.782010570518932	0.159276652424604	4.90976272174674	9.11866594716142e-07	4.59197461477292e-05
Contig18583	#N/A	75.8089733780999	0.782645326720881	0.239148152966576	3.27263797362577	0.00106548854680167	0.0175145653073892
Contig822	#N/A	187.940146493176	0.782671922010709	0.180569628420961	4.33446050066665	1.46118020231242e-05	0.000505501254990806
Contig47680	#N/A	179.448796653761	0.783023198526923	0.189370273397677	4.13487916808662	3.55141444441149e-05	0.00104269651107257
Contig2977	ref|XP_015186792.1| PREDICTED: MOB kinase activator-like 2 isoform X4 [Polistes dominula]	384.523619730761	0.783041554029856	0.209538555236098	3.73698078211699	0.000186243152329568	0.0042109334544885
Contig42401	ref|XP_011689564.1| PREDICTED: AN1-type zinc finger protein 2A [Wasmannia auropunctata]	118.001223933445	0.78386005509307	0.219861143079328	3.56525052182707	0.000363508797525773	0.00729675578266136
Contig18171	ref|XP_011052663.1| PREDICTED: peptidoglycan-recognition protein LC-like [Acromyrmex echinatior]	156.423060040367	0.783886026968387	0.175660895972612	4.46249589373952	8.10104814692922e-06	0.00031051880819606
Contig11665	#N/A	880.656943599936	0.783913192323767	0.130013488528203	6.02947587360305	1.64492269648928e-09	1.31296215711603e-07
Contig112297	ref|XP_011648338.1| PREDICTED: protein arginine N-methyltransferase 1 isoform X1 [Pogonomyrmex barbatus]	47.4950091734691	0.784111356479262	0.221758344893962	3.53588207403965	0.000406416071172452	0.00798562124417568
Contig121601	ref|XP_011161907.1| PREDICTED: zinc finger protein 622 [Solenopsis invicta]	90.5378581525891	0.784641403868153	0.248454116324728	3.15809379806222	0.00158804452381737	0.0241138808703358
Contig39995	ref|XP_011059902.1| PREDICTED: homocysteine-responsive endoplasmic reticulum-resident ubiquitin-like domain member 2 protein [Acromyrmex echinatior]	65.8726605327062	0.785150455723555	0.199183645571448	3.94184197940045	8.08582437003756e-05	0.00209225526830428
Contig38307	ref|XP_012540961.1| PREDICTED: tetraspanin-7-like [Monomorium pharaonis]	402.318189932093	0.785771021951774	0.24914842925258	3.1538269147793	0.00161144628978358	0.0244079501392978
Contig113659	ref|XP_012063455.1| PREDICTED: leucine-rich repeat-containing protein 59 [Atta cephalotes]	234.004716278821	0.786284160439691	0.163501180459284	4.80904271290871	1.51654802128023e-06	7.23663417867337e-05
Contig97413	ref|XP_011176199.1| PREDICTED: uncharacterized protein C7orf50 homolog [Solenopsis invicta]	144.416902455639	0.786553843550264	0.215280277912316	3.6536270353136	0.000258561771171638	0.00553069338102058
Contig44501	ref|XP_011873085.1| PREDICTED: extensin-2 [Vollenhovia emeryi]	112.610335424163	0.787337890089078	0.214120321355651	3.6770815824684	0.000235917606091982	0.0051177874094292
Contig39729	ref|XP_011690032.1| PREDICTED: general transcription factor IIE subunit 1 [Wasmannia auropunctata]	210.723797657329	0.78833569640071	0.182869830271536	4.31091173010956	1.62582801085164e-05	0.00054541125375788
Contig116486	ref|XP_011882400.1| PREDICTED: metal transporter CNNM4 [Vollenhovia emeryi]	480.436074771957	0.789095196704679	0.253459239818277	3.11330215174021	0.00185006505548239	0.0272328826704947
Contig65024	ref|XP_012229353.1| PREDICTED: threonine--tRNA ligase, cytoplasmic isoform X1 [Linepithema humile]	31.96517212875	0.789989438781857	0.251383172449529	3.14257088525075	0.00167471157453314	0.025196752520571
Contig58963	ref|XP_011635183.1| PREDICTED: staphylococcal nuclease domain-containing protein 1 [Pogonomyrmex barbatus]	618.978356770531	0.790427761635593	0.188491710562516	4.19343513450389	2.74761669639824e-05	0.000836744350045153
Contig14510	ref|XP_011687361.1| PREDICTED: vacuolar protein sorting-associated protein 18 homolog isoform X1 [Wasmannia auropunctata]	95.5431922841726	0.79051252005436	0.25913125214727	3.05062594150201	0.00228364883570018	0.0323002454322741
Contig111354	ref|XP_012062040.1| PREDICTED: hypoxia up-regulated protein 1-like, partial [Atta cephalotes]	147.821741293365	0.790543186153181	0.217586469615978	3.63323688071424	0.000279887846101622	0.00588374216349386
Contig134622	ref|XP_011156576.1| PREDICTED: guanine nucleotide exchange factor for Rab-3A-like [Solenopsis invicta]	2006.48237416979	0.791771223457871	0.241238405821638	3.28211099207509	0.00103033040600442	0.0170274467072732
Contig149337	ref|XP_015176374.1| PREDICTED: protein canopy 4 [Polistes dominula]	156.942579654294	0.791864418937792	0.26708987486142	2.96478636394828	0.00302893192098889	0.0404894601806789
Contig101264	ref|XP_011867681.1| PREDICTED: synaptosomal-associated protein 29 [Vollenhovia emeryi]	603.532501710885	0.792395818098972	0.198201947208819	3.99792145969246	6.39011454861353e-05	0.0017126264711377
Contig6544	ref|XP_012539365.1| PREDICTED: uncharacterized protein LOC105838383 [Monomorium pharaonis]	85.5597011203334	0.792438355244426	0.235692267445064	3.36217375238724	0.000773314471161942	0.013488394687094
Contig16150	ref|XP_011879089.1| PREDICTED: uncharacterized protein LOC105568228 [Vollenhovia emeryi]	22234.4668538727	0.792850748108212	0.242293044433367	3.27228026690735	0.00106683763341476	0.0175346162668658
Contig110315	ref|XP_011882736.1| PREDICTED: dnaJ homolog subfamily B member 12-like [Vollenhovia emeryi]	28.8069837830078	0.792901710219259	0.274073659034312	2.89302413450829	0.00381551977354602	0.0486176734538823
Contig5595	ref|XP_011702789.1| PREDICTED: transcription factor kayak isoform X3 [Wasmannia auropunctata]	57.8374051969912	0.793082752633477	0.212748855889243	3.72778856703396	0.000193167325938753	0.00433927343711413
Contig15769	ref|XP_011050615.1| PREDICTED: zinc finger RNA-binding protein-like [Acromyrmex echinatior]	91.209119526844	0.793140695513254	0.247581719837683	3.20355111852864	0.00135743939426784	0.0212621605468052
Contig2223	ref|XP_011157689.1| PREDICTED: WD repeat-containing protein 55 homolog [Solenopsis invicta]	215.571232917267	0.793341970714244	0.235162716834753	3.3735873670473	0.000741954971413575	0.0130302358836157
Contig132029	ref|XP_011689567.1| PREDICTED: G-protein coupled receptor Mth2-like isoform X1 [Wasmannia auropunctata]	150.386172831328	0.793754796315578	0.270918611044334	2.92986440929924	0.00339109938157764	0.0442490668270249
Contig110718	#N/A	1343.84408013619	0.794549056375107	0.258803393442455	3.07008747376326	0.00213996085228805	0.0306385822447415
Contig4536	ref|XP_012541676.1| PREDICTED: UPF0693 protein C10orf32 homolog isoform X2 [Monomorium pharaonis]	92.6941735105471	0.794842528546844	0.217092735008584	3.66130413583585	0.000250934661169357	0.00539050421983545
Contig8336	ref|XP_012538577.1| PREDICTED: fasciclin-2 isoform X4 [Monomorium pharaonis]	344.327487581265	0.795191290274012	0.220987127782652	3.59836022239317	0.00032022988041974	0.0065570972373913
Contig13777	ref|XP_011690662.1| PREDICTED: serine/threonine-protein kinase N isoform X4 [Wasmannia auropunctata]	814.861188133384	0.79533461577959	0.151259180264106	5.2580915379212	1.45558065981956e-07	8.59369245105658e-06
Contig31427	ref|XP_011869814.1| PREDICTED: leukotriene A-4 hydrolase-like [Vollenhovia emeryi]	57.3613182439787	0.795391838126721	0.212859447006367	3.73669972985944	0.000186451356053338	0.00421423569996956
Contig102246	#N/A	235.907358485255	0.796369803184308	0.236777537570551	3.36336719840673	0.000769978723502374	0.0134353956007528
Contig109564	#N/A	51.5930591941466	0.796399644330892	0.190597405843587	4.178439054855	2.93516624113099e-05	0.000885144840170641
Contig35497	ref|XP_012536572.1| PREDICTED: dihydropyrimidine dehydrogenase [NADP(+)] [Monomorium pharaonis]	75.9429477616278	0.796830384601903	0.193942358477446	4.10859386705133	3.98075406700453e-05	0.00114568332352027
Contig123576	ref|XP_011686138.1| PREDICTED: flocculation protein FLO11 [Wasmannia auropunctata]	38.5652541375132	0.797753950190095	0.233997489716477	3.4092414886873	0.000651437859237085	0.0117354003510332
Contig99484	ref|XP_011878218.1| PREDICTED: choline-phosphate cytidylyltransferase A-like isoform X2 [Vollenhovia emeryi]	34.376403931722	0.79824538137029	0.217543811469993	3.66935458184889	0.000243163610741937	0.00525436422994854
Contig77403	ref|XP_012055855.1| PREDICTED: pre-mRNA 3' end processing protein WDR33-like [Atta cephalotes]	60.3694189768596	0.798466913339518	0.220229240664662	3.62561715660332	0.000288272166105944	0.00602740387516057
Contig2438	ref|XP_011692346.1| PREDICTED: bifunctional glutamate/proline--tRNA ligase [Wasmannia auropunctata]	1112.17773806081	0.800238200387346	0.19341752253128	4.13736144437446	3.51322463727526e-05	0.0010326017467695
Contig74569	ref|XP_011172779.1| PREDICTED: putative phosphatidate phosphatase [Solenopsis invicta]	248.353035203292	0.800992424623138	0.217338949156252	3.68545273515277	0.00022829644891309	0.00497912425585394
Contig1020	ref|XP_011872543.1| PREDICTED: histidine--tRNA ligase, cytoplasmic isoform X3 [Vollenhovia emeryi]	112.899285888558	0.802856469692626	0.219243054598632	3.66194710779968	0.000250305546110119	0.00537954616960027
Contig7336	ref|XP_011877204.1| PREDICTED: uncharacterized protein LOC105567181 isoform X2 [Vollenhovia emeryi]	25.9742897395306	0.802934360247156	0.239046281220125	3.35890755609696	0.000782512395573402	0.0136155550440456
Contig86431	ref|XP_011170023.1| PREDICTED: transmembrane emp24 domain-containing protein bai isoform X2 [Solenopsis invicta]	59.4129183449331	0.802973447502262	0.207706717338325	3.86590023564009	0.000110680177757448	0.00273153441790692
Contig21309	#N/A	20.8002179940736	0.803373516370982	0.211366510617513	3.80085527278613	0.000144197510026771	0.00341098920718132
Contig111347	#N/A	79.4678646874596	0.803747160814041	0.274316124610062	2.93000333814339	0.00338958362562864	0.0442378013478975
Contig71	#N/A	56.6851326238718	0.804447979122149	0.161034062513525	4.99551440587039	5.86791431502001e-07	3.07722866170581e-05
Contig8170	#N/A	58.1685142638418	0.804794123568246	0.243896805781281	3.299732118222	0.000967771582458763	0.0161829069523505
Contig126562	ref|XP_011689830.1| PREDICTED: E3 ubiquitin-protein ligase TRIP12 isoform X4 [Wasmannia auropunctata]	92.5980266057319	0.804895199060659	0.221915082683395	3.6270414310189	0.000286687307205234	0.00600166910764598
Contig39736	ref|XP_011691120.1| PREDICTED: protein abrupt-like isoform X2 [Wasmannia auropunctata]	34.3581878684693	0.805448069679736	0.258839851774835	3.11176221187299	0.001859742325725	0.0273445207270345
Contig12495	#N/A	190.343238524783	0.805586932032962	0.195250458275724	4.12591570410221	3.6926251503223e-05	0.0010755405221989
Contig63942	ref|XP_011641251.1| PREDICTED: serine/arginine-rich splicing factor 7-like [Pogonomyrmex barbatus]	32.4992203818935	0.806448593157416	0.247366723975787	3.2601337002642	0.00111359706023984	0.018142641966286
Contig24535	ref|XP_011052344.1| PREDICTED: transmembrane emp24 domain-containing protein bai isoform X2 [Acromyrmex echinatior]	662.559394560821	0.806828956530961	0.1632266174062	4.94299869317952	7.69299997485417e-07	3.93987348410073e-05
Contig136907	ref|XP_011874992.1| PREDICTED: shootin-1-like isoform X2 [Vollenhovia emeryi]	173.092282843679	0.80815771610156	0.201029541466698	4.02009431153897	5.81748478409466e-05	0.00158483805044237
Contig29104	#N/A	65.230106283813	0.808695796966031	0.229735242896023	3.52012075627441	0.000431350364755128	0.00837827962845916
Contig4518	ref|XP_011700053.1| PREDICTED: solute carrier family 35 member E1 homolog isoform X1 [Wasmannia auropunctata]	186.60902537733	0.808921699331251	0.203554411235948	3.97398265367777	7.06807129499689e-05	0.00186775023499554
Contig47020	ref|XP_011700056.1| PREDICTED: signal peptidase complex subunit 1 [Wasmannia auropunctata]	185.789007032074	0.809241240074007	0.17617415914414	4.59341621952578	4.36048128216311e-06	0.000184218787725629
Contig4239	ref|XP_012270009.1| PREDICTED: uncharacterized protein LOC105694175 isoform X2 [Orussus abietinus]	46.1017262148105	0.809414219587661	0.192702095081874	4.2003394890116	2.66515055034805e-05	0.000814402268442769
Contig69220	ref|XP_012060342.1| PREDICTED: elongation of very long chain fatty acids protein AAEL008004 [Atta cephalotes]	75.9132475832244	0.810052619230241	0.257235684836246	3.14906782760686	0.00163792174188234	0.0247135201494917
Contig23617	ref|XP_011160126.1| PREDICTED: nucleobindin-2 isoform X2 [Solenopsis invicta]	635.285264951929	0.810246775566949	0.241527270576335	3.35468029607394	0.000794567556670023	0.0137899263668094
Contig29072	ref|XP_012539442.1| PREDICTED: uncharacterized protein LOC105838433 isoform X2 [Monomorium pharaonis]	672.617571644814	0.810915707304308	0.276367907727015	2.93418911759211	0.00334420377160583	0.0437803697540837
Contig6525	ref|XP_012060448.1| PREDICTED: threonine--tRNA ligase, cytoplasmic [Atta cephalotes]	114.836545769458	0.810933908346836	0.276204414202288	2.93599184751957	0.00332483060334481	0.0435898663420344
Contig98662	ref|XP_011175566.1| PREDICTED: adrenodoxin [Solenopsis invicta]	73.4438839955115	0.811504655815089	0.171553907327263	4.73031869957371	2.24167644077148e-06	0.00010263427037096
Contig9915	ref|XP_011861589.1| PREDICTED: LOW QUALITY PROTEIN: poly(ADP-ribose) glycohydrolase ARH3-like [Vollenhovia emeryi]	47.444097437623	0.811734793240112	0.187269998176674	4.33456934449428	1.46045747037084e-05	0.000505380146432436
Contig31992	ref|XP_011874761.1| PREDICTED: plastin-2 isoform X2 [Vollenhovia emeryi]	538.719451995277	0.811745707486965	0.250164707323534	3.24484503098652	0.00117514557122861	0.018949606598882
Contig15956	ref|XP_011166214.1| PREDICTED: syndecan [Solenopsis invicta]	211.938355521946	0.812037488704984	0.267809038013543	3.03215117282159	0.00242817564446014	0.0339409000049286
Contig14178	#N/A	147.556098124964	0.812743706852371	0.261055377154433	3.11330000443383	0.00185007851728633	0.0272328826704947
Contig84956	ref|XP_011696082.1| PREDICTED: annexin B9-like isoform X2 [Wasmannia auropunctata]	233.687124712576	0.81298188817237	0.184296160734888	4.41127956724966	1.02761535356369e-05	0.000378487312759874
Contig98528	ref|XP_012523859.1| PREDICTED: protein FAM195A-like [Monomorium pharaonis]	31.0341348855309	0.813311023048177	0.268317753572495	3.0311487488972	0.00243625194988135	0.0340362492975389
Contig66175	ref|XP_011871964.1| PREDICTED: glutamate--cysteine ligase catalytic subunit isoform X2 [Vollenhovia emeryi]	92.1204049181999	0.813333030384964	0.192658768956516	4.2216247658498	2.42547639396709e-05	0.000754596365431184
Contig84221	ref|XP_011695142.1| PREDICTED: la-related protein CG11505 [Wasmannia auropunctata]	520.742085803985	0.814814657207747	0.276837007050648	2.94330106328116	0.00324732453146421	0.0427805196240516
Contig76772	#N/A	38.2830534066923	0.814926309478325	0.248659837312802	3.27727355685988	0.00104814766149945	0.0172723048365265
Contig111353	ref|XP_011068258.1| PREDICTED: hypoxia up-regulated protein 1 isoform X1 [Acromyrmex echinatior]	1184.64106527208	0.815114597632923	0.20133326134221	4.04858388623357	5.15284654559243e-05	0.00142728376518377
Contig97086	ref|XP_012221250.1| PREDICTED: transmembrane and ubiquitin-like domain-containing protein 1 [Linepithema humile]	90.3256614806308	0.815549841241721	0.133214705174364	6.12207068412043	9.23670288350407e-10	7.64729074996044e-08
Contig63790	ref|XP_011171736.1| PREDICTED: coatomer subunit gamma [Solenopsis invicta]	1177.19877409569	0.815582161294102	0.165923160059204	4.91542085506984	8.85919359524763e-07	4.46960818536425e-05
Contig38308	ref|XP_011158212.1| PREDICTED: tetraspanin-7-like [Solenopsis invicta]	50.5521342755425	0.815692508076834	0.279312472326334	2.92035834018834	0.00349629109718067	0.0453511258587335
Contig15654	ref|XP_011880772.1| PREDICTED: beta-1,3-galactosyltransferase 1-like [Vollenhovia emeryi]	88.8807967252993	0.815940523006616	0.265080611122403	3.07808451003551	0.00208335824172944	0.0299642109018874
Contig150090	ref|XP_011061645.1| PREDICTED: leukotriene A-4 hydrolase-like [Acromyrmex echinatior]	35.5264921975729	0.816546080834893	0.279707214476827	2.91928859383262	0.00350831265250634	0.0454853070800187
Contig63039	#N/A	33.9058913231509	0.816780852565403	0.228352949912443	3.57683512684456	0.000347779370700267	0.00703042299370798
Contig123293	ref|XP_011876860.1| PREDICTED: alkaline ceramidase [Vollenhovia emeryi]	49.5219312559888	0.816831297210686	0.255445683454633	3.19767116893073	0.00138542162204011	0.0215832932626476
Contig95560	#N/A	317.934086193067	0.817275855866937	0.257648065905462	3.17206284081643	0.001513602508147	0.023183384971747
Contig21455	ref|XP_011052256.1| PREDICTED: N-acetyltransferase 6 isoform X2 [Acromyrmex echinatior]	16.8106236708718	0.817694901264063	0.278133886323656	2.93993267800722	0.00328283565973781	0.0431602981250299
Contig111227	#N/A	61.5861380256065	0.817862506366543	0.253390035277467	3.22768219938471	0.00124797536975526	0.0198748443221581
Contig88006	ref|XP_011630488.1| PREDICTED: nucleobindin-2 isoform X1 [Pogonomyrmex barbatus]	1668.82029944158	0.818861911688966	0.229932143224816	3.56131987552661	0.000368995210228887	0.00738502308736427
Contig23162	ref|XP_011870449.1| PREDICTED: unconventional myosin-Ie-like [Vollenhovia emeryi]	1354.89692809369	0.819542193729044	0.203576825176733	4.02571458228395	5.68025540307522e-05	0.00155436921809011
Contig82968	ref|XP_012063470.1| PREDICTED: uncharacterized protein LOC105626785 [Atta cephalotes]	286.698863470456	0.819995365495814	0.172723238412401	4.74745247387013	2.05994773141747e-06	9.53764942466538e-05
Contig5358	ref|XP_011161248.1| PREDICTED: endophilin-B1 isoform X6 [Solenopsis invicta]	54.2106273625272	0.820558314604049	0.25982699813585	3.15809488810328	0.0015880385856572	0.0241138808703358
Contig11231	#N/A	101.609098438847	0.821238033684847	0.199789543230096	4.1105155976008	3.94776610800323e-05	0.00113812149866231
Contig116228	ref|XP_011869649.1| PREDICTED: uncharacterized protein LOC105563014 isoform X2 [Vollenhovia emeryi]	358.470694515304	0.82126527435275	0.192392349847517	4.26870026278932	1.96615259787098e-05	0.000637736949073607
Contig18402	ref|XP_011873448.1| PREDICTED: UDP-glucuronosyltransferase 1-7C-like [Vollenhovia emeryi]	325.822816476778	0.822032623499673	0.224094010835357	3.66824896584864	0.000244217317274234	0.00527209284699586
Contig2943	ref|XP_011644971.1| PREDICTED: E3 SUMO-protein ligase EGR2, partial [Pogonomyrmex barbatus]	234.422424788859	0.823099588323235	0.165934769134221	4.96038047130103	7.03552420340602e-07	3.62756240434853e-05
Contig111261	ref|XP_011158212.1| PREDICTED: tetraspanin-7-like [Solenopsis invicta]	149.935134588243	0.823892422958644	0.257483117709078	3.19979201078936	0.0013752679351744	0.0214645627529912
Contig23368	ref|XP_011056758.1| PREDICTED: histone deacetylase 4 isoform X4 [Acromyrmex echinatior]	316.52987887728	0.82434769744083	0.224040422033883	3.67945967052391	0.000233728646618318	0.00507701159090457
Contig18769	ref|XP_012532513.1| PREDICTED: ER degradation-enhancing alpha-mannosidase-like protein 2 [Monomorium pharaonis]	255.978151542124	0.824374076911958	0.217981591549153	3.78185181167497	0.000155666024924781	0.00364162365087964
Contig94745	ref|XP_012522220.1| PREDICTED: separin [Monomorium pharaonis]	451.038317741387	0.824629727079792	0.197804070910401	4.16892191998071	3.06043800874242e-05	0.000918023092496338
Contig3820	ref|XP_011165128.1| PREDICTED: fasciclin-2 isoform X2 [Solenopsis invicta]	647.6862289309	0.824763732507624	0.183584800666545	4.49254910816766	7.03756832114829e-06	0.000277401980691624
Contig6997	ref|XP_012059717.1| PREDICTED: cytohesin-1 [Atta cephalotes]	100.848992505709	0.825176538739565	0.285052722831045	2.89482075646988	0.00379375093393424	0.0483675603228879
Contig26703	ref|XP_011881795.1| PREDICTED: ribonuclease P protein subunit p25-like protein [Vollenhovia emeryi]	50.3819925450101	0.825849361399947	0.274975012132512	3.0033614872684	0.00267015064548373	0.0365287813615081
Contig89741	ref|XP_011050180.1| PREDICTED: DNA/RNA-binding protein KIN17 [Acromyrmex echinatior]	90.6241005787959	0.826096605587228	0.258685127784671	3.19344452718159	0.00140586345768653	0.0218390340149715
Contig129793	#N/A	23.9615497782177	0.826189332010794	0.204918220412315	4.0318002486476	5.53512238486248e-05	0.00151951434635777
Contig63151	ref|XP_011155744.1| PREDICTED: cystathionine gamma-lyase [Solenopsis invicta]	137.832538947858	0.826248633245846	0.193701122045312	4.26558516812599	1.99378936792499e-05	0.000644850349014499
Contig117321	ref|XP_011706280.1| PREDICTED: vitellogenin-1-like, partial [Wasmannia auropunctata]	1367.03713514986	0.826364952514435	0.262358256739813	3.14975775027337	0.00163405895898928	0.0246717069321279
Contig14930	ref|XP_012542375.1| PREDICTED: uncharacterized protein LOC105840131 isoform X1 [Monomorium pharaonis]	2497.5956536562	0.826926661320968	0.247855955060718	3.33631952122512	0.000848955301831016	0.014547665441308
Contig31274	ref|XP_011881463.1| PREDICTED: sialin isoform X2 [Vollenhovia emeryi]	171.820785714364	0.827012577604206	0.242813054551217	3.40596422681122	0.000659308176205158	0.0118484830141019
Contig51021	#N/A	257.207359704826	0.828509085779076	0.207658014865332	3.98977658683857	6.61355591996435e-05	0.00176241063574385
Contig127326	#N/A	304.906731328535	0.828692610326909	0.17067437794066	4.85540138083893	1.20143136056586e-06	5.89048852247936e-05
Contig145062	ref|XP_011172340.1| PREDICTED: myosin heavy chain 95F isoform X1 [Solenopsis invicta]	23.9061002987456	0.829188634382769	0.28651270721051	2.89407280555112	0.0038027997605579	0.0484738120808628
Contig18488	ref|XP_011877344.1| PREDICTED: protein NDRG3 isoform X7 [Vollenhovia emeryi]	384.095424566082	0.829676839591618	0.250415230832368	3.31320437991656	0.000922335535182489	0.0155574143368455
Contig24710	#N/A	242.196672209577	0.829740914763415	0.248184840228149	3.34323770138683	0.000828069358974284	0.0142564171699808
Contig94742	ref|XP_011056575.1| PREDICTED: zinc finger protein 836-like [Acromyrmex echinatior]	221.758230344908	0.83011165834172	0.197085386596184	4.21193916341737	2.53187741088976e-05	0.000781531423603537
Contig25884	ref|XP_011645157.1| PREDICTED: transcription factor SPT20 homolog [Pogonomyrmex barbatus]	478.364953797184	0.83030730724381	0.263393746014345	3.15234252827928	0.00161966156023253	0.0245061678934926
Contig6717	#N/A	74.8605600908761	0.830563051258026	0.200344355552881	4.14567732125999	3.38810682157619e-05	0.0010023385355399
Contig11027	ref|XP_011691833.1| PREDICTED: sialin [Wasmannia auropunctata]	470.754497747646	0.83090410593666	0.286097593138209	2.90426807447927	0.00368112821559918	0.0472247206347807
Contig113658	ref|XP_012063455.1| PREDICTED: leucine-rich repeat-containing protein 59 [Atta cephalotes]	20.3747843760069	0.831361523451183	0.283635905002519	2.93108703372304	0.00337778133318796	0.0441219839837172
Contig97406	ref|XP_011703524.1| PREDICTED: myotubularin-related protein 14 [Wasmannia auropunctata]	94.2499333490238	0.831689585199548	0.218746912351177	3.80206319833374	0.000143496110033503	0.00340032875521291
Contig25912	ref|XP_011860433.1| PREDICTED: chitinase-3-like protein 2 [Vollenhovia emeryi]	386.788093272874	0.832732950688166	0.142191624298518	5.85641351799965	4.72969699739103e-09	3.5378550943419e-07
Contig44610	ref|XP_011060856.1| PREDICTED: lysine--tRNA ligase isoform X2 [Acromyrmex echinatior]	92.0441096820759	0.833493913624181	0.204656229225714	4.07265352624536	4.64805421526357e-05	0.00130922449623057
Contig24638	ref|XP_011705197.1| PREDICTED: uncharacterized protein LOC105460443 [Wasmannia auropunctata]	198.146072971921	0.834355864627328	0.193132054528744	4.32013145960268	1.55936278367473e-05	0.000529431536142104
Contig139841	ref|XP_011688503.1| PREDICTED: nucleosome assembly protein 1-like 1 isoform X3 [Wasmannia auropunctata]	66.8952466330447	0.83471492575021	0.158012020271552	5.28260397098718	1.27360511746991e-07	7.62554898015737e-06
Contig2340	ref|XP_012527361.1| PREDICTED: glycine-rich protein DOT1-like [Monomorium pharaonis]	13414.5118540183	0.836083975772547	0.287214763274036	2.91100626667587	0.00360266791755769	0.0464378107567407
Contig94803	ref|XP_011703520.1| PREDICTED: E3 SUMO-protein ligase PIAS2 isoform X2 [Wasmannia auropunctata]	411.110481858579	0.836719751069378	0.160915374100107	5.1997502149723	1.99556521617765e-07	1.14061887895946e-05
Contig31429	ref|XP_011696169.1| PREDICTED: leukotriene A-4 hydrolase [Wasmannia auropunctata]	256.070089351962	0.837122483515003	0.198237699221876	4.22282182854665	2.41262540032172e-05	0.000751460222873748
Contig14555	ref|XP_011859505.1| PREDICTED: ubiquitin conjugation factor E4 A isoform X1 [Vollenhovia emeryi]	118.50548941423	0.837469074724949	0.212356159181289	3.94370042269413	8.02338768324065e-05	0.00208046596037284
Contig80915	ref|XP_011694637.1| PREDICTED: protein NPC2 homolog [Wasmannia auropunctata]	104.118809637751	0.837574278539026	0.289570364209334	2.89247237308281	0.00382222795747905	0.0486757087262244
Contig77096	ref|XP_011700196.1| PREDICTED: mitochondrial import inner membrane translocase subunit Tim10 B isoform X1 [Wasmannia auropunctata]	38.1610476622298	0.837589527437196	0.2671936888842	3.13476538661885	0.00171991604563241	0.0257188989538421
Contig6394	ref|XP_011172119.1| PREDICTED: cysteine-rich with EGF-like domain protein 2 [Solenopsis invicta]	499.156173348016	0.838901424766528	0.216233331224414	3.87961199143664	0.000104623222884107	0.00260671940992196
Contig84069	#N/A	98.2007933000099	0.839144410404143	0.285529466769985	2.93890651601341	0.00329372403903394	0.0432754506587437
Contig132610	ref|XP_012542053.1| PREDICTED: peptidyl-alpha-hydroxyglycine alpha-amidating lyase 1-like isoform X1 [Monomorium pharaonis]	183.739432398645	0.839778308830239	0.201169640243283	4.17447835475899	2.98669612995854e-05	0.000899085036555378
Contig21077	ref|XP_012523080.1| PREDICTED: coatomer subunit gamma [Monomorium pharaonis]	337.237813556807	0.840026368283444	0.1773464711852	4.73663988163721	2.17290779080065e-06	9.99242852294473e-05
Contig3851	ref|XP_011051564.1| PREDICTED: protein toll [Acromyrmex echinatior]	3702.69171160675	0.840704449285868	0.268329473966514	3.13310512206639	0.00172967481993647	0.0258337656638838
Contig19800	ref|XP_011865093.1| PREDICTED: XK-related protein 6 [Vollenhovia emeryi]	79.0377805749168	0.840885707139284	0.247570478459138	3.39655080190862	0.000682408888653875	0.0121913053650252
Contig21721	ref|XP_011686185.1| PREDICTED: probable serine/threonine-protein kinase DDB_G0282963 isoform X1 [Wasmannia auropunctata]	1250.50378966638	0.840902836457438	0.203385290371733	4.13453123832357	3.55679873726907e-05	0.00104359953257466
Contig63038	ref|XP_011637213.1| PREDICTED: transmembrane 9 superfamily member 3 [Pogonomyrmex barbatus]	175.501639309447	0.84164137698535	0.207357698998202	4.05888655714996	4.9307258482676e-05	0.00137389655883904
Contig23163	ref|XP_011697163.1| PREDICTED: uncharacterized protein LOC105455492 [Wasmannia auropunctata]	574.931957722344	0.842051182086817	0.284872024022572	2.95589286092935	0.00311765368392692	0.0414344851717038
Contig89338	ref|XP_011875223.1| PREDICTED: protein canopy homolog 3 [Vollenhovia emeryi]	386.873452637776	0.842762580393049	0.263347820200805	3.200188176042	0.00137337888936723	0.0214474210850584
Contig142747	#N/A	129.46785615395	0.84296493844027	0.236006504237518	3.57178689275406	0.000354553869120732	0.00714131418490108
Contig64287	#N/A	44.7483236114158	0.843566534849394	0.281970809333083	2.99168036877504	0.00277446585761839	0.0377048214064595
Contig98665	#N/A	44.1520452410839	0.844062648848418	0.187013099403453	4.51338784042863	6.38001963646722e-06	0.000255151867584744
Contig17850	ref|XP_011879123.1| PREDICTED: uncharacterized protein LOC105568241 [Vollenhovia emeryi]	180.89747127994	0.844176934664942	0.259421730001578	3.25407179521857	0.00113763524501425	0.0184677120083028
Contig141239	ref|XP_011867420.1| PREDICTED: protein kinase C and casein kinase substrate in neurons protein 1 isoform X6 [Vollenhovia emeryi]	44.0896259129041	0.84539076015892	0.249618367904805	3.38673298465488	0.00070730191169666	0.0125352903100929
Contig15049	ref|XP_012059059.1| PREDICTED: glutamate--cysteine ligase catalytic subunit [Atta cephalotes]	85.1183220434296	0.845736076143502	0.215706988783591	3.92076344356182	8.8268879723617e-05	0.00225815805599672
Contig83297	#N/A	23.8272834918919	0.845942050821958	0.269281580819376	3.14147758731922	0.00168097673982276	0.025270366876657
Contig124261	ref|XP_008553428.1| PREDICTED: serine/threonine-protein phosphatase 2A catalytic subunit beta isoform [Microplitis demolitor]	1508.05592416333	0.846108396314619	0.162294871465469	5.21340193115495	1.85408568233986e-07	1.06859318200101e-05
Contig35714	ref|XP_011700717.1| PREDICTED: dual 3',5'-cyclic-AMP and -GMP phosphodiesterase 11-like [Wasmannia auropunctata]	1322.86163522604	0.84658834168539	0.260453083982639	3.25044468178315	0.00115224682678688	0.0186602341972624
Contig135070	ref|XP_011162854.1| PREDICTED: transcription factor kayak isoform X3 [Solenopsis invicta]	79.4940205270755	0.847765428304113	0.190384108254576	4.45292118169078	8.47098563703862e-06	0.000322511018018348
Contig57680	ref|XP_012539441.1| PREDICTED: uncharacterized protein LOC105838433 isoform X1 [Monomorium pharaonis]	216.268823216869	0.848112943860588	0.276243254167752	3.07016707581051	0.00213939055202546	0.0306336511796411
Contig21794	ref|XP_011635989.1| PREDICTED: S-adenosylmethionine decarboxylase proenzyme isoform X2 [Pogonomyrmex barbatus]	134.645728527532	0.848298784535812	0.277274436871602	3.05941937564419	0.00221766469802348	0.0315545462551417
Contig52952	ref|XP_011866731.1| PREDICTED: uncharacterized protein LOC105561396 [Vollenhovia emeryi]	58.0757199332246	0.848412068301011	0.283895649158539	2.98846449678143	0.00280383073516434	0.0380428915776465
Contig87732	#N/A	12.4749996227122	0.848530737270454	0.291661595640471	2.90929882423201	0.00362240437424503	0.0466390151722078
Contig86449	#N/A	52.123055978152	0.848872294572104	0.225526860441024	3.76395207609466	0.000167248949607011	0.0038592022682496
Contig24517	ref|XP_011684957.1| PREDICTED: zinc finger protein sens-like, partial [Wasmannia auropunctata]	43.4370849785835	0.849104562750381	0.244665568091429	3.47047019886787	0.000519547992284557	0.00976912590175844
Contig65971	ref|XP_012061960.1| PREDICTED: hypoxia up-regulated protein 1-like, partial [Atta cephalotes]	883.323328163548	0.849534242976583	0.204934960601559	4.14538466488533	3.39243724108627e-05	0.0010030757270747
Contig14546	ref|XP_011689895.1| PREDICTED: zinc finger protein 598 [Wasmannia auropunctata]	525.686393471651	0.849555320346017	0.219891948093545	3.8635126375096	0.000111768108195025	0.00275687890592216
Contig73250	#N/A	89.5200439163827	0.849726736137577	0.163371074416814	5.20120675689284	1.9799868457989e-07	1.13297019454081e-05
Contig6392	ref|XP_012217309.1| PREDICTED: ras-related protein Rab-30 [Linepithema humile]	114.038847403647	0.849913503687005	0.246405127213135	3.44925251069085	0.000562140764992906	0.0104017134266268
Contig93771	#N/A	142.171673989187	0.850099419732596	0.201832365142021	4.21190832864896	2.53222312984938e-05	0.000781531423603537
Contig116619	ref|XP_012530822.1| PREDICTED: probable signal peptidase complex subunit 2 [Monomorium pharaonis]	198.749180561325	0.850117501882271	0.181671099207265	4.67943170703441	2.87671157346664e-06	0.00012816109176219
Contig108694	ref|XP_011703533.1| PREDICTED: transmembrane emp24 domain-containing protein 7-like [Wasmannia auropunctata]	78.7605948768783	0.850363986975158	0.181437848804918	4.68680593699868	2.77501870613389e-06	0.000124242782044781
Contig14507	ref|XP_011630489.1| PREDICTED: nucleobindin-2 isoform X2 [Pogonomyrmex barbatus]	1276.48930278539	0.850782967436759	0.238699981004979	3.5642355891893	0.00036491809332504	0.00731854515057408
Contig31486	#N/A	37.1577022927508	0.85105990639752	0.286811181091737	2.96731774248825	0.00300410328537722	0.0402289387719113
Contig83209	ref|XP_012064353.1| PREDICTED: dnaJ homolog subfamily B member 11 [Atta cephalotes]	39.3733414565103	0.852133833484153	0.190185116579638	4.48054952358657	7.44511016743698e-06	0.000291472624205196
Contig68208	ref|XP_011170161.1| PREDICTED: E3 ubiquitin-protein ligase synoviolin B [Solenopsis invicta]	476.198930362792	0.852846155609481	0.172163423027031	4.95370120211643	7.28149916903252e-07	3.74184626111851e-05
Contig2108	ref|XP_012521946.1| PREDICTED: uncharacterized protein LOC105828248 [Monomorium pharaonis]	9.52406975112176	0.853475170130613	0.289656877352575	2.94650407727675	0.00321388181991234	0.0424659636063662
Contig144076	#N/A	138.604130674982	0.853790324239395	0.243070489282886	3.51252151899752	0.000443876057866489	0.00858590895899388
Contig5378	ref|XP_011868086.1| PREDICTED: multidrug resistance protein homolog 49 isoform X1 [Vollenhovia emeryi]	906.590942113395	0.854276452116622	0.269439444653275	3.17056937678868	0.0015214049762695	0.0232844841949906
Contig16139	ref|XP_011631052.1| PREDICTED: uncharacterized protein LOC105423105 isoform X4 [Pogonomyrmex barbatus]	46.967384812697	0.854637616984271	0.260149615487752	3.28517732144989	0.00101918207849557	0.0168802342932461
Contig832	#N/A	1183.68816930751	0.855333469911675	0.196137010784596	4.36089785650415	1.29529827091604e-05	0.000458524092174388
Contig111388	ref|XP_011862715.1| PREDICTED: cytochrome P450 6B2-like [Vollenhovia emeryi]	649.127821851051	0.855692456670972	0.282495458093671	3.02904854628579	0.00245325257890238	0.0342208799871701
Contig14322	#N/A	23.8250899747035	0.855851725463191	0.279994617309652	3.05667206636579	0.00223808984272847	0.0317896740644235
Contig4008	ref|XP_011068685.1| PREDICTED: uncharacterized protein LOC105154694 [Acromyrmex echinatior]	111.666583161584	0.856338271894183	0.250590398334822	3.41728285514755	0.000632495278806102	0.0114626773673675
Contig30573	ref|XP_011866924.1| PREDICTED: prominin-like protein isoform X3 [Vollenhovia emeryi]	177.369207206863	0.856630133413729	0.217998452846485	3.92952391280029	8.5114212491709e-05	0.00218818555693851
Contig127005	#N/A	198.597683261191	0.856794019739072	0.177212860200043	4.83482981298252	1.3325959332441e-06	6.46809824233949e-05
Contig140847	ref|XP_012059769.1| PREDICTED: HMG box transcription factor BBX [Atta cephalotes]	227.975674511311	0.857149957610688	0.217589697457472	3.93929477188698	8.17214737607652e-05	0.00211136901173412
Contig3152	ref|XP_017021020.1| PREDICTED: actin-1, partial [Drosophila kikkawai]	396.13407359028	0.85845764991586	0.169954143759357	5.05111338227431	4.39242233722401e-07	2.35723768436999e-05
Contig65972	ref|XP_011068274.1| PREDICTED: hypoxia up-regulated protein 1 isoform X3 [Acromyrmex echinatior]	566.084828752938	0.858813522233095	0.184014740620891	4.66709090443156	3.05494193531435e-06	0.000135036797788696
Contig56445	ref|XP_011056359.1| PREDICTED: protein argonaute-2-like [Acromyrmex echinatior]	354.519177193881	0.859306198627989	0.161585971214721	5.31795051369968	1.04942600028462e-07	6.38192186558736e-06
Contig24533	ref|XP_011862222.1| PREDICTED: helicase domino-like isoform X7 [Vollenhovia emeryi]	22.7237155528218	0.86051808304605	0.245248731343402	3.5087565115317	0.000450206862304501	0.00868606536129786
Contig71373	ref|XP_011159626.1| PREDICTED: zinc finger protein 598 [Solenopsis invicta]	211.403773945014	0.860957496124233	0.223792900009564	3.8471171162599	0.000119515846743913	0.00291511187775701
Contig62981	#N/A	104.676982485555	0.860990490793056	0.179874891307498	4.78660742772143	1.6962416246767e-06	8.0179195430082e-05
Contig114974	#N/A	25.9965678250095	0.861641968621869	0.235091455856088	3.66513519380869	0.000247207960277191	0.0053180298738945
Contig27520	ref|XP_011876565.1| PREDICTED: trichohyalin isoform X1 [Vollenhovia emeryi]	4002.39467129869	0.862397631063801	0.175950193325462	4.90137359194934	9.51688779516086e-07	4.77654782180956e-05
Contig40755	ref|XP_011868605.1| PREDICTED: myotubularin-related protein 14 [Vollenhovia emeryi]	255.623823625688	0.862906901437927	0.198958354111659	4.33712324014124	1.44359690791416e-05	0.000501208272068281
Contig18558	ref|XP_011637223.1| PREDICTED: dnaJ homolog subfamily B member 11 [Pogonomyrmex barbatus]	1057.6373771134	0.863749443411433	0.186364891265752	4.63472190252694	3.57417648766549e-06	0.000155156328488562
Contig26937	ref|XP_012533096.1| PREDICTED: ubiquitin-conjugating enzyme E2 S [Monomorium pharaonis]	146.023531277288	0.863984208162209	0.224002020805301	3.85703756178687	0.000114769531440528	0.0028160584832234
Contig8965	ref|XP_011168051.1| PREDICTED: nuclear receptor-binding protein homolog isoform X1 [Solenopsis invicta]	200.730923187822	0.864220494096895	0.270372855164504	3.19640258845909	0.00139152804205536	0.0216510651554951
Contig59911	ref|XP_011707043.1| PREDICTED: uncharacterized protein LOC105462213, partial [Wasmannia auropunctata]	278.193581268583	0.864674349292703	0.270025513739341	3.2021949974971	0.00136384642003743	0.0213403332649078
Contig135821	ref|XP_012059975.1| PREDICTED: protein canopy homolog 2 [Atta cephalotes]	229.361490430117	0.864765943673629	0.268552744066106	3.22009721658536	0.00128147131400423	0.02031627902471
Contig46753	ref|XP_011169396.1| PREDICTED: ubiquitin-like modifier-activating enzyme 5 isoform X1 [Solenopsis invicta]	125.538971858214	0.865076246044243	0.273175195612704	3.16674522408217	0.00154155311310331	0.023537061909524
Contig99589	ref|XP_011869298.1| PREDICTED: adrenodoxin-like [Vollenhovia emeryi]	174.106497826804	0.866722352079073	0.151121925459885	5.73525217761432	9.73673651557699e-09	6.95333220549477e-07
Contig139864	ref|XP_011061551.1| PREDICTED: alaserpin-like isoform X2 [Acromyrmex echinatior]	364.393174029113	0.86676245418596	0.188747739361255	4.59217396255545	4.3865247500991e-06	0.000184858349117445
Contig15052	ref|XP_011638167.1| PREDICTED: membrane-associated guanylate kinase, WW and PDZ domain-containing protein 1-like isoform X1 [Pogonomyrmex barbatus]	1076.27099304726	0.866801169526877	0.232325474942832	3.73097771451956	0.000190738097416457	0.00429110091954801
Contig3313	ref|XP_011174067.1| PREDICTED: ATP-binding cassette sub-family G member 4-like, partial [Solenopsis invicta]	43.2410966035991	0.8670424435362	0.233741037404763	3.70941471451915	0.000207738917891252	0.00461462827369439
Contig125717	ref|XP_011864565.1| PREDICTED: ejaculatory bulb-specific protein 3-like [Vollenhovia emeryi]	47.3875937531662	0.867385922593514	0.275669986346651	3.1464648512834	0.00165257123166189	0.0249096137613199
Contig83418	ref|XP_011163408.1| PREDICTED: serine/threonine-protein kinase pelle [Solenopsis invicta]	37.6361753377816	0.867633109846536	0.204594248719602	4.24075024237673	2.22773913782451e-05	0.000704870649683283
Contig9088	ref|XP_011642174.1| PREDICTED: MIP18 family protein CG30152 isoform X3 [Pogonomyrmex barbatus]	153.821804849267	0.868677257335054	0.294964794731127	2.94502012732364	0.00322933654625901	0.0426097729504154
Contig2121	#N/A	174.908117479188	0.869112577495912	0.274987828596622	3.16054925751208	0.00157471976570451	0.0239544639715369
Contig29106	#N/A	439.294830550642	0.869938474415404	0.284677843296147	3.05586997689321	0.0022440854840305	0.0318569463866128
Contig50356	ref|XP_011163080.1| PREDICTED: probable signal peptidase complex subunit 2 [Solenopsis invicta]	267.235046565202	0.870618264576757	0.172006404923399	5.06154561491169	4.15871211028718e-07	2.24858989194467e-05
Contig21143	ref|XP_012062016.1| PREDICTED: F-box only protein 44-like [Atta cephalotes]	88.972195046167	0.873540493311256	0.247376650353181	3.53121643479324	0.000413653123834964	0.00809950256075005
Contig78045	#N/A	11.2472491522525	0.873686613137214	0.283212014426469	3.08492072593217	0.00203606413831899	0.0294056232219373
Contig109908	ref|XP_011066050.1| PREDICTED: mediator of RNA polymerase II transcription subunit 16 isoform X1 [Acromyrmex echinatior]	148.891487058591	0.873697547608651	0.23527822554373	3.71346539013345	0.000204440434730512	0.00455295270627566
Contig40093	#N/A	67.2510507082614	0.87374560109053	0.262092225205345	3.33373338490283	0.000856887506555733	0.0146558131307919
Contig28643	ref|XP_011054738.1| PREDICTED: phospholipid-transporting ATPase ID isoform X4 [Acromyrmex echinatior]	894.784695914357	0.874249596137729	0.187575864080635	4.66077872237288	3.15015251926012e-06	0.000138973579618394
Contig11820	ref|XP_011882070.1| PREDICTED: S-adenosylmethionine synthase isoform X3 [Vollenhovia emeryi]	156.167207703157	0.874644535368987	0.279031713614741	3.13457034699865	0.00172105982734287	0.0257303282356163
Contig2235	#N/A	84.5151919926316	0.874908432866864	0.281176481307356	3.1115989104028	0.0018607712652687	0.0273516837598255
Contig22426	#N/A	12.7613175844732	0.875101234068476	0.255228796596094	3.42869317937249	0.000606494742672665	0.0110773303747893
Contig27750	ref|XP_011861127.1| PREDICTED: endocuticle structural glycoprotein SgAbd-2-like [Vollenhovia emeryi]	138.612775955856	0.87561192703661	0.290015801269526	3.01918696568833	0.00253454065093538	0.0350769666125065
Contig65969	ref|XP_012062040.1| PREDICTED: hypoxia up-regulated protein 1-like, partial [Atta cephalotes]	133.849779595465	0.875654135020317	0.232947525981566	3.75901882336201	0.000170581005235575	0.00391822026490807
Contig125015	#N/A	171.530937632282	0.875690192494083	0.202681765817286	4.32051787669691	1.55663444285738e-05	0.000528678746139895
Contig74343	ref|XP_011061130.1| PREDICTED: mannosyl-oligosaccharide 1,2-alpha-mannosidase IA isoform X2 [Acromyrmex echinatior]	456.43626575488	0.875935014019933	0.174253990026363	5.02677163310528	4.98805761583907e-07	2.65066788994671e-05
Contig7691	#N/A	19.2978344594563	0.878564525668306	0.207434153654777	4.23538993067874	2.28155442177648e-05	0.00071822358717455
Contig141453	ref|XP_011156123.1| PREDICTED: protein NDRG3 isoform X5 [Solenopsis invicta]	32.1613878167506	0.878642113851724	0.302305757992666	2.90646833750695	0.00365533890386079	0.0469738586286532
Contig17585	ref|XP_011862380.1| PREDICTED: uncharacterized protein LOC105559004 [Vollenhovia emeryi]	25.3534198800049	0.878805912535838	0.262414124654441	3.34892762991737	0.000811249828060262	0.0140363401610825
Contig18937	ref|XP_011065358.1| PREDICTED: uncharacterized protein LOC105152646 [Acromyrmex echinatior]	119.836814950405	0.878830472062253	0.169562518292282	5.18292887433635	2.18428351963977e-07	1.23941182105618e-05
Contig64469	#N/A	38.2658956087856	0.878856499905413	0.254289068515327	3.45613165771002	0.00054798759239993	0.0101939515705195
Contig100362	#N/A	144.846314298037	0.878961987370199	0.279696252925236	3.14255903744677	0.00167477935331476	0.025196752520571
Contig37144	#N/A	15.5837233211847	0.87946576287551	0.282111448259181	3.11744088480779	0.00182428528718391	0.0269443065237622
Contig66225	ref|XP_011706280.1| PREDICTED: vitellogenin-1-like, partial [Wasmannia auropunctata]	13091.4380796683	0.879628184236176	0.243382797305373	3.61417566884362	0.000301304727535183	0.00624406163202267
Contig108382	ref|XP_011872035.1| PREDICTED: sorting nexin-27 isoform X2 [Vollenhovia emeryi]	59.4612672284258	0.879718372735109	0.271581721518121	3.23923998941295	0.00119848684105406	0.0192436176252316
Contig36984	ref|XP_011684445.1| PREDICTED: uncharacterized protein LOC105447883 isoform X2 [Wasmannia auropunctata]	60.7246750677824	0.880498528794719	0.247839940738975	3.55269020065681	0.000381313245764282	0.00758721566650127
Contig50102	#N/A	265.315080369106	0.880816339799121	0.175029452264456	5.03238928308063	4.84404370808377e-07	2.57817952679777e-05
Contig35793	ref|XP_011694233.1| PREDICTED: transmembrane emp24 domain-containing protein-like [Wasmannia auropunctata]	682.531460585925	0.881066154746576	0.178052028513301	4.94836347613281	7.48400553358668e-07	3.83863814838058e-05
Contig1346	ref|XP_012059941.1| PREDICTED: translocation protein SEC63 homolog [Atta cephalotes]	1193.913115144	0.881248730940973	0.188970432402277	4.66342125452191	3.10995220986263e-06	0.00013733411233745
Contig57824	ref|XP_011872035.1| PREDICTED: sorting nexin-27 isoform X2 [Vollenhovia emeryi]	68.1707648817325	0.881322582361804	0.22554724014785	3.90748555284508	9.32616160715542e-05	0.00236509872332086
Contig111348	ref|XP_011881076.1| PREDICTED: uncharacterized protein LOC105569323 isoform X1 [Vollenhovia emeryi]	536.527913038812	0.881395882894503	0.208796173875219	4.22132200286987	2.42873699122026e-05	0.00075526424748302
Contig7775	#N/A	49.2212218674189	0.881449053077243	0.223288889021221	3.9475723890295	7.8947651052568e-05	0.00205655143101094
Contig4938	ref|XP_011066334.1| PREDICTED: shootin-1-like [Acromyrmex echinatior]	160.293404834221	0.8819865940732	0.196196593699189	4.49542256286811	6.94319234992479e-06	0.000274375458371271
Contig16373	ref|XP_011699994.1| PREDICTED: rab GTPase-binding effector protein 1 isoform X3 [Wasmannia auropunctata]	105.102904533471	0.882437030687138	0.201033031282705	4.38951263410142	1.13604978495472e-05	0.000411496409019361
Contig99590	ref|XP_011869298.1| PREDICTED: adrenodoxin-like [Vollenhovia emeryi]	109.136905473858	0.883315378756379	0.185838263201293	4.75314051875099	2.00281047055776e-06	9.30042187836323e-05
Contig25902	ref|XP_011707320.1| PREDICTED: cilia- and flagella-associated protein 58-like [Wasmannia auropunctata]	571.525045164469	0.883430281468698	0.179159929971267	4.93095906886312	8.18268798001898e-07	4.16236702071378e-05
Contig109621	ref|XP_011170072.1| PREDICTED: uncharacterized protein LOC105203040 [Solenopsis invicta]	60.8698119577653	0.883933152229333	0.302583915494042	2.92128268214818	0.00348593376413337	0.0452340849190684
Contig23396	ref|XP_011863744.1| PREDICTED: KN motif and ankyrin repeat domain-containing protein 1 isoform X4 [Vollenhovia emeryi]	2579.97463329798	0.883937295328012	0.284231339301001	3.10992200051495	0.001871367538789	0.0274836081227346
Contig14438	ref|XP_011705412.1| PREDICTED: aspartate--tRNA ligase, cytoplasmic [Wasmannia auropunctata]	646.751021335642	0.885244701652551	0.17464301445436	5.06888125138206	4.00160776587372e-07	2.16896097346602e-05
Contig21026	ref|XP_011698080.1| PREDICTED: uncharacterized protein LOC105456012 [Wasmannia auropunctata]	1476.10741151569	0.886079428848832	0.262405164091354	3.37676063623638	0.000733448468989334	0.0129025659195122
Contig43317	ref|XP_011159536.1| PREDICTED: lambda-crystallin homolog [Solenopsis invicta]	632.883657245673	0.886114696942253	0.283594680836995	3.12458151304882	0.00178058180400362	0.0264626652896599
Contig118352	ref|XP_011167947.1| PREDICTED: GDP-Man:Man(3)GlcNAc(2)-PP-Dol alpha-1,2-mannosyltransferase isoform X1 [Solenopsis invicta]	292.108064948109	0.886117428597339	0.239331652827241	3.70246650674734	0.000213513554839981	0.00471892384653528
Contig59993	#N/A	648.480290361978	0.886549532617099	0.254449408525337	3.48418783032392	0.000493632930775388	0.00937847243964324
Contig68221	ref|XP_011636734.1| PREDICTED: 26S proteasome non-ATPase regulatory subunit 9 [Pogonomyrmex barbatus]	289.725080952316	0.88676974155154	0.204976518008007	4.32620160674648	1.51702585684203e-05	0.000518748613002933
Contig47517	ref|XP_012061821.1| PREDICTED: protein MEF2BNB homolog [Atta cephalotes]	16.6559483102278	0.887014981056906	0.307532848058882	2.88429345566062	0.00392293001783488	0.0497107299045654
Contig34860	ref|XP_011065639.1| PREDICTED: probable chitinase 3 [Acromyrmex echinatior]	27.3870534783219	0.887257427319701	0.292297821720971	3.03545685731002	0.00240171581219181	0.0336577749462209
Contig142868	ref|XP_012216597.1| PREDICTED: RNA-binding protein 4.1 isoform X2 [Linepithema humile]	135.675158765662	0.887341320396938	0.258043790403515	3.4387237879639	0.000584463237924434	0.0107443944080092
Contig1180	ref|XP_011865783.1| PREDICTED: uncharacterized protein LOC105560891 isoform X1 [Vollenhovia emeryi]	420.400369672108	0.887761899231632	0.280378919092427	3.16629332228426	0.00154395019342799	0.0235630499135205
Contig56870	ref|XP_011159662.1| PREDICTED: phosphatidylglycerophosphatase and protein-tyrosine phosphatase 1 isoform X2 [Solenopsis invicta]	50.0557538885469	0.887936158788844	0.242956549458451	3.6547117612925	0.000257471076357524	0.00551170995250975
Contig136191	ref|XP_011861391.1| PREDICTED: uncharacterized protein LOC105558380 isoform X1 [Vollenhovia emeryi]	1029.28452349294	0.888806626784712	0.225617585467059	3.93943860778743	8.16724976790886e-05	0.0021105057355663
Contig149348	ref|XP_015587254.1| PREDICTED: 14-3-3 protein zeta isoform X2 [Cephus cinctus]	14.5305129157949	0.890832900616307	0.276198897551158	3.22533112374681	0.00125827045290133	0.020011620640291
Contig42951	ref|XP_012527361.1| PREDICTED: glycine-rich protein DOT1-like [Monomorium pharaonis]	10161.6050169632	0.890973176124206	0.285441603926941	3.12138512349536	0.00180002461053913	0.0266814446970875
Contig3608	#N/A	186.647774130251	0.890974098181146	0.2006918787777	4.43951246860392	9.01628912748429e-06	0.000340405076206752
Contig121070	ref|XP_012524543.1| PREDICTED: protein groucho-like, partial [Monomorium pharaonis]	120.795646512098	0.891307019230264	0.286668401600062	3.10919171508044	0.0018759994629994	0.0275248070080277
Contig83177	ref|XP_011067711.1| PREDICTED: cyclic AMP response element-binding protein A isoform X2 [Acromyrmex echinatior]	779.709083217225	0.892375215051882	0.300927368247175	2.96541727078444	0.00302272631801267	0.0404344058878448
Contig26502	#N/A	103.374478093297	0.892444487460077	0.279122589231994	3.19732089730049	0.00138710520997813	0.02160207693454
Contig21040	ref|XP_015522519.1| PREDICTED: transmembrane 9 superfamily member 3 [Neodiprion lecontei]	179.522723379092	0.893064665496995	0.183755600969147	4.8600677246673	1.17345602990481e-06	5.7616606096854e-05
Contig42731	#N/A	139.571521817099	0.893145592498973	0.219898010868099	4.06163561449723	4.87300969908705e-05	0.00136061012421658
Contig26342	ref|XP_011859744.1| PREDICTED: autophagy-related protein 13 isoform X1 [Vollenhovia emeryi]	469.011903213051	0.894300846793175	0.253017809069118	3.53453715405809	0.00040849000209585	0.00801692664894741
Contig59069	ref|XP_011629682.1| PREDICTED: EH domain-binding protein 1 isoform X5 [Pogonomyrmex barbatus]	535.504437787345	0.894463758821071	0.223460288722843	4.00278619495776	6.26008706608623e-05	0.00168443541146869
Contig29817	ref|XP_011881360.1| PREDICTED: aminoacylase-1-like [Vollenhovia emeryi]	593.022186593906	0.895050598422487	0.213810387183488	4.18618856741685	2.83677705335273e-05	0.000859679739247771
Contig99724	ref|XP_012524935.1| PREDICTED: protein transport protein Sec61 subunit alpha isoform 2 [Monomorium pharaonis]	141.336959540966	0.895784689135624	0.192027121720728	4.66488629891769	3.08787730622478e-06	0.000136403711076992
Contig8459	ref|XP_011636230.1| PREDICTED: LOW QUALITY PROTEIN: E3 ubiquitin-protein ligase HECW2 [Pogonomyrmex barbatus]	281.198849335152	0.895973446465807	0.218643275706655	4.09787789526121	4.16955115962244e-05	0.00119142332693013
Contig130426	ref|XP_011630318.1| PREDICTED: probable beta-hexosaminidase fdl isoform X1 [Pogonomyrmex barbatus]	466.530869388585	0.896192505917345	0.172958777573909	5.18153815890831	2.20063555837247e-07	1.24764628182744e-05
Contig93025	ref|XP_011883930.1| PREDICTED: zinc finger protein-like 1 [Vollenhovia emeryi]	31.8695525416648	0.898254512726243	0.205961200291975	4.36128023847626	1.29303626919385e-05	0.000457842873656542
Contig16981	ref|XP_012524543.1| PREDICTED: protein groucho-like, partial [Monomorium pharaonis]	73.0560903893615	0.898366271052596	0.300293262563997	2.99162979342949	0.00277492549049684	0.037707289125074
Contig13086	ref|XP_011160594.1| PREDICTED: dnaJ homolog subfamily C member 3 [Solenopsis invicta]	869.627582273072	0.898949458038771	0.177498394241958	5.06454980552309	4.09366604676454e-07	2.21531694838757e-05
Contig13591	ref|XP_011882351.1| PREDICTED: protein roadkill isoform X4 [Vollenhovia emeryi]	37.4655044164143	0.899503462044596	0.224763742822169	4.00199538746903	6.28105234664914e-05	0.00168873638568294
Contig27743	ref|XP_011706226.1| PREDICTED: baculoviral IAP repeat-containing protein 5-like [Wasmannia auropunctata]	23.4741647448146	0.899566513086082	0.276815874850663	3.24969264703978	0.00115529797576918	0.0187029461246223
Contig144034	ref|XP_017021020.1| PREDICTED: actin-1, partial [Drosophila kikkawai]	171.670533477286	0.899939824791022	0.184144672430452	4.88713473440788	1.02314077763479e-06	5.10493794768818e-05
Contig131994	#N/A	186.210711779298	0.900535862327974	0.279313078226412	3.224109189753	0.00126365207218404	0.0200774480427276
Contig17889	ref|XP_011869355.1| PREDICTED: conserved oligomeric Golgi complex subunit 8 [Vollenhovia emeryi]	51.8013629611799	0.900764091171121	0.279782652352661	3.21951373180823	0.00128408210567346	0.0203481550220613
Contig63662	ref|XP_012535090.1| PREDICTED: bromodomain adjacent to zinc finger domain protein 2B isoform X10 [Monomorium pharaonis]	460.97454524281	0.900877737065751	0.261196940963115	3.44903632387092	0.00056259101737872	0.0104057853560826
Contig21925	ref|XP_011173606.1| PREDICTED: calcium-binding mitochondrial carrier protein SCaMC-2 isoform X1 [Solenopsis invicta]	85.1754990622116	0.901118288284002	0.255715107155134	3.52391494702471	0.000425220718503562	0.00828413769848327
Contig141037	ref|XP_011868613.1| PREDICTED: coatomer subunit delta [Vollenhovia emeryi]	443.75984357766	0.901392403872754	0.22713308313063	3.96856499920067	7.23067357883534e-05	0.0019047796556336
Contig120916	ref|XP_011645719.1| PREDICTED: LOW QUALITY PROTEIN: probable ATP-dependent RNA helicase YTHDC2 [Pogonomyrmex barbatus]	731.553439844618	0.901759615010918	0.222632839542772	4.05043396501114	5.11227352778246e-05	0.00141839453282523
Contig13141	ref|XP_011868501.1| PREDICTED: transcriptional regulator ATRX homolog [Vollenhovia emeryi]	687.417701906794	0.902674260169489	0.218778835684701	4.12596701753364	3.69180179273665e-05	0.0010755405221989
Contig112599	#N/A	207.901033276864	0.903449971785758	0.302558046777818	2.98603848553135	0.00282617073042645	0.0383000217283953
Contig35792	ref|XP_012055759.1| PREDICTED: transmembrane emp24 domain-containing protein-like [Atta cephalotes]	65.4858576337071	0.905238048642321	0.266597869371737	3.39551869178699	0.000684986965625861	0.0122293078404931
Contig27334	#N/A	84.6751890870843	0.905376846876926	0.294116848403226	3.0782896382586	0.00208192458821311	0.0299467671940956
Contig41498	ref|XP_015114316.1| PREDICTED: DNA-directed RNA polymerases I, II, and III subunit RPABC4 [Diachasma alloeum]	44.6705713199175	0.905439994822498	0.290232920447049	3.11970121593318	0.00181034567751821	0.0267992815970914
Contig20377	ref|XP_011170244.1| PREDICTED: sodium leak channel non-selective protein [Solenopsis invicta]	40.8856519188489	0.905474358664454	0.222331334916713	4.07263492122535	4.64842564141621e-05	0.00130922449623057
Contig142799	ref|XP_011876797.1| PREDICTED: transmembrane emp24 domain-containing protein 2 [Vollenhovia emeryi]	512.191086015562	0.905622320491341	0.187691464011007	4.82505864218862	1.39962080044181e-06	6.75714400965169e-05
Contig132027	ref|XP_015174688.1| PREDICTED: heat shock 70 kDa protein cognate 4-like [Polistes dominula]	214.234335369515	0.905662880394257	0.31138138291179	2.90853252665661	0.00363129399332472	0.0467349258147888
Contig45557	ref|XP_012539062.1| PREDICTED: serine protease inhibitor 3/4-like isoform X3 [Monomorium pharaonis]	115.990068481763	0.905777936629008	0.235713898836017	3.84270058363909	0.000121687889331986	0.00296222965784742
Contig122109	ref|XP_011692183.1| PREDICTED: high choriolytic enzyme 1 isoform X2 [Wasmannia auropunctata]	13.9196284436475	0.906041047197399	0.272942795989096	3.31952724347997	0.000901700060150024	0.0152812893432328
Contig63072	ref|XP_011861496.1| PREDICTED: methyltransferase-like protein 22 isoform X1 [Vollenhovia emeryi]	69.3175501793661	0.906055948405693	0.245633092009738	3.68865587691162	0.000225441891782433	0.00492716788270472
Contig71372	#N/A	44.3529489744239	0.906078501649218	0.236847040732827	3.82558506471403	0.000130461874742768	0.00314426610892751
Contig57823	ref|XP_012220490.1| PREDICTED: sorting nexin-27 isoform X2 [Linepithema humile]	517.961353558093	0.906161065325203	0.2061426174502	4.39579683489811	1.10367127007534e-05	0.000401699612506703
Contig36517	ref|XP_011165813.1| PREDICTED: N-(5-amino-5-carboxypentanoyl)-L-cysteinyl-D-valine synthase [Solenopsis invicta]	532.795193529703	0.906275143860981	0.306874382978404	2.95324469597308	0.00314452595076918	0.0417197967598181
Contig129978	ref|XP_012540319.1| PREDICTED: JNK-interacting protein 3 isoform X2 [Monomorium pharaonis]	48.366043838124	0.907089336874679	0.223993466508201	4.0496240850912	5.12999713854581e-05	0.00142182593898784
Contig30759	ref|XP_011705990.1| PREDICTED: protein CWC15 homolog B [Wasmannia auropunctata]	268.420969774157	0.907207544920457	0.201828500057416	4.49494270958947	6.95886803878161e-06	0.000274656557104578
Contig69625	#N/A	31.8637946514605	0.907371409002737	0.223269634120411	4.06401619538366	4.82354767748083e-05	0.00135013538644765
Contig13529	ref|XP_011878217.1| PREDICTED: choline-phosphate cytidylyltransferase A-like isoform X1 [Vollenhovia emeryi]	2134.51922189401	0.908605826347466	0.248639293345797	3.65431309798575	0.000257871430966532	0.00551853814724559
Contig125459	ref|XP_012062036.1| PREDICTED: ABC transporter G family member 23-like, partial [Atta cephalotes]	289.700547495514	0.909465115739739	0.221770736811778	4.10092480556451	4.11502271026637e-05	0.00117882274995789
Contig101362	ref|XP_012060945.1| PREDICTED: ribosomal L1 domain-containing protein CG13096 [Atta cephalotes]	564.878424601923	0.90977406319381	0.202904047307215	4.48376498777439	7.33374302575488e-06	0.000287860557654044
Contig142867	ref|XP_011860747.1| PREDICTED: RNA-binding protein 4.1 isoform X2 [Vollenhovia emeryi]	279.357785263351	0.910126358223962	0.242953554567388	3.74609196331606	0.000179610770190768	0.00408549731443322
Contig7645	ref|XP_011156674.1| PREDICTED: zinc finger BED domain-containing protein 4-like [Solenopsis invicta]	9.20217506795326	0.910973530518202	0.312899846807365	2.91139014548332	0.00359824412181504	0.0464028412263051
Contig11366	ref|XP_011158207.1| PREDICTED: putative protein tag-278 [Solenopsis invicta]	64.2663669484583	0.911035318941074	0.248662622384213	3.66374049387051	0.000248558618264883	0.00534623766175636
Contig1444	ref|XP_011160264.1| PREDICTED: protein CDV3 homolog isoform X2 [Solenopsis invicta]	83.8179250770335	0.91127632620459	0.230943451138682	3.94588511478235	7.95057305212307e-05	0.00206711850822588
Contig16149	ref|XP_011879089.1| PREDICTED: uncharacterized protein LOC105568228 [Vollenhovia emeryi]	24606.2461553741	0.911516994102351	0.256246699474282	3.55718530608365	0.000374849741471511	0.00748342011481194
Contig2424	ref|XP_011692974.1| PREDICTED: ER degradation-enhancing alpha-mannosidase-like protein 2 [Wasmannia auropunctata]	401.976705570667	0.911856939476505	0.214701806832137	4.2470855412476	2.16569289158595e-05	0.000688785825045817
Contig14480	ref|XP_011707118.1| PREDICTED: signal peptidase complex catalytic subunit SEC11A [Wasmannia auropunctata]	444.223655925233	0.911963736613375	0.183993629046162	4.95649627294743	7.17757435827408e-07	3.69123841116034e-05
Contig15190	ref|XP_011051254.1| PREDICTED: choline/ethanolaminephosphotransferase 1 isoform X3 [Acromyrmex echinatior]	264.053672090178	0.912180423035229	0.212506533744156	4.29248177438833	1.76687057622129e-05	0.000583566454758097
Contig69217	ref|XP_011643248.1| PREDICTED: elongation of very long chain fatty acids protein AAEL008004-like isoform X2 [Pogonomyrmex barbatus]	35.749013133188	0.912456951658937	0.287577145696206	3.17291191360126	0.00150918305594116	0.0231335624781035
Contig78359	ref|XP_011860835.1| PREDICTED: ribosomal protein S6 kinase beta-1 [Vollenhovia emeryi]	24.287241718566	0.912520084244772	0.302179403424323	3.01979577000952	0.00252945185312111	0.0350208354884294
Contig6219	ref|XP_011875659.1| PREDICTED: protein argonaute-2-like [Vollenhovia emeryi]	1925.83240285227	0.912907742036596	0.193356814741399	4.72136316093924	2.34269218911351e-06	0.000106898337326527
Contig48294	ref|XP_011635309.1| PREDICTED: mitotic-spindle organizing protein 1-like isoform X1 [Pogonomyrmex barbatus]	31.4113059037175	0.913773191098567	0.233042830501295	3.9210525770433	8.8163022353946e-05	0.00225630121032422
Contig13085	ref|XP_011052695.1| PREDICTED: dnaJ homolog subfamily C member 3 [Acromyrmex echinatior]	103.135761042381	0.91397787253255	0.214713743905079	4.25672737995106	2.07441050794453e-05	0.000665056989655767
Contig73804	ref|XP_011064672.1| PREDICTED: KAT8 regulatory NSL complex subunit 3 [Acromyrmex echinatior]	48.46995051506	0.915317152928943	0.285951316198959	3.20095450196174	0.00136973158637781	0.0214055436703763
Contig28448	ref|XP_011057792.1| PREDICTED: putative inhibitor of apoptosis [Acromyrmex echinatior]	92.370847608082	0.916305277832423	0.299566365580845	3.05877222249484	0.00222246058280319	0.0316128350614927
Contig31294	#N/A	27.5689376596997	0.917754874685069	0.271492860854353	3.38040150226055	0.000723800125610079	0.0127676157953285
Contig87031	ref|XP_012228589.1| PREDICTED: phosphatidylcholine:ceramide cholinephosphotransferase 2-like isoform X2 [Linepithema humile]	32.7695652499367	0.918894367445121	0.261015317413706	3.52046146774094	0.000430796580486167	0.00836992084040846
Contig21538	ref|XP_011694117.1| PREDICTED: signal peptidase complex subunit 3 [Wasmannia auropunctata]	255.098181402839	0.919015546588436	0.211748842839366	4.34012074996607	1.42404442537055e-05	0.000495688810837274
Contig38732	ref|XP_011693423.1| PREDICTED: uncharacterized protein LOC105453291 isoform X3 [Wasmannia auropunctata]	124.92745404038	0.919655225682999	0.280158366383862	3.28262631437151	0.00102844898133851	0.0170009413124865
Contig27831	ref|XP_011707561.1| PREDICTED: cytosolic Fe-S cluster assembly factor NUBP2 homolog [Wasmannia auropunctata]	219.887572652242	0.919785336267123	0.164901498804	5.57778639332061	2.43598521059547e-08	1.65840210014906e-06
Contig49354	ref|XP_011635815.1| PREDICTED: cytosolic Fe-S cluster assembly factor NUBP2 homolog [Pogonomyrmex barbatus]	57.0348478501333	0.921565378819482	0.170358437841176	5.40956697242464	6.31773218789481e-08	3.97390043102582e-06
Contig15746	ref|XP_012056077.1| PREDICTED: geranylgeranyl pyrophosphate synthase-like [Atta cephalotes]	773.842325693518	0.921667786430345	0.222996880766566	4.1330972131182	3.57907253022171e-05	0.00104877342721151
Contig29836	ref|XP_011702790.1| PREDICTED: ribosome-releasing factor 2, mitochondrial [Wasmannia auropunctata]	855.439207669937	0.922184319508713	0.20753655935853	4.44347888564344	8.85158466450993e-06	0.000335026179931021
Contig94278	#N/A	29.1849040306239	0.922200165168088	0.284337124307831	3.24333365688009	0.00118139772644159	0.0190345813560236
Contig69242	ref|XP_014486558.1| PREDICTED: GMP reductase 1-like isoform X2 [Dinoponera quadriceps]	104.349573559644	0.922509549276193	0.314525660450541	2.93301839969034	0.00335683997534152	0.0439203566247916
Contig10080	#N/A	186.974925129589	0.922704502165061	0.193072268336055	4.7790628354717	1.7611415314435e-06	8.29289748767982e-05
Contig22703	ref|XP_012533669.1| PREDICTED: matrix metalloproteinase-14-like [Monomorium pharaonis]	204.704608985987	0.922987467257364	0.173879985884024	5.30818692309411	1.10721064436235e-07	6.70027953255492e-06
Contig2524	ref|XP_011169253.1| PREDICTED: E3 ubiquitin-protein ligase CBL isoform X2 [Solenopsis invicta]	51.3130849341848	0.923058275661969	0.245896606003215	3.75384715822349	0.000174141070380425	0.00398044279766912
Contig12546	ref|XP_011647452.1| PREDICTED: MIT domain-containing protein 1-like [Pogonomyrmex barbatus]	126.92292723473	0.924037863699392	0.187178557891373	4.93666515069343	7.9469743604103e-07	4.05615724844818e-05
Contig146837	ref|XP_011049136.1| PREDICTED: ATP-dependent RNA helicase bel [Acromyrmex echinatior]	644.320724284992	0.924522671440886	0.271900943443503	3.40021869630985	0.000673319768116154	0.0120607036102634
Contig7500	ref|XP_011866691.1| PREDICTED: activating signal cointegrator 1 complex subunit 2-like isoform X2 [Vollenhovia emeryi]	100.256880585096	0.925963025964309	0.29503458147652	3.13848980458584	0.00169820842701946	0.0254644889011297
Contig16962	ref|XP_011862962.1| PREDICTED: uncharacterized protein LOC105559353 isoform X2 [Vollenhovia emeryi]	58.7193920752662	0.926057922352607	0.268352938750848	3.4508954016427	0.000558730065273716	0.0103513140808784
Contig52673	#N/A	48.984435618157	0.926111143634789	0.280952139891668	3.29633062767163	0.00097956659707656	0.0163478888131849
Contig142046	#N/A	705.217885580127	0.926965606659214	0.192264311562232	4.82130874485862	1.42619418779547e-06	6.85128935826052e-05
Contig29763	#N/A	12.0430324874396	0.928114705500221	0.311277308146477	2.98163303655748	0.00286715443633611	0.0387392927896069
Contig22803	ref|XP_011166190.1| PREDICTED: rhotekin-like isoform X2 [Solenopsis invicta]	129.16826449565	0.928451497577527	0.277547080421879	3.34520361794567	0.000822221835494992	0.0141773416400277
Contig696	#N/A	9.97358522834666	0.928555413134334	0.266778489435812	3.48062325076531	0.000500248605251304	0.00948025633769568
Contig9447	#N/A	21.3291834349654	0.929081247219244	0.273383992319435	3.39844787303297	0.000677693761816448	0.0121246387618702
Contig37011	#N/A	174.469852599681	0.929368959367032	0.22692530633587	4.09548399150989	4.21287339001419e-05	0.00120253549129317
Contig49491	ref|XP_011864051.1| PREDICTED: mannosyl-oligosaccharide alpha-1,2-mannosidase isoform B-like isoform X5 [Vollenhovia emeryi]	118.167595705909	0.92936896414025	0.201594587980932	4.61008885927113	4.0249689548623e-06	0.000171864653603494
Contig14182	ref|XP_011059681.1| PREDICTED: heat shock 70 kDa protein cognate 4 [Acromyrmex echinatior]	323.116568534011	0.930897345261163	0.217487329898981	4.28023713240467	1.86694282473057e-05	0.000610669522993275
Contig134279	ref|XP_012531905.1| PREDICTED: AF4/FMR2 family member 4 [Monomorium pharaonis]	93.7202689494401	0.931533434038854	0.291937271668553	3.19086846538888	0.00141845841744537	0.0220019238045792
Contig7196	ref|XP_011158665.1| PREDICTED: uncharacterized threonine-rich GPI-anchored glycoprotein PJ4664.02-like isoform X2 [Solenopsis invicta]	86.0155488212781	0.931887587300542	0.215529365403279	4.3237151724401	1.53423353719002e-05	0.000523298659236637
Contig15955	ref|XP_006559248.1| PREDICTED: syndecan isoform X3 [Apis mellifera]	227.613842546148	0.932097053846392	0.270512931881597	3.44566541556087	0.000569655199936409	0.0105108703338543
Contig28087	#N/A	36.7181852119004	0.932709149568862	0.28157401900489	3.3124829942235	0.000924717477256084	0.015585960223789
Contig2569	ref|XP_011873060.1| PREDICTED: uncharacterized protein LOC105564903 [Vollenhovia emeryi]	25.6988478589925	0.932976064035753	0.296657639383417	3.14495883529202	0.00166110201349574	0.0250215137685451
Contig16844	ref|XP_012523667.1| PREDICTED: insulin-like growth factor 2 mRNA-binding protein 1, partial [Monomorium pharaonis]	509.161843380747	0.933072899031996	0.217801199876188	4.28405766158504	1.83515318527572e-05	0.000601722592040574
Contig17621	ref|XP_011864091.1| PREDICTED: polypeptide N-acetylgalactosaminyltransferase 5 isoform X1 [Vollenhovia emeryi]	430.681337614686	0.93312239902175	0.19369058350582	4.8175929987516	1.45300373689164e-06	6.96035495495666e-05
Contig67086	ref|XP_011862961.1| PREDICTED: uncharacterized protein LOC105559353 isoform X1 [Vollenhovia emeryi]	67.7297704563058	0.933663675623056	0.281616492485503	3.31537285825374	0.000915209627929751	0.0154564431484515
Contig25339	#N/A	347.824721491987	0.935379124313797	0.190272703438895	4.91599219125086	8.83339185817071e-07	4.46102405700904e-05
Contig833	#N/A	1248.13843517343	0.935844041682523	0.198261729036938	4.72024553719173	2.35560123425568e-06	0.000107415099456069
Contig14590	#N/A	23.0040294437423	0.936450771329036	0.294247575026633	3.18252672513707	0.00145996041441875	0.0225092168759645
Contig10832	ref|XP_011702196.1| PREDICTED: uncharacterized protein LOC105458524 isoform X2 [Wasmannia auropunctata]	35.3431806162115	0.939158717399444	0.268306620556576	3.50031883466479	0.00046470198547153	0.00890743393042206
Contig56701	ref|XP_012064556.1| PREDICTED: cell division cycle 5-like protein [Atta cephalotes]	106.711543303115	0.939496298629334	0.191938837353564	4.8947691440827	9.84211949832817e-07	4.92701806440117e-05
Contig12567	ref|XP_011882796.1| PREDICTED: E3 ubiquitin-protein ligase synoviolin A [Vollenhovia emeryi]	639.737425918573	0.939835223484972	0.171767870136659	5.47154262748462	4.46135000351836e-08	2.87557756357956e-06
Contig25518	ref|XP_011866399.1| PREDICTED: uncharacterized protein LOC105561224 [Vollenhovia emeryi]	234.188246405561	0.939972869335147	0.200387250437453	4.69078181013588	2.72163084430182e-06	0.000122053983240459
Contig107825	#N/A	437.957717283067	0.940007271808394	0.292923962960109	3.20904873165465	0.00133174918313956	0.0209517208494534
Contig148780	#N/A	25.7610728249812	0.940056851689316	0.259459100213032	3.6231407991374	0.000291047286846659	0.00607138698022193
Contig56424	ref|XP_011169036.1| PREDICTED: protein ariadne-2 isoform X2 [Solenopsis invicta]	185.696001668398	0.941759384195399	0.271603324959998	3.46740741975123	0.000525504728518725	0.00985150653211755
Contig5299	#N/A	51.5532464073302	0.941834155653933	0.263609218185907	3.57284226301114	0.000353127488201747	0.00711787027125324
Contig82145	ref|XP_011876983.1| PREDICTED: baculoviral IAP repeat-containing protein 7-B-like [Vollenhovia emeryi]	33.4191239103228	0.942611100289486	0.289366937834183	3.25749412612451	0.00112400584618635	0.0182836666456418
Contig20932	ref|XP_012226453.1| PREDICTED: leukotriene A-4 hydrolase [Linepithema humile]	40.9855307203574	0.942848444092027	0.236250797931134	3.99087940590517	6.58287485160658e-05	0.00175630531207117
Contig24531	ref|XP_011049927.1| PREDICTED: zinc finger CCHC domain-containing protein 8 homolog [Acromyrmex echinatior]	242.320838535719	0.943972505589801	0.217203925982371	4.34601953588267	1.38630227831979e-05	0.000484271707543186
Contig17623	ref|XP_011864092.1| PREDICTED: polypeptide N-acetylgalactosaminyltransferase 5 isoform X2 [Vollenhovia emeryi]	200.640439220605	0.944261874382861	0.191420480007364	4.93291979179311	8.10094270506971e-07	4.12542712732003e-05
Contig83246	ref|XP_016913309.1| PREDICTED: geranylgeranyl pyrophosphate synthase isoform X3 [Apis cerana]	120.498460595228	0.944516230516333	0.272481372434432	3.46635156039378	0.000527572957612842	0.00988071800493135
Contig8238	#N/A	25.727629250989	0.944694233560338	0.244974651357865	3.85629381784609	0.000115119109168497	0.00282208294844116
Contig100705	ref|XP_011864357.1| PREDICTED: UDP-glucose 4-epimerase [Vollenhovia emeryi]	78.8305809540874	0.94487346468809	0.210628587986146	4.48596970488279	7.25830550872524e-06	0.000285147115660563
Contig66233	ref|XP_011173700.1| PREDICTED: uncharacterized protein LOC105205865 [Solenopsis invicta]	968.997692861149	0.945293193787611	0.275000907321614	3.43741845434019	0.000587287527445333	0.0107875403964474
Contig147587	ref|XP_011629698.1| PREDICTED: translocation protein SEC63 homolog [Pogonomyrmex barbatus]	1119.49645900369	0.945505101696404	0.213261783408857	4.43354213109866	9.26973826731261e-06	0.000348228887917821
Contig59566	ref|XP_011165039.1| PREDICTED: protein FAM8A1 [Solenopsis invicta]	312.718546995815	0.945772655503147	0.198005398552942	4.77649933999284	1.78373138548616e-06	8.39052889737497e-05
Contig24743	ref|XP_011159641.1| PREDICTED: mitoferrin-1 isoform X3 [Solenopsis invicta]	47.6469934430335	0.946670212378468	0.303464651910155	3.11954030368829	0.00181133478820855	0.0268080711522552
Contig10411	ref|XP_011876820.1| PREDICTED: probable chitinase 3 [Vollenhovia emeryi]	125.485263831225	0.947288623048007	0.200797128118047	4.71764029658385	2.38595859839196e-06	0.00010861678058487
Contig66238	ref|XP_012541348.1| PREDICTED: vitellogenin-1-like [Monomorium pharaonis]	347.176435495418	0.947355646101435	0.287894991416278	3.29062913335515	0.000999636086109806	0.0166133147281489
Contig21788	ref|XP_011684960.1| PREDICTED: anaphase-promoting complex subunit 1 [Wasmannia auropunctata]	228.972372753757	0.948195411646481	0.235101751978503	4.03312779963112	5.5039326802796e-05	0.00151248293111132
Contig25697	ref|XP_011872643.1| PREDICTED: neurogenic locus Notch protein [Vollenhovia emeryi]	21.3986279232229	0.948669372040412	0.25174439276945	3.76838332565847	0.000164308252247571	0.00380052862362307
Contig116623	#N/A	20.8213842088911	0.948975158233294	0.297993420934735	3.18455070335641	0.00144978910349139	0.0223829348225047
Contig52932	ref|XP_012533362.1| PREDICTED: synapse-associated protein of 47 kDa isoform X3 [Monomorium pharaonis]	54.7046120345879	0.948982734005871	0.278016323620968	3.41340652824278	0.000641561621510662	0.01159444799301
Contig17285	ref|XP_011883269.1| PREDICTED: rap1 GTPase-GDP dissociation stimulator 1 [Vollenhovia emeryi]	115.011683590862	0.949185991233921	0.220797718826813	4.29889401157461	1.71652528969797e-05	0.000570271584118324
Contig57707	#N/A	46.337645803867	0.949546152722942	0.318228484143222	2.98385028379669	0.00284646014084059	0.0385403200419286
Contig44674	#N/A	22.112309738568	0.949547213989688	0.258336875819793	3.67561623162177	0.000237275981051329	0.0051418895644447
Contig138534	ref|XP_011069065.1| PREDICTED: mitoferrin-1 [Acromyrmex echinatior]	298.365932709237	0.949787941341011	0.289341497747196	3.28258458857797	0.00102860120244924	0.0170009413124865
Contig38348	ref|XP_011877238.1| PREDICTED: kinase D-interacting substrate of 220 kDa isoform X2 [Vollenhovia emeryi]	105.915738476316	0.950216275000749	0.254844073339894	3.72861829803439	0.000192532522483569	0.00432651705465577
Contig2066	#N/A	240.227730948079	0.950647790405599	0.234772063298704	4.04923727741863	5.13848266640461e-05	0.00142388677630118
Contig7853	ref|XP_011049136.1| PREDICTED: ATP-dependent RNA helicase bel [Acromyrmex echinatior]	873.793101168533	0.950734931411918	0.278318987855196	3.41599018715377	0.000635505370090796	0.0115064653216947
Contig94282	#N/A	46.4370462810227	0.951250792622626	0.235853988150422	4.03321902708697	5.50179549248482e-05	0.00151220205496116
Contig126970	ref|XP_011866925.1| PREDICTED: prominin-like protein isoform X4 [Vollenhovia emeryi]	92.823029092956	0.951938955502639	0.299687020512426	3.17644372410573	0.00149092713160906	0.0229007353070598
Contig63152	ref|XP_012527021.1| PREDICTED: putative cystathionine gamma-lyase 2 [Monomorium pharaonis]	45.6337536444892	0.95261640662608	0.299386263953691	3.18189750607072	0.00146313587058622	0.0225453593857152
Contig56448	ref|XP_011875659.1| PREDICTED: protein argonaute-2-like [Vollenhovia emeryi]	54.8188580397614	0.952776167798961	0.19850790377891	4.79968882679918	1.58912344618836e-06	7.55019985032435e-05
Contig125498	#N/A	227.493167680296	0.953492826430453	0.284456418574331	3.35198211103574	0.000802352031101151	0.0139036759961349
Contig34597	#N/A	21.6893762285836	0.953510135206943	0.308502477919778	3.09076977804662	0.00199638357183214	0.0289341616838048
Contig69549	ref|XP_012061429.1| PREDICTED: uncharacterized protein LOC105624684 [Atta cephalotes]	403.353491966945	0.953649122188109	0.311632711773179	3.06017014953879	0.00221211279151861	0.0314953768093444
Contig127284	#N/A	835.291264054957	0.954175748027781	0.185562283522911	5.1420780662573	2.71716161893379e-07	1.51266484314485e-05
Contig16661	ref|XP_012525153.1| PREDICTED: protein transport protein Sec61 subunit gamma [Monomorium pharaonis]	497.662224966514	0.954208438366055	0.190743551567902	5.00257246193914	5.6570307543091e-07	2.9769987144543e-05
Contig117203	ref|XP_011161660.1| PREDICTED: protein lifeguard 1 isoform X1 [Solenopsis invicta]	308.115916479525	0.95427643940886	0.224030994679698	4.25957328258623	2.04817541185329e-05	0.000659452184955063
Contig103763	ref|XP_011867404.1| PREDICTED: GMP reductase 1-like [Vollenhovia emeryi]	136.958148449946	0.954745021368784	0.320417068778557	2.97969463676923	0.00288535858448503	0.0389387022665292
Contig98384	#N/A	33.3563903840671	0.955146323041109	0.258939939940147	3.68867901669356	0.000225421392631688	0.00492716788270472
Contig16696	ref|XP_011875546.1| PREDICTED: matrix metalloproteinase-14 isoform X3 [Vollenhovia emeryi]	54.8778943648617	0.955631270735471	0.23721823714487	4.02848989284017	5.61362736818265e-05	0.00153823207808895
Contig17627	ref|XP_011864092.1| PREDICTED: polypeptide N-acetylgalactosaminyltransferase 5 isoform X2 [Vollenhovia emeryi]	47.9589107336407	0.955647164662982	0.251777400644565	3.79560342674311	0.000147284776003269	0.00347855757800546
Contig66232	ref|XP_011706280.1| PREDICTED: vitellogenin-1-like, partial [Wasmannia auropunctata]	1693.19926940491	0.956139618766449	0.271425373916641	3.52266114611706	0.000427237221876802	0.00831625500324396
Contig135833	#N/A	302.518704705905	0.956209955621623	0.224040307938271	4.26802642980247	1.97209966760944e-05	0.00063905453840666
Contig111393	ref|XP_011876139.1| PREDICTED: dual 3',5'-cyclic-AMP and -GMP phosphodiesterase 11 isoform X2 [Vollenhovia emeryi]	660.458279639513	0.957005382021787	0.249546447011744	3.8349789928155	0.00012557502673309	0.00304591874000737
Contig108287	ref|XP_011156607.1| PREDICTED: uncharacterized protein LOC105193736 isoform X1 [Solenopsis invicta]	679.958952228476	0.957327430816349	0.208611365816538	4.58904732764303	4.45273475962235e-06	0.00018729937087203
Contig145093	ref|XP_012062594.1| PREDICTED: signal-induced proliferation-associated 1-like protein 1 [Atta cephalotes]	61.0791050398091	0.957612657020514	0.255694629665492	3.74514184468127	0.000180291883225749	0.00409755378779566
Contig25216	ref|XP_011160258.1| PREDICTED: prolyl 3-hydroxylase OGFOD1 [Solenopsis invicta]	147.700462165503	0.958480826807732	0.197120767323345	4.86240409786706	1.1596856917114e-06	5.70230657707575e-05
Contig73919	ref|XP_012063843.1| PREDICTED: protein disulfide-isomerase [Atta cephalotes]	1263.30912301295	0.959996756533109	0.205463433513416	4.67234845693565	2.97775209581563e-06	0.000132098420910023
Contig30686	#N/A	35.0982919471372	0.960575953574093	0.213814333840283	4.49257042931291	7.03686355088447e-06	0.000277401980691624
Contig132088	ref|XP_011636564.1| PREDICTED: murinoglobulin-1-like, partial [Pogonomyrmex barbatus]	942.832496113652	0.961022105259217	0.319641309442384	3.00656416073293	0.00264218288347654	0.0362265685532087
Contig141230	#N/A	36.7221500740351	0.961103235098787	0.272620131383089	3.52543016622728	0.000422795632910047	0.00824885341831871
Contig23355	ref|XP_011066875.1| PREDICTED: protein tiptop isoform X1 [Acromyrmex echinatior]	115.377328898224	0.961513841205826	0.194175728044094	4.95177152618933	7.35409164487835e-07	3.77628846773394e-05
Contig15641	ref|XP_012275907.1| PREDICTED: TATA-binding protein-associated factor 2N-like [Orussus abietinus]	28.1136254956742	0.961620777155971	0.319237213941943	3.01224523695678	0.00259323005596314	0.0356997564520744
Contig83422	ref|XP_011163408.1| PREDICTED: serine/threonine-protein kinase pelle [Solenopsis invicta]	167.76912732399	0.962079691022341	0.2272378480136	4.23380039651123	2.29774903697703e-05	0.000721813615706748
Contig23010	#N/A	17.7334356436138	0.962632514070693	0.276771836217469	3.47807250631643	0.000505033295860957	0.00955624185640963
Contig29737	#N/A	1618.74840989676	0.962825960009158	0.167488354735027	5.74861435311359	8.99777821726646e-09	6.44258022785836e-07
Contig9260	#N/A	19.9661141318381	0.96288479342063	0.326792367862267	2.94647270901521	0.00321420780890108	0.0424659636063662
Contig134043	ref|XP_011632487.1| PREDICTED: ceramide glucosyltransferase [Pogonomyrmex barbatus]	68.7742718342326	0.963603791763401	0.244881746916253	3.93497597880556	8.32050175799615e-05	0.00214479476413018
Contig105920	#N/A	87.3389303525168	0.964584863269272	0.308133201791145	3.13041521544009	0.00174559380117926	0.0260196700102357
Contig1136	#N/A	137.1637775503	0.965311723297838	0.302987795044433	3.18597560392251	0.00144266762003597	0.0223034572074279
Contig136572	#N/A	155.407712684127	0.965561844542766	0.221958345727581	4.35019391308601	1.36017196046837e-05	0.000477006362159186
Contig123483	#N/A	459.905032725402	0.966013521282916	0.223642329228226	4.31945743284181	1.56413273906887e-05	0.000530693763512849
Contig98011	ref|XP_011873751.1| PREDICTED: microtubule-associated protein tau isoform X1 [Vollenhovia emeryi]	25.4221536091906	0.96766700029871	0.212318569861716	4.55761830408408	5.17369497806532e-06	0.000212871805447618
Contig8225	ref|XP_011861495.1| PREDICTED: protein disulfide-isomerase [Vollenhovia emeryi]	9057.71679075201	0.968367458568454	0.197568426747161	4.90142820141867	9.51424221351285e-07	4.77654782180956e-05
Contig112348	ref|XP_011880495.1| PREDICTED: vacuolar protein sorting-associated protein 53 homolog [Vollenhovia emeryi]	33.122373365096	0.968517151162158	0.225340545400331	4.29801547449674	1.72334134510901e-05	0.000572011769574913
Contig30948	ref|XP_015435775.1| PREDICTED: zinc finger protein 235-like [Dufourea novaeangliae]	14.9572175599032	0.968783549892533	0.324064751552031	2.98947523682466	0.00279457098923959	0.0379507437811644
Contig79823	#N/A	160.940921098689	0.968958387119791	0.239950875934378	4.03815315675189	5.38736760733452e-05	0.00148405945704055
Contig27701	#N/A	79.0264549572552	0.969112775126172	0.266927947077106	3.63061562394675	0.000282746003498291	0.00593473402235215
Contig23488	ref|XP_011156622.1| PREDICTED: uncharacterized protein LOC105193745 [Solenopsis invicta]	30.1369656878326	0.969537626258389	0.267752944780841	3.62101573542717	0.000293448664278876	0.00611114053401651
Contig113098	ref|XP_012527021.1| PREDICTED: putative cystathionine gamma-lyase 2 [Monomorium pharaonis]	98.0961473403784	0.972170420795643	0.229859658824928	4.22940861291409	2.34306433988898e-05	0.000732814347863324
Contig3903	#N/A	65.4743725668053	0.974171388558057	0.332253330316188	2.93201391730518	0.00336771654719847	0.0440244372307474
Contig25408	ref|XP_012541748.1| PREDICTED: serine protease snake-like isoform X4 [Monomorium pharaonis]	682.906450494471	0.974446809062799	0.320513576084804	3.04026687719765	0.00236368598738251	0.0332243896655153
Contig71367	ref|XP_011641476.1| PREDICTED: vesicle transport protein SEC20 [Pogonomyrmex barbatus]	126.378568626458	0.974595096931111	0.252566178634991	3.85877120285213	0.000113958560930326	0.00279970584818937
Contig121080	ref|XP_011877941.1| PREDICTED: phosphoinositide 3-kinase regulatory subunit 4 isoform X1 [Vollenhovia emeryi]	226.367465524448	0.974791507960914	0.301514785056448	3.23298078990859	0.00122505800230631	0.019586554185255
Contig8971	ref|XP_011688185.1| PREDICTED: thyrotropin-releasing hormone-degrading ectoenzyme-like [Wasmannia auropunctata]	408.379853972317	0.974815831991652	0.230850387823985	4.22271689114472	2.41374935374027e-05	0.000751465116754209
Contig141036	ref|XP_011868613.1| PREDICTED: coatomer subunit delta [Vollenhovia emeryi]	273.927902410172	0.97536272850601	0.209617567401888	4.65305814104788	3.2704798284165e-06	0.000143627866402485
Contig113325	ref|XP_014295640.1| PREDICTED: cyclin-K [Microplitis demolitor]	221.106888034854	0.975903429955855	0.311484748565161	3.13306970710864	0.0017298835370517	0.0258337656638838
Contig31324	#N/A	987.923678325696	0.976442133746058	0.265453411401304	3.67839361563112	0.000234707551025939	0.00509518646147458
Contig15878	ref|XP_012526944.1| PREDICTED: uncharacterized protein LOC105831398 [Monomorium pharaonis]	90.1079999611126	0.978975774198694	0.263241640448966	3.71892445484317	0.0002000728727317	0.0044699641783586
Contig2439	ref|XP_011882869.1| PREDICTED: bifunctional glutamate/proline--tRNA ligase [Vollenhovia emeryi]	85.729638791532	0.979149769567876	0.336549999132295	2.90937385854213	0.00362153498544882	0.0466322489096711
Contig95886	#N/A	131.267125832999	0.980758290341577	0.256592728408525	3.82223727236767	0.000132246347687984	0.00317761449244476
Contig19096	ref|XP_011161412.1| PREDICTED: uncharacterized protein LOC105196944 [Solenopsis invicta]	53.1471408298434	0.98125950356662	0.282935586226076	3.46813745366961	0.000524079150936605	0.00983226466065064
Contig111567	ref|XP_011165618.1| PREDICTED: mediator of RNA polymerase II transcription subunit 15 [Solenopsis invicta]	33.0257403573101	0.981327983054134	0.268233968815309	3.65847766182748	0.00025371785007303	0.00544339384904348
Contig144641	ref|XP_011689814.1| PREDICTED: replication factor C subunit 2 [Wasmannia auropunctata]	21.6391404396952	0.98133982200183	0.250959887327023	3.91034532432292	9.21642634645728e-05	0.00234103098435748
Contig16151	ref|XP_011879089.1| PREDICTED: uncharacterized protein LOC105568228 [Vollenhovia emeryi]	22844.2555565156	0.982398391720806	0.279196516091313	3.51866278803961	0.000433727627119039	0.00841963046437466
Contig56871	ref|XP_011159662.1| PREDICTED: phosphatidylglycerophosphatase and protein-tyrosine phosphatase 1 isoform X2 [Solenopsis invicta]	149.621322260292	0.982756890468847	0.226338017591792	4.34198770902589	1.41199434019755e-05	0.000491746791092836
Contig111953	ref|XP_011306952.1| PREDICTED: AP-3 complex subunit sigma-2 isoform X2 [Fopius arisanus]	48.8442074269341	0.982840095784082	0.225409150671609	4.36024931931866	1.29914336274026e-05	0.000459525372964679
Contig130451	ref|XP_011868356.1| PREDICTED: solute carrier family 25 member 36-A [Vollenhovia emeryi]	411.170530131495	0.983690999483219	0.23408555309074	4.20227129139364	2.64250175523983e-05	0.000808574533021422
Contig80912	ref|XP_011694637.1| PREDICTED: protein NPC2 homolog [Wasmannia auropunctata]	101.533251510597	0.983830527395687	0.261555193724536	3.76146431422744	0.000168921524508597	0.00388800468851134
Contig87131	ref|XP_011647483.1| PREDICTED: carboxypeptidase D-like [Pogonomyrmex barbatus]	45.6344546024365	0.984263687196258	0.21880310879051	4.4983990064722	6.84671076458773e-06	0.000271335427711514
Contig144973	ref|XP_011063777.1| PREDICTED: bifunctional glutamate/proline--tRNA ligase [Acromyrmex echinatior]	60.3432509824166	0.984371830273375	0.227735318688203	4.32243815295553	1.54314348365911e-05	0.000525544601689971
Contig123020	ref|XP_011865172.1| PREDICTED: vanin-like protein 1 isoform X1 [Vollenhovia emeryi]	1578.22105808378	0.98601562491831	0.211906643368004	4.65306612971997	3.27035307417101e-06	0.000143627866402485
Contig36446	ref|XP_011067388.1| PREDICTED: LOW QUALITY PROTEIN: histidine--tRNA ligase, cytoplasmic [Acromyrmex echinatior]	148.332924818344	0.986429977207217	0.229088026280988	4.30589932272283	1.66308686915048e-05	0.000554419524761488
Contig2648	ref|XP_012062448.1| PREDICTED: transmembrane protease serine 9-like [Atta cephalotes]	161.039609483834	0.986931362602757	0.295418119572591	3.34079495201798	0.000835388947295543	0.0143641988967336
Contig13130	ref|XP_011156622.1| PREDICTED: uncharacterized protein LOC105193745 [Solenopsis invicta]	31.0023857585058	0.987025748168292	0.270399550125256	3.65024922456815	0.000261985983711496	0.00559247083189843
Contig11465	ref|XP_011866961.1| PREDICTED: actin-binding Rho-activating protein-like isoform X2 [Vollenhovia emeryi]	64.0250667230401	0.987108422604265	0.318367700233379	3.1005294251919	0.00193175019098069	0.0281418380491627
Contig17625	ref|XP_011703052.1| PREDICTED: polypeptide N-acetylgalactosaminyltransferase 5 isoform X2 [Wasmannia auropunctata]	34.2973475363788	0.987317031148318	0.252053887016927	3.91708710717885	8.96253705130483e-05	0.00228713897125492
Contig134489	#N/A	38.7866169310981	0.987452345283227	0.244308672840824	4.04182272287397	5.30373237555706e-05	0.00146310081850853
Contig89132	#N/A	211.043206812702	0.987917856118871	0.272892163724131	3.6201767124305	0.000294401882526763	0.00612816836484795
Contig90217	ref|XP_011690342.1| PREDICTED: probable ATP-dependent RNA helicase DDX49 [Wasmannia auropunctata]	51.4019986805733	0.988391475147096	0.291365849530888	3.39226946719545	0.0006931623392796	0.0123346696600267
Contig49838	ref|XP_011688166.1| PREDICTED: probable ATP-dependent RNA helicase pitchoune [Wasmannia auropunctata]	46.4856761831526	0.989993708695769	0.319039436645071	3.10304493734776	0.00191540553874046	0.0279614024818197
Contig134567	ref|XP_011870790.1| PREDICTED: uncharacterized protein LOC105563645 [Vollenhovia emeryi]	22.9681085564677	0.990235677987349	0.325877331200493	3.03867616179205	0.00237620132737971	0.0333715015707702
Contig137113	ref|XP_015439266.1| PREDICTED: uncharacterized protein LOC107194192 [Dufourea novaeangliae]	81.5733814996274	0.991829334000157	0.229629905940185	4.3192515797943	1.56559229136405e-05	0.000530923313330943
Contig108783	ref|XP_011159626.1| PREDICTED: zinc finger protein 598 [Solenopsis invicta]	41.0378905138622	0.992403911169061	0.23841514312706	4.16250368224376	3.14777064159956e-05	0.000942135881240084
Contig94712	ref|XP_011700294.1| PREDICTED: histone demethylase UTY-like isoform X2 [Wasmannia auropunctata]	136.591109904191	0.992680630419167	0.188858084179606	5.25622524834637	1.47042180278609e-07	8.67376173827894e-06
Contig30258	#N/A	210.929843131979	0.992809247994638	0.209251009600136	4.74458522275151	2.08934003616097e-06	9.65725152228813e-05
Contig105679	ref|XP_012221530.1| PREDICTED: uncharacterized protein LOC105671710 isoform X1 [Linepithema humile]	92.7744491710993	0.992824552030196	0.269060115141876	3.6899729694484	0.000224277881637401	0.00490726373674969
Contig28120	ref|XP_011063314.1| PREDICTED: arginine--tRNA ligase, cytoplasmic [Acromyrmex echinatior]	638.624070249003	0.992927930161419	0.22030510018298	4.50705829931635	6.57325774706666e-06	0.000261952916870614
Contig18730	ref|XP_011864266.1| PREDICTED: tetraspanin-1-like isoform X1 [Vollenhovia emeryi]	4762.83548330015	0.993275702744222	0.232844647186981	4.26583009205529	1.9916031004219e-05	0.000644604445968057
Contig111346	ref|XP_012060342.1| PREDICTED: elongation of very long chain fatty acids protein AAEL008004 [Atta cephalotes]	36.4503853672483	0.993490978761868	0.29218244349058	3.40024187248574	0.000673262696563907	0.0120607036102634
Contig46295	ref|XP_012522882.1| PREDICTED: cytochrome c [Monomorium pharaonis]	173.873871550329	0.993546956260498	0.265370639838343	3.7439972894731	0.000181115607118225	0.00411351732435621
Contig21456	ref|XP_012064513.1| PREDICTED: serine/threonine-protein phosphatase 2A catalytic subunit beta isoform [Atta cephalotes]	140.233686415312	0.993964090357886	0.178821390419408	5.55841830793645	2.72230319742392e-08	1.8394739701816e-06
Contig60200	ref|XP_011066270.1| PREDICTED: transcription factor kayak isoform X3 [Acromyrmex echinatior]	105.400741595693	0.995360668146678	0.158122724828692	6.29486159706037	3.07674254274249e-10	2.78910002133342e-08
Contig137013	ref|XP_011176356.1| PREDICTED: protein transport protein Sec24C [Solenopsis invicta]	969.522883312362	0.995538839756343	0.208256426539238	4.78035110992733	1.74989314112965e-06	8.24279292952957e-05
Contig94960	ref|XP_011868676.1| PREDICTED: OTU domain-containing protein 6B isoform X2 [Vollenhovia emeryi]	223.456739929753	0.995626637549679	0.27742226768585	3.58884903455953	0.000332141096600246	0.00675915106157649
Contig5403	ref|XP_011874734.1| PREDICTED: alpha-2-macroglobulin-like protein 1 isoform X1 [Vollenhovia emeryi]	11220.1948585276	0.995896204013549	0.330926638633307	3.00941685482468	0.00261749711133746	0.0359426137360185
Contig23161	ref|XP_012059975.1| PREDICTED: protein canopy homolog 2 [Atta cephalotes]	367.314645319375	0.996283746679306	0.252477184647701	3.94603475981202	7.94560839143568e-05	0.00206622384735601
Contig23760	ref|XP_011645007.1| PREDICTED: RNA-binding protein 33-like [Pogonomyrmex barbatus]	141.519386923596	0.996718806940528	0.209822322254163	4.75029918758205	2.03115909040526e-06	9.41399893664453e-05
Contig127749	ref|XP_011882869.1| PREDICTED: bifunctional glutamate/proline--tRNA ligase [Vollenhovia emeryi]	105.721967085953	0.997369729974608	0.226172163964091	4.40978108222441	1.03475170455901e-05	0.000380702164031647
Contig10903	ref|XP_011874735.1| PREDICTED: alpha-2-macroglobulin-like protein 1 isoform X2 [Vollenhovia emeryi]	1852.41095481745	0.997872928165226	0.323192499146118	3.08754977544847	0.00201813970538725	0.0291965007474276
Contig117293	ref|XP_012539441.1| PREDICTED: uncharacterized protein LOC105838433 isoform X1 [Monomorium pharaonis]	112.873982442045	0.99805664056094	0.268910470520707	3.71148300260806	0.000206048506221316	0.00458383565004882
Contig44750	ref|XP_011867333.1| PREDICTED: proclotting enzyme-like [Vollenhovia emeryi]	63.1414996023174	0.998385660448315	0.304631781597378	3.27735226841121	0.00104785548330049	0.0172707673204074
Contig150089	ref|XP_012226453.1| PREDICTED: leukotriene A-4 hydrolase [Linepithema humile]	24.6969037407519	0.998928144029973	0.195606105671702	5.10683519105758	3.27599237346217e-07	1.80451027512063e-05
Contig16596	ref|XP_011881360.1| PREDICTED: aminoacylase-1-like [Vollenhovia emeryi]	2215.02160870734	0.999747326543665	0.206787743859665	4.8346546457905	1.33376984158418e-06	6.47147990327717e-05
Contig83178	ref|XP_012055063.1| PREDICTED: cyclic AMP response element-binding protein A-like [Atta cephalotes]	146.588606598082	1.00057776475983	0.304339796933325	3.28769939009663	0.00101009632672437	0.0167582848910151
Contig63149	ref|XP_011155743.1| PREDICTED: solute carrier family 35 member E2-like [Solenopsis invicta]	28.434763115843	1.00103327048965	0.293984402029834	3.4050557226096	0.000661505542337341	0.0118820414064286
Contig87068	ref|XP_011698080.1| PREDICTED: uncharacterized protein LOC105456012 [Wasmannia auropunctata]	506.577249850402	1.00188938158939	0.275594995472235	3.63536855911568	0.000277583498133857	0.00584537399315604
Contig18917	ref|XP_012537230.1| PREDICTED: myelin expression factor 2-like isoform X1 [Monomorium pharaonis]	143.833112705853	1.00196491039964	0.292760561770757	3.42247229045906	0.000620544224399952	0.0112948697161142
Contig2650	ref|XP_011685317.1| PREDICTED: rhophilin-2 isoform X2 [Wasmannia auropunctata]	331.16353963796	1.00328970093779	0.340462374348012	2.94684457528998	0.0032103451938512	0.042437640424889
Contig25413	ref|XP_012063127.1| PREDICTED: uncharacterized protein LOC105626433 [Atta cephalotes]	35.1671160590157	1.0033137661847	0.296797497536648	3.38046571993354	0.000723631010994872	0.0127674157715424
Contig138061	ref|XP_015602094.1| PREDICTED: 40S ribosomal protein S3a [Cephus cinctus]	26.418301309218	1.00418322502489	0.295323058640608	3.40028723001587	0.000673151016230377	0.0120607036102634
Contig66227	ref|XP_012541348.1| PREDICTED: vitellogenin-1-like [Monomorium pharaonis]	3486.12236220125	1.00457704305564	0.267161083258613	3.76019228101123	0.000169782806465873	0.00390385308851524
Contig5273	ref|XP_011861621.1| PREDICTED: filaggrin-2-like [Vollenhovia emeryi]	885.501467955846	1.00676207183383	0.307849691802777	3.27030397834152	0.00107431970761728	0.0176170245258537
Contig148264	ref|XP_011870333.1| PREDICTED: exonuclease mut-7 homolog isoform X1 [Vollenhovia emeryi]	177.346536563824	1.00702832072231	0.193534225442399	5.2033603793869	1.95716807497881e-07	1.12085891604804e-05
Contig146078	#N/A	28.82868200733	1.00741648451025	0.248325397903447	4.05684031120309	4.97410660087156e-05	0.00138456176636001
Contig36893	#N/A	16.8151447665501	1.00848486929423	0.331185636612882	3.04507429612062	0.00232622837105367	0.0327896408182177
Contig66241	ref|XP_011879025.1| PREDICTED: vitellogenin-1-like [Vollenhovia emeryi]	533.843688273961	1.00988243136608	0.276787127713566	3.64858886216399	0.000263684697820806	0.00562188761253702
Contig40777	#N/A	113.513522670176	1.00994052852078	0.302736810544893	3.33603477787521	0.000849825319240092	0.0145588947503064
Contig97355	ref|XP_011686976.1| PREDICTED: valine--tRNA ligase isoform X2 [Wasmannia auropunctata]	260.020893206486	1.01003792446634	0.238824610714432	4.22920368819973	2.34519942448636e-05	0.000733016511657189
Contig11393	ref|XP_011858808.1| PREDICTED: RNA-binding protein 33-like isoform X2 [Vollenhovia emeryi]	117.001698815178	1.01051933759805	0.204281760780118	4.94669388857357	7.54845385081164e-07	3.86876802919112e-05
Contig85827	ref|XP_011875226.1| PREDICTED: zinc finger protein 628 [Vollenhovia emeryi]	28.7193124559727	1.01129760370721	0.284041011931977	3.56039290533649	0.000370300312434987	0.00740458663676766
Contig66128	ref|XP_011051181.1| PREDICTED: AF4/FMR2 family member 4 [Acromyrmex echinatior]	42.3390557469175	1.01326748873014	0.270403843052655	3.74723775110264	0.000178792605568555	0.00407166757541126
Contig20368	ref|XP_011159622.1| PREDICTED: tryptophan--tRNA ligase, cytoplasmic [Solenopsis invicta]	170.365221037862	1.01371551075125	0.239646339433383	4.2300479662993	2.33641487921919e-05	0.000731565895976633
Contig30301	ref|XP_011875993.1| PREDICTED: uncharacterized protein LOC105566530 [Vollenhovia emeryi]	68.8618777286047	1.01393456807323	0.257727111779776	3.93414011072153	8.34950699956802e-05	0.00215063635752976
Contig34850	ref|XP_011052261.1| PREDICTED: protein O-mannosyl-transferase 2 isoform X1 [Acromyrmex echinatior]	269.389554650119	1.01400418164873	0.281198282182942	3.60601129486645	0.000310939608271712	0.00640166449615302
Contig19964	ref|XP_011164165.1| PREDICTED: aquaporin AQPAn.G-like isoform X1 [Solenopsis invicta]	805.917532132212	1.01449755948004	0.217271483102808	4.6692623670268	3.02283128737558e-06	0.000133748203003639
Contig9010	ref|XP_014483481.1| PREDICTED: uncharacterized protein LOC106749000 isoform X5 [Dinoponera quadriceps]	136.432577031153	1.01569252397761	0.209579667124347	4.84633141141015	1.25765362988077e-06	6.13067718773008e-05
Contig93556	#N/A	101.453953104921	1.01582214410998	0.252388861003484	4.02482954307545	5.70165995674365e-05	0.0015582928524261
Contig146688	ref|XP_011861495.1| PREDICTED: protein disulfide-isomerase [Vollenhovia emeryi]	632.903453690739	1.01665743963521	0.219150608364961	4.63908107406269	3.49961756242215e-06	0.000152358631175062
Contig8294	ref|XP_011692809.1| PREDICTED: uncharacterized protein LOC105452946 isoform X2 [Wasmannia auropunctata]	442.822773442286	1.01675617176543	0.268805967879482	3.78249106515853	0.000155266668296983	0.00363416188374647
Contig65182	#N/A	12.6728246164518	1.01740451089324	0.304125528230396	3.34534399927944	0.000821805746969283	0.0141737714065232
Contig3045	#N/A	64.3499267746125	1.01880577865466	0.222992862508311	4.5687820103062	4.90566675026997e-06	0.000203324294214887
Contig23190	ref|XP_011876909.1| PREDICTED: dorsal-ventral patterning protein Sog [Vollenhovia emeryi]	188.390521888203	1.01883422884972	0.317524373645283	3.20868038303066	0.00133345634568774	0.0209712801651511
Contig87128	ref|XP_011874735.1| PREDICTED: alpha-2-macroglobulin-like protein 1 isoform X2 [Vollenhovia emeryi]	504.99958658311	1.02038755384461	0.326067671253097	3.12937357427431	0.00175179437832593	0.0260977526993621
Contig1693	ref|XP_011691120.1| PREDICTED: protein abrupt-like isoform X2 [Wasmannia auropunctata]	32.3865193806188	1.0208858483773	0.174218879673548	5.85978884889074	4.63456085689069e-09	3.48205726341482e-07
Contig21164	ref|XP_012058723.1| PREDICTED: adenylate cyclase type 8 [Atta cephalotes]	166.634962297674	1.02131574363407	0.264050756152993	3.86787661021622	0.000109787190257766	0.00271344633125873
Contig2937	#N/A	793.009698006253	1.02172454721634	0.260633760170204	3.92015426761718	8.84923039808437e-05	0.00226259338462635
Contig55507	ref|XP_011051564.1| PREDICTED: protein toll [Acromyrmex echinatior]	55.5759883220808	1.02330608717885	0.315859355143454	3.23975234709796	0.00119633555888132	0.0192142352344186
Contig5398	ref|XP_011879984.1| PREDICTED: AF4/FMR2 family member 4 isoform X2 [Vollenhovia emeryi]	925.683055496469	1.02374697966896	0.239034183709486	4.28284759853926	1.84516558618801e-05	0.000604420980206039
Contig31258	ref|XP_012532713.1| PREDICTED: Bardet-Biedl syndrome 7 protein homolog [Monomorium pharaonis]	73.2548624676584	1.0239250455034	0.236646482769267	4.32681286246596	1.51282385062729e-05	0.0005176888561165
Contig25994	ref|XP_011868613.1| PREDICTED: coatomer subunit delta [Vollenhovia emeryi]	826.168801783128	1.02500856042292	0.209114030630975	4.90167282094888	9.50240019099725e-07	4.77280925741445e-05
Contig30022	#N/A	26.1335861952908	1.02576817830521	0.304853892315375	3.36478622763997	0.000766029844563584	0.0133733742714529
Contig23109	ref|XP_011157266.1| PREDICTED: thyroid receptor-interacting protein 6 [Solenopsis invicta]	527.031138416554	1.02878003269811	0.213660704909109	4.81501749765241	1.47186992507704e-06	7.04078194071951e-05
Contig116	#N/A	65.6750653938764	1.02896425628169	0.279003044538552	3.68800368463189	0.00022602037832855	0.0049374239024884
Contig136779	ref|XP_012524900.1| PREDICTED: nardilysin isoform X1 [Monomorium pharaonis]	749.686128319868	1.02994996092111	0.235270590528996	4.37772506374603	1.19924496801883e-05	0.000430093731468597
Contig23131	ref|XP_012532102.1| PREDICTED: peptidoglycan-recognition protein LC-like [Monomorium pharaonis]	17.8066610002758	1.03003661823069	0.275827961631431	3.73434445202134	0.000188204766947048	0.00424749563400848
Contig102847	#N/A	42.6001438419234	1.03237967293166	0.259267039848831	3.98191638063056	6.8361832439306e-05	0.00181460590025916
Contig23413	#N/A	68.6756824108985	1.03525330724235	0.270410422297153	3.8284519451869	0.000128951802071558	0.00311390129738822
Contig147555	ref|XP_011700168.1| PREDICTED: peroxidase-like [Wasmannia auropunctata]	297.051581777522	1.0357216054624	0.344848397336849	3.00341139312504	0.00266971276883968	0.0365264757297644
Contig1543	ref|XP_014214738.1| PREDICTED: uncharacterized protein LOC106643922 [Copidosoma floridanum]	1383.80016457539	1.03601527556659	0.264489985496876	3.91703025587269	8.96465012512323e-05	0.00228713897125492
Contig510	#N/A	137.035864947767	1.03613737045427	0.278643413818769	3.7185065896737	0.000200404065395317	0.00447662607882071
Contig13395	ref|XP_011637854.1| PREDICTED: insulin receptor substrate 1 isoform X3 [Pogonomyrmex barbatus]	349.069723706701	1.03656230345528	0.340162245347583	3.04725852922361	0.00230938991284035	0.0326151638877259
Contig48684	ref|XP_011866751.1| PREDICTED: uncharacterized protein LOC105561407 [Vollenhovia emeryi]	44.0220505881186	1.03693255404973	0.27342265600326	3.79241636083501	0.000149188505344682	0.00351397555575214
Contig19724	ref|XP_012533807.1| PREDICTED: protein phosphatase 1 regulatory subunit 16A isoform X5 [Monomorium pharaonis]	14.2138931768847	1.03712607989565	0.321089485544664	3.23002193029264	0.00123780723106057	0.0197552750303392
Contig23191	ref|XP_011876909.1| PREDICTED: dorsal-ventral patterning protein Sog [Vollenhovia emeryi]	81.4486044366233	1.03777727952121	0.324290949871527	3.2001425877976	0.00137359614714754	0.0214483440298523
Contig10234	ref|XP_013190478.1| PREDICTED: retrovirus-related Pol polyprotein from transposon TNT 1-94 [Amyelois transitella]	25.1752229561012	1.03831630251307	0.235282368044657	4.41306465563961	1.01917543106496e-05	0.000375889194746923
Contig2091	ref|XP_011867279.1| PREDICTED: sodium-dependent phosphate transport protein 1, chloroplastic-like [Vollenhovia emeryi]	225.523087798821	1.03845851173033	0.202272771014808	5.13395108259185	2.8372186818305e-07	1.57691218982689e-05
Contig107311	ref|XP_011171823.1| PREDICTED: vesicle-trafficking protein SEC22b [Solenopsis invicta]	973.35452212028	1.03893232322397	0.191963726269559	5.41212834014842	6.2280024424615e-08	3.92291836150475e-06
Contig23704	ref|XP_012054480.1| PREDICTED: ubiquitin-conjugating enzyme E2 J2 [Atta cephalotes]	868.028344298591	1.04054071856924	0.200625077162111	5.18649379872116	2.14290156014918e-07	1.21847988334621e-05
Contig1039	#N/A	155.190601254314	1.041945020078	0.269913188130171	3.86029681356475	0.000113249377670326	0.00278682654752015
Contig10072	#N/A	16.0389449982955	1.04201228989411	0.331225423853534	3.14593088227092	0.00165559125951081	0.0249495891840537
Contig148062	ref|XP_012523269.1| PREDICTED: U3 small nucleolar RNA-associated protein 6 homolog [Monomorium pharaonis]	53.7988496270677	1.04239035719807	0.245072677406584	4.25339278221012	2.10555775752704e-05	0.000673768545845381
Contig23375	ref|XP_012535089.1| PREDICTED: bromodomain adjacent to zinc finger domain protein 2B isoform X9 [Monomorium pharaonis]	627.804690840234	1.04339853294036	0.229016998927306	4.5559872753007	5.21400928977532e-06	0.000214270501764724
Contig90706	#N/A	26.7933618146426	1.04345946013339	0.330715669173424	3.15515579513172	0.00160412421683119	0.0243158593694011
Contig16525	ref|XP_011058320.1| PREDICTED: TBC1 domain family member 22B [Acromyrmex echinatior]	13.2484608706882	1.04361197107448	0.360003808388816	2.89889147491281	0.00374484489629637	0.0478708115701828
Contig107004	#N/A	84.8824273742093	1.04498857198895	0.288004749207595	3.62837270865877	0.000285213314795018	0.00597727066490675
Contig135113	ref|XP_012064353.1| PREDICTED: dnaJ homolog subfamily B member 11 [Atta cephalotes]	71.7793659735378	1.04661336809887	0.239784196815771	4.36481378671921	1.27231094356875e-05	0.000451565496731568
Contig16124	ref|XP_012054902.1| PREDICTED: uncharacterized protein LOC105617976 [Atta cephalotes]	535.681806384955	1.04689868985328	0.333151442209769	3.14241079945288	0.00167562760488271	0.0252039221393705
Contig10279	ref|XP_012543721.1| PREDICTED: neuferricin [Monomorium pharaonis]	136.859120262282	1.04692122607622	0.199386177594683	5.25072118190875	1.51504860538884e-07	8.89830236341283e-06
Contig74341	#N/A	500.13807993366	1.04705825981993	0.191972953768787	5.45419674628235	4.91947104372441e-08	3.15287876239907e-06
Contig14750	ref|XP_001122750.4| PREDICTED: myosin heavy chain 95F [Apis mellifera]	69.0099853554028	1.04793957539512	0.295489817290444	3.54644902827592	0.000390460269710066	0.00772501414283755
Contig110577	ref|XP_011158481.1| PREDICTED: diphthamide biosynthesis protein 7 [Solenopsis invicta]	63.2466529484469	1.04806081402397	0.262022874928528	3.99988288927009	6.33738369200467e-05	0.00170051039178378
Contig119548	ref|XP_011698124.1| PREDICTED: uncharacterized protein LOC105456025 [Wasmannia auropunctata]	20.0328697179156	1.04812694083323	0.282760333160462	3.70676795121201	0.000209921119940759	0.00465243385514725
Contig11525	#N/A	19.9319173692699	1.04886295623294	0.31942604575502	3.28358620147511	0.00102495293976486	0.0169571755487705
Contig3910	ref|XP_011881792.1| PREDICTED: golgin subfamily A member 6-like protein 1 [Vollenhovia emeryi]	24.186947517685	1.04971899441478	0.307741624652145	3.41104000994773	0.00064715594483794	0.0116722178884496
Contig1965	ref|XP_011699829.1| PREDICTED: phosphomannomutase [Wasmannia auropunctata]	62.1257890944291	1.05064990060493	0.257746352151341	4.07629396821887	4.57591630808467e-05	0.00129229136652352
Contig10112	ref|XP_011061261.1| PREDICTED: LOW QUALITY PROTEIN: RNA-binding protein 4.1 [Acromyrmex echinatior]	136.293883260585	1.05110440642949	0.301275189594551	3.48885153086799	0.000485100506423396	0.00923966574130652
Contig99654	ref|XP_012537576.1| PREDICTED: cyclic AMP response element-binding protein A isoform X1 [Monomorium pharaonis]	150.568738674337	1.05136056062211	0.309664161597456	3.39516382909305	0.00068587545597111	0.0122419471026673
Contig27978	ref|XP_011873448.1| PREDICTED: UDP-glucuronosyltransferase 1-7C-like [Vollenhovia emeryi]	165.53262558386	1.05172279459807	0.286850489181005	3.66644936740695	0.000245941588017115	0.00529685213722315
Contig23016	ref|XP_011172326.1| PREDICTED: protein big brother-like [Solenopsis invicta]	175.755000614187	1.05215307503202	0.238972101626	4.40282806182405	1.06848844187806e-05	0.000391309726051448
Contig86450	#N/A	37.2385503918317	1.052690217549	0.248645527755752	4.23369857905938	2.29879010069913e-05	0.00072197341527608
Contig24540	ref|XP_011863868.1| PREDICTED: transport and Golgi organization protein 1-like isoform X3 [Vollenhovia emeryi]	295.845831938709	1.05296345649722	0.332143299884371	3.17020833135512	0.00152329677816483	0.0233028257685796
Contig109132	#N/A	127.438546672448	1.05298268618726	0.347820702021008	3.02737209162341	0.00246690091011556	0.0343794368538085
Contig8544	ref|XP_011861687.1| PREDICTED: thioredoxin-2-like [Vollenhovia emeryi]	422.457783856007	1.05302359405705	0.202515396092228	5.19972117861841	1.99587697418468e-07	1.14061887895946e-05
Contig22734	ref|XP_012539061.1| PREDICTED: serine protease inhibitor 3/4-like isoform X2 [Monomorium pharaonis]	789.862171128673	1.05316434483267	0.216886210623742	4.85583819185128	1.19878564123632e-06	5.87964252985977e-05
Contig31400	ref|XP_011880373.1| PREDICTED: bestrophin-4 isoform X3 [Vollenhovia emeryi]	212.597790424429	1.05331458466558	0.324280955687272	3.24815431246408	0.00116156256716945	0.0187819418128195
Contig89336	ref|XP_011642855.1| PREDICTED: protein phosphatase 1 regulatory subunit 16A isoform X1 [Pogonomyrmex barbatus]	168.559502411439	1.05336427217182	0.181052373533227	5.8180086326154	5.95528270474838e-09	4.38923754740079e-07
Contig87132	ref|XP_012529985.1| PREDICTED: carboxypeptidase D-like [Monomorium pharaonis]	92.2489132402931	1.05364896060994	0.21669033461917	4.86246404327038	1.15933443375686e-06	5.70230657707575e-05
Contig2691	ref|XP_012523963.1| PREDICTED: uncharacterized protein LOC105829548 [Monomorium pharaonis]	254.888785437274	1.05390130102969	0.326292624550369	3.22992682559702	0.00123821904639553	0.0197552750303392
Contig118184	#N/A	18.3882697566335	1.05408042127802	0.351736925745894	2.99678635969976	0.00272841849905689	0.0372207772187004
Contig20288	ref|XP_011691460.1| PREDICTED: lipid storage droplets surface-binding protein 2-like [Wasmannia auropunctata]	2529.71427755465	1.05411292193697	0.26238471139844	4.01743270908902	5.88356285097797e-05	0.00160026773460194
Contig17205	ref|XP_011164426.1| PREDICTED: protein 60A [Solenopsis invicta]	383.31752448131	1.05437986684926	0.2870372081594	3.67332121717033	0.000239418207333661	0.00518003522165716
Contig9068	ref|XP_011637688.1| PREDICTED: cyclin-dependent kinase 1 [Pogonomyrmex barbatus]	48.444928118403	1.05457049573846	0.297860247647696	3.54048754094165	0.000399388491963812	0.00788049919237311
Contig22149	ref|XP_011052385.1| PREDICTED: adenosine monophosphate-protein transferase FICD homolog [Acromyrmex echinatior]	521.488564647818	1.054924810795	0.243778881877492	4.32738390901775	1.50890828581695e-05	0.000516907741904886
Contig40816	ref|XP_003707316.2| PREDICTED: cyclin-K [Megachile rotundata]	41.5765566589693	1.05549960768725	0.308814081097423	3.41791282293979	0.000631033155024192	0.011440814794518
Contig29714	ref|XP_011055985.1| PREDICTED: ER membrane protein complex subunit 8 [Acromyrmex echinatior]	19.9383288540416	1.05587368031472	0.332634119774679	3.17427953882168	0.00150208950866406	0.0230460874112419
Contig150102	ref|XP_011691812.1| PREDICTED: four-domain proteases inhibitor-like [Wasmannia auropunctata]	256.024660733195	1.05588942744693	0.263576179740037	4.00601233574423	6.17524253681212e-05	0.00166490922741002
Contig29309	ref|XP_011861495.1| PREDICTED: protein disulfide-isomerase [Vollenhovia emeryi]	548.97240093613	1.05632057758241	0.218701555380788	4.82996371810533	1.3655793116703e-06	6.60926740802482e-05
Contig6516	ref|XP_012056419.1| PREDICTED: uncharacterized protein LOC105619511 [Atta cephalotes]	36.1803406933991	1.05646379124472	0.262677024639387	4.02191167154825	5.77277069812091e-05	0.00157518817998988
Contig6962	ref|XP_011644812.1| PREDICTED: conserved oligomeric Golgi complex subunit 6 isoform X1 [Pogonomyrmex barbatus]	258.485603061467	1.05704010800245	0.232625183811737	4.54396248369182	5.52064875840808e-06	0.000225098394685133
Contig18487	ref|XP_011877344.1| PREDICTED: protein NDRG3 isoform X7 [Vollenhovia emeryi]	250.018712236684	1.05718171219112	0.307191863626056	3.4414378678923	0.000578631341634211	0.0106559628957607
Contig23972	ref|XP_012233092.1| PREDICTED: LOW QUALITY PROTEIN: golgin subfamily A member 4-like [Linepithema humile]	189.391964297177	1.05741981748699	0.25432744245994	4.15771026224804	3.21453362969564e-05	0.000959742341884007
Contig103989	#N/A	9.1447451383084	1.05778289314208	0.34884858886733	3.03221204527896	0.00242768599875202	0.0339375537609274
Contig70747	#N/A	91.1600840863596	1.05792664538405	0.347673362245027	3.04287518190267	0.00234329507004065	0.0329855001021116
Contig75327	#N/A	13.4897564203086	1.058218550127	0.357299107191368	2.96171618912057	0.00305929636823192	0.0407961149094776
Contig29246	ref|XP_012522882.1| PREDICTED: cytochrome c [Monomorium pharaonis]	512.852215128652	1.0624927320209	0.261472501444732	4.06349702607437	4.83429385556244e-05	0.00135233579109215
Contig102515	ref|XP_014599649.1| PREDICTED: acetyl-coenzyme A transporter 1 [Polistes canadensis]	7.86418326146678	1.06265832708081	0.338687536408362	3.13757730310908	0.00170350347142635	0.0255297734306568
Contig23732	ref|XP_011869257.1| PREDICTED: uncharacterized protein LOC105562793 [Vollenhovia emeryi]	195.017893378964	1.06290747589905	0.356781748433781	2.97915316734966	0.00289046252014817	0.03899579747759
Contig1007	#N/A	182.565463805975	1.06333562768991	0.232852007431031	4.56657273184498	4.95763073805063e-06	0.000205050780386018
Contig86903	ref|XP_011871922.1| PREDICTED: sorting nexin-17 isoform X1 [Vollenhovia emeryi]	20.5704673068213	1.06501307840676	0.353303637923226	3.01444130229475	0.00257453023413126	0.0354891586878915
Contig69615	ref|XP_012532088.1| PREDICTED: DPH3 homolog [Monomorium pharaonis]	68.8261894329872	1.06576900515643	0.250190496841762	4.25983008391601	2.04582367905979e-05	0.000658851418693933
Contig11934	ref|XP_012054941.1| PREDICTED: trehalase [Atta cephalotes]	126.529029506194	1.06613139649933	0.303862899124406	3.50859351230912	0.000450482837006076	0.00868768194791552
Contig111401	ref|XP_011062249.1| PREDICTED: monocarboxylate transporter 9 [Acromyrmex echinatior]	71.8008053979708	1.06667323672701	0.359869663952261	2.9640543329279	0.00303614674435724	0.0405699088175449
Contig43203	ref|XP_012060192.1| PREDICTED: putative sodium-dependent multivitamin transporter [Atta cephalotes]	23.6081706291255	1.06688242955131	0.311577044699602	3.42413681527763	0.000616755619612407	0.0112390078739743
Contig44566	ref|XP_012062448.1| PREDICTED: transmembrane protease serine 9-like [Atta cephalotes]	817.53854327535	1.06690001797558	0.322674828037908	3.30642468909984	0.000944947481478345	0.0158618774295339
Contig123422	#N/A	91.3064513961313	1.06717429068342	0.261281759106814	4.08438114597641	4.4194439635771e-05	0.00125384617923963
Contig70646	ref|XP_012541748.1| PREDICTED: serine protease snake-like isoform X4 [Monomorium pharaonis]	67.3732502929239	1.06809109515467	0.357507247549599	2.98760683168106	0.00281171007420595	0.0381383526708707
Contig8337	#N/A	48.4130229570525	1.06810101700768	0.305327618928796	3.49821290571415	0.000468387064110249	0.00897172928139086
Contig3470	ref|XP_011063345.1| PREDICTED: protein RUFY3 isoform X4 [Acromyrmex echinatior]	45.5851556569291	1.06814340200824	0.242355589147847	4.40733966880634	1.04648010794697e-05	0.00038439153130856
Contig691	#N/A	1971.54921830574	1.06864775894256	0.339165229910879	3.15081755055896	0.00162814160916195	0.0246125065416218
Contig130454	#N/A	75.4492424010857	1.06949951663757	0.245011172831351	4.3651050859372	1.27061660161736e-05	0.000451082198460043
Contig35680	ref|XP_012057083.1| PREDICTED: uncharacterized protein LOC105620188 [Atta cephalotes]	102.797970276886	1.06959396878802	0.25974326292952	4.11788916765187	3.82358493627433e-05	0.0011086843009363
Contig113497	ref|XP_011165102.1| PREDICTED: bifunctional glutamate/proline--tRNA ligase [Solenopsis invicta]	61.9185641620241	1.06966893646183	0.206623347330735	5.17690256343417	2.25599959971226e-07	1.27636683235452e-05
Contig1021	#N/A	338.576097694375	1.06988979533825	0.217569123224575	4.91747073059584	8.76695599948669e-07	4.43296782592986e-05
Contig6737	ref|XP_012059861.1| PREDICTED: ribosomal protein S6 kinase beta-1-like [Atta cephalotes]	705.752935113771	1.07027435153452	0.269980033340796	3.96427224002715	7.36201980458531e-05	0.00193449516329981
Contig19106	ref|XP_012526367.1| PREDICTED: uncharacterized protein LOC105831061 [Monomorium pharaonis]	31.5981558276412	1.07131242125099	0.369556589531788	2.89891305309504	0.00374458718769866	0.0478708115701828
Contig4657	ref|XP_011870601.1| PREDICTED: uncharacterized protein LOC105563547 [Vollenhovia emeryi]	23.8710039780433	1.07165079803632	0.34878657734308	3.07251158057669	0.00212265596903776	0.0304293727891212
Contig47274	ref|XP_011175130.1| PREDICTED: cysteine dioxygenase type 1 [Solenopsis invicta]	21.493953272485	1.072072659834	0.370196195748631	2.8959580680347	0.00378002905446059	0.0482470456650935
Contig72683	#N/A	10.6438754142546	1.07278895599143	0.332792539495822	3.22359677178068	0.00126591517177375	0.0201020490643122
Contig121655	#N/A	35.8081267780226	1.07398687978476	0.186341432509398	5.76354311181221	8.2366200865184e-09	5.94186691235054e-07
Contig143820	ref|XP_011165964.1| PREDICTED: 1-acylglycerol-3-phosphate O-acyltransferase ABHD5-like isoform X1 [Solenopsis invicta]	223.222229537205	1.07465721291359	0.303783990833671	3.53757026485964	0.000403826721560957	0.00794956554184462
Contig57524	#N/A	7.68628273031937	1.07497286841565	0.360649880004423	2.98065500091797	0.00287632634348915	0.0388361330890021
Contig5339	#N/A	1198.10406941086	1.07517142689387	0.233410514324021	4.60635387402177	4.09790790229241e-06	0.000174539473072074
Contig2985	ref|XP_011867333.1| PREDICTED: proclotting enzyme-like [Vollenhovia emeryi]	904.135986989303	1.0754169252598	0.313360376512818	3.43188547712192	0.000599400617397526	0.0109758459799822
Contig12841	ref|XP_012232148.1| PREDICTED: uncharacterized protein LOC105677851 isoform X1 [Linepithema humile]	17.5181999201055	1.075542009528	0.296780952042448	3.62402641451924	0.000290051963162468	0.0060579502192638
Contig126661	ref|XP_011873404.1| PREDICTED: glutaminyl-peptide cyclotransferase isoform X2 [Vollenhovia emeryi]	688.882677832192	1.07576645450281	0.27334022411023	3.93563171320509	8.29781397147707e-05	0.00214016687700245
Contig11360	ref|XP_012062036.1| PREDICTED: ABC transporter G family member 23-like, partial [Atta cephalotes]	64.028683012796	1.07654371354252	0.336217465076068	3.2019268044239	0.00136511680352278	0.0213552342506017
Contig23412	ref|XP_011172284.1| PREDICTED: protein FAM161A isoform X1 [Solenopsis invicta]	40.3252042114401	1.07855850437498	0.299336530705264	3.60316364271946	0.000314367472575002	0.00645557698755093
Contig84138	ref|XP_011159788.1| PREDICTED: uncharacterized protein LOC105195868 isoform X1 [Solenopsis invicta]	104.143533065562	1.07920942188283	0.268220948123374	4.02358365158871	5.73192117760662e-05	0.00156467141421084
Contig58988	ref|XP_012535964.1| PREDICTED: aquaporin AQPAn.G isoform X1 [Monomorium pharaonis]	99.180437895416	1.07969144324106	0.299003146960283	3.61097016609151	0.000305053755086284	0.00630729683522966
Contig97171	ref|XP_011629794.1| PREDICTED: protein unzipped [Pogonomyrmex barbatus]	44.8662345290203	1.08018680361346	0.239273411101158	4.51444562370029	6.34826072246645e-06	0.000254031581474348
Contig41652	ref|XP_011867279.1| PREDICTED: sodium-dependent phosphate transport protein 1, chloroplastic-like [Vollenhovia emeryi]	122.646223072266	1.08135859942144	0.234227854891322	4.61669514039298	3.89899387620509e-06	0.00016711698973694
Contig30646	ref|XP_011879335.1| PREDICTED: uncharacterized protein LOC105568344 [Vollenhovia emeryi]	309.426197437554	1.08142892356525	0.242756478934736	4.45478912987523	8.39756906623132e-06	0.000320255323776123
Contig135052	ref|XP_011643111.1| PREDICTED: alaserpin-like isoform X5 [Pogonomyrmex barbatus]	48.3726989677412	1.08225798814596	0.282913749575196	3.8253990474871	0.000130560429124799	0.00314426610892751
Contig16644	#N/A	14.333432299151	1.08227785617892	0.371190075773603	2.91569717731093	0.00354894775529027	0.0459349839605882
Contig14979	ref|XP_011866424.1| PREDICTED: uncharacterized protein LOC105561237 isoform X2 [Vollenhovia emeryi]	81.2252149936994	1.08331234371961	0.295503023164443	3.66599411443843	0.000246379591274011	0.00530105059353225
Contig105188	ref|XP_011685463.1| PREDICTED: histone acetyltransferase KAT8 [Wasmannia auropunctata]	80.1012382158004	1.08333724396678	0.288372672587357	3.75672644098618	0.00017215050203048	0.00394450731364586
Contig40101	#N/A	144.300506533459	1.08357106924772	0.290317054785944	3.73237138977816	0.000189685551597069	0.00427380235824637
Contig141360	ref|XP_011874894.1| PREDICTED: tubulin-specific chaperone cofactor E-like protein isoform X1 [Vollenhovia emeryi]	814.153028090805	1.08496515668504	0.300454189592229	3.61108346719189	0.000304920501299986	0.00630550302886495
Contig66222	ref|XP_011173700.1| PREDICTED: uncharacterized protein LOC105205865 [Solenopsis invicta]	1708.36919038798	1.08629111777507	0.280976904641243	3.86612244576496	0.000110579435479275	0.00272954487861055
Contig49374	ref|XP_012348594.1| PREDICTED: protein NDRG3 isoform X4 [Apis florea]	87.3269803120284	1.08669215715174	0.268984151126396	4.03998582296065	5.34544325184219e-05	0.00147370795111878
Contig72	#N/A	25.0291434081057	1.08691469488712	0.232713202067887	4.67061896458306	3.00293510927534e-06	0.000132911240832006
Contig43221	ref|XP_012530004.1| PREDICTED: mesencephalic astrocyte-derived neurotrophic factor homolog [Monomorium pharaonis]	685.931445064074	1.08724881629053	0.23057743468973	4.71533052552846	2.41318684795007e-06	0.000109685712815085
Contig106710	#N/A	47.6658994569501	1.08845118767759	0.227620151366047	4.78187533548908	1.73667373449018e-06	8.18905673953933e-05
Contig3832	ref|XP_011632072.1| PREDICTED: uncharacterized protein LOC105423848 [Pogonomyrmex barbatus]	183.862914802206	1.08908503946984	0.358302375726302	3.03956968541499	0.00236916386518221	0.0332910359975982
Contig838	#N/A	533.820067081886	1.08967937954279	0.250794433635067	4.34491054585523	1.39332430258938e-05	0.000486243648922687
Contig2855	ref|XP_011707648.1| PREDICTED: translocation protein SEC63 homolog [Wasmannia auropunctata]	106.800086489164	1.09092019742798	0.213480380392209	5.11016607438929	3.21875746062857e-07	1.77442509864098e-05
Contig43319	ref|XP_011644521.1| PREDICTED: lambda-crystallin homolog isoform X2 [Pogonomyrmex barbatus]	123.380361810792	1.09478118297187	0.311359591642984	3.51613122690367	0.000437884496636696	0.00848378395101848
Contig622	#N/A	1105.8422537737	1.09492303849104	0.232546540918281	4.70840389268918	2.49664030736815e-06	0.000112972765646788
Contig37053	ref|XP_011168672.1| PREDICTED: protein sel-1 homolog 1 [Solenopsis invicta]	217.144039878605	1.09505145586411	0.164086339187472	6.67362963478024	2.49552940131557e-11	2.75593423640073e-09
Contig8340	#N/A	218.086872747518	1.09509101621545	0.290969159304897	3.76359824124158	0.000167485886198787	0.0038634854517711
Contig28401	ref|NP_001292916.1| fucosyltransferase 8 (alpha (1,6) fucosyltransferase) [Atta cephalotes]	474.225573242686	1.09595475826328	0.361772251072641	3.02940525431073	0.00245035748231553	0.0341945646847848
Contig108339	ref|XP_011700054.1| PREDICTED: solute carrier family 35 member E1 homolog isoform X2 [Wasmannia auropunctata]	49.5196722593425	1.09610341826516	0.275797311738552	3.97430783989743	7.05842222363259e-05	0.00186577636131461
Contig26983	ref|XP_011695348.1| PREDICTED: HEAT repeat-containing protein 1 [Wasmannia auropunctata]	822.404610766645	1.09613375130091	0.325166643962371	3.37099075705857	0.000748983706965293	0.0131366627569052
Contig131258	ref|XP_011871788.1| PREDICTED: nucleoside diphosphate kinase 6-like isoform X1 [Vollenhovia emeryi]	17.2547648609972	1.0967023980669	0.346694376639837	3.16331175802775	0.00155985192151276	0.0237682874701159
Contig34907	ref|XP_011879004.1| PREDICTED: 227 kDa spindle- and centromere-associated protein isoform X1 [Vollenhovia emeryi]	1159.86207643854	1.09706283536238	0.273734735752657	4.00775894351117	6.12976378383624e-05	0.00165593981231308
Contig30324	ref|XP_011861687.1| PREDICTED: thioredoxin-2-like [Vollenhovia emeryi]	717.784794536836	1.09748619042	0.19718459347294	5.56578062763615	2.60981404237888e-08	1.76963660771585e-06
Contig69548	ref|XP_011053190.1| PREDICTED: uncharacterized protein LOC105145389, partial [Acromyrmex echinatior]	1408.7016795011	1.09776836883473	0.364591028259358	3.01095826212655	0.00260424646955996	0.0358259566568172
Contig4349	ref|XP_011694785.1| PREDICTED: RNA exonuclease 4 isoform X1 [Wasmannia auropunctata]	227.050822152536	1.0998683949661	0.270898951497055	4.06006885182816	4.90582473306028e-05	0.00136780122399103
Contig9565	ref|XP_011055823.1| PREDICTED: leucine-rich repeat-containing protein let-4 [Acromyrmex echinatior]	276.956979030219	1.1008597444282	0.222350499240666	4.95101089580492	7.38289695261873e-07	3.78830089540127e-05
Contig12739	#N/A	545.564544507367	1.10144439466487	0.236204906246393	4.6630885537827	3.11498630742054e-06	0.000137511638377125
Contig114025	ref|XP_012539065.1| PREDICTED: serine protease inhibitor 3/4-like isoform X5 [Monomorium pharaonis]	141.906597831612	1.10160325930987	0.31155358881968	3.53583877330155	0.000406482689460858	0.00798562124417568
Contig15177	ref|XP_011868202.1| PREDICTED: uncharacterized protein LOC105562185 [Vollenhovia emeryi]	14.0926337378076	1.10291416454777	0.359807780084337	3.06528714940308	0.00217461102712864	0.031034878882652
Contig31919	ref|XP_011702759.1| PREDICTED: spindle pole body component 110 isoform X1 [Wasmannia auropunctata]	49.429335785782	1.10342766392161	0.316168924348636	3.48999404731146	0.000483031306401131	0.00920542546181605
Contig135677	ref|XP_016841989.1| PREDICTED: uncharacterized protein DDB_G0288805-like isoform X3 [Nasonia vitripennis]	26.7529758734261	1.10379234453438	0.321669270804011	3.43145101108182	0.000600361553893295	0.0109914221833077
Contig17000	ref|XP_011058559.1| PREDICTED: protein prenyltransferase alpha subunit repeat-containing protein 1 isoform X2 [Acromyrmex echinatior]	132.094592328752	1.10382143292247	0.275513890652352	4.00640936944735	6.16487647268495e-05	0.00166310634168828
Contig134871	ref|XP_011692802.1| PREDICTED: serine protease nudel-like isoform X2 [Wasmannia auropunctata]	264.221190088945	1.10535353172898	0.297862292663115	3.71095489075264	0.000206478899395002	0.00459129019392524
Contig1425	#N/A	56.9289078198708	1.10582630590049	0.279698657514698	3.95363465712157	7.69729121297257e-05	0.002011947789453
Contig112676	ref|XP_012063715.1| PREDICTED: protein sel-1 homolog 1 [Atta cephalotes]	303.531318044839	1.10668679134459	0.171879571244061	6.43873372114214	1.20474339401479e-10	1.18049183985493e-08
Contig18549	ref|XP_011063866.1| PREDICTED: LOW QUALITY PROTEIN: repetin-like [Acromyrmex echinatior]	2831.59377541514	1.10916433256299	0.321893136717605	3.44575328282334	0.000569470018743856	0.0105108703338543
Contig1134	#N/A	32.8178277984471	1.10925400434504	0.349240335220183	3.17619098505818	0.00149222674941635	0.0229103179435468
Contig108303	ref|XP_011067388.1| PREDICTED: LOW QUALITY PROTEIN: histidine--tRNA ligase, cytoplasmic [Acromyrmex echinatior]	31.7202331093459	1.10981042417859	0.226468516613879	4.90050644024299	9.55899240195915e-07	4.79590527413721e-05
Contig34473	#N/A	257.46778649205	1.10991515784465	0.307793541877523	3.60603783651284	0.000310907823973411	0.00640166449615302
Contig106712	ref|XP_012061821.1| PREDICTED: protein MEF2BNB homolog [Atta cephalotes]	36.4227383334925	1.11028763345995	0.313140861131205	3.54564916711634	0.000391647252974325	0.00774014144052174
Contig14856	#N/A	107.710226166036	1.11040342432502	0.319468949918524	3.47577886554613	0.000509372108197149	0.00962088984415713
Contig118846	#N/A	32.8954930627558	1.11191083380295	0.307743600884978	3.61310789438164	0.000302548734479544	0.00626409833247463
Contig3153	ref|XP_016914557.1| PREDICTED: actin-5C [Apis cerana]	1518.22642808536	1.11341887249152	0.178481460127888	6.23828868104128	4.42383710066461e-10	3.90074281254571e-08
Contig45556	#N/A	58.5581548442934	1.11344340062813	0.220066080032478	5.05958664989993	4.20166310129147e-07	2.26697286905803e-05
Contig23173	ref|XP_011877380.1| PREDICTED: protein numb isoform X2 [Vollenhovia emeryi]	268.550055788655	1.11514562146818	0.233179944484539	4.78233933854514	1.73266858874896e-06	8.1758565760126e-05
Contig64075	ref|XP_011638439.1| PREDICTED: protein fem-1 homolog CG6966 isoform X1 [Pogonomyrmex barbatus]	22.4361764842344	1.11520934193866	0.382598589344238	2.91482868206623	0.00355883842657857	0.0460040333983439
Contig44751	ref|XP_011867333.1| PREDICTED: proclotting enzyme-like [Vollenhovia emeryi]	62.6444248215737	1.11656490749561	0.368385282425784	3.03097045610272	0.00243769098756213	0.0340493383033526
Contig30641	#N/A	18.6005460723121	1.11754172757907	0.376410546366828	2.96894371947268	0.00298825322000309	0.0400440313330629
Contig6922	ref|XP_012062170.1| PREDICTED: transmembrane protease serine 11D-like [Atta cephalotes]	350.615612913298	1.11870098859377	0.310399043881223	3.60407356480728	0.000313268325471912	0.00643592950924827
Contig134029	ref|XP_012538749.1| PREDICTED: E3 ubiquitin-protein ligase HECW2 isoform X1 [Monomorium pharaonis]	50.762318272547	1.11914969099459	0.349103878040146	3.20577845562027	0.00134697650766552	0.0211386507795287
Contig42801	#N/A	163.827382023592	1.11995600266801	0.288578478169691	3.88094084413822	0.000104053150330413	0.00259442249106613
Contig32615	#N/A	14.9322776866554	1.12077404509356	0.349243381433162	3.209148990868	0.00133128486723691	0.0209468460361371
Contig115437	ref|XP_012235095.1| PREDICTED: uncharacterized protein LOC105679582 isoform X2 [Linepithema humile]	7.4816748602125	1.12217076942465	0.359176558092003	3.12428732928949	0.00178236314786306	0.0264804333845641
Contig22930	ref|XP_011862008.1| PREDICTED: uncharacterized protein LOC105558746 [Vollenhovia emeryi]	9.02600417049589	1.12267758383606	0.381541451817541	2.94247867037246	0.00325596214860661	0.0428568427468832
Contig119289	#N/A	62.0544777021958	1.12434220971054	0.205559622562144	5.46966469239664	4.50887777750545e-08	2.90483112075356e-06
Contig17524	ref|XP_014485395.1| PREDICTED: uncharacterized protein LOC106749935 [Dinoponera quadriceps]	16.9173525899265	1.12492880311157	0.321180799827788	3.5024783664364	0.000460951214316762	0.00884929756205456
Contig16488	#N/A	373.643174473053	1.12550357257443	0.291502548119115	3.86104196974127	0.000112904505440006	0.00278035801720375
Contig2982	ref|XP_011165016.1| PREDICTED: serpin B3-like isoform X3 [Solenopsis invicta]	1392.4844099232	1.12617101860843	0.266776604505192	4.22140097591095	2.4278860915318e-05	0.000755172808295858
Contig20222	ref|XP_011049410.1| PREDICTED: protein lethal(2)denticleless [Acromyrmex echinatior]	114.02143830902	1.12665645978474	0.275300283590347	4.09246385470938	4.26813790326346e-05	0.00121575142535848
Contig93601	ref|XP_016908073.1| PREDICTED: peroxisome proliferator-activated receptor gamma coactivator 1-alpha, partial [Apis cerana]	230.429325264882	1.1266966467923	0.255432952807765	4.41092910843121	1.02928014756694e-05	0.000378997550725341
Contig110946	ref|XP_011057447.1| PREDICTED: LOW QUALITY PROTEIN: serine protease gd-like, partial [Acromyrmex echinatior]	220.345965143269	1.12774445835624	0.309948952826828	3.63848449259424	0.000274247138191792	0.00579671935765924
Contig5302	ref|XP_011701276.1| PREDICTED: histone deacetylase 4 isoform X9 [Wasmannia auropunctata]	28.4330378670745	1.12774824513392	0.350734855263069	3.21538686050478	0.0013026883441207	0.0205852688300612
Contig7569	ref|XP_011064109.1| PREDICTED: serine protease snake-like [Acromyrmex echinatior]	879.882485634565	1.12794718520478	0.311164269093741	3.62492515123893	0.000289045153241707	0.00603891070893866
Contig19514	ref|XP_011874428.1| PREDICTED: ninjurin-1 [Vollenhovia emeryi]	75.5529214500085	1.12863116399728	0.262708133456021	4.29614092700415	1.73797118733582e-05	0.00057584467285453
Contig134488	ref|XP_011867353.1| PREDICTED: protein FAM8A1 [Vollenhovia emeryi]	220.209512056478	1.12992876421707	0.207258816424009	5.45177659369367	4.98690813510933e-08	3.19157413796468e-06
Contig96458	ref|XP_011165180.1| PREDICTED: baculoviral IAP repeat-containing protein 3-like [Solenopsis invicta]	25.5814782215718	1.13022918065949	0.273659633861637	4.1300544209269	3.62677372873405e-05	0.0010602312835709
Contig26398	ref|XP_011863125.1| PREDICTED: conserved oligomeric Golgi complex subunit 6 isoform X1 [Vollenhovia emeryi]	43.8419527109749	1.13070619693696	0.275957305857324	4.09739540478615	4.17824858552396e-05	0.00119315435602705
Contig120989	ref|XP_011632630.1| PREDICTED: uncharacterized protein LOC105424207 isoform X1 [Pogonomyrmex barbatus]	46.36516000797	1.13156795695058	0.348612939992183	3.24591495937001	0.00117073805886957	0.0188920122698165
Contig13516	ref|XP_011054452.1| PREDICTED: RCC1 and BTB domain-containing protein 1-like [Acromyrmex echinatior]	31.2095451429997	1.1333403288966	0.389823156523157	2.90731915211217	0.00364541062138544	0.0468862591055164
Contig68243	ref|XP_011872589.1| PREDICTED: peroxidase-like isoform X3 [Vollenhovia emeryi]	1601.21240676685	1.13337876420241	0.34568243084868	3.27867043002408	0.00104297363705443	0.0172025311425172
Contig9707	ref|XP_012529751.1| PREDICTED: uncharacterized protein C45G9.7 [Monomorium pharaonis]	162.310241136774	1.13429100560398	0.241467759906541	4.69748427716812	2.6338545265714e-06	0.000118548804436261
Contig135826	ref|XP_011700018.1| PREDICTED: cysteine--tRNA ligase, cytoplasmic [Wasmannia auropunctata]	12.6931409511714	1.13541056681178	0.330102523481431	3.43956948537427	0.000582640197262433	0.0107166916738841
Contig652	#N/A	54.4831913727132	1.13573629999115	0.23946933734163	4.74272118760197	2.10866394300557e-06	9.72998815810674e-05
Contig63183	ref|XP_011861621.1| PREDICTED: filaggrin-2-like [Vollenhovia emeryi]	478.421968708151	1.13575677552087	0.32246918136482	3.5220630099096	0.000428202354274636	0.00833145395589677
Contig24461	ref|XP_011863302.1| PREDICTED: CD109 antigen-like isoform X2 [Vollenhovia emeryi]	3618.62865197101	1.13599711793982	0.263853852095609	4.30540281643559	1.66682153964447e-05	0.00055552798298684
Contig7854	ref|XP_011707317.1| PREDICTED: putative ATP-dependent RNA helicase Pl10 isoform X1 [Wasmannia auropunctata]	348.581873310229	1.13602739164564	0.265297573685934	4.2820873778156	1.85148245834782e-05	0.000606197349363546
Contig54311	#N/A	84.6835362374827	1.13606271241763	0.221391987836725	5.13145359738794	2.87513109326233e-07	1.5948610442014e-05
Contig16613	ref|XP_011704007.1| PREDICTED: ferritin heavy polypeptide-like 17 isoform X2 [Wasmannia auropunctata]	18.1397453864422	1.13701772250719	0.365783196554312	3.10844711626429	0.00188073301247808	0.0275703952820454
Contig132020	ref|XP_011158225.1| PREDICTED: protein toll [Solenopsis invicta]	60.8542371693584	1.13729940049663	0.324305563871708	3.50687600582314	0.000453400366712471	0.00872660472377001
Contig3272	ref|XP_011861692.1| PREDICTED: DNA-directed RNA polymerase I subunit RPA1 [Vollenhovia emeryi]	61.1965617039126	1.13745863098642	0.393747925243442	2.88879904645381	0.00386716122065913	0.0491570136924327
Contig126564	ref|XP_012526469.1| PREDICTED: ataxin-2 homolog isoform X2 [Monomorium pharaonis]	38.1307496556562	1.13876458616963	0.301447868587191	3.77765015061054	0.000158315058536153	0.00369022659819901
Contig59010	#N/A	17.853336980399	1.13982408159168	0.340694850953419	3.34558646366958	0.00082108754559261	0.0141631857552781
Contig71491	#N/A	48.9681522412983	1.14066652458797	0.338594169643784	3.36883096890888	0.000754877067976583	0.0132184513962532
Contig127051	#N/A	402.816523241009	1.14073840408392	0.315506594974492	3.6155770505404	0.000299679320866607	0.00621607699908291
Contig63186	ref|XP_012537375.1| PREDICTED: uncharacterized protein LOC105837292 isoform X2 [Monomorium pharaonis]	753.008629415403	1.14182445542808	0.330440373421486	3.45546291333973	0.000549348760586631	0.0102123896940638
Contig7419	ref|XP_011641624.1| PREDICTED: mitoferrin-1 isoform X1 [Pogonomyrmex barbatus]	630.33167558708	1.14248586626153	0.251287581313374	4.54652737031508	5.45382804275235e-06	0.000222910016934845
Contig15036	#N/A	8.663113301298	1.14283956759542	0.336740326907832	3.39383042740891	0.000689223554774169	0.0122806941475685
Contig105113	#N/A	16.2485980525039	1.14332360685485	0.323702243955839	3.53202249351979	0.000412394275177009	0.00807718619784155
Contig73598	#N/A	143.899690139226	1.14566462556324	0.325304032414027	3.52182731047462	0.000428583229759296	0.00833527694257523
Contig5724	ref|XP_011869257.1| PREDICTED: uncharacterized protein LOC105562793 [Vollenhovia emeryi]	674.193957046575	1.14575209097988	0.337572281446014	3.39409410651839	0.000688560268361763	0.0122785551917965
Contig108600	#N/A	48.7763134425808	1.14578988993892	0.380817523736783	3.00876356396581	0.00262313167266113	0.0359981156300614
Contig6866	ref|XP_012541782.1| PREDICTED: syntenin-1-like [Monomorium pharaonis]	1093.33257787221	1.14615691655294	0.210539641725406	5.4439007645306	5.2126266795208e-08	3.32974637077971e-06
Contig112176	ref|XP_011871812.1| PREDICTED: ATP-dependent RNA helicase DDX18-like isoform X3 [Vollenhovia emeryi]	37.2970082738715	1.14652855492914	0.318337904524762	3.60160866372719	0.00031625418181808	0.00648940756741975
Contig110910	#N/A	36.1571442837892	1.14760429046998	0.356895527444563	3.21551883456494	0.00130208950030939	0.020578203647006
Contig130977	#N/A	164.524971461995	1.1484142498173	0.186946234492718	6.14301888954088	8.09676502021256e-10	6.79056704669824e-08
Contig112786	#N/A	15.0907450968545	1.14941506488748	0.364329109867147	3.1548812152469	0.00160563462515812	0.0243319403348076
Contig25199	ref|XP_011879730.1| PREDICTED: uncharacterized protein LOC105568563 isoform X2 [Vollenhovia emeryi]	11.7830855045718	1.14980221932273	0.357900705987529	3.21262908982023	0.00131526026569763	0.02074043089213
Contig31325	ref|XP_011161098.1| PREDICTED: elongation of very long chain fatty acids protein AAEL008004 [Solenopsis invicta]	643.814009535716	1.15065712131363	0.293391648804666	3.9219150442817	8.78479684029847e-05	0.00224951178002311
Contig22344	ref|XP_012531758.1| PREDICTED: manganese-transporting ATPase 13A1 [Monomorium pharaonis]	176.615735179504	1.15087991232531	0.303434670132625	3.7928424982626	0.000148932625768851	0.00351014061713886
Contig6130	ref|XP_011861621.1| PREDICTED: filaggrin-2-like [Vollenhovia emeryi]	11581.9551751587	1.15150830825365	0.337036814015004	3.41656537318915	0.000634164356972041	0.0114867857761996
Contig3481	ref|XP_011686511.1| PREDICTED: 1-acylglycerol-3-phosphate O-acyltransferase ABHD5 isoform X1 [Wasmannia auropunctata]	1753.61101867846	1.15161777357076	0.30746290554203	3.74555028529559	0.000179998786706388	0.00409226411741828
Contig31787	ref|XP_014473538.1| PREDICTED: ras-related protein Rab-14 [Dinoponera quadriceps]	98.872614537672	1.15355352589019	0.304013750844979	3.79441233392894	0.000147993558573597	0.00349286433212665
Contig44535	ref|XP_011865243.1| PREDICTED: cytochrome b-c1 complex subunit Rieske, mitochondrial-like, partial [Vollenhovia emeryi]	17.5796835990528	1.15392377466515	0.322005170517277	3.58355666404814	0.000338947191963278	0.00687804645980966
Contig108381	ref|XP_011872035.1| PREDICTED: sorting nexin-27 isoform X2 [Vollenhovia emeryi]	15.9623527156252	1.15448449762456	0.309208048753989	3.73368190859444	0.000188700790322457	0.00425585713932974
Contig4230	ref|XP_012057751.1| PREDICTED: N-acetylserotonin O-methyltransferase-like protein [Atta cephalotes]	1495.3225666351	1.15569194897317	0.233425668057259	4.95100628217834	7.38307200329285e-07	3.78830089540127e-05
Contig7194	ref|XP_011692830.1| PREDICTED: uncharacterized protein LOC105452961 [Wasmannia auropunctata]	392.065610505338	1.15595274060364	0.370038347631216	3.12387283102796	0.00178487580123949	0.0265061483693925
Contig68440	ref|XP_015592753.1| PREDICTED: serine protease gd-like [Cephus cinctus]	140.573693105101	1.15686542008118	0.31254839985842	3.70139607371282	0.000214416476184343	0.00473118711377538
Contig46476	ref|XP_011876570.1| PREDICTED: DNA ligase 1-like [Vollenhovia emeryi]	815.621600752324	1.15868404009959	0.203005540462232	5.7076473748516	1.14548426202016e-08	8.12892217214034e-07
Contig19459	ref|XP_011157722.1| PREDICTED: eukaryotic translation initiation factor 5A isoform X2 [Solenopsis invicta]	31.0314523229999	1.15942194386406	0.268739395006317	4.31429840733551	1.60110559010008e-05	0.000539593274095011
Contig50835	ref|XP_011869257.1| PREDICTED: uncharacterized protein LOC105562793 [Vollenhovia emeryi]	14.2678559612167	1.15944919538577	0.38743458698364	2.99263213543381	0.00276582908194301	0.0376025208138967
Contig11685	ref|XP_011159247.1| PREDICTED: glutamine--fructose-6-phosphate aminotransferase [isomerizing] 1-like, partial [Solenopsis invicta]	338.382275064138	1.16038364083442	0.237294752778465	4.89005183320568	1.00809428770262e-06	5.03356770001852e-05
Contig7890	ref|XP_011166506.1| PREDICTED: negative elongation factor E [Solenopsis invicta]	94.0795711778479	1.16051370831149	0.288160717732811	4.02731405391468	5.64176533249817e-05	0.00154503708360543
Contig16131	ref|XP_011880989.1| PREDICTED: E3 ubiquitin-protein ligase MYCBP2 isoform X1 [Vollenhovia emeryi]	385.664555727955	1.16072115779504	0.224949743380256	5.15991323374374	2.47064317977196e-07	1.38653372734464e-05
Contig119185	ref|XP_011876570.1| PREDICTED: DNA ligase 1-like [Vollenhovia emeryi]	281.838268930676	1.16075044823072	0.20451141033982	5.67572462730563	1.38102788151448e-08	9.7443660314102e-07
Contig1179	#N/A	149.639770293115	1.16101684088101	0.272016111567637	4.26819144715376	1.9706416867213e-05	0.000638887405457859
Contig14642	ref|XP_011638533.1| PREDICTED: LOW QUALITY PROTEIN: eukaryotic translation initiation factor 4 gamma 3-like [Pogonomyrmex barbatus]	7.75348143217984	1.16157541672352	0.373681175398383	3.10846650352444	0.00188060962517496	0.0275703952820454
Contig127698	ref|XP_012543141.1| PREDICTED: protein VAC14 homolog [Monomorium pharaonis]	38.9114977695038	1.16313569654508	0.3925542164101	2.9629937672863	0.00304662737951009	0.0406618763354868
Contig44875	#N/A	9.91056977959151	1.16442789452948	0.395433453333811	2.9446873670208	0.00323281138928682	0.0426410651888952
Contig143109	ref|XP_011643118.1| PREDICTED: alaserpin-like isoform X11 [Pogonomyrmex barbatus]	151.74245587955	1.16506309362128	0.291405010648948	3.99808874606076	6.38560109073418e-05	0.00171175510242899
Contig138049	ref|XP_014357417.1| PREDICTED: endophilin-A isoform X6 [Papilio machaon]	12.4310809907562	1.16546477499199	0.39176179592591	2.97493218356699	0.00293053326215925	0.0394267200212763
Contig6131	ref|XP_011861621.1| PREDICTED: filaggrin-2-like [Vollenhovia emeryi]	9531.89187107792	1.16570646316873	0.339774552978597	3.43082332961573	0.000601752369721197	0.0110085047709929
Contig1910	ref|XP_011882869.1| PREDICTED: bifunctional glutamate/proline--tRNA ligase [Vollenhovia emeryi]	1726.02969636636	1.16604729249993	0.225495115898755	5.17105342992648	2.32777992449721e-07	1.31478361799569e-05
Contig36404	ref|XP_011636770.1| PREDICTED: 1-acyl-sn-glycerol-3-phosphate acyltransferase alpha isoform X1 [Pogonomyrmex barbatus]	177.298673206853	1.16724361311951	0.37571761566103	3.10670451548003	0.00189185395447136	0.0277154458444073
Contig78443	ref|XP_012214938.1| PREDICTED: 40S ribosomal protein S3a [Linepithema humile]	1276.35114261296	1.16732721087846	0.276016486448884	4.22919379163475	2.34530258238865e-05	0.000733016511657189
Contig142378	ref|XP_011878783.1| PREDICTED: E3 ubiquitin-protein ligase RNF19A-like [Vollenhovia emeryi]	73.3381138965551	1.16737227026391	0.379939736147958	3.07251955823148	0.00212259923170354	0.0304293727891212
Contig117205	ref|XP_012522958.1| PREDICTED: myosin-IA [Monomorium pharaonis]	592.777025980547	1.16826443035282	0.27763166523212	4.20796536078138	2.57680354021485e-05	0.000791328431391977
Contig136218	ref|XP_011638439.1| PREDICTED: protein fem-1 homolog CG6966 isoform X1 [Pogonomyrmex barbatus]	30.3205903476664	1.16859193772104	0.351788448845215	3.32185988925183	0.00089419583311424	0.0151847575396888
Contig7133	ref|XP_011159622.1| PREDICTED: tryptophan--tRNA ligase, cytoplasmic [Solenopsis invicta]	229.446203238704	1.16961929980126	0.221075898647175	5.29057806372604	1.21930364844255e-07	7.31981606816681e-06
Contig967	#N/A	15.1300282423603	1.16996714007633	0.332378069667059	3.5199889729436	0.000431564740426634	0.00838124312018008
Contig6203	ref|XP_011704110.1| PREDICTED: 6-phosphofructo-2-kinase/fructose-2,6-bisphosphatase-like [Wasmannia auropunctata]	4872.24039033445	1.17108021636115	0.280752687536635	4.17121640628405	3.0297795598868e-05	0.000910437680555038
Contig69060	ref|XP_012532668.1| PREDICTED: uncharacterized protein LOC105834596 [Monomorium pharaonis]	512.152892292557	1.17204733188231	0.385997983930791	3.03640791059795	0.00239415229490471	0.0335795396960603
Contig87133	ref|XP_012216053.1| PREDICTED: carboxypeptidase D-like [Linepithema humile]	204.437438456017	1.1726182341924	0.240732274657649	4.87104704119964	1.11008404091632e-06	5.49426777827831e-05
Contig42856	ref|XP_012063323.1| PREDICTED: 4-nitrophenylphosphatase-like [Atta cephalotes]	25.3359221111455	1.17324249314019	0.339141583083544	3.45944747462941	0.000541284837452708	0.0100887578265959
Contig11645	ref|XP_011686001.1| PREDICTED: stAR-related lipid transfer protein 7, mitochondrial-like isoform X3 [Wasmannia auropunctata]	133.005898070153	1.17328998377015	0.278662674877813	4.21043106790176	2.54883886332875e-05	0.000785229971857031
Contig28379	ref|XP_012144276.1| PREDICTED: uncharacterized protein LOC100882592 isoform X1 [Megachile rotundata]	117.481756284063	1.17451570749699	0.222642024195245	5.27535496383646	1.32499367493806e-07	7.89142258379667e-06
Contig3638	#N/A	340.144488817282	1.1749875429543	0.307093171320919	3.82615978694757	0.000130157822038211	0.00313911130675617
Contig145847	ref|XP_011705986.1| PREDICTED: titin-like [Wasmannia auropunctata]	40.4617298379406	1.17532588952256	0.211444358216253	5.55855875956031	2.72011385800669e-08	1.83891087108534e-06
Contig105740	ref|XP_012054143.1| PREDICTED: uncharacterized protein LOC105617188 [Atta cephalotes]	47.0334139955278	1.17532990248388	0.266542740884304	4.40953634146821	1.03592173926813e-05	0.000381029267016837
Contig8640	#N/A	9.7350726059173	1.1754222976309	0.377096429731455	3.11703374775509	0.0018268065864039	0.0269752339295054
Contig8003	#N/A	130.440747370131	1.17651740398223	0.29728802179177	3.95750019422679	7.57382259225971e-05	0.00198514954972306
Contig49883	ref|XP_011168566.1| PREDICTED: golgin-84 isoform X1 [Solenopsis invicta]	20.4010368767948	1.17753248386757	0.382096884715437	3.08176415713131	0.00205777804177003	0.02966551624924
Contig40023	ref|XP_012216595.1| PREDICTED: histone acetyltransferase KAT8-like [Linepithema humile]	139.88689607676	1.18218547237148	0.221607575374493	5.33458962480734	9.5760880527315e-08	5.85505683130356e-06
Contig123987	ref|XP_011703583.1| PREDICTED: ubiquinone biosynthesis protein COQ9, mitochondrial [Wasmannia auropunctata]	127.203000088429	1.18220154758943	0.268322243189911	4.40590214786143	1.05344513747884e-05	0.000386531138728507
Contig112694	ref|XP_012522882.1| PREDICTED: cytochrome c [Monomorium pharaonis]	304.9696432681	1.18287196925752	0.314459506349712	3.76160346681342	0.000168827555371073	0.00388650145885125
Contig77302	ref|XP_012539060.1| PREDICTED: serine protease inhibitor 3/4-like isoform X1 [Monomorium pharaonis]	2330.46651020199	1.18498656467961	0.216248060052218	5.47975581558268	4.25913230765435e-08	2.77557889846342e-06
Contig147746	ref|XP_012061886.1| PREDICTED: mediator of RNA polymerase II transcription subunit 25 [Atta cephalotes]	189.840467966465	1.18548849445964	0.27619693435719	4.29218556396617	1.76922992306764e-05	0.000584061214184263
Contig2460	#N/A	14.9562076672117	1.18552787017464	0.393075330108673	3.01603224462569	0.00256106023560072	0.035353788964857
Contig58816	ref|XP_011686403.1| PREDICTED: sorting nexin-17 isoform X1 [Wasmannia auropunctata]	187.810989114583	1.18572852140755	0.279730149253146	4.23882990293801	2.24687814957562e-05	0.000710275369176102
Contig46874	#N/A	53.6596670174262	1.18743779785374	0.319793298929775	3.71314158810592	0.000204702288151134	0.00455687723331055
Contig86836	ref|XP_014603413.1| PREDICTED: ubiquitin [Polistes canadensis]	11.7154996256302	1.18854742132597	0.321716040109893	3.69439901386322	0.000220407466331897	0.00483662429435823
Contig29819	ref|XP_011706995.1| PREDICTED: peroxidase-like [Wasmannia auropunctata]	6200.93832175025	1.18886968440085	0.350695513101082	3.3900339182788	0.000698839765554517	0.0124205710398301
Contig15009	ref|XP_011064354.1| PREDICTED: bumetanide-sensitive sodium-(potassium)-chloride cotransporter [Acromyrmex echinatior]	154.392779359151	1.18890914999562	0.26944094704857	4.41250360429184	1.02182092983154e-05	0.000376660026034721
Contig125412	#N/A	1388.76408867519	1.18938841096327	0.288062695751628	4.12892203157322	3.64467959417251e-05	0.00106386047887239
Contig66317	#N/A	9.52271819728979	1.18976095432183	0.373145036746469	3.18846785339986	0.00143028912333852	0.022147434251248
Contig134868	ref|XP_016921060.1| PREDICTED: uncharacterized protein LOC108003370 [Apis cerana]	48.0133928924958	1.1898260986372	0.369247306081868	3.22230136561482	0.00127165304440878	0.020177133024974
Contig76033	ref|XP_011684288.1| PREDICTED: uncharacterized protein LOC105447781 [Wasmannia auropunctata]	16.2291621025021	1.19074928142027	0.402423110557195	2.95894855484706	0.00308690629656464	0.0411065768637448
Contig105918	#N/A	28.8389671023601	1.19107208406889	0.412642561758952	2.88644990713456	0.00389614762975131	0.0494360184001772
Contig126967	#N/A	512.121478827768	1.19170449820756	0.233451879619023	5.10471151550523	3.31299528427682e-07	1.82415161381209e-05
Contig2983	#N/A	20.7740645108646	1.19269427470097	0.272470999786352	4.37732557092746	1.20144442563343e-05	0.000430583203852673
Contig102219	ref|XP_012529226.1| PREDICTED: uncharacterized protein LOC105832641 [Monomorium pharaonis]	23.4883266859325	1.1935972531338	0.381127983322271	3.13174919020451	0.00173768252007487	0.025933099733403
Contig11041	ref|XP_012063008.1| PREDICTED: proteolipid protein DM beta [Atta cephalotes]	70.5566129411355	1.19614056126088	0.266080507761882	4.49540844356519	6.94365311199583e-06	0.000274375458371271
Contig26871	ref|XP_011639594.1| PREDICTED: protein CASC3 isoform X3 [Pogonomyrmex barbatus]	9.54218319521505	1.19637050532488	0.377123593222305	3.17235656115434	0.00151207233703132	0.0231677977532669
Contig1678	#N/A	67.55774266767	1.19752882685607	0.289250841309211	4.14010490491851	3.47147030884631e-05	0.00102232350589334
Contig29386	ref|XP_011167789.1| PREDICTED: histone deacetylase complex subunit SAP130-B isoform X1 [Solenopsis invicta]	834.926041957464	1.19787850669941	0.25890733247672	4.62666891370145	3.71593822872142e-06	0.000160437200557092
Contig37012	ref|XP_012225215.1| PREDICTED: protein transport protein Sec61 subunit beta [Linepithema humile]	186.459143253412	1.19809587977106	0.216422258468086	5.53591801625031	3.09602372285156e-08	2.07442767366992e-06
Contig118307	ref|XP_011644129.1| PREDICTED: pre-mRNA cleavage complex 2 protein Pcf11-like isoform X1 [Pogonomyrmex barbatus]	107.128072546582	1.19824700815461	0.241583676240952	4.95996677755455	7.05052365968951e-07	3.63140795892569e-05
Contig146556	ref|XP_011700823.1| PREDICTED: DE-cadherin isoform X2 [Wasmannia auropunctata]	18.5620583943919	1.19934870011524	0.250685542767883	4.78427549859051	1.71605178684865e-06	8.10026616852396e-05
Contig8131	ref|XP_011156622.1| PREDICTED: uncharacterized protein LOC105193745 [Solenopsis invicta]	7.39922846665582	1.19946856780364	0.407578878348749	2.94291149890575	0.00325141353184129	0.0428135930388508
Contig13791	#N/A	351.976105015901	1.20007348382123	0.246919714323422	4.86017686805412	1.17280926210546e-06	5.760570636406e-05
Contig69062	ref|XP_012532668.1| PREDICTED: uncharacterized protein LOC105834596 [Monomorium pharaonis]	1142.5953949629	1.20083515677141	0.399282576165508	3.00748199008224	0.00263421732927169	0.0361283119833992
Contig12595	#N/A	31.6496371414762	1.20094222369998	0.316916910837051	3.78945453093057	0.000150978442167295	0.00355095221229198
Contig82944	#N/A	38.4075564611153	1.20127279266863	0.364482304826464	3.29583295748904	0.000981303439440298	0.0163688172984325
Contig77303	ref|XP_011704357.1| PREDICTED: alaserpin-like isoform X3 [Wasmannia auropunctata]	4285.58572720354	1.20142574961351	0.277334237231068	4.33204988179125	1.47727460656804e-05	0.000509015170199084
Contig9448	#N/A	31.0898017880219	1.20215720392111	0.360141324440802	3.33801516887216	0.000843791428431068	0.0144774709988931
Contig29677	#N/A	120.686663142177	1.20321747605977	0.324793218414487	3.7045646517295	0.000211754096415249	0.00468593602586058
Contig16543	ref|XP_012061283.1| PREDICTED: dnaJ protein homolog 1-like [Atta cephalotes]	122.392825909038	1.20390058301438	0.375907161303909	3.20265402456929	0.00136167461954549	0.0213112685349154
Contig306	#N/A	239.241219303078	1.2039886338639	0.294895723300442	4.08276057851565	4.45038665118378e-05	0.00126183302386293
Contig85882	ref|XP_011060374.1| PREDICTED: translocating chain-associated membrane protein 1 [Acromyrmex echinatior]	33.0693609066229	1.20449084984744	0.366138452296483	3.28971415674225	0.0010028920643607	0.0166592607075222
Contig1990	#N/A	24.0609557795797	1.2053439329806	0.31673950904207	3.80547389438716	0.000141532942476691	0.00336026758771603
Contig22633	ref|XP_011057475.1| PREDICTED: limulus clotting factor C-like isoform X2 [Acromyrmex echinatior]	1649.28110727399	1.20539524753437	0.283001008479583	4.25933198616617	2.05038749935179e-05	0.000660007715018024
Contig879	#N/A	170.034621499539	1.20754856221019	0.308363384552813	3.91599204931989	9.00332150189914e-05	0.00229506850029803
Contig33348	#N/A	166.110877635078	1.20881414456358	0.268592096003804	4.50055739743907	6.77754998607448e-06	0.000269145143136605
Contig36347	ref|XP_011163603.1| PREDICTED: signal-induced proliferation-associated 1-like protein 1 isoform X1 [Solenopsis invicta]	112.039548200165	1.20912253106925	0.232798905044143	5.19384973412988	2.05989423823023e-07	1.17472875199056e-05
Contig1124	#N/A	58.5214036142095	1.20921410630026	0.318482685083522	3.79679700949251	0.000146577718885777	0.0034636680203826
Contig10239	#N/A	15.1198751833757	1.20974725727989	0.378468824734374	3.19642511672909	0.00139141938418596	0.0216510651554951
Contig118262	#N/A	5.51878515951325	1.21059874034254	0.399072717128385	3.03352920002566	0.00241711318118124	0.0338281101086391
Contig15961	#N/A	659.438124363295	1.21060537965906	0.305438817740553	3.96349550006239	7.38602564530963e-05	0.00194042712487993
Contig29385	ref|XP_011167797.1| PREDICTED: ribosome biogenesis protein TSR3 homolog [Solenopsis invicta]	387.324179083655	1.21077152649547	0.248952504888409	4.8634639247281	1.15349056962391e-06	5.68008242951987e-05
Contig143444	#N/A	12.6644562647817	1.21080953917986	0.381209725509675	3.17622940380394	0.00149202912786626	0.0229098775075244
Contig15008	ref|XP_011064354.1| PREDICTED: bumetanide-sensitive sodium-(potassium)-chloride cotransporter [Acromyrmex echinatior]	575.38078585006	1.21133100563487	0.258020612872555	4.69470633430822	2.66989999270768e-06	0.00012001187192942
Contig13333	ref|XP_012524744.1| PREDICTED: uncharacterized protein LOC105830126 [Monomorium pharaonis]	245.127561757034	1.21261845023628	0.283666322465346	4.27480583418364	1.91303939460424e-05	0.000623568908520173
Contig68432	ref|XP_011868400.1| PREDICTED: dual specificity tyrosine-phosphorylation-regulated kinase 4 isoform X9 [Vollenhovia emeryi]	1431.33841119732	1.21349695551674	0.367607963445914	3.30106275212746	0.000963193370634812	0.0161262352796629
Contig58700	ref|XP_011174090.1| PREDICTED: conserved oligomeric Golgi complex subunit 4-like [Solenopsis invicta]	23.3833831260554	1.21351042941639	0.319830529368865	3.79422949963865	0.000148102641519051	0.0034942226212534
Contig83241	ref|XP_011159177.1| PREDICTED: geranylgeranyl pyrophosphate synthase [Solenopsis invicta]	49.9305211276741	1.21360563956528	0.295595965748165	4.105623148454	4.03226394915275e-05	0.00115903230860619
Contig6283	#N/A	102.323114684547	1.21405369163932	0.314784552468332	3.85677658614285	0.000114892082157714	0.00281753613557618
Contig130510	ref|XP_011158423.1| PREDICTED: cyclic AMP response element-binding protein A-like [Solenopsis invicta]	88.1974174168625	1.21492335090595	0.280734740084143	4.3276558880522	1.50704677274614e-05	0.000516907741904886
Contig91988	ref|XP_011067527.1| PREDICTED: trehalase isoform X2 [Acromyrmex echinatior]	99.8017640529561	1.21575184986851	0.325473827154305	3.73532907545322	0.000187469876902363	0.00423513907816708
Contig58000	#N/A	12.8955165739998	1.21591403011813	0.396607205445945	3.06578905633084	0.00217096418542967	0.0310066248776404
Contig69148	ref|XP_012528902.1| PREDICTED: lipid storage droplets surface-binding protein 2-like [Monomorium pharaonis]	530.508277310242	1.21634166565513	0.296581347683917	4.10120756127742	4.10999688192083e-05	0.00117763177085318
Contig1569	#N/A	55.0493158969785	1.21646296268063	0.310600623770273	3.91648589727353	8.98490692056306e-05	0.00229166666752913
Contig118406	ref|XP_011859024.1| PREDICTED: uncharacterized protein LOC105556537 [Vollenhovia emeryi]	125.975659474896	1.2170638148735	0.336092492799852	3.62121689995106	0.000293220550313168	0.00610826600770659
Contig24555	ref|XP_011879944.1| PREDICTED: uncharacterized protein LOC105568691 isoform X1 [Vollenhovia emeryi]	19.4416780761308	1.21730258038807	0.265062886809965	4.59250480155226	4.37957430736335e-06	0.000184849740790021
Contig111848	ref|XP_012538176.1| PREDICTED: serine/threonine-protein kinase pelle [Monomorium pharaonis]	41.0144638750058	1.21731853314864	0.297342537408217	4.09399389592684	4.24005477409003e-05	0.00120902184216452
Contig39359	ref|XP_011054756.1| PREDICTED: GTP-binding protein 2 [Acromyrmex echinatior]	16.9927810568166	1.21836970651897	0.320399839844889	3.80265391864365	0.000143154270483525	0.00339341430472867
Contig135053	ref|XP_011643111.1| PREDICTED: alaserpin-like isoform X5 [Pogonomyrmex barbatus]	196.127871748027	1.21846240090614	0.219869066330395	5.54176365617149	2.9944028643614e-08	2.01031163389855e-06
Contig15150	ref|XP_011708101.1| PREDICTED: uncharacterized protein LOC105462898 [Wasmannia auropunctata]	69.40755634762	1.21850075221775	0.320077362248955	3.80689450717857	0.000140722735634289	0.00334571757894607
Contig63325	#N/A	12.9938512536397	1.21887420026817	0.371637162489026	3.27974251042282	0.00103901868722853	0.0171491437060224
Contig34844	ref|XP_011684960.1| PREDICTED: anaphase-promoting complex subunit 1 [Wasmannia auropunctata]	430.626846034419	1.21994067457705	0.249262962191836	4.89419151505617	9.87106782292995e-07	4.93786422625903e-05
Contig52955	ref|XP_011878252.1| PREDICTED: uncharacterized protein LOC105567749 isoform X1 [Vollenhovia emeryi]	120.010501193706	1.21997717487233	0.30031314981446	4.06235016890222	4.85811291769598e-05	0.00135697838325388
Contig111850	ref|XP_011640598.1| PREDICTED: LOW QUALITY PROTEIN: serine/threonine-protein kinase pelle [Pogonomyrmex barbatus]	26.3578682612157	1.22134979531191	0.267428140500965	4.56702048267617	4.94705687333719e-06	0.000204726936472612
Contig35301	#N/A	229.155790721653	1.22261631092183	0.311026025943671	3.93091319998813	8.46238218910648e-05	0.00217599070571385
Contig145100	ref|XP_012526136.1| PREDICTED: N-(5-amino-5-carboxypentanoyl)-L-cysteinyl-D-valine synthase [Monomorium pharaonis]	326.53426837585	1.22589689347448	0.284017175708686	4.31627731814315	1.58682603337592e-05	0.000535446194800303
Contig117206	ref|XP_011696814.1| PREDICTED: myosin-IA [Wasmannia auropunctata]	849.025280048375	1.22626523344533	0.291326614152464	4.20924547869688	2.56224893200287e-05	0.0007882583893848
Contig15117	ref|XP_012539076.1| PREDICTED: antichymotrypsin-2-like isoform X16 [Monomorium pharaonis]	42100.6897318492	1.22659316901285	0.2519186641608	4.86900473650462	1.12161719667873e-06	5.54325781743402e-05
Contig80485	#N/A	9.67045151604438	1.22702802450206	0.317213145424798	3.8681499874757	0.000109664206379732	0.00271167850827696
Contig4483	#N/A	46.1699628247496	1.22845257090579	0.320836124802532	3.82890976401698	0.000128712185736383	0.0031086686298226
Contig12254	#N/A	1512.77057995789	1.22870307392988	0.187197522439645	6.56367166571893	5.2498732076758e-11	5.43478095561638e-09
Contig72032	ref|XP_012225306.1| PREDICTED: uncharacterized protein LOC105673904 [Linepithema humile]	20.8743268539495	1.22933613002799	0.366741662088314	3.35204929548461	0.000802157342552371	0.0139020787032456
Contig107670	ref|XP_011642110.1| PREDICTED: solute carrier family 25 member 38-like isoform X2 [Pogonomyrmex barbatus]	53.1583048183062	1.22934410320142	0.392396969497788	3.13290926985192	0.00173082935992176	0.0258450443532735
Contig13890	ref|XP_011172819.1| PREDICTED: cytochrome P450 9e2-like [Solenopsis invicta]	43.516812869768	1.22981787671856	0.278256631371616	4.41972531133002	9.8826437490099e-06	0.000367084319194256
Contig63945	ref|XP_011684760.1| PREDICTED: uncharacterized protein LOC105448098 [Wasmannia auropunctata]	34.1236668929988	1.22999831348928	0.400544057668706	3.07081902712093	0.00213472495927796	0.0305733013652468
Contig41653	ref|XP_011867279.1| PREDICTED: sodium-dependent phosphate transport protein 1, chloroplastic-like [Vollenhovia emeryi]	63.3898511981784	1.23004493661923	0.415755598998081	2.9585769610403	0.00309063056896303	0.0411479259748039
Contig50982	ref|XP_012522958.1| PREDICTED: myosin-IA [Monomorium pharaonis]	49.002391147248	1.23024631019932	0.322244975891362	3.81773620146082	0.000134681821722423	0.00322356875592388
Contig20402	ref|XP_011689220.1| PREDICTED: uncharacterized protein LOC105450847 [Wasmannia auropunctata]	569.485549828938	1.23059986356222	0.255993072495251	4.80716080152929	1.53088854228553e-06	7.29736094107239e-05
Contig45980	ref|XP_013793579.1| PREDICTED: actin-85C, partial [Limulus polyphemus]	583.087603877458	1.23113587627999	0.181614311797949	6.77884834125658	1.21137603867274e-11	1.45123277481064e-09
Contig21356	#N/A	47.074720929722	1.23164973519552	0.223140103745077	5.51962517953562	3.3972351411995e-08	2.25702088076419e-06
Contig2092	ref|XP_011867279.1| PREDICTED: sodium-dependent phosphate transport protein 1, chloroplastic-like [Vollenhovia emeryi]	129.879057795218	1.23194270011606	0.253775095310791	4.85446650549904	1.20711269503041e-06	5.91193142014643e-05
Contig117294	#N/A	251.316316994624	1.23241071378194	0.283040259823538	4.35418874526999	1.33560597132e-05	0.000469971116228829
Contig116549	ref|XP_012056419.1| PREDICTED: uncharacterized protein LOC105619511 [Atta cephalotes]	93.5732529447829	1.23283914770477	0.265899039945325	4.63649341478733	3.54369479484038e-06	0.000153980975939597
Contig105717	ref|XP_011632620.1| PREDICTED: multiple C2 and transmembrane domain-containing protein 2 isoform X8 [Pogonomyrmex barbatus]	11.887673295121	1.23505891669723	0.402345130307668	3.06965046588933	0.00214309423193528	0.0306802049160426
Contig24766	ref|XP_011882485.1| PREDICTED: knirps-related protein-like [Vollenhovia emeryi]	68.518810309585	1.23545656182071	0.37681967592073	3.27864132572687	0.00104308119799519	0.0172025311425172
Contig18314	ref|XP_012062001.1| PREDICTED: LOW QUALITY PROTEIN: lipid storage droplets surface-binding protein 2-like, partial [Atta cephalotes]	92.6340448034052	1.23647116730537	0.345638976527883	3.57734876930357	0.000347096914689514	0.00702031334656282
Contig132087	ref|XP_011693477.1| PREDICTED: endoribonuclease Dicer-like isoform X2 [Wasmannia auropunctata]	92.3394299161325	1.23647955305833	0.367930258101394	3.36063567981293	0.000777633256393098	0.0135480416794057
Contig114918	#N/A	7.37438255381943	1.23657449556937	0.428307237767517	2.88712024110266	0.00388785621343738	0.0493533110857016
Contig116227	ref|XP_011869650.1| PREDICTED: uncharacterized protein LOC105563014 isoform X3 [Vollenhovia emeryi]	77.2466500081716	1.23786226409316	0.356218063434397	3.47501261490949	0.000510829328124095	0.00963767508405968
Contig12159	#N/A	62.2465728791714	1.23799416388357	0.309963661721252	3.99399773834421	6.49684832707315e-05	0.00173506023833733
Contig57110	ref|XP_011066451.1| PREDICTED: dachshund homolog 2 isoform X2 [Acromyrmex echinatior]	11.5441477403551	1.24098050486232	0.391925464392288	3.16636865325033	0.00154355036750789	0.0235595992728436
Contig61210	ref|XP_011881734.1| PREDICTED: ATP-binding cassette sub-family C member Sur [Vollenhovia emeryi]	101.284895197092	1.24117456034952	0.419472618610033	2.95889291764094	0.00308746365587755	0.0411097983532821
Contig15362	#N/A	49.4168102275732	1.2428364146838	0.352981735192865	3.52096522502709	0.000429979001603961	0.00835643054220687
Contig21927	ref|XP_011173609.1| PREDICTED: calcium-binding mitochondrial carrier protein SCaMC-2 isoform X3 [Solenopsis invicta]	215.591723353466	1.24352291651294	0.344937370475649	3.60506869637867	0.000312070368496433	0.0064210455095244
Contig101232	ref|XP_011862876.1| PREDICTED: uncharacterized protein LOC105559276, partial [Vollenhovia emeryi]	11.2347703818632	1.24417707073876	0.431448898789583	2.88371826705147	0.00393010185496952	0.0497923050224063
Contig17491	ref|XP_011867869.1| PREDICTED: cytosolic carboxypeptidase 1-like isoform X2 [Vollenhovia emeryi]	1304.62947467506	1.24507848330771	0.420148230870043	2.96342669521516	0.00304234515534682	0.0406287145147419
Contig15838	ref|XP_011058112.1| PREDICTED: uncharacterized protein LOC105148226 isoform X1 [Acromyrmex echinatior]	498.797152621028	1.24614055207621	0.20808706118473	5.98855375716966	2.11715164111794e-09	1.66443711686127e-07
Contig133340	ref|XP_011161853.1| PREDICTED: uncharacterized protein LOC105197254 [Solenopsis invicta]	1410.02503865188	1.24726402563718	0.282290843162862	4.41836515723463	9.94502958367152e-06	0.000368663612379591
Contig130978	ref|XP_012062405.1| PREDICTED: translocon-associated protein subunit alpha [Atta cephalotes]	220.138254588077	1.2487325836291	0.211017235336872	5.91768052327861	3.265134031771e-09	2.50734930115851e-07
Contig36509	#N/A	378.632222444189	1.24919281440421	0.299430820456022	4.17189123184358	3.02081837250008e-05	0.000908519440057724
Contig97982	ref|XP_011701207.1| PREDICTED: vanin-like protein 1 [Wasmannia auropunctata]	143.819938841091	1.24927143702459	0.350520285845895	3.56404889380303	0.000365177886886898	0.00732158988058541
Contig9186	ref|XP_011863865.1| PREDICTED: transport and Golgi organization protein 1-like isoform X2 [Vollenhovia emeryi]	139.869564163772	1.25144294608212	0.342863112069103	3.64997837921361	0.000262262383020301	0.00559572857314586
Contig123856	#N/A	15.7414421821969	1.25190568637887	0.375939008908562	3.33007657282876	0.000868221040201962	0.0148029831714796
Contig27406	ref|XP_011690470.1| PREDICTED: uncharacterized protein LOC105451606 isoform X1 [Wasmannia auropunctata]	43.9152603139032	1.25202638442637	0.308606338615685	4.0570339223834	4.96998656695547e-05	0.00138369894947875
Contig15186	ref|XP_014371867.1| PREDICTED: RNA-directed DNA polymerase from mobile element jockey-like [Papilio machaon]	111.649931720016	1.25235577272072	0.369856358481366	3.38605986892562	0.000709039131012234	0.0125578728892638
Contig140696	#N/A	51.9808283689944	1.25242649811138	0.380362022314351	3.29272226099458	0.000992224379684511	0.0165083446235474
Contig20401	ref|XP_011866872.1| PREDICTED: cyclic AMP response element-binding protein A-like [Vollenhovia emeryi]	2186.471786343	1.25315853071998	0.255833152407884	4.89834299786926	9.66482177833913e-07	4.84541641644245e-05
Contig116441	ref|XP_012059873.1| PREDICTED: protein BTG3-like [Atta cephalotes]	44.0304163538446	1.25324495140362	0.269140335843101	4.65647390785087	3.21671024793646e-06	0.000141587453282588
Contig68244	#N/A	488.626539819519	1.25346037333356	0.393931830546721	3.18192203862769	0.00146301194390402	0.0225453593857152
Contig21043	ref|XP_014477476.1| PREDICTED: rho GTPase-activating protein 24 isoform X3 [Dinoponera quadriceps]	72.0388738286949	1.25347517949463	0.288630935196825	4.3428303298115	1.40658764339794e-05	0.00049036754928475
Contig64869	#N/A	27.7255247679474	1.25354761201266	0.359669320509844	3.48527811667594	0.000491625766535517	0.00934557565222142
Contig128920	#N/A	48.8883847663027	1.25459657177697	0.253076005839887	4.95739043933984	7.14463072673715e-07	3.67569025559838e-05
Contig6314	ref|XP_011882914.1| PREDICTED: protein fem-1 homolog CG6966 isoform X4 [Vollenhovia emeryi]	331.860925483538	1.25498467000176	0.292753308842915	4.2868334262796	1.81238090071788e-05	0.00059540751809582
Contig16541	ref|XP_011162126.1| PREDICTED: bone morphogenetic protein 2-like [Solenopsis invicta]	56.3491864137254	1.25602373677202	0.38094669209981	3.29711154557796	0.000976846972173825	0.0163118969034138
Contig147541	ref|XP_011058502.1| PREDICTED: RNA polymerase II elongation factor Ell [Acromyrmex echinatior]	134.802550852686	1.25702789019968	0.288383086397646	4.35888215880452	1.3072847840236e-05	0.000462043572323629
Contig106969	#N/A	10.6120364813561	1.25727619476181	0.384038791225849	3.27382603915764	0.00106101908948883	0.0174551470044288
Contig100188	ref|XP_011866686.1| PREDICTED: integrator complex subunit 3 homolog isoform X1 [Vollenhovia emeryi]	24.9380103485897	1.25735057124876	0.376849896267025	3.33647583216487	0.000848478053753151	0.0145413247544142
Contig115333	#N/A	33.3657233405773	1.25767496491375	0.278348995331964	4.518338438455	6.232680431598e-06	0.000250366920631141
Contig29637	ref|XP_011058790.1| PREDICTED: bromodomain adjacent to zinc finger domain protein 2B isoform X1 [Acromyrmex echinatior]	59.1462792656728	1.25840007905546	0.292667895950325	4.29975441949072	1.70987479252065e-05	0.000568479921826171
Contig134870	ref|XP_012524744.1| PREDICTED: uncharacterized protein LOC105830126 [Monomorium pharaonis]	1448.12414365599	1.25945957492599	0.276427078013427	4.55620912385732	5.20850821472704e-06	0.000214109315862987
Contig21815	ref|XP_011173344.1| PREDICTED: glutamine--fructose-6-phosphate aminotransferase [isomerizing] 2-like [Solenopsis invicta]	20.3082274127716	1.25986798260962	0.436677222863406	2.8851241068823	0.00391259387796709	0.0496056638949612
Contig13528	ref|XP_012064068.1| PREDICTED: uncharacterized protein LOC105627397 [Atta cephalotes]	104.191498946887	1.25990333190575	0.241456293304274	5.21793536488224	1.80928574846204e-07	1.0454387622153e-05
Contig2408	ref|XP_011065272.1| PREDICTED: mesencephalic astrocyte-derived neurotrophic factor homolog [Acromyrmex echinatior]	408.705856978695	1.25999994678542	0.230022456215473	5.47772581649645	4.30827013987757e-08	2.80087126917237e-06
Contig7153	ref|XP_011630864.1| PREDICTED: ornithine decarboxylase 1-like [Pogonomyrmex barbatus]	544.684937833188	1.26108959828976	0.278679758628071	4.52522854368059	6.03302739190643e-06	0.000243428436990776
Contig5117	ref|XP_012524306.1| PREDICTED: probable chitinase 3 [Monomorium pharaonis]	270.022528263444	1.26196075095359	0.254345399936834	4.96160241650525	6.99139897318422e-07	3.60780662233411e-05
Contig68235	#N/A	595.792810446656	1.26226834506099	0.331385583693105	3.8090623345582	0.000139494790436533	0.00332118091823385
Contig68460	ref|XP_011638890.1| PREDICTED: LOW QUALITY PROTEIN: uncharacterized protein LOC105428330 [Pogonomyrmex barbatus]	167.941588642726	1.26228535357803	0.279332258982465	4.51893869392747	6.21503860976158e-06	0.000249732221044209
Contig25333	ref|XP_011874845.1| PREDICTED: translocon-associated protein subunit gamma [Vollenhovia emeryi]	1435.01305760447	1.26260581693663	0.208995183734353	6.04131537567626	1.52862854344629e-09	1.22375107019437e-07
Contig63619	ref|XP_012062655.1| PREDICTED: 6-phosphofructo-2-kinase/fructose-2,6-bisphosphatase-like [Atta cephalotes]	23.3537530628136	1.26272398160186	0.396038630302725	3.18838589214556	0.0014306946463395	0.0221511843553698
Contig105919	#N/A	227.543979445351	1.26343917420913	0.312182222511517	4.0471208259225	5.18514797494461e-05	0.0014350584846411
Contig130421	ref|XP_012530004.1| PREDICTED: mesencephalic astrocyte-derived neurotrophic factor homolog [Monomorium pharaonis]	160.71570291468	1.26355136015232	0.230635112730442	5.47857325449448	4.28769072102229e-08	2.79016741574241e-06
Contig13256	#N/A	754.906308539221	1.26656714015659	0.367652496575414	3.4450116671431	0.000571034743376338	0.0105303652010115
Contig13384	#N/A	29.8760840212692	1.26671255107043	0.420733810937124	3.01072202457182	0.0026062732881533	0.0358283979421816
Contig93063	ref|XP_011694545.1| PREDICTED: succinyl-CoA ligase [ADP-forming] subunit beta, mitochondrial-like [Wasmannia auropunctata]	357.335605748221	1.26797034596187	0.378833274459037	3.34704058869301	0.000816792500396627	0.014110636706852
Contig26012	ref|XP_011685463.1| PREDICTED: histone acetyltransferase KAT8 [Wasmannia auropunctata]	77.8010898381983	1.26963612863695	0.243845150079498	5.20673110875088	1.92196282561263e-07	1.10489642489458e-05
Contig24198	#N/A	444.458282352539	1.27202157656029	0.386771656507506	3.28881797608043	0.00100609067126392	0.016700119986877
Contig104860	ref|XP_012532888.1| PREDICTED: peroxidase-like isoform X2 [Monomorium pharaonis]	306.198154009671	1.27265764057682	0.367326759633965	3.46464723083339	0.000530927428475862	0.00993393933296435
Contig15245	ref|XP_011164472.1| PREDICTED: cytochrome c [Solenopsis invicta]	262.357150552527	1.27278245498426	0.306418008031106	4.15374560771589	3.27076788832434e-05	0.000973150321209339
Contig37346	#N/A	232.312153658568	1.27315582347399	0.244790770037069	5.20099603135035	1.98223335546413e-07	1.13377728497643e-05
Contig22906	ref|XP_012535588.1| PREDICTED: uncharacterized protein LOC105836235 [Monomorium pharaonis]	152.917982399275	1.27351834609805	0.388788351943308	3.27560828335658	0.00105434687156969	0.0173629868416577
Contig30450	ref|XP_012532232.1| PREDICTED: translocon-associated protein subunit beta [Monomorium pharaonis]	94.8078052131297	1.27419043329356	0.279050407881813	4.56616581557988	4.96725904421487e-06	0.000205312364529764
Contig55209	#N/A	40.0656661917056	1.27432894786856	0.320972762191944	3.97020899582284	7.18096142495711e-05	0.00189315494300959
Contig16766	ref|XP_011686939.1| PREDICTED: CD109 antigen-like isoform X5 [Wasmannia auropunctata]	335.094537940892	1.27455871959834	0.4099829078304	3.10880940462423	0.00187842851109564	0.0275544839484829
Contig28677	ref|XP_011629994.1| PREDICTED: MAGUK p55 subfamily member 6 isoform X1 [Pogonomyrmex barbatus]	197.489464991168	1.27483937206905	0.229600445691747	5.55242551131892	2.81732781255175e-08	1.90084126353927e-06
Contig15322	ref|XP_012524804.1| PREDICTED: adenosylhomocysteinase [Monomorium pharaonis]	24.6072704440431	1.27508401768344	0.300103256407629	4.24881766678167	2.14901741595672e-05	0.0006842846861882
Contig116442	#N/A	705.775545590284	1.27512172612471	0.254977700538149	5.00091468168969	5.70589603694769e-07	3.00154920540971e-05
Contig111547	ref|XP_011874438.1| PREDICTED: uncharacterized protein LOC105565669 isoform X1 [Vollenhovia emeryi]	68.7231474050791	1.27555898332352	0.318003636804685	4.01114589801674	6.0424753381167e-05	0.00163659726483595
Contig20983	#N/A	159.863265098572	1.27647688572336	0.283242432214815	4.50665839769115	6.58565278899478e-06	0.000262369775947925
Contig17272	ref|XP_011865647.1| PREDICTED: ankyrin-3-like isoform X2 [Vollenhovia emeryi]	78.6864795194164	1.27650754653665	0.317467318196336	4.0209101012004	5.79737278087327e-05	0.00158062909590942
Contig79616	ref|XP_012063430.1| PREDICTED: heat shock 70 kDa protein cognate 4 isoform X2 [Atta cephalotes]	9.98535730218145	1.27706120184672	0.333457204659266	3.82976041303906	0.000128268081038049	0.00309856656608421
Contig6586	ref|XP_011629692.1| PREDICTED: sphingomyelin synthase-related protein 1 isoform X1 [Pogonomyrmex barbatus]	322.291799909891	1.27817223920765	0.243629871760575	5.24636913351807	1.55125945334171e-07	9.0998566250016e-06
Contig104119	ref|XP_012063768.1| PREDICTED: golgin subfamily A member 5 [Atta cephalotes]	184.122908657296	1.2811380478605	0.39182572040234	3.26966296787506	0.00107675692906918	0.0176463219551405
Contig59659	ref|XP_011162206.1| PREDICTED: S-adenosylmethionine synthase-like [Solenopsis invicta]	33.9735753213562	1.28144418624492	0.319450747683043	4.01139830017351	6.03601778402461e-05	0.00163550152999543
Contig139465	ref|XP_011861692.1| PREDICTED: DNA-directed RNA polymerase I subunit RPA1 [Vollenhovia emeryi]	162.517491850284	1.28173449446967	0.299245565992292	4.2832196701711	1.84208143409483e-05	0.0006035564909479
Contig15960	ref|XP_011882400.1| PREDICTED: metal transporter CNNM4 [Vollenhovia emeryi]	28.807718245049	1.28301274516104	0.342768335383432	3.74309004863537	0.000181771051019981	0.00412702148217373
Contig4238	ref|XP_012060375.1| PREDICTED: growth factor receptor-bound protein 7-like [Atta cephalotes]	684.293056395053	1.28302254552463	0.271013245894339	4.73416914103471	2.19954248492791e-06	0.000101097021197542
Contig63185	ref|XP_011861621.1| PREDICTED: filaggrin-2-like [Vollenhovia emeryi]	729.692038867318	1.28313910261873	0.300428830414404	4.27102519038801	1.94576426050733e-05	0.000632182257844851
Contig72368	#N/A	7.50517770365072	1.28372275902189	0.375087655890758	3.42246069381651	0.000620570695169869	0.0112948697161142
Contig101396	#N/A	69.0692102476115	1.28466316476399	0.420549639213321	3.05472421083769	0.00225267564670753	0.0319537701954396
Contig2205	ref|XP_011703006.1| PREDICTED: sodium/potassium-transporting ATPase subunit beta-2-like [Wasmannia auropunctata]	20.2794468284021	1.28494901747742	0.400445462370791	3.20879904561791	0.00133290616721627	0.0209650587985233
Contig106154	ref|XP_011860855.1| PREDICTED: 10 kDa heat shock protein, mitochondrial [Vollenhovia emeryi]	55.2864214501623	1.28508610218598	0.364402518787856	3.52655658490144	0.00042100119259092	0.00822201263422019
Contig43887	#N/A	12.6128923237081	1.28530797842855	0.395024645818494	3.25374123370298	0.00113895976174238	0.0184870004941869
Contig65954	ref|XP_011699097.1| PREDICTED: bone morphogenetic protein 2-like isoform X1 [Wasmannia auropunctata]	60.6464802565412	1.28721000580689	0.401553020712602	3.20557918733269	0.00134790952864255	0.0211421932474359
Contig12136	ref|XP_011693446.1| PREDICTED: uncharacterized protein LOC105453305 [Wasmannia auropunctata]	8549.02131472803	1.28743118813663	0.312081998851149	4.12529781556123	3.70255327500589e-05	0.00107820068678688
Contig129187	ref|XP_011636098.1| PREDICTED: uncharacterized protein LOC105426532 [Pogonomyrmex barbatus]	19.0703117159719	1.28841459270299	0.403116647567544	3.1961334280721	0.00139282685603011	0.0216608204813213
Contig23765	ref|XP_011864448.1| PREDICTED: esterase E4 [Vollenhovia emeryi]	594.36768966709	1.28865711125676	0.261285987684537	4.93197940952201	8.14004991360009e-07	4.14223162845389e-05
Contig21796	ref|XP_012055062.1| PREDICTED: uncharacterized protein DDB_G0284459-like [Atta cephalotes]	1576.8075507513	1.28909556076475	0.279210378562129	4.6169328210624	3.89453272720825e-06	0.000166978552408353
Contig90632	#N/A	43.4559642801894	1.29095688242328	0.421231232474531	3.06472261052328	0.00217871966090076	0.0310819364710073
Contig7757	#N/A	13.7069295092389	1.2917093870546	0.368575888941478	3.50459546001311	0.000457301588032559	0.00879043197157299
Contig59146	#N/A	39.875234792113	1.29179153342562	0.267644636461599	4.82651754394847	1.38941159552977e-06	6.71024444858172e-05
Contig50844	ref|XP_011686939.1| PREDICTED: CD109 antigen-like isoform X5 [Wasmannia auropunctata]	65.6616621104516	1.29298136187288	0.332861992646822	3.88443676489306	0.000102567382482919	0.00256255950774477
Contig1382	#N/A	4.32066121327765	1.29321238893709	0.429334186938132	3.01213466870609	0.00259417483658846	0.0357091378693776
Contig5903	ref|XP_015114023.1| PREDICTED: phosphatidylcholine:ceramide cholinephosphotransferase 2-like isoform X1 [Diachasma alloeum]	20.9784285304908	1.29384265585414	0.379639024835202	3.40808655384093	0.000654201401385242	0.011778925763072
Contig10379	ref|XP_011882912.1| PREDICTED: protein fem-1 homolog CG6966 isoform X2 [Vollenhovia emeryi]	372.347698485903	1.29702520062779	0.31324875701135	4.14055976790611	3.46459319343796e-05	0.00102051985520177
Contig122091	ref|XP_011166837.1| PREDICTED: phospholipid-transporting ATPase ID isoform X5 [Solenopsis invicta]	13.1067989511326	1.29734533221637	0.391584298899889	3.31306780139324	0.000922786066804692	0.0155611427087356
Contig10489	ref|XP_011883732.1| PREDICTED: uncharacterized protein LOC105570890 [Vollenhovia emeryi]	30.9139279340423	1.30004027875935	0.450447212769315	2.88611016320159	0.00390035608079747	0.0494801580487622
Contig17921	#N/A	38.5173174455675	1.30036136873119	0.315940859633684	4.11583791421878	3.85775347287321e-05	0.0011176359313613
Contig46797	ref|XP_011875546.1| PREDICTED: matrix metalloproteinase-14 isoform X3 [Vollenhovia emeryi]	165.864190979306	1.30061442841335	0.327002720203572	3.97738106766717	6.96784536298502e-05	0.00184486017386929
Contig13058	ref|XP_011876002.1| PREDICTED: protein unzipped [Vollenhovia emeryi]	142.19911043694	1.30069618402639	0.265045279389747	4.90744897257244	9.22686504152949e-07	4.64129108212901e-05
Contig85021	ref|XP_011873772.1| PREDICTED: uncharacterized protein LOC105565299 isoform X2 [Vollenhovia emeryi]	527.769075432486	1.30304968403087	0.308492525238937	4.22392627834863	2.4008261256084e-05	0.000747956889956943
Contig123324	ref|XP_011634968.1| PREDICTED: prostaglandin E2 receptor EP3 subtype isoform X1 [Pogonomyrmex barbatus]	109.341496164594	1.30388927730773	0.44684398462493	2.91799671064652	0.00352288066167025	0.0456436360037976
Contig69149	ref|XP_012062001.1| PREDICTED: LOW QUALITY PROTEIN: lipid storage droplets surface-binding protein 2-like, partial [Atta cephalotes]	852.954247310024	1.30399048429271	0.299722043232268	4.35066593778086	1.35724697347047e-05	0.000476103701656039
Contig118179	ref|XP_011638920.1| PREDICTED: asparagine synthetase [glutamine-hydrolyzing] isoform X2 [Pogonomyrmex barbatus]	488.756742522175	1.30465421674687	0.290569646909969	4.48998796199491	7.1227198873186e-06	0.000280468564453816
Contig70095	#N/A	428.64627078809	1.30634466821699	0.416580477817288	3.13587586980001	0.00171341708749068	0.0256528311882271
Contig51054	ref|XP_011875120.1| PREDICTED: uncharacterized protein LOC105566035 isoform X3 [Vollenhovia emeryi]	1962.69374833371	1.30719275991772	0.3331172837349	3.92412169450206	8.70467278724203e-05	0.00223363386067936
Contig18560	ref|XP_012058575.1| PREDICTED: alanine aminotransferase 1-like [Atta cephalotes]	68.7979152287439	1.30842709598587	0.321725386891475	4.06690658958546	4.76413282448598e-05	0.00133515831547808
Contig6391	ref|XP_012217309.1| PREDICTED: ras-related protein Rab-30 [Linepithema humile]	365.038831581347	1.30917612937908	0.284868690183603	4.59571786753852	4.312619090285e-06	0.000182480975135697
Contig9316	ref|XP_011879073.1| PREDICTED: sodium- and chloride-dependent transporter XTRP3 isoform X1 [Vollenhovia emeryi]	46.1007590355806	1.31043758199483	0.298866252694663	4.38469572987767	1.16148009179211e-05	0.000419140396935325
Contig21028	ref|XP_011878382.1| PREDICTED: lipid storage droplets surface-binding protein 2-like isoform X1 [Vollenhovia emeryi]	6652.170748326	1.31135078219831	0.283279523963561	4.62917603026965	3.67123594167965e-06	0.000158861196871393
Contig49327	ref|XP_011686511.1| PREDICTED: 1-acylglycerol-3-phosphate O-acyltransferase ABHD5 isoform X1 [Wasmannia auropunctata]	220.477145417023	1.31161729665751	0.324188768374372	4.04584434937259	5.21348666687622e-05	0.00144172467545218
Contig25584	ref|XP_012062001.1| PREDICTED: LOW QUALITY PROTEIN: lipid storage droplets surface-binding protein 2-like, partial [Atta cephalotes]	240.011683745067	1.31167804055947	0.2829709339909	4.63538082183964	3.56280948312825e-06	0.000154712406418493
Contig122799	#N/A	227.38186744178	1.31235053353838	0.280104207124865	4.68522249990111	2.7965596314674e-06	0.000125093134983764
Contig36397	ref|XP_011162545.1| PREDICTED: protein BTG4-like [Solenopsis invicta]	272.84235856214	1.31298247095533	0.252186830467057	5.20638793280226	1.92551891484618e-07	1.10647170388962e-05
Contig123134	#N/A	307.805052070969	1.31447030657742	0.283224830317698	4.64108427606068	3.46585725007656e-06	0.000151265479721121
Contig5205	ref|XP_011698651.1| PREDICTED: fas-associated death domain protein [Wasmannia auropunctata]	819.784596860935	1.31488331024355	0.283903168190163	4.63144993634877	3.63113805868956e-06	0.000157377167366931
Contig4444	ref|XP_011701263.1| PREDICTED: E3 ubiquitin-protein ligase RNF170-like isoform X2 [Wasmannia auropunctata]	24.2720818737966	1.3164939853727	0.310902568421838	4.23442621286569	2.29136003330937e-05	0.000720808396096535
Contig113238	#N/A	42.025265330646	1.31712005443433	0.370146713031721	3.55837295878258	0.000373159202711353	0.00745405981978161
Contig50874	#N/A	327.458072896276	1.31777715004672	0.374884335484241	3.51515661049038	0.000439494726573589	0.00851330350657774
Contig26609	ref|XP_011166272.1| PREDICTED: cell wall protein DAN4 [Solenopsis invicta]	23.2085633015343	1.31877729542939	0.398601469704806	3.30851087028364	0.000937935436498494	0.0157715035691639
Contig11070	ref|XP_011878221.1| PREDICTED: choline-phosphate cytidylyltransferase A-like isoform X3 [Vollenhovia emeryi]	15.8468657875109	1.31905070806455	0.361615163176457	3.64766426406984	0.000264635123345279	0.00563482926948448
Contig66215	ref|XP_011706280.1| PREDICTED: vitellogenin-1-like, partial [Wasmannia auropunctata]	650.554303004153	1.31914659504536	0.351821626462605	3.74947557462212	0.000177204754514415	0.00404161546900738
Contig87171	ref|XP_011703753.1| PREDICTED: putative ferric-chelate reductase 1 homolog [Wasmannia auropunctata]	238.642422275459	1.31936497399275	0.260275231714732	5.06911458804809	3.99670567683064e-07	2.16803697463084e-05
Contig129489	#N/A	492.362376305417	1.31985458276285	0.37138447247319	3.55387659040626	0.000379597293752634	0.00756039174547946
Contig59016	ref|XP_012227648.1| PREDICTED: kelch-like ECH-associated protein 1 [Linepithema humile]	13.5385136011773	1.32134203899354	0.404879858117704	3.26354105421913	0.00110029241719397	0.0179755518449997
Contig74237	#N/A	274.322424986308	1.32247737171198	0.257003838716433	5.14574948886716	2.66454808735082e-07	1.4858142447286e-05
Contig80952	ref|XP_011862229.1| PREDICTED: methyltransferase-like protein 16 homolog [Vollenhovia emeryi]	90.5053380649017	1.32425899792516	0.363600860603933	3.64206783153811	0.000270456781059995	0.00573716970227907
Contig2416	ref|XP_011700663.1| PREDICTED: geranylgeranyl pyrophosphate synthase [Wasmannia auropunctata]	68.6002787520202	1.32511332835738	0.261537027388911	5.06663756786878	4.04904159645412e-07	2.19204282260091e-05
Contig142033	#N/A	174.492683633845	1.32564951900516	0.30207034400333	4.38854573221707	1.14111141201899e-05	0.000413109137825797
Contig24842	ref|XP_011863192.1| PREDICTED: heat shock 70 kDa protein cognate 3 isoform X1 [Vollenhovia emeryi]	5569.72248618351	1.32660390046758	0.242695219613914	5.46613115238928	4.59964069311701e-08	2.96189778231894e-06
Contig15060	ref|XP_011163408.1| PREDICTED: serine/threonine-protein kinase pelle [Solenopsis invicta]	81.8077830896137	1.32734496845492	0.336553344684705	3.94393634595556	8.01549422984714e-05	0.00207895957849324
Contig2419	ref|XP_011052838.1| PREDICTED: eukaryotic translation initiation factor 6 [Acromyrmex echinatior]	12.3836352679299	1.32958398503599	0.385460658051953	3.449337713881	0.000561963404486607	0.0104006580290983
Contig3158	ref|XP_012056931.1| PREDICTED: translocon-associated protein subunit delta [Atta cephalotes]	2409.37477345625	1.32978950900502	0.229793491830242	5.78688934318206	7.17017777961748e-09	5.23345796235223e-07
Contig29480	#N/A	79.1041793242209	1.33145279839211	0.402316363897299	3.30946717029883	0.000934737273616684	0.015731380072506
Contig64870	#N/A	71.3660294549267	1.33237139445219	0.364044365877119	3.65991488768687	0.000252299036411105	0.00541638143483547
Contig50873	#N/A	40.3891032078571	1.3325424912235	0.424969555543016	3.13561871395896	0.00171492004587048	0.0256704291233228
Contig121667	ref|XP_011708014.1| PREDICTED: C-Maf-inducing protein-like [Wasmannia auropunctata]	30.3895737176637	1.33309943481019	0.41077073856591	3.24536124326754	0.00117301715181253	0.0189220349739389
Contig111442	ref|XP_014480439.1| PREDICTED: uncharacterized protein LOC106747441 isoform X2 [Dinoponera quadriceps]	41.4667306426913	1.33328843850207	0.342501817478506	3.89279230200214	9.90969890969457e-05	0.0024882316384731
Contig58918	#N/A	100.902745024154	1.33363660902456	0.414112018735792	3.22047308140418	0.00127979210972749	0.0202944021478699
Contig94678	#N/A	13.6537889461635	1.33468905873713	0.441483057985821	3.02319428706139	0.0025012160465204	0.034725625812123
Contig118181	ref|XP_012230229.1| PREDICTED: asparagine synthetase [glutamine-hydrolyzing] isoform X1 [Linepithema humile]	82.6538722665085	1.33525603108779	0.328318406412652	4.06695453257517	4.76315318502192e-05	0.00133515831547808
Contig77356	#N/A	20.9473328860118	1.3355939622283	0.422321539494147	3.16250495730826	0.00156418072403463	0.0238155164150929
Contig20605	ref|XP_011881417.1| PREDICTED: translocon-associated protein subunit alpha [Vollenhovia emeryi]	2113.34531288072	1.33625811897833	0.224402586652781	5.95473581169512	2.60492280645563e-09	2.02096110683452e-07
Contig21027	#N/A	86.8798145994897	1.33704353124227	0.412446938428988	3.24173464915287	0.00118804584798137	0.0191203419750734
Contig23395	ref|XP_011052969.1| PREDICTED: KN motif and ankyrin repeat domain-containing protein 1 isoform X3 [Acromyrmex echinatior]	64.6559921848462	1.33711918677827	0.413292978100583	3.23528164674711	0.001215227940356	0.0194755284688535
Contig115351	ref|XP_011878940.1| PREDICTED: 6-phosphofructo-2-kinase/fructose-2,6-bisphosphatase-like [Vollenhovia emeryi]	2335.81532223772	1.33715203450771	0.296954843349548	4.5028800319439	6.70387303971343e-06	0.000266531526944502
Contig35547	#N/A	974.639757219	1.3383567195226	0.363059986678987	3.68632393716788	0.000227516715724168	0.00496451357783062
Contig18143	#N/A	22.2738083037912	1.33925776283678	0.460559462155684	2.90789327520984	0.00363872495671954	0.0468047089329947
Contig5570	ref|XP_012523499.1| PREDICTED: glutamine--fructose-6-phosphate aminotransferase [isomerizing] 2-like isoform X3 [Monomorium pharaonis]	1586.37402566924	1.33936813996044	0.245662021374275	5.45207652557683	4.97850220008494e-08	3.18769875997318e-06
Contig77538	ref|XP_011708100.1| PREDICTED: transmembrane protein 41 homolog isoform X2 [Wasmannia auropunctata]	35.5395255121369	1.3396265989081	0.282430047996852	4.74321556225854	2.10352224546221e-06	9.7095665689623e-05
Contig130422	ref|XP_011871381.1| PREDICTED: sushi, von Willebrand factor type A, EGF and pentraxin domain-containing protein 1-like [Vollenhovia emeryi]	640.474502943314	1.33975953951118	0.203257618877637	6.59143576958721	4.35593270689764e-11	4.57926711715672e-09
Contig5585	ref|XP_012059427.1| PREDICTED: stress-associated endoplasmic reticulum protein 2 [Atta cephalotes]	1752.24089276209	1.33997079340078	0.229391158501207	5.84142301802678	5.17567945647682e-09	3.83968596176503e-07
Contig70094	ref|XP_012227184.1| PREDICTED: peroxidase-like isoform X2 [Linepithema humile]	61.3643104561857	1.34030950717895	0.373000124198536	3.59332187907139	0.000326488861691721	0.00666412710557812
Contig116655	#N/A	34.8150983616688	1.34093629534429	0.428441346551576	3.1298013278531	0.00174924564325176	0.0260655091378908
Contig16839	#N/A	6.69387466974666	1.34173185714584	0.444483877641022	3.01862885166211	0.00253921397010276	0.0351201390455395
Contig47502	ref|XP_011865885.1| PREDICTED: flocculation protein FLO11-like isoform X3 [Vollenhovia emeryi]	26.6603759460971	1.34205437554296	0.366079819306077	3.66601572871976	0.000246358779431988	0.00530105059353225
Contig23220	ref|XP_012524742.1| PREDICTED: uncharacterized protein LOC105830125 [Monomorium pharaonis]	301.187779634704	1.34302850291538	0.310020230701452	4.33206729727489	1.47715772888126e-05	0.000509015170199084
Contig715	#N/A	17.7767938244494	1.34372771752938	0.355461618778448	3.78023293245309	0.000156681705332223	0.00366033295209718
Contig52897	#N/A	7.71150138822823	1.34432205131701	0.349654381086464	3.84471673753911	0.000120691771962908	0.0029406205467082
Contig117116	ref|XP_011871555.1| PREDICTED: phospholipid-transporting ATPase ID isoform X3 [Vollenhovia emeryi]	52.4765217435471	1.34478391234438	0.324025683945404	4.15023863531437	3.32128823941837e-05	0.000986450248139473
Contig123472	ref|XP_011052261.1| PREDICTED: protein O-mannosyl-transferase 2 isoform X1 [Acromyrmex echinatior]	72.4997507689311	1.34526814082319	0.331889487480836	4.05336171095468	5.04868491572801e-05	0.00140330468571744
Contig9317	ref|XP_011861420.1| PREDICTED: antichymotrypsin-2-like isoform X6 [Vollenhovia emeryi]	593.485779136994	1.34536215335647	0.324790177521099	4.14225012475654	3.43914974626941e-05	0.00101478862856958
Contig35747	ref|XP_011630442.1| PREDICTED: baculoviral IAP repeat-containing protein 3-like isoform X2 [Pogonomyrmex barbatus]	13.4552741546708	1.34542944873064	0.40667817312544	3.30833946260411	0.000938509747008012	0.0157752926166019
Contig127354	#N/A	218.273649402396	1.34549537577541	0.243268509453645	5.53090648188394	3.18580145350152e-08	2.1303711948479e-06
Contig132241	ref|XP_011693103.1| PREDICTED: protein Tob1-like [Wasmannia auropunctata]	15.5457962427756	1.34561659116863	0.398046610261161	3.38055030863285	0.000723408306136018	0.0127656856250267
Contig7939	#N/A	16.8621387896841	1.34775183328383	0.361990203504667	3.72317211967439	0.000196735303436256	0.00440774185366007
Contig98431	ref|XP_011692802.1| PREDICTED: serine protease nudel-like isoform X2 [Wasmannia auropunctata]	258.189277140102	1.34807104099439	0.33994750572577	3.96552708370761	7.32339358069444e-05	0.00192621159242106
Contig79800	ref|XP_011859745.1| PREDICTED: autophagy-related protein 13 homolog isoform X2 [Vollenhovia emeryi]	62.0659838334162	1.34915984493479	0.387488717257683	3.48180420447594	0.000498047713972279	0.00944638098888283
Contig133376	ref|XP_011159247.1| PREDICTED: glutamine--fructose-6-phosphate aminotransferase [isomerizing] 1-like, partial [Solenopsis invicta]	174.028777203459	1.35042600371625	0.282101281077081	4.78702542065827	1.69271400658626e-06	8.00403477298427e-05
Contig5364	ref|XP_011162059.1| PREDICTED: kelch-like ECH-associated protein 1 [Solenopsis invicta]	348.95503930257	1.35087997819728	0.312775889170409	4.31900291860824	1.56735709609939e-05	0.000531123351400358
Contig39981	ref|XP_011163411.1| PREDICTED: uncharacterized protein LOC105198409 [Solenopsis invicta]	1351.89887676103	1.35187967426829	0.261594555425919	5.16784331412101	2.36810704147225e-07	1.33533666662045e-05
Contig29843	ref|XP_014467384.1| PREDICTED: uncharacterized protein LOC106740649 isoform X1 [Dinoponera quadriceps]	88.1136936744904	1.35310860382758	0.370311093541061	3.65397804016244	0.000258208361638472	0.00552400516725662
Contig73	#N/A	401.64709351486	1.35353106596787	0.356072792311657	3.8012762985361	0.000143952669406873	0.00340698033314898
Contig38960	#N/A	25.8651680874604	1.35364365984934	0.26950333646522	5.02273432902022	5.0940987068241e-07	2.70066888986412e-05
Contig5365	ref|XP_011162059.1| PREDICTED: kelch-like ECH-associated protein 1 [Solenopsis invicta]	510.115192408804	1.35406094867201	0.307142778197736	4.40857166369798	1.04054590086516e-05	0.000382418947967284
Contig9238	ref|XP_011879037.1| PREDICTED: ubiquitin-conjugating enzyme E2 J1-like [Vollenhovia emeryi]	556.370299893759	1.35410150876961	0.247742045725876	5.46577188705349	4.60896740447226e-08	2.96508778742932e-06
Contig78893	ref|XP_011861420.1| PREDICTED: antichymotrypsin-2-like isoform X6 [Vollenhovia emeryi]	21.938039483298	1.35618130799264	0.350385451928294	3.87054114412885	0.000108594026329803	0.00269180593798023
Contig43243	#N/A	181.249886037603	1.35700373124069	0.338331333092817	4.01087217916177	6.04948566008246e-05	0.00163775140707715
Contig692	#N/A	101.266895091493	1.35750309359274	0.343032160798079	3.95736391140252	7.57814354938708e-05	0.00198589827885329
Contig23168	#N/A	61.1453605039442	1.35756524467474	0.298406016727399	4.54938965227	5.38017379563747e-06	0.000220032234355121
Contig50875	#N/A	110.456699429691	1.35805735302485	0.351719209375931	3.86119755993568	0.000112832620512389	0.002779092444273
Contig69150	ref|XP_012528902.1| PREDICTED: lipid storage droplets surface-binding protein 2-like [Monomorium pharaonis]	189.79382250685	1.35951590272818	0.332112683885568	4.09353803300272	4.24840351921567e-05	0.00121063877885042
Contig28119	ref|XP_011065022.1| PREDICTED: ERAD-associated E3 ubiquitin-protein ligase HRD1B-like [Acromyrmex echinatior]	15.6374778828013	1.36099224398125	0.448888155506359	3.03191836827596	0.0024300491110058	0.0339635865340555
Contig7328	ref|XP_011878381.1| PREDICTED: lipid storage droplets surface-binding protein 2-like [Vollenhovia emeryi]	402.798073642991	1.36289531912102	0.290258042962237	4.6954609946789	2.66006125987816e-06	0.000119609266477824
Contig127759	ref|XP_011862229.1| PREDICTED: methyltransferase-like protein 16 homolog [Vollenhovia emeryi]	119.412453560581	1.36454599668621	0.29581274824419	4.61287082718893	3.97145132500981e-06	0.000170007702017008
Contig89881	#N/A	6.47552732930731	1.3655967778658	0.446594143696923	3.05780269880241	0.00222966326000652	0.031698663732312
Contig111419	#N/A	157.342981944755	1.36577671206628	0.345577719114786	3.9521550045668	7.74505434161734e-05	0.00202182444559017
Contig25972	#N/A	544.308999071006	1.36641609292311	0.338960470854738	4.03119599603309	5.54937417976171e-05	0.00152311845783081
Contig137541	#N/A	927.205504358335	1.36651991636294	0.361526961409213	3.77985617182275	0.00015691897697335	0.00366461342229446
Contig8959	ref|XP_011861420.1| PREDICTED: antichymotrypsin-2-like isoform X6 [Vollenhovia emeryi]	444.100623012426	1.367219343046	0.308347240620849	4.43402490093032	9.24899366724373e-06	0.000347738571441528
Contig105232	ref|XP_011687091.1| PREDICTED: leukocyte elastase inhibitor-like [Wasmannia auropunctata]	365.372969833134	1.36728654126626	0.302831291466751	4.51501076604027	6.33135492723767e-06	0.000253429860419838
Contig1042	#N/A	56.7342876867768	1.36971238716259	0.279309653438408	4.90392068552202	9.39424341179932e-07	4.72198267623333e-05
Contig36414	ref|XP_011860900.1| PREDICTED: collagen alpha-1(IV) chain-like [Vollenhovia emeryi]	843.800008956531	1.37039433897888	0.350171752386781	3.91349196398121	9.09709293144462e-05	0.0023153261576095
Contig94576	#N/A	637.5412430537	1.3707526659049	0.231598290543365	5.91866486876438	3.24565548902207e-09	2.49804950901384e-07
Contig2981	ref|XP_011165016.1| PREDICTED: serpin B3-like isoform X3 [Solenopsis invicta]	484.081312617006	1.37132298545031	0.296481250077242	4.62532785831496	3.7400631915424e-06	0.000161427412367228
Contig89363	#N/A	44.8737813728503	1.37183184233351	0.329730054250474	4.16046952544829	3.17593994718093e-05	0.000949309940482685
Contig21467	ref|XP_012524156.1| PREDICTED: uncharacterized protein LOC105829670 [Monomorium pharaonis]	936.290217969686	1.37299526887679	0.297138989739701	4.62071729489137	3.82415578079231e-06	0.000164428998749641
Contig3195	ref|XP_012060220.1| PREDICTED: baculoviral IAP repeat-containing protein 7-B-like [Atta cephalotes]	32.3441601726405	1.37318978996134	0.314106646497021	4.3717310832974	1.23265292529362e-05	0.000439214382056671
Contig40405	#N/A	3.66344421606222	1.37331478509648	0.435446530968469	3.15380807384575	0.00161155032332408	0.0244079501392978
Contig114264	ref|XP_012527361.1| PREDICTED: glycine-rich protein DOT1-like [Monomorium pharaonis]	12725.9097874937	1.37517240998649	0.358781125103341	3.83290065660614	0.000126641105034369	0.00306519843264875
Contig25334	ref|XP_015592900.1| PREDICTED: translocon-associated protein subunit gamma [Cephus cinctus]	17.3628617480995	1.37614057766256	0.344151694945856	3.99864535863776	6.37060515926227e-05	0.00170841061512397
Contig5109	ref|XP_011172819.1| PREDICTED: cytochrome P450 9e2-like [Solenopsis invicta]	58.4018459164474	1.37662412566723	0.297538075995896	4.62671582808186	3.71509696742697e-06	0.000160437200557092
Contig111862	ref|XP_012061975.1| PREDICTED: G-protein-signaling modulator 2-like, partial [Atta cephalotes]	6.86710108304349	1.37761679471381	0.450038667570991	3.06110762026131	0.00220519816267262	0.0314167185242867
Contig59815	#N/A	8.76331898689049	1.37858003425529	0.466714490213227	2.95379737111967	0.00313890030419267	0.0416659108711177
Contig18746	ref|XP_011876218.1| PREDICTED: trehalase isoform X2 [Vollenhovia emeryi]	51.0874937806825	1.378940059706	0.353325108970114	3.90275138872918	9.51053766454599e-05	0.00240582364267812
Contig1229	#N/A	30.8826827215145	1.37900643798605	0.406342427237133	3.39370527306836	0.00068953858907442	0.0122814665377907
Contig119712	ref|XP_012543340.1| PREDICTED: uncharacterized protein LOC105840813 isoform X1 [Monomorium pharaonis]	67.0569268975724	1.37916563295067	0.463867069911768	2.97319150767267	0.00294720502547212	0.0395999467278685
Contig69614	ref|XP_012532087.1| PREDICTED: DNA-directed RNA polymerase III subunit RPC7-like [Monomorium pharaonis]	425.407708584177	1.37966222818859	0.247187748835014	5.58143449540228	2.38542894938124e-08	1.62479940502957e-06
Contig140051	#N/A	74.3442109211489	1.38295873965856	0.299690147213816	4.61462865067724	3.9379878388228e-06	0.000168735002456276
Contig33642	#N/A	59.0424893950278	1.38486859984544	0.320907932781067	4.31547013451436	1.59263584117004e-05	0.000537231776306136
Contig108285	#N/A	23.6721077865212	1.38577365580727	0.263659826912851	5.25591506310636	1.47290260517692e-07	8.68084371570893e-06
Contig61497	#N/A	18.5932269663732	1.38585008928712	0.449042195035364	3.08623578053278	0.0020270801299583	0.0293102084171197
Contig13059	#N/A	76.0207896778817	1.38608265689204	0.246434659668104	5.62454428593283	1.85998334438784e-08	1.29022906018319e-06
Contig141248	ref|XP_011629692.1| PREDICTED: sphingomyelin synthase-related protein 1 isoform X1 [Pogonomyrmex barbatus]	104.780713106536	1.3861579190376	0.277269418955242	4.99931771870362	5.75335329772024e-07	3.02299594776069e-05
Contig149691	#N/A	9.07494235616779	1.38649272734532	0.387471977416916	3.57830451788639	0.000345830382963269	0.00700096156966425
Contig44666	ref|XP_011864448.1| PREDICTED: esterase E4 [Vollenhovia emeryi]	270.578165839943	1.38660632064301	0.291636793954809	4.75456577971391	1.98873383908559e-06	9.23947073839512e-05
Contig130369	#N/A	79.4904113019829	1.38671206105656	0.29409165828206	4.71523765467222	2.41428785118326e-06	0.000109685712815085
Contig12582	#N/A	24.6055310843553	1.38679049695318	0.374653711202375	3.70152611728457	0.000214306592062131	0.00472964827998699
Contig80858	ref|XP_012525153.1| PREDICTED: protein transport protein Sec61 subunit gamma [Monomorium pharaonis]	288.665975162188	1.38724701944328	0.231338741129903	5.99660486033469	2.01485523855879e-09	1.59139533093717e-07
Contig2206	ref|XP_011703006.1| PREDICTED: sodium/potassium-transporting ATPase subunit beta-2-like [Wasmannia auropunctata]	610.887452996531	1.38743778027189	0.284702324154196	4.87329277832115	1.09753382367889e-06	5.43722567936527e-05
Contig137614	ref|XP_011866533.1| PREDICTED: uncharacterized protein LOC105561293 [Vollenhovia emeryi]	248.268292053324	1.38798645244168	0.36910101491508	3.76045146546405	0.00016960698068046	0.00390113315434191
Contig138480	ref|XP_012221134.1| PREDICTED: sodium/potassium-transporting ATPase subunit beta-2-like [Linepithema humile]	109.742240808141	1.3883740552709	0.237749770302487	5.83964414983232	5.23124370008524e-09	3.87666602810579e-07
Contig149714	ref|XP_011864458.1| PREDICTED: amyloid beta A4 precursor protein-binding family B member 1-interacting protein isoform X6 [Vollenhovia emeryi]	195.650789985016	1.38838061866952	0.291231067438404	4.76728197606584	1.86727886901161e-06	8.73505196764885e-05
Contig62333	#N/A	67.3761980997278	1.38953592891139	0.321006939378771	4.32867878682154	1.5000653050776e-05	0.000515403740265503
Contig58	#N/A	32.4436900628847	1.39094960013959	0.358541527502975	3.87946581760476	0.000104686110510509	0.00260684946580466
Contig93062	ref|XP_011694545.1| PREDICTED: succinyl-CoA ligase [ADP-forming] subunit beta, mitochondrial-like [Wasmannia auropunctata]	147.161041136847	1.39223884998739	0.393623073694176	3.53698485437132	0.000404722874522533	0.00796489448635884
Contig108312	ref|XP_011859728.1| PREDICTED: uncharacterized protein LOC105557169 isoform X1 [Vollenhovia emeryi]	551.719178288832	1.39267954610716	0.288079006891	4.83436665912316	1.33570198809062e-06	6.47853681734338e-05
Contig148063	ref|XP_011686888.1| PREDICTED: U3 small nucleolar RNA-associated protein 6 homolog [Wasmannia auropunctata]	114.455923612459	1.39344539486539	0.262552686980572	5.30729816895188	1.11262094730466e-07	6.73001682193463e-06
Contig23013	ref|XP_011708028.1| PREDICTED: LOW QUALITY PROTEIN: cartilage oligomeric matrix protein [Wasmannia auropunctata]	116.341068196229	1.3944624182348	0.300342915954047	4.64290097805456	3.43551026960919e-06	0.000150194484107924
Contig23974	ref|XP_012056313.1| PREDICTED: acetyl-coenzyme A transporter 1 [Atta cephalotes]	802.056609950982	1.39613415207961	0.251188267296715	5.55811848660284	2.72698249111977e-08	1.84171814517289e-06
Contig28442	ref|XP_011706718.1| PREDICTED: coiled-coil and C2 domain-containing protein 1-like [Wasmannia auropunctata]	132.87798590106	1.39763998074013	0.259657306433729	5.38263297858264	7.34041110572318e-08	4.5663417967502e-06
Contig31549	#N/A	779.945214017876	1.39805632724761	0.254840892851425	5.48599681787605	4.11144297008622e-08	2.68578625696181e-06
Contig39982	ref|XP_011691788.1| PREDICTED: uncharacterized protein LOC105452417 isoform X2 [Wasmannia auropunctata]	222.059883910986	1.39811281976186	0.263501831660811	5.30589412206272	1.121220273969e-07	6.77296954271855e-06
Contig31183	ref|XP_011689082.1| PREDICTED: amyloid beta A4 precursor protein-binding family B member 1-interacting protein isoform X3 [Wasmannia auropunctata]	521.069224363181	1.39864441331909	0.265280110583349	5.27233048208358	1.34702236594271e-07	8.00855287746406e-06
Contig31173	ref|XP_011708101.1| PREDICTED: uncharacterized protein LOC105462898 [Wasmannia auropunctata]	156.169134115427	1.39902508406282	0.316755615824362	4.41673332427535	1.00203728465668e-05	0.000370643491554288
Contig119270	ref|XP_011697851.1| PREDICTED: uncharacterized protein LOC105455873 [Wasmannia auropunctata]	104.47375593182	1.3991117365758	0.26961316616077	5.18933016699013	2.11051893334018e-07	1.20157814704448e-05
Contig104120	ref|XP_011168566.1| PREDICTED: golgin-84 isoform X1 [Solenopsis invicta]	10.7186420963334	1.40016659043878	0.393997982842411	3.55374050480561	0.000379793756030573	0.00756208345769053
Contig27214	ref|XP_011873670.1| PREDICTED: rap1 GTPase-activating protein 1-like isoform X1 [Vollenhovia emeryi]	207.461290320609	1.40038971140284	0.36921429509802	3.79289136416309	0.000148903310046518	0.00351005970600531
Contig27137	ref|XP_011871308.1| PREDICTED: uncharacterized protein LOC105563916 [Vollenhovia emeryi]	253.338729275652	1.40045965682453	0.317952820763958	4.4046146640863	1.05972077027242e-05	0.00038862350605658
Contig98809	#N/A	5.60797669383822	1.40072118778475	0.429196641077001	3.26358842014667	0.00110010850845103	0.0179747126825395
Contig135946	#N/A	973.637758117959	1.40140294179955	0.460024248756062	3.04636754603491	0.00231624505902195	0.0327033063440087
Contig63786	ref|XP_011691453.1| PREDICTED: lipid storage droplets surface-binding protein 2-like isoform X1 [Wasmannia auropunctata]	715.239118269546	1.40247778447664	0.269505491214969	5.20389316801698	1.95156223836834e-07	1.11859324342386e-05
Contig78894	ref|XP_011704367.1| PREDICTED: antichymotrypsin-2-like isoform X10 [Wasmannia auropunctata]	288.089665804951	1.40308867892848	0.327732190262651	4.28120496129483	1.85884052066053e-05	0.000608459566422536
Contig74605	#N/A	2316.60522783247	1.40388569175569	0.235161619239284	5.9698759359502	2.37434065031996e-09	1.8548031852102e-07
Contig16111	ref|XP_012538876.1| PREDICTED: putative protein MSS51 homolog, mitochondrial [Monomorium pharaonis]	13.0173381806898	1.40569455313988	0.477477372314056	2.94400244838261	0.00323997436419278	0.0426961309324302
Contig33619	ref|XP_011882869.1| PREDICTED: bifunctional glutamate/proline--tRNA ligase [Vollenhovia emeryi]	44.2227938434754	1.40596181241673	0.305234857384908	4.60616400257255	4.1016494543482e-06	0.000174643984019459
Contig38310	#N/A	303.570814164631	1.40638821729982	0.266320221690753	5.28081648615062	1.28609458788142e-07	7.69353469082273e-06
Contig99726	ref|XP_011881371.1| PREDICTED: protein transport protein Sec61 subunit alpha isoform 2 [Vollenhovia emeryi]	568.800022539652	1.40773409079988	0.238190204847193	5.91012586643934	3.41846425980545e-09	2.61325598719987e-07
Contig818	#N/A	2765.05747228653	1.40827568797809	0.357553206762273	3.9386465044751	8.1942553317103e-05	0.00211590683735053
Contig820	#N/A	755.23537869101	1.40968126744666	0.31092424373761	4.53384158951686	5.7920474786164e-06	0.000235385893546624
Contig2477	ref|XP_011637302.1| PREDICTED: LOW QUALITY PROTEIN: uncharacterized protein LOC105427334, partial [Pogonomyrmex barbatus]	20.4192536168807	1.41081523153718	0.464471678435835	3.03746234062812	0.00238579213801311	0.0334795959234799
Contig107972	ref|XP_011860076.1| PREDICTED: aminopeptidase N-like [Vollenhovia emeryi]	487.719510211701	1.41124277046842	0.446213421648561	3.16270802714652	0.00156309013417966	0.0238042566486963
Contig119000	ref|XP_011694061.1| PREDICTED: lactoylglutathione lyase [Wasmannia auropunctata]	9.04287927345584	1.41126445524915	0.379380962723438	3.71991373820709	0.000199290832608193	0.00445542811957261
Contig74606	ref|XP_015521700.1| PREDICTED: protein transport protein Sec61 subunit alpha isoform 2 [Neodiprion lecontei]	207.889982524748	1.41180852280382	0.23858538725281	5.91741405062598	3.27042662310369e-09	2.50999228107291e-07
Contig9892	ref|XP_012060220.1| PREDICTED: baculoviral IAP repeat-containing protein 7-B-like [Atta cephalotes]	8.81496824516869	1.41221345901429	0.467626993184222	3.0199571017021	0.00252810490112349	0.0350093350414542
Contig94	#N/A	143.854791589495	1.41231643331624	0.305243743872871	4.62684808997904	3.71272625071523e-06	0.000160400655547784
Contig63785	ref|XP_011691455.1| PREDICTED: lipid storage droplets surface-binding protein 2-like isoform X2 [Wasmannia auropunctata]	23.6474454150296	1.4123564640803	0.311830588391771	4.52924285383408	5.91954289063184e-06	0.000239562187278468
Contig2440	ref|XP_014485239.1| PREDICTED: heat shock 70 kDa protein cognate 3 [Dinoponera quadriceps]	1856.5277073544	1.41242364074543	0.265410464457093	5.32165769588095	1.02825919549257e-07	6.25881250168447e-06
Contig143091	ref|XP_011690491.1| PREDICTED: elongation of very long chain fatty acids protein AAEL008004 [Wasmannia auropunctata]	170.194735814648	1.41266052237167	0.362566267440036	3.89628227784679	9.76805364928933e-05	0.00245858357014611
Contig105234	ref|XP_011859729.1| PREDICTED: uncharacterized protein LOC105557169 isoform X2 [Vollenhovia emeryi]	248.341595642254	1.41327663863456	0.291691688760428	4.84510424222375	1.26545219712227e-06	6.16426128809411e-05
Contig10343	ref|XP_012135402.1| PREDICTED: dual 3',5'-cyclic-AMP and -GMP phosphodiesterase 11-like isoform X4 [Megachile rotundata]	37.1499182967136	1.41338143193424	0.354380503305994	3.98831600144165	6.65439859867934e-05	0.00177120630335878
Contig78881	#N/A	25.5525844299961	1.41400076716866	0.32976573441482	4.28789476771398	1.803745042541e-05	0.000593289061846119
Contig117138	#N/A	500.556294474792	1.4146779559029	0.355362959683907	3.98093812917712	6.86438162815609e-05	0.00182102161604217
Contig111103	#N/A	244.81717818417	1.41476687836294	0.408543350121143	3.46295412211073	0.000534279484837512	0.00998426044601823
Contig9850	ref|XP_011158354.1| PREDICTED: methyltransferase-like protein 6 isoform X1 [Solenopsis invicta]	53.1625168172738	1.41480678017788	0.405928107954078	3.48536293115711	0.000491469946667292	0.0093439233628681
Contig30253	ref|XP_011639942.1| PREDICTED: serine/threonine-protein phosphatase 4 regulatory subunit 1-like isoform X1 [Pogonomyrmex barbatus]	48.7060566989796	1.41513874843549	0.456144780340148	3.10238943736289	0.00191965239968846	0.027998681494015
Contig23766	ref|XP_011864448.1| PREDICTED: esterase E4 [Vollenhovia emeryi]	602.942748877126	1.41535552753568	0.306274295422697	4.62120246030542	3.81522218548861e-06	0.000164268860785543
Contig43244	#N/A	58.8247176306847	1.41629197372449	0.401736339054524	3.52542659461102	0.000422801334012221	0.00824885341831871
Contig10828	ref|XP_012055985.1| PREDICTED: RNA polymerase II elongation factor Ell [Atta cephalotes]	63.0304550385382	1.41640190646407	0.325945554831618	4.34551686767374	1.38948093512074e-05	0.000485027200863485
Contig99725	ref|XP_011881371.1| PREDICTED: protein transport protein Sec61 subunit alpha isoform 2 [Vollenhovia emeryi]	89.4337595329819	1.41718063612058	0.25730425683018	5.50780097297774	3.63343860055954e-08	2.39312842339136e-06
Contig24244	ref|XP_011866533.1| PREDICTED: uncharacterized protein LOC105561293 [Vollenhovia emeryi]	97.7944562882643	1.41758075742224	0.436515269194356	3.24749409118853	0.00116426081562573	0.0188165970981132
Contig87721	ref|XP_011161367.1| PREDICTED: protein embryonic gonad-like [Solenopsis invicta]	8.90683971252773	1.41788223207578	0.487142086041637	2.91061329477205	0.00360720162499417	0.0464829951702736
Contig2642	ref|XP_011055868.1| PREDICTED: mannose-1-phosphate guanyltransferase alpha [Acromyrmex echinatior]	473.064595622765	1.4189123382867	0.228890908802021	6.19907686903368	5.67952897371276e-10	4.92470359489183e-08
Contig43329	ref|XP_011692346.1| PREDICTED: bifunctional glutamate/proline--tRNA ligase [Wasmannia auropunctata]	25.2086998105121	1.42052593830774	0.261494854409015	5.43232845448589	5.56234175307175e-08	3.53482387301346e-06
Contig112633	ref|XP_014485239.1| PREDICTED: heat shock 70 kDa protein cognate 3 [Dinoponera quadriceps]	472.890200927531	1.42084603473636	0.269697844012469	5.26828844308697	1.37701617145053e-07	8.16897073819298e-06
Contig22542	#N/A	37.8100612782536	1.42149308586719	0.454079507492512	3.13049380650729	0.0017451267918427	0.0260184284024797
Contig73571	ref|XP_012522513.1| PREDICTED: armadillo repeat-containing protein 1-like [Monomorium pharaonis]	15.2225276466676	1.4225120590361	0.43473918189246	3.27210455897666	0.0010675008923581	0.0175415926764881
Contig35605	ref|XP_011862879.1| PREDICTED: uncharacterized protein LOC105559303 [Vollenhovia emeryi]	23.4605957390858	1.42319619208839	0.431913347864468	3.29509657232214	0.000983878616179151	0.0163956395495846
Contig22325	ref|XP_011878653.1| PREDICTED: multidrug resistance-associated protein 5-like isoform X2 [Vollenhovia emeryi]	419.220386463403	1.42404377059086	0.369329085762328	3.85575852400442	0.000115371331510838	0.00282622249846653
Contig134316	ref|XP_011699892.1| PREDICTED: rhythmically expressed gene 5 protein [Wasmannia auropunctata]	131.623219677858	1.42442523978732	0.379880270941484	3.74966890556613	0.000177068200340951	0.00404053961316468
Contig100379	ref|XP_011170174.1| PREDICTED: CD63 antigen-like [Solenopsis invicta]	31.9510962898501	1.42611578252396	0.374868187637928	3.80431263455568	0.000142198496001774	0.0033731164661159
Contig143596	#N/A	37.3522370815454	1.42623713144967	0.30757506539696	4.63703756222552	3.53438201793783e-06	0.000153625539416866
Contig106951	ref|XP_011870749.1| PREDICTED: uncharacterized protein LOC105563624 [Vollenhovia emeryi]	5.34433871229988	1.426618255334	0.471660272728409	3.02467334609601	0.00248901791356829	0.0346090044261371
Contig37070	ref|XP_011690056.1| PREDICTED: 2-oxoglutarate dehydrogenase, mitochondrial isoform X5 [Wasmannia auropunctata]	125.160228144346	1.42710906186762	0.377635999604013	3.77905989726634	0.00015742155796599	0.00367255585102354
Contig26922	#N/A	228.132518151344	1.42714952561115	0.353695908416528	4.034961931	5.46111512166475e-05	0.00150315337144194
Contig1029	#N/A	558.447780967998	1.42865344072554	0.293775083597651	4.8630858111922	1.15569713538062e-06	5.68681826260911e-05
Contig106986	ref|XP_011062490.1| PREDICTED: TBC1 domain family member 20 [Acromyrmex echinatior]	292.426450490607	1.42970263896109	0.322748003951345	4.42977995667673	9.43292864621139e-06	0.000353644272242532
Contig36510	ref|XP_011859729.1| PREDICTED: uncharacterized protein LOC105557169 isoform X2 [Vollenhovia emeryi]	785.479357072347	1.43126611093741	0.280667014332196	5.09951664374557	3.40521927897607e-07	1.86886040995168e-05
Contig16289	#N/A	9.86782039182308	1.43216568360448	0.463738229836309	3.08830627164383	0.0020130089309227	0.0291253806847489
Contig34905	ref|XP_011879005.1| PREDICTED: myosin-2 heavy chain isoform X2 [Vollenhovia emeryi]	10.1361886519554	1.43248863898004	0.418812341849324	3.42035918200186	0.000625385039734091	0.0113596258744306
Contig127052	#N/A	13.6987214548772	1.432806829007	0.449889488553583	3.1847973012518	0.00144855432267686	0.0223664176153364
Contig25463	ref|XP_011686640.1| PREDICTED: uncharacterized protein LOC105449245 isoform X1 [Wasmannia auropunctata]	31.1153702797006	1.43442464736701	0.270869907995655	5.29562201272655	1.18611963499037e-07	7.13323406561348e-06
Contig102881	ref|XP_011703223.1| PREDICTED: armadillo repeat-containing protein 6 homolog [Wasmannia auropunctata]	154.328500490453	1.43492164154185	0.297398234361688	4.82491647814134	1.40061949441594e-06	6.75955915002573e-05
Contig15006	ref|XP_012522380.1| PREDICTED: venom carboxylesterase-6 isoform X1 [Monomorium pharaonis]	45.1070848876157	1.43517114788654	0.404754763508069	3.54577951213645	0.000391453593025289	0.00773744170886628
Contig7576	#N/A	6.37720869608751	1.43538705308229	0.414443968374211	3.46340437457216	0.000533386144864771	0.00997031407990228
Contig7285	ref|XP_011863932.1| PREDICTED: disintegrin and metalloproteinase domain-containing protein 10 isoform X1 [Vollenhovia emeryi]	50.7468050583748	1.43610791311264	0.345382299001776	4.15802407148044	3.21012204276628e-05	0.0009586819879051
Contig210	#N/A	30.9637876324737	1.43672998889408	0.396458801051895	3.62390741505071	0.000290185518360496	0.0060579502192638
Contig138479	ref|XP_011635686.1| PREDICTED: sodium/potassium-transporting ATPase subunit beta-2-like [Pogonomyrmex barbatus]	15.0518568571253	1.43694844306533	0.321616473178952	4.46789441119761	7.89932772306796e-06	0.000303852195699804
Contig20092	#N/A	27.897133238656	1.43748199785476	0.326385606119873	4.40424446085043	1.06153186447423e-05	0.00038918243381673
Contig39006	#N/A	19.4089336822566	1.43889824994913	0.249164036396083	5.77490343615153	7.69972298906789e-09	5.58092054216704e-07
Contig38663	ref|XP_011163662.1| PREDICTED: 2-acylglycerol O-acyltransferase 1-like [Solenopsis invicta]	34.4485470159532	1.44056644411214	0.494631632048358	2.91240258563024	0.00358660051302226	0.046287898931576
Contig50892	ref|XP_014482043.1| PREDICTED: probable methylthioribulose-1-phosphate dehydratase [Dinoponera quadriceps]	19.1545558002207	1.44073884179995	0.367805764890351	3.91711870592747	8.96136277885642e-05	0.00228713897125492
Contig38293	ref|XP_016843423.1| PREDICTED: C-Maf-inducing protein-like [Nasonia vitripennis]	123.043812789685	1.44105487764028	0.377566008735199	3.81669653597166	0.000135250348509026	0.00323489255074128
Contig4309	#N/A	359.246265219872	1.44123114174433	0.390645368695846	3.68935934542325	0.000224819481978437	0.00491832057251554
Contig35546	ref|XP_012531417.1| PREDICTED: collagen alpha-1(II) chain-like [Monomorium pharaonis]	1296.19444619984	1.44199858929757	0.353562475074915	4.07848312803	4.53304913364143e-05	0.00128232149605684
Contig54162	ref|XP_016921060.1| PREDICTED: uncharacterized protein LOC108003370 [Apis cerana]	162.13790826298	1.44258627319421	0.349120721269197	4.13205571972301	3.59533233916026e-05	0.00105262823800276
Contig80751	#N/A	33.9799883102311	1.44302288051198	0.290361078595276	4.9697531345906	6.70381987936233e-07	3.46996881343452e-05
Contig98365	ref|XP_011873116.1| PREDICTED: golgin subfamily A member 2 [Vollenhovia emeryi]	358.980305873027	1.44591809920649	0.307462663167908	4.70274369027	2.56688570061775e-06	0.000115842142230807
Contig78444	ref|XP_011860547.1| PREDICTED: 40S ribosomal protein S3a [Vollenhovia emeryi]	8.68890121652101	1.44672295145817	0.443795657346797	3.25988532674544	0.00111457267390594	0.0181563553872768
Contig13385	ref|XP_011158173.1| PREDICTED: facilitated trehalose transporter Tret1 isoform X1 [Solenopsis invicta]	1743.42616833267	1.44925987807543	0.312279845078396	4.64090110494195	3.46893124554019e-06	0.000151265479721121
Contig21837	ref|XP_011875017.1| PREDICTED: uncharacterized protein LOC105565988 isoform X1 [Vollenhovia emeryi]	55.0228852465544	1.45129358528246	0.439772093875146	3.30010386173911	0.000966490528069646	0.0161654719380411
Contig39973	ref|XP_014475389.1| PREDICTED: uncharacterized protein LOC106744841 isoform X14 [Dinoponera quadriceps]	5.39100027850699	1.4530028994445	0.458750945900136	3.16730224194633	0.00153860316843736	0.0235079010910843
Contig15228	ref|XP_011168512.1| PREDICTED: heat shock 70 kDa protein cognate 3 isoform X3 [Solenopsis invicta]	1080.24889932247	1.45551286851443	0.262582654872535	5.54306555100138	2.97221528962194e-08	1.99739348011293e-06
Contig147510	ref|XP_011698568.1| PREDICTED: 3-phosphoinositide-dependent protein kinase 1 [Wasmannia auropunctata]	339.402339787817	1.45615141523766	0.345991360214714	4.2086351934742	2.56917793643588e-05	0.000789880971824566
Contig84692	#N/A	12.3159493242912	1.45641745391427	0.373855628504916	3.89566812124408	9.79284060727953e-05	0.00246390776644825
Contig142416	ref|XP_011869482.1| PREDICTED: uncharacterized protein LOC105562918 [Vollenhovia emeryi]	153.125250592462	1.45798753531234	0.371971251101231	3.91962424783079	8.86871310882787e-05	0.0022667200519046
Contig84920	#N/A	200.772335307646	1.45840431214189	0.36886274875091	3.95378583790454	7.69242681556333e-05	0.00201118328545557
Contig125419	#N/A	251.673745697104	1.45918087413429	0.241626011344941	6.03900575940556	1.55066710957093e-09	1.23993024408816e-07
Contig110376	ref|XP_014273660.1| PREDICTED: uncharacterized protein LOC106679174 [Halyomorpha halys]	20.071525865976	1.46053215571935	0.474010497788655	3.08122322719221	0.00206152032843143	0.0297005224497929
Contig140870	ref|XP_011860433.1| PREDICTED: chitinase-3-like protein 2 [Vollenhovia emeryi]	109.589515445264	1.46077308094349	0.326427646684004	4.47502868026857	7.64010565198675e-06	0.00029713372179195
Contig74639	#N/A	43.5404834814097	1.46086937780647	0.362459096006159	4.03043927964121	5.56727098678188e-05	0.00152772134277911
Contig117107	ref|XP_012523880.1| PREDICTED: succinyl-CoA ligase [ADP-forming] subunit beta, mitochondrial-like [Monomorium pharaonis]	74.996604975436	1.46142057476473	0.403147045903527	3.62503108881629	0.000288926692599226	0.00603736586905261
Contig36508	ref|XP_011686157.1| PREDICTED: serpin B4-like [Wasmannia auropunctata]	434.212417554699	1.4618497847856	0.282072956964434	5.1825237006677	2.18903539378594e-07	1.24158864865281e-05
Contig123279	#N/A	34.0721857543196	1.46199329956618	0.422240080266724	3.46246926308525	0.000535243046111012	0.00999400391784369
Contig819	#N/A	132.176517347963	1.4626409478119	0.372816562381025	3.92321880356016	8.7373731765666e-05	0.00224117670884604
Contig28406	ref|XP_011063071.1| PREDICTED: serine protease snake-like [Acromyrmex echinatior]	875.100069240081	1.4635708599066	0.340669289813661	4.29616318132799	1.73779681215383e-05	0.00057584467285453
Contig112632	ref|XP_011168508.1| PREDICTED: heat shock 70 kDa protein cognate 3 isoform X1 [Solenopsis invicta]	1030.78207048397	1.46361232883133	0.267126956260416	5.47908885468112	4.27521641258226e-08	2.78338549484364e-06
Contig24444	ref|XP_011863377.1| PREDICTED: espin [Vollenhovia emeryi]	104.424717372674	1.46415084799046	0.505619157093433	2.8957582549031	0.00378243656682808	0.0482636205817493
Contig26139	ref|XP_011703287.1| PREDICTED: RNA polymerase II subunit A C-terminal domain phosphatase isoform X2 [Wasmannia auropunctata]	490.314655688768	1.46570536733359	0.257987279671808	5.68130866451306	1.33667993677987e-08	9.44127671596175e-07
Contig67109	ref|XP_014770344.1| PREDICTED: coatomer subunit delta-like [Octopus bimaculoides]	9.43897832800671	1.4657396659207	0.471397914371897	3.10934694709817	0.00187501400457862	0.0275163022634915
Contig88193	ref|XP_011870249.1| PREDICTED: microphthalmia-associated transcription factor isoform X1 [Vollenhovia emeryi]	5.4271815108823	1.46767578359755	0.440918964152115	3.32867466115884	0.000872602712857761	0.0148720804702139
Contig5366	ref|XP_012061210.1| PREDICTED: kelch-like ECH-associated protein 1 [Atta cephalotes]	337.98693670615	1.46853383436335	0.310326190557878	4.73222653789983	2.22070371151739e-06	0.000101845963183537
Contig38311	#N/A	362.933891797174	1.46903658705521	0.288924067696701	5.08450749280374	3.68581218939755e-07	2.0106505802613e-05
Contig63095	#N/A	72.6684939104965	1.47080190838637	0.419264848004341	3.50804966213418	0.000451404774734153	0.00870051266640099
Contig68431	ref|XP_011645692.1| PREDICTED: LOW QUALITY PROTEIN: dual specificity tyrosine-phosphorylation-regulated kinase 4 [Pogonomyrmex barbatus]	26.9763217997711	1.47108222711624	0.48645725801091	3.02407293321389	0.0024939630763413	0.0346583993535873
Contig110425	#N/A	12.6883945279339	1.47135490067889	0.419841098280697	3.50455185712946	0.000457376481670783	0.00879062559315498
Contig15751	#N/A	65.8737474512538	1.47219921835079	0.277683338624516	5.30171966976205	1.14716902209954e-07	6.91431910057806e-06
Contig65033	ref|XP_011686263.1| PREDICTED: uncharacterized protein LOC105449007 [Wasmannia auropunctata]	4.38643483031249	1.47307258151166	0.450897608085828	3.26697803469222	0.00108702114050898	0.0177908864287937
Contig87187	ref|XP_012540269.1| PREDICTED: asparagine synthetase [glutamine-hydrolyzing] [Monomorium pharaonis]	124.23038406102	1.47408775042839	0.29184369607891	5.05094943023823	4.39619455778178e-07	2.35832883211637e-05
Contig138533	ref|XP_011159632.1| PREDICTED: mitoferrin-1 isoform X2 [Solenopsis invicta]	36.4927021832011	1.47516503720999	0.417989800366954	3.52918907570217	0.000416835200899455	0.00815356828714536
Contig1411	#N/A	153.126283590645	1.47549933303323	0.226874825391223	6.50358333274255	7.84289423881891e-11	7.9010535764126e-09
Contig129267	ref|XP_012537205.1| PREDICTED: serpin B3-like [Monomorium pharaonis]	1545.59236942279	1.47576861076445	0.283103381429941	5.21282579992658	1.85985530542735e-07	1.07110473289653e-05
Contig36529	ref|XP_011870067.1| PREDICTED: thyroid receptor-interacting protein 6 [Vollenhovia emeryi]	12.3873525546033	1.47727300702743	0.38367304989653	3.85034343023527	0.000117952313968622	0.00288215947865599
Contig31181	ref|XP_011054507.1| PREDICTED: amyloid beta A4 precursor protein-binding family B member 1-interacting protein-like isoform X3 [Acromyrmex echinatior]	23.7713469218749	1.47742897266846	0.306301836520866	4.82344144406661	1.41102204465225e-06	6.78561501998122e-05
Contig17655	ref|XP_011642389.1| PREDICTED: solute carrier family 22 member 5-like isoform X3 [Pogonomyrmex barbatus]	20.0787212804912	1.47751846581975	0.371227017980232	3.98009410483809	6.8887992804885e-05	0.00182714184553915
Contig16083	#N/A	196.461546503321	1.47778358473201	0.328745193775333	4.49522491191745	6.9496450509398e-06	0.000274452290022758
Contig12880	ref|XP_011058115.1| PREDICTED: uncharacterized protein LOC105148226 isoform X3 [Acromyrmex echinatior]	112.097939328608	1.47782633848437	0.344235829167116	4.29306368851841	1.76224429612008e-05	0.000582322119819758
Contig12598	#N/A	228.503381662087	1.47847635797293	0.263187847689902	5.61757076153049	1.93660871981049e-08	1.34063938197233e-06
Contig43331	ref|XP_014485239.1| PREDICTED: heat shock 70 kDa protein cognate 3 [Dinoponera quadriceps]	481.661179425819	1.47931896246661	0.261580205482145	5.65531692178285	1.55558965790859e-08	1.09192409869366e-06
Contig39334	#N/A	3.9409517082823	1.48070025284762	0.493600784967345	2.99979314851692	0.00270163010108197	0.036903592317499
Contig25458	#N/A	18.0354951216536	1.48215661614242	0.350099665062753	4.23352766097835	2.30053871424133e-05	0.000722355307231128
Contig22414	#N/A	32.6862466155339	1.48222365811245	0.418983864568768	3.53766286355204	0.000403685140351143	0.00794908619479889
Contig112423	ref|XP_011633375.1| PREDICTED: LOW QUALITY PROTEIN: probable palmitoyltransferase ZDHHC16 [Pogonomyrmex barbatus]	130.067779445762	1.48274339663129	0.371621055579242	3.98993376282232	6.60917493847394e-05	0.00176193562041715
Contig119271	ref|XP_014473486.1| PREDICTED: uncharacterized protein LOC106743802 [Dinoponera quadriceps]	895.472558488383	1.48355593574914	0.262807231753605	5.64503467370351	1.65147961592804e-08	1.15564373908393e-06
Contig93064	ref|XP_012523880.1| PREDICTED: succinyl-CoA ligase [ADP-forming] subunit beta, mitochondrial-like [Monomorium pharaonis]	71.2170692238304	1.48699550405644	0.370561543397925	4.0128165767586	5.99985339916827e-05	0.00162732823774961
Contig30928	ref|XP_011162060.1| PREDICTED: uncharacterized protein LOC105197419 isoform X1 [Solenopsis invicta]	573.924151188212	1.4870483176356	0.313759205672323	4.73945717209844	2.14291521220112e-06	9.86636264235865e-05
Contig109538	#N/A	10.9745040062534	1.4886105767832	0.508573769420985	2.92702979644034	0.00342216092833997	0.0445857365871743
Contig13895	ref|XP_011861887.1| PREDICTED: LOW QUALITY PROTEIN: uncharacterized protein LOC105558679 [Vollenhovia emeryi]	72.1759407630277	1.48964004765149	0.30450577683304	4.89199273374789	9.98201308076887e-07	4.987843485392e-05
Contig73228	ref|XP_014219636.1| PREDICTED: uncharacterized protein LOC106647649 [Copidosoma floridanum]	125.656203734256	1.49088311903102	0.343669297645778	4.33813299367722	1.4369819574696e-05	0.000499423042491754
Contig41703	ref|XP_011858343.1| PREDICTED: uncharacterized protein LOC105555904 [Vollenhovia emeryi]	8.36565419755622	1.49088326641886	0.453238029188229	3.2894046183395	0.00100399578885989	0.0166735102755872
Contig18762	ref|XP_011058115.1| PREDICTED: uncharacterized protein LOC105148226 isoform X3 [Acromyrmex echinatior]	786.672149179688	1.49107933618822	0.234927596482068	6.34697395502462	2.19591289096403e-10	2.04952877353886e-08
Contig80502	ref|XP_012059717.1| PREDICTED: cytohesin-1 [Atta cephalotes]	8.82529083803924	1.49115742722325	0.446574928769575	3.33909794562753	0.00084050923052805	0.0144375957933921
Contig112340	#N/A	24.8452185719221	1.49333848214978	0.360130055188534	4.14666440813441	3.37353964052505e-05	0.00099912471022093
Contig31029	ref|XP_011063080.1| PREDICTED: uncharacterized protein LOC105151212 isoform X1 [Acromyrmex echinatior]	16.2337596717951	1.49367269071733	0.513859470993745	2.90677271711805	0.00365178423157729	0.0469415229176419
Contig16531	#N/A	20.6922662533202	1.49461167265328	0.4313593890774	3.46488730858504	0.000530453706466155	0.00992901949815378
Contig23222	ref|XP_011692809.1| PREDICTED: uncharacterized protein LOC105452946 isoform X2 [Wasmannia auropunctata]	30.0091567035249	1.49668013141302	0.34768806491977	4.30466352579109	1.67239722402353e-05	0.000557112446914091
Contig84252	#N/A	25.8088640054059	1.49733895739062	0.33117987220884	4.52122572366476	6.1482584671094e-06	0.000247709424764877
Contig16206	ref|XP_011705946.1| PREDICTED: coagulation factor IX-like, partial [Wasmannia auropunctata]	1252.369422318	1.49761564802582	0.306976941826063	4.87859328820333	1.0684512644699e-06	5.31147176612249e-05
Contig69142	#N/A	5.3130146524225	1.49773709397802	0.477752444772528	3.13496479267863	0.00171874738031423	0.0257099279984485
Contig97404	ref|XP_011867861.1| PREDICTED: mitochondrial uncoupling protein 2-like [Vollenhovia emeryi]	50.2049017081278	1.49789177005792	0.475018006688858	3.15333681874307	0.0016141544534894	0.0244394805032365
Contig58987	#N/A	73.1109918324688	1.49810637876221	0.378677733336231	3.95615122537988	7.61669553228224e-05	0.00199484462710491
Contig64867	#N/A	48.3312689756832	1.49976373874762	0.394153280439712	3.80502665631629	0.000141788920158314	0.003365166716547
Contig108311	#N/A	215.414674953996	1.50046197743051	0.283107879404531	5.29996544280742	1.15824601391765e-07	6.97488343389999e-06
Contig12641	ref|XP_011157298.1| PREDICTED: glutaredoxin-C4-like isoform X1 [Solenopsis invicta]	6.46203961785909	1.50153318934407	0.470854292338479	3.18895508393216	0.00142788061958341	0.0221177158588446
Contig87577	ref|XP_011686888.1| PREDICTED: U3 small nucleolar RNA-associated protein 6 homolog [Wasmannia auropunctata]	86.2434527992944	1.50229660797408	0.434695924043142	3.45597123157056	0.000548313838430096	0.0101959458226874
Contig63869	#N/A	10.1564206173133	1.50296883068005	0.481874040987928	3.11900767179468	0.00181461236445407	0.0268448610442974
Contig25769	ref|XP_011871133.1| PREDICTED: endoribonuclease Dicer [Vollenhovia emeryi]	104.845594063736	1.50325835670095	0.315971443052719	4.7575766410325	1.95930877347783e-06	9.11525557483438e-05
Contig22299	#N/A	472.310697046733	1.50527126960656	0.365486454677424	4.11854187848112	3.81277285909811e-05	0.00110625883293481
Contig13829	ref|XP_011693959.1| PREDICTED: probable palmitoyltransferase ZDHHC16 isoform X3 [Wasmannia auropunctata]	1014.93811179872	1.50546471495027	0.369186530834917	4.07778883900682	4.5466029875881e-05	0.00128561930266633
Contig14887	ref|XP_011706009.1| PREDICTED: cytochrome P450 4C1-like [Wasmannia auropunctata]	60.3487554163021	1.50581397472969	0.40870046373683	3.68439507252264	0.000229246436682823	0.00499743228810551
Contig82996	ref|XP_011165367.1| PREDICTED: polyhomeotic-like protein 2 isoform X4 [Solenopsis invicta]	46.234066000522	1.50679067103008	0.442130342431873	3.4080236672792	0.000654352189645944	0.0117800767087011
Contig59909	ref|XP_011647281.1| PREDICTED: metal transporter CNNM4 [Pogonomyrmex barbatus]	45.8326978349585	1.50713851069139	0.47301655610494	3.18622782065375	0.00144141043468523	0.0222913483344478
[truncated: 4,137 more rows]

## Sheet: b)
Contig	Annotation	baseMean	log2FoldChange	lfcSE	stat	pvalue	padj
Contig63205	#N/A	524.540604670436	-0.179945176968075	0.0571584703090341	-3.14818041832085	0.00164290258067524	0.0247804015766535
Contig31242	ref|XP_011879765.1| PREDICTED: E3 ubiquitin-protein ligase RNF13-like [Vollenhovia emeryi]	1039.88728109088	-0.208374185635065	0.0719127801822057	-2.89759601988835	0.00376034610555817	0.0480449724412931
Contig48551	ref|XP_011862868.1| PREDICTED: N-alpha-acetyltransferase 30-like [Vollenhovia emeryi]	550.276071155093	-0.218327490270269	0.065332634098692	-3.3417830657258	0.000832420910506485	0.0143240615857666
Contig29797	#N/A	179.246901988571	-0.221513876313914	0.0767649083189141	-2.88561376760396	0.00390651241969228	0.0495397208980876
Contig128948	ref|XP_011163388.1| PREDICTED: 26S proteasome non-ATPase regulatory subunit 13 [Solenopsis invicta]	412.34427561173	-0.223583000014407	0.0736011520205535	-3.03776495172209	0.00238339779516118	0.033456382216436
Contig70941	#N/A	570.954146226309	-0.224331085603639	0.0774803272644313	-2.89532960848272	0.00378760595199321	0.0483164700944038
Contig22161	ref|XP_012539260.1| PREDICTED: uncharacterized protein LOC105838320 [Monomorium pharaonis]	941.167632013468	-0.228703090613967	0.0739193561677082	-3.09395403952228	0.00197508080754963	0.0286867953984187
Contig24471	ref|XP_011166234.1| PREDICTED: zinc finger and BTB domain-containing protein 11-like [Solenopsis invicta]	363.592198443857	-0.230142044228603	0.079354575579541	-2.90017358857802	0.00372956053758053	0.0477342279279584
Contig10082	ref|XP_011172112.1| PREDICTED: mitochondrial-processing peptidase subunit beta [Solenopsis invicta]	979.234152638752	-0.23108164819672	0.0776839475284522	-2.97463833325521	0.0029333416356949	0.0394488489273233
Contig135684	ref|XP_011689137.1| PREDICTED: gamma-tubulin complex component 6-like [Wasmannia auropunctata]	580.107839076829	-0.23112120665878	0.0729593103399554	-3.16780964049504	0.00153592053158538	0.0234722027237345
Contig141084	ref|XP_012222215.1| PREDICTED: LOW QUALITY PROTEIN: 26S protease regulatory subunit 8-like [Linepithema humile]	350.950364556015	-0.233059366837326	0.0786720217958663	-2.96241740732246	0.00305233686526519	0.0407211752016209
Contig25190	ref|XP_011862846.1| PREDICTED: lysoplasmalogenase-like protein TMEM86A [Vollenhovia emeryi]	917.921676185878	-0.242036998918388	0.0644642566569499	-3.75459225732487	0.00017362388640989	0.00397062895979608
Contig1777	ref|XP_011685652.1| PREDICTED: NADH dehydrogenase [ubiquinone] flavoprotein 2, mitochondrial [Wasmannia auropunctata]	501.028283639769	-0.247324272788998	0.0740637248497887	-3.33934423755497	0.000839764306131575	0.0144266273893752
Contig28430	ref|XP_011872801.1| PREDICTED: basic salivary proline-rich protein 2-like [Vollenhovia emeryi]	1677.12357549816	-0.248501948828945	0.0821051634640233	-3.02662997483506	0.00247296477783832	0.0344472016284615
Contig17326	ref|XP_012062751.1| PREDICTED: gamma-soluble NSF attachment protein-like [Atta cephalotes]	458.444283669025	-0.249419261674531	0.0793580158224884	-3.14296242275568	0.00167247309044103	0.0251682031742958
Contig6868	#N/A	327.300798561434	-0.251185137231039	0.0647425632925098	-3.87975273849097	0.00010456270368533	0.00260569027886482
Contig17669	ref|XP_011686899.1| PREDICTED: SAP30-binding protein [Wasmannia auropunctata]	327.160539649171	-0.251662116520689	0.0761994172699311	-3.30267770459705	0.000957663872680382	0.0160435612637032
Contig106908	ref|XP_011053142.1| PREDICTED: uncharacterized protein LOC105145354 [Acromyrmex echinatior]	798.483023757781	-0.253632800887919	0.0817687530806157	-3.10183036101655	0.00192328138066738	0.0280455786191212
Contig84979	ref|XP_011061994.1| PREDICTED: pre-mRNA-processing-splicing factor 8 [Acromyrmex echinatior]	1439.26714556645	-0.257705425015235	0.080963336439282	-3.18298919423238	0.00145763054004912	0.0224835200248205
Contig14906	ref|XP_011700100.1| PREDICTED: acyl-CoA-binding domain-containing protein 4 [Wasmannia auropunctata]	1022.8406831388	-0.265373589842768	0.0892500357990412	-2.97337236301276	0.00294546881749732	0.0395805398549427
Contig5327	ref|XP_011698218.1| PREDICTED: acyl-CoA dehydrogenase family member 9, mitochondrial [Wasmannia auropunctata]	579.676029876329	-0.266103376787264	0.0868188200276494	-3.06504254149639	0.00217639037592231	0.0310552403661961
Contig102302	#N/A	302.307476971295	-0.26706937922508	0.089217360133224	-2.99346874673581	0.00275825756848117	0.0375314549567516
Contig14569	#N/A	230.767292450183	-0.272364688775036	0.0850141211942119	-3.20375821038987	0.00135646343113963	0.0212493279138928
Contig127800	ref|XP_011634620.1| PREDICTED: LOW QUALITY PROTEIN: SWI/SNF-related matrix-associated actin-dependent regulator of chromatin subfamily A containing DEAD/H box 1 homolog [Pogonomyrmex barbatus]	292.909168592588	-0.272940990196665	0.0926614841283978	-2.9455711050177	0.00322359045445877	0.042554657440959
Contig26819	ref|XP_011871211.1| PREDICTED: uncharacterized protein LOC105563867 isoform X1 [Vollenhovia emeryi]	285.306076800407	-0.273345974594567	0.0866023910136619	-3.15633288405912	0.00159766409837305	0.0242273978571803
Contig26041	ref|XP_011862679.1| PREDICTED: 26S proteasome non-ATPase regulatory subunit 1 [Vollenhovia emeryi]	918.310198766208	-0.273562581843647	0.0913974694871221	-2.99310892718088	0.00276151168992358	0.0375588853993878
Contig6209	ref|XP_011693027.1| PREDICTED: hsp90 co-chaperone Cdc37 [Wasmannia auropunctata]	614.194358692625	-0.273842639859348	0.0763275080549364	-3.58773195716348	0.00033356694358066	0.00678206109246591
Contig107472	ref|XP_012063487.1| PREDICTED: COP9 signalosome complex subunit 7 [Atta cephalotes]	208.621330464459	-0.280908430261117	0.086295099318225	-3.25520721895491	0.00113309658780998	0.0184050497855148
Contig115313	ref|XP_011645163.1| PREDICTED: LOW QUALITY PROTEIN: serine/threonine-protein kinase ULK2 [Pogonomyrmex barbatus]	172.583615034844	-0.281818487940841	0.0904174304770647	-3.11686017235722	0.00182788246922901	0.0269827071302591
Contig111279	ref|XP_011878029.1| PREDICTED: histone-lysine N-methyltransferase trithorax isoform X1 [Vollenhovia emeryi]	630.661468211535	-0.282740223241636	0.0951990271248343	-2.96999067932574	0.00297808784695524	0.0399555209019577
Contig8844	ref|XP_011687402.1| PREDICTED: dihydrolipoyllysine-residue acetyltransferase component of pyruvate dehydrogenase complex, mitochondrial isoform X2 [Wasmannia auropunctata]	726.002970443352	-0.283164022357306	0.0862838076246382	-3.28177476345456	0.00103155968217107	0.0170436080333757
Contig123761	#N/A	216.614320244134	-0.283999045578261	0.093232618539335	-3.04613396070648	0.00231804532475336	0.0327141987647816
Contig7302	ref|XP_011865649.1| PREDICTED: NADH-ubiquinone oxidoreductase 49 kDa subunit [Vollenhovia emeryi]	390.53836041993	-0.284509825801593	0.0846517739744656	-3.3609434562755	0.000776767256785697	0.0135364321205006
Contig31151	ref|XP_012059309.1| PREDICTED: probable methyltransferase-like protein 15 homolog [Atta cephalotes]	601.38103246521	-0.286263474283779	0.0890854518108913	-3.21335828089477	0.00131192523979747	0.0207022840900505
Contig22347	ref|XP_011698226.1| PREDICTED: centromere/kinetochore protein zw10 homolog [Wasmannia auropunctata]	1403.68677166786	-0.287373814912491	0.0996276497984578	-2.88447851067284	0.00392062515641743	0.0496861657753849
Contig9857	ref|XP_016984660.1| PREDICTED: histone H3.3 [Drosophila rhopaloa]	538.635395311133	-0.288477429194156	0.0936313319202555	-3.0809924763203	0.00206311861877247	0.0297203917958583
Contig48247	#N/A	426.52339288195	-0.289036383690741	0.0918295803707249	-3.14753026774023	0.0016465605792944	0.0248300529745837
Contig3207	ref|XP_011692391.1| PREDICTED: peroxisomal membrane protein PEX16 [Wasmannia auropunctata]	587.558027933318	-0.289716230192837	0.0857434368896667	-3.37887354067273	0.00072783479597112	0.0128254402313965
Contig26127	ref|XP_012056383.1| PREDICTED: E3 ubiquitin-protein ligase znrf1 [Atta cephalotes]	554.177468251371	-0.295139179369879	0.0834543767214278	-3.53653326481677	0.000405415441812842	0.00797273922940933
Contig27592	ref|XP_011163995.1| PREDICTED: contactin [Solenopsis invicta]	589.13049075039	-0.295389873394448	0.102348382406723	-2.88612156292412	0.00390021480407261	0.0494801580487622
Contig52	ref|XP_012063603.1| PREDICTED: NEDD4 family-interacting protein 1-like [Atta cephalotes]	352.009418383567	-0.301618019190173	0.0982762250473495	-3.06908429831176	0.00214715995175399	0.0307319208123658
Contig43148	ref|XP_011648122.1| PREDICTED: proteasome subunit beta type-7 [Pogonomyrmex barbatus]	464.460138117842	-0.30260765330153	0.104085910559052	-2.90728737132821	0.00364578103476651	0.0468865765053414
[truncated: 4,538 more rows]
