# Supplementary material for: Immune challenge reduces gut microbial diversity and triggers fertility-dependent gene expression changes in a social insect
Source: BMC Genomics. 2020 Nov 23;21:816. doi: 10.1186/s12864-020-07191-9 (PMC7682046; doi:10.1186/s12864-020-07191-9)
Supplement: Supplementary file 1 — Additional file 1. Additional methodological details, Figures S1 and S2 and Table S2. Description of additional supplementary tables (Tables S1, S3-S18) are also provided. [file 12864_2020_7191_MOESM1_ESM.zip › Table_S16.xlsx]

## Sheet: Sheet1
Family	Log fold change	Adjusted P-value
[Chthoniobacteraceae]	-1.24197	0.78
Conexibacteraceae	-0.60714	0.78
Brucellaceae	0.718241	0.78
Sinobacteraceae	0.79464	0.78
Rhodobacteraceae	0.983804	0.78
Leptotrichiaceae	-1.03484	0.835714
[Mogibacteriaceae]	0.574518	0.835714
no_match	-0.922667	0.856098
Flavobacteriaceae	-0.782015	0.856098
Corynebacteriaceae	-0.75592	0.856098
Enterobacteriaceae	-0.671219	0.856098
Cardiobacteriaceae	-0.606592	0.856098
Xanthomonadaceae	-0.586187	0.856098
Planctomycetaceae	-0.584737	0.856098
Brevibacteriaceae	-0.571099	0.856098
[Tissierellaceae]	-0.567465	0.856098
Sphingomonadaceae	-0.546886	0.856098
Intrasporangiaceae	-0.513687	0.856098
Deinococcaceae	-0.499372	0.856098
Aerococcaceae	-0.487381	0.856098
Moraxellaceae	-0.476826	0.856098
Bacteroidaceae	-0.475323	0.856098
[Weeksellaceae]	-0.472955	0.856098
Microbacteriaceae	-0.444487	0.856098
Prevotellaceae	-0.409107	0.856098
Methylocystaceae	-0.384274	0.856098
Geodermatophilaceae	-0.376398	0.856098
Lachnospiraceae	-0.357964	0.856098
Xenococcaceae	-0.324501	0.856098
Nostocaceae	-0.315616	0.856098
Lactobacillaceae	-0.28656	0.856098
Porphyromonadaceae	-0.28402	0.856098
Listeriaceae	-0.2405	0.856098
Methylobacteriaceae	0.341382	0.856098
Aeromonadaceae	0.352339	0.856098
Chitinophagaceae	0.475195	0.856098
Acetobacteraceae	0.475458	0.856098
Micrococcaceae	0.639886	0.856098
Bartonellaceae	0.652572	0.856098
Verrucomicrobiaceae	0.770927	0.856098
Entomoplasmataceae	0.863768	0.856098
Ellin6075	-0.439001	0.856818
Staphylococcaceae	0.305926	0.856818
Comamonadaceae	0.374276	0.856818
Rhizobiaceae	-0.333914	0.861957
Sphingobacteriaceae	0.337889	0.861957
Veillonellaceae	-0.328478	0.885106
Neisseriaceae	-0.193722	0.934375
Pseudomonadaceae	0.228214	0.955102
Dermabacteraceae	-0.178056	0.995312
Burkholderiaceae	-0.139082	0.995312
Spirochaetaceae	-0.122557	0.995312
Streptococcaceae	-0.119075	0.995312
Thermaceae	-0.0449933	0.995312
Actinomycetaceae	-0.0350384	0.995312
Oxalobacteraceae	0.0164397	0.995312
Rhodospirillaceae	0.0187225	0.995312
[Paraprevotellaceae]	0.0354996	0.995312
Pasteurellaceae	0.061966	0.995312
Clostridiaceae	0.0658798	0.995312
Cytophagaceae	0.0922736	0.995312
Gemellaceae	0.106149	0.995312
Rickettsiaceae	0.10968	0.995312
Campylobacteraceae	0.12735	0.995312
Acidobacteriaceae	-0.0201205	1
