# Supplementary material for: Immune challenge reduces gut microbial diversity and triggers fertility-dependent gene expression changes in a social insect
Source: BMC Genomics. 2020 Nov 23;21:816. doi: 10.1186/s12864-020-07191-9 (PMC7682046; doi:10.1186/s12864-020-07191-9)
Supplement: Supplementary file 1 — Additional file 1. Additional methodological details, Figures S1 and S2 and Table S2. Description of additional supplementary tables (Tables S1, S3-S18) are also provided. [file 12864_2020_7191_MOESM1_ESM.zip › Table_S17.xlsx]

## Sheet: Sheet1
Family	Log fold change	Adjusted P-value	Cell wall structure	# Non-immune-challenged samples with microbial family
[Paraprevotellaceae]	-2.59563	0	gram-negative	16
Veillonellaceae	-2.50185	0	gram-negative	16
Leptotrichiaceae	-2.25341	0	gram-negative	16
Streptococcaceae	-2.24286	0	gram-positive	16
Gemellaceae	-2.16315	0	gram-positive	16
Pasteurellaceae	-2.03313	0	gram-negative	16
Lachnospiraceae	-1.95226	0	gram-positive	16
Prevotellaceae	-1.95019	0	gram-negative	16
Chitinophagaceae	-1.85107	0	gram-negative	15
Flavobacteriaceae	-1.84721	0	gram-negative	16
Comamonadaceae	-1.82939	0	gram-negative	16
Rhodobacteraceae	-1.82872	0	gram-negative	15
Neisseriaceae	-1.81945	0	gram-negative	16
Planctomycetaceae	-1.77294	0	gram-negative	14
Brevibacteriaceae	-1.64553	0	gram-positive	16
Cardiobacteriaceae	-1.59912	0	gram-negative	15
Methylocystaceae	-1.21984	0	gram-negative	15
Actinomycetaceae	-1.16308	0	gram-positive	15
Oxalobacteraceae	-1.12015	0	gram-negative	12
Campylobacteraceae	-1.50627	0.0325	gram-negative	14
Micrococcaceae	-1.24909	0.0541667	gram-positive	16
Clostridiaceae	-1.014	0.0541667	gram-positive	5
Rhodospirillaceae	-0.882084	0.0541667	gram-negative	9
Sinobacteraceae	-0.82752	0.0541667	gram-negative	8
[Tissierellaceae]	-1.28952	0.078	gram-positive	16
Cytophagaceae	-1.6995	0.0866667	gram-negative	11
Enterobacteriaceae	-1.65748	0.0866667	gram-negative	16
Xenococcaceae	-1.16886	0.0866667	gram-negative	5
Aeromonadaceae	-0.87358	0.0866667	gram-negative	7
Pseudomonadaceae	1.74274	0.0866667	gram-negative	16
Dermabacteraceae	-1.40708	0.0984848	gram-positive	16
Intrasporangiaceae	-1.36223	0.0984848	gram-positive	16
Sphingobacteriaceae	-1.34988	0.0984848	gram-negative	14
Microbacteriaceae	-1.10973	0.114706	gram-positive	15
Moraxellaceae	-1.3088	0.136842	gram-negative	13
Deinococcaceae	-1.06085	0.136842	gram-positive	11
Bacteroidaceae	-0.831323	0.136842	gram-negative	12
Porphyromonadaceae	-0.65902	0.136842	gram-negative	9
[Weeksellaceae]	-1.05179	0.2275	gram-negative	16
Xanthomonadaceae	-1.01214	0.236364	gram-negative	15
Sphingomonadaceae	-0.827481	0.236364	gram-negative	15
Listeriaceae	-0.405741	0.236364	gram-positive	7
Entomoplasmataceae	1.52787	0.236364	gram-negative	11
Thermaceae	-0.430926	0.245556	gram-negative	6
Nostocaceae	-0.598495	0.268478	gram-negative	4
Burkholderiaceae	-0.592387	0.276596	gram-negative	13
Geodermatophilaceae	-0.376398	0.419792	gram-positive	7
Corynebacteriaceae	-0.758822	0.458824	gram-positive	16
Staphylococcaceae	-0.368114	0.458824	gram-positive	7
Rickettsiaceae	0.28656	0.458824	gram-negative	2
Acidobacteriaceae	-0.42292	0.5125	gram-negative	4
Spirochaetaceae	-0.410322	0.613208	gram-negative	10
Lactobacillaceae	-0.28656	0.673636	gram-positive	8
Conexibacteraceae	-0.256221	0.673636	gram-positive	4
Acetobacteraceae	-0.353211	0.694828	gram-negative	11
Verrucomicrobiaceae	-0.295008	0.694828	gram-negative	4
[Mogibacteriaceae]	-0.211157	0.694828	gram-positive	8
Rhizobiaceae	-0.276651	0.704167	gram-negative	13
Methylobacteriaceae	-0.27198	0.704167	gram-negative	8
Brucellaceae	0.104879	0.841803	gram-negative	6
[Chthoniobacteraceae]	0.0238669	0.954032	gram-negative	3
Ellin6075	-0.0369187	0.969841	gram-negative	6
Aerococcaceae	0.0392602	0.985156	gram-positive	15
Bartonellaceae	0.14485	0.99	gram-negative	6
