# Supplementary material for: Immune challenge reduces gut microbial diversity and triggers fertility-dependent gene expression changes in a social insect
Source: BMC Genomics. 2020 Nov 23;21:816. doi: 10.1186/s12864-020-07191-9 (PMC7682046; doi:10.1186/s12864-020-07191-9)
Supplement: Supplementary file 1 — Additional file 1. Additional methodological details, Figures S1 and S2 and Table S2. Description of additional supplementary tables (Tables S1, S3-S18) are also provided. [file 12864_2020_7191_MOESM1_ESM.zip › Table_S18.xlsx]

## Sheet: Sheet1
Effector genes	Isoforms	Contigs	Upregulated in IC
Abaecin
		Contig9333	yes
		Contig9334	yes
		Contig78995	yes
		Contig148618	yes
Transferrin
		Contig147514	no
		Contig3765	no
		Contig32087	no
		Contig3764	no
		Contig143780	no
		Contig50736	no
		Contig132094	no
		Contig127477	no
		Contig127478	no
		Contig117660	no
		Contig18021	no
		Contig62868	no
		Contig147240	no
		Contig97468	no
		Contig29320	no
		Contig117660	no
	X1	Contig29728	yes
	X1	Contig95942	yes
	X1	Contig143779	no
	X2	Contig11546	no
	X2	Contig147513	no
	X2	Contig29782	no
Lysozyme
		Contig52009	no
		Contig27498	no
		Contig52008	no
		Contig69569	no
		Contig67175	no
Lysozyme 2
		Contig106999	yes
		Contig106998	yes
Hymenoptaecin
		Contig139896	yes
		Contig9209	yes
Ferritin
		Contig9184	no
		Contig136787	no
		Contig125372	no
		Contig78215	no
		Contig136786	no
		Contig90201	no
		Contig113552	no
		Contig113554	no
		Contig113551	no
		Contig113553	no
		Contig59576	no
		Contig59577	no
		Contig59578	no
Defensin
		Contig122648	no
		Contig122649	no
		Contig122654	no
		Contig149788	yes
		Contig17386	no
		Contig17387	yes
		Contig77551	yes
		Contig79699	no
		Contig80409	yes
		Contig9560	yes
Defensin-2
		Contig2327	yes
		Contig123122	no
Sapecin-C
		Contig9559	no
		Contig9561	yes
		Contig122657	no
Phormicin
		Contig53283	yes
		Contig53284	yes
		Contig77550	no
